# Supplementary material for: Screening of MYB1R1 interaction with LDOX promoter to regulate anthocyanin biosynthesis in peaches
Source: PeerJ. 2025 Sep 4;13:e19975. doi: 10.7717/peerj.19975 (PMC12422263; doi:10.7717/peerj.19975)
Supplement: Supplemental Information 1 [file peerj-13-19975-s001.xls]

## Sheet: Sheet1
ITEM TO CHECK	IMPORTANCE	CHECKLIST
EXPERIMENTAL DESIGN
Definition of experimental and control groups	E	Experimental group：variegated petals (petals-V), red petals (petals-R), leaves, red sepals (sepals-R), green sepals (sepals-G), pistils, and stamens.(‘Sahong Tao’) Control group: PRII as the reference gene.	L254-L255，L267-L268
Number within each group	E	3	L254-L255，L267-L268
Assay carried out by core lab or investigator's lab?	D	The experiment was done independently.	L254-L255，L267-L268
Acknowledgement of authors' contributions	D
SAMPLE
Description	E	Red and variegated flower buds were collected during the initial balloon stage. The variegated petals (petals-V), red petals (petals-R), leaves, red sepals (sepals-R), green sepals (sepals-G), pistils, and stamens were collected individually into centrifuge tubes, immediately put in liquid nitrogen, transfer to -80 °C freezer for storage.	L158-L164
Volume/mass of sample processed	D	50 - 100 mg	L158-L164
Microdissection or macrodissection	E	Macro	L158-L164
Processing procedure	E	Liquid nitrogen flash freezing (from picking to freezing< 2 minutes)age.	L158-L164
If frozen - how and how quickly?	E	Store at -80°C for less than three months	L158-L164
If fixed - with what, how quickly?	E	NOT involved	L158-L164
Sample storage conditions and duration (especially for FFPE samples)	E	NOT involved	L158-L164
NUCLEIC ACID EXTRACTION
Procedure and/or instrumentation	E	After extracting the sample RNA, the RNA quality was detected using gel electrophoresis,synthesis of cDNA.	L254-L256
Name of kit and details of any modifications	E	The FastPure® Universal Plant Total RNA Isolation Kit (RC411, Vazyme, Nanjing, China).	L254
Source of additional reagents used	D
Details of DNase or RNAse treatment	E	Using RNase I, spray the lab table and equipment and let stand for ten minutes	L253-L267
Contamination assessment (DNA or RNA)	E	Agarose gel electrophoresis	L253-L267
Nucleic acid quantification	E	good	L253-L267
Instrument and method	E
Purity (A260/A280)	D	Use a small amount of RNA sample and perform gel electrophoresis after staining to observe its bands	L253-L267
Yield	D
RNA integrity method/instrument	E	Agarose gel electrophoresis	L253-L267
RIN/RQI or Cq of 3' and 5' transcripts	E	Not performed
Electrophoresis traces	D
Inhibition testing (Cq dilutions, spike or other)	E	Cq dilutions	L253-L267
REVERSE TRANSCRIPTION
Complete reaction conditions	E	The GoldenstarTM RT6 cDNA Synthesis Kit (TSK301S, Tsingke, Beijing, China)	L254-L255
Amount of RNA and reaction volume	E	4 μg total RNA, 20 μL reaction	L254-L255
Priming oligonucleotide (if using GSP) and concentration	E	Randomer（50 µM）	L254-L255
Reverse transcriptase and concentration	E	dNTP Mix（10 mM）	L254-L255
Temperature and time	E	Incubate at 25°C for 10 min, 50°C for 30 min, and 85°C for 5 min.	L254-L255
Manufacturer of reagents and catalogue numbers	D	The GoldenstarTM RT6 cDNA Synthesis Kit (TSK301S, Tsingke, Beijing, China)	L254-L255
Cqs with and without RT	D*
Storage conditions of cDNA	D	Store in the refrigerator at 4 °C	L254-L255
qPCR TARGET INFORMATION
If multiplex, efficiency and LOD of each assay.	E	Yes
Sequence accession number	E	MYB1R1:LOC18777189 LDOX:LOC18777055	L287-L288
Location of amplicon	D
Amplicon length	E	MYB1R1:176bp LDOX:215bp	See Table 1
In silico specificity screen (BLAST, etc)	E	Yes
Pseudogenes, retropseudogenes or other homologs?	D
Sequence alignment	D
Secondary structure analysis of amplicon	D
Location of each primer by exon or intron (if applicable)	E	Not applicable
What splice variants are targeted?	E	None
qPCR OLIGONUCLEOTIDES
Primer sequences	E	See Table 1
RTPrimerDB Identification Number	D	Not applicable
Probe sequences	D**	Not applicable
Location and identity of any modifications	E	None
Manufacturer of oligonucleotides	D
Purification method	D
qPCR PROTOCOL
Complete reaction conditions	E	The total reaction volume was 20 µL, comprising 10 µL of 2 × ChamQ Blue Universal SYBR qPCR Master Mix, 1 µL of cDNA template, 0.4 µL of forward primer, 0.4 µL of reverse primer, and ddH2O to reach a final volume of 20 µL.	L259-L261
Reaction volume and amount of cDNA/DNA	E	1 μl of cDNA prep in 20 μl total volumne	L259-L261
Primer, (probe), Mg++ and dNTP concentrations	E	0.4 μl of primer. (probe), Mg++ and dNTP concentrations were not added additional	L259-L261
Polymerase identity and concentration	E	20µL/rxn	L259-L261
Buffer/kit identity and manufacturer	E	Q312, Vazyme, Nanjing, China	L257-L259
Exact chemical constitution of the buffer	D
Additives (SYBR Green I, DMSO, etc.)	E	SYBR	L257-L259
Manufacturer of plates/tubes and catalog number	D	8-Tube qPCR Strip with Adapted Optical Flat Caps, White, Cuttable, 0.1 mL(AI02080)	L253-L267
Complete thermocycling parameters	E	page7/line253-267	L253-L267
Reaction setup (manual/robotic)	D	manual
Manufacturer of qPCR instrument	E	BIO-RAD, Hercules, California, USA	L253-L267
qPCR VALIDATION
Evidence of optimisation (from gradients)	D
Specificity (gel, sequence, melt, or digest)	E	Not performed
For SYBR Green I, Cq of the NTC	E	Not performed
Standard curves with slope and y-intercept	E	Not performed
PCR efficiency calculated from slope	E	Not performed
Confidence interval for PCR efficiency or standard error	D
r2 of standard curve	E	Not performed
Linear dynamic range	E	Not performed
Cq variation at lower limit	E	Not performed
Confidence intervals throughout range	D
Evidence for limit of detection	E	Not performed
If multiplex, efficiency and LOD of each assay.	E	Not performed
DATA ANALYSIS
qPCR analysis program (source, version)	E	Product sheet for the SupRealQ Purple Universal SYBR qPCR Master Mix	L259-L260
Cq method determination	E	2-∆∆Ct method	L267-L268
Outlier identification and disposition	E	None
Results of NTCs	E	Not performed
Justification of number and choice of reference genes	E	RPII	L266-L268
Description of normalisation method	E	Not performed
Number and concordance of biological replicates	D
Number and stage (RT or qPCR) of technical replicates	E	3	L381-L386
Repeatability (intra-assay variation)	E	within reason	L381-L386
Reproducibility (inter-assay variation, %CV)	D
Power analysis	D
Statistical methods for result significance	E	ANOVA	L381-L386
Software (source, version)	E	Graphpad Pism9.5	L381-L386
Cq or raw data submission using RDML	D
Table 1. MIQE checklist for authors, reviewers and editors. All essential information (E) must be submitted with the manuscript. Desirable
information (D) should be submitted if available. If using primers obtained from RTPrimerDB, information on qPCR target, oligonucleotides,
protocols and validation is available from that source.
*: Assessing the absence of DNA using a no RT assay is essential when first extracting RNA. Once the sample has been validated as
RDNA-free, inclusion of a no-RT control is desirable, but no longer essential.
**: Disclosure of the probe sequence is highly desirable and strongly encouraged. However, since not all commercial pre-designed assay
vendors provide this information, it cannot be an essential requirement. Use of such assays is advised against.
