# Supplementary material for: Screening of MYB1R1 interaction with LDOX promoter to regulate anthocyanin biosynthesis in peaches
Source: PeerJ. 2025 Sep 4;13:e19975. doi: 10.7717/peerj.19975 (PMC12422263; doi:10.7717/peerj.19975)
Supplement: Supplemental Information 2 — The blue font represents the reference gene RPII. [file peerj-13-19975-s002.xlsx]

## Sheet: Sheet1
Raw RT-qPCR data
ID	petals-V		petals-R		leaves		sepals-R		sepals-G		pistil		stamen
LDOX	30.71	33.03	29.2	27.91	28.37	25.95	30.33	NoCt	27.49	NoCt	28.8	25.99	28.39	24.56
	32.27	32.68	29.67	28.21	28.31	25.95	30.63	NoCt	27.55	NoCt	28.48	27.31	27.53	24.61
	34.27	33.31	29.28	28.51	28.07	25.66	31.88	NoCt	28.51	NoCt	27.89	27.6	27.99	24.58
MYB1R1	29.58	29.59	28.08	30.21	27.24	27.75	25.36	36.47	27.23	35.28	27.69	30.5	26.28	27.45
	29.37	29.6	27.76	30.1	27.75	27.6	25.06	34.36	26.75	37.68	27.85	30.38	25.64	27.54
	30.96	30.07	27.31	30.25	26.01	27.77	26.33	34.94	27.8	37.22	27.29	30.37	26.94	27.49
