# Supplementary material for: Screening of MYB1R1 interaction with LDOX promoter to regulate anthocyanin biosynthesis in peaches
Source: PeerJ. 2025 Sep 4;13:e19975. doi: 10.7717/peerj.19975 (PMC12422263; doi:10.7717/peerj.19975)
Supplement: Supplemental Information 3 — Gene ID: The gene identifier for the analyzed species; CDS: The nucleotide sequence of the gene in the analyzed species; Protein: The encoded protein sequence of the gene in the analyzed species; Read count: The number of high-throughput sequencing reads supporting the gene in the analyzed species, generally, a larger number indicates a higher likelihood of the gene being an interacting protein; A. thaliana homolog: The homolog gene ID in the model plant Arabidopsis thaliana, identified through BLAST comparison; e-value: The E-value of the BLAST comparison between this gene and its Arabidopsis thaliana homolog, with a smaller value indicating a higher similarity; A. thaliana gene symbol: The abbreviation or symbol for the Arabidopsis thaliana homolog gene; Functional annotation: The functional annotation of the gene in the analyzed species; TF/Kinase: Whether the gene in the analyzed species is a TF or a kinase. [file peerj-13-19975-s003.xlsx]

## Sheet: Sheet1
Gene ID	pattern name	CDS	Protein	Read count	A.thaliana homolog	e-value	A.thaliana gene symbol	Functional annotation	TF/Kinase	Monoclonal sequencing corresponds to the serial number	Peach genome
LOC109949776	PRUPE_6G276200	ATGGCCACCACCGCAGGCGCCGCCGCTACATCCTCATTCATCGGAACACGATTTCCGGACGTGTACTCGAACTCGGGTCGGGTCCAGGCCCGGTTCGGATTCGGGACCAAGAAACCCAAGAAGGCCTCGAAGTCCACTTTCTCTACTGACCGCCCACTTTGGTACCCGGGAGCCAAGGCCCCGGAATGGCTGGACGGGAGCTTGGTTGGCGACTACGGGTTCGACCCGTTCGGGTTGGGCAAACCCGCGGAGTATCTCCAGTACGACTACGACGGGCTGGACCAGAACCTGGCCAAGAACTTGGCGGGTGATGTTATCGGGACCCGAACCGAAACCGCGGACGTCCAGTCGACGCCGTTTCAGCCATACAATGAAGTGTTTGGGTTGCAGAGGTTTCGC…	MATTAGAAATSSFIGTRFPDVYSNSGRVQARFGFGTKKPKKASKSTFSTDRPLWYPGAKAPEWLDGSLVGDYGFDPFGLGKPAEYLQYDYDGLDQNLAKNLAGDVIGTRTETADVQSTPFQPYNEVFGLQRFRECELIHGRWAMLATLGALTVESVTGITWQDAGKVELIEGSSYLGQPLPFSITTLIWIEVLVIGYIEFQRNAELDPEKRLYPGGKFFDPLGLASDPEKKATLQLAEIKHARLAMIGFLGFAVQAAVTGKGPLNNWATHLSDPLHTTIIDAFTSS	2330.69	AT3G08940.2	7e-169	LHCB4.2	light harvesting complex photosystem II		g2202237064S415589-PHIS2-LDOX-2-88_T7.seq	chlorophyll a-b binding protein CP29.1, chloroplastic
LOC18767296	PRUPE_8G166300	ATGGCCGATTACACGCCGTTACTAAACGGAGTAGACCATCCGGCGACCATCTGCGCGAAACCTCCACGTATCGCCTCTCTCGATGTCTTTCGCGGCCTATGCGTCTTCCTGATGATGCTAGTTGATTATGGCGGCTCAATTTTTCCGATAATCGCTCACTCTCCGTGGAACGGTCTCCATTTGGCAGACTTTGTTATGCCTTTCTTTCTATTCATTGCTGGAGTTTCTCTTGCTCTTGTCTACAAGAAGGTGACAAACAGAGCAGAAGCTACATGGAAAGCGGTGTTTAAGGCCCTAAAACTTTTTCTTCTAGGCGTTCTGCTTCAAGGTGGTTATTTCCATGGAGTAACTTCCTTGACTTTTGGAGTTGACATTGAAAGAATACGGTGGTTTGGAATT…	MADYTPLLNGVDHPATICAKPPRIASLDVFRGLCVFLMMLVDYGGSIFPIIAHSPWNGLHLADFVMPFFLFIAGVSLALVYKKVTNRAEATWKAVFKALKLFLLGVLLQGGYFHGVTSLTFGVDIERIRWFGILQRIALGYIVAALCEIWLSRQTWDEVGFFKSYYWHWCVIFSLSAIYAGLLYGLYVPDWEFKALTPTSMRPSSDSFVYLVKCSVRGDLGPACNSAGMIDRFILGVDHLYLKPVYRNLKECNLSADGEVPESSPSWCHAPFDPEGILSSLTAAVTCIIGLQYGHILAHIEDHKGRLNAWSLFSVSIFVLGSFLAFIGIPVNKSLYTISYMLITSASAGITFCALYLLIDVYGYRCITSVLEWMGIHSLSIFVLVTSNLAIIAIQGLYW…	613.407	AT4G35100.2	5e-171	PIP3	plasma membrane intrinsic protein 3		g2202237057S415589-PHIS2-LDOX-2-81_T7.seq	uncharacterized
LOC18768163	PRUPE_8G142700	ATGGCTTCCAACACTTTGATGAGCTGTGGCATCGCCACCACAGCCTTCCCTTCAGTCCTCTCATCCTCCAAGTCTAAATTTGCCACCAGTGCAGTCCAGCTCCCCAGTGTTGGTGCCAATGCCTCCTCCAGGTTCTCCATGTCCGCTGATTGGATGCCCGGCCAGCCGAGACCTCCTTATCTAGACGGCTCTGCACCCGGTGACTTTGGATTTGACCCACTTCGGCTAGGAGAAGTGCCAGAAAACTTGGAGAGGTTCAAGGAGTCTGAGCTCATTCACTGCAGATGGGCTATGCTTGCTGTTCCAGGGATTCTAGTACCAGAGGCTTTGGGATTGGGCAACTGGGTAAAGGCACAAGAGTGGGCTGCCGTTCCAGGAGGCCAAGCCACCTACTTAGGC…	MASNTLMSCGIATTAFPSVLSSSKSKFATSAVQLPSVGANASSRFSMSADWMPGQPRPPYLDGSAPGDFGFDPLRLGEVPENLERFKESELIHCRWAMLAVPGILVPEALGLGNWVKAQEWAAVPGGQATYLGNPVPWGTLPTILVIEFLSIAFVEHQRSMEKDPEKKKYPGGAFDPLGYSKDPKKFEEYKVKEIKNGRLALLAFVGFVVQQSAYPGTGPLENLATHLADPWHNNIGDVIIPKGILP	1094.83	AT3G54890.1	1e-143	LHCA1	photosystem I light harvesting complex gene 1		g2202237064S415589-PHIS2-LDOX-2-88_T7.seq	chlorophyll a-b binding protein 6, chloroplastic
LOC18768561	PRUPE_8G107100	ATGGGACGAAGACCAGCCAGGTGCTACCGCCAGATCAAGAACAAACCCTACCCGAAATCGCGTTTTTGCCGTGGTGTTCCGGATCCGAAGATCCGAATCTACGATGTGGGCATGAAGAAGAAGGGCGTGGATGAGTTTCCTTTCTGCATCCACCTCGTTTCTTGGGAGAAAGAAAACGTTTCGAGCGAAGCCCTCGAGGCCGCCCGTATTGCCTGCAACAAGTACATGACTAAGTTCGCCGGAAAGGACACGTTTCATTTGCGAGTTAGGGTTCATCCTTTCCATGTTCTCAGGATCAACAAGATGCTTTCTTGCGCCGGAGCCGATAGGCTTCAGACTGGTATGCGAGGTGCTTTTGGGAAGCCCCTCGGTACTTGTGCTAGGGTTGCTATTGGTCAG…	MGRRPARCYRQIKNKPYPKSRFCRGVPDPKIRIYDVGMKKKGVDEFPFCIHLVSWEKENVSSEALEAARIACNKYMTKFAGKDTFHLRVRVHPFHVLRINKMLSCAGADRLQTGMRGAFGKPLGTCARVAIGQVLLSVRCKDSNKHHAHEALRRSKFKFPGRQKIIESRKWGFTKFSRADYVRLKAENRIVPDGVNAKLLGCHGSLALRRPGGAFIDAAVN	1121.14	AT1G26910.1	3e-141	RPL10B	Ribosomal protein L16p/L10e family protein		g2202237068S415589-PHIS2-LDOX-2-92_T7.seq	60S ribosomal protein L10
LOC18769127	PRUPE_7G177900	ATGGGAAAGGTTCATGGATCTTTGGCTCGTGCTGGTAAGGTGAGAGGCCAAACTCCCAAAGTGGCTAAGCAAGATAAGAAGAAGAAGCCCCGTGGACGAGCCCACAAGCGCATGCAATACAACCGCCGATTCGTCACCGCTGTGGTTGGCTTCGGCAAGAAGAGGGGACCCAACTCATCTGAGAAGTAG	MGKVHGSLARAGKVRGQTPKVAKQDKKKKPRGRAHKRMQYNRRFVTAVVGFGKKRGPNSSEK	518.165	AT5G56670.1	7e-29		Ribosomal protein S30 family protein		g2202237066S415589-PHIS2-LDOX-2-90_T7.seq	40S ribosomal protein S30
LOC18769499	PRUPE_7G125900	ATGCCGATCCGGAACATTGCCGTTGGCCGACCCGAGGAGGCGTACCACCCGGACGCCTTGAGGGCGGGTCTCGCCGAGTTCATTTCCACGCTGATCTTCGTCTTCGCCGGCGAGGGCTCCGGCATGGCCTTCGCCAAGCTCACCCACGGGGCCGCGACCACGCCAGCAGGCCTCGTCGCCGCCGCTCTAGCCCACGGATTCGGCCTCTTCGTCGCCGTCTCCGTCAGTGCGAACATCTCCGGCGGACACGTCAACCCCGCGGTCACTTTCGGCGCCTTCGTCGGCGGCAATATCTCCCTCCTCCGCGGCATCCTCTATTGGATCGCCCAGCTCCTCGGGTCCGCCGTCGCGTGCGGTCTCCTCAGGTTCGCAACCAACTACCAGACTACCTCAGCATTT…	MPIRNIAVGRPEEAYHPDALRAGLAEFISTLIFVFAGEGSGMAFAKLTHGAATTPAGLVAAALAHGFGLFVAVSVSANISGGHVNPAVTFGAFVGGNISLLRGILYWIAQLLGSAVACGLLRFATNYQTTSAFALSEGVGVWNAFVFEIVMTFGLVYTVYATAIDPKRGSVGTIAPIAIGFVVGANILAGGAFDGASMNPAVSFGPALVSWNWHNHWIYWAGPLIGGGLAGLIYEFVFIGNSSHEPLPTADY	1892.51	AT2G36830.1	1e-140	GAMMA-TIP, TIP1;1, GAMMA-TIP1	gamma tonoplast intrinsic protein		g2202237057S415589-PHIS2-LDOX-2-81_T7.seq	aquaporin TIP1-1
LOC18769795	PRUPE_7G237800	ATGGCTTTGCCAAACCAGCAGACTGTTGATTATCCAAGCTTTAAGCTTGTCATCGTCGGCGATGGAGGCACTGGAAAAACCACTTTTGTGAAGAGGCATCTCACTGGAGAGTTTGAGAAGAAATATGAACCAACCATTGGTGTGGAGGTTCATCCTTTGGATTTCTTCACAAATTGCGGAAAGATCCGCTTTTACTGCTGGGATACTGCTGGGCAAGAGAAGTTTGGTGGTCTTCGGGATGGCTACTACATTCACGGGCAATGTGCAATCATTATGTTTGACGTCACAGCTAGGTTGACATACAAGAATGTTCCTACATGGCACCGTGATCTCTGTCGGGTCTGTGAGAACATACCCATTGTTCTCTGCGGAAACAAGGTTGATGTGAAGAACAGGCAG…	MALPNQQTVDYPSFKLVIVGDGGTGKTTFVKRHLTGEFEKKYEPTIGVEVHPLDFFTNCGKIRFYCWDTAGQEKFGGLRDGYYIHGQCAIIMFDVTARLTYKNVPTWHRDLCRVCENIPIVLCGNKVDVKNRQVKAKQVTFHRKKNLQYYEISAKSNYNFEKPFLYLARKLAGDTNLHFVESPALAPPEVHIDLAAQQQHEAELAQAANQPLPDDDDDAFE	572.555	AT5G55190.1	6e-164	RAN3, ATRAN3	RAN GTPase 3		g2202237049S415589-PHIS2-LDOX-2-73_T7.seq	GTP-binding nuclear protein Ran-3
LOC18770366	PRUPE_7G168300	ATGGCTCCTGCTACTACTCTCACCTCCATAGCAGGGGAGAAAACCCTGCAACAAAAATTTGTCCGGGACGAAGATGAGCGCCCCAAGGTTGCCTACAACAACTTCAGCAATGAAATCCCGATCATTTCGCTTGCCGGGATCGACGAGGTGGAAGGCCGCCGGGCTGATATTTGCAAGAAGATTGTGGAGGCTTGTGAGGATTGGGGTATTTTCCAGATTGTTGATCATGGAGTTGATACCAAGCTCATCTCGGAAATGACCGGTCTCGCCAGAGAGTTCTTCGCTCTGCCCTCGGAGGAGAAGCTTCGTTTTGACATGTCCGGCGGCAAAAAGGGTGGTTTCATCGTCTCCAGCCATTTACAGGGAGAAGCTGTGCAAGATTGGCGCGAAATTGTGACA…	MAPATTLTSIAGEKTLQQKFVRDEDERPKVAYNNFSNEIPIISLAGIDEVEGRRADICKKIVEACEDWGIFQIVDHGVDTKLISEMTGLAREFFALPSEEKLRFDMSGGKKGGFIVSSHLQGEAVQDWREIVTYFSYPIRHRDYSRWPDKPEGWREVTQKYSDELMGLACKLLGVLSEAMGLDTEALTKACVDMDQKVVVNFYPKCPQPDLTLGLKRHTDPGTITLLLQDQVGGLQATRDDGKTWITVQPVEGAFVVNLGDHGHFLSNGRFKNADHQAVVNSNSSRLSIATFQNPAQEATVYPLSIREGEKPILEGPITYTEMYKKKMTKDLELARLKKLAKEQQLQDSEKEGKPKDDIFA	480.518	AT3G51240.1	0	F3H, TT6, F3'H	flavanone 3-hydroxylase		g2202237001S415589-PHIS2-LDOX-2-25_T7.seq	naringenin,2-oxoglutarate 3-dioxygenase
LOC18770737	PRUPE_7G262400	ATGTCTGACGAGGAGCACCAGTTCGAATCCAAGGCCGATGCTGGGGCTTCCAAGACCTACCCTCAGCAGGCTGGTACCATTCGCAAGAATGGTTACATAGTCATCAAGGCCAGGCCTTGCAAGGTTGTTGAAGTCTCCACTTCAAAAACTGGCAAGCACGGTCATGCAAAGTGCCACTTTGTTGCAATTGATATTTTTAATGGAAAGAAACTTGAAGATATTGTTCCTTCATCCCACAACTGTGATGTTCCTCATGTCAACCGTACTGACTACCAGCTGATTGATATCTCTGAAGATGGTTTTGTGAGTCTTTTAACTGAAAATGGAAACACCAAGGATGATCTGAGGCTTCCCACCGATGAAAGTCTGCTTAGCCAGATTAAAGATGGGTTTGCTGAT…	MSDEEHQFESKADAGASKTYPQQAGTIRKNGYIVIKARPCKVVEVSTSKTGKHGHAKCHFVAIDIFNGKKLEDIVPSSHNCDVPHVNRTDYQLIDISEDGFVSLLTENGNTKDDLRLPTDESLLSQIKDGFADGKDLVVTVMSAMGEEQICALKDIGPKN	664.88	AT1G13950.1	9e-101	EIF-5A, ELF5A-1, ATELF5A-1, EIF5A	eukaryotic elongation factor 5A-1		g2202236986S415589-PHIS2-LDOX-2-10_T7.seq	eukaryotic translation initiation factor 5A-2
LOC18770894	PRUPE_7G166400	ATGTCAGCCACAGAAGTTGTTCAGGCTCCGGCCGTTGAGGCCCCGCCGGCGGTGGAGGCTCCAGCGATGGAGGAGCCCAAAAAAGAAGAAAAGCCGGTCAAAGAGAGAAAGACGAGAACCCCAAGGGAGAAGAAGCCTAAAGAGCCCAAAACCGCTGCTCATCCTCCATACTTTCAGATGATAAAGGAGGCACTGTTGTCTCTGAACGAGAAGAGCGGGTCCAGTCCTTACGCCATAGCCAAGTACATGGAGGAGAAGCACAAGGCGGTGCTTCCTTCCAACTTCAAGAAGACCCTGGCTCTGCAACTGAAGAACTCTGCGGCGAGAGGCAAGCTGATCAAGATCAGGGCCTCGTACAAGCTCTCTGAGGCAGGCAAGAAGGACAAAACCACAGGCAAA…	MSATEVVQAPAVEAPPAVEAPAMEEPKKEEKPVKERKTRTPREKKPKEPKTAAHPPYFQMIKEALLSLNEKSGSSPYAIAKYMEEKHKAVLPSNFKKTLALQLKNSAARGKLIKIRASYKLSEAGKKDKTTGKTKASTKPKTEKKTKTTAPAPKATKKPAKKNKKSTASKPKQPKSIKSPAAKKPKKAVA	1083.55	AT2G18050.1	1e-42	HIS1-3	histone H1-3		g2202237019S415589-PHIS2-LDOX-2-43_T7.seq	histone H1
LOC18771823	PRUPE_7G188800	ATGGGTGAGGGTGAAGATTGCATGACCATCCCAGTGATTGATATGCAAAAGTTTCCAGATGCAGAAGAGTACAAGAAACTGAGGGAAGCATCTGAGATATGGGGCTGCTTCAGGCTTATCAACCACAAGATCCCATTGGCTCTTATGAAGGAGATGAAGGCTGTGGTCAGATCCCTGCTTGACCTGCCCATGGAGATCAAGCAGCAGAACAAGGATGTCATAGCTGGTAGTGGCTACATGGCACCCAGCAAAGTCAACCCTCTTTATGAGGCTCTGGGTCTTTATGACTTGGGCTCACCTGAGGCTGTGCATACTTTTTGCTCTAAGTTGGATGCCTCTTCCCATCAGAGAGAGATAATATCGAAGTATGCTCAAGCAGTGTATGATCAGATTGTGGAA…	MGEGEDCMTIPVIDMQKFPDAEEYKKLREASEIWGCFRLINHKIPLALMKEMKAVVRSLLDLPMEIKQQNKDVIAGSGYMAPSKVNPLYEALGLYDLGSPEAVHTFCSKLDASSHQREIISKYAQAVYDQIVEIGHKLAESLGLVNVDFLKGWPCQFRINKYNFKPESVGSSGVQIHTDSGFLTILQDDENVGGLEVMDKAGAFVPVDPCPGTLLVNLGDVAQAWSNGRLCNVRHRVQCREATIRVSIATFLLGPKDQEAVEAPPEFVDSEHPRLYVPFTYEDYRKLRLSSKLQAGEALAVLRTTPS	203.066	AT1G14130.1	2e-134		2-oxoglutarate (2OG) and Fe(II)-dependent oxygenase superfamily protein		g2202237001S415589-PHIS2-LDOX-2-25_T7.seq	2-oxoglutarate-dependent dioxygenase DAO
LOC18772365	PRUPE_6G249800	ATGGCTGCTCCACCTGCTAGAGCTCGAGCCGATTACGACTATCTCATAAAGCTCCTCCTGATCGGCGACAGCGGTGTGGGTAAGAGTTGCCTTCTTCTGCGTTTCTCAGATGGGTCCTTTACAACTAGTTTTATTACAACCATTGGTATTGACTTCAAGATAAGGACCATAGAGCTTGATGGGAAACGAATTAAGTTGCAAATTTGGGATACCGCTGGTCAAGAACGGTTTCGGACAATTACAACTGCTTACTACCGTGGAGCCATGGGCATTTTGCTCGTGTATGATGTCACTGATGAGTCATCTTTTAACAACATTAGGAATTGGATTCGTAACATAGAACAGCATGCTTCTGACAATGTCAACAAGATCCTGGTGGGTAACAAGGCTGACATGGAT…	MAAPPARARADYDYLIKLLLIGDSGVGKSCLLLRFSDGSFTTSFITTIGIDFKIRTIELDGKRIKLQIWDTAGQERFRTITTAYYRGAMGILLVYDVTDESSFNNIRNWIRNIEQHASDNVNKILVGNKADMDESKRAVPTSKGQALADEYGIKFFETSAKTNLNVEEVFFSIARDIKQRLADTDSRAEPQTIKINQPDQGAGAAQAAQKSACCGS	209.476	AT3G53610.3	2e-145	ATRAB8, RAB8	RAB GTPase homolog 8		g2202237049S415589-PHIS2-LDOX-2-73_T7.seq	ras-related protein RABE1a
LOC18772795	PRUPE_6G284800	ATGCCGTGCCTTAACATCTCAGCTAACGTCAGCCTGGAAGGAGTAGACACCTCCTCTATCCTCTCCGAAGCCACCTCCACCGTCGCCAAGATCATCAGCAAGCCCGAGGCCTATGTGATGATTGTGCTGAAGGGATCAGTACCCATAGCTTTTGGTGGGACTGAGCAGCCAGCTGCCTATGGTGAGTTGGTCTCCATTGGTGGCCTTAACCCTGATGTGAACAAGAAGTTGAGTGCTGCAATTGCCGCAATTCTTGAGACTAAGTTGTCTGTGCCCAAGTCACGATTTTTCCTCAAGTTCTATGACACCAAGGGTTCCAACTTTGGATGGAACGGGTCTACCTTCTAA	MPCLNISANVSLEGVDTSSILSEATSTVAKIISKPEAYVMIVLKGSVPIAFGGTEQPAAYGELVSIGGLNPDVNKKLSAAIAAILETKLSVPKSRFFLKFYDTKGSNFGWNGSTF	712.812	AT5G01650.1	7e-68		Tautomerase/MIF superfamily protein		g2202237025S415589-PHIS2-LDOX-2-49_T7.seq	macrophage migration inhibitory factor homolog
LOC18773002	PRUPE_6G345300	ATGACTGAAACTGACGTCAAGGGCAAGAAGGCAAGATCGCCACCTTCTCACCCTCCTTTTGTCGAGATGATTACGGAGGCGATTGTGGCGCTGAAGGAGAGGACAGGGTCGAGCCAGTACGCGATCACCAAGTTCGTCGAGGAAAAGAACAAGAATTTGCCTCAGACCTTCAGGAAGCTCCTGCTCTACAATTTGAAGAAGCTTGTGGCTTCTGGTAAGCTCGTCAAGGTTAAGAACTCATTCAAGCTCCCTCCTGGTCGCTCGGCTCCGGTGAAAGAAAAGCCAGACGCGCCCAAGCCTAAAAAGTCGGCTGAGGCGGTTGTCAAGCCTAGGCCGAAGCCGAAAACGGTTGCTAAGCCCAAGGCCAATGTCGCGGCTAAGCCTAAGCCCAAAGCGGCT…	MTETDVKGKKARSPPSHPPFVEMITEAIVALKERTGSSQYAITKFVEEKNKNLPQTFRKLLLYNLKKLVASGKLVKVKNSFKLPPGRSAPVKEKPDAPKPKKSAEAVVKPRPKPKTVAKPKANVAAKPKPKAAAKPKLKAVAAKPKAAVKPKAKPAAAKPAAKVARTSTRTSPGKKVEVKAKAKKPVAPARAVKKPKSVKSPVKKKAQAKKGKK	286.636	AT2G30620.1	5e-37		winged-helix DNA-binding transcription factor family protein		g2202237019S415589-PHIS2-LDOX-2-43_T7.seq	histone H1
LOC18773103	PRUPE_6G068000	ATGGCGAGTAGAGTAGACCACGAGTACGACTATCTGTTCAAGATCGTATTGATCGGTGACTCTGGTGTGGGCAAATCTAACATTCTCTCTAGGTTTACCAGAAATGAGTTCTGCTTGGAATCTAAGTCAACTATCGGCGTCGAGTTCGCTACCAGAACTCTCCAGGTTGAAGGAAAGACTGTGAAGGCACAGATCTGGGATACAGCAGGTCAGGAGCGATACCGTGCTATCACCAGTGCTTACTATAGAGGGGCAGTGGGTGCTCTCCTTGTCTATGACATAACTAAGCGGCCAACTTTTGAAAATGTCCAAAGGTGGCTCCGTGAATTGAGGGACCATGCAGATTCGAACATTGTTATCATGATGACAGGAAACAAGTCTGACTTGAACCATCTTAGA…	MASRVDHEYDYLFKIVLIGDSGVGKSNILSRFTRNEFCLESKSTIGVEFATRTLQVEGKTVKAQIWDTAGQERYRAITSAYYRGAVGALLVYDITKRPTFENVQRWLRELRDHADSNIVIMMTGNKSDLNHLRSVSEDDGQTLAEREGLSFLETSALEATNVEKAFQTILTEIYHIVSKKALAAQEAVSTTLPGQGTTINVSDASGNNNKRGCCST	201.057	AT1G07410.1	9e-141	ATRABA2B, RAB-A2B, ATRAB-A2B, RABA2b	RAB GTPase homolog A2B		g2202237049S415589-PHIS2-LDOX-2-73_T7.seq	ras-related protein Rab2BV
LOC18773355	PRUPE_6G039000	ATGGGACGAAGGCCAGCCAGGTGCTATCGCCAGATCAAGAACAAACCCTACCCGAAATCCCGTTTCTGCCGTGGTGTTCCGGACCCTAAGATCCGAATCTACGATGTGGGTATGAAGAAGAAGGGCGTGGATGAGTTTCCCTTCTGCATCCACCTCGTTTCTTGGGAGAAAGAAAATGTTTCGAGCGAAGCTCTCGAGGCCGCTCGTATCGCCTGCAACAAGTACATGGCCAAGTTCGCCGGAAAGGACACCTTTCATTTGCGAGTTAGGGTTCACCCCTTCCATGTTCTCAGGATCAACAAAATGCTTTCTTGTGCCGGAGCCGATAGGCTTCAGACTGGTATGAGAGGTGCTTTTGGGAAGCCCCTGGGTACTTGCGCTAGGGTTGATATTGGTCAG…	MGRRPARCYRQIKNKPYPKSRFCRGVPDPKIRIYDVGMKKKGVDEFPFCIHLVSWEKENVSSEALEAARIACNKYMAKFAGKDTFHLRVRVHPFHVLRINKMLSCAGADRLQTGMRGAFGKPLGTCARVDIGQVLLSVRCKDSNKNHAHEALRRAKFKFPGRQKIIESRKWGFTKFSRADYVRLKAEHRIVPDGVNAKLLGCHGSLALRRPGGAFIDAAVN	839.866	AT1G26910.1	2e-139	RPL10B	Ribosomal protein L16p/L10e family protein		g2202237068S415589-PHIS2-LDOX-2-92_T7.seq	60S ribosomal protein L10
LOC18773648	PRUPE_6G130100	ATGTCAACCATGACAACTGTGCAAATTCCATCCCAATGCATGTTCAGACATGCACCCCAGAATCGTTTCACCAGTTCTATCGTTAAGTTATCATCTCCTCTTGGATCTGTGAAGAATATCTCCAAGGCCTTTGGCTTGAAAGCATCCTCCAACTTCCGAGCATCAATGGCAGTATACAAGGTCAAGCTGGTTGGACCAGACGGTGCGGAGTGCGAGTTTGATGCTCCAGATGATGCGTACATCTTAGATTCAGCTGAGAATGCAGGAGTTGAGTTGCCATATTCTTGCAGGGCTGGGGCCTGCTCTACCTGTGCAGGGAAGCTGGTGGCAGGTTCAGTGGACCAGTCCGATGGCTCGTTCCTCGATGACAATCAAATGAAGGAGGGTTATGTGCTGACC…	MSTMTTVQIPSQCMFRHAPQNRFTSSIVKLSSPLGSVKNISKAFGLKASSNFRASMAVYKVKLVGPDGAECEFDAPDDAYILDSAENAGVELPYSCRAGACSTCAGKLVAGSVDQSDGSFLDDNQMKEGYVLTCVAYPTSDAVIHTHKESELY	884.688	AT2G27510.1	2e-60	ATFD3, FD3	ferredoxin 3		g2202237000S415589-PHIS2-LDOX-2-24_T7.seq	ferredoxin, root R-B1
LOC18774122	PRUPE_6G191600	ATGGCGAGTGGAGGAGGATATGGAGACTCGAACCAGAAGATAGACTATGTGTTCAAGGTGGTGCTGATAGGGGACTCTGCAGTGGGCAAGTCTCAGATTCTGGCCAGGTTTGCTAGAAACGAGTTTAGCTTGGATTCTAAGGCCACCATCGGCGTTGAGTTTCAGACCAGGACCCTTATCATCGAGCACAAGAGTGTTAAAGCTCAGATCTGGGACACTGCTGGCCAAGAACGATATAGAGCAGTTACAAGTGCATACTACAGGGGCGCTGTTGGGGCAATGCTCGTCTATGATATAACCAAACGCCAGAGCTTTGATCACATACCCCGTTGGTTGGAAGAGCTGCGTAGCCACGCCGACAAGAACATTGTCATCATTCTGATAGGCAACAAAAGTGAT…	MASGGGYGDSNQKIDYVFKVVLIGDSAVGKSQILARFARNEFSLDSKATIGVEFQTRTLIIEHKSVKAQIWDTAGQERYRAVTSAYYRGAVGAMLVYDITKRQSFDHIPRWLEELRSHADKNIVIILIGNKSDLENQRVIPTEDAKEFAQKEGLFFLETSALESTNVESAFLTVLTEIFNIVNKKSLAASENQANGNPASLSGKKIVIPGPAQEIPAKSKVCCTS	230.476	AT5G65270.1	3e-145	AtRABA4a, RABA4a	RAB GTPase homolog A4A		g2202237049S415589-PHIS2-LDOX-2-73_T7.seq	ras-related protein Rab11A
LOC18774151	PRUPE_6G290000	ATGGATGTGAGAGTTGGGGTCTTAGTTCTTTTTGTGCTGGGAGCTAGTTGGGCCGGTGATGCTAGACAACTGGCAAACCTAAATTTACCAGTTACAAAGACAGCCCACCATATTCAAGTGGTGGAAACTCAAACTTTACAAGTTTCTGGGGATGAATTTGTTGGGAATGATAATGTGTGCACATTGTGTGAGGAGTTTGCTGCCCAGGCACTTGATTACCTTAGTGAAAACAAGACCCAGACCGAGATCATTGAAGCCCTACATCAGACCTGCTATCAATTGGGCTCTTTCAAGCAGCAGTGTATCACTTTGGTGGACTATTATGCTCCTCTCTTCTTCTTGGAGGTCTCCTCTCTACAACCTAGTGAGTTCTGCCGGAAGGTCAACCTCTGTCAGCAG…	MDVRVGVLVLFVLGASWAGDARQLANLNLPVTKTAHHIQVVETQTLQVSGDEFVGNDNVCTLCEEFAAQALDYLSENKTQTEIIEALHQTCYQLGSFKQQCITLVDYYAPLFFLEVSSLQPSEFCRKVNLCQQVALFSSQLREDSCGLCHRAVSEVLVKLKDPDTQLEIIELLLKACNSVENYAKKCKRIVFEYGPLFLANAEQFLETTDICTTLHACNSSVASTEEASPVTVVTVLSDSKSRQQRDTGMMEE	382.835	AT3G51730.1	1e-71		saposin B domain-containing protein		g2202237041S415589-PHIS2-LDOX-2-65_T7.seq	prosaposin
LOC18774233	PRUPE_6G054800	ATGTGTGGAATTCTTGCTGTTCTTGGTTGCTCTGATGACTCTCAGGCCAAGAGGGTCCGAGTCCTTGAGCTTTCTCGCAGATTGAAGCATCGTGGCCCTGATTGGAGTGGTCTTTACCAGCATGGAGATTGTTTCTTGGCTCATCAGAGGCTGGCCATCATTGACCCTGCTTCTGGGGATCAACCTCTGTACAATGAAGACAAGTCAATTGTTGTCACGGTGAATGGAGAGATTTACAACCATGAAGAGTTGAGGAAGCGTCTGCCGAATCACAAGTTCAGAACTGGCAGTGATTGTGATGTCATTGCTCATCTGTATGAAGAGTATGGGGAGAATTTTGTGGATATGCTGGATGGAATGTTTTCTTTTGTGCTACTGGATACCCGCGACAACAGCTTC…	MCGILAVLGCSDDSQAKRVRVLELSRRLKHRGPDWSGLYQHGDCFLAHQRLAIIDPASGDQPLYNEDKSIVVTVNGEIYNHEELRKRLPNHKFRTGSDCDVIAHLYEEYGENFVDMLDGMFSFVLLDTRDNSFIVARDAIGITSLYIGWSLDGSVWIASELKGLNDDCEHFESFPPGHLYSSKEGALKRWYNPTWFSEAIPSAPYDPLALRSAFETAVIKRLMTDVPFGVLLSGGLDSSLVASITARHLAGTKAAKQWGAQLHSFCVGLEGSPDLKAAKEVADYLGTVHHEFHFTVQDGIDAIEDVIYHIETYDVTTIRASTPMFLMSRKIKSLGVKMVISGEGSDEIFGGYLYFHKAPNKEEFHRETCRKIKALHQYDCLRANKSTSAWGLEARVPFL…	594.99	AT3G47340.1	0	ASN1, DIN6, AT-ASN1	glutamine-dependent asparagine synthase 1		g2202236993S415589-PHIS2-LDOX-2-17_T7.seq	asparagine synthetase [glutamine-hydrolyzing]
LOC18774381	PRUPE_6G083700	ATGGCTGCTCCACCGGCAAGGGCTAGAGCCGATTACGATTACCTCATAAAGCTTCTATTGATCGGCGACAGCGGTGTTGGTAAGAGTTGCCTTCTTTTGCGCTTCTCAGATGGTTCCTTCACAACTAGTTTCATCACAACCATTGGCATTGATTTCAAGATAAGGACTATTGAGCTTGATGGAAAACGAATTAAGCTCCAAATTTGGGATACAGCTGGTCAGGAGCGGTTCCGTACAATCACCACTGCTTACTATCGTGGAGCCATGGGCATTTTGCTGGTCTATGATGTTACCGATGAATCATCTTTCAATAACATAAGGAATTGGATTCGCAACATTGAACAGCATGCATCAGACAACGTTAACAAAATACTCGTAGGGAACAAGGCTGACATGGAC…	MAAPPARARADYDYLIKLLLIGDSGVGKSCLLLRFSDGSFTTSFITTIGIDFKIRTIELDGKRIKLQIWDTAGQERFRTITTAYYRGAMGILLVYDVTDESSFNNIRNWIRNIEQHASDNVNKILVGNKADMDESKRAVPTSKGQALADEYGIKFFETSAKTNLNVEQVFFSIARDIKQRLADTDTRAEPTTIKINQPDQGAGAGQAAQRSACCGS	308.689	AT5G59840.1	9e-145		Ras-related small GTP-binding family protein		g2202237049S415589-PHIS2-LDOX-2-73_T7.seq	ras-related protein RABE1c
LOC18774632	PRUPE_6G091600	ATGGGGAAGAGCTACCCTACCGTGAGCGAAGAGTACAAGAAGGCCATCGACAAGGCCAAGAGGAAGCTCAGAGGCTTCATCGCCGAGAAGGCCTGCGCTCCACTCATGCTTCGTATCGCATGGCATTCTGCTGGTACCTACGATTCGAGAACAAAAACCGGAGGCCCATTCGGAACTATGAAGCACGCAGCTGAGCAATCGCACGGGGCCAACGCTGGTCTCGATATCGCTGTCAGGCTCTTGGAGCCCATCAAGCAACAGTTCCCAATTCTCTCTTACGCTGACTTCTATCAGTTGGCTGGTGTTGTTGCTGTTGAGATTACTGGTGGGCCTGATGTCCCCTTCCATCCAGGAAGAGAGGACAAGCCTGAGCCACCTCCAGAAGGCCGTCTTCCTGAT…	MGKSYPTVSEEYKKAIDKAKRKLRGFIAEKACAPLMLRIAWHSAGTYDSRTKTGGPFGTMKHAAEQSHGANAGLDIAVRLLEPIKQQFPILSYADFYQLAGVVAVEITGGPDVPFHPGREDKPEPPPEGRLPDATKGNDHLRDVFGKTMGLSDQDIVALSGGHTLGRCHKERSGFEGPWTPNPLIFDNSYFTVLLSEKYDGLLMLPTDTALLSDPVFRPLVEKYAADEDAFFADYAAAHQRLSELGFAEA	2038.79	AT1G07890.8	2e-147	APX1, MEE6, CS1, ATAPX1, ATAPX01	ascorbate peroxidase 1		g2202237046S415589-PHIS2-LDOX-2-70_T7.seq	L-ascorbate peroxidase, cytosolic
LOC18774692	PRUPE_6G101600	ATGGCTAAAGATGTAGAGGGAGCTGAGCATGGTGAGTTTGCAGCCAAAGACTACCATGACCCTCCTCCAACCCCCTTCTTTGATCCTGAGGAGCTGACCAAATGGTCTTTCTACAGAGCTCTTATTGCTGAGTTCGTTGCCACCCTTCTCTTCCTTTACATCACCGTTTTGACCGTCATTGGCTACAAGTCCCAGAGCAGTGGAGACCAATGCGGCGGCGTTGGCATTCTGGGCATCGCCTGGGCCTTTGGTGGCATGATCTTTGTCCTTGTTTACTGCACCGCCGGTATTTCTGGTGGACACATAAACCCAGCTGTGACCTTTGGACTATTCTTGGCTCGCAAGGTTTCACTGCCGAGGGCAGTTTTGTACATCGTAGCCCAGTCTTTGGGTGCAATC…	MAKDVEGAEHGEFAAKDYHDPPPTPFFDPEELTKWSFYRALIAEFVATLLFLYITVLTVIGYKSQSSGDQCGGVGILGIAWAFGGMIFVLVYCTAGISGGHINPAVTFGLFLARKVSLPRAVLYIVAQSLGAICGVGLVKAFQKTYYEEYGGGANELAAGYNKGTGLGAEIIGTFVLVYTVFSATDPKRNARDSHVPVLAPLPIGFAVFIVHLATIPITGTGINPARSFGAAVIYNKDKAWDDQWIFWLGPFIGAAIAALYHQYILRAGAIKALGSFRSNA	443.396	AT2G37170.1	3e-170	PIP2B, PIP2;2	plasma membrane intrinsic protein 2		g2202237057S415589-PHIS2-LDOX-2-81_T7.seq	aquaporin PIP2-2
LOC18774729	PRUPE_6G075100	ATGGGTGTGGTGAGTGTTTCTGCTTGCCTTGCCTCTCTACTCATCTCACTAATGTGGGTAGCTGAAGCAAGAATCCCAGGGGTGTACAGTGGGGGTGCATGGGAAGCAGCTCATGCCACCTTCTACGGAGGCTCTGATGCCTCTGGCACCATGGGTGGGGCTTGTGGATATGGAAATCTCTACAGCCAAGGCTATGGCGTGAGCACAGCTGCACTGAGCACTGCCCTCTTCAACAATGGCCTCAGCTGCGGTGCCTGCTTTGAAATCAAGTGTGCAAACGACCCAAACTGGTGCCACTCTGGAAGCCCATCAATTTTCATCACTGCCACCAACTTCTGCCCTCCAAACTTTGCTCAACCAAGCGACAATGGCGGATGGTGCAATCCTCCCAGGCCGCAC…	MGVVSVSACLASLLISLMWVAEARIPGVYSGGAWEAAHATFYGGSDASGTMGGACGYGNLYSQGYGVSTAALSTALFNNGLSCGACFEIKCANDPNWCHSGSPSIFITATNFCPPNFAQPSDNGGWCNPPRPHFDLAMPMFLKIAEYRAGIVPVSYRRVPCRKRGGIRFTINGFRYFNLVLVSNVAGAGDIVRVSVKGSKTSWMSMSRNWGQNWQSNAVLVGQSLSFRVRGSDRRTSTSWNVVPANWQFGQTFTGKNFRV	278.91	AT2G39700.1	6e-164	ATEXPA4, ATEXP4, ATHEXP ALPHA 1.6, EXPA4	expansin A4		g2202237048S415589-PHIS2-LDOX-2-72_T7.seq	expansin-A6
LOC18775110	PRUPE_6G308600	ATGGGGTTATCTTTCACCAAGTTGTTCAGTCGTCTTTTTGCTAAAAAAGAAATGCGAATTCTTATGGTCGGTCTCGATGCTGCTGGTAAAACTACCATATTGTACAAGCTTAAGCTCGGAGAGATCGTGACCACCATTCCAACAATTGGATTCAATGTTGAAACTGTGGAATATAAAAACATTAGCTTTACGGTTTGGGATGTTGGAGGCCAGGACAAGATTCGACCTTTATGGAGACACTACTTCCAAAATACACAAGGGCTGATTTTTGTGGTTGATAGCAATGATCGTGATCGTGTTGTTGAGGCTAGGGATGAGCTGCATAGGATGTTGAATGAGGATGAGTTGAGGGATGCAGTGCTGCTTGTATTCGCTAACAAGCAAGATCTCCCAAATGCA…	MGLSFTKLFSRLFAKKEMRILMVGLDAAGKTTILYKLKLGEIVTTIPTIGFNVETVEYKNISFTVWDVGGQDKIRPLWRHYFQNTQGLIFVVDSNDRDRVVEARDELHRMLNEDELRDAVLLVFANKQDLPNAMNAAEITDKLGLHSLRQRHWYIQSTCATSGEGLYEGLDWLSNNIANKA	1019.25	AT1G10630.1	2e-132	ATARFA1F, ARFA1F	ADP-ribosylation factor A1F		g2202237049S415589-PHIS2-LDOX-2-73_T7.seq	ADP-ribosylation factor
LOC18775788	PRUPE_5G060000	ATGAATCCCGAATATGACTATTTGTTCAAGCTTTTGTTGATTGGAGATTCTGGTGTCGGCAAGTCATGTCTACTTCTGCGGTTTGCTGATGATTCATACTTGGATAGCTACATCAGCACAATTGGAGTTGACTTTAAAATTCGCACTGTGGAGCAGGATGGGAAGACTATCAAACTCCAAATTTGGGACACTGCTGGCCAAGAACGTTTTAGGACAATCACTAGCAGCTACTACCGCGGGGCTCATGGAATCATTGTTGTTTATGATGTCACAGACCAAGAGAGCTTTAACAATGTTAAGCAATGGTTGAATGAAATCGACCGATATGCAAGTGAAAATGTGAACAAGCTTCTAGTGGGAAACAAGTGCGATCTCACGGCAAATAAAGTTGTGTCCTAC…	MNPEYDYLFKLLLIGDSGVGKSCLLLRFADDSYLDSYISTIGVDFKIRTVEQDGKTIKLQIWDTAGQERFRTITSSYYRGAHGIIVVYDVTDQESFNNVKQWLNEIDRYASENVNKLLVGNKCDLTANKVVSYETAKAFADEIGIPFMETSAKNSTNVEQAFMAMAAEIKNRMASQPMNNARPPTVQIRGQPVNQKSGCCSS	345.619	AT4G17530.1	4e-139	RAB1C, ATRAB1C, ATRABD2C	RAB GTPase homolog 1C		g2202237049S415589-PHIS2-LDOX-2-73_T7.seq	ras-related protein RABD2c
LOC18776002	PRUPE_5G117800	ATGGACACAATGCAAGACAGTAAGCTTGCTTTTGGGTTTTCTGACACCATTGACATCAGATCTTCACTCTCAAATCTCATCTTAACAAGCAACACAAACACCTTGGACTCAATTTTCTCCCATTGCCCACAAACACTCTCCACCACCACCAGCAACAACAGCTCTGTTTCTGAGCCACTGGGTTCATCAGTTTACCTTCGCCAGAGAGACCTTCTCCAGAAGTTCTGCGACGAAAGCCGGGCAAACGCCGAGGTTTCACGCTTTTTTCAGAAGAACCCAGTTCAGAGCTCTGCTTGTTCTTCAACCTCTTACATGGCTCCATGCAAGAAGAAGCTCTACAGGGGAGTGAGACAGAGGCATTGGGGCAAATGGGTCGCTGAGATCAGGCTCCCTCAGAAC…	MDTMQDSKLAFGFSDTIDIRSSLSNLILTSNTNTLDSIFSHCPQTLSTTTSNNSSVSEPLGSSVYLRQRDLLQKFCDESRANAEVSRFFQKNPVQSSACSSTSYMAPCKKKLYRGVRQRHWGKWVAEIRLPQNRMRVWLGTYDTAEAAAYAYDRAAYKLRGEYARLNFPNLKDPSKMGFGDCARLDAVKTSVDAKIQAICQKVKRERAKKNAKKSSNSSENEKAVMKVDSSLSSSSPSGFGDGSGQELVSSTPTATPTVSEDGVWRCENSPPSISTEWPMGMAEDLEFEGCLLARMPSYDPELIWEVLAN	212.538	AT1G64380.1	6e-68		Integrase-type DNA-binding superfamily protein	TF	g2202237032S415589-PHIS2-LDOX-2-56_T7.seq	ethylene-responsive transcription factor ERF061
LOC18776035	PRUPE_5G168200	ATGTCGATGTCGAAGAGCTCCAAGATGCTGCAATTCATAAACTACCGAATGCGAGTGACGATCCAAGACGGTCGGCAGCTCGTCGGCAAGTTCATGGCCTTCGATCGCCACATGAACCTCGTCCTGGGCGACTGCGAGGAGTTTCGCAAGCTCCCGCCATTGAAGGGCAAGAAGAGCAACGAGGAACGCGACGACCGTCGAACCCTAGGACTCGTCCTCCTCCGCGGTGAAGAGGTGATCTCCATGACCGTCGAGGGCCCACCTCCTCAGGAAGAGTCACGTGCCAAGGCCGCCAGCGCCGCCGCTTTGGCTGGCCCCGGTTTGGGCCGGGCCGCCGGTCGAGGTATCCCCACTGCTCCACTGGCCCAGGCACAGCCCGGTCTCTCCGGCCCGGTTCGA…	MSMSKSSKMLQFINYRMRVTIQDGRQLVGKFMAFDRHMNLVLGDCEEFRKLPPLKGKKSNEERDDRRTLGLVLLRGEEVISMTVEGPPPQEESRAKAASAAALAGPGLGRAAGRGIPTAPLAQAQPGLSGPVRGVGGPAPGMMQPQISRPPVPNLSAPPMSYPAAPVIRPPGQMPGYPGQGPPQMARGPPPGVPPPQFPRPGGPPLQFQGPPQMQFGQRPMGPPPPGQMMRGPPPPPRPGMPGPPPHRPGMPPPPGGQVPVFGPPRPGMPPPPNPQNQQQNQQQQ	278.361	AT5G44500.2	1e-89		Small nuclear ribonucleoprotein family protein		g2202237043S415589-PHIS2-LDOX-2-67_T7.seq	small nuclear ribonucleoprotein-associated proteins B and B'
LOC18776239	PRUPE_5G222500	ATGTTTACTTCAAGGAAGAAGATTCACAAAGATAACAATGCTGAACCGACTGAATTCGAAGAGTCAGTTGCACAAGCAGTAATTGAATTGGAAAGTAACAGTGACCTGAAAAGTGACCTGAAGGATCTATATATCAACTCAGCAGTTCAAGTTGATGTGTCTGGAAACCGGAAGGCCGTTGTTATTCATATTCCATATAGACTGAGGAAGGCTTATCGCAAGATCCATGTTCGGCTCGTGAGGGAGCTCGAGAAGAAGTTCAGTGGGAAGGATGTTATCCTGATTGCCACACGTAGGATATTGAGGCCTCCAAAGAAGGGGTCAGCTGCCCAACGTCCCCGCACTCGTACTCTAACTGCTGTGCACGAGGCAATGTTGGAGGATGTTGTTGCGCCTGCT…	MFTSRKKIHKDNNAEPTEFEESVAQAVIELESNSDLKSDLKDLYINSAVQVDVSGNRKAVVIHIPYRLRKAYRKIHVRLVRELEKKFSGKDVILIATRRILRPPKKGSAAQRPRTRTLTAVHEAMLEDVVAPAEIVGKRTRYRLDGSKIMKVFLDPKERNNTEYKLESFSAVYRKLSGKDVVFEYPITDA	473.725	AT1G48830.2	6e-109		Ribosomal protein S7e family protein		g2202237055S415589-PHIS2-LDOX-2-79_T7.seq	40S ribosomal protein S7-1
LOC18776631	PRUPE_5G019600	ATGGTGAAGCACAACAATGTCATTCCTAGCTCGCACTTCAGAAAGCATTGGCAGAATTATGTGAAAACGTGGTTTAATCAGCCAGCGCGTAAAACACGGAGAAGAAAGGCCCGTCAAGAGAAAGCTGTGAAGATTTTTCCTCGCCCTACATCTGGACCACTGCGGCCTATCGTTCATGGCCAAACGTTAAAATACAATATGAAAGTAAGATCTGGCAGAGGATTTACTCTTGAAGAACTGAAGACTGCTGGTATCCCGAAGAAGCTTGCTCCAACCATTGGCATAGCTGTTGATCATCGCCGCAAAAATCGATCTCTAGAAGGTCTTCAAGCAAATGTTCAGAGGTTGAAAACATACAAGGCCAAGTTAGTTGTCTTCCCAAGACGTGCACGGAAGTTG…	MVKHNNVIPSSHFRKHWQNYVKTWFNQPARKTRRRKARQEKAVKIFPRPTSGPLRPIVHGQTLKYNMKVRSGRGFTLEELKTAGIPKKLAPTIGIAVDHRRKNRSLEGLQANVQRLKTYKAKLVVFPRRARKLKAGDSSPEELANATQIQGPYMPIVREKPTVELVKVTNDMKAFKAYDKLRVERMNERHVGARLKKAAEAEKEEKK	459.661	AT3G49010.3	8e-123	ATBBC1, BBC1, RSU2	breast basic conserved 1		g2202236996S415589-PHIS2-LDOX-2-20_T7.seq	60S ribosomal protein L13-1
LOC18776700	PRUPE_5G101400	ATGGAGGGCAAGGAAGAAGATGTTAAGCTTGGAGCTAACAAGTTCCCAGAGAGGCAGCCTATTGGGACATCAGCTCAGACAGACAAGGACTACAAGGAGCCTCCCCCAGCTCCGTTGTTTGAGCCTGGTGAGCTCACTTCATGGTCTTTTTACAGAGCTGGAATTGCTGAGTTCATTGCCACCTTCTTGTTCCTCTACATCACCATCTTGACTGTGATGGGTGTGAACAGGGCTCCTAGTAAGTGTGCCTCTGTTGGCATCCAAGGAATTGCTTGGGCTTTTGGTGGCACCATCTTTGCCCTTGTCTACTCCACTGCTGGTATCTCAGGTGGACACATCAACCCAGCTGTGACCTTTGGTCTCTTCCTGGCAAGGAAACTCTCCCTTACAAGAGCTGTT…	MEGKEEDVKLGANKFPERQPIGTSAQTDKDYKEPPPAPLFEPGELTSWSFYRAGIAEFIATFLFLYITILTVMGVNRAPSKCASVGIQGIAWAFGGTIFALVYSTAGISGGHINPAVTFGLFLARKLSLTRAVFYIVMQTLGAIAGAGVVKGFEKKQYELLGGGANVVNHGYTKGGGLGAEIVGTFVLVYTVFSATDAKRNARDSHVPILAPLPIGFAVFLVHLATIPITGTGINPARSLGAAIIFNKDRAWDDHWIFWVGPFIGAALAAIYHQIVIRAIPFKSRG	1565.97	AT2G45960.1	0	PIP1B, TMP-A, ATHH2, PIP1;2	plasma membrane intrinsic protein 1B		g2202237057S415589-PHIS2-LDOX-2-81_T7.seq	aquaporin PIP1-2
LOC18776773	PRUPE_5G011400	ATGGATCCTTACAAGCACCGCCCTTCAAGTGCTTTTGATTCCCCATACTGGACCACAAACGCCGGTGCTCCAGTTTGGAACAACGACTCTTCTTTGACTGTTGGACCTAGAGGTCCAGTTCTCCTTGAGGACTATCATCTGGTGGAGAAACTTGCCACCTTTGATAGAGAACGAATCCCAGAGCGTGTTGTCCATGCTAGGGGAGCCAGTGCAAAGGGATTCTTTGAGGTCACTCATGATATTTCTCAGCTTACTTGTGCTGACTTCCTTCGAGCCCCTGGTGTTCAGACACCTGTCATTGTGCGTTTCTCCACTGTTATCCATGAGCGTGGCAGCCCTGAAACCCTGAGGGATCCTCGTGGTTTTGCAGTGAAGTTTTACACCAGAGAGGGTAATTTT…	MDPYKHRPSSAFDSPYWTTNAGAPVWNNDSSLTVGPRGPVLLEDYHLVEKLATFDRERIPERVVHARGASAKGFFEVTHDISQLTCADFLRAPGVQTPVIVRFSTVIHERGSPETLRDPRGFAVKFYTREGNFDLVGNNFPVFFVRDAMKFPDAIRAFKPNPKSHIQETWRILDFFSHLPESLHTFAFFYDDLGVPQDYRHMEGSSVHAYTLISKAGKVHYVKFHWKPTCGVKCLLEDEAIKVGGANHSHATKDLYDSIAAGNYPEWKLYIQTMDPDHEDRFDFDPLDLTKTWPEDILPLQPVGRLVLNKNIDNFFAENEQLAFNPAHVVPGIYYSDDKMLQTRIFAYSDTQRHRLGPNYLQLPVNAPKCPHHNNHHEGFMNFMHRDEEVNYFPSRHDP…	1164.72	AT4G35090.1	0	CAT2	catalase 2		g2202237008S415589-PHIS2-LDOX-2-32_T7.seq	catalase isozyme 1
LOC18777055	PRUPE_5G086700	ATGGTGAGCTCTGATTCAGTGAACTCAAGAGTTGAGACCTTGTCCAGCAGTGGAATTGCAACAATCCCAAAGGAGTACATCAGACCCAAGGAAGAGCTCATAAACATCAGTGACATCTTCGAACAGGAGAAGAGCACTGATGGGCCTCAAGTTCCCACCATTGATTTGAAGGAGATAGACTCTGAGAACGAAAATGTGAGAGAGAGATGCAGGGAGGAGTTGAAGAAGGCAGCAGTGGACTGGGGTGTCATGCACCTTGTGAACCATGGCATCTCCGATGAGCTCATGGACCGTGTCAGGAAGGCCGGGAAGGCCTTTTTCGATCTTCCCATTGAGCAAAAGGAGAAGTATGCCAATGACCAGGCCTCTGGCAAAATTCAAGGCTATGGAAGCAAGCTT…	MVSSDSVNSRVETLSSSGIATIPKEYIRPKEELINISDIFEQEKSTDGPQVPTIDLKEIDSENENVRERCREELKKAAVDWGVMHLVNHGISDELMDRVRKAGKAFFDLPIEQKEKYANDQASGKIQGYGSKLANNASGQLEWEDYFFHLVYPEDKRDLSIWPQTPADYIEATAEYAKELRALATKVLRVLSLGLGLEEGRLEKEVGGLEELLLQMKINYYPLCPQPELALGVEAHTDVSALTFILHNMVPGLQLFYEGKWVTAKCVPNSIIMHIGDTIEILSNGKYKSILHRGMVNKEKVRISWAVFCEPPKEKIILKPLPETVSETEPPIFPPRTFAEHIQHKLFRKSQEALLNK	1332.06	AT4G22880.2	0	LDOX, TDS4, TT18, ANS	leucoanthocyanidin dioxygenase		g2202237001S415589-PHIS2-LDOX-2-25_T7.seq	leucoanthocyanidin dioxygenase
LOC18777388	PRUPE_5G195100	ATGGCAACGGTCACAACACAGGCCTCAGCGGCTGTTTTCAGGCCATGCATCAACTCAAAATCCAGGTTCCTTACTGGGTCTTCTTCTACTAAATTAAATAGGGAAGTGTCTTTCATTAGGCCCATGGCTTCTCCATCTGCTACTTCTTTTAAAGTTGAAGCCAAGAAGGGTGAGTGGTTGCCAGGCTTGGCCTCACCAGGCTACCTCACTGGCAGTCTTCCTGGTGACAATGGATTTGATCCTCTGGGACTTGCTGAGGACCCAGAGAACCTCAGGTGGTATGTCCAAGCTGAGCTCGTGAATGGCAGATGGGCAATGTTGGGTGTTGTTGGGATGCTGTTGCCTGAAGTGTTCACAAGCATTGGGATCCTTAATGTTCCTAAATGGTATGATGCTGGC…	MATVTTQASAAVFRPCINSKSRFLTGSSSTKLNREVSFIRPMASPSATSFKVEAKKGEWLPGLASPGYLTGSLPGDNGFDPLGLAEDPENLRWYVQAELVNGRWAMLGVVGMLLPEVFTSIGILNVPKWYDAGKAEYFASSSTLFVIEFILFHYVEIRRWQDIKNPGSVNQDPIFKQYSLPPNEVGYPGGIFNPLNFAPTLEAKEKEIANGRLAMLAFLGFVVQHNVTGKGPFDNLLQHLSDPWHNTIVQTLRGY	348.154	AT3G47470.1	2e-158	LHCA4, CAB4	light-harvesting chlorophyll-protein complex I subunit A4		g2202237064S415589-PHIS2-LDOX-2-88_T7.seq	chlorophyll a-b binding protein P4, chloroplastic
LOC18778012	PRUPE_5G109700	ATGGCTGAGAAGGATGGAGATCATGAAGCAAACGCATACCACCAGGCCGAGGAGCTCAAACGCCAGAAGAAAATCAAAAGGTTGAAATATTTTGGTATTTTCATTGTGTTTCAAGTCATAGTAATCACCATATTCTCACTCACTGTGATGAAAGCTAAGACTCCAAAACTCAAGTTGGCAAGCAACGTCTATATCCAAACACTCACCTATTCCCCGGCAACACCTTCGTTCGATATGAGCTTCATAACACAAGTCAGAGTGCGAAACCCAAACTGGGGTCCTTTTAAGTTTCGTGACGGCACCGTCGTGTTTACGTACCAAGGTGTGGTTGTTGGGCAAGTTTATATTCCAAATGGCAAAGTCGGATTGCGATCCACCAAAAAAATCACTGTGCTTGTG…	MAEKDGDHEANAYHQAEELKRQKKIKRLKYFGIFIVFQVIVITIFSLTVMKAKTPKLKLASNVYIQTLTYSPATPSFDMSFITQVRVRNPNWGPFKFRDGTVVFTYQGVVVGQVYIPNGKVGLRSTKKITVLVNVNSNALPGKSALGNELSNGLLLLTSTAELKGKVELMLIMKTKKTAELSCSMVFNLAARSLQNLDCN	419.239	AT2G46150.1	2e-17		Late embryogenesis abundant (LEA) hydroxyproline-rich glycoprotein family		g2202236999S415589-PHIS2-LDOX-2-23_T7.seq	uncharacterized
LOC18778082	PRUPE_5G155800	ATGGGGAAGATCAAGATCGGAATCAACGGATTTGGAAGGATCGGAAGGTTGGTGGCCAGAGTGGCTCTGCAGAGAGATGATATTGAACTCGTCGCCATTAACGATCCTTTCATCACCGGCGACTACATGGTTTACATGTTCAACTATGACACTGTGCACGGTCGCTGGAAGCATAACGATGTCAAGCTTAGGGACGCAAACACCCTTCTCTTTGGTGACAAGCCCGTCTCTATTTTTGCTGTCAGGAACCCAGATGAGATCCCATGGTCTGGGAGTGGAGCTGAATATGTTGTCGAGTCAACCGGTGTTTTCACCGATAAGGAAAAGGCTGCTGCCCATTTGAAGGGTGGAGCGAAGAAGGTTATCATCTCAGCCCCCAGCAAAGACGCTCCTATGTTT…	MGKIKIGINGFGRIGRLVARVALQRDDIELVAINDPFITGDYMVYMFNYDTVHGRWKHNDVKLRDANTLLFGDKPVSIFAVRNPDEIPWSGSGAEYVVESTGVFTDKEKAAAHLKGGAKKVIISAPSKDAPMFVVGVNEKEYKPDLNIVSNASCTTNCLAPLAKVIHDRFGIVEGLMTTVHSITATQKTVDGPSSKDWRGGRAASFNIIPSSTGAAKAVGKVLPDLNGKLTGMSFRVPTVDVSVVDLTVRLAKSATYDEVKAAIKEESEGKLKGILGYTEDDVVSTDFVGDSRSSIFDAKAGIALNDNFHKLVSWYDNEWGYSSRVVDLISYIASVDHA	490.324	AT3G04120.1	0	GAPC, GAPC-1, GAPC1	glyceraldehyde-3-phosphate dehydrogenase C subunit 1		g2202236990S415589-PHIS2-LDOX-2-14_T7.seq	glyceraldehyde-3-phosphate dehydrogenase, cytosolic
LOC18778290	PRUPE_4G176200	ATGGCTCCGACGTCGCCCAAGTCTCCAACCAAATCCGGCTCCGAAATCCCGAGCCCAAACTCCAAAGAGATCCGGTACCGCGGTGTCCGTAAGAGGCCCTGGGGCCGCTACGCCGCCGAGATCAGAGATCCCGGGAAGAAGACGCGCGTCTGGCTCGGGACCTTCGACACTGCCGAGGAGGCAGCGCGTGCCTATGACAAAGCGGCGCGTGAGTTCCGCGGGGCCAAGGCGAAGACTAACTTCCCCACCCCCGCTGAGCTCCAGCTCGAGGCCGCTGCCAACATCAACAGCCACAACAACAACGTGCCGAAGGCTGCCGCGGCAAACAACAGCCCCAGCCAGAGCAGCACCGTTGAGTCCTCGTCCCCGCCGCCGCCTCCGCTGGACCTCGCTCTAGCG…	MAPTSPKSPTKSGSEIPSPNSKEIRYRGVRKRPWGRYAAEIRDPGKKTRVWLGTFDTAEEAARAYDKAAREFRGAKAKTNFPTPAELQLEAAANINSHNNNVPKAAAANNSPSQSSTVESSSPPPPPLDLALAPHFAAGGGYFTAASGFRAVPVARPVLFFDAFARAENAAALQRAREMCRFERAVVAPSSGGAHSDSSSSSVVDFDRSLPNGRLDLDLNLPPPSEVA	229.472	AT3G15210.1	3e-45	ATERF-4, ERF4, RAP2.5, ATERF4	ethylene responsive element binding factor 4	TF	g2202237032S415589-PHIS2-LDOX-2-56_T7.seq	ethylene-responsive transcription factor 4
LOC18778639	PRUPE_4G044100	ATGCTTGCAATATTCAACAAGGAAGTGGTGCAGCCACCACAGGAGCTCAACAGCCCTGCCCCATCCAATTCTGCCAAGAGGCCTCAAGAGATTGTCAAAGATTTCATGTCTTGCCATGATCCCAACAATGCTTTCTCTGTCTGCTTCGGAAACACAGCAATGCTCGCCTATGTTCCTCCAAACAACCCCTACCCGATTCAACAGAGGCTGTTTTGTTCTTTGGATAATATATACTGCATTTTCTTGGGGAGCCTGAACAATCTTTGCAGCCTGAACAAGCAGTACGGGCTATCCAAATGCACCAATGAGGCCATGTTTGTGATGCAGGCCTATCGGACCCTCCGTGACCGGGGCCCATACCCGGCGGATCAGGTGCTCAAGGATCTTGATGGAAGCTTT…	MLAIFNKEVVQPPQELNSPAPSNSAKRPQEIVKDFMSCHDPNNAFSVCFGNTAMLAYVPPNNPYPIQQRLFCSLDNIYCIFLGSLNNLCSLNKQYGLSKCTNEAMFVMQAYRTLRDRGPYPADQVLKDLDGSFGFVIYDSTAGTVFAALGANEEVSLFWGIAADGSVVVSDNLGVIKGSCAKSFAPFPAGCMFHSEQGLMSFEHPTRKMKAMPRIDSEGVMCGANFKVDVQSRVPNMPRVGSEANWATWGPSSPA	531.942	AT4G27450.1	6e-125		Aluminium induced protein with YGL and LRDR motifs		g2202236993S415589-PHIS2-LDOX-2-17_T7.seq	stem-specific protein TSJT1
LOC18778652	PRUPE_4G076300	ATGGCTGCCTCCACTATGGCTCTCTCTTCCCCCACATTCGCCGGCAAGGCCGTGCAACTTGCTCCGGGAGCCACCGAGCTTTTCGGCAACGGAAGAGTCTCCATGAGGAAAACTGGGGCTAAGCAAGTTTCCTCTGGAAGCCCATGGTACGGCCCAGACAGAGTTAAGTACTTGGGCCCATTCTCTGGTGAGCCCCCAAGTTACCTAACTGGTGAGTTCCCTGGTGACTATGGCTGGGACACTGCTGGGCTTTCAGCTGACCCAGAGACCTTCGCCAAGAACCGTGAGCTTGAGGTGATCCACTCCAGATGGGCCATGCTAGGAGCTCTTGGGTGTGTTTTCCCTGAGCTCTTGGCCCGCAACGGTGTCAAGTTCGGTGAAGCCGTGTGGTTCAAGGCC…	MAASTMALSSPTFAGKAVQLAPGATELFGNGRVSMRKTGAKQVSSGSPWYGPDRVKYLGPFSGEPPSYLTGEFPGDYGWDTAGLSADPETFAKNRELEVIHSRWAMLGALGCVFPELLARNGVKFGEAVWFKAGAQIFSEGGLDYLGNPSLVHAQSILAIWATQVVLMGAVEGYRIAGGPLGEITDPLYPGGSFDPLGLADDPEAFAELKVKELKNGRLAMFSMFGFFVQAIVTGKGPLENLADHLADPVNNNAWSYATNFVPGK	3293.59	AT2G34430.1	4e-172	LHB1B1, LHCB1.4	light-harvesting chlorophyll-protein complex II subunit B1		g2202237064S415589-PHIS2-LDOX-2-88_T7.seq	chlorophyll a-b binding protein of LHCII type 1
LOC18779231	PRUPE_4G107100	ATGGCCACCACTGGGAACAAGAACATCAATGCCAAATTGGTGCTTCTTGGGGATGTTGGAGCTGGGAAGTCTAGTCTGGTGTTGCGCTTTGTAAAAGGACAATTTATTGAATTCCAGGAATCAACCATAGGTGCTGCCTTCTTCTCACAAACATTGGCTGTAAATGACGCAACTGTAAAATTTGAGATTTGGGATACAGCAGGTCAAGAGAGGTACCATAGTTTGGCTCCAATGTATTATAGAGGAGCTGCTGCTGCAATAATTGTGTATGATTTAACAAATCAAGCATCATTTGAGCGAGCAAAAAAATGGGTACTGGAACTCAAATCACAAGGCAATCCAAACATGGTTATGGCACTAGCTGGGAATAAAGCAGATCTGGTAGAGGCAAGGACTGTA…	MATTGNKNINAKLVLLGDVGAGKSSLVLRFVKGQFIEFQESTIGAAFFSQTLAVNDATVKFEIWDTAGQERYHSLAPMYYRGAAAAIIVYDLTNQASFERAKKWVLELKSQGNPNMVMALAGNKADLVEARTVAAEDAQAYAQENGLFFLETSAKTADNVNDIFYEIAKRLPRVQPVQNPAGMVLMDRPSERVASSSCCS	212.25	AT4G19640.1	2e-126	ARA7, ARA-7, ATRABF2B, ATRAB5B, RABF2B, ATRAB-F2B, RAB-F2B	Ras-related small GTP-binding family protein		g2202237049S415589-PHIS2-LDOX-2-73_T7.seq	ras-related protein RABF2b
LOC18779585	PRUPE_4G190500	ATGGCATCTACACTAATGGCAGCAACTGCTAGCTCCAGCACTCTTCTTAGACCAACCCCATTTCTTGGCCAAACCAGAGGGCCAAGTTTCAACACTCTTAGAGATGTTGCCCCAATGGGAACTGGGAAATACACCATGGGAAATGAGTTGTGGTATGGGCCAGACAGAGTGAAGTATTTGGGACCCTTTTCTGCTCAGACTCCATCGTACCTCACCGGAGAATTTCCCGGTGATTACGGATGGGACACTGCAGGGTTATCAGCTGACCCAGAGGCCTTTGCTAAGAACAGGGCTCTTGAGGTGATCCACGGCCGGTGGGCTATGCTTGGAGCACTAGGCTGCATCACCCCAGAGGTGCTTGAAAAATGGGTTAGAGTGGACTTCAAAGAGCCAGTGTGG…	MASTLMAATASSSTLLRPTPFLGQTRGPSFNTLRDVAPMGTGKYTMGNELWYGPDRVKYLGPFSAQTPSYLTGEFPGDYGWDTAGLSADPEAFAKNRALEVIHGRWAMLGALGCITPEVLEKWVRVDFKEPVWFKAGAQIFSEGGLDYLGNPNLVHAQSILAVLGFQVILMGLVEGFRINGLDGVGEGNNLYPGGQYFDPLGLADDPVTFAELKVKEIKNGRLAMFSMFGFFVQAIVTGKGPLENLLDHLDNPVANNAWVYATKFVPGS	589.297	AT5G54270.1	6e-177	LHCB3, LHCB3*1	light-harvesting chlorophyll B-binding protein 3		g2202237064S415589-PHIS2-LDOX-2-88_T7.seq	chlorophyll a-b binding protein 3, chloroplastic
LOC18780279	PRUPE_4G222300	ATGAGGAGGGGCAGAGGAGCCGCCGCCAGAGCCGCAGCAGCGACGCCGGCAGAACCCGCCGGATCCAGGCCCAATATCGCCAACGAGGTCCGGTATCGGGGGGTCCGCAAAAGACCATGGGGACGGTTCGCGGCCGAGATCCGAGACCCGTGGAAGAAGACCCGGGTTTGGCTCGGCACCTTCGACTCGGCCGAAGACGCCGCACGAGCCTATGACGCTGCCGCTCACATCCTCCGCGGCCCCAAAGCCAAGACCAACTTCCCGATCTCATGTGCTTACCCTCCTCCCCTCTACAACAACCCAACCGACCAGGCCATTGAGACGAAGCTTTTCGGGTCGGGTTACGGGTTTCAGGACAACCCGGTTGTCGATCCGCAGAGGCCCACGTCCAGCAGCCTC…	MRRGRGAAARAAAATPAEPAGSRPNIANEVRYRGVRKRPWGRFAAEIRDPWKKTRVWLGTFDSAEDAARAYDAAAHILRGPKAKTNFPISCAYPPPLYNNPTDQAIETKLFGSGYGFQDNPVVDPQRPTSSSLSSTVESFSGPRPPPQSTTIAAESSRRKRQPRTPPVVPEDCHSDCDSSSSVVEDDGDFAASSSFRKTLLPFDLNFPPLDEEGELGGGEGQDLRCTALCL	201.248	AT3G20310.1	2e-53	ATERF-7, ATERF7, ERF7	ethylene response factor 7	TF	g2202237032S415589-PHIS2-LDOX-2-56_T7.seq	ethylene-responsive transcription factor 3
LOC18780446	PRUPE_4G076200	ATGGCTGCTTCCATGGCTCTGTCTTCCCCAACATTCGCCGGCAAGGCCGTGCAACTTGCTCCGGGAGCCACCGAGCTTTTCGGCAACGGAAGAGTCTCCATGAGGAAAACTGGGGCCAAGCAAGTTTCCTCTGGAAGCCCATGGTACGGCCCAGACAGAGTTAAGTACTTGGGCCCATTCTCTGGTGAGCCCCCAAGTTACCTAACTGGTGAGTTCCCTGGTGACTATGGCTGGGACACTGCTGGGCTTTCAGCTGACCCAGAGACCTTCGCCAAGAACCGTGAGCTTGAGGTGATCCACTCCAGATGGGCCATGCTAGGAGCTCTTGGGTGCGTTTTCCCTGAGCTCTTGGCCCGCAACGGTGTCAAGTTCGGTGAAGCCGTGTGGTTCAAGGCCGGA…	MAASMALSSPTFAGKAVQLAPGATELFGNGRVSMRKTGAKQVSSGSPWYGPDRVKYLGPFSGEPPSYLTGEFPGDYGWDTAGLSADPETFAKNRELEVIHSRWAMLGALGCVFPELLARNGVKFGEAVWFKAGAQIFSEGGLDYLGNPSLVHAQSILAIWATQVVLMGAVEGYRIAGGPLGEITDPLYPGGSFDPLGLADDPEAFAELKVKELKNGRLAMFSMFGFFVQAIVTGKGPLENLADHLADPVNNNAWSYATNFVPGK	1465.18	AT1G29930.1	1e-169	CAB1, AB140, CAB140, LHCB1.3	chlorophyll A/B binding protein 1		g2202237064S415589-PHIS2-LDOX-2-88_T7.seq	chlorophyll a-b binding protein of LHCII type 1
LOC18781012	PRUPE_4G079200	ATGAGCGACGATTCTAAGACCAGAGGACTCGCGGGGGACCAGCAGAGTCAGCAGTATTACGGCACCTTCCAAGGCGTTGCCAACTACTACCCCACGGTTCCTCCGCCACCGCCTGAGCCGGTCGTCGGTTTCCCTCAGCCGGTTCCTCCTCCCGGTTCGACTGGCCGCCCACCCTTGCCTCCCCATCACCAGCATCATCATCATCACCATCGTGGATACCAAACGGTCACTGGTTATGCTGTTGTTGAGGGAAGACCTGTGCATGAACGCCGCCTTCCTTGCTGTGGTATGGGCATCGGCTGGTTATTGTTTATAATTGGGTTCTTTCTTGGAGGCATCCCCTGGTATGTTGGAACTTTCATCTTACTTTGTGTGCGGGTGGACTACAGAGAAAAACCT…	MSDDSKTRGLAGDQQSQQYYGTFQGVANYYPTVPPPPPEPVVGFPQPVPPPGSTGRPPLPPHHQHHHHHHRGYQTVTGYAVVEGRPVHERRLPCCGMGIGWLLFIIGFFLGGIPWYVGTFILLCVRVDYREKPGYVACTIAFHQYQVVGRKLPTASDEHPKIYRMKLWATNEVRAKSKFWYFLRKLKKVKKSNGQVLAINEIFEKNPTTIKNYGIWLRYQSRTGYHNMYKEYRDTTLNGAVEQMYIEMASRHRVRFPCIQIIKTATIPAKLCKRESTKQFHNSKIKFPLVFRKVRPPSRKLKTTYKASRPNLFV	348.537	AT1G29970.2	1e-154	RPL18AA	60S ribosomal protein L18A-1		g2202237040S415589-PHIS2-LDOX-2-64_T7.seq	60S ribosomal protein L18a-2
LOC18781341	PRUPE_4G009800	ATGGCCACTGTTGAGGTTGCACCAGCAGCAACGTTGCAAGAAAATGAGGCAAAGACAGTTGAGGTGATCAAGACTGAAGAGAAAACCCCGGAAGAGCCTGTGGCTGCCGCACCAGCTGCTGTCACTGAGTCTGAGGCTGCAACCACCGAAGAGCCAAAGGAAACCACACCAGTAGAAGCAGAAGCAGAGGCAGAGGCACCTGCTGCTCCTGAAGCTGAAGCTCCAGTTCCAGCTGAAGTTGAGACCAAGGAGGTGGCAGAGGAAACCAAGGCTGCTGAGGCTGAGGCAGAGGAGCCAGCAGCAACAGAAACAGAGAAAACAGAGGCAGAAGAGCCCAAAGAGGTCACAGCAGCGGAGCCTGTTGCTGCTGTTGCTGAGGAGACCAAAGAAGAGACCACT…	MATVEVAPAATLQENEAKTVEVIKTEEKTPEEPVAAAPAAVTESEAATTEEPKETTPVEAEAEAEAPAAPEAEAPVPAEVETKEVAEETKAAEAEAEEPAATETEKTEAEEPKEVTAAEPVAAVAEETKEETTESAETPAAPPVEEEKPEETTTDVPVEKTEE	38115						g2202236987S415589-PHIS2-LDOX-2-11_T7.seq	fruit protein pKIWI501
LOC18781403	PRUPE_4G185400	ATGTTGGCTATTTTCCACAAGGCTTGTGCTCACCCACCAGAGGAGCTAAACAGTCCTGCTTCTCACAATGGAAGCAAGAAGCCTAAGCTCCCAGAAGAGACTCTCACGGAGTTCCTCAACCACCATCCTCACAACTCCTTCTCCATGGGCTTTGGCCGTGCTGCAGTGCTTGCTTATGTCAAGCCAGACCAACCCTTTTACTCCCAACACCAGAGGTTGTTCTGTGGTTTTGATGATATATACTGCCTGTTCTTGGGGAGCTTGAACAATCTGTGTTTGCTAAACAAGCAGTATGGTCTAACAAAAAATACCAATGAGGCCATGTTTGTGATTGAAGCTTATAGGACCCTTCGTGACAGGGGTCCCTACCCAGCTGATCAGGTTGTGAAGGATCTTGAT…	MLAIFHKACAHPPEELNSPASHNGSKKPKLPEETLTEFLNHHPHNSFSMGFGRAAVLAYVKPDQPFYSQHQRLFCGFDDIYCLFLGSLNNLCLLNKQYGLTKNTNEAMFVIEAYRTLRDRGPYPADQVVKDLDGSFAFVVYDSKGGNVFAALGSDGGVQLYWGIAADGSVVISDELEVIKEGCAKSFAPFPKGCLFHSEGGLMSFEHPMNKMKPMPRIDSEGAMCGATFNVDKYTRVNSIPRVGSEANWTEWASH	338.826	AT4G27450.1	6e-154		Aluminium induced protein with YGL and LRDR motifs		g2202236993S415589-PHIS2-LDOX-2-17_T7.seq	stem-specific protein TSJT1
LOC18782203	PRUPE_3G053900	ATGGGAAAGGTTCACGGATCGCTCGCACGTGCCGGGAAGGTTAGGGGCCAGACCCCAAAGGTTGCCAAGCAAGACAAGAAGAAGAAGCCCAGAGGCCGCGCCCACAAGCGTATGCAGTACAACAGGAGATTCGTCACGGCCGTTGTTGGATTCGGAAAGAAGAGGGGGCCTAACTCTTCCGAGAAGTAA	MGKVHGSLARAGKVRGQTPKVAKQDKKKKPRGRAHKRMQYNRRFVTAVVGFGKKRGPNSSEK	1280.54	AT5G56670.1	7e-29		Ribosomal protein S30 family protein		g2202237066S415589-PHIS2-LDOX-2-90_T7.seq	40S ribosomal protein S30
LOC18783141	PRUPE_3G063500	ATGGCCAAAATAGCATTTGGGCGCTTTGATGATTCTTTCAGTTTGGGTTCCCTTAAGGCCTATCTTGCAGAGTTCATCTCAACCTTGCTCTTTGTTTTTGCAGGAGTTGGTTCAGCCATTGCTTACAACAAGTTGACATCCAATGCTGCTCTTGATCCTGCTGGGCTAGTAGCCATTGCTATTGCCCATGGCTTTGCTCTCTTTGTTGCAGTCGCAATTGGCGCCAACATCTCTGGTGGACATGTGAACCCAGCGGTCACCTTTGGATTGGCTCTTGGTGGCCAAATCACTGTCCTCACTGGCATCTTCTACTGGATTGCGCAGCTTCTTGGTGCCATTGTTGCTGCCTTCATCCTCAAGTTCGTCACCGGAGGCTTGACAATTCCAATCCACAGTTTG…	MAKIAFGRFDDSFSLGSLKAYLAEFISTLLFVFAGVGSAIAYNKLTSNAALDPAGLVAIAIAHGFALFVAVAIGANISGGHVNPAVTFGLALGGQITVLTGIFYWIAQLLGAIVAAFILKFVTGGLTIPIHSLAAGVGAIQGVIFEIIITFALVYTVYATAADPKKGALGTIAPMAIGFIVGANILAAGPFSGGSMNPARSFGPAVASGDFHDNWIYWVGPLIGGGLAGLIYGNVFFHTEHAPLVNEY	1435.81	AT3G16240.1	3e-140	DELTA-TIP, TIP2;1, DELTA-TIP1, AQP1, ATTIP2;1	delta tonoplast integral protein		g2202237057S415589-PHIS2-LDOX-2-81_T7.seq	aquaporin TIP2-1
LOC18783407	PRUPE_3G177000	ATGGTTGTTAAGGCTTCTCTCATACTGGTTCTCCTTGTAATCTTCTCCTGCACTCTAGTAGCGATTGCTGGAATTCACAACCACAACAATCAAACTCCTAATGGCTCCACTCTCGCTGGCATGGAAGTGCCAGAGCATATGAGCTTCAATGCTGTCTCCTCCTCATCCCACACTGGATGTAGCCTCAGCAGCTCAAGGAAAACCAAGCAATCAGATTCAACCATGGAAAAAGCAGTGTCCGATAATGAAGAATCTGACGACGACGAGGATGAAGTAGCTGATGATTCTGTGACAAAAATGAGAACCCATAAACAATCTGTGAAGCTCCACCTGAGGCACAGGTCACAGAACAGAGAATCCGAGCGTAAGAGTTCTGTGATTGAGTCCACAGTCAGAGAC…	MVVKASLILVLLVIFSCTLVAIAGIHNHNNQTPNGSTLAGMEVPEHMSFNAVSSSSHTGCSLSSSRKTKQSDSTMEKAVSDNEESDDDEDEVADDSVTKMRTHKQSVKLHLRHRSQNRESERKSSVIESTVRDLVRIQTLHTRIVEKKNQNTISRLQKDKKVHEFKPVVAPAASPESYTSELSGQLQATLKSGVSLGSGEYFMDVFIGTPPKHFSLILDTGSDLNWVQCAPCYACFEQDGPHYDPKDSTSFRDISCQDPRCRLVSSPDPPQPCKAENQTCPYFYWYGDSSNTTGDFSLETFTVNLTSHTGKTDFKRVENVMFGCGHWNRGLFHGAAGLLGLGRGPLSFASQLQSLYGHSFSYCLVDRNSDTNVSSKLIFGEDKELLSHPKLSYTSLVGG…	455.499	AT3G59080.1	0		Eukaryotic aspartyl protease family protein		g2202237040S415589-PHIS2-LDOX-2-64_T7.seq	protein ASPARTIC PROTEASE IN GUARD CELL 1
LOC18783488	PRUPE_3G169600	ATGTCCGGCCAAAGCCAGCGCTTGACTGTAGTTCCTACAGTTACAATGCTTGGAGTTATGAAAGCTCGCCTTGTGGGTGCGACAAGAGGTCATGCTCTGCTCAAGAAGAAGAGTGATGCTTTAACTGTGCAGTTTCGTCAGATTCTTAAAAATATTGTCTCAACCAAAGAATCCATGGGAGATGTTATGAAAAACTCATCCTTTGCCCTTACTGAAGCCAAGTATGTAGCTGGTGAGAACATCAAGCACATTGTTCTTGAGAATGTCCAAAATGCCTCTATTAAAGTTCGATCAAAGCAAGAGAATGTTGCTGGTGTAAAGCTCCCAAAGTTCGAATATTTTACTGAAGGTGAGACTAAGAATGATCTCACTGGATTGGCCAGAGGTGGACAACAGGTC…	MSGQSQRLTVVPTVTMLGVMKARLVGATRGHALLKKKSDALTVQFRQILKNIVSTKESMGDVMKNSSFALTEAKYVAGENIKHIVLENVQNASIKVRSKQENVAGVKLPKFEYFTEGETKNDLTGLARGGQQVQLCRAAYVKAIEVLVELASLQTSFLTLDEAIKTTNRRVNALENVVKPRLENTISYIKGELDELEREDFFRLKKIQGYKKREIERQMASAKQFADDQVAEKLSLKKGVSLNSAQNMLSAGMEKDDDIIF	201.296	AT3G58730.1	2e-157		vacuolar ATP synthase subunit D (VATD) / V-ATPase D subunit / vacuolar proton pump D subunit (VATPD)		g2202237067S415589-PHIS2-LDOX-2-91_T7.seq	V-type proton ATPase subunit D
LOC18783507	PRUPE_3G174700	ATGGCTTCTTCAACAATGGCTCTCTCCTCCCCTTCTCTTGCTGGCCAAGCTGTCAAGCTCGGTTCCTCTGTTTCTAACATTGTTGGTGAGGGCCGAGTTACCATGCGCAAAACCGCATCCAGGTCCAAAAATGTTTCATCCGGCAGCCCGTGGTACGGCCCTGACCGTGTCAAATACTTGGGCCCGTTCTCTGGCGAGGCCCCTTCTTACCTCACTGGAGAATTCCCCGGCGATTACGGTTGGGACACTGCTGGGCTCTCGGCTGACCCTGAGACCTTTGCCAAGAACCGTGAGCTTGAGGTCATCCACTCAAGATGGGCCATGCTCGGCGCTTTGGGCTGTGTTTTCCCCGAACTCTTGTCCCGTAACGGAGTCAAGTTCGGCGAAGCTGTTTGGTTC…	MASSTMALSSPSLAGQAVKLGSSVSNIVGEGRVTMRKTASRSKNVSSGSPWYGPDRVKYLGPFSGEAPSYLTGEFPGDYGWDTAGLSADPETFAKNRELEVIHSRWAMLGALGCVFPELLSRNGVKFGEAVWFKAGAQIFSEGGLDYLGNPSLVHAQSILAIWATQVILMGAVEGYRIAGGPLGEVTDPLYPGGSFDPLGLAEDPEAFAELKVKELKNGRLAMFSMFGFFVQAIVTGKGPIENLADHLADPVNNNAWAYATNFVPGK	4909.6	AT1G29930.1	6e-172	CAB1, AB140, CAB140, LHCB1.3	chlorophyll A/B binding protein 1		g2202237064S415589-PHIS2-LDOX-2-88_T7.seq	chlorophyll a-b binding protein of LHCII type 1
LOC18783672	PRUPE_3G032300	ATGTGTGGAGGTGCTATAATATCCGATTTCATAGCGCCGACTCGGTCCCGGCTCACCGCTGACTACCTCTGGCCCGATCTCAAAAAACCCAGTTCGGATAAGCGGTTCTCGAAGCCTCTCAGGCCCGAAATCATTGACTTAGACCACGACTTCGAGGCTGATTTCCAGGAATTCAAGGACGAGTCTGATGTGGACGAAGATGATGAAATGGTTGAGGCCAAGCCCTCTGCTTTCTCTGCTGGAAAGCCCTCTTCTGCTCGTGGCTCTACGACTGTGAAATTAGTGGAGTTCAATGGGCAGGCTGAGAAATCTGCAAAGAGAAAGAGGAAGAACCAGTACAGGGGAATTCGCCAGCGCCCATGGGGTAAGTGGGCTGCAGAGATCCGAGACCCAAGGAAA…	MCGGAIISDFIAPTRSRLTADYLWPDLKKPSSDKRFSKPLRPEIIDLDHDFEADFQEFKDESDVDEDDEMVEAKPSAFSAGKPSSARGSTTVKLVEFNGQAEKSAKRKRKNQYRGIRQRPWGKWAAEIRDPRKGVRVWLGTFNTAEEAARAYDSEARRIRGKKAKVNFPDETPRSSAKRSVKANPQKMLPKTNTNAVQPNLNQNINFVNDPNQDYYNAMGFLDEKPATNNFGFMSTFPANEDVALKSSTPSDAVPLYFSSDQGSNSFDCSDFGWGEQGSKTPEISSVLSCVMEESDDSLFLEDASPTKKLKSNPEDLVPVQDNAGKTLTDELSAFEMKYFQTPYLDGSWDASVDAFLSTDATQDGGNSVDFWSFDDLIGGGF	1485.28	AT1G53910.3	4e-83	RAP2.12	related to AP2 12	TF	g2202237032S415589-PHIS2-LDOX-2-56_T7.seq	ethylene-responsive transcription factor RAP2-12
LOC18784056	PRUPE_3G209900	ATGGAGAACTTCCCAATCATCAACTTGGAGGGCCTCAATGGAGAGGGAAGAAAAGCAACAATGGAAAAAATCAAAGATGCCTGTGAGAACTGGGGCTTCTTTGAGCTTGTGAGTCATGGGATACCAACTGAGTTTTTGGACACAGTGGAGAGGTTGACAAAAGAACACTACAGGCAGTGCTTGGAGCAGAGGTTCAAGGAGCTGGTGGCCAGCAAGGGCCTCGAGGCTGTCAAGACAGAGGTCAATGATATGGACTGGGAAAGCACCTTCTACTTGCGCCATCTTCCAAAATCTAACATATCTGAAGTTCCAGATCTTGAGGATCAGTACAGGAATGTGATGAAGGAATTTGCATTGAAGTTGGAGAAATTAGCAGAGCAGCTCCTAGACTTGCTCTGT…	MENFPIINLEGLNGEGRKATMEKIKDACENWGFFELVSHGIPTEFLDTVERLTKEHYRQCLEQRFKELVASKGLEAVKTEVNDMDWESTFYLRHLPKSNISEVPDLEDQYRNVMKEFALKLEKLAEQLLDLLCENLGLEQGYLKKAFYGTNGPTFGTKVSNYPPCPNPELIKGLRAHTDAGGLILLFQDDKVSGLQLLKDGQWIDVPPMRHSIVINLGDQLEVITNGKYKSVEHRVIAQTDGTRMSIASFYNPGSDAVIYPAPTLVEKEAEEKNQVYPKFVFEDYMKLYAGLKFQPKEPRFEAMKAVETNISLGPIATA	2154.27	AT1G05010.1	0	EFE, ACO4, EAT1	ethylene-forming enzyme		g2202237001S415589-PHIS2-LDOX-2-25_T7.seq	1-aminocyclopropane-1-carboxylate oxidase
LOC18784145	PRUPE_3G201000	ATGGCAACCTCTGCAATCCAACAATCAGCATTTGCTGGCCAGACTGCTTTGAAGCAGTCAAATGAGCTCATCCGAAAGATTGGCGGCCTTGGTGGCGGCCGCATCACCATGAGGCGCACCGTCAAAAGCACCCCCCAAAGCATATGGTATGGCCCAGACCGCCCAAAATACTTGGGACCATTCTCTGAGCAAACTCCATCATACTTGACTGGTGAATTCCCTGGTGACTACGGATGGGACACTGCTGGACTATCCGCAGACCCTGAGACATTTGCCAAAAACCGTGAGCTTGAGGTGATCCACAGCCGATGGGCCATGCTTGGTGCACTGGGATGTGTCTTCCCAGAAATCCTGTCAAAGAATGGTGTCAAGTTCGGCGAGGCTGTTTGGTTCAAGGCT…	MATSAIQQSAFAGQTALKQSNELIRKIGGLGGGRITMRRTVKSTPQSIWYGPDRPKYLGPFSEQTPSYLTGEFPGDYGWDTAGLSADPETFAKNRELEVIHSRWAMLGALGCVFPEILSKNGVKFGEAVWFKAGSQIFSEGGLDYLGNPNLVHAQSILAIWAVQVVLMGFVEGYRVGGGPLGEGLDPLYPGGAFDPLGLADDPEAFAELKVKELKNGRLAMTSMFGFFVQAIVTGKGPVENLYDHVADPVANNAWAYATNFVPGK	4164.79	AT2G05070.1	0	LHCB2.2, LHCB2	photosystem II light harvesting complex gene 2.2		g2202237064S415589-PHIS2-LDOX-2-88_T7.seq	chlorophyll a-b binding protein 151, chloroplastic
LOC18784267	PRUPE_3G191900	ATGGCCACACAAGCTCTGGTATCATCTTCATCCTTAACAGCCTCAAAGGAGGCTGCAAGGCATTTACTAGGAGGAAAGGCAGTCCAATCTCCATTTGGGTCAAGAAAATCTGCTTCCTTTGTAGTCAGGGCAGCCTCTACACCCCCTGTTAAGCAAGGAGCAGACAGACAATTGTGGTTTGCATCCAAGCAGAGCCTTACTTACTTGGATGGCAGCCTTCCTGGTGACTTTGGATTTGATCCGTTGGGGCTGTCTGACCCGGAAGGCACAGGAGGGTTCATTGAGCCGAGATGGCTAGCGTATGGAGAGGTCATCAATGGACGTTATGCCATGCTGGGTGCAGTTGGTGCCATAGCACCAGAGATTCTTGGAAAGCTTGGCCTAATCCCACCAGAGACA…	MATQALVSSSSLTASKEAARHLLGGKAVQSPFGSRKSASFVVRAASTPPVKQGADRQLWFASKQSLTYLDGSLPGDFGFDPLGLSDPEGTGGFIEPRWLAYGEVINGRYAMLGAVGAIAPEILGKLGLIPPETALPWFQTGVIPPAGTYNYWADPYTLFVFELALMGFAEHRRFQDWYNPGSMGKQYFLGLEKYLGGSGDPAYPGGPLFNPLGFGKDEKSLKDLKLKEVKNGRLAMLAILGYFIQGLVTGVGPFQNLLDHLADPVNNNVLTSLKFH	363.94	AT1G61520.3	4e-162	LHCA3	photosystem I light harvesting complex gene 3		g2202237064S415589-PHIS2-LDOX-2-88_T7.seq	chlorophyll a-b binding protein 8, chloroplastic
LOC18784386	PRUPE_3G315500	ATGGCTTCGGCTATTCTTTCTGTGGCCAAACCATCTCTTCAGGCAAATGGAAAGGGATTTGCAGAATTCTCAGGTCTCCGGACCTCATCAGCTTGCCTTCCTTTTGGAAGGAAGACCTCAGACGATTTGTTTTCAGTCATTTCCTTCCAGACCTCTGCTGTGGGAAGCAGCGGAGGATACAAAAAAGGGATAGCGGAGGCGAAGCTAAAGGTGGCTATAAATGGATTCGGAAGAATTGGAAGGAACTTCTTGAGGTGCTGGCATGGGCGCAAGGACTCCCCTCTTGATGTCGTTGTCATCAACGACACTGGAGGCGTGAAGCAGGCCTCCCACCTCCTCAAGTACGACTCTACACTTGGAATCTTCGATGCTGATGTCAAGCCCGCTGGTGATAATGGC…	MASAILSVAKPSLQANGKGFAEFSGLRTSSACLPFGRKTSDDLFSVISFQTSAVGSSGGYKKGIAEAKLKVAINGFGRIGRNFLRCWHGRKDSPLDVVVINDTGGVKQASHLLKYDSTLGIFDADVKPAGDNGISVDGKVIKVVSSRNPLDLPWKDLEIDLVIEGTGVFVDREGAGKHLQAGAKKVLITAPGKGDIPTYVVGVNADAYSPDETIISNASCTTNCLAPFVKVLDQKFGIIKGTMTTTHSYTGDQRLLDASHRDLRRARAAALNIVPTSTGAAKAVALVLPSLKGKLNGIALRVPTPNVSVVDLVVQVTKKTFAEEVNAAFRDSSAKELAGILSVCDEPLVSVDFRCTDVSSTVDSSLTMVMGDDMVKVIAWYDNEWGYSQRVVDLADIVA…	444.114	AT1G12900.1	0	GAPA-2	glyceraldehyde 3-phosphate dehydrogenase A subunit 2		g2202236990S415589-PHIS2-LDOX-2-14_T7.seq	glyceraldehyde-3-phosphate dehydrogenase A, chloroplastic
LOC18784393	PRUPE_3G287000	ATGGGGCTTACCTTCACGAAGCTCTTCAGCAGGCTCTTTGCCAAGAAAGAAATGCGAATTCTCATGGTGGGTCTCGATGCCGCTGGTAAGACGACCATATTGTATAAGCTCAAGCTCGGAGAAATTGTCACCACCATCCCTACCATTGGATTTAATGTGGAGACAGTAGAATATAAGAACATCAGCTTCACTGTGTGGGATGTGGGGGGTCAAGACAAAATCCGTCCATTGTGGAGGCACTACTTCCAGAACACACAAGGTCTTATTTTTGTGGTTGATAGCAATGATAGGGATCGAGTTGTTGAGGCAAGGGATGAATTGCATAGGATGTTGAATGAGGATGAACTGAGGGATGCTGTTCTGCTTGTATTTGCCAACAAACAAGATCTTCCTAATGCA…	MGLTFTKLFSRLFAKKEMRILMVGLDAAGKTTILYKLKLGEIVTTIPTIGFNVETVEYKNISFTVWDVGGQDKIRPLWRHYFQNTQGLIFVVDSNDRDRVVEARDELHRMLNEDELRDAVLLVFANKQDLPNAMNAAEITDKLGLHSLRQRHWYIQSTCATSGEGLYEGLEWLSNNIASKA	14940.7	AT1G10630.1	6e-132	ATARFA1F, ARFA1F	ADP-ribosylation factor A1F		g2202237049S415589-PHIS2-LDOX-2-73_T7.seq	ADP-ribosylation factor 2
LOC18784751	PRUPE_2G115200	ATGGCTCCCGTTTCGGCTCTCGCCAAGTACAAGCTCGTCTTCTTGGGGGACCAGTCCGTCGGCAAAACCAGCATCATCACTCGCTTCATGTACGACAAGTTCGACAACACGTATCAGGCTACCATCGGCATTGATTTTCTGTCAAAGACAATGTACCTTGAAGATCGAACTGTTCGATTGCAGCTCTGGGATACTGCTGGGCAGGAAAGGTTCAGGAGTCTCATTCCAAGCTATATCAGGGATTCCTCTGTGGCAGTCATTGTATATGATGTTGCAAGCAGGCAATCATTCCTAAACACTTCCAAGTGGATTGAAGAGGTTCGCACTGAGCGGGGAAGTGATGTTATCATTGTACTTGTTGGAAACAAAACAGATCTTGTAGACAAAAGGCAAGTTTCC…	MAPVSALAKYKLVFLGDQSVGKTSIITRFMYDKFDNTYQATIGIDFLSKTMYLEDRTVRLQLWDTAGQERFRSLIPSYIRDSSVAVIVYDVASRQSFLNTSKWIEEVRTERGSDVIIVLVGNKTDLVDKRQVSIEEGEAKARELNVMFIETSAKAGFNIKALFRKIAAALPGMETLSSTKQEDMVDVNLKSSNANSSESQAQSGGCAC	230.237	AT2G44610.1	2e-147	RAB6, ATRABH1B, ATRAB6A, RAB6A	Ras-related small GTP-binding family protein		g2202237049S415589-PHIS2-LDOX-2-73_T7.seq	ras-related protein RABH1b
LOC18785293	PRUPE_2G213600	ATGGCCAAGGACGTTGAAGTTGCAGAGAGAGGCTCTTTCTCGGCCAAGGACTACCATGACCCACCTCCTGCACCACTCTTCGATGCAGTGGAGCTCACCAAATGGTCCTTTTACAGAGCTCTCATAGCTGAGTTCATAGCCACTCTTCTTTTCCTCTATGTCACTGTGCTTACCGTGATTGGGTACAAGAGCCAGACAGATACAACTGTCAATGCTGACGCTTGTGGTGGGGTTGGGATTCTGGGTATTGCTTGGGCCTTTGGGGGCATGATCTTTGTCCTTGTTTACTGCACTGCTGGGATTTCAGGAGGTCACATTAACCCTGCAGTGACATTTGGGCTGTTCTTGGCTCGCAAGGTTTCGCTGGTCAGAGCTGTTTTGTACATGGTGGCTCAGTCT…	MAKDVEVAERGSFSAKDYHDPPPAPLFDAVELTKWSFYRALIAEFIATLLFLYVTVLTVIGYKSQTDTTVNADACGGVGILGIAWAFGGMIFVLVYCTAGISGGHINPAVTFGLFLARKVSLVRAVLYMVAQSLGAIAGVALVKAFQESYYTKYGGGANELSQGYSKGVGLGAEIIGTFVLVYTVFSATDPKRSARDSHVPVLAPLPIGFAVFIVHLATIPITGTGINPARSLGAAVIYNKEKAWDDQWIFWVGPFIGAAIAAFYHQFILRAGAVKALGSFRSNPHV	828.815	AT3G54820.1	9e-178	PIP2D, PIP2;5	plasma membrane intrinsic protein 2;5		g2202237057S415589-PHIS2-LDOX-2-81_T7.seq	probable aquaporin PIP2-5
LOC18785337	PRUPE_2G247300	ATGGAGGGCAAGGAAGAGGATGTCAAGTTGGGAGCCAACAAGTTTTCGGAGAGGCAGCCGATTGGGACGTCGGCTCAGACCCAAGATGAAGGCAAGGACTACAAGGAGCCGCCACCGGCGCCGCTGTTCGAGCCCGGTGAGCTGACGTCATGGTCGTTTTACAGGGCTGGGATCGCCGAGTTCATCGCCACCTTCCTTTTCCTGTACATCACCATTTTGACGGTGATGGGCGTCGTCAAGTCTCCGTCAAAGTGCTCGACGGTCGGGATTCAAGGGATCGCTTGGGCTTTCGGCGGTACCATCTTCGCCCTAGTTTACAGCACAGCCGGCATCTCAGGGGGTCACATAAACCCGGCGGTGACGTTCGGGCTGTTTTTGGCCCGGAAGCTGTCGCTGACA…	MEGKEEDVKLGANKFSERQPIGTSAQTQDEGKDYKEPPPAPLFEPGELTSWSFYRAGIAEFIATFLFLYITILTVMGVVKSPSKCSTVGIQGIAWAFGGTIFALVYSTAGISGGHINPAVTFGLFLARKLSLTRAVFYIVMQTLGAIAGAAVVKGFEKSRNFELLGGGANSVAHGYTKGSGLGAEIVGTFVLVYTVFSATDAKRSARDSHVPILAPLPIGFAVFLVHLATIPITGTGINPARSLGAAIIYNKKHAWDDHWIFWVGPFIGAALAALYHVVVIRAIPFKSKS	4676.92	AT4G00430.1	0	TMP-C, PIP1;4, PIP1E	plasma membrane intrinsic protein 1;4		g2202237057S415589-PHIS2-LDOX-2-81_T7.seq	probable aquaporin PIP1-4
LOC18785430	PRUPE_2G263600	ATGGCTTTTACCTCACACTTAGCCATTGCTCTTCTGTTCTCTGTTCTCAATCTATGTCTTCAAGGCACTTATGGTGACTATGGAGGAGGATGGGAAGGTGGTCATGCCACATTTTATGGTGGGGGTGATGCCTCTGGCACAATGGGAGGTGCTTGTGGATATGGAAATTTGTATAGCCAAGGGTATGGAACCAACACTGCAGCTCTCAGCACAGCTCTGTTCAACGATGGCTTGAGCTGTGGGTCTTGTTATGAGATGAGATGTGACAGTGACCCCAAATGGTGCCTCCCCGGCAGCATCATCGTCACTGCCACAAACTTCTGCCCTCCTAACTTAGCTCAGTCTAATGACAATGGTGGCTGGTGCAACCCTCCTCTCCAGCACTTTGATTTGGCTGAG…	MAFTSHLAIALLFSVLNLCLQGTYGDYGGGWEGGHATFYGGGDASGTMGGACGYGNLYSQGYGTNTAALSTALFNDGLSCGSCYEMRCDSDPKWCLPGSIIVTATNFCPPNLAQSNDNGGWCNPPLQHFDLAEPAFLQIAQYRAGIVPVSFRRVSCVKKGGIRFTINGHSYFNLVLITNVGGAGDVHSVSIKGSKTGWQAMSRNWGQNWQSNSYLNGQALSFQVTTSDGRTVTSNAVPANWQFGQTFSGGQF	558.395	AT2G40610.1	4e-146	ATEXPA8, EXP8, ATEXP8, ATHEXP ALPHA 1.11, EXPA8	expansin A8		g2202237048S415589-PHIS2-LDOX-2-72_T7.seq	expansin-A8
LOC18786880	PRUPE_2G171200	ATGGAAGGGAAAGAAGAAGATGTGAGGCTGGGAGCCAACAAATTCTCAGAGAGGCAGCCCATAGGGACATCTGCACAGACAGACAAGGACTACAAGGAGCCACCACCAGCACCTCTGTTTGAGCCTGGTGAGCTCAAGTCCTGGTCTTTTTGGAGGGCTGGAATTGCTGAGTTCATAGCCACCTTCTTGTTCCTCTACATCACTGTCTTGACTGTCATGGGTGTTTCTAGATCTCGCAGCAAGTGTTCTACTGTGGGTATTCAGGGCATTGCTTGGGCCTTTGGTGGTAGCATCTTTGCCCTTGTTTACTCCACTGCTGGTATCTCAGGTGGTCACATAAACCCAGCCGTGACATTTGGTCTCTTCCTAGCAAGGAAGCTCTCCCTGACCAGAGCTGTA…	MEGKEEDVRLGANKFSERQPIGTSAQTDKDYKEPPPAPLFEPGELKSWSFWRAGIAEFIATFLFLYITVLTVMGVSRSRSKCSTVGIQGIAWAFGGSIFALVYSTAGISGGHINPAVTFGLFLARKLSLTRAVFYIVMQTLGAIAGAGVVKGFQKNQYELLGGGANVVNHGYTKGDGLGAEIVGTFVLVYTVFSATDAKRNARDSHVPILAPLPIGFAVFLVHLATIPITGTGINPARSLGAAIIYNKDRAWDDHWIFWVGPFIGAALAALYHQIIIRAIPFKTRD	756.773	AT2G45960.1	0	PIP1B, TMP-A, ATHH2, PIP1;2	plasma membrane intrinsic protein 1B		g2202237057S415589-PHIS2-LDOX-2-81_T7.seq	aquaporin PIP1-2
LOC18787018	PRUPE_2G248900	ATGGCCACCACCACAGCCGCTGTCACTACCTACTTCTTCGGAGCCCGCCTCCCAAACCCCGGACCCAGTTTCGGGAGATTCCAAGCCCGATTCGGAAACTTCGGCGGCTTCAGCTTAGGCACCAAGAAGTCACCGCCACCTCCACCACCAAAACAAAAGCAGAAATTTGACGACGGGGAACGACCCGTATGGTTCCCGGGTGCCGAACCGCCCGAGTGGCTCGACGGGTCGCTGGTCGGGGACCGGGGGTTCGATCCGTTCGGGCTCGGGAAGCCCGCGGAGTACTTGCAGTTCGATTACGACGGGCTGGACCAGAACTTGGCGAAGAATGTGGCGGGTGATGTGATCGGGACCCGGATCGAGACGGCAGAGGTGAATCCGACGCCGTTTCAGCCGTAC…	MATTTAAVTTYFFGARLPNPGPSFGRFQARFGNFGGFSLGTKKSPPPPPPKQKQKFDDGERPVWFPGAEPPEWLDGSLVGDRGFDPFGLGKPAEYLQFDYDGLDQNLAKNVAGDVIGTRIETAEVNPTPFQPYSEVFGLQRFRECELIHGRWAMLGALGALAVEGLTGVAWQDAGKVELIEGSSYLGLPLPFSITTLIWIEVLVIGYIEFQRNAELDPEKRLYPGGKFFDPLGLASDPEEKERLQLAEIKHARLAMVVFLIFGIQAAVTGKGPVSFVATFNK	252.002	AT2G40100.1	4e-143	LHCB4.3	light harvesting complex photosystem II		g2202237064S415589-PHIS2-LDOX-2-88_T7.seq	chlorophyll a-b binding protein CP29.3, chloroplastic
LOC18787068	PRUPE_2G323200	ATGGTGAAGCACAACAACGTTATCCCTAGCTCCCACTTCAGGAAACATTGGCAGAATTATGTCAAGACTTGGTTTAACCAACCTGCCAGGAAGACCAGGAGAAGAACTGCTCGCCAAAAGAAGGCTGTCAAAATCTTCCCTCGCCCAACTGCTGGACCTCTCCGTCCAATTGTTCATGGACAGACTTTGAAGTATAACATGAAAATTAGGGCTGGTAGGGGCTTTACTTTGGAAGAGTTGAAGTCTGCTGGGATACCAAAGAAACTTGCACCAACCATTGGGATCGCAGTTGATCATCGTAGGAAGAATCGTTCTCTTGAGGGTCTTCAAGCTAATGTGCAGCGACTGAAGACATACAAGGCCAAATTAGTTGTCTTCCCAAGACGTGCTGGCAAATTC…	MVKHNNVIPSSHFRKHWQNYVKTWFNQPARKTRRRTARQKKAVKIFPRPTAGPLRPIVHGQTLKYNMKIRAGRGFTLEELKSAGIPKKLAPTIGIAVDHRRKNRSLEGLQANVQRLKTYKAKLVVFPRRAGKFKAGDSAPEELANATQLQGSYLPIAREKPSVELVKVTDDLKSFKAYDKLRVERMNQRHVGARLKKAAEAEKEEKK	721.853	AT3G49010.3	9e-121	ATBBC1, BBC1, RSU2	breast basic conserved 1		g2202236996S415589-PHIS2-LDOX-2-20_T7.seq	60S ribosomal protein L13-3
LOC18787179	PRUPE_2G309500	ATGGGGAAGAAAGGAAGCAGCTGGTTTTCGTCAGTTAAGAAAGTTTTCAAAAGTTCTTCTAAGGACTCACCGGACAAAAAGAAGGAATTAACTGGGGAGAAATGGCAGCAACATGATGCGGCAGAGGTTGTGTCGTTTGAACATTTTCCTGCAGAGAGTTCACCGGACATCACCAACGACGAGTGCACCACTGTATCATCAACTCCTCTCAATTCTGATAAAGATAGAAACCATGCCATTGCTGTTGCAGTGGCAACCGCTGCCGCTGCTGAAGCTGCTGTTGTCGCAGCACAAGCCGCCGCTAAAGTTGTTCGATTGGCCGGCTATGGACGCCACTCTAAGGAAGAAAGAGCTGCAACTCTCATACAGTCACATTACAGAGGCTACCTAGCTCGACGT…	MGKKGSSWFSSVKKVFKSSSKDSPDKKKELTGEKWQQHDAAEVVSFEHFPAESSPDITNDECTTVSSTPLNSDKDRNHAIAVAVATAAAAEAAVVAAQAAAKVVRLAGYGRHSKEERAATLIQSHYRGYLARRARRALKGLVRLQALVRGHNVRKQAQMTMRCMQALVRVQARVRARRLQLTKGKLHNKADQDQYYDEDDDDEQERRAFMEEAEEQKLMSPAKKYEMQSRNGTTRHQSFKENASKKHDAEVKRERALAYAYSYQKQQQLLQPTHDGTEFGLQPNQSDKAQWGWNWLERWMSSQPNQARPSGPRDTSFGTNITTTTTTDNMSEKTVEMDTVAASSSPHINMGLLNQDMIDSNPYSTRQHRRQSSNNVPSYMAPTQSAKAKARGLGLGKQR…	228.132	AT3G49260.3	6e-107	iqd21	IQ-domain 21		g2202237033S415589-PHIS2-LDOX-2-57_T7.seq	protein IQ-DOMAIN 1
LOC18787398	PRUPE_2G114000	ATGGGAACAGTTGTTGATGCTGCTGCTAAGAAGGAGGCTAATGGAAGCTTAGCTGATCTGAACCCTACAGTTGTTTTTGTATTGGGTGGCCCTGGCAGCGGAAAGGGTACCCAATGTGCAAACATTGTTCAGCACTTTGGGTATACCCATCTCAGTGCTGGTGATCTTCTACGAGCTGAAATCAAATCTGGTTCTGAAAATGGGACCATGATTTCAAATATGATTAAAGAAGGAAAGATTGTTCCTTCCGAAGTAACAATTAAACTTCTTCAGCGAGCAATGCTGGAAGGTGGTAATGACAAATTTTTGATTGATGGGTTTCCTCGTAATGAAGAAAATCGTGCCGCATTTGAGGATGTGACTAAAATCGAGCCTTCATTTGTCCTGTTTTTTGACTGT…	MGTVVDAAAKKEANGSLADLNPTVVFVLGGPGSGKGTQCANIVQHFGYTHLSAGDLLRAEIKSGSENGTMISNMIKEGKIVPSEVTIKLLQRAMLEGGNDKFLIDGFPRNEENRAAFEDVTKIEPSFVLFFDCSEEEMERRLLGRNQGREDDNIETIRKRFKVFLESSLPVIEYYNSKGKVRKIDAGRPVEEVYESVKAIFAPKNEKVMGHCHALMKCLILFWM	359.252	AT5G26667.1	2e-117	PYR6	P-loop containing nucleoside triphosphate hydrolases superfamily protein		g2202237006S415589-PHIS2-LDOX-2-30_T7.seq	UMP-CMP kinase 3
LOC18788023	PRUPE_3G005200	ATGGGGCTGTCTTTCACGAAGCTTTTCAGTCGGCTCTTTGCCAAGAAAGAGATGCGTATTCTGATGGTGGGTCTCGATGCGGCTGGTAAGACCACCATTCTCTACAAGCTCAAGCTCGGCGAGATCGTCACCACCATTCCCACCATTGGATTCAATGTGGAGACTGTGGAATACAAGAACATCAGCTTTACCGTCTGGGATGTTGGGGGTCAGGACAAGATCCGACCTTTGTGGAGGCATTACTTCCAAAACACACAAGGACTTATCTTTGTGGTTGATAGTAATGATCGTGACCGTGTCGTTGAAGCCAGGGATGAGCTGCACAGGATGTTGAATGAGGATGAGTTGAGGGAGGCTGTCCTCCTTGTATTTGCAAATAAGCAAGATCTTCCAAATGCC…	MGLSFTKLFSRLFAKKEMRILMVGLDAAGKTTILYKLKLGEIVTTIPTIGFNVETVEYKNISFTVWDVGGQDKIRPLWRHYFQNTQGLIFVVDSNDRDRVVEARDELHRMLNEDELREAVLLVFANKQDLPNAMNAAEITDKLGLHSLRQRHWYIQSTCATSGEGLYEGLDWLSNNIANKA	2005.83	AT1G10630.1	7e-132	ATARFA1F, ARFA1F	ADP-ribosylation factor A1F		g2202237049S415589-PHIS2-LDOX-2-73_T7.seq	ADP-ribosylation factor 2
LOC18788104	PRUPE_3G004100	ATGGCAACTATGGCTCTCTCATCCCCATTCACCGGGAAGGCCATTCCTTTAAACACACAGACAGAGTTCTCAACTGTCCAAGGCAATGGTAGAGTTTCTATGAGGAGGGCAGCCAGAAAGCCAGCTGTATCATCAGGCAGCCCCTGGTACGGCCCTGATCGTGTCAAATACCTCGGACCATTCTCTGGTGAGGCGCCATCTTACCTAACCGGCGAATTCCCCGGTGACTATGGTTGGGACACCGCTGGGCTCTCAGCTGACCCTGAAACTTTTGCCAAGAACCGTGAACTCGAGGTTATTCACTCAAGATGGGCAATGCTTGGGGCTTTGGGCTGTGTTTTCCCAGAGCTACTCTCCAGAAATGGAGTCAAGTTTGGTGAGGCAGTGTGGTTCAAAGCT…	MATMALSSPFTGKAIPLNTQTEFSTVQGNGRVSMRRAARKPAVSSGSPWYGPDRVKYLGPFSGEAPSYLTGEFPGDYGWDTAGLSADPETFAKNRELEVIHSRWAMLGALGCVFPELLSRNGVKFGEAVWFKAGAQIFSEGGLDYLGNPSLVHAQSILAIWATQVVLMGAVEGYRIAGGPLGEVTDPLYPGGSFDPLGLADDPEAFAELKVKELKNGRLAMFSMFGFFVQAIVTGKGPIENLADHLADPVNNNAWAYATNFVPGK	2584.56	AT1G29930.1	1e-164	CAB1, AB140, CAB140, LHCB1.3	chlorophyll A/B binding protein 1		g2202237064S415589-PHIS2-LDOX-2-88_T7.seq	chlorophyll a-b binding protein of LHCII type 1
LOC18788237	PRUPE_1G475800	ATGGGGTTTCATCTCCCACTCATCTTTGCTCTTCTCAGTCTAGCAGCAGTGGCACTGGCAAACCATGCTGCTCAACCAGCACCTCAACTTTACTGGAGCTCCGTCCTGCCAAACACACAGATGCCAAGATCTATCAGTGAACTTCTGCATCCTGACTCCACAAATGAAGAAAAGAGCACAAATGACGTTGGCAAACCTGAAACTTTCCCATTGGGCAATCAACATTACTCCAGTCAAAAACATTATGGAGGCATACCTGAAACTTCCCCATTGGGCAATAAACATTACTCCAGTCAAAAACATTATGGAAGAGGCAAACCTGAAACTTTCCCATTGGGCAATCAGCATTACTCCAGTCAAAGACATTATGGAAGAGGCAAACCTGAAACTTTCCCATTG…	MGFHLPLIFALLSLAAVALANHAAQPAPQLYWSSVLPNTQMPRSISELLHPDSTNEEKSTNDVGKPETFPLGNQHYSSQKHYGGIPETSPLGNKHYSSQKHYGRGKPETFPLGNQHYSSQRHYGRGKPETFPLGNKHYSSQKHYGRGKPETFPLGNQHYSSQKKYGRGASPSDNQQLHYKDLAIFFLEKDMRPGTTMKFQFPINSNTATFLPRESAQSIPFSSNKLPEIFNHFSVKPTSEEAKTIKQTIEECEAPDLKGEEIYCATSLESMVDFSTSKLGTRNVEAISTEVLEKGATMSIQNYTTMPGLKKLAGDKVVVCHKQNYPYAVFFCHAIKHTAAYALSLKGDDGEKVKAVTICHLDTSEWDPEHMSFQIVNVKPGTIPICHFISTDAIAWVPN…	4403.82	AT5G25610.1	2e-72	RD22, ATRD22	BURP domain-containing protein		g2202236980S415589-PHIS2-LDOX-2-4_T7.seq	BURP domain protein RD22
LOC18788313	PRUPE_1G573600	ATGGCAGCTCTCTCTGGCACCATGGTGAGCACCTCCTTCATCCGCGGCCAGCCGATGACCAGCCTACGGTTAGCCCCCAACATGGGCCAGGCTCTTTTCGGGTTGAAGGCCAACCGTGGAGGGCGTGTGACAATGGCTGCTTTCAAGGTGAAGCTGCTGACACCAGATGGGCCCCAAGAGTTTGAGTGCCCGGATGATGTTTACATTCTTGACGCTGCGGAGGAGGCCGGTATCGACCTACCCTACTCTTGCAGGGCTGGTTCTTGCTCTTCATGTGCTGGCAAAGTTGTGGAAGGGGGTGTAGACCAGTCAGATCAGAGCTTCCTTGATGATGAACAGATTGATGGTGGATTTGTCCTTACTTGTGTGGCTTATCCTTCATCTGATGTTGTGCTTGAG…	MAALSGTMVSTSFIRGQPMTSLRLAPNMGQALFGLKANRGGRVTMAAFKVKLLTPDGPQEFECPDDVYILDAAEEAGIDLPYSCRAGSCSSCAGKVVEGGVDQSDQSFLDDEQIDGGFVLTCVAYPSSDVVLETHKEEELTG	1403.47	AT1G60950.1	6e-64	FED A, ATFD2	2Fe-2S ferredoxin-like superfamily protein		g2202237000S415589-PHIS2-LDOX-2-24_T7.seq	ferredoxin
LOC18788518	PRUPE_1G234000	ATGGGATCTGACAAGAAGATCAAGATCGGAATCAACGGGTTCGGAAGAATCGGTCGTTTGGTTGCTAGAGTTGCTCTTCAGAGAGACGATGTTGAGCTCGTTGCTGTTAACGATCCCTTCATCACCACCGACTACATGACCTACATGTTCAAGTATGACACCGTTCACGGCCCGTGGAAGCACCATGAGCTCAAGGTCAAGGACTCCAAGACCCTTCTCTTTGGCGAGAAGCCCGTCGCTGTTTTTGGGATCAGGAACCCAGAGGAGATCCCATGGGGCGAGGCCGGTGCTGATTTCATTGTGGAGTCCACTGGAGTTTTCACCGACAAGGACAAAGCTGCTTTCCACTTGAAGGGTGGTGCCAAGAAGGTTATCATCTCTGCCCCAAGTAAGGATGCT…	MGSDKKIKIGINGFGRIGRLVARVALQRDDVELVAVNDPFITTDYMTYMFKYDTVHGPWKHHELKVKDSKTLLFGEKPVAVFGIRNPEEIPWGEAGADFIVESTGVFTDKDKAAFHLKGGAKKVIISAPSKDAPMFVVGVNEKEYKPDIDILSNASCTTNCLAPLAKVINDRFGIVEGLMTTVHSITATQKTVDGPSSKDWRGGRAASFNIIPSSTGAAKAVGKVLPQLNGKLTGMAFRVPTVDVSVVDLTVRIEKKATYEQIKAAIKEESEGKLKGILGYTEDDVVSTDFIGDSRSSIFDAKAGIALNDNFVKLVSWYDNEWGYSSRVVDLIVHVASTL	3615.06	AT1G13440.1	0	GAPC-2, GAPC2	glyceraldehyde-3-phosphate dehydrogenase C2		g2202236990S415589-PHIS2-LDOX-2-14_T7.seq	glyceraldehyde-3-phosphate dehydrogenase, cytosolic
LOC18789001	PRUPE_1G086800	ATGTATACGTCAAGGAACAGGATCCATAAAGACAAGGGTGCTGAACCCACTGAGTTTGAAGAGTCGGTTGCGCAAGCAATCTTTGATTTGGACAATGCAGGCACAGATCTGAAAAGTGAATTGAAGGATCTCTATATTAATTCTGCTGTTCAAGTTGATGTGGCTGGGAACCGGAAGGCTGTTGTTATTCATATACCATATAGACTGAGGAAGGCTTATCGCAAGATCCATGTTAGGCTCGTGAGGGAGCTAGAGAAGAAATTCAGTGGAAAGGATGTGATCCTGATTGCCACACGGAGGATAGTGAGGCCTCCAAAGAAAGGCTCTGCTGCTCAACGACCCCGCACTCGTACCCTAACTGCTGTGCACGAGGCAATGTTGGAGGACGTTGTTTTGCCT…	MYTSRNRIHKDKGAEPTEFEESVAQAIFDLDNAGTDLKSELKDLYINSAVQVDVAGNRKAVVIHIPYRLRKAYRKIHVRLVRELEKKFSGKDVILIATRRIVRPPKKGSAAQRPRTRTLTAVHEAMLEDVVLPAEIVGKRTRYRLDGSKIMKVFLDPKERNNTEYKLESFSAVYRKLSGKDVVFEYPITDA	319.548	AT1G48830.2	7e-114		Ribosomal protein S7e family protein		g2202237055S415589-PHIS2-LDOX-2-79_T7.seq	40S ribosomal protein S7-1
LOC18789050	PRUPE_1G473000	ATGGCTCTTCCGAATCAGCAAACTGTCGATTACCCTAGCTTCAAGCTTGTTATCGTCGGCGACGGTGGAACTGGCAAGACCACGTTTGTGAAACGCCATCTCACTGGAGAGTTTGAGAAGAAATACGAACCAACTATTGGTGTTGAAGTTCATCCGTTGGACTTCTTCACAAACTGTGGGAAGATCAGGTTCTACTGTTGGGACACCGCTGGTCAGGAGAAGTTTGGTGGACTCAGAGATGGTTATTATATTCATGGGCAGTGTGCAATCATCATGTTTGATGTTACTGCTCGTTTGACATACAAAAATGTCCCCACATGGCACCGTGATCTCTGCAGGGTGTGTGAGAACATTCCCATTGTTCTGTGCGGAAACAAGGTGGATGTGAAAAATAGGCAG…	MALPNQQTVDYPSFKLVIVGDGGTGKTTFVKRHLTGEFEKKYEPTIGVEVHPLDFFTNCGKIRFYCWDTAGQEKFGGLRDGYYIHGQCAIIMFDVTARLTYKNVPTWHRDLCRVCENIPIVLCGNKVDVKNRQVKAKQVTFHRKKNLQYYEISAKSNYNFEKPFLYLARKLAGETELRFVESPALAPPEVQIDMAVQAKHEQELAQAAAQPLPDDDDDLFE	207.228	AT5G55190.1	5e-159	RAN3, ATRAN3	RAN GTPase 3		g2202237049S415589-PHIS2-LDOX-2-73_T7.seq	GTP-binding nuclear protein Ran-3
LOC18789641	PRUPE_1G152400	ATGTTGGGAGTTTTCAGCAGCGCGATCGTATCGCCGCCGGACGAGCTGGTGGCCGCCGGCAGCCGCACTCCGTCTCCAAAGATAACGGCGGCGGCGCTGGTCAACCGCTTCGTCCAGAACAATGGGAACGCCGTGTCCGTACAGGTCGGCGACCATGCTCAGCTAGCCTACAGCCACAGCAACGAGTCAGCGTTACAGCCGAGGTCATTTGCAGTGAAGGATGAGATATTCTGCTTGTTTGAGGGAGCCCTTGACAACTTGGGAAGCTTGAGGCAGCAATATGGACTAGCCAAGTTTGCAAATGAAGTGCTTTTGGTGATTGAGGCCTACAAGGCACTGCGAGACCGGGCCCCCTACCCACCTAACCATGTGGTTGGCCACCTCAGTGGAAATTTTGCT…	MLGVFSSAIVSPPDELVAAGSRTPSPKITAAALVNRFVQNNGNAVSVQVGDHAQLAYSHSNESALQPRSFAVKDEIFCLFEGALDNLGSLRQQYGLAKFANEVLLVIEAYKALRDRAPYPPNHVVGHLSGNFAFIVFDKSTSTLFVASDQYGKVPLSWGITADGYVAFADDAELLKGACGKSLASFPQGCFYSTAVGGLRSYENPKNKITAIPATEEEFWGATFKVEGPAVFAATK	1054.22	AT5G19140.1	2e-142	ATAILP1, AILP1	Aluminium induced protein with YGL and LRDR motifs		g2202236993S415589-PHIS2-LDOX-2-17_T7.seq	stem-specific protein TSJT1
LOC18789797	PRUPE_1G472900	ATGGCTTTGCCGAATCAGCAGACCGTGGATTACCCGAGCTTCAAGCTCGTAATCGTTGGCGATGGTGGAACAGGAAAAACTACCTTTGTGAAGAGACATCTTACTGGTGAATTTGAGAAGAAATACGAACCAACTATTGGCGTGGAGGTCCATCCATTGGACTTTTTCACCAACTGTGGAAAAATTAGATTCTATTGCTGGGACACAGCCGGGCAAGAGAAATTTGGTGGTCTTAGAGATGGATACTACATCCATGGACAATGTGCAATTATCATGTTTGATGTTACTGCTCGATTGACATACAAGAATGTTCCGACTTGGCATCGGGATCTTTGCAGGGTCTGTGAGAACATTCCAATTGTTCTTTGTGGAAACAAGGTTGATGTGAAGAACAGGCAG…	MALPNQQTVDYPSFKLVIVGDGGTGKTTFVKRHLTGEFEKKYEPTIGVEVHPLDFFTNCGKIRFYCWDTAGQEKFGGLRDGYYIHGQCAIIMFDVTARLTYKNVPTWHRDLCRVCENIPIVLCGNKVDVKNRQVKAKQVTFHRKKNLQYYEISAKSNYNFEKPFLYLARKLAGDPNLHFVESPALAPPEVHIDLAAQQQHEAELAAAASQPLPDDDDDTFE	4913.52	AT5G55190.1	8e-166	RAN3, ATRAN3	RAN GTPase 3		g2202237049S415589-PHIS2-LDOX-2-73_T7.seq	GTP-binding nuclear protein Ran-3
LOC18790535	PRUPE_1G022400	ATGCTAGCAGTTTTCGACAAATCGGTGGCTAAGAGCCCCGAGGCTCTGCAGAGCCCTCAATCTGGATCAGTCTCGGCTCTGAAAGATGGCTTTCTCGCGCAGCACTTTGCCTCTGTGCACCCTTCTTCTGTCACTGTCAATTTTGGCTCTTCTGGTCTCATCGTCTATTCTCTTGACAAACAGAACCCTCTTCTTCCCAGGCTGTTTGCGGTTGTGGACGACATTTTTTGCCTGTTCCAAGGCCACATTGAGAATGTTGCTCTTCTCAAGCAACAATATGGATTGAACAAGACAGCCAATGAAGTGATCATCATTATTGAAGCATACAGAACTCTGAGAGATCGAGGTCCTTATCCTGCTGATCAGGTTGTGAGAGACATCCAAGGGAAGTTTGCATTT…	MLAVFDKSVAKSPEALQSPQSGSVSALKDGFLAQHFASVHPSSVTVNFGSSGLIVYSLDKQNPLLPRLFAVVDDIFCLFQGHIENVALLKQQYGLNKTANEVIIIIEAYRTLRDRGPYPADQVVRDIQGKFAFILYDSASKATFVAADPDGNVPFFWGTDSEGHLVLADDAEVVKKGCGNSFAPFPKGCFFTSSGGLRSYEHPHNELKAVPRVDSSGQVCGANFKVDAEAKKESSGIPRVGSAANWSTTY	447.94	AT3G22850.1	7e-139		Aluminium induced protein with YGL and LRDR motifs		g2202236993S415589-PHIS2-LDOX-2-17_T7.seq	stem-specific protein TSJT1
LOC18790935	PRUPE_1G477400	ATGGGGTTTCATCTCCCACTCATCTTTGCTATTCTCAGTCTAGCAGCGGTTGCACTGGCAAACAATGCTGCTCAACCAGCACCTCAACTTTACTGGAACTCCGTCCTGCCAAACACACAGATGCCAAGATCTATCAGTGAACTTCTGCATCCTGACTCCACAAATGAAGAAAAGAGCAAACCTGAAATTTTCCCATTGCAGGGCAATAGAGTTTACACTCAAAGCCATTATAAAAAACGTCCTCCTCCTCCATCTGACGAGGGCAAACCTGAAAATTTCCCATTGGCCAATAGCTTTTACACTCAAACCCATTATAAAAAACGTCCTCCTCCTCCATCTGACGAGGGCAAACCTGAAAATTTCCCATTGGGCAATAGCCATTATTCTCAAACAGGGTAT…	MGFHLPLIFAILSLAAVALANNAAQPAPQLYWNSVLPNTQMPRSISELLHPDSTNEEKSKPEIFPLQGNRVYTQSHYKKRPPPPSDEGKPENFPLANSFYTQTHYKKRPPPPSDEGKPENFPLGNSHYSQTGYAKGPPPPPKIFPFSGYSRKRYGGSPPPPSPFVQKDYGQNDKHYVQKNYGKVPPPPDNQLLHYKDLAIFFFEKDMRPGATMKFQFPRNSNTATFLPRESAQSIPFSSKKLPEIFNHFSVKPTSEEAKTIKQTIEECEAPGLKGEEKYCATSLESMVDFSTSKLGTRNVEAISTEVLEEGATKYMHNYTTMPGLKKLEGDKVVVCHKENYPYAVFFCHAIKQTAAYVLSLKADDGMKVKAVTICHLDTSEWDPEHLSFQILNVKPGTT…	2676.41	AT5G25610.1	5e-71	RD22, ATRD22	BURP domain-containing protein		g2202236980S415589-PHIS2-LDOX-2-4_T7.seq	BURP domain-containing protein 5
LOC18791104	PRUPE_1G477800	ATGGGGTTTCATCTCCCACTCATCGTTGCTATTCTCAGTCTAGCAGCGGTTGCACTGGCAAACAATGCTGCTCAACCAGCACCTCAACTTTACTGGAACTCCGTCCTGCCAAACACACAGATGCCAAGATCTATCAGTGAACTTCTGCATCCTGACTCCACAAATGAAGAAAAGAGCAAACCTGAAAATATCCCATTGGCACGTTCAGGTTACAGTCGAAAAAGGTATGGAGGAGGTCCTCCTCCATCTGACGAGGGCAAACCTGAAAGTATCCCATTGAGAAATTCAGGTTACCAACGAAAAAATTATGGAGGACGTCCTCCTCCATCTGACGAGGGCAAACCTGAAAGTATCCCATTGAGAAATTCAGGTTACCAACGAAAAAATTATGGAGGACGT…	MGFHLPLIVAILSLAAVALANNAAQPAPQLYWNSVLPNTQMPRSISELLHPDSTNEEKSKPENIPLARSGYSRKRYGGGPPPSDEGKPESIPLRNSGYQRKNYGGRPPPSDEGKPESIPLRNSGYQRKNYGGRPPPSDEGKPESIPLRNSGYQRKNYGGRPPPSDEGKPESIPLRNSGYQRKNYGGRPPPSDEGKPESIPLRNSGYQRKNYGGRPPPSDEEKPESIPLRNSGYQRKNYGGRPPPSDEGKPESIPLRNSGYQRKNYGGRPPPSDEGKPESVPLRNSGYQRKNYGGRPPPSDSQLLHYRDLAIFFFEKDMRPGSTMQFQFPRNSNTATFLPRESAQSIPFSSNKLSEIFNHFSVKPTSVEAKTIKQTIEECEAPGLKGEEKYCATSLESMV…	5462.5	AT5G25610.1	6e-69	RD22, ATRD22	BURP domain-containing protein		g2202236980S415589-PHIS2-LDOX-2-4_T7.seq	BURP domain-containing protein 17
LOC18791123	PRUPE_1G477200	ATGGGGTTTCATCTCCCACTCATCTTTGCTATTCTCAGTCTAGCAGCGGTTGCACTGGCAAACAATGCTGCTCAACCAGCACCTCAACTTTACTGGAACTCCGTCCTGCCAAACACACAGATGCCAAGATCTATCAGTGAACTTCTGCATCCTGACTCCACAAATGAAGAAAAGAGCAAACCTGAAATTTTCCCATTGCAGGGCAATAGAGTTTACACTCAAAGCCATTATAAAAAACGTCCTCCTCCTCCATCTGACGAGGGCAAACCTGAAAATTTCCCATTGCAGGGCAATAGAGTTTACACTCAAAGCCATTATAAAAAACGTCCTCCTCCTCCATCTGACGAGGGCAAACCTGAAAATTTCCCATTGGCCAATAGCTTTTACACTCAAACCCAT…	MGFHLPLIFAILSLAAVALANNAAQPAPQLYWNSVLPNTQMPRSISELLHPDSTNEEKSKPEIFPLQGNRVYTQSHYKKRPPPPSDEGKPENFPLQGNRVYTQSHYKKRPPPPSDEGKPENFPLANSFYTQTHYKKRPPPPSDEGKPENFPLANSFYTQSHYKKRPPPPSDEGKPENFPLGNSHYTQSHYKKRPPPPSDEGKPENIPLARSGYQRKNYGASPPPSDSQLKHYKDLAIFFFEKDMRPGTTMKFQFPRNSNTATFLPRESAQSIPFSSKKLPEIFNHFSVKPTSEEAKTIKQTIEECEAPGLKGEEKYCATSLESMVDFSTSKLGTRNVEAISTQVLEEGATKYMHNYTTIPGLKKLVGDKVVVCHKENYPYAVFLCHAIKQTEAYVLSLK…	7991.42	AT5G25610.1	1e-69	RD22, ATRD22	BURP domain-containing protein		g2202236980S415589-PHIS2-LDOX-2-4_T7.seq	BURP domain protein RD22
LOC18791222	PRUPE_1G476200	ATGGGGTTTCATCTCCCACTCATCTTTGCTATTCTCAGTCTAGCAGCGGTTGCACTGGCAAACAATGCTGCTCAACCAGCACCTCAACTTTACTGGAACTCCGTCCTGCCAAACACACAGATGCCAAGATCTATCAGTGAACTTCTGCATCCTGACTCCACAAATGAAGAAAAGAGCAAACCTGAAATTTTCCCATTGCAGGGCAATAGAGTTTACACTCAAAGCCATTATAAAAAACGTCCTCCTCCTCCATCTGACGAGGGCAAACCTGAAACTTTCCCATTGGGCAATAGCCATTACACTCAAACCCGTTATAAAAAACGTCCTCCTCCTCCATCTGACGAGGGCAAACCTGAAAATTTCCCATTGGGCAATAGCCATTACACTCAAACCCGTTAT…	MGFHLPLIFAILSLAAVALANNAAQPAPQLYWNSVLPNTQMPRSISELLHPDSTNEEKSKPEIFPLQGNRVYTQSHYKKRPPPPSDEGKPETFPLGNSHYTQTRYKKRPPPPSDEGKPENFPLGNSHYTQTRYKKRPPPPSDEGKPENFPLANSFYTQTRYKKRPPPPSDEGKPENFPLANSFYTQSHYKKRPPPPSDEGKPENFPLARSPPSDSQLKHYKDLAIFFFEKDMRPGTTMKFQFPRNSNTATFLPRESAQSIPFSSKKLPEIFNHFSVKPTSEEAKTIKQTIEECEAPGLKGEEKYCATSLESMVDFSTSKLGTRNVEAISTEVLEEGATKYMHNYTTMPGLKKLEGDKVVVCHKENYPYAVFLCHAIKQTEAYVLSLKADDGMKVKAVTI…	9390.73	AT5G25610.1	3e-70	RD22, ATRD22	BURP domain-containing protein		g2202236980S415589-PHIS2-LDOX-2-4_T7.seq	BURP domain protein RD22
LOC18791411	PRUPE_1G465600	ATGGGGTTTCATCTCCCACTCATCTTTGCTATTCTCAGTCTAGCAGCGGTGGCACTGGCAAACCATGCTGCTCAACCAGCAGCTCAACTTTACTGGAACTCCGTCCTGCCAAACACACAGATGCCAAGAACTATCAGTGAACTTCTGCATCCTGACTCCACAAATGAAGAAAAGAGCACAAATATCATGAATGCTGTTGGGAATGGAAAGCCAACGGACCACAACGGCAAACCTAAAATGAAGGCATTGTTTAGCGGATACACAATTCAAGTACAGTATGCAGGAGTTCCTAATTCTGACAATCAACTCCAATATTATAAAAACATGACTATTTTCTTCTTGGGGAAGGACATGCGCCTTGGCGCAACAATGAACTTCCAATTCACTAGAAATTCAAAC…	MGFHLPLIFAILSLAAVALANHAAQPAAQLYWNSVLPNTQMPRTISELLHPDSTNEEKSTNIMNAVGNGKPTDHNGKPKMKALFSGYTIQVQYAGVPNSDNQLQYYKNMTIFFLGKDMRLGATMNFQFTRNSNTATFLPRESAQSIPFSSNKLSEIFNHFSVKPTSVEAKTIKKTIEECEAPGIKGEERYCATSLESMVDFSTSKLRTRNVQAISTEVLEKGATMSMHKYTTMPGLKKLAGDKVVVCHKENYPYAVFFCHAIKQTAAYVLSLKGDDGVKVKAVTICHLDTSEWNPKHLAFQILKVKPGTIPICHFLSTDAIAWVPNHKSA	631.442	AT5G25610.1	5e-78	RD22, ATRD22	BURP domain-containing protein		g2202236980S415589-PHIS2-LDOX-2-4_T7.seq	BURP domain protein RD22
LOC18792034	PRUPE_1G280900	ATGTCGGACGAGGAGCACCACTTCGAATCCAAGGCTGACGCCGGAGCTTCCAAGACCTATCCTCAGCAAGCTGGCACCATCCGCAAGAACGGTTACATTGTCATCAAGGGCAGGCCCTGCAAGGTTGTGGAGGTTTCCACTTCCAAGACTGGAAAGCACGGACATGCCAAGTGTCACTTTGTTGGTATTGATATCTTCACTGCCAAGAAGCTTGAGGATATTGTTCCCTCGTCCCACAATTGTGATGTTCCCCATGTCAACCGTACTGACTACCAGCTGATTGATATCTCTGAGGATGGATTTGTGAGTCTGCTGACTGAGAATGGTAACACCAAGGATGACCTGAGGCTTCCAACCGATGACAGTCTGCTTACGCAGATCAAGGATGGCTTTGGTGAG…	MSDEEHHFESKADAGASKTYPQQAGTIRKNGYIVIKGRPCKVVEVSTSKTGKHGHAKCHFVGIDIFTAKKLEDIVPSSHNCDVPHVNRTDYQLIDISEDGFVSLLTENGNTKDDLRLPTDDSLLTQIKDGFGEGKDLVVSVMSAMGEEQICALKDIGPK	3082.29	AT1G13950.1	3e-102	EIF-5A, ELF5A-1, ATELF5A-1, EIF5A	eukaryotic elongation factor 5A-1		g2202236986S415589-PHIS2-LDOX-2-10_T7.seq	eukaryotic translation initiation factor 5A-2
LOC18792445	PRUPE_1G225700	ATGGCTTCCGCTTGGGCTTCTTCTTCTGCCATTGCAGCCGTTGCCATATCTTCTCCCAGCTCCCAGAAGGCTGGGTCTACTTTGGCAGCAACAAAGGCTTCTTTCTTTGGTGGGAGGAAGCTCAGAGTGAGGAACTTGACAGCGTCCTCTGGATCATCAACATCTTTCACAGTACGTGCTGCTGCAGCTGACCCTGATAGACCCTTGTGGTTCCCAGGCAGCACCCCTCCTCCATGGCTCGATGGAAGCCTCCCAGGAGACTTTGGCTTTGATCCCCTTGGTCTTTCATCTGACCCTGACAGCTTGAGATGGAACCAGCAAGCAGAACTTGTACACTGCAGATGGGCTATGTTAGGTGCAGCTGGCATCTTCATCCCAGAATTCTTGACCAAAATTGGC…	MASAWASSSAIAAVAISSPSSQKAGSTLAATKASFFGGRKLRVRNLTASSGSSTSFTVRAAAADPDRPLWFPGSTPPPWLDGSLPGDFGFDPLGLSSDPDSLRWNQQAELVHCRWAMLGAAGIFIPEFLTKIGILNTPSWYTAGEQEYFTDTTTLFVVELVLIGWAEGRRWADILKPGSVNTDPIFPNNKLTGTDVGYPGGLWFDPLGWGSGSPEKVKELRTKEIKNGRLAMLAVMGAWFQHIYTGTGPIDNLFAHLADPGHATIFAAFTPK	526.536	AT3G61470.1	7e-152	LHCA2	photosystem I light harvesting complex gene 2		g2202237064S415589-PHIS2-LDOX-2-88_T7.seq	chlorophyll a-b binding protein, chloroplastic
LOC18792611	PRUPE_1G557800	ATGGCAGCAACAACTGGTGCAGTGCTTAATGGGTTGAACTCACCCTTCTTGTGCGGAGGCAAGAGAAGCCAGGCCTTGTTGTCTGCTGGTTTTGGAACCACCAGAGTTGGAGGCGGCCCTGCTGCTCCTAAGAGGTTCATTGTGGTTGCTGCTGCTGCACCTAAGAAGTCTTGGATCCCAGCCGTTAAAGCCAGCAACAACTTCATCGATCCTGAGTGGCTCGATGGCTCGCTTCCAGGTGACTACGGTTTCGACCCTCTAGGACTAGGCAAGGACCCAGGGTTCCTAAAGTGGTACAGAGAGGCTGAGCTCATCCACGGACGGTGGGCAATGGCCGCCGTGGTCGGCATCTTTGTAGGCCAGGCCTGGAGTGGTGTCCCATGGTTCGAAGCCGGGGCA…	MAATTGAVLNGLNSPFLCGGKRSQALLSAGFGTTRVGGGPAAPKRFIVVAAAAPKKSWIPAVKASNNFIDPEWLDGSLPGDYGFDPLGLGKDPGFLKWYREAELIHGRWAMAAVVGIFVGQAWSGVPWFEAGADPSAIAPFSFGSLLGTQLLLMGWVESKRWVDFYNPESQSIEWATPWSKTSENFANATGEQGYPGGKFFDPLGFAGSIKNGVYIPDSEKLERLKLAEIKHARLAMVAMLIFYFEAGQGKTPLGALGL	1153.1	AT1G15820.1	6e-145	LHCB6, CP24	light harvesting complex photosystem II subunit 6		g2202237064S415589-PHIS2-LDOX-2-88_T7.seq	chlorophyll a-b binding protein CP24 10A, chloroplastic
LOC18792990	PRUPE_1G013900	ATGGCGGCCCTTCACTTCACTCCATCTCCTTCTTTCACTCTCCCAAAACAACGACACGCAACCAGACTCTCTGCTTCCTTTCAGCTCAATATCCGGCCCCGCCACCGGTCACGGCGATCCTGCACCGTCGGATCCTACAAGGTGGTGGTAGAGCACGAGGGTTTGTCTACTGAGCTTGAGGTGGAGGCTGATGAGACCATTCTAGAAAAGGCATTGGAGTCTGGGCTTTCTGTGCCGCATGATTGCAAGCTTGGGGTGTGCATGACTTGCCCTGCACGGCTTCTGAGTGGGAAGGTTGATCAGAGTGAAGGTATGCTGAGTGATGATGTGGTGGAAGGTGGGTATACCTTGCTGTGTGTGTCGTACCCACAGTCGGATTGTCACATTAGGACCATTCCA…	MAALHFTPSPSFTLPKQRHATRLSASFQLNIRPRHRSRRSCTVGSYKVVVEHEGLSTELEVEADETILEKALESGLSVPHDCKLGVCMTCPARLLSGKVDQSEGMLSDDVVEGGYTLLCVSYPQSDCHIRTIPEDELLSLQLATAND	365.135	AT4G14890.1	2e-56	FdC2	2Fe-2S ferredoxin-like superfamily protein		g2202237000S415589-PHIS2-LDOX-2-24_T7.seq	ferredoxin
LOC18793668	PRUPE_1G475400	ATGCTGCTCAACCAGCACCTCAACTTTACTGGAACTCCGTCCTGCCAAACACACAGATGCCAAGATCTATCAGTGAACTTCTGCATCCTGACTCCACAAATGAAGAAAAGAGCACAAATGACGTTGGCAAACCTGAAACTTTCCCATTGGGCAATAAACATTACTCCAGTCAAAAACATTATGGAAGAGGCAAACCTGAAACTTTCCCATTGGGCAATAAACATTACTCCAGTCAAAGACATTATGGAAGAGGCAAACCTGAAACTTTCCCATTGGGCAATAAACATTACTCCAGTCAAAGACATTATGGAAGAGGCAAACCTGAAACTTTCCCATTGGGCAATAAACATTACTCCAGTCAAAAACATTATGGAAGAGGCAAACCTGAAACTTTCCCAT…	MLLNQHLNFTGTPSCQTHRCQDLSVNFCILTPQMKKRAQMTLANLKLSHWAINITPVKNIMEEANLKLSHWAINITPVKDIMEEANLKLSHWAINITPVKDIMEEANLKLSHWAINITPVKNIMEEANLKLSHWAISITPVKKSMEEVLLHPTINHQFHRNSNTATFLPRESAQSIPFSSNKLPEIFNHFSVKPTSEEAKTIKQTIEECEAPDLKGEEIYCATSLESMVDFSTSKLGTRNVEAISTEVLEKGATMSIQNYTTMPGLKKLAGDKVVVCHKQNYPYAVFFCHAIKHTAAYALSLKGDDGEKVKAVTICHLDTSEWDPEHMSFKIVNVKPGTIPICHFISTDAIAWVPNHKSA	385.658	AT5G25610.1	6e-68	RD22, ATRD22	BURP domain-containing protein		g2202236980S415589-PHIS2-LDOX-2-4_T7.seq	BURP domain-containing protein 5
LOC18793691	PRUPE_1G251500	ATGGGGCTTACATTCACGAAGCTTTTCAGCCGGCTTTTTGCCAAGAAAGAGATGCGAATTCTGATGGTTGGTCTTGATGCTGCTGGTAAGACCACCATCCTCTACAAGCTCAAGCTCGGTGAGATCGTCACAACAATTCCCACCATTGGGTTTAATGTGGAGACCGTGGAGTACAAGAACATCAGCTTCACAGTCTGGGATGTCGGGGGTCAGGACAAGATCCGACCTTTGTGGAGGCATTACTTCCAGAACACACAGGGTCTTATCTTTGTTGTGGACAGCAATGACAGAGACCGTGTTGTTGAGGCAAGGGATGAATTGCATAGGATGTTGAATGAGGATGAGCTGCGAGATGCCGTGTTGCTTGTATTTGCTAACAAACAAGATCTTCCCAATGCA…	MGLTFTKLFSRLFAKKEMRILMVGLDAAGKTTILYKLKLGEIVTTIPTIGFNVETVEYKNISFTVWDVGGQDKIRPLWRHYFQNTQGLIFVVDSNDRDRVVEARDELHRMLNEDELRDAVLLVFANKQDLPNAMNAAEITDKLGLHSLRQRHWYIQSTCATSGEGLYEGLDWLSNNIANKA	744.862	AT1G10630.1	7e-132	ATARFA1F, ARFA1F	ADP-ribosylation factor A1F		g2202237049S415589-PHIS2-LDOX-2-73_T7.seq	ADP-ribosylation factor 2
LOC18793702	PRUPE_1G581900	ATGAGCAACGAATACGATTATCTGTTCAAGCTTTTGCTAATTGGGGACTCGTCCGTTGGAAAATCTTGCTTGCTTCTCAGATTTTCTGATGACTCCTATGTAGACAGCTACATAAGCACCATTGGAGTTGATTTTAAAATCAGAACAGTGGAGCTGGATGGGAAGACAGTCAAGCTGCAGATTTGGGATACTGCTGGACAGGAGCGATTCAGGACTATAACAAGCAGTTACTACCGAGGAGCACACGGGATAATTATTGTCTATGATGTTACTGAGATGGAGAGCTTCAACAATGTCAAGCAGTGGCTGAATGAGATTGACAGATATGCAAGTGACAGTGTGTGCAAACTTCTAGTCGGAAATAAGTGTGATTTAGTTGAGAACAAGGTTGTTGACACA…	MSNEYDYLFKLLLIGDSSVGKSCLLLRFSDDSYVDSYISTIGVDFKIRTVELDGKTVKLQIWDTAGQERFRTITSSYYRGAHGIIIVYDVTEMESFNNVKQWLNEIDRYASDSVCKLLVGNKCDLVENKVVDTQTAKAFADELGIPFLETSAKDSINVEQAFLTMANEIKKKMGSQPTANKSSGTVEMKGQPIQQNGNCCG	390.346	AT3G11730.1	2e-127	ATFP8, ATRABD1, RABD1	Ras-related small GTP-binding family protein		g2202237049S415589-PHIS2-LDOX-2-73_T7.seq	ras-related protein RABD1
LOC18793978	PRUPE_1G276700	ATGAAAATGGCTCTTGCTTATGGGTTTTGTTTGGTGGGTCTTCTTGCAATGGTCTCCTGTGCGCATGCTTATGGTGGAGGTGGATGGGTTAACGCTCGTGCCACTTTCTATGGAGGCGGTGATGCTTCCGGGACAATGGGTGGTGCTTGTGGGTATGGAAACCTCTACAGTCAGGGGTACGGGACAAATACTGCAGCACTGAGCACTGCTCTGTTCAACAATGGCTTGGGCTGTGGTTCTTGCTATGAGATTAGGTGTGTAAGTGACCCCAAATGGTGCTTGCCTGGCGCCATTGTGGTCACAGCCACCAATTTCTGCCCACCAAACAATGCCCTTCCTAACAATGCTGGGGGCTGGTGCAATCCTCCTCAGCACCACTTTGACCTCTCTCAGCCTGTC…	MKMALAYGFCLVGLLAMVSCAHAYGGGGWVNARATFYGGGDASGTMGGACGYGNLYSQGYGTNTAALSTALFNNGLGCGSCYEIRCVSDPKWCLPGAIVVTATNFCPPNNALPNNAGGWCNPPQHHFDLSQPVFQHIAQYKAGVVPVAYRRVPCRRRGGIRFTINGHSYFNLVLITNVGGAGDVHSVSVKGSRTGWQAMSRNWGQNWQSNSYLNGQSLSFKVTTSDGRTVVSYNAAPAGWSFGQTYSGAQFR	1368.27	AT1G69530.2	1e-154	ATEXPA1, EXP1, AT-EXP1, ATEXP1, ATHEXP ALPHA 1.2, EXPA1	expansin A1		g2202237048S415589-PHIS2-LDOX-2-72_T7.seq	expansin-A1
LOC109946234	PRUPE_3G078600	ATGTGGCGGCGACTGCTCTCTTCATCTCAGCTCAAGACCCTAACCCTAGCCGCCAACAGCGCCTCGGCTCCATGCCGATCGGCCACCGGACCTGCCCGCTGTCTCCTCCACAAGCCCCTTCCTCTCCTTCCTTGCTACTTCAGCACCACCTCCGATGCTGCAAAACCTGGTGTGAAGAAGGTTGAGGAGGTAATGCCCATTGCCACTGGCCACGAGCGAGAGGAGCTTGAAGCTGAACTTGAGGGAAGGGATGTTCTGGAAATCAACCATCCTGTTGGTCCTTTTGGCACAAAGGAAGCACCTGCAGTTATCAAGTCCTATTACGACAAGAGAATAGTTGGATGCCCTGGTGGTGAAGGCGAGGATGAGCATGATGTTGTGTGGTTTTGGCTGACTAAA…	MWRRLLSSSQLKTLTLAANSASAPCRSATGPARCLLHKPLPLLPCYFSTTSDAAKPGVKKVEEVMPIATGHEREELEAELEGRDVLEINHPVGPFGTKEAPAVIKSYYDKRIVGCPGGEGEDEHDVVWFWLTKDEPHECPVCSQYFVLEVVGPGGSPDHSDDHDHH	380.396	AT1G80230.1	1e-55		Rubredoxin-like superfamily protein			putative cytochrome c oxidase subunit 5b-like
LOC109946240	PRUPE_1G126700	ATGGAGTCTGATAATTCGTGGAGCAGTCTCTTCTCGAGCTCTTCGTCGAGGCGGTACCAATCTCGATCCGGTCACTTTTCCCAAACTACCCCAGATCTGTTTGCGCACGACGAAACTGATGGAGACGATGAGTTAAAGGCCGAGTTTTTGTGCCCTTTTTGCGCCGAGGATTTCGATGTTGTTGGGCTTTGTTGCCACATCGATGAGGAACATCCGGTGGAGGCTAAGAACGGGGTCTGTCCAGTTTGTTCCAAAAGGGTGGGAGCAAACCTTGTGAGCCATATTACCACGCAACATGGGAGTTTATTAAAGGTTCAGCGCAAGAGGAAATTTCGCAGGGGATCCAATTCAACATTTTCTTTATTAAGGAAAGAGCTTCGAGAAGGAAGTTTACAAGCC…	MESDNSWSSLFSSSSSRRYQSRSGHFSQTTPDLFAHDETDGDDELKAEFLCPFCAEDFDVVGLCCHIDEEHPVEAKNGVCPVCSKRVGANLVSHITTQHGSLLKVQRKRKFRRGSNSTFSLLRKELREGSLQALLGGSSFLVSSNTEADPLLSSFIYNPPTVDEDVSAQPRPSVETSFVKESTKEEFSERTVQQPPLSHKDQEEKGRKCEFVRGLLMSTILDDL	201.296	AT5G49230.1	1e-68	HRB1	Drought-responsive family protein			protein DEHYDRATION-INDUCED 19 homolog 4-like
LOC109946242	PRUPE_6G082700	ATGGCGCCTAAAGCCGAGAAGAAGCCCGCCGAGAAAAAGCCAGCTGAGGAGAAGAAGTCCACCGTGGCTGAGAAAGCCCCCGCGGAGAAGAAGCCCAAGGCCGGCAAGAAGCTTCCGAAGGAAGCCGGAGCCGCCGCTGGAGATAAGAAGAAGAAGAGATCGAAGAAGAGCGTCGAGACCTACAAGATCTACATCTTCAAGGTGTTGAAGCAGGTCCACCCTGATATCGGAATCTCCAGCAAGGCCATGGGCATCATGAACAGCTTCATCAACGACATCTTCGAGAAGCTCGCTCAGGAGTCTTCGAAGCTTGCGAGGTACAACAAGAAGCCGACGATTACTTCTCGGGAGATTCAGACTGCTGTGAGGCTTGTGCTTCCCGGTGAGCTCGCCAAGCAC…	MAPKAEKKPAEKKPAEEKKSTVAEKAPAEKKPKAGKKLPKEAGAAAGDKKKKRSKKSVETYKIYIFKVLKQVHPDIGISSKAMGIMNSFINDIFEKLAQESSKLARYNKKPTITSREIQTAVRLVLPGELAKHAVSEGTKAVTKFTSS	207.132	AT3G45980.1	8e-84	H2B, HTB9	Histone superfamily protein			probable histone H2B.1
LOC109946244	PRUPE_3G178200	ATGGTGGTAAAGGTGTATGGCGCTGCCTATGCTTCCCCGAAGCGTGTGCTGGTGTGTCTTGTTGAGAAAGAGGTCGACTTTGAGACCATTCCCATTGATCTCTTCAAGGGAGAGCACAAACACCCTGAATTTCTCAAATTGCAGCCCTTTGGAACAGTTCCTCTCATTCAAGATGGGGATTATACTTTATATGAATCACGCGCAATCATAAGGTACTATGCCGAAAAATACAAGTCTCAAGGGACTGCTTTGCTAGGGAAGACAATTGAGGAAAGAGGGCTAGTTGAGCAATGGCTAGAGGTTGAAGCACACAACTTCCACCCACCACTCAACAACTTAGTCCTTCACATTTTGTTTGCCTCAGCATTGGGTTTTCCTTCAGATCCCAAGGTCATTCAA…	MVVKVYGAAYASPKRVLVCLVEKEVDFETIPIDLFKGEHKHPEFLKLQPFGTVPLIQDGDYTLYESRAIIRYYAEKYKSQGTALLGKTIEERGLVEQWLEVEAHNFHPPLNNLVLHILFASALGFPSDPKVIQESEEKLGKVLDIYEERLSKSKYLAGDFFSLADLSHLPFTQYMVTLLGKEYLIKDRKHVSAWWNDISNRPSWKKVLEFGTPF	404.745	AT2G30860.1	4e-109	ATGSTF9, GLUTTR, ATGSTF7, GSTF9	glutathione S-transferase PHI 9			glutathione S-transferase F9-like
LOC109946321	PRUPE_8G064800	ATGCGTCCTCCAAGAGGCGGCGGTGGGTTTAGGGGCAGCCGCGGTGGTGGCGGCGGCTTTAGAGGCGGCCGCGGAGGAGGTGGCCGTGGTGGAGGTGGCCGTGGCTACCGCGATGAGGGTCCTCCTTCTGAAGTCGTAGAGGTTTCGACATTTCTTCATGCGTGTGAAGGTGACGCAGTCACAAAGCTCACAAATGCGAAGAAGGTGCCCTATTTTAATGCCCCTATCTATCTGCAGAACATGACTCAGATAGGGAAGGTTGATGAAATATTTGGTCCAATCAATGAATCTTTATTCTCAATTAAAGTGATGGAAGGCATTGTGGCAACTTCATATTCACAGGGCGATAAGTTCTATATTGACCCAGCAAAGCTTCTTCCTCTTGAAAGATTTCTTCCA…	MRPPRGGGGFRGSRGGGGGFRGGRGGGGRGGGGRGYRDEGPPSEVVEVSTFLHACEGDAVTKLTNAKKVPYFNAPIYLQNMTQIGKVDEIFGPINESLFSIKVMEGIVATSYSQGDKFYIDPAKLLPLERFLPQPKGQKPAFSRGGGRGGGRGGAFRGGGRGGGAFRGRGAPRGGRGPPRGGSRGGGFRGRGRF	252.386	AT3G03920.1	9e-60		H/ACA ribonucleoprotein complex, subunit Gar1/Naf1 protein			putative H/ACA ribonucleoprotein complex subunit 1-like protein 1
LOC109946432	PRUPE_1G320700	ATGGCTTCGCGAAGGCTCTTATCTTCTCTCGCCCGGTCCTCCGTACGCCGAGCACCTTCTAAATCTCCGATCTCAAGCCCTAACCCTAGAATCGCATCCCCATCGCCATCGTCTCGATGCGCTTCTCCTTACGGCTACATCCTCAACCGCGTGGCCCATTACGCCACCGCCGCGGCTGCCGAGACAACGACGGCGTCATCATCCCCTAAAAGTAAGGACGCCGGGAAGGGAAAAATTACCGACGAATTCACCGGGAAGGGCGCGATCGGGCAGGTGTGCCAGGTGATCGGAGCCGTTGTCGATGTGAGGTTCGAGGAGGGCTTGCCCCCGATCTTGACTGCACTTGAAGTGCTGGACAACTCGATCCGGTTGGTGCTTGAGGTGGCTCAGCACTTGGGT…	MASRRLLSSLARSSVRRAPSKSPISSPNPRIASPSPSSRCASPYGYILNRVAHYATAAAAETTTASSSPKSKDAGKGKITDEFTGKGAIGQVCQVIGAVVDVRFEEGLPPILTALEVLDNSIRLVLEVAQHLGENMVRTIAMDGTEGLVRGQRVLNTGSPITVPVGRATLGRIMNVIGEPIDERGDMKTDHFLPIHREAPAFVEQATEQQILVTGIKVVDLLAPYQRGGKIGLFGGAGVGKTVLIMELINNVAKAHGGFSVFAGVGERTREGNDLYREMIESGVIKLGEKQADSKCALVYGQMNEPPGARARVGLTGLTVAEHFRDAEGQDVLLFIDNIFRFTQANSEVSALLGRIPSAVGYQPTLATDLGGLQERITTTKKGSITSVQAIYVPADDLT…	592.455	AT5G08680.1	0		ATP synthase alpha/beta family protein			ATP synthase subunit beta, mitochondrial
LOC109946462	PRUPE_1G324100	ATGGCATTCTCAAGTTGCAAGCTGGTGGGCGGCGGTTCGCTTCCTTCGGCAGTCGGAGAGAACCAGTTCCCCTGGAAGCGCTCGGTGACGACAACCCCGAAGAGAGCTCTTCCTCTTCAGGTGAGAAGTGAGGGAAAACGCAAAATAGAAGCTCCAAAAGCCTTTGGCGTTTCACGAAGAGATTTGATGTTATGTTTGCCTGCTGGGACACTGGCAGCAGCCACTCTTTTTCCTATAAAACCTGCGGAAGCGCGCATTGTCAAGCCCGAGATCAGGAGGAAAATTCAAGAGAAGTTTGAGAAGATCAGGGAACAGTTTGGGTTGTCAAAGCCAAAGACCAATGATGGGAAAGAGCCATACCCATCACCACCATCGTCGGAGGAGAAAAAGCCTCAAACT…	MAFSSCKLVGGGSLPSAVGENQFPWKRSVTTTPKRALPLQVRSEGKRKIEAPKAFGVSRRDLMLCLPAGTLAAATLFPIKPAEARIVKPEIRRKIQEKFEKIREQFGLSKPKTNDGKEPYPSPPSSEEKKPQTLPPAPPQNAQGSLLVPPVEAILP	744.814							uncharacterized
LOC109946463	PRUPE_1G324400	ATGCCGATCAAAATGCGTTGCTTTAAACCTCCGGCCCTGGCTATGATTGCCATGTTCCTTTTGATTGCCTCCGTTGCAGGTCCAGTCTACGCTGACGAAACCCCACCCGCGCCTGGCGAGGAAAAGTGCGGCTCGTGCTCTCAAAGCCCCCCTCCGCCATCACCGCCACCACCATCTCCGCCGCCACCGTCATTGCCGCCGCCTTCTCCCAAAAAACCACCGCCGTCCACTCCGTACTGCCCTCCGCCGCCATCGACGCCATCGACGCCATCGACGCCATCAACGCCATCAACGCCATCAACACCGTCCACGCCGTTGATATACATCACCGGTCCACCGGGGGACTTGTACCCTGTTGACCATAGTTTCAATGGTGCTAGCCGGAGTTTGGTCACGGGG…	MPIKMRCFKPPALAMIAMFLLIASVAGPVYADETPPAPGEEKCGSCSQSPPPPSPPPPSPPPPSLPPPSPKKPPPSTPYCPPPPSTPSTPSTPSTPSTPSTPSTPLIYITGPPGDLYPVDHSFNGASRSLVTGLPVLVGCGLLGLLLAFW	658.23							WAS/WASL-interacting protein family member 3-like
LOC109946590	PRUPE_1G392400	ATGGCGATGGGTTTCTTCTGCCTTGCTCTGTTCCTCATCTTCGGCCTCGATCTCGATACAGGCTACGCTGCTTCCGCTTCTACCTCCGAGGGCGTCGAGGTGACGTACGGGACTGTGCTGAAGCTGATGCACGAGAAGACCAAGTTTCGCCTGCATTCCCACGACGTGCCGTATGGTTCCGGTAGTGGTCAGCAGTCTGTCACTGGTTTTCCCAACGTTGACGATGCAAATAGCTACTGGATTGTTAGACCTGAGCTCGAAACAGCTGCCAAGCAAGGTGATAGCATTCCAAGTGGGACAATTATCAGGTTGCAGCACATGAAGACTAGGAAATGGCTGCACAGCCATTTGCACGCCTCCCCCATAACTGGCAACCAAGAGGTGAGCTGCTTTGGGGGA…	MAMGFFCLALFLIFGLDLDTGYAASASTSEGVEVTYGTVLKLMHEKTKFRLHSHDVPYGSGSGQQSVTGFPNVDDANSYWIVRPELETAAKQGDSIPSGTIIRLQHMKTRKWLHSHLHASPITGNQEVSCFGGESESDTGDHWRVMIEGSGKTWKQDQRVRIQHVDTGVYLHSHDKKYTRIAGGQQEVCAVREKRADNVWLAAEGVYLPVGETK	290.941	AT2G25110.1	8e-125	SDF2, ATSDL, AtSDF2	stromal cell-derived factor 2-like protein precursor			stromal cell-derived factor 2-like protein
LOC109946603	PRUPE_1G406000	ATGGCTTCTGCTTCAATGGCTATCCCACTGATGTCTGCCACCCAAAACGGACTAAACCAGTCTAACTCTGCATCACTGTTCAAATCAGTCCCAGTCAGGCCATCAAAGAAGGCTGCTTTTGTGAAGCCAAAGTCCAAAGGCATGCTTAAGGTGGAGGCATCTTTCAAAGAAAAGGCAGTGACAGGCTTAACAGCAGCTGCATTAACAGCCTCCATGGTGATACCTGAGGTGGCTGAGGCTGCAGGCTCTGGCCTCACACCCTCTCTCAACAACTTTTTGCTTAGCATTGCTGCTGGTGGAGTTGTGCTTACAGCCATTATAGGAGCTGTTGTTGGGGTCTCTAACTTCGACCCAGTTAAGAGAACCTGA	MASASMAIPLMSATQNGLNQSNSASLFKSVPVRPSKKAAFVKPKSKGMLKVEASFKEKAVTGLTAAALTASMVIPEVAEAAGSGLTPSLNNFLLSIAAGGVVLTAIIGAVVGVSNFDPVKRT	336.004	AT2G06520.1	2e-31	PSBX	photosystem II subunit X			uncharacterized
LOC109946706	PRUPE_1G130100	ATGGTGTCGCTCAAGCTCCAGAAGCGGCTTTCCGCTAGCGTCCTCAAGTGTGGCCGAGGGAAGGTCTGGCTCGACCCCAATGAGGTCAACGAAATCTCCATGGCCAACTCCAGGCAAAACATTAGGAAACTGGTAAAGGATGGTTTCATCATCAGGAAACCAACAAAGATCCACTCGCGTTCTCGTGCTCGGAGAATGAAGGAGGCTAAGAGGAAGGGTCGTCACTCTGGACATGGTAAGCGTAAGGGTACCAGGGAGGCAAGGCTGCCCACCAAAATCCTCTGGATGAGGAGAATGCGAGTTTTGAGGCGCTTACTCCGTAAGTACCGTGAGTCCAAGAAAATTGACAAGCACATGTACCATGACATGTACATGAAGGTGAAAGGTAATGTCTTTAAG…	MVSLKLQKRLSASVLKCGRGKVWLDPNEVNEISMANSRQNIRKLVKDGFIIRKPTKIHSRSRARRMKEAKRKGRHSGHGKRKGTREARLPTKILWMRRMRVLRRLLRKYRESKKIDKHMYHDMYMKVKGNVFKNKRVLMESIHKSKAEKAREKTLSDQFEAKRAKNKASRERKLARREERLAQGPGERAAPTPAPQQAEGGAKKAKK	361.213	AT3G16780.1	3e-125		Ribosomal protein L19e family protein			60S ribosomal protein L19-2
LOC109946796	PRUPE_1G301700	ATGGCTTCAATTGTCTTGGCTTTCGTTCTAAGTTGTCTTAGCTTTCTACTAGTCCTTACCAATGCACAAACACCGGCAGCTGCACCCTCTACTCTGCCGGCTGCAACGCCCCCACCTACCACCACACCAGCTGCCCCGGCTACTTTGCCAACAACAACTCCACCAACTTCTCCTGCATCACCAACTGCAGCAACACAACCACCTGTAAACGCAGCAGCAACCCCACCCACAACCACACCTACGTCACCATCCCCTAAGGTTGCACCAGCCACAAGCCCAACAGTCCCACCCCCACTACCACAAAGTCCACCTGCCTCAACTCCATCACAGCCACCAGCACTTCCGCCACCATCACCCGTTTCACCACCACCACTGCCACCTCCTGTACCAGCACCAATT…	MASIVLAFVLSCLSFLLVLTNAQTPAAAPSTLPAATPPPTTTPAAPATLPTTTPPTSPASPTAATQPPVNAAATPPTTTPTSPSPKVAPATSPTVPPPLPQSPPASTPSQPPALPPPSPVSPPPLPPPVPAPIQAPPAPAPVKETPAPAPAKVAPVPSPSKPPPAPAPAPVLVPPAAAPVLVPSTAPAPPKHRRHRHKHRRHHHAPAPAPTVLSPPAPPTTVTDTEETTPAPSPSLNLNGGNALHQKGGISGMWVTIGLAIAILLAMRS	204.836							lysine-rich arabinogalactan protein 19
LOC109946805	PRUPE_1G068000	ATGGCGTCAAGCAAGAGTTTGCTATCAGCAACAGCCGCAGTTATATTAGCAACGTCTCTCTTCTGGACCTTTACTTCGTCTTCATCATCGCCTTCTTCGGCCGACTCCATCGCCTTCATCAAGAAGACCATCGATTCCAACAAGATCGCCATCTTCTCCAAGTCCTATTGCCCGTACTGTAAAAGGGCAAAATCTGTTTTTAAAGAGTTGAACCAAGTACCCTATGTAGTTGAGCTTGATGAGAGAGCTGACGGTCGAGATATCCAAGATGCTTTAGGTGAGCTTGTTGGGAGGCGTACTGTACCACAGGTGTGGGTGAAGGGAAAGTACATTGGGGGCTCAGATGATACTGTTGAAGCATATGAAAGTGGAGAACTGGCAAAGCTTCTGGGCATTGAG…	MASSKSLLSATAAVILATSLFWTFTSSSSSPSSADSIAFIKKTIDSNKIAIFSKSYCPYCKRAKSVFKELNQVPYVVELDERADGRDIQDALGELVGRRTVPQVWVKGKYIGGSDDTVEAYESGELAKLLGIEVQHREDL	467.363	AT5G20500.1	5e-56		Glutaredoxin family protein			glutaredoxin-C4
LOC109946853	PRUPE_1G414100	ATGGCTCTGCTGACCCGAGCCTCACGCATCCCTCTCCAGCTCTCGGCCCAGCGGGCCCTCTCTCTCCACACGACCGTCCCCTCGCTGTCGTCTTCCTCCCCCTCCGGCTCAACTCCGACCACATATGCCCGCCCTCCTCCCCCCTCGGCCTCGCTGCCTCCGGCTGGCCTCTCCAAGGCCGCCGAGTTCGTGATCTCGAAGGTCGACGATCTCATGAACTGGGCCCGCCGTGGGTCCATCTGGCCCATGACCTTCGGCCTCGCCTGCTGCGCCGTCGAGATGATGCACACCGGAGCCGCCCGATATGATTTGGACCGATTCGGCATCATTTTCCGGCCCAGCCCTCGCCAGTCTGATTGCATGATCGTCGCCGGCACTCTCACCAACAAGATGGCCCCC…	MALLTRASRIPLQLSAQRALSLHTTVPSLSSSSPSGSTPTTYARPPPPSASLPPAGLSKAAEFVISKVDDLMNWARRGSIWPMTFGLACCAVEMMHTGAARYDLDRFGIIFRPSPRQSDCMIVAGTLTNKMAPALRKVYDQMPEPRWVISMGSCANGGGYYHYSYSVVRGCDRIVPVDIYVPGCPPTAEALLYGLLQLQKKINRRKDFLLWWTK	472.768	AT5G11770.1	2e-126		NADH-ubiquinone oxidoreductase 20 kDa subunit, mitochondrial			NADH dehydrogenase [ubiquinone] iron-sulfur protein 7, mitochondrial
LOC109946881	PRUPE_1G098900	ATGGGTAGTTTTAGTTTCAGTTTGAAGTCTTTAACCCTTTTTGCTTTGCTTGTTTCAAGTGTTGTCCTGTCCGAAAGCCGGGTGGCAAGAAAGGACCTGGGGATAGACCTTGGTGGGATTGGGGTTGGAGTGGGAGCTGGATTAGGGATTGGGCTCGGTGGGAGTGGAGCTGGCTCAGGTGCTGGATCGGGGTCAGGTTCGGGATCCGGATCTAGCTCTAGCTCCAGCTCTAGCTCAAGCTCATCTTCTTCGTCCAGATCCAATGGGTCGGGCTCTTCCGAAGCAGGTTCGTCTGCTGGGTCTTATGCCGGGTCTAGGGCTGGGTCAGGCTCAGGAAACGGAGGGCGTGGATAA	MGSFSFSLKSLTLFALLVSSVVLSESRVARKDLGIDLGGIGVGVGAGLGIGLGGSGAGSGAGSGSGSGSGSSSSSSSSSSSSSSSRSNGSGSSEAGSSAGSYAGSRAGSGSGNGGRG	270.946							GPI-anchored CFEM domain protein A
LOC109946894	PRUPE_1G116800	ATGGAGGGAGGTGGAGAAGGAGAGGTAGAGAGGGTGGAGGACTCGAAGGACTTGCAGCAGCAGAGCAAAGCCTTCGATAAGCTCACTGACCGCGTCGAAGATCGCCAGCTCGACTCTACCCGCGTCCAGGAGGCCATGGCTTCCATTGCTGCCTCCTCCGAAGCCGATTGGAATGCTATGAGATTGAGGGAGAAGGAATTGGCTGCCGTGAAGATCAATGCAGCTGATGTTGACATAATTGCAAATGAACTAGAGTTGGACAAGAAGGTTGCTGAGAGGACCTTGCGGGAGCACAAAGGTGATGCCGTTGCTGCCATTCGACACTTGCTTCACTAG	MEGGGEGEVERVEDSKDLQQQSKAFDKLTDRVEDRQLDSTRVQEAMASIAASSEADWNAMRLREKELAAVKINAADVDIIANELELDKKVAERTLREHKGDAVAAIRHLLH	246.741	AT3G06610.1	3e-53		DNA-binding enhancer protein-related			huntingtin-interacting protein K
LOC109947017	PRUPE_2G031000	ATGCAGACCCGTCTTACTTTCCAAAGGGCCCTTCTGGGTCTCTGGTTGTGCTTGTTTGCTGTAAGCTTCTGCTACAGCAATGCAGAGACTATTGAGGAAGCTGGAGAACAAGCACTAGACAGAGCTTATTCAGAGCTGCAAACAGAGGCTGCAGAGCTGAATGAAGAAGGGAAGTTTGTCTTTAAGAAACACCCTCTACCTAAGATTCCCATTGTAAAGAAGCCATTTCCACCAAAGCCCTTCTTCAAGAAGCCACTTCCACCACCAGTTCCAATCTTCAAGAAGCCACTCCCTCCACCTGTTCCAGTCTTCAAGATTCCACCCTTCAAGAAGCCGGGTCATCCGCCGGTATCAGTTGTGGAAGGAAAACCATTTGTGAAGAAGCCATTTTTTCATCCC…	MQTRLTFQRALLGLWLCLFAVSFCYSNAETIEEAGEQALDRAYSELQTEAAELNEEGKFVFKKHPLPKIPIVKKPFPPKPFFKKPLPPPVPIFKKPLPPPVPVFKIPPFKKPGHPPVSVVEGKPFVKKPFFHPLPKFKKPSLPPVPIYKKPLPPPIPVYKKPFPHPIFKKPLPPPIPVYKKPFPHPIFKKPIPPPIPTFPPHPFLGKPLPPLVP	598.291							proline-rich protein 4-like
LOC109947793	PRUPE_1G390600	ATGCCGTCCCACAAGACCTTCATAATCAAGAAGAAGCTGGCGAAGAAGATGAGGCAGAACAGGCCCATCCCTCATTGGATCCGTTTGAGGACCGACAACACCATCAGGTACAACGCCAAGCGCAGGCACTGGCGCCGCACCAAGCTCGGTTTCTGA	MPSHKTFIIKKKLAKKMRQNRPIPHWIRLRTDNTIRYNAKRRHWRRTKLGF	590.35	AT4G31985.1	2e-29		Ribosomal protein L39 family protein			60S ribosomal protein L39-1
LOC109947795	PRUPE_3G206200	ATGCCGAAGAACAAGGGAAAGGGAGGAAAGAACAGGAAGAGAGGTAAGAATGAAGCCGATGATGAAAAGCGTGAACTTGTGTTTAAGGAAGATGGACAGGAGTATGCCCAAGTGCTTCGTATGCTGGGTAACGGTCGCTGTGAAGCCATGTGCATTGATGGGACGAAGCGACTTTGTCACATCCGTGGTAAGATGCACAAGAAGGTTTGGATTGCAGCCGGTGATATCATTCTTGTTGGTCTTCGTGATTATCAGGACGACAAAGCTGATGTGATCCTCAAGTACATGCCTGATGAGGCTAGGCTTCTGAAGGCATATGGAGAGCTTCCAGAGAACACACGTCTTAATGAGGGTATTGCCGGGGGTCTTGAAGACGAGGAAGAAGGCGGTGCTGATGAC…	MPKNKGKGGKNRKRGKNEADDEKRELVFKEDGQEYAQVLRMLGNGRCEAMCIDGTKRLCHIRGKMHKKVWIAAGDIILVGLRDYQDDKADVILKYMPDEARLLKAYGELPENTRLNEGIAGGLEDEEEGGADDYIEFEDEDIDKI	1214.38	AT2G04520.1	2e-89		Nucleic acid-binding, OB-fold-like protein			eukaryotic translation initiation factor 1A
LOC109948094	PRUPE_3G149600	ATGGTTTTAACTTTTACACGTTTTCTACCCACAAGTCACAGCTACCAGTCTCTAGAATCTTCTGCAGTTCATTTTTCGCAAGGCCTCCTCAGAGATATGCCTCACCATCATCCACCAGGACCCCCACCACCGCCAGACCCGTTTGCTCCTCCACCACCGGACCCCGCACCGCCAAGACCACCTCCACCAGGGCCTCCTGCTCCACCCCCGCCAGGGCATCCACCTCCGGGTGGACCTTTCGCTCCACCTCCTCCAGGACCACCTGGTCCTCCACCACCACGTGGTCCTCCACCACCACCTTAG	MVLTFTRFLPTSHSYQSLESSAVHFSQGLLRDMPHHHPPGPPPPPDPFAPPPPDPAPPRPPPPGPPAPPPPGHPPPGGPFAPPPPGPPGPPPPRGPPPPP	388.767							uncharacterized proline-rich protein-like
LOC109948158	PRUPE_3G012200	ATGGGGAATCCGAAAGGCGAGGTGCAGAGGAGGGTGTTGTTACTGTGCGGGGACTACATGGAAGATTACGAGGCAATGGTCCCATTTCAAGCACTGCAGGCATTTGGAGTCTCTGTTGATGCAGTTTCTCCTGTCAAGAAAGCTGGTGATATCTGCGCCACTGCCATAACCATTCAAGTAGAGTCCACTGACCAGGCTAATAAAGAATCTCGTGGTCACAATTTCACACTGAATGCAACATTTGATGACATCGAATTTGACAAATATGATGGTCTAGTTATACCAGGAGGACGATCTCCTGAACATCTTGCTATGAAGGCATCCGTTGTAGAATTGGCGAGAAAATTTTCTGACTCCAGAAAGCCAATTGCTGCTATTTGCCATGGGCTGTTGGTCTTA…	MGNPKGEVQRRVLLLCGDYMEDYEAMVPFQALQAFGVSVDAVSPVKKAGDICATAITIQVESTDQANKESRGHNFTLNATFDDIEFDKYDGLVIPGGRSPEHLAMKASVVELARKFSDSRKPIAAICHGLLVLAPAGAVKGRKCTAVSTMKPGLVAAGAHWVEPDTLSVCVADDNLTTGVTYYGNPEFIGLFLKALGGNICASERRVLIIIGNYAEDYEVTVPYQTLKVLGCHVDVVCPKKKAGDTCPTAIRDLEGGQTYSEIRGHNFVLTADFESIDASSYDALVLPGGKAPEFLALKEDVIVLVKQFMEARKPVASICHGLEILVAAGVLQGKKCTGYPGIKARVVSSGGTFVEADPIDRCVTDGNLVTAAAWHGQPELISQLMTLLDIQVSF	1151.28	AT3G02720.1	0		Class I glutamine amidotransferase-like superfamily protein			protein DJ-1 homolog D-like
LOC109948161	PRUPE_3G012400	ATGGGGAATCCGAAAGGCGAGGTGCAGAGGAGGGTGTTGTTACTGTGCGGGGACTACATGGAAGATTACGAGGCAATGGTCCCATTTCAAGCACTGCAGGCATTTGGAGTCTCTGTTGATGCAGTTTCTCCTGTCAAGAAAGCTGGTGATATCTGCGCCACTGCCATAACCATTCAAGTAGAGTCCACTGACCAGGCTAATAAAGAATCTCGTGGTCACAATTTCACACTGAATGCAACATTTGATGACATCGAAATTGACAAATATGATGGTCTAGTTATACCAGGAGGACGATCTCCTGAACATCTTGCTATGAAGGCATCCGTTGTAGAATTGGCGAGAAAATTTTCTGACTGCAGAAAGCCAATTGCTGCTATTTGCCATGGGCTGTTGGTCTTA…	MGNPKGEVQRRVLLLCGDYMEDYEAMVPFQALQAFGVSVDAVSPVKKAGDICATAITIQVESTDQANKESRGHNFTLNATFDDIEIDKYDGLVIPGGRSPEHLAMKASVVELARKFSDCRKPIAAICHGLLVLAPAGAVKGRKCTAVSTMKPGLVAAGAHWVEPDTLSVCVADDNLITGVTYYGNPEFIRLFLKALGGNICASERRVLIIIGNYAEDYEVTVPYQTLKVLGCHVDVVCPKKKAGDTCPTAIRDLEGGQTYSEIRGHNFVLTADFESIDASSYDALVLPGGKAPEFLALKEDVIVLVKQFMEAGKPVASICHGLEILVAAGVLQGKKCTGYPGIKARVVSSGGTFVEADPIDRCVTDGNLVTAAAWHGQPELISQLMTLLDIRVSF	648.902	AT3G02720.1	0		Class I glutamine amidotransferase-like superfamily protein			protein DJ-1 homolog D-like
LOC109948297	PRUPE_3G248700	ATGTCTTGGTTTTTTACACTACTCTTTTTGATCAGTTCTCTCTCATTGACTACTCCCTCAGAAGCTAGCCATGAGAAGAAGCCCCCATCTGCAGTTGTTGTAGGCACTGTCTACTGTGACACATGTTTCCAAGCCGAATTCTCACATGCCAGCCACTTCATTTCAGGGGCTTCTGTTGGTGTAGAATGCAAAGATGGGAGTTCAAAACCAAGTTTCCAGACAGAAGTGAAAACAGATAGCCATGGAGTGTTCAGAGTCCATTTGCCTTTCTCTGTGAGCAAGCGTGTCAAGAAAATTGAAGGGTGTTCTGTGAAATTAATCAGCAGCAGTGAACCATATTGTGCTGTGTCCTCAACAGCCACTTCATCTTCACTGCATCTCAAGTCAAGTGAGCAAGGA…	MSWFFTLLFLISSLSLTTPSEASHEKKPPSAVVVGTVYCDTCFQAEFSHASHFISGASVGVECKDGSSKPSFQTEVKTDSHGVFRVHLPFSVSKRVKKIEGCSVKLISSSEPYCAVSSTATSSSLHLKSSEQGTYIFSAGFFTFKPLKQPSLCNQKPSIPNSKEFSSQKSSFPGIPVTSPFPGKTTKAGQLTDKKVGLPGLPGTGLPGLPGLPGIPQLTPFTGKNTKGGQLTDKKLLGLPGLPGLPGLPGLPGLPGLPGLPGLPGLPGLPGLPGLGKAGQLNDKKVARPDTSFTTPQIPKTSLPPNPSPPTSRIPGIPRASSKQTTSP	1091.15	AT5G15780.1	7e-46		Pollen Ole e 1 allergen and extensin family protein			collagen alpha-5(IV) chain-like
LOC109948440	PRUPE_4G216800	ATGACTTCTACTTCTAGGCTTCTTCTTCTTGTGCTCTTTGGTGCTTTCGTTTTCACCACTGGTGCAAGGAAGCTTGGCAGTGAGAAGGCTTCCTTTGAGGATCAGAAAAACTTCAATCACCACAGCGGTGGCGGGCTAGGGGGTGGAGGTGGTGGTGGTCTTGGAGGCGGTGGAGGGTTAGGCGGCGGTGCTGGTGCTGGAGGAGGAGCTGGTTTTGGTGGTGGTGCTGGAGCTGGTGGAGGACTTGGAGGAGGCTTTGGTGGAGGCTTTGGTGGTGGTGGTGGTGGAGGAGTAGGTGGTGGAGCAGGTTTTGGGGCTGGCGGAGGGTTTGGGGCTGGCGGTGGTGCTGGTGGTGGAGTTGGAGGCGGTGGTGGAGGAGGGTTCGGAGGTGGTGGTGGT…	MTSTSRLLLLVLFGAFVFTTGARKLGSEKASFEDQKNFNHHSGGGLGGGGGGGLGGGGGLGGGAGAGGGAGFGGGAGAGGGLGGGFGGGFGGGGGGGVGGGAGFGAGGGFGAGGGAGGGVGGGGGGGFGGGGGGGLGGGAGGGFGGGAGAGGGLGGGFP	443.301							glycine-rich protein 5
LOC109948560	PRUPE_4G080900	ATGGACTCCACTGTGAAGCATGCTGTGGTTGTGAAAGTTATGGGTCGGACTGGATCTCGTGGGCAGGTGACTCAAGTAAGAGTCAAGTTTTTGGATGACCAGAATCGGTTCATCATGAGGAATGTGAAGGGACCAGTGAGGGAGGGGGATATCCTTACCTTGCTCGAGTCTGAGAGGGAAGCTAGAAGGTTGCGTTGA	MDSTVKHAVVVKVMGRTGSRGQVTQVRVKFLDDQNRFIMRNVKGPVREGDILTLLESEREARRLR	401.922	AT5G03850.1	4e-34		Nucleic acid-binding, OB-fold-like protein			40S ribosomal protein S28
LOC109948582	PRUPE_4G003700	ATGGAGGGCAGAGATAATGAGGAAAAAGGGCCCGAAGCGGAAGAAGGTAGGAACTACTGCAGAGGACTGTCGAAGAGCGCACAGAAGAAGCTGTTAAAGCAGCAGAAATGGGAAGCGAAGAAGGCAGAGAAGAAAGCTCTGGAAAAAGAGCAGAAGAAGAGAGAGGGGGAGCGGAAGCGGAAGGAATGGGAGGAGAGATTGGCGAGCGTTAGCGAAGAGGAGAGGGGGAAGCTGATAGAGTCGAGGAAGAGTTTAAGGAAGGAGAGGATGGAGCAGAGGTCAGAGGAGAGAGAGAGAAACACAGAGAGACTGAGCAGAGCCAAAGAGTGCGGACAGAAGATTGTGATCGATCTCGAATTCTCTCACCTCATGACCCCAGCCGAGATCAACAGCCTCGTT…	MEGRDNEEKGPEAEEGRNYCRGLSKSAQKKLLKQQKWEAKKAEKKALEKEQKKREGERKRKEWEERLASVSEEERGKLIESRKSLRKERMEQRSEERERNTERLSRAKECGQKIVIDLEFSHLMTPAEINSLVQQIMYCYAVNKRCREPGHLWLTGCKGEMGTQLKRLPGFDNWIIEKEDRSYMEALEDEKQNLVYLTADSENVVDDLDSSKIYIVGGLVDRNRWKGITMKKAEEQGIQTAKLPIANYLNMSSSQVLTVNQVIEILLKFLETKNWKDSFFQVIPQRKRCQADSEQSQQVKGGENGIDSEEKNDQFESKKQCAQDSTSQAPSHD	259.322	AT5G47680.1	3e-126	TRM10, AtTRM	FUNCTIONS IN: molecular_function unknown; INVOLVED IN: biological_process unknown; LOCATED IN: cellular_component unknown; EXPRESSED IN: 23 plant structures; EXPRESSED DURING: 13 growth stages; CONTAINS InterPro DOMAIN/s: tRNA (guanine-N1-)-methyltransferase (InterPro:IPR016009), tRNA (guanine-N(1)-)-methyltransferase, metazoa (InterPro:IPR016653), tRNA (guanine-N1-)-methyltransferase, eukaryotic…			tRNA (guanine(9)-N1)-methyltransferase
LOC109948609	PRUPE_4G177600	ATGAAGTTCTTATTCCAGTGCCCCTGCTGCTCTTGTTTCTGCTTCATGAAGCCCAAGAAAGGCAAGGCAAGGGTGAAGGCAGCAGCAACGGTAGCATCCAAGGAAGAGAAGAAAGTTGAAACCAAGGGAGAGAAGAAGGTTGAATCCAAGGAAGAGAAGAAAGAATGACAACAATGCAGCTACCTACAATCAGATAGTGCATGCATAAATGAAAGCATATGTGCTTTGTTTATGCTTTTCTTTCTTCTTGTTGATTAA	MKFLFQCPCCSCFCFMKPKKGKARVKAAATVASKEEKKVETKGEKKVESKEEKKEXQQCSYLQSDSACINESICALFMLFFLLVD	634.647	AT5G53880.1	1e-08		unknown protein; FUNCTIONS IN: molecular_function unknown; INVOLVED IN: biological_process unknown; LOCATED IN: mitochondrion, plasma membrane; EXPRESSED IN: 23 plant structures; EXPRESSED DURING: 13 growth stages; Has 30201 Blast hits to 17322 proteins in 780 species: Archae - 12; Bacteria - 1396; Metazoa - 17338; Fungi - 3422; Plants - 5037; Viruses - 0; Other Eukaryotes - 2996 (source: NCBI BL…			uncharacterized
LOC109949075	PRUPE_5G135300	ATGATACTGGTGGCGGGTCTGGCTGAGCTGATGGAGGAGTATACGTTTTTGTTGGCAAGGGTTTTGGAGCATTTGTTCCATTCTGCTCCTTTTCCGAGGCGGGTTCGGTTTCTCATCCTCCGAAGTCTTCCCTTTGTTTCTTCCTACCCTCTTCCTCCTCCTCCTCCTCTGATAGGAGCCCCTGCTGCTGCTTAA	MILVAGLAELMEEYTFLLARVLEHLFHSAPFPRRVRFLILRSLPFVSSYPLPPPPPLIGAPAAA	221.627	AT1G33055.1	9e-14		unknown protein; FUNCTIONS IN: molecular_function unknown; INVOLVED IN: anaerobic respiration; LOCATED IN: endomembrane system; EXPRESSED IN: 13 plant structures; EXPRESSED DURING: 6 growth stages; Has 20 Blast hits to 20 proteins in 8 species: Archae - 0; Bacteria - 0; Metazoa - 0; Fungi - 0; Plants - 20; Viruses - 0; Other Eukaryotes - 0 (source: NCBI BLink).			uncharacterized
LOC109949082	PRUPE_5G067000	ATGCCTTTCAGGAGATTGATAGAGGTGGAACCGCCGAGCCCACTGAGATACGTGATCGGAGCGGCCATCATGATGATCGGAGTAGTCTTACCCGTCGGTTACATGATGTTCCGTAACAAGCGTGTTCCTTCTTCCTCTTCCTACTCCAAACAGACGAACAAAGTTTTAATATAG	MPFRRLIEVEPPSPLRYVIGAAIMMIGVVLPVGYMMFRNKRVPSSSSYSKQTNKVLI	200.674	AT4G16695.1	4e-29		unknown protein; FUNCTIONS IN: molecular_function unknown; INVOLVED IN: biological_process unknown; LOCATED IN: endomembrane system; Has 21 Blast hits to 21 proteins in 11 species: Archae - 0; Bacteria - 0; Metazoa - 0; Fungi - 0; Plants - 21; Viruses - 0; Other Eukaryotes - 0 (source: NCBI BLink).			uncharacterized
LOC109949127	PRUPE_5G187900	ATGTCGACTCCTGCGAGGAAGAGGCTGATGAGAGACTTCAAGAGGCTGCAACAAGACCCACCTGCAGGGATTAGTGGGGCGCCCCAAGATAACAATATAATGCTGTGGAATGCTGTTATATTTGGTCCAGATGATACCCCTTGGGATGGAGGCACGTTTAAGTTGACCCTTCAGTTTACAGAGGATTACCCAAACAAACCACCGACAGTCCGATTTGTTTCTCGAATGTTTCATCCAAATATTTATGCAGATGGAAGTATTTGTTTGGATATTTTACAGAATCAGTGGAGTCCTATATATGATGTGGCAGCTATACTCACATCTATTCAGTCACTACTATGTGATCCCAACCCAAACTCTCCTGCTAATTCAGAAGCTGCTCGCATGTTTAGCGAGAAC…	MSTPARKRLMRDFKRLQQDPPAGISGAPQDNNIMLWNAVIFGPDDTPWDGGTFKLTLQFTEDYPNKPPTVRFVSRMFHPNIYADGSICLDILQNQWSPIYDVAAILTSIQSLLCDPNPNSPANSEAARMFSENKREYNRRVREIVEQSWTAD	239.469	AT2G02760.1	7e-110	ATUBC2, UBC2	ubiquiting-conjugating enzyme 2			ubiquitin-conjugating enzyme E2 2
LOC109949169	PRUPE_5G228300	ATGTCCTCCCGCAAGCTCCTCTCGACTCTCATCCGTACCTCTCTCCGCCGGACCGTCGCAACGACCAAAACCGCAGTCCCCAGATCCCCCCTCACGCGCTCCACAGGGTATCTCCTCTCACGCGTCGCCCACTACTCCACATCATCGGCTGTCGCACCATCTGCGCCTCCCAAACCCGCTACAAAATCTGTGAGTGGCAAAATCACCGACGAGTTCACCGGAAAGGGGGCCATTGGCAAGGTCTGTCAAGTCATCGGGGCCGTCGTCGATGTTCGGTTCGACGATGGCTTGCCGCCGATCCTCACGGCTCTCGAGGTCTTGGACAACTCGATCCGATTGGTGCTTGAGGTAGCTCAGCATCTAGGCGAGAACATGGTCAGAACCATTGCCATGGATGGG…	MSSRKLLSTLIRTSLRRTVATTKTAVPRSPLTRSTGYLLSRVAHYSTSSAVAPSAPPKPATKSVSGKITDEFTGKGAIGKVCQVIGAVVDVRFDDGLPPILTALEVLDNSIRLVLEVAQHLGENMVRTIAMDGTEGLVRGQRVLNTGSPITVAVGRATLGRIMNVIGEPIDERGEIKTDHFLPIHREAPAFVEQATEQQILVTGIKVVDLLAPYQRGGKIGLFGGAGVGKTVLIMELINNVAKAHGGFSVFAGVGERTREGNDLYREMMESGVIKLGDQQSESKCALVYGQMNEPPGARARVGLTGLTVAEHFRDAEGQDVLLFIDNIFRFTQANSEVSALLGRIPSAVGYQPTLATDLGGLQERITTTKKGSITSVQAIYVPADDLTDPAPATTFAHL…	236.026	AT5G08680.1	0		ATP synthase alpha/beta family protein			ATP synthase subunit beta, mitochondrial
LOC109949213	PRUPE_1G484300	ATGGAGATGCAGAGCCTCTGCTCCAACAGCCTCGTTTTGGATGGTTTTCTCTCCTCTGTAGTGCAGGCTATGGTAGCTGAGGCAGCCATTGCTGCTGCCAAGTCTATTGCTTTGTCCTTCTGGATGATGGGATCTATTCCTAACACAACCACTGTTTTTCCCAAAGAACCTGAGGAACTCACAGGATTTCCTATCACTGAGCTTTTTGCAGTGGAAAAACCTGGTCCAGAGAACAAAGATGCAAGTGAAACTGAGGACGACGACGACGACGACGACGATGATGATGATGATGCTGCTGCTGGTGATGACCAGGATGATGATGGAGGTGATGCGGATGATGCCTCTGGGGAAGAGAATGAGGGTAAAGCAAATCCAGAAGACGAGCCTGAGGCCAATGGT…	MEMQSLCSNSLVLDGFLSSVVQAMVAEAAIAAAKSIALSFWMMGSIPNTTTVFPKEPEELTGFPITELFAVEKPGPENKDASETEDDDDDDDDDDDDAAAGDDQDDDGGDADDASGEENEGKANPEDEPEANGDGVSEEDGDDDDDDDDDDDDDDGDDGEEDTEDDEEDEEDEEEEIPQPPAKRRK	312.707							prostatic spermine-binding protein-like
LOC109949257	PRUPE_5G066300	ATGGCCGCCATCTCACTCTCTCTCTCTCCAAACCCTAGCTTCACGACCACCACCACCCACAAGCCTTCCCACGCCCTCTCTACCCCCACCTTTCTCAAATTCCCAACCGTATCCCCATCCACCATCAAATCCCTTACCTACGCGCCCCTACCCCAAACCCCAACCCCACGCGCCACCTTCTCCACACGCGCCGCCGCATCCCCAACCCCATCCACCACATTCCACGGCCTCTGCTATGTCCTCGACGATAACATCGACACCGATCAGATCATCCCCGCCGAGTACCTGACCCTAGTCCCCTCCAACCCCTCTGAGTATGAGAAGCTCGGATCCTACGCGCTCTGCGGTCTCCCGGACGCCCACTCCACGCGCTTCGTGGACCCGGGCAAGACCAAGTCC…	MAAISLSLSPNPSFTTTTTHKPSHALSTPTFLKFPTVSPSTIKSLTYAPLPQTPTPRATFSTRAAASPTPSTTFHGLCYVLDDNIDTDQIIPAEYLTLVPSNPSEYEKLGSYALCGLPDAHSTRFVDPGKTKSKYSIIIAGANFGCGSSREHAPVALGAAGVAAVVVESYARIFFRNSVATGEVYPLESEVRVCEECKTGDVVSIELSESRLINHTTGKEYTLKPIGDAGPVIRAGGIFAYAREAGMIPTLTSS	220.957	AT2G43090.1	2e-104		Aconitase/3-isopropylmalate dehydratase protein			3-isopropylmalate dehydratase small subunit 3-like
LOC109949294	PRUPE_5G148500	ATGGGGGAGGAGGAGAAAAAAATGGAGGAGAAAAAGCCAGAGGAGGTGAAGAAGCCAGAGGCAGAGGAGAAGAAAGAAGAGAAGAAAGAAGAAGAGAAAAAGCCTGAAGCTGAGGAAAAGAAGGAAGAGAAGAAGGCTGATGCTGCTCCTCCACTGCCACCGCCACCTCAAGAAATTGTGCTCAAAGTTTATATGCATTGTGAAGGCTGTGCTCGCAAGGTCAAGAGGCGTCTCAAAGGCTTTCAAGGGGTGGAAGATGTGAGCACAGATTGCAAGACTCACACGGTGGTTGTGAAGGGTGAGAAGGCTGATCCAATTAAGGTTCTTGAGAGAGTTCAGAGGAAGAGTCGTGGACAGGTTGAGCTTCTCTCTCCAATCCCAAAGCCACCAGCTGAGGAG…	MGEEEKKMEEKKPEEVKKPEAEEKKEEKKEEEKKPEAEEKKEEKKADAAPPLPPPPQEIVLKVYMHCEGCARKVKRRLKGFQGVEDVSTDCKTHTVVVKGEKADPIKVLERVQRKSRGQVELLSPIPKPPAEEKKPEEKEQPKPEEKKEEPVVITVVLKVHMHCDACAQEIKKRILRMKGVESAEPDLKSSEVTVKGVFDPPQLVEYVHKRTGKHASIVKQEPEKKDKEEAKEEEKKGGEEGDKDKKGKDEEAKPEEKKGDEAPPAAAAAPDAAAAAEGGAATEETKVVELMKKNEYYYYPPRYAMELYAYPPQIFSDENPNACSVM	762.657	AT5G50740.1	2e-87		Heavy metal transport/detoxification superfamily protein			heavy metal-associated isoprenylated plant protein 7-like
LOC109949569	PRUPE_6G130500	ATGGCGAAAGTGGTAGCGGAAGCGGAGGAGCTGCCGAAGGCTATCGTGCGCCGAGTGGTGAAGGATAAGCTTTCCCAGTGCTCCAAGGGCGACGGTGACCTAACTCTTCACAAAGAAGCCCTCTTGGCTTTCTCCGAGAGCGCCCGAATTTTCATCCACTACCTTTCCGCCACAGCAAATGACATATGCAAGGAAAAGAAGAGGCAGACGATCAGCGCCGACGATGTTTTGAAAGCGCTGGAAGAGATTGAGTTCTCCGAGTTTATCAAGCCTCTTGAGGCCTCTCTTAAAGGAAAGAATCCAGGAAAGAATGCAGAAAAGAGTGGAGGAAAGAATGCAGGAAAACAGAAAGCAGGAACATCAAAAGCAAAGGAAGTGAAGAAGAAGAGGAAATTGGAA…	MAKVVAEAEELPKAIVRRVVKDKLSQCSKGDGDLTLHKEALLAFSESARIFIHYLSATANDICKEKKRQTISADDVLKALEEIEFSEFIKPLEASLKGKNPGKNAEKSGGKNAGKQKAGTSKAKEVKKKRKLEEPSSRKLKEKEEDNQDENGSDDE	208.376	AT2G27470.1	1e-41	NF-YB11	nuclear factor Y, subunit B11	TF		DNA polymerase epsilon subunit 3
LOC109949857	PRUPE_1G320000	ATGGGAAGCACGAGCTGTGCTTCCATTTCCAACTTGAACTTCATTCGGAGTCGCAGCCACAATTGCTTCCAGCGGCTTGGGCCAATGAGAAACCAGCTGGGTTCTGTTCGAGTCCACCATTCGAGGAGGCCAAGACTGGAGCTCAATGGTTTGCGGAGCCGGAAGAGCTTACGAAACGACGTAGTCTGCTTCGCTGTTGATGACGATTTGAGAGAGAAGCAGCAAGAGTTTGGCGCTGGGTCTGGGATTGGCTCCGCCGTCGAGGATAGGCCTGCTACTGATGTGGTTGATGGCTCAAAAGAAGAGAATGGAAGTGCTGTTTACAATTTTCTATATCCTAGTCAAGAGCTCCTCCCGGACGATAAAGAGATGAGTATATTTGATCATCTGGAAGAGCTG…	MGSTSCASISNLNFIRSRSHNCFQRLGPMRNQLGSVRVHHSRRPRLELNGLRSRKSLRNDVVCFAVDDDLREKQQEFGAGSGIGSAVEDRPATDVVDGSKEENGSAVYNFLYPSQELLPDDKEMSIFDHLEELRQRIFISVLAVGVSMLGCFAYSKELIIFLEAPVKDQGVKFLQLAPGEFFFTTLKVSGYCGLLLGSPIILYELIAFVLPGLTREERKFLGPIVLGSSVLFYAGISFSYFVLTPAALNFFVTYAEGVVESLWSIDQYFEFVLVLMFSTGLSFQVPVIQFLLGQVGLVSGDQMLSIWRYVVVGAVVAAAVVTPSTDPLTQVLLAAPLLGLYFGGAWVVKLTGR	224.545	AT2G01110.1	2e-153	APG2, UNE3, PGA2, TATC	Sec-independent periplasmic protein translocase			sec-independent protein translocase protein TATC, chloroplastic
LOC109949941	PRUPE_6G303400	ATGGCTACAGAAATTGCTGCATCACATCATGTTCCTACCACTGATGACGAGCAAGTTGAAAAGAAGGTGAGTGAAGAAGAAAAGGCTTCTGAAAAAGAAAGTGTTTCTTTACCCCAAGGAAGTGGAGAAGAAATAACCAAAACTGAGGATGCAGCAAGTCTAGCAACACCAGCTGAGTCTGAAGGTGTTGATCATAAGAAGATTGAGCCTCCTGTAGTTGAGGCTGAGAAGACTAATGGTGCTCCTGTGCCAGATGTTCCGGTGGGAGTCGAAACGAAGGTGGAAAATGAATCCATTGCAGATTCACAAACACACGCTATTCCAAAGCAAGTGGCTGATGCTGCTGAGAGCTCAATAGAGGTTAAGACATGCATTGACTCTGTAGTAGGAGAAGCACCA…	MATEIAASHHVPTTDDEQVEKKVSEEEKASEKESVSLPQGSGEEITKTEDAASLATPAESEGVDHKKIEPPVVEAEKTNGAPVPDVPVGVETKVENESIADSQTHAIPKQVADAAESSIEVKTCIDSVVGEAPIEPSVGIIEIGQVEQPKIVDAPQSSVEAIEKPKESVATVLKEIKDSEPELAIAKVEEKPKDQSEFSQVEKKHDEEPEELVQDETVKDEGPVADKVEHITFLEQGKIETVDTPSLAVEDEPEQRKFTAEEKKYEVEPEKSVEDGRVKDEGSLIGKDKEPTFLEEGKTDKDDKPSLIGSPEEASLSREAQIKLQDEGDSSLPEVTEKITTEDHKKESSGVDVVEKLAKEAAVETEKVGEENAETGKVEREKVETEDSTQPIKEDQKKE…	210.146	AT3G05900.1	4e-10		neurofilament protein-related			titin-like
LOC109949949	PRUPE_6G003500	ATGGAGGCAATGAAGATGAATGCTTTTGTGGCTTTGTTGGTGGTTGTGATGGTGGCCTTGTCTGGCGTTCAAAAAGTAGCTGCAGCTGATTCTCCAGCACCAAGCCCAGCTTCTGATGCCTATGCCTTTGCCCCCACTTTCTTTGCATCTCTAGCAGCTTTGGCTTTTGGGTTCTTCTTCTGA	MEAMKMNAFVALLVVVMVALSGVQKVAAADSPAPSPASDAYAFAPTFFASLAALAFGFFF	621.539	AT5G56540.1	3e-17	AGP14, ATAGP14	arabinogalactan protein 14			arabinogalactan peptide 14-like
LOC109950176	PRUPE_7G228100	ATGAAGAAGAAGACCACCCTCCTTGATCTCTCACTTCTTCTCATCACCTTCGTTCTCGCCTCCTCATCACTCTCTGTCGTCTGTGGTGCTCAGGAGTACCACCACCACAACGGCATTATCAGCCATGGAGCTCTCTCCCACGCCGAAGCCCTCTACATCAAGCAGCGCCAGCTCCTCTACTACAGGGACGAGTTCGGCGACCGAGGCGAGCTAGTCACCGTCGACCCATCTCTGGTTTTCGAGAACCAGAGAATCAGAAATGCTTACATAGCTTTACAAGCTTGGAAGCAAGCCATTCTCTCCGACCCGCTTAATCTCACGGGTAATTGGGTCGGATCTAATGTCTGCAACTACACCGGAGTCTTCTGCACAAAAGCCCTAGACAACAGCTCCATCCGA…	MKKKTTLLDLSLLLITFVLASSSLSVVCGAQEYHHHNGIISHGALSHAEALYIKQRQLLYYRDEFGDRGELVTVDPSLVFENQRIRNAYIALQAWKQAILSDPLNLTGNWVGSNVCNYTGVFCTKALDNSSIRTVAGIDLNHGDIAGYLPEELGLLADLALFHINSNRFCGTVPHKFKQLKLLFELDISNNRFAGRFPRVVLQLPKLKFLDLRFNEFEGTVPKELFDKDLDAIFINHNRFRFDLPDNFGNSPVSVIVLANNKFHGCVPASLGNMSNLNEIILMNNGFRSCLPEEIGMLKNLTVFDVSFNQFLGSLPETIGGMVSLEQLNVAHNLLSGTIPASICSLPRLQNFTYSYNFFTGEPPVCLGLASFDDKRNCLPNRPAQRPAAKCKSFLSRPV…	284.771	AT3G24480.1	0		Leucine-rich repeat (LRR) family protein			leucine-rich repeat extensin-like protein 4
LOC109950192	PRUPE_7G237700	ATGGCCTCGTGGCCTTCATCGTCCGATCCCTCTAATCAGCAGGCTGCTATAAGAAAGAGAAGCCCGGGGTCCCAATTTAAGTTCTTGGTTCCTCTTATATATGCCCCTGTTCTTCCGCTCATTCGACTGTCGCTGCGTAAGAACCCAGTTGTACGGGACCGTTTGTTTACTGCTGTGTTGGTGGGAGCATTTGCTCATGGCTTTTATTTGGTAATCTATACTATAATGATGGAGCAGAAGGGGATGGTAAAGCACATTTCTTTCTTTGCATGA	MASWPSSSDPSNQQAAIRKRSPGSQFKFLVPLIYAPVLPLIRLSLRKNPVVRDRLFTAVLVGAFAHGFYLVIYTIMMEQKGMVKHISFFA	208.233	AT1G68680.1	1e-24		unknown protein; FUNCTIONS IN: molecular_function unknown; INVOLVED IN: biological_process unknown; LOCATED IN: chloroplast; EXPRESSED IN: 23 plant structures; EXPRESSED DURING: 16 growth stages; Has 20 Blast hits to 20 proteins in 11 species: Archae - 0; Bacteria - 0; Metazoa - 0; Fungi - 0; Plants - 20; Viruses - 0; Other Eukaryotes - 0 (source: NCBI BLink).			uncharacterized
LOC109950454	PRUPE_7G006500	ATGGAAGACAAAATTGAACATCCAGGGGAAGAAAGGGTTGAAAAGGAAGAATCCCATGTAGTGGTCAAGACCAAGGATGCACAACCAGGTGAATTAAAGAAGGAGAAGGCTGAGGTGGAACTTGAATTAAAGACCAAGTCAGTGGTAAAAGAGAAGCCAAAACATAAAAAGGATGAGGAGAAACATATTGATAAAGATGAGGAGAAATCAAAGAAGAAGGAGAAAGACATAACCAAGAAGGAAAAGAAGAAAAAAAACAAGAGTGGCAAAGAGAAGGACGAGGAAGAGAAACAGAGCAACGGGGATAAAAAGAAGGACAAGGAAGAGAAGAAGAAGAAAAAGGAGAAGAACAAAGATATTATAGGCTCAGAAGATAAAGAAGATGATAGAGAGGGGGAG…	MEDKIEHPGEERVEKEESHVVVKTKDAQPGELKKEKAEVELELKTKSVVKEKPKHKKDEEKHIDKDEEKSKKKEKDITKKEKKKKNKSGKEKDEEEKQSNGDKKKDKEEKKKKKEKNKDIIGSEDKEDDREGEEKDKKKKNKKEKKEKGKDLDEGEEEIEGKDDYKHKEKDMDEKESKKEKKDQVKVKEDEEKRKDTDKKEEDADNVDEEKEENKKKKKKKEKKGKEHENDDDGTEKKNDEEKVDDIKKEGKKKKDVEEKRKKHKGDDDEKEKKMDEEKDDDNKKEGKKQKDVEEKKKEHKGDDDEKEKKKDEEKDNDSKKEGKKNKDKDDKKKKHKGDDDGNEKKKDEKKEEKIDKKERKEKHNNVEDEEKTKVEVTSREIEIEHVKESEDEMEEQSQ…	619.482							glutamic acid-rich protein-like
LOC109950457	PRUPE_7G258200	ATGCCGTCGCACAAGACCTTCAGGATCAAGAAGAAGCTGGCGAAGAAGATGAGGCAGAACCGACCCATTCCTCACTGGATCCGCATGAGGACCGACAACACCATCAGGTACAATGCTAAGCGCAGGCACTGGCGCCGTACCAAGCTCGGGTTTTGA	MPSHKTFRIKKKLAKKMRQNRPIPHWIRMRTDNTIRYNAKRRHWRRTKLGF	759.07	AT4G31985.1	2e-28		Ribosomal protein L39 family protein			60S ribosomal protein L39
LOC109950562	PRUPE_8G208000	ATGGCAAGGTGGTGCATTGTGCTGGTTCTTGCTCTAGTTGTAGCTCACACTACAGCTAGAAACGTGCCTACAGCGAATGACGCTGGTTTCAAAGACCAAAAGAACTTCCTCGGTGGCGTTGGTGGCTTCTCTGGTATTGGCAGCAATGGGCTTCCATTTGCTGGAGCAGGGGCTGGTGTTGGTGGTGATCTTGGCGGCGGACTTGGTGGAGGCGCTGGGATAGGCGGAGTTGCCGGGCTTGGTGGTGGTAGTGGTGGAATCGGTGACTTGGGTGGTGCAGGCGGCTTGGGTGGTCTTGGTGGTTTAGGCGGCGGCACCGGAGGCTTGGGTGGTCTAGGGGGCTTAGGAGGCGGCACCGGAGGCTTGGGTGGTCTAGGAGGCTTAGGAGGCGGCACCGGA…	MARWCIVLVLALVVAHTTARNVPTANDAGFKDQKNFLGGVGGFSGIGSNGLPFAGAGAGVGGDLGGGLGGGAGIGGVAGLGGGSGGIGDLGGAGGLGGLGGLGGGTGGLGGLGGLGGGTGGLGGLGGLGGGTGGLGVLGGVGGAGGGIGGGVGGGSGVLPYP	332.416							glutamic acid-rich protein-like
LOC109950595	PRUPE_8G242800	ATGGGGAAGCCGACGGCTACGCAGCAAGCGATGGTGGTGTTCGGAGCCCTAGCGGTTGGTTGGCTGGCCATAGAGATGGCTTTCAAGCCCTGGCTTGACAAGGTTCGTGCCGCCATGGACAAGTCTGACCCTGCTCGCGACCCCGACGAAGACGACGTCGTCAAGGCTGACGAGACCGCTGCTGATGAATGA	MGKPTATQQAMVVFGALAVGWLAIEMAFKPWLDKVRAAMDKSDPARDPDEDDVVKADETAADE	403.453	AT3G52420.1	3e-18	OEP7, ATOEP7	outer envelope membrane protein 7			outer envelope membrane protein 7
LOC109950601	PRUPE_8G192000	ATGGCCAAATCTACAACAAGACCTAAATTACTCTTACTATTCTTCACATTAATCTTTGCAGCATATGTTTTACAAGGATCCAGAACCCAAGTAGCAGCACTTCCACACCAGCAAAGGGTCTATGATTCTTCTCCACCACAAGAAGAACAACTACTTAAGCAGAGCAGGAAGGAAACCATGAACTACGCAAGGAGATTGATGATTGGATCCACAGCACCAACATGCACTTTTAATGAGTGCAGAGGGTGCAAGTTCAAGTGCAGAGCAGAGCAAGTGCCAGTGGAGGGAAACGACCCAATTAATAGTGCCTACCACTACAGATGTGTGTGCCATAGGTAA	MAKSTTRPKLLLLFFTLIFAAYVLQGSRTQVAALPHQQRVYDSSPPQEEQLLKQSRKETMNYARRLMIGSTAPTCTFNECRGCKFKCRAEQVPVEGNDPINSAYHYRCVCHR	245.497	AT4G12970.1	3e-30	STOMAGEN, EPFL9	stomagen			EPIDERMAL PATTERNING FACTOR-like protein 9
LOC109950660	PRUPE_8G096400	ATGGCCTCTGCCGAGATCGAGTTCCGTTGCTTCGTCGGAGGGCTCGCCTGGGCCACCGACAATGATGCGCTGGAGAGGGCCTTTTCTCCGTTCGGTGAGATCATCGAATCGAAGATCATCAACGACCGTGAGACCGGGAGGTCCAGGGGCTTTGGCTTCGTCACCTTCAGCAATGAGAAGGCCATGAGGGACGCGATCGAAGGCATGAACGGCCAGAACCTCGACGGCCGCAACATCACCGTTAACGAGGCTCAGTCTCGTGGAAGCGGCGGTGGTGGTGGCGGTAACGGAGGAGGTTACAGCCGCGGAGGTGGCGGCGGGGGATATGGCGGTGGCTACGGAGGTGGCGGCCGACGTGAAGGTGGCGGTGGTGGCTACAGCCGTGGAGGCGGCGGTGGT…	MASAEIEFRCFVGGLAWATDNDALERAFSPFGEIIESKIINDRETGRSRGFGFVTFSNEKAMRDAIEGMNGQNLDGRNITVNEAQSRGSGGGGGGNGGGYSRGGGGGGYGGGYGGGGRREGGGGGYSRGGGGGGYGSGGGGYGGGGRREGGYGGGEGGGARYSRGSGGSEGGSWRS	2267.59	AT4G39260.3	2e-46	CCR1, ATGRP8, GR-RBP8, GRP8	cold, circadian rhythm, and RNA binding 1			glycine-rich RNA-binding protein-like
LOC109950727	PRUPE_8G163000	ATGGGTGAGAGACTGAGTGGTACCGTCAAGTGGTTCAATGACCAGAAGGGGTTCGGCTTCATCACCCCCAACGATGGCGGCGACGATCTGTTCGTCCACCAGTCCTCGATCCGAACGGAGGGGTTTAGGACCCTCGGCGATGGCGAGTCCGTGGAGTTCCAGATCGAATCTGACAGCGATGGCCGCACCAAGGCGGTTGATGTGACAGGACCCGCCGAGGGTCCCGTTCAGGGAAGCCGTGGTGGCGGCGGTGGTGGTGGTGGTAGAGGCCGAGGTGGCGGCGGTGGGGGGTATGGGTTTAACGGTGGAGGTGGAAGAGGCGGAGGGGGTAGAGGTGGGAGAGGAGGCGGTGGCTATGGAGGTGGTGGATACGGCGGTGGCGCTGGTGGATATGGCGGC…	MGERLSGTVKWFNDQKGFGFITPNDGGDDLFVHQSSIRTEGFRTLGDGESVEFQIESDSDGRTKAVDVTGPAEGPVQGSRGGGGGGGGRGRGGGGGGYGFNGGGGRGGGGRGGRGGGGYGGGGYGGGAGGYGGGGGYGGGGGGGACFKCGESGHMARDCDQGGSGGGYGGGGGYSGGGRGGGGGSSGGCYGCGESGHFARECPNRS	500.944	AT2G21060.1	5e-43	ATGRP2B, ATCSP4, GRP2B	glycine-rich protein 2B			glycine-rich protein 2
LOC18765979	PRUPE_3G134800	ATGGCGCCACAAGATCCGAACACCCCAAGCGGCATCGGCAAGCGCGATGAGGAGTCCGTCAAAGTGCCCGCCAAGGATCCCAAGAAGAAAGACGAAAAGAAGGATGAGGATTTGTCTGAGGAAGATTTGGAGTTGAAGAAGAACTTAGAGTTGTACGTGGAGAGGGTTCAGGATCCTAATCCTGCGTTGCAGAGGAATGCTCTAGAGAGCATGAGGCAGGAAATCCGTACCTCAACTAGCTCCATGACTTCAGTTCCGAAGCCATTAAAGTATCTTCGTCCGCATTATGGAACTCTAAAAGCATTCTATGACACAATGGCAGATTCAGATTTGAAGAAATACCTAGCAGACATATTGTCAGTTTTGGCACTGACCATGTCTGCCGAGGGAGAACGGGAA…	MAPQDPNTPSGIGKRDEESVKVPAKDPKKKDEKKDEDLSEEDLELKKNLELYVERVQDPNPALQRNALESMRQEIRTSTSSMTSVPKPLKYLRPHYGTLKAFYDTMADSDLKKYLADILSVLALTMSAEGERESLKYRLLGSEGDIGSWGHEYVRNLAGEISQEYAKRQSEEAPIDDLMELVQQIVAFHMKHNAEPEAVDLLMEVEDLDLLVEHVDKTNFKRTCLYLTSSARYLPGPDDTLVLDIAYLIYMKFEEYPNALQIALFLDNLQNVRQVFQSCDDLLRKKQFCYILARHGISFELDDEMVAEDDDREALQDIINNSKLSEGYLTLARDIEVMEAKTPEDIYKAHLLDGRASAGASVDSARQNLAATFVNAFVNAGFGQDKLMTVPSDASSGGN…	345.475	AT2G20580.1	0	RPN1A, ATRPN1A	26S proteasome regulatory subunit S2 1A			26S proteasome non-ATPase regulatory subunit 2 homolog A
LOC18766010	PRUPE_3G139400	ATGGCTGATGGGTCATCCCATCCATTGGTATTTCAGAAGATACATGGGCAGTCTTCTCTCATTTCTAGGCTTTCCCCCAACTTGCACACAAGAAACCATGGTGTGACTGGTGCTTATGCCAATGGAGGTTTGCAGAGGCCCCTTCTAACATTTGAAAGCACTGCCCTTGCACAAGTCTCTCCTTTGCCCCCCATTGTGGTACAGGCTCCAGTAGAGAAAGGTGCAGCTGGTTTTGCTGTGGATTTCCTCATGGGAGGTGTATCTGCTGCTGTTTCCAAAACCGCAGCTGCTCCAATTGAGCGTGTTAAACTACTAATACAGAATCAGGATGAGATGATCAAGGCTGGTCGGCTTTCTCAACCATACAAGGGTATAACTGACTGCTTTGCCCGGACAATT…	MADGSSHPLVFQKIHGQSSLISRLSPNLHTRNHGVTGAYANGGLQRPLLTFESTALAQVSPLPPIVVQAPVEKGAAGFAVDFLMGGVSAAVSKTAAAPIERVKLLIQNQDEMIKAGRLSQPYKGITDCFARTIKDEGVLALWRGNTANVIRYFPTQALNFAFKDYFKRLFNFKKDKDGYWKWFAGNLASGGAAGASSLLFVYSLDYARTRLANDAKAAKKGGERQFNGLIDVYKKTLKSDGIAGLYRGFNISCVGIIVYRGLYFGMYDSLKPVVLTGGLQDSFFASFLLGWGITIGAGLASYPIDTVRRRMMMTSGEAVKYNSSLDAFKQIIKKEGSKSLFKGAGANILRAVAGAGVLAGYDKLQVVLLGKKYGSGGGG	280.514	AT4G28390.1	0	AAC3, ATAAC3	ADP/ATP carrier 3			ADP,ATP carrier protein 3, mitochondrial
LOC18766058	PRUPE_3G134400	ATGGCGGACGACGATTACAACGAAATGGATATGGGGTATGAGGATGAGCCAGTGGAGCCAGAGATTGAAGAAGGTGCAGAGGAGGAAGATGTAGAGAACGCAAATAATGATGATCTTCCAGGAGAAGCCGTTGAAGCTGATGACAAAGAAGAACAAGCACCCGTGGAACGGCCTCGGAGAACATCCAAATTTATGACCAAATACGAACGGGCCAGAATCTTGGGTACCCGTGCTGTGCAGATCAGCATGAATGCGCCTGTGATGGTTGAGTTGCAGGGTGAGACTGATCCACTTGAGATTGCTATGAAGGAGCTTCGTGAGCGGAAGGTACCCTTCACCATACGCCGGTACCTCCCTGATGGAAGTTATGAAGATTGGGGAGTAGATGAGTTGATTGTG…	MADDDYNEMDMGYEDEPVEPEIEEGAEEEDVENANNDDLPGEAVEADDKEEQAPVERPRRTSKFMTKYERARILGTRAVQISMNAPVMVELQGETDPLEIAMKELRERKVPFTIRRYLPDGSYEDWGVDELIVEDSWKRQVGGN	241.574	AT5G51940.1	3e-71	NRPB6A, NRPD6A, NRPE6A	RNA polymerase Rpb6			DNA-directed RNA polymerases II, IV and V subunit 6A
LOC18766098	PRUPE_3G137000	ATGGCCCTAGAGCAGCACTTTCCAGAGGCTATGGTTCAAAATGACTCCATTGGACAAGATAAATGTTCCTTTGAAAAGTGGAACTCTGTTTCTGATGAAGTCACAGACTCTGAAAACAAATCCTGTGGTAATTTCGACTGCAGCATATGCTTGGACTCTGTGCACGAACCAGTAGTCACCCTCTGCGGTCACCTCTTCTGCTGGCCTTGCATATACAAGTGGCTTCAGTTCCAGAGCCCGCCCTCTGAATACCAGGATGAGCAAAAACAGCCGCAGTGCCCTGTATGCAAAGCTGAAGTCAATGAATCTTCTCTAGTCCCACTCTACGGTCGGGGCCAAACGACAAAGCCTACAAAGCCCTCCAAAGGCAAGGCTTCCCATCTTGGTATAGTCATTCCG…	MALEQHFPEAMVQNDSIGQDKCSFEKWNSVSDEVTDSENKSCGNFDCSICLDSVHEPVVTLCGHLFCWPCIYKWLQFQSPPSEYQDEQKQPQCPVCKAEVNESSLVPLYGRGQTTKPTKPSKGKASHLGIVIPRRPFRPCGVDTPRTAGTPTSPYVTQQLHHRSSPYSSQLNTPQQGSNTALPMQSPGSTTTINPVIGMFGEMVYARVFGNSMTNLYTYSNSYNLAGSGSPRVRRHVMQADKSLSRICFFLFCCFMLCLLLF	204.788	AT4G03510.2	3e-65	RMA1, ATRMA1	RING membrane-anchor 1			E3 ubiquitin-protein ligase RMA1H1
LOC18766147	PRUPE_I005800	GAGCACAAAACTGAGCTCAAAGAAAAATTCCAGCGCATGTGTGACAAATCTATGATCAAGAAGCGTTACATGTACTTGACTGAAGAAATTCTAAAAGAGAACCCAAGTATGTGTGAGTACATGGCACCTTCCCTTGACGCCCGGCAGGACATGGTGGTTGTTGAAATTCCAAAACTCGGCAAAGAAGCTGCCACCAAGGCCATTAAGGAATGGGGCCAGCCCAAATCCAAAATTACCCATTTGGTCTTTTGCACCACCAGTGGTGTGGACATGCCTGGGGCGGACTACCAGCTCACCAAGCTCTTGGGCCTACGCTCATCCGTCAAGCGCCTCATGATGTACCAACAAGGATGTTTTGCCGGCGGCACGGTGCTCCGGTTGGCCAAGGACTTGGCCGAG…	MVTVEEVRKAQRAEGPATVLAIGTATPPNCVDQATYPDYYFRITNSEHKTELKEKFQRMCDKSMIKKRYMYLTEEILKENPSMCEYMAPSLDARQDMVVVEIPKLGKEAATKAIKEWGQPKSKITHLVFCTTSGVDMPGADYQLTKLLGLRSSVKRLMMYQQGCFAGGTVLRLAKDLAENNRGARVLVVCSEITAVTFRGPSDTHLDSLVGQALFGDGAAAIIVGSDPIPEIEKPLFEVVSAAQTILPDSDGAIDGHLREVGLTFHLLKDVPGLISKNIEKSLNEAFQPLGISDWNSLFWIAHPGGPAILDQVESKLALKPEKLEATRHILSEYGNMSSACVLFILDEVRKRATKKGLKTTGDGLDWGVLFGFGPGLTVETVVLHSVGLNA	379.439	AT5G13930.1	0	CHS, TT4, ATCHS	Chalcone and stilbene synthase family protein			chalcone synthase 2
LOC18766157	PRUPE_8G070100	ATGTCGACAAATAATGGAGAGGCGGACGTAGAAGGGAGCGGACGGCGAACATCTCCAACTTCGAGTAACACCAGACTGAGAATGAGAGCCGACCCTTTCTTGGTGTGTTGCAGATGCTTCAGCGTCGTCACTGCTCTCACTGCCGTTCTCTGCATCGTCGTCAATGTCTTCTCTGCCATTGAATCTTTCAAGGATGGATCTGATGTTTTCGACGGGATATTTCGTTGTTATGCTGTTTTGATTGCGATTGTGGTGGTTGTGGCCGAGACCGAATGGGCTTTCTTTATCAAGTTCTGGAAGGTATTGGAGTATTGGGTTGGTAGGGGTATGCTGCAGGTCTTTGTTGCGGTCATGACAAGAGCATTTCCTGATGAGACTGGTACAAGGAAGGAGCTTGTT…	MSTNNGEADVEGSGRRTSPTSSNTRLRMRADPFLVCCRCFSVVTALTAVLCIVVNVFSAIESFKDGSDVFDGIFRCYAVLIAIVVVVAETEWAFFIKFWKVLEYWVGRGMLQVFVAVMTRAFPDETGTRKELVLLQNIASYMLLACGGVYIISGILCIGFLKRARQKTEISREQAIKDLEDLERRREELEHLLIVERD	209.571	AT4G33625.1	1e-85		FUNCTIONS IN: molecular_function unknown; INVOLVED IN: biological_process unknown; LOCATED IN: plasma membrane, vacuole; EXPRESSED IN: cultured cell; CONTAINS InterPro DOMAIN/s: Golgi apparatus membrane protein TVP15 (InterPro:IPR013714); Has 59 Blast hits to 59 proteins in 18 species: Archae - 0; Bacteria - 0; Metazoa - 0; Fungi - 0; Plants - 50; Viruses - 0; Other Eukaryotes - 9 (source: NCBI B…			uncharacterized
LOC18766193	PRUPE_8G176100	ATGGGTTGCTGTGAATCAAAGGTTACAGAGAAGCAACCAGAGAAGCTCCAAACCCAAGCACATGCCAACAACAGCCGGACTCCGACCCACCACCCGAACCCATCTCCCGGATCCGACCCGGAAACCGGCGGAGCTCCACCCTTCTCTGAATTCTCCTTCTCGGACCTCAAAGCAGCCACCAACAACTTCAGCTCCGACTACATAGTCTCAGAGAGCGGTGAGAAAGCCCCTAACCTTGTCTACAAAGGGCGGCTGCAGAACCGCCGTTGGATCGCCGTCAAGAAGTTCACCAAGATGGCTTGGCCTGATCCCAAGCAGTTTGCGGAGGAAGCTTGGGGTGTTGGGAAGCTGAGGCATCGGAGGCTTGCGAATTTAATTGGGTATTGCTGTGATGGTGAT…	MGCCESKVTEKQPEKLQTQAHANNSRTPTHHPNPSPGSDPETGGAPPFSEFSFSDLKAATNNFSSDYIVSESGEKAPNLVYKGRLQNRRWIAVKKFTKMAWPDPKQFAEEAWGVGKLRHRRLANLIGYCCDGDERLLVAEYMPTDTLAKHLFHWENQTIEWAMRLRVGLYIAEALDYCSTEGRPLYHDLNAYRVLFDEDGDPRLSCFGLMRNSRDGKSYSTNLAYTPPEYLRNGRVTPESVIYSFGTVLLDLLSGKHIPPSHALDMIRGKNIILLMDSHLEGKFSTEEATVVVNLASQCLQYEPRERPNTKDLVATLAPLQTKPEVPSYVMLGIPKHEEAPATPQRPLSAMGEACSRMDLTAIHQILVMTHYRDDEGTNELSFQEWTQQMRDMLEARKR…	341.696	AT4G35230.1	0	BSK1	BR-signaling kinase 1	Kinase		probable serine/threonine-protein kinase At4g35230
LOC18766210	PRUPE_8G134300	ATGGCCACGTCAGCACCCCACGCCCTACGCACCCCATTTCTCCGAAACCCCACCCTCTCTCTCTCCTCCAAGCCTACTCTGTCCTCCGTTTTCCCCGTCTCTCTCTCCTCGCGCCGCCGGGCCGCACCGCGGCTCGTGGTGGTGCTCTCCGCTGCCGGGCTCGACGCCAAGCCCACCGTTCTAGTCGCCGAGAAGCTCGGCGAGGCCGGGCTCGACCTCCTCAAGGAATTCGCCAATGTCGACTGCTCCTACAACCTCAGCCCCGAAGAGCTCTGCACCAAGATCTCGCTTTGTGACGCGTTGATCGTGCGGAGCGGGACCAAGGTCAGCCGCGAGGTGTTCGAGTCTTCCGGCGGCAGGTTGAAGGTCGTCGGTAGGGCCGGCGTCGGCATCGACAAC…	MATSAPHALRTPFLRNPTLSLSSKPTLSSVFPVSLSSRRRAAPRLVVVLSAAGLDAKPTVLVAEKLGEAGLDLLKEFANVDCSYNLSPEELCTKISLCDALIVRSGTKVSREVFESSGGRLKVVGRAGVGIDNVDLGAATEFGCLVVNAPTANTVAAAEHGIALLTAMARNVAQADASVKAGKWQRNKYVGVSLVGKTLAVMGFGKVGSEVARRAKGLGMHVIAHDPYAPADRARAIGVELVSFDEALASADFISLHMPLTPATSKVLNDETFAKMKKGVRIVNVARGGVIDEDALVRALDGGIVAQAALDVFTVEPPPQGNTLVLHERVTATPHLGASTMEAQEGVAVEIAEAVVGALKGELAATAVNAPMVPAEVLTELKPYVVLAEKLGRLAVQLV…	384.51	AT4G34200.1	0	EDA9	D-3-phosphoglycerate dehydrogenase			D-3-phosphoglycerate dehydrogenase 1, chloroplastic
LOC18766217	PRUPE_8G180600	ATGAGTGGAGCTGTGCTTGTGGCTGTTGTTGCTGCTATTGGTAATTTATTGCAAGGATGGGACAACGCTACTATCGCAGCGTCTGTTTTGTACATAAAGAAGGAATTCAAATTAGAAAGTGAGCCCGCTGTGGAAGGGCTGATAGTGGCCATGTCACTTATAGGGGCAACTTTGATTACAACATGCTCTGGAGCCATAGCAGACTGGCTAGGCCGCCGTCCTGTGCTTATAATCTCTTCTGTCCTATACTTCTTTAGTGGTATTGTAATGCTGTGGGCTCCCAATGTTTATATCCTTCTCTTGGCAAGGCTTTTAGATGGATTTGGAATTGGTTTGGTAGTTACCTTGGTTCCGCTTTATATATCTGAGACAGCACCACCTGAAATAAGGGGATCGTTG…	MSGAVLVAVVAAIGNLLQGWDNATIAASVLYIKKEFKLESEPAVEGLIVAMSLIGATLITTCSGAIADWLGRRPVLIISSVLYFFSGIVMLWAPNVYILLLARLLDGFGIGLVVTLVPLYISETAPPEIRGSLNTLPQFTGSGGMFLSYCMVFGMSLTKSPSWRLMLGVLSIPSLVYFALTVFFLPESPRWLVSKGRMLEAKHVLQRLRGREDVSGEMALLVEGLGVGGETSFEEYIIGPADDIADDHDLSAEKDKIKLYGPERGQSWVARPVTDQSTIGLVSRHASMVNQSGLVDPLVSLFGSVHEKLPDTGSMRSMLFPHFGSMFSVGGNQARQEEWDEESLAREGDDYASDAVGGDSDDNLHSPLISRQTTSLEKDLGPPPHGSLASMRNNSLIGG…	240.187	AT4G35300.4	0	TMT2	tonoplast monosaccharide transporter2			monosaccharide-sensing protein 2
LOC18766240	PRUPE_8G071500	ATGGCTCGCCGATCAGGAGGTCGTTCTGCCCGTCCAGCTCCAGCTCCTCGTCATGCACCAGCACGCAACCCTCCTCAGACAGTCAAACAAGCTCCTCCTCCGGCTCCAGTTCAGGGTGGAGGTGGTGGAATTCTCTCAGGAATTGGATCAACCATAGTTCAAGGTATTGGTTTTGGGACTGGAAGTGCTGTGGCACACAGGGCCGTTGATGCTGTGATGGGTCCTCGCACTATTCAACATGAAACTGTAGTCTCTGAGGCTGCTGCTGCTGCTCCAGCACCCATTTCTAGCAGCATGAGTGGTTCTGATGCCTGCAGTAATCACTCCAAGGCCTTCCAAGATTGTGTCAACCACTTTGGAAGTGATATCAGCAAGTGCCAGTTCTACATGGATATGCTG…	MARRSGGRSARPAPAPRHAPARNPPQTVKQAPPPAPVQGGGGGILSGIGSTIVQGIGFGTGSAVAHRAVDAVMGPRTIQHETVVSEAAAAAPAPISSSMSGSDACSNHSKAFQDCVNHFGSDISKCQFYMDMLSECKKNSASGMLSA	556.482	AT5G09570.1	4e-49		Cox19-like CHCH family protein			uncharacterized protein C6C3.02c
LOC18766290	PRUPE_8G210000	ATGGCTATGGCTAGCTGTGGCATGGCATCAGCTGCCTCAGGCTTTGTTGTGGCACCAAATGTTGCAGCAGCCAACAACACAGGCTCTGCTTCCAGCAGAAGTAGCATGTTGTTTTTCTCTTCAAAGCCCAACACCAACACCAGAAACAATGCCAGGTTTGTGATCAGGGCAGCTGATGAAGCAGCTGCTGCCCCACCAGCAGCCACCAAGGAAGCACCAGAAGGGGCAGCTGCTCCTAAACCTAAGCCACCTCCAATTGGACCCAAGAGAGGCACCAAGGTGAAGATTCTTAGGAGGGAGTCCTACTGGTTCAAAGGCATTGGATCTGTTGTAGCTGTGGATCAGGACCCCAACACCCGTTACCCAGTCGTCGTTCGATTCAACAAAGTTAACTATGCC…	MAMASCGMASAASGFVVAPNVAAANNTGSASSRSSMLFFSSKPNTNTRNNARFVIRAADEAAAAPPAATKEAPEGAAAPKPKPPPIGPKRGTKVKILRRESYWFKGIGSVVAVDQDPNTRYPVVVRFNKVNYANVSTNNYALDEIEEVK	922.192	AT2G20260.1	1e-40	PSAE-2	photosystem I subunit E-2			photosystem I reaction center subunit IV B, chloroplastic
LOC18766371	PRUPE_8G179300	ATGACACTCCCCAAAAATATCATCTCCCTCTTCCTCCTCCTCGTCCTCGCACGTGACAGCGGATTCGCACGTGCCAATGCCAGTCCTTCAGTTCAGTCTCTGAACACTCACGAGCTCATCAACCCGAAGCTGCCGCCTCGCGCCATCTCCTCCTCCAAGAAGTTCGAAGGCTCGTCCGACCTCGTCCACCTCCGCTACCACATGGGTCCCGTCCTCTCCTCCTCCCCCATCAACATCTACCTCATCTGGTACGGCAAGTGGGCCCCATCCCAGAAGCTCCTCATCACCGACTTCATCCACTCCATCTCCGCCGACGCTCACTCCGCCGCCGCCCCCTCCGTCGCCGAGTGGTGGCGCACCGTCTCCCTCTACACCGATCAGACCGGCGCCAACGTCTCC…	MTLPKNIISLFLLLVLARDSGFARANASPSVQSLNTHELINPKLPPRAISSSKKFEGSSDLVHLRYHMGPVLSSSPINIYLIWYGKWAPSQKLLITDFIHSISADAHSAAAPSVAEWWRTVSLYTDQTGANVSRNVVIAGQYSDLRYSHGTHLTRLSVQQVIATAVRSAPFPVDHKHGVYLILTSEDVTVQDFCRAVCGFHYFTFPSMVGYTLPYAWIGNSGKQCPEVCAYPFALPGYMGGGGPGSLSPPNRDVGVDGMISVIGHELAELASNPLINAWYAGEDPTAPTEIGDLCEGLYGTGGGGGYIGQVMRDREGRTFNVNGSKGRKFLLQWIWSPVLKACAGPNALD	229.328	AT2G17230.1	2e-180	EXL5	EXORDIUM like 5			protein EXORDIUM-like 5
LOC18766377	PRUPE_8G140900	ATGGCTCCTCTCTCCATAGTATCTTCCTTTCTCACCTTCCTGTTATGTATTTCTCCTGCCTTCTCCACAAACTCTGAAGGAAATGCTTTGCATGCTTTGAGAAGCAGACTCAATGATGCCACCAATGTCCTGCAGAGCTGGGACCCAACTCTGGTCAATCCCTGCACTTGGTTCCACGTTACCTGTGATTCTAATAACCATGTGATCCGTTTGGATTTGGGCAACTCTAACATTTCGGGGAGTTTGGGGCCTGAGCTTGGGGAGCTGAAGCACCTACAGTACTTGGAGCTTTATAGAAATGACATAAGTGGCAAAATCCCAAACGAGTTGGGGAAATTGAAAAGCCTTGTTAGCATGGATTTGTATGACAACAGATTTGAAGGAAAAATCCCCAAATCT…	MAPLSIVSSFLTFLLCISPAFSTNSEGNALHALRSRLNDATNVLQSWDPTLVNPCTWFHVTCDSNNHVIRLDLGNSNISGSLGPELGELKHLQYLELYRNDISGKIPNELGKLKSLVSMDLYDNRFEGKIPKSFSKLKSLRFLRLNNNKLTGSIPRELVSLSSLKVFDVSNNDLCGTIPVDGPFGTFSMESFENNRLNGPELKGLVPYDFGC	281.614	AT3G43740.1	4e-94		Leucine-rich repeat (LRR) family protein			LRR receptor kinase BAK1
LOC18766514	PRUPE_8G034100	ATGTCTGAGGAGAAGCACCACCACGGCCTCTTCCACCACCACAAGGATGAAGACAGACCCATTGAAACCTCAGACTACCCTCAGTCTGGTGGTTACTCTGATGAAGGACGTACAGGCAGCGGCTACGGTGGTGGTGGTGGCTACGGCGATGGTGGTGGCGGCTACGGGGACAACACTGCTTATTCTGGTGAAGGACGTCCCGGCAGCGGCTACGGTGGTGGTGGCGGCTATGGAGAGAGCGCTGATTACTCAGATGGCGGCCGTTACAAGGAGACCGCTGCATATGGCACCACTGGCACCCATGAATCTGAAATTGACTACAAGAAGGAGGAGAAGCACCACAAGCATCTTGAGCACCTAAGCGAGGCCGGGGCTGCTGCTGCTGGTGTTTTTGCCCTG…	MSEEKHHHGLFHHHKDEDRPIETSDYPQSGGYSDEGRTGSGYGGGGGYGDGGGGYGDNTAYSGEGRPGSGYGGGGGYGESADYSDGGRYKETAAYGTTGTHESEIDYKKEEKHHKHLEHLSEAGAAAAGVFALHEKHESKKDPEHAHRHKIEEEIAAAAAVGSGGFAFHEHHEKKEAKEEEEESHGKKHHHLF	7781.9							glycine-rich protein 2
LOC18766521	PRUPE_8G064700	ATGGCTACCCCATCCCCACGCGAAGAGAACGTATACGTGGCCAAGCTGGCCGAGCAAGCGGAGCGCTACGAGGAGATGGTGGAGTTCATGGAGAAGGTCGTCTCCTCCGTCCCCGAAGGCGAAGAACCCACAGTCGAAGAGCGCAACCTCCTCTCCGTCGCCTATAAGAACGTGATCGGCGCTCGCCGTGCCTCGTGGCGCATCGTGTCGTCGATCGAGCAGAAGGAGGAGAGCCGCGGCAACAGCGATCACGTGGCCACCATCAAGGACTACAGGGCACGGATCGAGAACGAGCTCTCTAACATCTGCGGTGGGATTCTCAAGCTTCTTGACTCCAAGCTCGTGCCGTCGGCCAACGTCGGCGATTCCAAGGTGTTTTATCTGAAGATGAAGGGAGAT…	MATPSPREENVYVAKLAEQAERYEEMVEFMEKVVSSVPEGEEPTVEERNLLSVAYKNVIGARRASWRIVSSIEQKEESRGNSDHVATIKDYRARIENELSNICGGILKLLDSKLVPSANVGDSKVFYLKMKGDYHRYLAEFKTGNERKEAAENTLNAYKAAQDIANSELAPTHPIRLGLALNFSVFYYEILNSPDRACNLAKQAFDEAIAELDTLGEDSYKDSTLIMQLLRDNLTLWTSDMQDDGADEIKEAAPKPQAEQQQ	313.521	AT1G78300.1	2e-161	GRF2, 14-3-3OMEGA, GF14 OMEGA	general regulatory factor 2			14-3-3-like protein 16R
LOC18766586	PRUPE_8G184200	ATGGCTTCTGCGCAAAAGGATTTGCCTGCGGCTGGTGAAAAGCCAGTTTCAACAGAGAACAAAAGCTCCAAATCTGAAACAGAGGTCAAAAGTCCTAAGTCTGAAACTTCCTCTGGAGATTCACAGTCAGGACAAACAAGAGCCGCCCCTTTCCAACTTCCAGAAGCCGGATTTGCTGCTCCCAATCCTTTTGATTTCTCTGCCATGACTGGCTTGCTGAATGATCCAAGCATTAAGGAACTAGCTGAACAGATAGCAAAAGATCCTTCATTCAACCAGATGGCAGACCAACTTCAGAAAACTTTTCAAGGTGCAACAATTGATGAGGGTGTCCCTCAGTTTGATAGCCAACAATATTATTCCACCATGCAACAGGTTATGCAGAATCCTCAATTCATG…	MASAQKDLPAAGEKPVSTENKSSKSETEVKSPKSETSSGDSQSGQTRAAPFQLPEAGFAAPNPFDFSAMTGLLNDPSIKELAEQIAKDPSFNQMADQLQKTFQGATIDEGVPQFDSQQYYSTMQQVMQNPQFMTMAERLGNALMQDPSMNTMLESFANPTNKDQLEERMSRIKEDPSLKPILEEIETGGPAAMMRYWNDKEVLQKLGEAMGLAVPGDAATSADNSGPEEVEDAGNEDESIVHHTASVGDVEGLKSALASGADKDEEDSEGRTALHFACGYGEVKCAQVLLEAGARVDALDKNKNTALHYAAGYGRKECVALLLENGAAVTLQNMDGKTPIDVAKLNSQNDVLKLLEKDAFL	268.602	AT2G17390.1	2e-150	AKR2B	ankyrin repeat-containing 2B			ankyrin repeat domain-containing protein 2A
LOC18766607	PRUPE_8G160800	ATGGAGACCAAGGCGATTAGGGTTTTTCTCTTCGCTCTCCTCCTCATCGCAGCGCCTTTCCTCCAAGTCGCCAGGGGTCAGTCTGATTCGGAAGTGGATACTTCTGAAACCGTAGAAGAAAGCAGTGATCTTGGGATTGTTGGTGAGGATGTCCAAGATTTTGGAGATGGAAATTTTAGCCCAGCTCCCGGTGTTGATACGATCTGTGTCTTCCCCAAAAACAGCGCTAAATCGGTGAATGCAGGGGAAGAGACTGAACTACTGGTTGGACTGAAAAATGATGGGGAGTCAAGCTTGAATGTGATTGCAATCAAAGCCAGTGTCCATCTCCCTTTTGATCACAATCTACTGGTTCAGAATCTTACTGCACAGACTTTTAACAATGGGTCAGTTCCAGCT…	METKAIRVFLFALLLIAAPFLQVARGQSDSEVDTSETVEESSDLGIVGEDVQDFGDGNFSPAPGVDTICVFPKNSAKSVNAGEETELLVGLKNDGESSLNVIAIKASVHLPFDHNLLVQNLTAQTFNNGSVPASAQATFPYIFAVSKFLQPGTFDLVGTVYYEIDQQPYQSTFYNGTIEVVEAGAFLSIESVFLVTLGFALLVLLGLWIHGQIQHLSKKTKRAPKVEVGTRATDASMDEWLQGTAYTQSLNKSSKKKK	407.519	AT2G16595.1	2e-91		Translocon-associated protein (TRAP), alpha subunit			translocon-associated protein subunit alpha
LOC18766627	PRUPE_8G059700	ATGGCACCTCCGCGAGGCCGTGGTGGTAGTGGTGGTGGATTCAGGGGCAGAGGTGATGGAGGGAGAGGTGGAAGAGGAGGAGGCAGGTTTGGTGGTGGAAGAGGCGGTGACAGAGGTGGTAGTGCCTTTAAAAGCCGTGGCGGAGGCCGTGGTGGTGATCGTGGAGGCCGTGGAGGAAGGGGCCGTGGTGGAGGAATGAAGGGTGGAAACAAAGTTGTGGTCGAGCCTCACAGACATGAAGGGGTTTTCATTGCCAAGGGTAAAGAAGATGCTCTTGTTACCAAGAATATGGTGCCCGGGGAAGCTGTATACAATGAGAAGAGGATATCTGTTCAGAATGAGGATGGAACAAAAGTTGAATATAGAATTTGGAACCCTTTCCGTTCTAAGTTGGCTGCA…	MAPPRGRGGSGGGFRGRGDGGRGGRGGGRFGGGRGGDRGGSAFKSRGGGRGGDRGGRGGRGRGGGMKGGNKVVVEPHRHEGVFIAKGKEDALVTKNMVPGEAVYNEKRISVQNEDGTKVEYRIWNPFRSKLAAAILGGVDDIWIKPGARVLYLGAASGTTVSHVSDIVGPTGVVYAVEFSHRSGRDLVNMAKKRTNVIPIIEDARHPAKYRMLVGMVDVIFSDVAQPDQARIVALNASYFLKAGGHFVISIKANCIDSTSPAEAVFQQEVKRLQADQFKPMEQVTLEPFERDHACVVGGYRVPKKSKTAA	262.909	AT4G25630.1	6e-166	FIB2, ATFIB2	fibrillarin 2			probable mediator of RNA polymerase II transcription subunit 36b
LOC18766653	PRUPE_8G142500	ATGAGCACTCCATCACTCTCAGTGGGCGCGGGTGCATTCTCTGGGTTCACTCGGCTATGCAAGGGCTTAGCGGTGGTGCTTATTGGAGGACACATTGTGGTTCAGTTTCTCCCTCAGGCCGTTAATTATCTAGCGCTCATTCCCGCCAGGACTATTCCTTTTGTCTGGAACCTCCTAACAGCCGGTTACATTGAGCAATCAGTATATGGGGTTGTTGTTAGCACTCTTGGTCTTCTTTTTATTGGGAAGCTGCTTGAACCTGTGTGGGGTTCTAGGGAGTTCTTGAAGTTCATCTTTGTAGTTAACTTCCTAACTTCCATATGCACTTTCATCACTGCTATTGCGTTGTACTACATTACGATGAACGAAAATTACCTCTATCTGCCTCTTTCTGGCTTC…	MSTPSLSVGAGAFSGFTRLCKGLAVVLIGGHIVVQFLPQAVNYLALIPARTIPFVWNLLTAGYIEQSVYGVVVSTLGLLFIGKLLEPVWGSREFLKFIFVVNFLTSICTFITAIALYYITMNENYLYLPLSGFYGVLSGFLVGIKQIIPDQELPLLKIKSKWLPSLSILLSIAISFWTAQSATYLPILIFGTYISWVYLRYWQRKPETKLKGDPSDDFAFSTFFPEFLRPVIDPVASIFHRMLCGRFEASSESQGYTLGGTTLPGSDPIEASRRRERGARALEERLAAERLGAAQGTEESGRDATESV	366.906	AT3G07950.1	5e-148		rhomboid protein-related			rhomboid-like protein 19
LOC18766701	PRUPE_8G260800	ATGGCATCGGGTTGGGGAATCACAGGGAACAAAGGGCGCTGCTACGATTTCTGGGTCGACTTCAGCGAGTGCATGTCTCGCTGCCGTCAGCCCAAGGACTGTGTTCTTCTTCGCGAAGACTACCTCGAGTGTCTTCACCACTCCAAAGAGTTTCAACGAAGAAACCGAATTTACAAGGAGGAGCAGCGTAAAATAAGGGCAGCTGCACGGGCCAAAGAGGGTGGAGAGGTTGATAAGCATCACCATCCATAG	MASGWGITGNKGRCYDFWVDFSECMSRCRQPKDCVLLREDYLECLHHSKEFQRRNRIYKEEQRKIRAAARAKEGGEVDKHHHP	275.395	AT3G62790.1	2e-45		NADH-ubiquinone oxidoreductase-related			NADH dehydrogenase [ubiquinone] iron-sulfur protein 5-B
LOC18766743	PRUPE_8G095600	ATGTCATTGGAGGTGGTGAAGGAAGACGAAGAAGTTTACAGCTGGCGAGAAGTGAAGCTGGCGTCGATCGCAGAGCTTGAGAGGGAGACGGCGGAGAGAAGGCGTGGCCGTGACATAGTCATCGCTGTGGATCATGGGCCCAACAGCAAGCACGCTTTCGATTGGGCCCTTATTCACTTTTGCAGGCTTGCTGATACCATCCATCTTATTCATGCTGTTTCCAGTGTGACCAACGAGATTGTTTACGATGCAAGCCAGGTCCTGATGCAGAAGCTTGCAATTGAGGCATTTGAAGTTGCCATGGTGAGGACGATTGCACGAATTGTGCAAGGAGATCCAGGTAAGGTAATTTGCAAGGAAGCAGAGCGTGTAAAGCCTGCAGCTGTTATCCTGGGTACC…	MSLEVVKEDEEVYSWREVKLASIAELERETAERRRGRDIVIAVDHGPNSKHAFDWALIHFCRLADTIHLIHAVSSVTNEIVYDASQVLMQKLAIEAFEVAMVRTIARIVQGDPGKVICKEAERVKPAAVILGTRGRGFIQSVLQGSVSEYCMHNCKSAPVVIVPGKEAGDESLI	635.22	AT2G21620.1	6e-85	RD2	Adenine nucleotide alpha hydrolases-like superfamily protein			universal stress protein PHOS32
LOC18766767	PRUPE_8G049100	ATGACCAATCCAGTTCAGGATTTTCATGAAGAAGAAGAAGATGACCAGGGCGAGGTTTATCTTGATGAAGCTGACATTATTGGCGAAGTCGATGTTGATGATGAAGATCTTCCTGATGCAGATGATGAAATTATTGATGAGCCTGATGACTCCATGCACATATTCACTGGTCATACTGGTGAGCTTTACACGGTTGTCTGCAGCCCAACAGATCCTACATTAGTTGCAACTGGGGGTGGAGATGACAGAGGGTTTCTTTGGAAAATTGGACAAGGAGATTGGGCGTTTGAGCTCCAAGGTCATAAGGATTCTGTTTCTAGTTTAGCATTTAGTACTGATGGACAATTGCTTGCATCCGGAAGCTTGGATGGAATTATTCAAATTTGGGATATCACATCA…	MTNPVQDFHEEEEDDQGEVYLDEADIIGEVDVDDEDLPDADDEIIDEPDDSMHIFTGHTGELYTVVCSPTDPTLVATGGGDDRGFLWKIGQGDWAFELQGHKDSVSSLAFSTDGQLLASGSLDGIIQIWDITSQNLKCTLEGPGGGIEWVRWHPRGHLVLAGTEDSIVWMWNADKGSYLNSFSGHGGSVSCGDFTPDGKTICTGSADATLRIWNPKSGENIHVVQGHPYHTAGLTCLAISSDSTLAVTGCEDGSIHVVNIVTGKVVSSLPSHSDSVECIELAPSFPWAAIGSMDNKLIIWDLQHSLARSTCDHEDGVTCLTWLGGSRYLATGCGDGKVRLWDSLSGDCVRIFNGHSESIQSLSVSANQEFLVSVSTDGTARVFEIAEYK	296.538	AT1G71840.1	0		transducin family protein / WD-40 repeat family protein			angio-associated migratory cell protein
LOC18766778	PRUPE_8G223500	ATGTTGAGGCCTTCTCAACTGAGTCAACTCGTTCTTCTTCTTCTTCTTATTGCTTGCTCTGTACCCTCAACAACAGCCAAAACCCAAAGGCCAGGCTTTCTCTTCACAAGAACCACAGGAAGATGCACTCCACACTATTGGGGGAGCAGGAGGGAGGCTTGGCCGAGGATGGTCCCACAGACATCAACGGTGTCGAAGGTGTTCGGATCAAGAGCCTACGAACGGTACAGATCTGATCTGACGCTACTGGAAGCGACGGTCAGGAACGACGAGGAGAACGTCTACCCTAGGCTGCTGAAGCAGGCGAGCGCCGCCCTCCTGAACTCTTACGCCAGGAAGGGGTTTCCGTACAGTGCTTGGGAGGTGAAGACTTTGGTCATTCAAGCTCTGGTGTCGGAT…	MLRPSQLSQLVLLLLLIACSVPSTTAKTQRPGFLFTRTTGRCTPHYWGSRREAWPRMVPQTSTVSKVFGSRAYERYRSDLTLLEATVRNDEENVYPRLLKQASAALLNSYARKGFPYSAWEVKTLVIQALVSDKAAALQAQRFSVANEACH	448.037	AT2G20515.1	6e-56		unknown protein; FUNCTIONS IN: molecular_function unknown; INVOLVED IN: biological_process unknown; LOCATED IN: endomembrane system; EXPRESSED IN: 16 plant structures; EXPRESSED DURING: 7 growth stages; Has 71 Blast hits to 71 proteins in 14 species: Archae - 0; Bacteria - 0; Metazoa - 0; Fungi - 0; Plants - 71; Viruses - 0; Other Eukaryotes - 0 (source: NCBI BLink).			uncharacterized
LOC18766797	PRUPE_8G231600	ATGAAACTGCAACTTCTGTCATACAAATCAGTTCCATTGCAGATTGCCCATAAGCTTCTGAAGTTTCCCACCAATTCTCTTTCAAAGCTGAAGATAATGGCAACCATTACTGCTAGCACTCCAACCTCATCAATCACCAGGGCAAGTCTGGTGCACAAGCCATCTGTTGGGGCTCCATCCGCAACTGTGTTGGCTTTGCCATCACTTGCAAGGAAGGGGAAAGTGGGTTGTTCCATGGAGGGAAAGAAGGAGAGCAGCAACTCAAAGATGGGCAAGGGTGCATCTTTGGCTGCAGCAGCTATGGCTGCAACCATGTCAAGCCCAGCCATGGCTTTGGTGGATGACAGATTGAGCACAGAAGGAACAGGGCTTCCCTTTGGCTTGAGCAACAACATTCTT…	MKLQLLSYKSVPLQIAHKLLKFPTNSLSKLKIMATITASTPTSSITRASLVHKPSVGAPSATVLALPSLARKGKVGCSMEGKKESSNSKMGKGASLAAAAMAATMSSPAMALVDDRLSTEGTGLPFGLSNNILGWILFGVFGLIWTFYFIYTSSLEEDEESGLSL	692.29	AT2G30570.1	7e-49	PSBW	photosystem II reaction center W			photosystem II reaction center W protein, chloroplastic
LOC18766839	PRUPE_8G080300	ATGGGTTTCCGGTTGCCTGCAATTGTTAATGCAAAGAGAAGTCTCATTCGATCTCTATCTAGTTCAAGCCAGACAGCAGATTCAAAGACTTTAGATATCCCAAAAGGCTACCTTGCAGTCTATGTTGGGGAGAGCCAGAAGAAGCGGTTTGTGATTCCGATATCATATTTGAATGAGCCTTTATTCCTGGATTTGCTGAGTCAAGCTGAAGAAGAATTCGGATATGATCATCCCATGGGAGGTATCACAATCCCCTGCAGTGAAAACACCTTCCTTGATCTCACTTCCCGCTTGAGTGTGTGA	MGFRLPAIVNAKRSLIRSLSSSSQTADSKTLDIPKGYLAVYVGESQKKRFVIPISYLNEPLFLDLLSQAEEEFGYDHPMGGITIPCSENTFLDLTSRLSV	524.432	AT4G38840.1	3e-37		SAUR-like auxin-responsive protein family			auxin-induced protein 15A
LOC18766842	PRUPE_8G057500	ATGGTAAACAAAGCTCCTTCTGCTTCTTTATTCTCATCAATTTTGCTTCTAATTCTCGCATTTCTCTTCGCCATGGCCGATTCTGCTCCCAAATCCGTCGCTTCTTCTTCCGAATCGGCGGTCCACATCGTCTACACCGAGAGGCCTCTCGAAAATGAGGAGCCTGAGGCCTACCACATCCGAACCCTAGCCTCCATCCTCGGCAGTGAGGAGGCTGCGAAGGGGGCTCTGATATACAGTTACAAGACGGCTGCCAGTGGATTCTCCGCTAAGCTCACTCCTCAACAGGTCGAGGAAATTTCAAAACTACCTGGGGTTCTTCAGGTTGTACCAAGTAGGACACTTCAACTGCATTCAGGACCTGGGAAGCTGCATTAA	MVNKAPSASLFSSILLLILAFLFAMADSAPKSVASSSESAVHIVYTERPLENEEPEAYHIRTLASILGSEEAAKGALIYSYKTAASGFSAKLTPQQVEEISKLPGVLQVVPSRTLQLHSGPGKLH	299.696	AT1G71950.1	3e-39		Proteinase inhibitor, propeptide			subtilisin-like protease SBT3.3
LOC18766867	PRUPE_8G233200	ATGGCGGGCAAAGGCGGGAAGGGGCTTTTGGCAGCGAAAACCACAGCAGCTAACAAGGACAAGGAGAAGGAGAAGGACAAGAAGAGGCCTGTTTCCCGTTCATCTCGTGCTGGTATCCAGTTTCCGGTGGGTCGAATTCACAGGCAGCTGAAATCCAGAATTGCAGCACATGGCCGTGTTGGAGCCAATGCTGCCGTGTACTTGGCCTCAATCCTTGAGTACCTGACAGCTGAGGTTCTCGAGTTGGCTGGAAATGCAAGCAAAGATCTCAAGGTGAAGAGAATCACACCAAGGCATCTGCAACTGGCCATTAGGGGAGATGAAGAGCTTGACACTCTCATCAAAGGAACCATTGCTGGTGGTGGTGTCATTCCCCACATTCACAAGTCCCTCATCAAC…	MAGKGGKGLLAAKTTAANKDKEKEKDKKRPVSRSSRAGIQFPVGRIHRQLKSRIAAHGRVGANAAVYLASILEYLTAEVLELAGNASKDLKVKRITPRHLQLAIRGDEELDTLIKGTIAGGGVIPHIHKSLINKTSKE	930.563	AT3G54560.1	4e-78	HTA11	histone H2A 11			histone H2A variant 1
LOC18766879	PRUPE_8G212700	ATGGCTACCCAAGGTCAAGTCATCACCTGCAAAGCGGCGGTGGCCTGGGAACCCAATAAGCCATTGGTGATCGAAGACGTACAGGTAGCTCCGCCTCAGGCCGGAGAGGTCCGGGTCAAGATTCTCTACACTGCTCTCTGCCACACCGACGCTTATACCTGGGGTGGTAAGGATCCTGAAGGTCTCTTCCCTTGCATTCTTGGTCACGAGGCTGCAGGGATTGTTGAGAGCGTTGGTGAAGGTGTTACTGAAGTTCAGCCAGGAGACCATGTCATCCCTTGTTACCAGGCAGAATGCGGAGAATGCAAGTTTTGCAAATCAGGGAAGACAAATCTCTGTGGAAAAGTACGTGCTGCCACTGGAGTTGGAGTCATGATGAGTGATCGCAAGAGCCGTTTC…	MATQGQVITCKAAVAWEPNKPLVIEDVQVAPPQAGEVRVKILYTALCHTDAYTWGGKDPEGLFPCILGHEAAGIVESVGEGVTEVQPGDHVIPCYQAECGECKFCKSGKTNLCGKVRAATGVGVMMSDRKSRFSVNGKPIYHFMGTSTFSQYTVVHDVSVAKIDPKAPLEKVCLLGCGVPTGLGAVWNTAKVESGSIVAIFGLGTVGLAVAEGAKTAGASRIIGIDIDSKKFDTAKNFGVTEFVNPKDHEKPIQQVLVDLTDGGVDYSFECIGNVSVMRAALECCHKGWGTSVIVGVAASGQEISTRPFQLVTGRVWKGTAFGGFKSRSQVPWLVEKYLKKEIKVDEYITHKLTLGEINKAFDLMHEGGCLRCVLSTDA	206.941	AT5G43940.1	0	HOT5, ADH2, GSNOR, ATGSNOR1, PAR2	GroES-like zinc-binding dehydrogenase family protein			alcohol dehydrogenase class-3
LOC18766937	PRUPE_8G234500	ATGTTTCAGGGATCGAAAGGGAAAACAATGAAATGGGGAACATTGCTTAAGGACTTAAGAGAGAAGGTCGGTCTCACTCAATCGCCGTCGTCTTCTTTTTCTGCTTCTGCCACTGCTTCTTCTTCTTCGTCGTCGGCGGCGGCTCTCTCTTCCAATAACAATGCTAATTCAGCTCTTCACGGCTCGTATTCTCCTTCAAGAGACAAACATGAATTGGAATTGGACTTCAAGAGATTTTGGGAAGAGTTCCGGTCATCCAGCTCTGAAAAGGAGAAAGAAGCGGCCTTGAATTTAACTGTAGATGTTTTTTGTAGATTAGTAAAGCAGCATGCAAATGTAACTCAATTAGTTACCATGTTAGTTGAAACACATATATTCTCATTTGTCCTTGGAAGAGCA…	MFQGSKGKTMKWGTLLKDLREKVGLTQSPSSSFSASATASSSSSSAAALSSNNNANSALHGSYSPSRDKHELELDFKRFWEEFRSSSSEKEKEAALNLTVDVFCRLVKQHANVTQLVTMLVETHIFSFVLGRAFVTDIEKLKISSRTRYLDVEKVLKFFSEVTKDDISPGSNLLTALQVLASGPIDKQSLLDSGILCCLIHILNALLNPDEANQNQKATDCEEPTLAEKKYDGDASQVRRLEVEGSVVHIMKALANHPLAAQSLIEDDSLQLLFQMVANGSLTVFSRYKEGLVLVHIIQLHRHAMQILGLLLVNDNGSTAKYIRKHHLIKVLLMAVKDFNPDCGDSTYTMGIVDLLLECVELSYRPEAGGVRLREDIHNAHGYQFLVQFALKLSSIAKS…	339.496	AT1G03060.1	0	SPI	Beige/BEACH domain ;WD domain, G-beta repeat protein			protein SPIRRIG
LOC18766945	PRUPE_8G259700	ATGAGTCGTCATCCTGAGGTGAAGTGGGCCCAAAGGGTGGACAAGGTTTTCATTACTGTGCTTTTGCCTGATGCAAAGGACGCTAAGGTTAAACTTGAACCTGATGGAGTTTTTAGTTTTTCTGCTAGTGCCGGTGCAGAGAATCACCATTATGAACTGAAACTGGATCTTTTTGATAAGGTTAATGTGGAGGAAAGCAAAATAAATGTTGGAGTGAGGAGTATCTTCTGTATCTTGGAGAAGGCAGAGAAAGTTTGGTGGAAGAAGCTTTTGCGTGGAGATGGAAAGACACCCCATTATGTCAAAGTAGATTGGGACAAATGGGTGGATGAAGACGAGGATACTGGATCAGGTCCGAGTGACTTGGATTTGGGAGGGATGGATTTCTCGAAATTTGGT…	MSRHPEVKWAQRVDKVFITVLLPDAKDAKVKLEPDGVFSFSASAGAENHHYELKLDLFDKVNVEESKINVGVRSIFCILEKAEKVWWKKLLRGDGKTPHYVKVDWDKWVDEDEDTGSGPSDLDLGGMDFSKFGGMGGDDAMGDFDDSDEDLELPKPGEQDYDKNEAEEIGDDPSEEKKEEKKEAAGTT	382.596	AT4G02450.2	4e-54		HSP20-like chaperones superfamily protein			uncharacterized protein OsI_027940
LOC18767031	PRUPE_8G271000	ATGTTTCTGTTCGACTGGTTCTACGGTGTGCTGGCCTCCCTGGGTCTCTGGCAGAAAGAGGCCAAGATCTTGTTCCTTGGCCTCGATAATGCCGGCAAGACCACCTTGCTTCACATGTTGAAAGACGAGAGACTGGTACAGCATCAGCCTACGCAGTATCCAACATCAGAGGAGTTGAGCATTGGGAAAATCAAGTTCAAGGCCTTTGATTTGGGAGGTCATCAGATTGCTCGCAGGGTCTGGAGAGATTACTATGCAAAGGTAGATGCTGTGGTGTACCTTGTGGATGCCTATGACAAGGAGCGGTTTGCTGAATCAAAAAAGGAACTTGATGCACTCCTTTCTGATGAAGCTCTTGCCAATGTCCCATTTCTAATTTTAGGGAACAAGATTGACATA…	MFLFDWFYGVLASLGLWQKEAKILFLGLDNAGKTTLLHMLKDERLVQHQPTQYPTSEELSIGKIKFKAFDLGGHQIARRVWRDYYAKVDAVVYLVDAYDKERFAESKKELDALLSDEALANVPFLILGNKIDIPYAASEEELRHHLGLTNFTTGKGKVNLTDSNVRPLEVFMCSIVRKMGYGDGFKWLSQYIK	258.747	AT4G02080.1	8e-136	ASAR1, ATSARA1C, ATSAR2, SAR2	secretion-associated RAS super family 2			GTP-binding protein SAR1A
LOC18767061	PRUPE_8G109700	ATGGCAAAACAGAGCTACTTGAAAATGATGACTGAATCAGATGCAAATGAATTGATCCACTCAGATCTCAAAGACGTTGCCACTGCTGCTAAAAAGCTTGCCAACCATGCCATCAATCTGGGCAGCGTAGGCTTTGGCACCTCTTTCCTCAAATGGGTTGCTGCTTTTGCTGCAATCTATCTGTTGATCTTGGATCGAACAAACTGGAAATCAAACATCCTTACAGGGCTCTTAATCCCCTACATTTTCTTTACCCTTCCCTCAATATTGTTCAACATCTTCAGGGGACAGATTGGACAATGGATTGCTTTAGTTGCTGTCATCTTACGGATTTTCTTTCCTAAACATTTCCCAGAGTGGCTTGAATTGCCGGCTGCGTTGATTCTCCTTATAGTCGTT…	MAKQSYLKMMTESDANELIHSDLKDVATAAKKLANHAINLGSVGFGTSFLKWVAAFAAIYLLILDRTNWKSNILTGLLIPYIFFTLPSILFNIFRGQIGQWIALVAVILRIFFPKHFPEWLELPAALILLIVVAPSLIANTVRGDWIGVVICLVIAGYLLQEHIRAAGGFRNAFTKANGVSNTVGIVILFVYPVWALVLDIL	816.138	AT3G50830.1	1e-89	COR413-PM2, ATCOR413-PM2	cold-regulated 413-plasma membrane 2			cold-regulated 413 plasma membrane protein 1
LOC18767091	PRUPE_8G161100	ATGGCTTCAAACCCTAAGGTCTTCTTCGACATGACGATCGGAGGCCAGCCTGCCGGCCGCATCGTCATGGAGCTCTTCGCCGACACCACCCCCCGCACCGCCGAGAACTTCAGGGCTCTCTGCACCGGAGAGAAGGGCGCTGGCCGCAGCGGCAAGCCCCTGCACTACAAGGGCTCCTCCTTCCACCGAGTGATCCCAGGGTTCATGTGCCAGGGAGGTGACTTCACCGCCGGAAACGGCACCGGAGGCGAGTCGATCTACGGCGCCAAGTTCGCCGATGAGAACTTCATCAAGAAGCACACCGGACCTGGAATTCTGTCCATGGCCAACGCTGGTCCCGGGACCAACGGATCTCAGTTCTTCGTCTGCACGGCCAAGACCGAGTGGCTCGACGGCAAG…	MASNPKVFFDMTIGGQPAGRIVMELFADTTPRTAENFRALCTGEKGAGRSGKPLHYKGSSFHRVIPGFMCQGGDFTAGNGTGGESIYGAKFADENFIKKHTGPGILSMANAGPGTNGSQFFVCTAKTEWLDGKHVVFGQVTEGLDVVKNIEKVGSSSGRTSRPVVVADCGQLS	1612.38	AT2G16600.1	3e-110	ROC3	rotamase CYP 3			peptidyl-prolyl cis-trans isomerase
LOC18767123	PRUPE_8G242900	ATGAAGCTCGTCAGGTTCTTGATGAAGTTGAACAACGAGACAGTGTCGATCGAGCTCAAGAACGGCACCGTTGTCAACGGCACCATTACAGGTGTGGATATCAGTATGAATACGCATTTGAAGACAGTGAAACTTACGCTGAAGGGGAAGAACCCAGTGACTCTGGATCATCTCAGCGTGAGGGGAAACAACATTCGATACTATATCCTCCCAGATAGTTTGAATCTTGAGACTCTGCTAGTTGAAGAGACACCTAGGGTCAAGCCCAAGAAGCCAACTGCAGGGAGACCCGTGGGCCGTGGACGTGGGCGCGGTCGTGGTCGGGGACGTGGGCGTGGCCGTTAA	MKLVRFLMKLNNETVSIELKNGTVVNGTITGVDISMNTHLKTVKLTLKGKNPVTLDHLSVRGNNIRYYILPDSLNLETLLVEETPRVKPKKPTAGRPVGRGRGRGRGRGRGRGR	286.684	AT4G02840.1	3e-59		Small nuclear ribonucleoprotein family protein			small nuclear ribonucleoprotein Sm D1
LOC18767142	PRUPE_8G088700	ATGGATCGCTATCTCTCTCTTCTTCTCGCATTCTCTCTCTTGATCGTCTCGCGTGCGCAATCGGACGGGGCAGATCCGCTGATCAGGCAAGTGGTCGACGGCGGCGATGATCACCAGCACGACCATCGGCTCGGAGCCGAACACCACTTCTCGCTCTTCAAGCACCAATTCGGCAAGTCGTACGCGAGCCAGGAGGAGCACGACTACAGGTTCGAAGTGTTCAAGGCGAACCTGCGCCGAGCCGCGCGACACCAGATGCTCGATCCTTCGGCTCAACACGGCGTGACTCGGTTCTCCGATATGACCCCGGCCGAGTTCCGAAAGAGTCAACTCGGACTCAGAGGGCTGAGGCTCCCTTCCGATGCCACCAAGGCTCCGATTCTCCCGACCGAGAATCTG…	MDRYLSLLLAFSLLIVSRAQSDGADPLIRQVVDGGDDHQHDHRLGAEHHFSLFKHQFGKSYASQEEHDYRFEVFKANLRRAARHQMLDPSAQHGVTRFSDMTPAEFRKSQLGLRGLRLPSDATKAPILPTENLPEDFDWRDRGAVTAVKNQGSCGSCWSFSTTGALEGAHFLATGELVSLSEQQLVDCDHECDPEEAGSCDSGCNGGLMNSAFEYTLKAGGLMKEEEYPYTGTDRGSCKFDKSKIAAKVANFSVVSLDEEQIAANLVKNGPLAVAINAVFMQTYVGGVSCPYICSKRLDHGVLLVGYGAAGYSPIRMKEKPYWIIKNSWGENWGEKGFYKICKGRNICGVDSMVSTVAAASVETNPQ	1481.59	AT4G39090.1	0	RD19, RD19A	Papain family cysteine protease			cysteine protease RD19A
LOC18767160	PRUPE_8G239100	ATGGCGGATAGCAAGGCAGTGACGATCCGTACGAGGAAGTTCATGACCAACCGTCTTCTGTCGAGGAAGCAATTCGTCATCGATGTTCTGCATCCTGGTAGACCCAATGTCTCCAAGGCAGAGTTGAAGGAGAAACTTGCAAGGTTGTACGAGGTGAAAGATACAAATGCCATCTTTGTTTTCAAGTTCCGCACCCACTTTGGAGGGGGGAAATCCACTGGTTTCGGTTTGATTTATGATTCCGTAGAGAATGCAAAGAAGTATGAGCCAAAGTACAGGCTGATCAGGAATGGACTGGATACAAAGGTGGAAAAGTCAAGGAAGCAACTCAAGGAAAGGAAGAACAGATCCAAGAAGATTCGTGGAGTCAAGAAGACCAAGGCTGGTGATGCTGCCAAG…	MADSKAVTIRTRKFMTNRLLSRKQFVIDVLHPGRPNVSKAELKEKLARLYEVKDTNAIFVFKFRTHFGGGKSTGFGLIYDSVENAKKYEPKYRLIRNGLDTKVEKSRKQLKERKNRSKKIRGVKKTKAGDAAKAGKKK	885.693	AT5G28060.1	5e-80		Ribosomal protein S24e family protein			40S ribosomal protein S24-1
LOC18767184	PRUPE_8G224300	ATGTCTTTCAGAGGGCTTAGCAGGCCAAATGCTTCGTGTGCCATGGGAGTTTCTGATGACAGCAAGAACACTTTCATGGAACTGCAGAGGAAGAAGGTTCACCGCTATGTGATATTCAAGGTTGATGAGAAGAAGAGGGAGGTTGTAGTTGAAAAGATTGGCGGCCCAGCTGAGAGCTATGATGATTTTGCGGCAGCTTTGCCTGAAAATGATTGCAGATATGCAGTTTATGACTTCGATTTTGTGACTTCTGAGAACTGTCAAAAGAGCAAGATCTTCTTCATTGCATGGTCCCCTTCAACCTCTCGAATCCGTGCAAAGATGCTGTATGCAACATCTAAAGATAGGTTTCGGCGTGAGCTGGATGGTATTCACTATGAGATTCAGGCTACTGACCCA…	MSFRGLSRPNASCAMGVSDDSKNTFMELQRKKVHRYVIFKVDEKKREVVVEKIGGPAESYDDFAAALPENDCRYAVYDFDFVTSENCQKSKIFFIAWSPSTSRIRAKMLYATSKDRFRRELDGIHYEIQATDPSEMDLEVLRDRAH	222.057	AT2G31200.1	1e-86	ADF6, ATADF6	actin depolymerizing factor 6			actin-depolymerizing factor
LOC18767253	PRUPE_8G153800	ATGGGGCTGTCCACAATTTTACTAGCCCTCGTTTGTGTTTTAGGCTCTGCCCTTCTCCAATCCACTCATGCCCAAGACGCACCGCAAGACTACCTCACTGCCCACAACATCGCTCGAGCAGCGGTTAACGTCGAGCCATTGTCATGGGATGAGAAGCTGCAAGCCTATGCGCAAGACTATGCCAATCAACACATGGGCGACTGCAATCTTGTCCACTCTGGTGGGCCCTACGGCGAAAACCTTGCCATGAGCACCGCTGACTTGTCGGGCACGGATGCCGTGAACATGTGGGTGGCGGAGAAGGCCGACTATAACTACGACTCTAACACTTGTGCCGATGACAAGGTGTGTGGGCATTATACGCAGGTTGTTTGGCGTAACACAGCTCGTGTAGGGTGT…	MGLSTILLALVCVLGSALLQSTHAQDAPQDYLTAHNIARAAVNVEPLSWDEKLQAYAQDYANQHMGDCNLVHSGGPYGENLAMSTADLSGTDAVNMWVAEKADYNYDSNTCADDKVCGHYTQVVWRNTARVGCAKVRCNSGGTFIGCNYDPPGNYVGEKPYEPYNSYAKILPCARCMDAPIIFTIGNNVE	314.907	AT2G14610.1	1e-71	PR1, PR 1, ATPR1	pathogenesis-related gene 1			pathogenesis-related protein 1
LOC18767265	PRUPE_8G188900	ATGGCGATGGCGAGCCTTCAGAGACTTCGTCACTCCCAAATCCACCACCGCCTGCCTTCTCTCTCCTTCATCTCCAGATCCTCCGCCTCATCTGCATCCCCATCCCCATCCTCGCCCACCCACTCGGCAAAAGTCTCCGATCGAATTGTGAAGCTCTTCGCGATCGACGTCGACGGGCGCAAGCGCGAGGTGGTGGGCCTATCGGGCCACACTCTGCTCCGGGCCCTAGCCCAAGGCGGCCTGATCGACCCGGCCTCCCACCGGCTCGAGGATATCGACGCCTGCTCGGCCGAATGCGAGGTCAATATCGCGCAGGAATGGTTCGAAAAGCTCCCACCACGGTCCTACGACGAAGAGTACGTGCTCAAGAGGAACTCTAGGGCTAGGGTTCTCAACAAG…	MAMASLQRLRHSQIHHRLPSLSFISRSSASSASPSPSSPTHSAKVSDRIVKLFAIDVDGRKREVVGLSGHTLLRALAQGGLIDPASHRLEDIDACSAECEVNIAQEWFEKLPPRSYDEEYVLKRNSRARVLNKHSRLGCQVVLTPELQGMVVAVPEPKPWDIP	533.711	AT3G07480.1	1e-75		2Fe-2S ferredoxin-like superfamily protein			putidaredoxin
LOC18767280	PRUPE_8G266700	ATGGCTGGTCATAAGATTGCTCATGCCACACTGAAAGGACCAAGTGTTGTCAAGGAGATCTGTTACGGCATGGTGATTGCTTTGGCTGCTGGAAGCCTTTGGAAAATGCATCACTGGAATGAGCAGAGGAAAGTGAAGGTGTTCTATGACTTGCTTGAAAAAGGTGAAATTAGTGTTGTTGCTGACGAATAG	MAGHKIAHATLKGPSVVKEICYGMVIALAAGSLWKMHHWNEQRKVKVFYDLLEKGEISVVADE	353.464	AT5G61310.4	7e-32		Cytochrome c oxidase subunit Vc family protein			probable cytochrome c oxidase subunit 5C-1
LOC18767300	PRUPE_8G082400	ATGGCGCCGCCTCCAGGACCCTATTCTGGAACCAGCACCCTCGCCTTGGTTGCTCGTGCTTCCGCATTCTCCTTTGGACTCGTATACGGAAGCATTAAGCTCAAGTATCTCAAGGCAAAGGCTAAATCTGCAGCAAAGGCTCATCACTGA	MAPPPGPYSGTSTLALVARASAFSFGLVYGSIKLKYLKAKAKSAAKAHH	301.418	AT3G01130.2	2e-15		unknown protein; FUNCTIONS IN: molecular_function unknown; INVOLVED IN: biological_process unknown; EXPRESSED IN: male gametophyte, pollen tube; EXPRESSED DURING: M germinated pollen stage; BEST Arabidopsis thaliana protein match is: unknown protein (TAIR:AT5G15320.1); Has 64 Blast hits to 64 proteins in 11 species: Archae - 0; Bacteria - 0; Metazoa - 0; Fungi - 0; Plants - 64; Viruses - 0; Other…			uncharacterized
LOC18767310	PRUPE_8G146100	ATGGATGAAAATTCAAGCGACAAGGAGTCCTTGATGGCTCGCATTCATCAGCTGGAGCAAGAGCGTGATGAATTACGCAAAGACATTGAACAGTTATGTATGCAACAAGCTGGACCAAGCTACCTTGTTGTGGCTACTAAGATGCATTTTCAAAGGACAGCTGGCTTGGAGCAGGAGATTGAAAACTTGAAAAAGAAGCTAGCTGCTTGCACTAGAGATAATGTGAATCTTCAAGAGGAGCTTTCAGAGACTTACAGAATCAAAGGCCAGTTGGCTGATCTTCATAGTGCAGAGGTGGCAAAGAATGTGGAAGCAGAGAAGCAGCTTAAGTTTTTCCAGGGCTGTGTAGCTGCAGCTTTTGCTGAACGAGATCATTCAATAATGGAGGCTGAGAAGGCT…	MDENSSDKESLMARIHQLEQERDELRKDIEQLCMQQAGPSYLVVATKMHFQRTAGLEQEIENLKKKLAACTRDNVNLQEELSETYRIKGQLADLHSAEVAKNVEAEKQLKFFQGCVAAAFAERDHSIMEAEKAREKEEFMSKKLCDIEKRLEELAADCSEQKKLNDKLQTDLAMQEEHNESFKKVIDKFYEIRRHSPEGFQDTSWDRKCACLLHDPAEWWSFNDASTSKYISALEEELERMRNSVDNLRNRLQVGLEIENHLKRRVGELEKKKIITDKMIKNEIAELHHYHSQHRVHVINLLNEGHASIKSICDAIEEKSRQIDVGRLQKVGPPPGDVKQDKNECQDVHENADAEPQLLSKNIGPVLSEFVAVGGNDASGALAQALQDKVATLLLLSQQ…	202.54	AT2G14680.3	0	MEE13	myosin heavy chain-related			probable DNA double-strand break repair Rad50 ATPase
LOC18767320	PRUPE_8G250100	ATGAGTTCGCCGACTTCCAAGGGAGGCAGAGGCAAGCCTAAAGCTTCCAAATCCGTGTCCAGGTCTCACAAGGCTGGCCTCCAATTTCCAGTTGGCCGTATCGCTCGATTCCTCAAGTCCGGCAAGTACGCCGAGCGAGTCGGTGCTGGCGCTCCGGTATATCTCTCTGCCGTTCTCGAGTATCTCGCTGCTGAGGTACTTGAGCTTGCTGGCAATGCAGCCAGAGACAACAAGAAGAATCGAATTGTTCCAAGGCATATTCAGCTGGCTGTGCGTAACGACGAGGAGTTGAGCAAGCTTTTGGGGACTGTTACTATTGCTAATGGCGGTGTTTTGCCAAACATTCATCAGACTCTGTTGCCGAAGAAGATTGGTAGAGGGAAAGGAGACATTGGATCT…	MSSPTSKGGRGKPKASKSVSRSHKAGLQFPVGRIARFLKSGKYAERVGAGAPVYLSAVLEYLAAEVLELAGNAARDNKKNRIVPRHIQLAVRNDEELSKLLGTVTIANGGVLPNIHQTLLPKKIGRGKGDIGSASQEF	390.537	AT1G08880.1	5e-87	HTA5, H2AXA, G-H2AX, GAMMA-H2AX	Histone superfamily protein			histone H2AX
LOC18767325	PRUPE_8G201600	ATGAATGTTACTGGATTGAAAAAAACCGCGGCTTCTCGAGAGTTCCGTAGATTGTTTGGTTCGCGACAGCCCGTCCTTTTAAGTCATCAGCTCTCCTCGGACGCGACGTCAAAACAAGGCTTCTTCAGTGTCTCGCTCTCTTTGAGCTCAGAGCATAGATCAGGGGTTTATTGTGTTTGTGATTTTGTTTGGCTGTTTCAGCTTCACTCGCACAATTCAATAATGTCCCGCGGAAGCCAGAGAGAGCGAGACCGTGAAAGGGCTCAGGCCAGGTCTGGCGGGAAATCCAAGCAGCCCAAAAACGATGGATTAACCCCTGAACAACGGCGACAAAGGGACGCCAAAGCGCTGCAAGAAAAGGCGGCAAAGAAGGCGGCGCAGGCGGGAGGGGTCAGCGGC…	MNVTGLKKTAASREFRRLFGSRQPVLLSHQLSSDATSKQGFFSVSLSLSSEHRSGVYCVCDFVWLFQLHSHNSIMSRGSQRERDRERAQARSGGKSKQPKNDGLTPEQRRQRDAKALQEKAAKKAAQAGGVSGGKN	234.255	AT3G24100.1	3e-17		Uncharacterised protein family SERF			uncharacterized
LOC18767368	PRUPE_8G135300	ATGGGTAGCCTTGAAGTGGAGAGAACAACAACAGGATGGGCTGCAAGAGACTCCTCTGGAATTCTCTCACCCTACACCTACACTCTTAGGAACACTGGTCCAGAAGATGTTTATGTCAAAGTCCTAAGCTGTGGGATTTGCCACTCTGATCTTCACCAGGTCAAAAATGACCTTGGTAGGTCAAACTATCCAATGGTTCCCGGGCACGAGGTGGTTGGTGAGGTGTTGGAGGTGGGATCAGATGTGACCAAGTTCAGAGTAGGAGATGTGGTTGGAGTTGGCCTCCTTGTGGGTTGCTGCCGAAGCTGCAACCCATGCAAAACAGACAACGAGCAATACTGCAACAAGAAAATCTGGTCTTACAATGACACTTACTCCGATGGCAAACCCACCCAAGGG…	MGSLEVERTTTGWAARDSSGILSPYTYTLRNTGPEDVYVKVLSCGICHSDLHQVKNDLGRSNYPMVPGHEVVGEVLEVGSDVTKFRVGDVVGVGLLVGCCRSCNPCKTDNEQYCNKKIWSYNDTYSDGKPTQGGFAGELVADQKFVVKIPDGMAWEQAAPLLCAGVTVYSPLNHFGLNLSGLRGGILGLGGVGHMGVKIAKAMGHHVTVISSSDRKKEEALEHVGADEFLVSSDATKMQEAADSLDYIIDTVPVVHPLEPYLSLLRLDGKLILMGVIGAPLQFVSPMVMLGRKTITGSFVGSMKETEEMLEFCKEKGLTSMIEVVKMDYVNTAFERLEKNDVRYRFVVDVAGSNLNP	572.747	AT3G19450.1	0	CAD4, ATCAD4, CAD, CAD-C	GroES-like zinc-binding alcohol dehydrogenase family protein			probable cinnamyl alcohol dehydrogenase 1
LOC18767387	PRUPE_8G045200	ATGAGCCGACATCCTAATGTGAAATGGGCCCAGAGGTCTGATACGGTCTACATAACTATTAACTTGCCGGATGCCCACGATGTAAAGCTTAACCTGGAGCCTGAAGGAAAGTTTTTATTCTCTGCTACTACTGGACCAGAGAAGACACCTTATGAAGTTGACCTTGATCTCTATGACAAGATTGATGTAAATGAGAGCAAGGCTAGTGTTGGCTTGAGAAATATCTGTTACCTTGTGAAAAAGGCTGAGGATAAATGGTGGAGCAGGTTGATAAAACAACAGGGAAAAGCTCCTGTGTTTCTCAAAGTGGATTGGGATAAATGGGTTGATGAAGATGAAGAGCCGGAAGTGAAACCTGATGAAGGTGCTGGAAACAATATGGACTTTGGAGACTTTGAT…	MSRHPNVKWAQRSDTVYITINLPDAHDVKLNLEPEGKFLFSATTGPEKTPYEVDLDLYDKIDVNESKASVGLRNICYLVKKAEDKWWSRLIKQQGKAPVFLKVDWDKWVDEDEEPEVKPDEGAGNNMDFGDFDFSKLNMGGGGGFNPEALGMNMGGAGGFNPNALGMNMGGASGFNPDALGNMGGPGGFNPDALGNFDEEIGDSDTEDEIVDQPPSAAAQSDAKPPASGEHDAKASA	425.41	AT3G03773.1	1e-34		HSP20-like chaperones superfamily protein			uncharacterized protein Os08g0359500
LOC18767393	PRUPE_8G196800	ATGGATTTTACAATTTCCCCAATCCAAATTCTTGAAACAATTTTATCTTTGCTTATTCTATATGCTGCCTTGAGAATCACAGCTCACACTAAGAAGAAGATCACCAGCACAAAGACGACTGTGACGACCAAATTAGTCCCCCAACCCTCTGGAGCATGGCCCTTCATAGGCCACCTCCCTCTGTTACGTAGCAAAGACCCAGTTGCCATAACCTTGGGAGCCATGGCAGATGACCATGGACCAATCTTCTCCCTCAAGCTTGGCCAACACCAAGTGCTGGTCCTCAGCGCCTGGGAGACAGTCAAAGAATGTCTCACAACAAACGATAGAGTTTTTGCCACACGAGCAAGCATTGCAGGAGGCAAGCACTTGGGCTACGACAATGCACTTTTTGCCCTA…	MDFTISPIQILETILSLLILYAALRITAHTKKKITSTKTTVTTKLVPQPSGAWPFIGHLPLLRSKDPVAITLGAMADDHGPIFSLKLGQHQVLVLSAWETVKECLTTNDRVFATRASIAGGKHLGYDNALFALAPYGPYWRHVRKLATLELLSTKRVEMLSHVRTSKVDLFIKNLLSLCTKNGASPTPVHLSELIEFLTFNINVRLIAGKRFTAEQYNEKNSEAWRFEKAVKEALYLFGVFVWSDAMPWLEWLDSLFGHVGSMKRCFKELDCVLGKWLEEHRQRSRPQGKIDRVESDLMDVMISSLQEEDDVISGHSLDNVIKSTALVLILTGTESTSVTLTWALSLLLNNPKTLKAAQQELDIQVGRDRWVQESDLPNLKYLQAILKETLRVYPPGPL…	222.201	AT3G25180.1	4e-180	CYP82G1	cytochrome P450, family 82, subfamily G, polypeptide 1			cytochrome P450 82G1
LOC18767440	PRUPE_8G094500	ATGGCATTATCAGCTACCCGTCTTGCCCTCCTCTCACTCGCAACGCTCTCTCTCGCTCTCACTCTCCAACTCCTCCCATTCCCATTTCCCAATCCAATGGCAGCAACCAAATCCAAAATCCTCTTCATCGGAGGCACTGGCTACATCGGAAAGTTCATAGTCGAAGCCAGCGCCAAGGCAGGCCACCCAACCTACGCTCTGGTTCGAGAGCCCACTCTCTCTAACCCAGCCAAGGCCAAAGTCATCGAGAACTTCAAATCTTTGGGTGTTAATTTCGTCTTGGGTGATCTCTACGACCATGAGAGCCTTGTGAAGGCGATAAAGCAAGTCGATGTGGTGATTTCAACAGTGGGTCACGCTCAGTTGGCTGATCAAGGTACGATCATCGCTGCTATCAAG…	MALSATRLALLSLATLSLALTLQLLPFPFPNPMAATKSKILFIGGTGYIGKFIVEASAKAGHPTYALVREPTLSNPAKAKVIENFKSLGVNFVLGDLYDHESLVKAIKQVDVVISTVGHAQLADQGTIIAAIKEAGNVKRFFPSEFGNDVDRVHAVEPAKTAFATKAKIRRTIEAEGIPHTYVASNFFAGYFLPTLNQPGATAPPREKVVILGDGNPKAIFNKEEDIGAYTIKAVDDPRTLNKILYIRPPANTISFNDLVSLWEKKIGKTLERIYVPEEQLLKNIEEAAVPINVILSIGHSVFVKGDHTNFEVEPSFGVEASALYPDVKYTTVDEYLDQFV	796.143	AT4G39230.1	7e-180		NmrA-like negative transcriptional regulator family protein			isoflavone reductase homolog
LOC18767483	PRUPE_8G098000	ATGGCATCGCTTTCACACCTCCCCATCTTCCTCTTCCTCCTGTTCACCGCTTTCTATTCTGCAGCTTCGCAGTCCTTCATCGGCGTCAATTACGGCCAAGTCGCCGACAACCTCCCTCCGCCGGCGGCCACGGCGAAGCTACTCCAGTCCACCTCCATCAAGCGCGTCCGGCTCTACGGCGCCGACCCGGCCATCATCAAGGCCCTCGCCGGCACCGGAATCGCTATCGCCATCGGCGCATCCAACGGCGACATCCCGGCCCTCGCCTCCGATCCGAACGCGGCGGCTCAGTGGGTGAACTCGAATGTCCTCGCCTTCTACCCGGCCAGCAACATCGACCTCATCAACGTCGGCAACGAGGTCCTTTTCTCCAACGACCAGGGCCTCATCTCGCAGCTC…	MASLSHLPIFLFLLFTAFYSAASQSFIGVNYGQVADNLPPPAATAKLLQSTSIKRVRLYGADPAIIKALAGTGIAIAIGASNGDIPALASDPNAAAQWVNSNVLAFYPASNIDLINVGNEVLFSNDQGLISQLLPAMRNVQSALSAASLGGKVRVSTVHAMTLLAQSDPPSSGRFKPGFQDVLKGLLAFQRDNGSPFAVNPYPFFAYQSDPRPETLAFCLFQPNAGRVDAGTGIKYMNMFDAQVDGVRSALNAIGFNDIEILIAETGWPYRGDSNEVGPSVENARAYNGNLIAHLRSQVGTPLMPGKSVETYIFALYDEDLKPGGTSERSFGLYKPDLTVTYDVGLSKSSQTPSTPSTSTPTTPRVTPSPKPSSAWCVPKAGVSDAQLQANLDYACGHG…	504.388	AT4G34480.1	0		O-Glycosyl hydrolases family 17 protein			glucan endo-1,3-beta-glucosidase 7
LOC18767497	PRUPE_8G143200	ATGGCCACTTCTCTACTTTCTCATCTCTCAGCTCCGCCCTCACCCACCATAGACAATTACCAAGGTCGTCAAGCAGGTGCCTTTAATTCTGGGATCCCAAATACCTTCCTTCATGGCACCAAAGTCTTCTCCGCTACACCTTCTTCTTCAAGAAGGCTCGCAGCTCAAAGACGCTTCAAGTCTGCCTATGCCAAGGCTTCGGAACACATTCCCAAGCAGTTCAGGCAAGAAAATCTCAAAGATGGACTGATGGATAATTACAAGAATGTGCCCCATTATCTGTATGGCCTTTCTCCTTCCCAAATGGACATGTTCATGACAGAAGATAATCCTGCCCGACGTCAGTCAGAAAAAGTTACAGAGCAAAGCATCTCGTCTGCGAACAACTACTTGAATCAT…	MATSLLSHLSAPPSPTIDNYQGRQAGAFNSGIPNTFLHGTKVFSATPSSSRRLAAQRRFKSAYAKASEHIPKQFRQENLKDGLMDNYKNVPHYLYGLSPSQMDMFMTEDNPARRQSEKVTEQSISSANNYLNHGGMWSMSGMDDKGPSKYSMSVSMYRGGARGYGRPRTAPPDLPSLLLDARICYLGMPIVPAVTELLVAQFMWLDYDNPSKPIYLYINSSGTQNEKMESVGSETEAYAIADMMNYVKSDVYTVNCGMAYGQAALLLSLGTRGYRAVQPNSSTKLYLPKVSRSSGSVIDMWIKAKELDANTEYYIELLAKGTGKTKEEIAKDIQRPKYFQGQEAIEYGLVDKIIDSRDAAFEKRNYDEMLTQSRAMRRAGAGGPQAAPSGFR	200.053	AT1G49970.1	0	CLPR1, NCLPP5, SVR2	CLP protease proteolytic subunit 1			ATP-dependent Clp protease proteolytic subunit-related protein 1, chloroplastic
LOC18767544	PRUPE_8G163900	ATGGCAATGGCATTCAAGATGGCTACAACTGGGATGTGGGTTACAGATGAGTGCAAGAGCTCATTCATGGAGATGAAATGGAAGAAGGTCCACAGGTACATAGTGTTCAAGATTGATGAAGGATCAAGGCTGGTCACTGTTGATAAGGTTGGAGGGCCTGGTGAGAGCTATGATGATCTGGCAGCCTCCTTGCCCAAAGATGATTGTAGATATGCTGTCTTTGACTTTGATTTTGTCACTGTTGATAATTGCAGGAAGAGCAAACTCTTCTTCATTGCCTGGTCACCAAGTGCATCAAGAATTAGGGCAAAAATTCTGTATGCAACCTCCAAAGCTGGGCTGAGGAGAGTTCTGGATGGCATCAGCTATGAACTCCAGGCCACTGATCCAACTGAGATG…	MAMAFKMATTGMWVTDECKSSFMEMKWKKVHRYIVFKIDEGSRLVTVDKVGGPGESYDDLAASLPKDDCRYAVFDFDFVTVDNCRKSKLFFIAWSPSASRIRAKILYATSKAGLRRVLDGISYELQATDPTEMGMDVIKDRAK	274.199	AT2G16700.1	6e-87	ADF5, ATADF5	actin depolymerizing factor 5			actin-depolymerizing factor 5
LOC18767560	PRUPE_8G128100	ATGGCAACCAATGGAGCAGACCAGCAAAACCAGGCAGGGAGGCACCAAGAGGTTGGCCACAAGAGCCTCCTTCAAAGTGATGCACTTTACCAGTATATATTGGAGACAAGTGTGTACCCAAGAGAGCCTGAATCCATGAAGGAGCTCAGAGAAGTGACTGCAAAGCACCCATGGAACATCATGACCACATCAGCTGATGAAGGCCAGTTCTTGAACATGCTTCTCAAGCTCATCAATGCCAAGAACACCATGGAGATTGGGGTCTTCACTGGTTACTCCCTCCTTGCCACAGCTCTTGCCATTCCTGATGATGGAAAGATCTTGGCCATGGACATAAATAGGGAAAACTATGACTTGGGTCGTCCAATTATCGAAAAAGCCGGCGTTGCCCACAAGATT…	MATNGADQQNQAGRHQEVGHKSLLQSDALYQYILETSVYPREPESMKELREVTAKHPWNIMTTSADEGQFLNMLLKLINAKNTMEIGVFTGYSLLATALAIPDDGKILAMDINRENYDLGRPIIEKAGVAHKIDFREGPALPVLDQLVEDEKNHGSYDFIFVDADKDNYINYHKRLIDLVKVGGLIGYDNTLWNGSVVAPPDAPLRKYVRYYRDFVLELNKALAADPRIEICMLPVGDGITLCRRIK	575.473	AT4G34050.1	1e-167	CCoAOMT1	S-adenosyl-L-methionine-dependent methyltransferases superfamily protein			caffeoyl-CoA O-methyltransferase 5
LOC18767582	PRUPE_8G261700	ATGAGTCGTGGGGCGGCAGCTGGGACGAAGGGGAAGAAGAAGGGGGCTTCCTTTGTGATAGACTGCGCGAAGCCAGTGGAGGATAAGATCATGGACATCGCCTCACTGGAAAAGTTCCTCCAGGAGCGCATCAAGGTCGGCGGCAAGGCCGGTGCTCTCGGTGACGCCGTCACTGTCTCACGTGAGAAGAACAAGATCACCGTCACCTCTGACTCCAACTTCTCTAAGAGGTATCTTAAATACTTGACCAAGAAGTACTTGAAGAAGCACAATGTGAGGGATTGGCTTCGCGTAATTGCTTCCAACAAGGACCGCGGTGTTTATGAGTTGAGATACTTCAACATTGCTGAGAACGAGGGAGAGGAGGAAGACTGA	MSRGAAAGTKGKKKGASFVIDCAKPVEDKIMDIASLEKFLQERIKVGGKAGALGDAVTVSREKNKITVTSDSNFSKRYLKYLTKKYLKKHNVRDWLRVIASNKDRGVYELRYFNIAENEGEEED	534.812	AT3G05560.3	7e-64		Ribosomal L22e protein family			60S ribosomal protein L22-2
LOC18767597	PRUPE_8G125500	ATGAAATCTTTAACTACTCTCTTCTGTGTCCTACTCTGCATCAATCTCCTGCCCAACTTCGCTGCTTCCCAAATCCTTTTTCAGGGGTTCAATTGGGAATCATGGAAGACGGAAGGAGGATGGTACAACTCTTTAAGGAAGTCCGTACCTGAACTAGCTTCTTCTGGAATTACACATGTTTGGCTTCCTCCACCTTCTCAGGCTGCTTCATCTGAAGGATACTTGCCTGGAAGGCTCTATGATCTCAGTGCATCAAAATATGGAAGCCAAGATGAACTGAAGTCATTGATAAGCGCCTTCCACGATAGTGGGATACAGGCTGTGGCAGACATAGTTATAAACCACAGAACTGCAGAGAAACAAGATGAGAGAGGAATATGGTGCATCTTTGAAGGAGGA…	MKSLTTLFCVLLCINLLPNFAASQILFQGFNWESWKTEGGWYNSLRKSVPELASSGITHVWLPPPSQAASSEGYLPGRLYDLSASKYGSQDELKSLISAFHDSGIQAVADIVINHRTAEKQDERGIWCIFEGGTPDNRLDWGPSLICSDDTQYSDGKGNPDTGAGYDAAPDIDHKNTRVQKELSDWMNWLKTEIGFSGWRFDFVRGYSPEITKLYMTNTSPNFAVGELWNSLAIGSDGKPEYNQDAHRQELAGWVEGAGGAVTAFDFTTKGILQAAVQGELSRLKDPNGRAPGMIGLLPGKSVTFIDNHDTGSTQKIWPFPSDKVIQGYAYILTHPGIPSIFYDHFFDWGLKDEITKLIAIRSRNGIKPDSALRILASDADLYVAAIDEKIIAKIGSRY…	218.326	AT4G25000.1	0	ATAMY1, AMY1	alpha-amylase-like			alpha-amylase
LOC18767600	PRUPE_8G263600	ATGGGTATCGATTTGGTCGCCGGTGGCAAGAGCAAGAAGACAAAGCGCACAGCGCCCAAGTCCGATGATATCTACCTCAAGCTCCTCGTGAAGCTGTATCGGTTTCTTGTAAGGAGGACTGGGAGTAAGTTCAGTGCGGTGATTTTGAAGAGGCTGTTCATGAGCAAGGTGAACAAGGCCCCTCTCTCCCTTTCCAGATTGATTCGTTACATGAACGGGAAGGATGGTAAGATCGCTGTGGTCGTCGGGACTGTGACAGACGACATTCGAGTTTATGAAGTACCTGCTCTGAAAGTGACTGCTCTTAGGTTCACTGAAACCGCCAGGGCTCGGATTGAGAAGGCTGGTGGAGAGTGCTTGACTTTTGACCAGCTGGCTCTCAGGGCCCCTCTTGGCCAG…	MGIDLVAGGKSKKTKRTAPKSDDIYLKLLVKLYRFLVRRTGSKFSAVILKRLFMSKVNKAPLSLSRLIRYMNGKDGKIAVVVGTVTDDIRVYEVPALKVTALRFTETARARIEKAGGECLTFDQLALRAPLGQNTVLLRGPKNAREAVKHFGPAPGVPHSHTKPYVRSKGRKFEKARGKRNSKGFRV	1751.2	AT5G27850.1	5e-119		Ribosomal protein L18e/L15 superfamily protein			60S ribosomal protein L18-2
LOC18767664	PRUPE_8G035100	ATGGATACCAAAGGAAGACTTGTTGCAGGTTCTCACAACAGGAATGAGTTTGTTCTCATCAATGCTGATGAGGTTTCAAGAGTAACATCTGTCAAAGAACTGAGTGGGCAGATTTGCCAGATCTGTGGGGATGAGATAGAGATAACAGTGGATGGGGAGCCATTTGTTGCTTGCAATGAATGTGCATTTCCTGTTTGCAGATCTTGCTATGAGTATGAAAGAAGAGAGGGCAATCAAGCCTGCCCTCAGTGCAAAACCAGATACAAGCGCCTCAAGGGGAGTCCAAGAGTTGAAGGTGATGAAGAAGAGGATGATATTGATGATTTGGAGAATGAGTTTGATATTTCAAGCAATGATAGGAGAGATCCTCACCACATTGCCGAGGCAGTTCTGGCTGCT…	MDTKGRLVAGSHNRNEFVLINADEVSRVTSVKELSGQICQICGDEIEITVDGEPFVACNECAFPVCRSCYEYERREGNQACPQCKTRYKRLKGSPRVEGDEEEDDIDDLENEFDISSNDRRDPHHIAEAVLAARLNIGRGSHVHGSGISTPAEFDSASIASEIPLLTYGQEDVGIASDKHALIIPPFMSRGKRVHPMPTTDSSMSFPPRPMDPKKDLAVYGYGTVAWKERMEDWKKKQNEKLQVVKHQGGNDGGNNNGNEPDDPDLPKMDEGRQPLSRKLPIPSSKINPYRMIILLRLAILGLFFHYRILHPVNNAYGLWLTSIICEIWFGLSWILDQFPKWYPIERETYLDRLSLRYEKEGKPSELADLDVFVSTVDPLKEPPLITANTVLSILSVDY…	234.351	AT2G21770.1	0	CESA9, CESA09	cellulose synthase A9			cellulose synthase A catalytic subunit 2 [UDP-forming]
LOC18767669	PRUPE_8G249800	ATGGCTGGCAGTAATGAAGTCAACGTCAATGAATCCAAGAGGGTCGTTCCGCTTAATACATGGGTACTCATCTCCAATTTCAAGCTAGCTTACAATCTCCTGCGCCGGGCTGATGGAACATTCAACCGTGAGTTGGCAGAGTTTCTTGACCGCAAAGTCCCTGCCAATACAATTCCAGTTGATGGGGTTTTCTCATTTGATCACGTTGATAGAGGTACCGGACTCCTTAACCGGGTTTACCTACAGGCCCCTGAAAATGAGGCTCAATGGGGGATTGTGGATCTTGAGAAACCCTTGAGCACCACCAAGATTGTCCCAGTCATAATTTTCTTCCATGGTGGTAGCTTCACTCATTCCTCAGCCAACAGTGCCATCTATGATACATTCTGTCGCCGTCTT…	MAGSNEVNVNESKRVVPLNTWVLISNFKLAYNLLRRADGTFNRELAEFLDRKVPANTIPVDGVFSFDHVDRGTGLLNRVYLQAPENEAQWGIVDLEKPLSTTKIVPVIIFFHGGSFTHSSANSAIYDTFCRRLVNTCKAVVVSVNYRRSPEHRYPCAYDDGWATLKWVKSRTWLRSGKDSKVHVYLAGDSSGGNIAHHVAVKAAEAEVEVLGNILLHPMFGGQKRTESEKRLDGKYFVTIQDRDWYWRAFLPEGEDRDHPACNIFGPRDKSLEGLKFPKSLVVVAGFDLVQDWQLAYVEGLKNSGQDVKLLYLKQATIGFYFLPNNEHFYCLMEEISNFVNPDC	276.638	AT3G63010.1	0	ATGID1B, GID1B	alpha/beta-Hydrolases superfamily protein			gibberellin receptor GID1B
LOC18767673	PRUPE_8G163500	ATGGGGTTTGCTTCCAAGCGTTCTTCCGTTGCCTCGGGCTCGGCCATCAAATGGCTCGGCTTCGTCACGGCCGTCTGGGTGCAATGCATTTCAGGCAACAACTACACCTTCTCCAACTACTCCGACGCCCTCAAAACCCTCATGAACCTTAACCAACTCGAGCTCAACAGCCTCTCCGTCGCCAAAGACATCGGCAAAGCCTTCGGCCTCCTCGCCGGCCTCGCCTCCGACAAGCTCCCCACCTGGCTCATCCTCCTCATCGGCTCCGTCGAGGGCCTCGTCGGTTACGGCGCCCAGTGGCTGGTCGTCAGTGAAAGAATCAAACCCCTCTCTTACTGGCAGATGTGTATTTTTTTGTGCATGGGAGGCAACAGCACGACGTGGATGAACACGGCGATT…	MGFASKRSSVASGSAIKWLGFVTAVWVQCISGNNYTFSNYSDALKTLMNLNQLELNSLSVAKDIGKAFGLLAGLASDKLPTWLILLIGSVEGLVGYGAQWLVVSERIKPLSYWQMCIFLCMGGNSTTWMNTAILVTCIRNFRRNRGPVSGILKGYVGLSTAIFTDICAALFNNDPASFLLMLSIAPFAVCLTAMVFLREVPPSSSSSEDHQESKYFWVFNGVAVFVALYLLAYDFVPDPSKLFSHIFTVILLILLAAPLMIPAYAFFNTWASKSDRVVSESGADPETRTVEPLLSQAAAADDAQQKAEVADGDVVAVVRRRPVIGEDHTIFEAMTSLDFWVLFVSFLCGVGTGLAVMNNMGQIGLALGYVDVSIFVSLTSIWGFFGRIVSGMVSEYFIR…	361.5	AT4G34950.1	0		Major facilitator superfamily protein			protein NUCLEAR FUSION DEFECTIVE 4
LOC18767713	PRUPE_8G094300	ATGGAGGGAGTTGGGGACGAGAGTGCCTCGGCAGCATCACCTGTCAACAAATGGATATTTGACATGTCGAGGCTCTATCAGTATTATCTGGATAAGACGACTCCTCATTCAGTCCCAAGATGGGTCGGAACTCTTGCTTTGTTCATTGTTTATGCGCTGCGGGTTTATTATATTCAGGGGTTTTACATCATTTCATATGGTCTTGGGATCTATATACTAAATCTTCTGATTGGATTTTTATCACCATTGACTGACCCTGAGATGGAGGCTTCAAGTGGGGCTTTACTGCCGACAAAGGGTTCAGATGAATTCAAGCCTTTCATTCGCAGACTTCCTGAGTTTAAGTTCTGGTATTCTTTCACAAAGGCTTTCTGCATAGCATTTGTCATGACCTTCTTC…	MEGVGDESASAASPVNKWIFDMSRLYQYYLDKTTPHSVPRWVGTLALFIVYALRVYYIQGFYIISYGLGIYILNLLIGFLSPLTDPEMEASSGALLPTKGSDEFKPFIRRLPEFKFWYSFTKAFCIAFVMTFFSAFDVPVFWPILLCYWIVLFVLTMRRQIAHMIKYKYVPFNIGKQRYGGKKPSASSSGRKD	243.919	AT2G21600.1	5e-109	ATRER1B, RER1B	endoplasmatic reticulum retrieval protein 1B			protein RER1B
LOC18767741	PRUPE_8G119500	ATGGCCCAGCAATCCAACGGCGGCGATCTGGGCACACAGCAGCAGCAGCAGCAGCAACAACAGCAGCAGCAGCAACAGCAGCAGTGGATGCATCAGCATCAGCATCAGCAGCAATGGATGGCCATGCAGTACCCAGCAGCCGCGATGGCGATGATGCAGCAGCAGATGATGGTGTACCCGCAGCATTACATGCCTTACGCTGCTGCAGCTGCCCATCCTCATCATCCTCATCACAATCCCTACCAGCAGCAGCCTCAGGGCGTGCCTTATCAGCAGCAGCAGCAGCCGCCGAAGCAGCTGCAGCAGTCTCCCTCTCAGAAACAGGGGCCCACCGATGAGATCAGGACCATCTGGGTGGGCGACCTTCACCACTGGATGGACGAGACTTACCTTCATGGA…	MAQQSNGGDLGTQQQQQQQQQQQQQQQQWMHQHQHQQQWMAMQYPAAAMAMMQQQMMVYPQHYMPYAAAAAHPHHPHHNPYQQQPQGVPYQQQQQPPKQLQQSPSQKQGPTDEIRTIWVGDLHHWMDETYLHGCFAHTGQVSTVKVIRNKQTAQSEGYGFVEFFSREAAEEVLQSYNGAAMPNTEQPFRLNWATFSAGDRRADTSSDLSIFVGDLATDVTDTMLQETFGSRYSSVKGAKVVLDANTGRSKGYGFVRFGDENERSRAITEMNGAYCSSRPMRIGVATPKKSPAYQQQYSSQALVLAGGGHASNGAVAQGSQFDSETNNTTIFVGGLDSDVNDEDLRQPFSQFGEVVSVKIPVGKACGFVQFANRKDAENAMQMLNGTVIGKQTVRLSWGR…	933.434	AT3G19130.1	6e-174	ATRBP47B, RBP47B	RNA-binding protein 47B			polyadenylate-binding protein RBP47
LOC18767748	PRUPE_8G128300	ATGGCGGCTCCTGCAATAGAGTCAGTACAGTGCTTCGGCCGCAAGAAAACCGCGGTGGCCGTGACCTACTGCAAGCGTGGGCGAGGCCTGATCAAGATCAATGGCTGCCCAATCGAGCTCGTCGAGCCGGAGATCCTCCGCTTCAAGGCCTACGAGCCTATTCTCCTCCTGGGACGACACCGTTTCGCTGGAGTCGACATGCGCATTCGCGTCAAGGGTGGTGGTCACACCTCTCAGATCTACGCCATTCGCCAGAGCATAGCCAAAGCTCTGGTCGCTTTTTACCAAAAGTATGTCGATGAGCAGAGCAAGAAGGAGATCAAGGACATCCTCGTTAGGTACGATAGGACCCTCCTTGTTGCTGACCCAAGGCGCTGCGAGCCCAAGAAGTTCGGTGGT…	MAAPAIESVQCFGRKKTAVAVTYCKRGRGLIKINGCPIELVEPEILRFKAYEPILLLGRHRFAGVDMRIRVKGGGHTSQIYAIRQSIAKALVAFYQKYVDEQSKKEIKDILVRYDRTLLVADPRRCEPKKFGGRGARARFQKSYR	1537.37	AT2G09990.1	3e-92		Ribosomal protein S5 domain 2-like superfamily protein			40S ribosomal protein S16
LOC18767764	PRUPE_8G083900	ATGAGCGCAGTGTCAACAGCAGCGTACGCAGCTCGTCGAGCAGCTCAGAAGGAGAAGGTTCGGATCCTCTACAGACGAGCCCTCAAAGACACTCTCAACTGGGCTGTTCACCGCCACCTTTTCTACCCAGATGCCGATGCTCTGCGCGAGAGGTTCGAAACCAACAAGCACGTGGAAGATCCGGACACAATTGATAGACTCATAGAAAATGCTGAAGCCTCCTACAATAAGTGGCGCCACCCTGATCCTTATGTTGTTCCTTGGGCTCCCGGTGGTTCAAAGTTTCATCGGAATCCCACTCCACCTGCAGGGATTGAGATAGTATATGACTATGGAAAAGAAGATAATGAGTAA	MSAVSTAAYAARRAAQKEKVRILYRRALKDTLNWAVHRHLFYPDADALRERFETNKHVEDPDTIDRLIENAEASYNKWRHPDPYVVPWAPGGSKFHRNPTPPAGIEIVYDYGKEDNE	232.054	AT4G34700.1	1e-64	CIB22, AtCIB22	LYR family of Fe/S cluster biogenesis protein			NADH dehydrogenase [ubiquinone] 1 beta subcomplex subunit 9
LOC18767822	PRUPE_8G114000	ATGGAGGAAGAAGACAAACAGCCACTGAAGGAAGAGAAAAGTCTTCTACAAGAAGAAAAAGAGGAAGCAAAAAAAGCAGAAGCAGCTGAAGCACAAGCATCACCGGCAAAAAGTGGAGGATGGGGAGGCTGGGGATTTTCCTCTGTTTTCTCAGATCTCCAGAAAGCCGCCGAAGAGATCTCTCGCAATGCGGCTGCAGTTGCTCAGACTGCAGCAAAGAGCATTGCCGACATGCAAAACCCTGCAGAGGACTCGGAAGAATCTTCCAAGGAGGAGGAAGGGGATACTGAAAAGGAAAGCCAGGATGGGACTGAAAGCCAAGATGAGCATGAAAAGCAACGAAAGGCTGCTCTAGAAAAATTAGAAAAAGCTAGTGAAGATTCGTTTCTCGGTCAGGGT…	MEEEDKQPLKEEKSLLQEEKEEAKKAEAAEAQASPAKSGGWGGWGFSSVFSDLQKAAEEISRNAAAVAQTAAKSIADMQNPAEDSEESSKEEEGDTEKESQDGTESQDEHEKQRKAALEKLEKASEDSFLGQGLKVLDSSVENFASGAWQALGSALKGSTDLVHKLENSAVNLAGSIQQGGLPTAAGSAAPSLLETGKAFTSKGMQVLELVGKETLDLLITETGIEVEKNSKPSEQEAEEDQLYEEVGFDRCFYIYGGPEQLEELEALSSHYALLFNRRKGKLSXQKQTTYDGKLKQVQQIFSLDIELDGSGAESDKGKRXETGDDGNSDEMKSLHDSSVSKACXYGRLGILPLFTSALAGQAVNDIIQRTTGRLESLHSEGVHRLSEMCCSAVSQLLM…	422.97	AT2G15860.1	0		unknown protein; FUNCTIONS IN: molecular_function unknown; INVOLVED IN: biological_process unknown; LOCATED IN: cellular_component unknown; EXPRESSED IN: 24 plant structures; EXPRESSED DURING: 13 growth stages; Has 30201 Blast hits to 17322 proteins in 780 species: Archae - 12; Bacteria - 1396; Metazoa - 17338; Fungi - 3422; Plants - 5037; Viruses - 0; Other Eukaryotes - 2996 (source: NCBI BLink).			uncharacterized
LOC18767838	PRUPE_8G220700	ATGCCGTTCAAGAGATACGTTGAGATCGGACGAGTGGCTCTCGTCAACTACGGGAAAGACTACGGCAGGCTCGTCGTGATCGTCGATGTCCTCGACCAAAACAGGGCTCTTGTTGATGCCCCTGACATGGTGAGGACCCAATTGAATTTCAAGAGGCTTACACTCACTGATATTACCATTGACATCAAAAGGGTTCCTAAGAAGAAGACTCTGCTTGCTGCCATGGAGGCTGCTGACGTAAAGAACAAATGGGAAAACAGCTCGTGGGGCAGGAAGCTGATAGTGCAGAAGAGAAGAGCTGCACTAAATGATTTTGATAGGTTTAAGCTCATGTTGGCAAAGATCAAGAGGGCGGGAATCATCAGGCAGGAGCTAACGAAACTCAAAAAGGAGAGTGCA…	MPFKRYVEIGRVALVNYGKDYGRLVVIVDVLDQNRALVDAPDMVRTQLNFKRLTLTDITIDIKRVPKKKTLLAAMEAADVKNKWENSSWGRKLIVQKRRAALNDFDRFKLMLAKIKRAGIIRQELTKLKKESAA	557.151	AT2G20450.1	6e-77		Ribosomal protein L14			60S ribosomal protein L14-1
LOC18767882	PRUPE_8G191900	ATGACTGGGTTTGCAGGAGGTGAAAGCGTTACTCTTGATCTTCTCAAGAAGAAAATGGCGGAGTTTGCCAAAGAAAGAGACTGGGATCAGTTCCACAGCCCCAGAAACCTTCTCTTAGCTCTGGTGGGTGAAGTTGGAGAGCTATCTGAGATATTCCAATGGAAAGGGGAGGTTCCAAAGGGACTCCCTGACTGGAAAGAGGAGGAGAAAGAACACCTGGGGGAAGAGCTCTCTGATGTTCTGCTTTATTTGGTCAGGCTTTCTGACATCTGTGGTGTTGATCTTGGCAAAGCTGCTCTTCGCAAGGTTGGGCTCAATGCCATCAAGTACCCTGTTAAACAGAGCCAAATGAATATCACAAGCAACAACACCACCATCAACAGTGATGAAAATGCACAG…	MTGFAGGESVTLDLLKKKMAEFAKERDWDQFHSPRNLLLALVGEVGELSEIFQWKGEVPKGLPDWKEEEKEHLGEELSDVLLYLVRLSDICGVDLGKAALRKVGLNAIKYPVKQSQMNITSNNTTINSDENAQRV	686.167	AT3G25400.1	7e-58		CONTAINS InterPro DOMAIN/s: NTP Pyrophosphohydrolase MazG-related, RS21-C6 (InterPro:IPR011394), EAR (InterPro:IPR009039), NTP pyrophosphohydrolase MazG, putative catalytic core (InterPro:IPR004518); Has 1123 Blast hits to 1121 proteins in 452 species: Archae - 22; Bacteria - 753; Metazoa - 81; Fungi - 3; Plants - 83; Viruses - 0; Other Eukaryotes - 181 (source: NCBI BLink).			dCTP pyrophosphatase 1
LOC18767886	PRUPE_8G204400	ATGATTAGTGGGGTTTTAGCTTCAGCTTCCCCACAAGCTGTTTGTTCTCTGCTGTCTAAACCCAGAACCAGCTGCTGTTGCTATGCATCCAGCTCTGTCAGTGGTCACAAGCCATGCTCATCAGATCTCAAGCTCCGAAGTTTTGGCCTTTTTGGTACAAAGGGGTCTCAGAGAAGCAGAGTGCAGTGCAGTAGTAGCAGCGGACCTGGCTCTGGTGATGGTGATAGCAGGAGTGTTCTGGATGCCTTCTTCTTGGGGAAAGCTCTAGCAGAAGCCATAAATGAGCGTATTGAGTCCAGTGTTGGTGAGTTTTTGAGCACAATTGGTAGGCTGCAAGCTGAGCAACAAAAGCAAGTAGAAGAGTTCCAGGAAGATGTACTGGAAAGAGCCAAAAGAGCG…	MISGVLASASPQAVCSLLSKPRTSCCCYASSSVSGHKPCSSDLKLRSFGLFGTKGSQRSRVQCSSSSGPGSGDGDSRSVLDAFFLGKALAEAINERIESSVGEFLSTIGRLQAEQQKQVEEFQEDVLERAKRAKEKAAREAAEVQGLAKPPTAEYITPVKITNGVTQVTSTTTTTTSNVTPVNQPSLSGPASPATANEPGPADEDTIFGVPIEE	356.955	AT4G13200.1	3e-37		unknown protein; FUNCTIONS IN: molecular_function unknown; INVOLVED IN: biological_process unknown; LOCATED IN: thylakoid, chloroplast thylakoid membrane, chloroplast, plastoglobule; EXPRESSED IN: 22 plant structures; EXPRESSED DURING: 13 growth stages; Has 97 Blast hits to 97 proteins in 46 species: Archae - 0; Bacteria - 65; Metazoa - 2; Fungi - 0; Plants - 28; Viruses - 0; Other Eukaryotes - 2…			uncharacterized protein At4g13200, chloroplastic
LOC18767909	PRUPE_8G247700	ATGGCAGGGCCTTCTCTCACTATCTTCTTCTTGAGCTTGCTATTCTTCTGTGCGATATCTGAAGCTTCCAAGTGCTCAGTCAAAGGGTTACCTGAAGTAAGAAATATCAGTGCCCTTCCACAGAGTAACTATGGAAGGGGAGGTTTGGTACACACAACTGTTGCTGGTTCACTCTTGCATGGGTTGAAAGAGGTTGAGGTTTGGCTGCAAACATTTTCTCCAGGATCAGGCACACCAATACACAGGCATTCTTGTGAAGAAGTTTTTGTTGTCCTAAAGGGGAGTGGAACTCTCTACCTTGCACCAAACTCACACGAGAAGTCCCCTGGAAAACCACAAGAATTCTCTATCTTTGCAAATAGCACATTTCACGTACCTGTTAACGATGCTCACCAGGTC…	MAGPSLTIFFLSLLFFCAISEASKCSVKGLPEVRNISALPQSNYGRGGLVHTTVAGSLLHGLKEVEVWLQTFSPGSGTPIHRHSCEEVFVVLKGSGTLYLAPNSHEKSPGKPQEFSIFANSTFHVPVNDAHQVRNTNEHEDLQVLVVISRPPVKVFTYENWFVPHAAAKLKFPYYWDEECLEVEPPPKDEL	244.492	AT4G02980.1	1e-90	ABP1, ABP	endoplasmic reticulum auxin binding protein 1			auxin-binding protein T85
LOC18767915	PRUPE_8G198600	ATGATCTACGACGTCAACTCACCCCTCTTCCGATCCTTCCTCAGCCAGAAGGGAGGCTCCTCCGATAAGAGGAAGTTGGAAGAGCAGAAGCCCAAGGAACATAGGCCGAAGGCCAGTGAGAACAAGCCCGTAATGAATGAGTGA	MIYDVNSPLFRSFLSQKGGSSDKRKLEEQKPKEHRPKASENKPVMNE	268.889	AT3G07230.1	4e-20		wound-responsive protein-related			wound-induced basic protein
LOC18768002	PRUPE_8G001200	ATGGCTTCTCTGGCAGCATCAACAGCGGCTGCTTCCCTTGGTGTGTCTGAATTGCTTGGAAACAGTCTGAACAACTTTAGCGGCGCAGCCAGGTCGGCCCCTTCAGCCACCACACCAGCCACCTTCAAGACCGTCGCACTCTTCTCCAAGAAGAAGGCCGCACCCCCTCCCAAGGCCAAGGCTGTTGCTCCTGCTGACGAAGAGCTCGCCAAGTGGTATGGTCCTGATAGAAGAATCTTCTTGCCTGAGGGGCTCTTGGACCGCTCAGAGATCCCAGAGTACTTGACTGGAGAAGTTCCTGGCGATTATGGATATGATCCTTTTGGGCTAGGCAAGAAGCCAGAAAACTTCAGCAAATACCAAGCATATGAGCTAATCCATGCTCGGTGGGCTATGCTT…	MASLAASTAAASLGVSELLGNSLNNFSGAARSAPSATTPATFKTVALFSKKKAAPPPKAKAVAPADEELAKWYGPDRRIFLPEGLLDRSEIPEYLTGEVPGDYGYDPFGLGKKPENFSKYQAYELIHARWAMLGAAGFIIPEAFNKFGANCGPEAVWFKTGALLLDGNTLNYFGKNIPINLIFAVVAEVVLLGGAEYYRITNGLDLEDKLHPGGPFDPLGLAKDPDQAALLKVKEIKNGRLAMFSMLGFFLQAYVTGEGPVENLAKHLSDPFGNNLLTVIGGSVERAPTL	1584.15	AT4G10340.1	4e-152	LHCB5	light harvesting complex of photosystem II 5			chlorophyll a-b binding protein CP26, chloroplastic
LOC18768018	PRUPE_8G184100	ATGGAGAAGGAAAAGAAGTCTCCAGTTTCTGATGTAGGAGCATGGGGTATGAATATTGTGAGCTCTGTGGGCATTATCATGGCCAACAAGCAGCTCATGTCCCCTCACGGCTTTGCTTTTGGCTTTGCCACAACTTTGACTGGCTTTCACTTCTCTGTTACCGCATTGGTTGGTCTGGTGTCAAATGCCACTGGTTACTCTGCATCAAAGCATGTTCCTTTGTGGGAACTTGTTTGGTTCTCACTTGTAGCCAATGCTTCAATCACTGGAATGAACTTGAGTCTCATGCTCAACTCTGTTGGATTTTATCAGATATCGAAGCTGAGCATGATTCCCGTGGTATGCATGATGGAATGGATTATTCATGGAAAACATTTTTCAAGGGAGGTCAAGATGGCT…	MEKEKKSPVSDVGAWGMNIVSSVGIIMANKQLMSPHGFAFGFATTLTGFHFSVTALVGLVSNATGYSASKHVPLWELVWFSLVANASITGMNLSLMLNSVGFYQISKLSMIPVVCMMEWIIHGKHFSREVKMAVAVVVVGVGICTVTDVKVNAKGFLCACVAILCTSLQQISIGSLQKKYSIGSFELLSKTAPIQALSLLVLGPFVDYFLTGKLLSEYKFSSGAFFFILLSCSLAVFCNISQYLCIGRFSAVSFQVLGHMKTVCVLTLGWLLFDSQLTFKNLLGMALAVLGMIVYSWAVEAEKQPKILPSTRDNLSEEDLKPLKEGIAESPLKDTELGESKV	248.32	AT1G21070.1	0		Nucleotide-sugar transporter family protein			UDP-galactose transporter 2
LOC18768022	PRUPE_8G222500	ATGGAAGCCACTCTCTTCAGCTTCCCTTCCTCCAAACCCCCATCACCTTCCCTAACCCAAACCCAGTCCAAAACCCTTCTGACCCGACCCACCAACCCATTTCTCTCCCTCACCCCCCGACCCACCCGCCACCACCACCGCCTGCCCACAATCCGATCTGCCATCTCGCGCACCAAGAAAGAACAGACCGTCGAAACCATCAAAGAGAATCTCGAGAACTGCCATCTCTTGGCCGGCATCAAATACAAAGGCCTCACCGTGAAGCAATTTCAAGACCTCCGCAAAGTCCTACCCGAGACCACAAAGCTCATTGTGGCCAAGAACACTCTGGTCTACAAAGCCATAGAGGGAACTCCATGGGAGGCTCTCAAGCCCTGCATGACCGGCATGAACGCTTGG…	MEATLFSFPSSKPPSPSLTQTQSKTLLTRPTNPFLSLTPRPTRHHHRLPTIRSAISRTKKEQTVETIKENLENCHLLAGIKYKGLTVKQFQDLRKVLPETTKLIVAKNTLVYKAIEGTPWEALKPCMTGMNAWLFVHSEEIPPAIKPYRDFQKEKKLDSNDFTGAVFEGKFYAPGDFKQLETMPTRAEIYAKLLGTLNSPASSLVGTIQAPARELVMLLKAYVQKLEEESGGGQ	448.133	AT5G13510.1	1e-106		Ribosomal protein L10 family protein			50S ribosomal protein L10, chloroplastic
LOC18768030	PRUPE_8G190500	ATGATGGGTAGAAATTTCAAGTTGGTTTTTGTTTTGGTGGTGGCAATGGCTGTGTTGCTCGAAGGGTCGAGAGTGTTGGGTTTGTGCAATATGAGCGATGAAGGCTTAGCTTCTTGCAAGCCAGCGGTGGCAAAGGCAACACCAGAGAAGCCAAACCCAGATAAGCCAACTCCCGAGTGTTGTGAGGCTCTCAAAGGAGCTGACTTGAAATGCCTCTGTGGATATAAGAACTCGTTTCTTTTGCCTTCTTTGGGCATCGACCCTGCCCTTGCCATGGCTCTTCCTGCTAAGTGCAACCTCACCCCTCCTGCCGATTGCTAG	MMGRNFKLVFVLVVAMAVLLEGSRVLGLCNMSDEGLASCKPAVAKATPEKPNPDKPTPECCEALKGADLKCLCGYKNSFLLPSLGIDPALAMALPAKCNLTPPADC	414.742	AT5G48490.1	7e-21		Bifunctional inhibitor/lipid-transfer protein/seed storage 2S albumin superfamily protein			putative lipid-transfer protein DIR1
LOC18768033	PRUPE_8G260100	ATGGCGACGACTGGAGAGAAGCAAGTGATGGTGATCGGGGCCGACGAGAGCGAGCAGAGCACTTATGCTCTGGAATGGACTCTGGACCATTTCTTCGCGCCCTTCGGTCCCACGTCTCCGTTCAAGCTCGTCATCGTCCACGCCAAGTCCATGCCTTCCTCCGTCGTTGGCCTCGCCGGCCCTGGAGCGGCGGAGGTTTTGCCAATTGTGGATGCTGATTTGAAGAGGATGGCTGCCCGCGTTGCTGACAAGGCTAAGCAACTTTGCGCTACCAAATCGGTGACTGATGTCACTGTGGAGTTGGTGGAAGGAGATGCTAGGAATGTTCTCTGTGACGCTGTTGACAGGCACCATGCATCCGTCTTGGTTGTCGGTAGTCATGGCTATGGAGCCATAAAA…	MATTGEKQVMVIGADESEQSTYALEWTLDHFFAPFGPTSPFKLVIVHAKSMPSSVVGLAGPGAAEVLPIVDADLKRMAARVADKAKQLCATKSVTDVTVELVEGDARNVLCDAVDRHHASVLVVGSHGYGAIKRAVLGSVSDYCAHHAHCSVMIVKKPKTKH	228.371	AT2G47710.1	2e-82		Adenine nucleotide alpha hydrolases-like superfamily protein			universal stress protein PHOS34
LOC18768037	PRUPE_8G227800	ATGAATGCTCGAAGGGACTACCGTGGCAACAAAGTTGCTCTTTTTGATGGCATTGAGGAGGGTGGCATCAGGGCCTCGGCTTCCTACTCCCATGAAATTGATGAACATGATAATGAAAGAGCAGTGGACGGATTGCAAGATAGAGTCAATTTGCTGAAGAGATTGTCTGGTGATATACATGAGGAGGTGGAGAGTCATAATCACATGTTGGACAGAATGGGAAATGATATGGATTCATCAAGGGGAGTGCTATCTGGTACAATGGACAAGTTTAAGATGGTTTTCGAGACGAAGTCAAGCCAGAGAATGTTTACACTAGTGGCATCTTTTGTTGTCATTTTCCTAGTTATATACTATCTCACTAGGTAA	MNARRDYRGNKVALFDGIEEGGIRASASYSHEIDEHDNERAVDGLQDRVNLLKRLSGDIHEEVESHNHMLDRMGNDMDSSRGVLSGTMDKFKMVFETKSSQRMFTLVASFVVIFLVIYYLTR	435.503	AT3G58170.1	5e-67	ATBS14A, ATBET11, BET11, BS14A	BET1P/SFT1P-like protein 14A			bet1-like SNARE 1-1
LOC18768059	PRUPE_8G085100	ATGGCTTCTGCTTCTCTCCTCAAGTCTTCTCCAGTCCTCGACAAATCTGAGTGGGTGAAAGGCCAGACTCTCCGTCAGCCCTCAGCCTCTTCAGTGGTGAGATGCCTCCCCACCACCCCATCTGGTCTCACCATTCGTGCCAGTTCCTACGCTGATGAGCTTGTTAAGACCGCTAAAACTGTTGCATCCCCAGGCCGTGGTATCTTGGCCATGGATGAATCAAATGCAACCTGTGGCAAGCGTCTTGCCTCAATTGGTTTAGAGAACACCGAGGCTAACCGCCAAGCCTACCGTACACTCCTTGTATCAGCCCCTGCCCTTGGCCAGTACGTCTCTGGTGCCATTCTTTTTGAGGAGACTCTCTACCAATCCACCATCGATGGTAAGAAGATCGTTGAT…	MASASLLKSSPVLDKSEWVKGQTLRQPSASSVVRCLPTTPSGLTIRASSYADELVKTAKTVASPGRGILAMDESNATCGKRLASIGLENTEANRQAYRTLLVSAPALGQYVSGAILFEETLYQSTIDGKKIVDVLVEQGIVPGIKVDKGLVPLAGSNDESWCQGLDGLASRTAAYYQQGARFAKWRTVVSIPNGPSALAVKEAAWGLARYASIAQDNGLVPIVEPEILLDGEHTIDRTFEVALKVWAEVFFYLAENNVLFEGILLKPSMVTPGAEAKERATPQQVADYTLKLLHRRIPPAVPGIMFLSGGQSELEATLNLNAMNQSTNPWHVSFSYARALQNTCLKTWGGRPENVKAAQDALLLRAKANSLAQLGKYTGEGESEEAKKELFVKGYVY	267.454	AT4G38970.1	0	FBA2	fructose-bisphosphate aldolase 2			fructose-bisphosphate aldolase 1, chloroplastic
LOC18768092	PRUPE_8G141900	ATGGGGCACTCCAACGTGTGGAACTCTCACCCTAAGAACTACGGCCCTGGATCGCGCACCTGTCGCGTGTGTGGAAACCCTCATGGGTTGATCAGGAAGTACGGTCTCATGTGCTGCAGGCAGTGCTTCCGTAGCAATGCCAAGGAAATTGGCTTCATTAAGTATCGTTAA	MGHSNVWNSHPKNYGPGSRTCRVCGNPHGLIRKYGLMCCRQCFRSNAKEIGFIKYR	872.011	AT4G33865.1	1e-32		Ribosomal protein S14p/S29e family protein			40S ribosomal protein S29
LOC18768116	PRUPE_8G263200	ATGTCGTCTCTCGCAGCCATTCTCGCCCTCTTCGTCATCCTATCCCCATTCGCTACGTCATCAACGGCCGCCGCCGGCTACGATGACTCACGGTCGGCGTACGATATCATCCAAGACTTCGACTTCCCGATGGGTCTGCTCCCGAAGGGCGTCACTGGTTACGAACTAGACCGAAGCAACGGTCAATTCCGAGCTTATTTGAACGGTTCCTGCAGTTTCGCATTGGAAGGGTCGTACCAGCTCAAGTATAAGTCCACCATCAGTGGCTCTATCTCCAAGAACAAGCTCTCTGGGCTCACTGGGGTTAGCGTCAAGGTCTTGTTCTTGTGGCTCAACATCGTCGAGGTCACTCGGAGCGGCGACAATCTTGAATTCTCTGTGGGGATCGCTTCTGCTGCG…	MSSLAAILALFVILSPFATSSTAAAGYDDSRSAYDIIQDFDFPMGLLPKGVTGYELDRSNGQFRAYLNGSCSFALEGSYQLKYKSTISGSISKNKLSGLTGVSVKVLFLWLNIVEVTRSGDNLEFSVGIASAAFPIDNFYECPQCGCGLDCVNGQVRKIKMNPLVSSI	455.834	AT1G02816.1	1e-66		Protein of unknown function, DUF538			uncharacterized protein At5g01610
LOC18768141	PRUPE_8G232200	ATGGGGTTTGAAGAGACGGAGCTGAGGCTAGGGTTACCAGGAAATGGTGGAAGCCATGAAGGAGATCAAGCGGCAGCGGTGACGATGAGGAAGAGAGGGTTCTCTGAAACTGAGAGCAGTGAGGATGAGATCAGCTGTGAGACAAGCTGTGTGGATTTGAAGCTTAACCTTTCTAATTCTAAGGAGCAGGCAATAACTACTGGGAAAGATGTAACTGAAAAGTCCAAGACCAACAAGGACAACAAACTTGATCTCCCAGCTGCTGATCCTGCAAAGCCTCCAGCCAAGGCACAAGTTGTGGGCTGGCCACCGGTGCGATCGTTCCGAAAGAACATGTTCACGGCGTTGCAGAAGAGCCCGAGTGATAAAGAAAGTGAGCACAACAAGGGCAGCAGCAAT…	MGFEETELRLGLPGNGGSHEGDQAAAVTMRKRGFSETESSEDEISCETSCVDLKLNLSNSKEQAITTGKDVTEKSKTNKDNKLDLPAADPAKPPAKAQVVGWPPVRSFRKNMFTALQKSPSDKESEHNKGSSNAVTLVKVSMDGAPYLRKVDLKMYKSYPELSDALAKMFSSFAIGNCGSQGMKDFMNESKLMDVLKGSDYIPTYEDKDGDWMLVGDVPWEMFVESCKRLRIMKGKEAVGLAPRAMEKCKNRS	1385.06	AT3G23050.1	2e-96	IAA7, AXR2	indole-3-acetic acid 7			auxin-induced protein AUX28
LOC18768150	PRUPE_8G176700	ATGGCTTTCTCTTTCTCTCTCTCCACACCCACCATACCCACACTCCTCTTCACCCTCTCCCTCCTCCTCTCATTTCTCACCACACCCGCCTCCTCCGCCACCTTCAACTGCTCCGCCACCACCACCTGCCAGTCCCTCATCGACTACGTCCCCGAAAATACCACAACCCTCAACGCCATCAAAACCCTCTTCAACATCTCCCACCTCCGCACCCTTCTCGGAGCCAACAACCTCCCCCTCTCCACCGCCCCGACCCAAAACGTAACCGCCCTCCAAAAGATCCTCATCCCTTTCACGTGCCTCTGCTCCAACGGCACCGGCGTCTCCAACAAGCGCCCGCAGTACATCGTGAAGCCCGGCGACGACCTCGACCACATCGCTACGGTCGTGTTCTCGAGG…	MAFSFSLSTPTIPTLLFTLSLLLSFLTTPASSATFNCSATTTCQSLIDYVPENTTTLNAIKTLFNISHLRTLLGANNLPLSTAPTQNVTALQKILIPFTCLCSNGTGVSNKRPQYIVKPGDDLDHIATVVFSRLVKYQEIAAVNNIPDPSLIGIGKKLWIPLPCSCDEVNGERVVHYGHVVEAGSSVEAIATKYGTDQETLLRINGIADPKTLQANQVLDVPLKACSSSVSNNSLDAPLLVSNNTYVFTANNCVKCQCSPANNWTLQCEPSTVNSTGCPAMQCQGSSQLFLGNTTTSGCDQTTCTYAGYTNKTNILTTLATQSTCAAPPPDNNNNASRMGLQGSSWSFLFAAIHLALLLLHVLQ	214.02	AT2G17120.1	4e-100	LYM2	lysm domain GPI-anchored protein 2 precursor			lysM domain-containing GPI-anchored protein 2
LOC18768175	PRUPE_8G021500	ATGGCTACCAGATTGCAATTCGAGAACTCGTGCGAGGTTGGGGTGTTCTCGAAGCTGACGAATGCCTACTGTTTGGTTTCCATCGGAGGCTCTGAGAATTTCTACAGCACATTCGAGGCCGAGTTGGCAGATGTCATCCCTGTCGTTAAAACCTCCATTGGCGGCACTCGCATCATTGGCCGCCTCTGTGCTGGAAACAAAAACGGGCTTCTTTTGCCTCACACGACCACAGACCAAGAACTCCAGCACTTGAGGAACAGTTTACCTGATCATGTTGTTGTTCAGCGCATTGAAGAGAGACTATCTGCTCTTGGAAACTGTATTGCTTGCAATGATCATGTTGCTCTTACACACACGGATCTTGACAGAGAAACTGAGGAGATGATCGCAGATGTACTT…	MATRLQFENSCEVGVFSKLTNAYCLVSIGGSENFYSTFEAELADVIPVVKTSIGGTRIIGRLCAGNKNGLLLPHTTTDQELQHLRNSLPDHVVVQRIEERLSALGNCIACNDHVALTHTDLDRETEEMIADVLGVEVFRQTIAGNILVGSYCAFTNRGGMVHPHTSVEDLDELSTLLQVPLVAGTVNRGSEVIAAGMTVNDWTAFCGSDTTATELSVIESVFKLREAQPSAIVDEMRKSLIDSYV	258.796	AT3G55620.1	1e-170	emb1624	Translation initiation factor IF6			eukaryotic translation initiation factor 6-2
LOC18768177	PRUPE_8G067900	ATGGGAGTGGAGAGGGAAGTCGTGAGTGCTGGAACCGGTCCAAAACCGACCGTCGGTCAGAAGGTCACCGTTCATTGCACTGGTTACGGAAAAAATGGTGATCTGAGTCAGAAGTTTTGGAGTACGAAGGACCCTGGGCAGAATCCTTTCAGCTTCCAAATTGGGAAGGGTGCTGTTATAAAAGGATGGGATGAAGGTGTGCTCCAAATGCAAGTGGGAGAAGTTGCTCGTCTACGGTGCTCTCCAGATTATGCTTATGGTGCTAACGGATTTGGTGCATGGGGGATACAACCTAATTCGGCTTTGGTTTTTGAGATTGAAGTCCTCGGTGCGGAGTAA	MGVEREVVSAGTGPKPTVGQKVTVHCTGYGKNGDLSQKFWSTKDPGQNPFSFQIGKGAVIKGWDEGVLQMQVGEVARLRCSPDYAYGANGFGAWGIQPNSALVFEIEVLGAE	273.577	AT5G64350.1	1e-60	FKBP12, ATFKBP12	FK506-binding protein 12			peptidyl-prolyl cis-trans isomerase FKBP12
LOC18768211	PRUPE_8G265100	ATGGTTTCGCTCAAGCTCCAGAAGAGGCTCGCCGCGAGCGTGCTCAAGTGTGGTCGCGGCAAGGTCTGGCTCGACCCCAATGAAGTCAGCGACATCTCCATGGCCAATTCTCGCCAAAACATACGGAAGTTGGTCAAGGATGGTTTCATCATCAGGAAGCCAACCAAGATCCACTCTCGATCTCGTGCACGCCGCATGAAGGAGGCTAAGAGGAAGGGGCGTCACTCTGGACATGGTAAGCGTAAGGGTACAAGGGAGGCAAGGCTTCCTACCAAGATCCTGTGGATGCGGAGGATGCGTGTGCTCAGGCGTTTGCTTCGCAAGTACAGGGAATCAAAGAAGATTGACAAGCACATGTACCATGACATGTACATGAAGGTTAAGGGTAATGTTTTCAAG…	MVSLKLQKRLAASVLKCGRGKVWLDPNEVSDISMANSRQNIRKLVKDGFIIRKPTKIHSRSRARRMKEAKRKGRHSGHGKRKGTREARLPTKILWMRRMRVLRRLLRKYRESKKIDKHMYHDMYMKVKGNVFKNKRVLMESIHKSKAEKAREKTLSDQFEAKRAKNKASRERKHARREERLAQGPGERAPPAAEPAAVAPSQPTQGSKKSKK	1868.21	AT3G16780.1	5e-125		Ribosomal protein L19e family protein			60S ribosomal protein L19-1
LOC18768217	PRUPE_8G165600	ATGGGTGCTCTAGATCATCTCTCAGATCTCTTTGATTGCTCAGGTGGGAGTTCCAGGCACAGGAAACGCAAGCAATTCCAGACGGTGGAGATCAAGGTGAAGATGGACTGCGAAGGATGCGAGAGGAAGGTGAGGAGATCTGTGGAGGGGATGAAAGGCGTGACGCAAGTGACCGTGGAGCGCAAGGCCCACAAGCTCACAGTCGTTGGATACGTGGACCCGGGCAAGGTGCTGGCACGTGTCGCACATCGGACGGGCAAGAAGGTGGAGTTCTGGCCATACGTCCCGTACGACGTCGTTGCCCACCCGTACGCCGCTGGGGTGTACGACAAGAAGGCTCCGTCCGGGTACGTGAGGAACGTGGAGGACCCGCAGCTCCGGAACCTCGCACGTGCGAGC…	MGALDHLSDLFDCSGGSSRHRKRKQFQTVEIKVKMDCEGCERKVRRSVEGMKGVTQVTVERKAHKLTVVGYVDPGKVLARVAHRTGKKVEFWPYVPYDVVAHPYAAGVYDKKAPSGYVRNVEDPQLRNLARASSTEVRYTTAFSDENPAACAVM	435.312	AT4G38580.1	5e-90	ATFP6, HIPP26, FP6	farnesylated protein 6			heavy metal-associated isoprenylated plant protein 26
LOC18768308	PRUPE_8G064100	ATGGCTTCTATTTACCACTATGCCACTTCTTTTATAATCCTTCTCTCTCTCATCGGCCCCAACTTGGGCGCTCTGGTAGAGCAGCAGCCTCTGGTACTCAAGTACCACAACGGCGCGCTTCTCAAGGGCGACATAACCGTCAATCTCATATGGTACGGCCGCTTCACCCCGATCCAACGGTCCATCGTCGTCGACTTCGTCCAGTCCCTCAGCTCCCGGCGGGCCCCGCCCGGCTCCGCGGCGTCCTGGTGGAAAACGACGGAGAAGTACAAGAGCGGTGCCTCGAACCTCGTGGTGGGGAGGCAAGTCCTACACGAGGCCTACACTCTGGGAAAGTCCCTCGGTAACCGACACCTGCTGGCCCTCGCGGGCAAAGTCAACGCGCTTAAAGCAATAAGC…	MASIYHYATSFIILLSLIGPNLGALVEQQPLVLKYHNGALLKGDITVNLIWYGRFTPIQRSIVVDFVQSLSSRRAPPGSAASWWKTTEKYKSGASNLVVGRQVLHEAYTLGKSLGNRHLLALAGKVNALKAISVVLTASDVAVAGFCSRCGTHGSTPDKKTAYIWVGNSEAQCPGQCAWPFHQPIYGPQTPPLVAPNGDVGIDGVIINLATLLAGTVTNPYNNGYFQGPASAPLEAVSACTGVFGSGAYPGYPGRVLVDKPTGASYNAVGANGRKFLLPAMWDPQTSACKPLV	263.149	AT5G64260.1	2e-146	EXL2	EXORDIUM like 2			protein EXORDIUM-like 2
LOC18768313	PRUPE_8G262000	ATGGACCCCAATCTCCAAGTATCAGAAAACCCAGAATCTAAATCGTCAGAGGAACCAAACTCACTTGCCATTGTGCCTTCCTCATCGCTTCCTCCTTTTGCCACTGCTTCCCTCTCTCTTTCTCTCTCTACAATCCTCCCCACCCACTTTTTCCAACAACCCAAAGTTTCTACCTTGTTTTCTTCCCAGCCAAACAAGGTTAAGGTGCCCACTCAGGCCTCTTCCTTGGCTCACCTCTCTCTATCCACGGCCAATGTAACTCCTCCGAAGCTCTCATTCAAGTCCACCATCTCAGCCAACCCTCTGCAAAACCCTCTCTCTTTAGGCCCTCGCCGTCCTCTAGACCCCTCCAATGGGGCCGCAATTCGCCGAGCTTCCATTGTCTGGTTCAGAAACGAT…	MDPNLQVSENPESKSSEEPNSLAIVPSSSLPPFATASLSLSLSTILPTHFFQQPKVSTLFSSQPNKVKVPTQASSLAHLSLSTANVTPPKLSFKSTISANPLQNPLSLGPRRPLDPSNGAAIRRASIVWFRNDLRVHDNECLNSANNESMSVLPVYCFDPRDYGKSSSGFDKTGPYRASFLVESVSDLRKNLQARGSDLVVRIGKPETVLVELAKAIGADAIYAHREVSHDEVKAEDKIEAAMKEENVEVKYFWGSTLYHMDDLPFKLEEMPTNYGGFREKVKGLEVRKTIEALEQMKGLPSRGDVEPGDIPSLMDLGLNPSATMSQDGRPAANASMVGGEAEALERLKKFAAECQAQPPKSGKDGSHDSIYGANFSCKISPWLAMGCLSPRSMFDELK…	322.178	AT2G47590.1	0	PHR2	photolyase/blue-light receptor 2			blue-light photoreceptor PHR2
LOC18768314	PRUPE_8G173000	ATGGACGCTCTCTTCGTCAACCAGTGCTCCATCTCCGGCCTGAAGCTCGCCCCAAAGCTCACAACCACCCCCTTCCCTTCCCAATCTCTTCACCGCCTCAAACCCACGTCCAAGCCCAACCTCACATCCGCCTCCGTTATCCAGAACCAGCAAAGCCAATCCCTCGAAACCCAGAAACCATTTCCGTTCTCAGACGACAATGAAGACAAACCAGACGACGAGTCGTACGGCGAGGTCGACAAGATCATCGGAAGCAGAGCACTGGAGGGCGGCAAGGGCATGGAGTATTTGATTTCGTGGAAAGACGGTCATGCCCCTTCGTGGGTCCCATCGGATTTCATAGCCAAAGACGTGGTGGCGGAGTACGAGAGCCCGTGGTGGACCGCCGCCAAGAAAGCC…	MDALFVNQCSISGLKLAPKLTTTPFPSQSLHRLKPTSKPNLTSASVIQNQQSQSLETQKPFPFSDDNEDKPDDESYGEVDKIIGSRALEGGKGMEYLISWKDGHAPSWVPSDFIAKDVVAEYESPWWTAAKKADESALSQLIAAEDDWRDIDAVDGDGRTALIFVSGLGSEQCVRVLVDAGADLNHRDNGGGLTALHMAAGYVRPGVVKLLVELGADPEVEDDRGRKPLDLAKEVLKTTPQGNPMHFARRLGLESVIRELEGAIFEYAEVQELLEKRGKGDRVEYLVKWKDGGDNEWVNAKLIDEDLVRDFEAGLEYAVAEGVVGKRVGDEGTMEYLVKWTDIDEATWEPEENVDPDLIKEFEEAQNVSGPGSVEEAQLRK	268.267	AT2G47450.1	6e-140	CAO, CPSRP43	chloroplast signal recognition particle component (CAO)			signal recognition particle 43 kDa protein, chloroplastic
LOC18768318	PRUPE_8G194200	ATGGGTTCCGTTGCTGCAATGAAGGCCGTCGCCGTTCTCTTCTTCTTGTCTCTCTCCTTATTTGTTTGGGCCGACAAGGTGAAGGAAGTCAAGGAGTTGCAGATTGGTGTTAAGTATAAGCCAGAATCTTGTGAACTTCAAGCACGCAAAGGTGATAAAGTCAGGGTACACTATCGGGGGAAACTCACTGATGGAACTGTCTTTGATTCTAGTTTTGAAAGGGGCGATCCAATCTTTTTTGAGCTTGGGACTGGTCAAGTTATTAAAGGATGGGACCAAGGAATTCTGGGAATGTGCGTAGGTGAGAAGAGGAAGTTGAAAATTCCGGCAAAGCTTGGCTATGGAGAGCAGGGTTCTCCACCAACCATCCCAGGAGGCGCAACACTGATATTTGACACG…	MGSVAAMKAVAVLFFLSLSLFVWADKVKEVKELQIGVKYKPESCELQARKGDKVRVHYRGKLTDGTVFDSSFERGDPIFFELGTGQVIKGWDQGILGMCVGEKRKLKIPAKLGYGEQGSPPTIPGGATLIFDTELVEILGRGSKPNDDEL	349.829	AT3G25220.1	5e-70	FKBP15-1	FK506-binding protein 15 kD-1			peptidyl-prolyl cis-trans isomerase FKBP15-1
LOC18768326	PRUPE_8G083200	ATGTCATCTTCAACCTTCAGCGGTGATGAAACGGCGCCGTTCTTCGGCTTCCTCGGCGCTGCTGCAGCCCTCGTCTTCTCCTGTATGGGAGCTGCCTATGGAACGGCAAAGAGTGGTGTTGGTGTGGCATCTATGGGGGTGATGAGGCCTGAGCTGGTGATGAAGTCCATTGTTCCTGTTGTTATGGCTGGAGTTTTGGGTATTTATGGCCTTATTATTGCTGTTATCATTAGTACTGGAATTAACCCTAAGGCCAAGTCATACTATCTTTTTGATGGTTATGCACATCTCTCTTCTGGTCTTGCTTGTGGTCTCGCTGGGCTCTCTGCTGGAATGGCAATTGGTATAGTTGGTGATGCTGGTGTAAGAGCTAATGCACAGCAGCCAAAACTCTTTGTT…	MSSSTFSGDETAPFFGFLGAAAALVFSCMGAAYGTAKSGVGVASMGVMRPELVMKSIVPVVMAGVLGIYGLIIAVIISTGINPKAKSYYLFDGYAHLSSGLACGLAGLSAGMAIGIVGDAGVRANAQQPKLFVGMILILIFAEALALYGLIVGIILSSRSGQSRAD	867.754	AT1G75630.1	2e-109	AVA-P4	vacuolar H+-pumping ATPase 16 kDa proteolipid subunit 4			V-type proton ATPase 16 kDa proteolipid subunit
LOC18768344	PRUPE_8G129400	ATGGCGCAAGTTCAGGTCCAGGCTCAGAATGCGAACGCAGCGGCGGCGGCTGCGGCTGCGGCGAACGGTGGTGCGGCCAACCAGTTCGTGACGACGTCGCTTTATGTTGGGGATCTTGACCAGAACGTTACAGATTCGCAGCTCTACGACCTGTTTAACCAGCTGGGTCAGGTGGTTTCGGTTAGGGTTTGCAGGGACTTGTCCACCCGGAGGTCGCTTGGCTATGGCTATGTCAATTATAGCAACCCACAAGATGCTGCTAGGGCATTGGATGTTTTGAACTTCAGTCCTGTGAATGGAAGGCCCATTAGGATTATGTATTCTCATCGTGATCCTAGTATCCGCAAAAGCGGGGCTGGAAACATATTTATTAAGAATTTGGACAAAGCTATTGATCAC…	MAQVQVQAQNANAAAAAAAAANGGAANQFVTTSLYVGDLDQNVTDSQLYDLFNQLGQVVSVRVCRDLSTRRSLGYGYVNYSNPQDAARALDVLNFSPVNGRPIRIMYSHRDPSIRKSGAGNIFIKNLDKAIDHKALHDTFSAFGNILSCKVATDPSGQSKGYGFVQFDNDEAAQKAIEKLNGMLLNDKQVYVGPFLRKQERDGVSDKSRFNNVFVKNLSESTTEEDLDKIFAKFGKITSVVVMRDADGKSKCFGFVNFENTDDAARAVEDLNGKKFDDKEWYVGKAQKKSERENELKQRFEQSMKEAADKYQGANLYVKNLDDTIGDEKLKELFAPFGTITSCKVMRDPSGISRGSGFVAFSTPEEANRALLEMNGKMIVSKPLYVALAQRKEDRRARL…	1952.55	AT1G49760.2	0	PAB8	poly(A) binding protein 8			polyadenylate-binding protein 8
LOC18768371	PRUPE_8G260500	ATGGCCGGAGCCCTCTTCTCCCAGCTCTCCGACGACGTCGTTCTCAAGATTCTCTTCAAGCTCGAAGAGGACCCGCGGAACTGGGCCAGGCTCGCCTGCTCTTGCACCAAGTTCTCGTCTTTGATTCGCAACGTTTGCTGTAAGACCAAGTGCTCCAAAGCTATCCCTTCAGTCGTTTCTGATCTCCTCTCTGGCTCATCTGCGCCACCGGGCGGTTGGGCCGCGCTTCACAAGCTCGCCGTGTGCTGCCCCGGTCTCCTCCACTCCGGTGTTCTCTTTGAGAACTCCGATTTCGGCCTCGAACGCGAGGTTGGCCCCGATGAGAATTATCGGAGATTGGATTCGTCTCCGGCCGCCAAGCCCCAAACCGAGCCTTCCTCGAGCCAAATTGGTGCGAAT…	MAGALFSQLSDDVVLKILFKLEEDPRNWARLACSCTKFSSLIRNVCCKTKCSKAIPSVVSDLLSGSSAPPGGWAALHKLAVCCPGLLHSGVLFENSDFGLEREVGPDENYRRLDSSPAAKPQTEPSSSQIGANHEVGASGPNCSWSLFDDLYFDTVYDDSEAQVEAAQDQASVEKGGVRVGGEFSRCKKRKVCRSMRSHSASGVWNLSREQGNKLLHSRFRGDCLYICDWPFCVHIEEKRNYMLFRGIFKDFKGSQVWRTIRDGNRSKIDLNCAFCSCKETWDLHSAFCLRRVFGYHDDGEPVVRAYVCENGHVSGAWTDLPLYS	325.958	AT4G02440.1	2e-146	EID1	F-box family protein			phytochrome A-associated F-box protein
LOC18768414	PRUPE_8G036200	ATGTCGCACAGGAAGTTTGAGCACCCCAGGCATGGATCCCTTGGGTTTCTTCCAAGGAAGCGAGCTGCTCGTCACAGAGGCAAAGTGAAGGCTTTCCCCAAGGATGACCCATCCAAACCCTGCAAGTTGACTGCTTTTCTTGGTTACAAGGCTGGCATGACTCACATTGTCAGAGATGTCGAGAAACCCGGATCAAAGCTTCACAAGAAGGAGACGTGCGAGGCTGTAACTATTATTGAGGCTCCTCCAATGGTTGTTGTTGGAGTTGTGGGTTATGTGAAGACACCACGTGGCCTTCGCTCTCTGAACACTGTGTGGGCTCAGCATCTTAGTGAGGAGGTGAAGAGGAGGTTCTACAAGAACTGGTGCAAGTCCAAGAAGAAGGCTTTTGCAAAATAC…	MSHRKFEHPRHGSLGFLPRKRAARHRGKVKAFPKDDPSKPCKLTAFLGYKAGMTHIVRDVEKPGSKLHKKETCEAVTIIEAPPMVVVGVVGYVKTPRGLRSLNTVWAQHLSEEVKRRFYKNWCKSKKKAFAKYSKNYESEEGKKSIESQFEKLIKYATVIRVLAHTQIRKMKGLKQKKAHLMEIQVNGGTIAQKVEFAKSFFEKQIPIDAVFQKDEMIDIIGVTKGKGYEGVVTRWGVTRLPRKTHRGLRKVACIGAWHPARVSFTVARAGQNGYHHRTEMNKKIYKLGKAGQESHTAVTEFDRTEKDITPIGGFPHYGVVKDDYILIKGCCVGPKKRVVTLRQSLLKQTSRLALEDIKLKFIDTSSKFGHGRFQTTQEKQKYYGRLKA	627.71	AT1G43170.8	0	RP1	ribosomal protein 1			60S ribosomal protein L3
LOC18768433	PRUPE_8G192900	ATGGCTGTCCCTTTGCTGAAGAAGCAAATTGTGAAGAAGCGTACCAAGCACTTCAAGAGGCCCCAAAGTGACAGGAAGATATGCGTCAAGGAAAGCTGGAGAAGGCCCAAGGGTATTGATTCACGTGTCAGGCGAAAGTTTAAGGGATGTGCCTTGATGCCCAACATTGGCTATGGTTCAGACAAGAAGACTCGCCACTTTCTCCCTAATAAGTTCAAGAAATTCGTTGTGCACAATGTCAAAGAGGTTGAAATCCTAATGATGCACAACAGGACTTACTGTGCTGAGATTGCACACAATATTTCCACCAAGAAGAGAAAGGAGATCGTCGAGCGTGCAGCGCAGTTGGATGTTGTTGTTACCAACAAACTTGCCAGGCTGCGCAGCCAGGAGGATGAG…	MAVPLLKKQIVKKRTKHFKRPQSDRKICVKESWRRPKGIDSRVRRKFKGCALMPNIGYGSDKKTRHFLPNKFKKFVVHNVKEVEILMMHNRTYCAEIAHNISTKKRKEIVERAAQLDVVVTNKLARLRSQEDE	1636.2	AT4G18100.1	2e-81		Ribosomal protein L32e			60S ribosomal protein L32-1
LOC18768441	PRUPE_8G005800	ATGTCCACGCACTCAAAATCCAGTGTTTACATAGGTAATTTGGACGAGCGAGTGAGTGAGAGAGTTTTGTATGATATTCTAATTCAGGCGGGGAGGTTAGTAGACCTACACATTCCTCGGGACAAGGAAACCGACAGACCTAAAGGTTATGCTTTTGCAGAGTATGAATCTGAGGACATTGCTGAGTATGCTGTTAGGCTCTTCTCTGGTCTTGTGACTCTCTACAATCGGACACTGAAGTTTGCGATTTCTGGGCGAGACAAGCCTTCACATAATACTCCTTCCACGGTCGCATCCGCATCTAGTTTTCCTCACAAACTGAGGTCTGCTCCATCACCAATTAACAGTATGGAAATATCTCCGAATTCCATTGGTTTATCAACACCCAGAATTTCAGAC…	MSTHSKSSVYIGNLDERVSERVLYDILIQAGRLVDLHIPRDKETDRPKGYAFAEYESEDIAEYAVRLFSGLVTLYNRTLKFAISGRDKPSHNTPSTVASASSFPHKLRSAPSPINSMEISPNSIGLSTPRISDFPLNYPPVPTPPGVNKQSNGYGLPNNGNNYEYSRRVIGATLDTISRSRSRRHDMSNPISYPSY	3518.18	AT4G10110.1	2e-59		RNA-binding (RRM/RBD/RNP motifs) family protein			splicing factor 3B subunit 4
LOC18768449	PRUPE_8G261400	ATGGGTTCGGAGCTCATCTTCAGAGGGCACGAGGCCCAACACGTGGCCGACACCTACTCGCCGAAACCGCCAAAGCCATGGGCCTCTGTGACCCGCCCGATTGGGTACTTGCTCCGAGAGCAGCGCCTCGTCTTCGTGCTCGTCGGCATTGCTATAGCCACCGTCGGGTTCACGCTCCTCCCGTCCTCTCGCTCTCCTTACGTTAACGGCAACGTCCCGATCTCGAACGAGTATGTTAGGTACGACTTCGATTCGTCGACCCATTTGACGCACAAGCCCGCTTACGAGCGCCGGTTCGGGTTGACGAACTGGAATTCGGGTGGGAAGGTGCCGCTGGGGCTGAAGAGAAAGGGGCTCCGGATCGTGGTGACGGGTGGGGCCGGATTTGTCGGGTCGCAC…	MGSELIFRGHEAQHVADTYSPKPPKPWASVTRPIGYLLREQRLVFVLVGIAIATVGFTLLPSSRSPYVNGNVPISNEYVRYDFDSSTHLTHKPAYERRFGLTNWNSGGKVPLGLKRKGLRIVVTGGAGFVGSHLVDRLIERGDSVIVVDNFFTGRKENVMHHFGNPRFELIRHDVVEPLLLEVDQIYHLACPASPVHYKFNPVKTIKTNVVGTLNMLGLAKRIGARFLLTSTSEVYGDPLQHPQVETYWGNVNPIGVRSCYDEGKRTAETLTMDYHRGAGVEVRIARIFNTYGPRMCIDDGRVVSNFVAQALRKEPMTVYGDGKQTRSFQYVSDLVEGLMRLMEGEHVGPFNLGNPGEFTMLELAKVVQETIDPDAKIEYRPNTEDDPHKRKPDITKAK…	518.835	AT3G62830.2	0	UXS2, ATUXS2	NAD(P)-binding Rossmann-fold superfamily protein			UDP-glucuronic acid decarboxylase 2
LOC18768474	PRUPE_8G120800	ATGGACCCAAAATCCTCCTCAACCGAAATATCAGTCGAGTTCCCGACGATCTTCAGAATCTACAAGGATGGTCGCGTCGAAAGACTTAAAGGCACCGAAACCGTCCCGCCTTCCACCGACCCCAAAACCGGAGTCCGATCCAAAGACATCGTCCTGTCGCACGAATCCGGACTCTCCGCACGCATCTTCCTACCCAAACTCACAGACCCGACCCGGAAGCTCCCCCTCCTTGTTTTCATCCACGGCGGCGCTTTCGTCATCGAGTCCCCCTACTCTCCTCTCTACCACAACCACGCCGCTTTGCTAACATCCGAAGCAAACGTCGTTGTCTTGTCTGTGAACTATAGGCGTGCCCCCGAGCACCCACTCCCTGTTGCGTATGAAGACTCATGGGAAGCA…	MDPKSSSTEISVEFPTIFRIYKDGRVERLKGTETVPPSTDPKTGVRSKDIVLSHESGLSARIFLPKLTDPTRKLPLLVFIHGGAFVIESPYSPLYHNHAALLTSEANVVVLSVNYRRAPEHPLPVAYEDSWEALQWAAAHSNRNGPEAWLNDYVNFDRVFVGGDSAGATLTHHVVHRAGVDGLSGAKIVGMILFHPFFGNGKLDKLLEVIFPECNGLDDPRVNPGKDPKLGKIGCRRVLVFVAEKDFLRDRAWAYYESLKKSGWGGVVEILESEGEDHVFHLFNPSCDKAVALVQKVVSFINQD	372.168	AT1G47480.1	4e-90		alpha/beta-Hydrolases superfamily protein			probable carboxylesterase 5
LOC18768499	PRUPE_8G245600	ATGTCGGGGCCTCAGTGCTGTGAAAACCCACCAACCCTTAGCTCAAGCTCCGGAGCTGGTTCAGTGACTGAAATTGGAGGCTTAAAAGCCTACGTTGCTGGCCCTTCTGATTCCAAGCAGGCCATTCTTCTCGTTTCTGATGTATATGGATTTGAAGCACCAAACCTAAGGAAGCTGGCCGACAAAATAGCTAGTGCTGCTGGATTCCATGTTGTGGTTCCAGACTTCTTTTATGGAGATCCCTACGTACCGGACAATGCTGAGAGGCCTGTATCAGTTTGGATACAATCTCATGGAACAGGCAAAGGATTTGAAGATGCTAAACCTATAATTGCTGCTCTAAGGAACAAAGGGGTATCGAAGATAGGAGCAGCAGGATTCTGTTGGGGTGCCAAGGTG…	MSGPQCCENPPTLSSSSGAGSVTEIGGLKAYVAGPSDSKQAILLVSDVYGFEAPNLRKLADKIASAAGFHVVVPDFFYGDPYVPDNAERPVSVWIQSHGTGKGFEDAKPIIAALRNKGVSKIGAAGFCWGAKVVVELAKSDYIQAAVLLHPSLVTVDDIKEIKAPIAILGAEFDKISPPELLKKYEEVLSSKPEVNGYVKIFPGVPHGWTVRYKEEDEAAVKHAGEAHHDLLAWFTQHVK	380.539	AT3G23600.1	2e-115		alpha/beta-Hydrolases superfamily protein			endo-1,3;1,4-beta-D-glucanase
LOC18768509	PRUPE_8G150900	ATGAGAGAGTGCATTTCGATCCACATCGGTCAGGCTGGTATCCAGGTTGGCAATGCCTGCTGGGAGCTTTACTGCCTTGAGCATGGCATCCAGCCTGATGGCCAAATGCCTAGTGACAAGACCGTTGGTGGAGGAGATGATGCCTTCAACACCTTCTTCAGTGAAACCGGAGCTGGCAAGCATGTGCCTCGTGCAGTCTTTGTTGATCTTGAGCCCACTGTCATCGATGAAGTGAGGACTGGAACTTACCGCCAGCTCTTCCACCCTGAGCAGCTCATTAGTGGCAAGGAAGATGCTGCCAACAACTTTGCCCGTGGCCACTACACCATTGGCAAAGAGATCGTTGATCTCTGCTTGGACCGTATCCGTAAGCTTGCTGACAACTGCACTGGGCTTCAA…	MRECISIHIGQAGIQVGNACWELYCLEHGIQPDGQMPSDKTVGGGDDAFNTFFSETGAGKHVPRAVFVDLEPTVIDEVRTGTYRQLFHPEQLISGKEDAANNFARGHYTIGKEIVDLCLDRIRKLADNCTGLQGFLVFNAVGGGTGSGLGSLLLERLSVDYGKKSKLGFTVYPSPQVSTSVVEPYNSVLSTHSLLEHTDVAVLLDNEAIYDICRRSLDIERPTYTNLNRLVSQVISSLTASLRFDGALNVDVTEFQTNLVPYPRIHFMLSSYAPVISAEKAYHEQLSVAEITNSAFEPSSMMAKCDPRHGKYMACCLMYRGDVVPKDVNAAVATIKTKRTIQFVDWCPTGFKCGINYQPPTVVPGGDLAKVQRAVCMISNSTSVAEVFSRIDHKFDLMY…	4183.73	AT1G50010.1	0	TUA2	tubulin alpha-2 chain			tubulin alpha chain
LOC18768511	PRUPE_8G190400	ATGGCACAGCAAGACGTCCAGAACGGAGAAGGAGAGAAGATTGCGCCAGCTGTTGAGATCAAGGCTGTGCTGACTCAGCTGGTGGTTCCCAAGGCCGACGACGCTGTTAAGTTCTACAAGGCTGCTTTCGGTGCTGTGGAGCTCGAGCGCTCAACTCACCCCAAGCGTAAGGCGGAGCAAGAGCGCCCGTTTATCCTCTCTGCTCAGCTCAAACTCGGCTCCTCCACATTTCTCGTCTCTGACAACACTGAAGACTCCGGCGAGCCCGTGAATGTTGTGGGTTCTGGTGCCATTGCTCTCTGGCTTGAGACGCCTGACATCGGAGCTGCTGTAGCCAAGGCGGTGCTGGCCGGAGCTGTCTCTGAGGGAGAGATAACAACTGGCGTTTTCTCTGACCCG…	MAQQDVQNGEGEKIAPAVEIKAVLTQLVVPKADDAVKFYKAAFGAVELERSTHPKRKAEQERPFILSAQLKLGSSTFLVSDNTEDSGEPVNVVGSGAIALWLETPDIGAAVAKAVLAGAVSEGEITTGVFSDPDQPVGKVRDPFGFLWFFTSPVAKKAAAESEAPITV	251.046	AT5G48480.1	3e-23		Lactoylglutathione lyase / glyoxalase I family protein			uncharacterized protein At5g48480
LOC18768522	PRUPE_8G138600	ATGAAGTTCTACTTTCCACTTCTTCTTCTTCTCTGTTTTCTTCTTCTTGGCTCCTCTTTGATGGATCCAGCAATGGCTCAAGCTAAATCAAAATATTGCAGTGACAAGTGCTCAACGAGGTGTGCAGTAGCAGGAGTTCAAGATCGATGCATCAAGTATTGTGGGATATGCTGCGAAGAGTGCAAGTGTGTTCCTTCTGGGACTTATGGCAACAAGCATGAGTGCCCTTGCTACAGAGACAAGAAGAACAAGAAGGGCAAGCCCAAGTGCCCTTGA	MKFYFPLLLLLCFLLLGSSLMDPAMAQAKSKYCSDKCSTRCAVAGVQDRCIKYCGICCEECKCVPSGTYGNKHECPCYRDKKNKKGKPKCP	328.349	AT5G59845.1	4e-27		Gibberellin-regulated family protein			peamaclein-like
LOC18768538	PRUPE_8G202900	ATGGCCGGAGGCAGCAAGGTCTACACTTTAGCTGAGGTCTCTGCTCACAGTGACCGCAAAGACTGCTGGCTCCTCATTGATGGCAAGGTATATGATGTAACGAAGTTCTTGGAGGACCATCCTGGCGGTGATGAGGTCTTATTGGCAGCCACAGGAAAGGATGCAAGTAATGATTTTGAGGATGTTGGCCACAGCTCCACTGCTAGAGCAATGATGGATGAATATTATGTCGGAGACATTGATTCATCATCCATCCCCACAAAGAGGGCGTACACTCCTCCCAAGCAGCCTTACTACAACCAGGACAAGACAACCGATTTCATCATCAAAATCCTCCAGTTCCTCGTTCCCCTGCTAATTTTGGGTTTGGCTTTTGGTGTCCGCTTCTATACCAAAACT…	MAGGSKVYTLAEVSAHSDRKDCWLLIDGKVYDVTKFLEDHPGGDEVLLAATGKDASNDFEDVGHSSTARAMMDEYYVGDIDSSSIPTKRAYTPPKQPYYNQDKTTDFIIKILQFLVPLLILGLAFGVRFYTKTSTA	227.702	AT2G32720.1	3e-69	B5 #4, ATCB5-B, CB5-B	cytochrome B5 isoform B			cytochrome b5
LOC18768544	PRUPE_8G102500	ATGATTAAGCTATTTAAAGTGAAGGAAAGGCAGAGGGAGATTGCAGCAAATGCCAATGGAAAACCACCTGTTAAGAAGCAAAGTGCAGGAGAATTACGTCTTCACAGAGATATCAGTGAGCTGAACCTACAAAAAACATGTACCATATCATTTCCCAATGGCAAAGACGACTTGATGAACTTTGAGGTTACTGTTTGCCCTGATGAAGGATATTATTTAGGTGGCACATTTATGTTCACGTTTCAAGTTTCTCCTGTCTACCCTCATGAGGCGCCAAAGGTCAAGTGCAAGACAAAGGTCTACCATCCTAATATTGACTTGGAAGGAAATGTCTGCCTCAACATTCTAAGAGAAGATTGGAAACCTGTTTTGAATATCAACACTATAATATATGGACTA…	MIKLFKVKERQREIAANANGKPPVKKQSAGELRLHRDISELNLQKTCTISFPNGKDDLMNFEVTVCPDEGYYLGGTFMFTFQVSPVYPHEAPKVKCKTKVYHPNIDLEGNVCLNILREDWKPVLNINTIIYGLFHLFTQPNYEDPLNHDAAAVLRDNPKMFESNVRRAMAGGYVGQTLFPRCM	384.797	AT4G36800.2	3e-115	RCE1	RUB1 conjugating enzyme 1			NEDD8-conjugating enzyme Ubc12
LOC18768577	PRUPE_8G221500	ATGTATCTCCAGTACTACATAAACGAGAATGGCGACAAAGTCTACACCACTAAGAAAGAATCACCACTGGGGCTTCCCACTCAATCTGCCCATCCGGCCCGCTTCTCCCCTGACGACATGTATTCAAGGCAAAGATTTCTCCTGAAGAAACGCTTTGGGTTGTTGCCGATCCAGCAGTCACCTCTGAAGTATTAA	MYLQYYINENGDKVYTTKKESPLGLPTQSAHPARFSPDDMYSRQRFLLKKRFGLLPIQQSPLKY	224.018	AT2G20490.1	4e-33	NOP10, EDA27	nucleolar RNA-binding Nop10p family protein			H/ACA ribonucleoprotein complex subunit 3-like protein
LOC18768578	PRUPE_8G193400	ATGGCGAATGCATCGCCTCCTCGTCTGCTCAGTCAGAAAGAGGCTGACATCCAGATGATGCTTGCCGCTGAGGTCCATCTGGGCACCAAAAACTGTGATTTTCAGATGGAAAGATACGTCTTCAAGCGCCGTAATGATGGGATTTACATTATCAATCTCGGAAAGACATGGGACAAGCTTCAGCTGGCTGCCAGGGTGATTGTTGCGATTGAAAATCCCAAGGATATTATTGTACAATCGGCAAGGCCCTACGGTCAAAGGGCTGTTCTGAAGTTTGCTCAGCACACCGGGGCTAATGCAATTGCTGGAAGACACACCCCAGGAACCTTTACCAATCAGCTTCAGACATCTTTCAATGAGCCCCGTCTCCTCATTCTGACTGATCCAAGAACAGATCAC…	MANASPPRLLSQKEADIQMMLAAEVHLGTKNCDFQMERYVFKRRNDGIYIINLGKTWDKLQLAARVIVAIENPKDIIVQSARPYGQRAVLKFAQHTGANAIAGRHTPGTFTNQLQTSFNEPRLLILTDPRTDHQPIKEAALGNIPTIAFCDTDSPMRYVDIGIPANNKGKHSIGCLFWILARMVLQMRGSLRPGHKWDVMVDLFFYREPEEAKEKEEEEAATAADYGITDYSAAGDQWPAQVSDAPWPTDAPAAIPAAPVVSWTAEPAAADGWGEPVPGPAPVEGAPTATGWDL	583.27	AT3G04770.2	3e-154	RPSAb	40s ribosomal protein SA B			40S ribosomal protein SA
LOC18768677	PRUPE_8G112900	ATGGCAACAGCCTCAGCTACTGTGTCTCCAGCAATGTTCACCACAACCACAGTGGCCAAGCCAAGGAGGGCAGCAAACAATGTGAATTACATAACAGGGCTCAATTCATTTTCTGGGCTGAAAGCTCACAGCAGTGTGGCCTCTCTTGGCCTTCCACAGGGCACTGAGCAGTCCTTTGCAAAGATCGTGAGCTCCTTGAGAGCCCCTTCACAGGGCAAAGGCAGAGTTGGAGGAGGGGCACTCTCCTCTACCTGCAATGCTGTTGGGGAGATTTTCAAGATTGCAGCAATCATGAATGGGCTTACACTTGTTGGAGTTGCAGTAGGGTTTGTTCTTCTTCGAATCGAAGCGTCCGTGGAGGAGGCAGCTGAGGCTGAGTAA	MATASATVSPAMFTTTTVAKPRRAANNVNYITGLNSFSGLKAHSSVASLGLPQGTEQSFAKIVSSLRAPSQGKGRVGGGALSSTCNAVGEIFKIAAIMNGLTLVGVAVGFVLLRIEASVEEAAEAE	689.563	AT2G26500.1	6e-38		cytochrome b6f complex subunit (petM), putative			uncharacterized
LOC18768691	PRUPE_8G250000	ATGAGCTCCACAGCAGCAGCCACCACCAAATCAGGCAGAGGCAACGTCAGAGGCACCAAGTCGGTCTCAAGATCCCAGAAGGCCGGTCTGCAATTCCCGGTCGGTCGCGTCGCCCGGTTCCTCAAGGCCGGTCGGTACGCTCAACGAGTCGGCAGTGGCTCCCCGGTCTACCTCTCTGCTGTCCTCGAATACCTAGCTGCTGAGGTTCTGGAGTTGGCAGGGAATGCTGCGAGGGACAACAAGAAGAACAGAATCACTCCGAGACACATTCAGCTTGCAGTGAGAAATGATGAGGAGTTTACGAGGCTTTTGGGGTCTGTGACGATAGCTAATGGAGGTGTTCTGCCTAATATTCATCACAATCTGCTTCCAAAGAAGGGTGGCAAAGCAAAGGGCGAG…	MSSTAAATTKSGRGNVRGTKSVSRSQKAGLQFPVGRVARFLKAGRYAQRVGSGSPVYLSAVLEYLAAEVLELAGNAARDNKKNRITPRHIQLAVRNDEEFTRLLGSVTIANGGVLPNIHHNLLPKKGGKAKGEIGSASQEF	363.318	AT1G54690.1	4e-78	HTA3, H2AXB, G-H2AX, GAMMA-H2AX	gamma histone variant H2AX			histone H2AX
LOC18768742	PRUPE_8G138300	ATGAAAAAAAAGGGTAGGGAATACAAATTGACTCAAAGGCCCAAGTTCAATTTCAGACCCAAAGCACCAAAACGCGACGTTTTGATATTAGCATCCTCCAATACGGTCCAGAACAAAAGGAAAAATAGGCCCGCCCTCTTTTCCCCCTCTCTCCCTCTGAAATCCCATTTTTCATCTGAACGAAAGCTTCTGCAAAATCTATTCAATTCAACAATGGAGAACCGAGCGGTCCAAGAGATATTGGAGAAGCAATTGCTGACAGTAGCGAAGGCGGTGGAGGACAAGCTTGATGAGGAAATCTCAGCCCTAGATCGAGTGGATGATGACGATCTGGAGGCGCTCAGAGAGCGGAGGCTTCAGCAGATGAAGAAGATGGCGGAAAAGCGCAGCCGTTGGATC…	MKKKGREYKLTQRPKFNFRPKAPKRDVLILASSNTVQNKRKNRPALFSPSLPLKSHFSSERKLLQNLFNSTMENRAVQEILEKQLLTVAKAVEDKLDEEISALDRVDDDDLEALRERRLQQMKKMAEKRSRWISLGHGEYTEIPAEKDFFSAVKASDRVVCHFYRENWPCKVVDKHLSILAKQHMETRFVKINAEKSPFLAEKLKIVVLPTIALIKNAKVDDYVVGFDELGGKDDFSTEELEERLAKAQVIFFEGESSLKSSAKTRSVRQSSNADSSDSE	252.672	AT3G25580.1	6e-116		Thioredoxin superfamily protein			thioredoxin domain-containing protein 9 homolog
LOC18768949	PRUPE_8G267000	ATGGCAACAGCAACTGTAGCTGGAGTGAGCCTCTCAACCCCAAGAATGTTGGCCAAAGCAACCGAGACACCAAAGGCTTTCCAGCCAGCATGGCTCAGCAACCCCTGGAGAAGGTCGGGTGGCCAGCAGCTATTGGGCGGTGGCCGCATGACCATGATAAGGCCAGTGAGCGCAGCCCCAGATAAAATATCGGAGAAGGTGGCTGAAAGCATCAAGAGCGCAGAGGAGACTTGCTCAGACGACCCAGCAAGCGGGGAGTGCGTGGCAGCATGGGACGAGGTTGAGGAGCTGAGTGCTGCGGCCAGCCATGCCCGCGACAACAAGAAAACTTCCGACCCGTTGGAGACTTTCTGCAAGGACAACCCCGAAACAGACGAGTGCCGTACTTACGACAACTGA	MATATVAGVSLSTPRMLAKATETPKAFQPAWLSNPWRRSGGQQLLGGGRMTMIRPVSAAPDKISEKVAESIKSAEETCSDDPASGECVAAWDEVEELSAAASHARDNKKTSDPLETFCKDNPETDECRTYDN	1679.4	AT3G62410.1	1e-39	CP12-2, CP12	CP12 domain-containing protein 2			calvin cycle protein CP12-1, chloroplastic
LOC18769042	PRUPE_7G170800	ATGGCGAGGTACGACAGAGCCATAACGGTGTTTTCTCCTGATGGCCATCTCTTCCAAGTCGAATACGCGCTCGAAGCTGTGCGCAAGGGTAACGCCGCCGTCGGCGTACGTGGCACCGACACCATCGTTCTCGGAGTCGAAAAGAAGTCCACTGCCAAGCTCCAGGACTCCAGATCAGTGAGGAAGATCGTGAACCTGGATAATCACATTGCTCTAGCCTGTGCTGGGCTCAAAGCAGATGCTCGTGTTTTGATAAACAAGGCTAGGATTGAATGTCAAAGCCACAGGCTTACTGTTGAGGATCCAGTAACAGTTGAGTATATAACGCGTTACATTGCTGGTCTTCAGCAAAAGTACACACAAAGTGGTGGTGTGAGACCATTTGGTCTTTCAACTTTG…	MARYDRAITVFSPDGHLFQVEYALEAVRKGNAAVGVRGTDTIVLGVEKKSTAKLQDSRSVRKIVNLDNHIALACAGLKADARVLINKARIECQSHRLTVEDPVTVEYITRYIAGLQQKYTQSGGVRPFGLSTLIVGFDPYTGSPSLYQTDPSGTFSAWKANATGRNSNSIREFLEKNFKETSGQETIKLAIRALLEVVESGGKNIEVAVMTKDHGLRQLEEAEIDAIVAEIEAEKAAAEAAKKGPPRET	499.27	AT5G66140.1	6e-160	PAD2	proteasome alpha subunit D2			proteasome subunit alpha type-7
LOC18769045	PRUPE_7G202600	ATGGCATCAACCACTGCAGTTACAATGGCTATGCCATTGCCCAATGCAAGCCGAAAGAGGATCCAATCCTCCCCAGAGACCTTCTTCAAGCCACTGCCACTGAGGCCCTCAAGGGCTTTAACACCAGCAGCAGCATCAAGATCAAGTGGGAGACTTGAAGTCAGGGCTTCCCTCAAGGAGAAGGCGGTTACCGGCCTGACCGCAGCCGCGCTCACGGCCTCAATGGTGATCCCGGAGGTGGCCGAAGCCGCTTCCGGAGTCTCTCCTTCTCTCAAGAACTTCTTGCTCAGCATTGCTGCCGGCGGTGTTGTACTTGTCGTGCTCGTCGGTGCCGTAATTGGCGTGTCCAATTTCGACCCTGTCAAGAGAGGCTGA	MASTTAVTMAMPLPNASRKRIQSSPETFFKPLPLRPSRALTPAAASRSSGRLEVRASLKEKAVTGLTAAALTASMVIPEVAEAASGVSPSLKNFLLSIAAGGVVLVVLVGAVIGVSNFDPVKRG	1258.05	AT2G06520.1	1e-34	PSBX	photosystem II subunit X			uncharacterized
LOC18769057	PRUPE_7G217100	ATGAAGATCGAGGAATTGGAGGAGGCGGAGTGTGATTGGAGCGACGGCGTTTCCGGGAGGCAGATAGTTAGGGTTGATGACGCCAAGAGAGCGCTAGTCGGAGCCGGGGCTCGGATCCTTTTCTACCCGACCCTGTTATATAATGTGCTTCGGAACAAGATCGAAGCTGAGTTCAGATGGTGGGACGAAGTTGACCAGTTTGTTCTGCTCGGTGCGGTTCCATTCCCCAAAGATGTTCCCCAGTTGAAGCGACTGGGTGTTGGCGGTGTTATCACTCTCAATGAACCTTATGAAACTTTGGTTCCAACGTCCTTGTATCGTGCCCATGGAATTGACCATCTGGTAATCCCAACACGTGATTATCTCTTTGCTCCTTCATTTGAAGATATTAGCAGGGCT…	MKIEELEEAECDWSDGVSGRQIVRVDDAKRALVGAGARILFYPTLLYNVLRNKIEAEFRWWDEVDQFVLLGAVPFPKDVPQLKRLGVGGVITLNEPYETLVPTSLYRAHGIDHLVIPTRDYLFAPSFEDISRAVEFIHLNASCGRTTYVHCKAGRGRSTTIVLCYLVKHKNMTPSAALDYVRSRRPRVLLAPSQWNAVQEYSRCKPATTACSPSGDAVLITKADLEGYHGTCDDNACKQLAIVPKMVKASPMIARLSCLFASLKVSGSCGPVTRRLTVPEPRAC	621.348	AT2G35680.1	2e-101		Phosphotyrosine protein phosphatases superfamily protein			putative dual specificity protein phosphatase DSP8
LOC18769070	PRUPE_7G253600	ATGGAATTTTCTCATCGACTTACGACCTGGGTTCTGACCATTTTCTTGATATTTCAATCGGGATATGGGTGGTACCTTCCGGGTAGTTACCCTCACAAGTACGTTGTCGGGGACACCTTAGGGGTGAAAGTGAACTCTCTGACCTCCATTGATACAGAAATACCCTTTAGCTATTACAGTTTGCCCTTTTGTCAGCCCCAAGATGGGGTTAAGGACAGTGCTGAGAATCTCGGTGAGCTCCTCATGGGAGACCGCATTGAGAACTCTCCATATCAGTTTAAGATGTACACCAATGAGTCTGAGATCTTCTTGTGTCACACGGGTCCATTGTCGGGAGATCAGTTTAATCTCTTGAAGAAGAGGATTGATGAGATGTATCAGGTCAATTTGATTCTCGAT…	MEFSHRLTTWVLTIFLIFQSGYGWYLPGSYPHKYVVGDTLGVKVNSLTSIDTEIPFSYYSLPFCQPQDGVKDSAENLGELLMGDRIENSPYQFKMYTNESEIFLCHTGPLSGDQFNLLKKRIDEMYQVNLILDNLPAIRYTKKEGFVLRWTGYPVGIKVKDVYYVFNHLKFKVLVHKYEEPNVARVMGTGDGAEVIPTVAKSDSDVPGYIIVGFEVIPCSFMHNADSVKKSKMYEKYPAPIKCDPTTVAMPVNEKQPIVFTYEVEFEESDIKWPSRWDAYLKMEGSKVHWFSILNSLMVITFLAGIVLVIFLRTVRRDLTRYEELDKEAQAQMNEELSGWKLVVGDVFRAPSNASLLCIMVGDGVQILGMAVVTILFAALGFMSPASRGTLITGMLFFY…	299.408	AT5G35160.2	0		Endomembrane protein 70 protein family			transmembrane 9 superfamily member 11
LOC18769137	PRUPE_7G215600	ATGTTTACCAGGCTTTTCGGGAAACCTAAACAGGAAGGCAATGCCCTGACCACCTTAGACAAATTAAATGAGACACTTGAAATGCTAGAGAAAAAGGAAAAAGTACTACAGAAAAAGGCTGCTGCAGAAGTTGAAAGGGCCAAGGAATTCACCAGAGCAAAGAACAAAAGGGCGGCTATACAATGTTTAAAGAGGAAGAGGTTATATGAACAACAAATAGAACAGCTTGGAAATTTCCAGTTGCGTATCCATGATCAGATGATAATGCTAGAAGGTGCAAAAGCCACAACCGAAACTGTAGATGCCTTGAGAACTGGAGCAGCTGCAATGAAAGCAATGCAGAAAGCAACGAACATAGATGATGTGGACAAGACCATGGATGAGATTAATGAGCAGACA…	MFTRLFGKPKQEGNALTTLDKLNETLEMLEKKEKVLQKKAAAEVERAKEFTRAKNKRAAIQCLKRKRLYEQQIEQLGNFQLRIHDQMIMLEGAKATTETVDALRTGAAAMKAMQKATNIDDVDKTMDEINEQTENMKQIQEALSAPIGAAADFDEDELEAELEELEGAELEEQLLQPATTAPAAPVQAPAGRQPTRPIPQKRTAEEDELAALQAEMAL	221.053	AT4G29160.3	1e-113	SNF7.1	SNF7 family protein			vacuolar protein sorting-associated protein 32 homolog 2
LOC18769161	PRUPE_7G133900	ATGGCAAGCCTTTACAGAGGGGTCTCTAGGAAAGAAAAACCCAGAGGGAGACATCATGGGTTACCTACACAAAAGAAACAAGAGATCAAGGAAGCGTTCGAGTTATTCGACACCGATGGCTCAGGCACCATTGATGCCAAGGAGCTCAATGTTGCCATGAGGGCTCTCGGTTTCGAGATGACAGAAGAGCAAATCACTCAAATGATTGCAGATGTTGACAAGGATGGCAGTGGTGCTATTGACTTTGATGAATTTGTGCACATGATGACAGCCAAAATTGGGGAACGGGACACAAAGGAGGAACTCATGAAAGCCTTCCATCTCATCGACCAAGATAACAATGGTAAGATATCTGCTGCTGACATTAAAAATATTGCAAAGGATCTGGGGGAGAACTTA…	MASLYRGVSRKEKPRGRHHGLPTQKKQEIKEAFELFDTDGSGTIDAKELNVAMRALGFEMTEEQITQMIADVDKDGSGAIDFDEFVHMMTAKIGERDTKEELMKAFHLIDQDNNGKISAADIKNIAKDLGENLSDREIQEMIEEADRDRDGEVNAEEFIRMMKRTAYGY	200.339	AT3G50360.1	4e-99	ATCEN2, CEN1, CEN2	centrin2			probable calcium-binding protein CML20
LOC18769171	PRUPE_7G009800	ATGGCAGGAATCGTTCACAAGATTGGAGACGCCCTCCACATAGGAGGAGGAGGTAACGAGCACAAGAAAGACGAGGAGCACAAGAAGGAAGGTGAGCACCACAAGGACAAGAAAGACGAACACCACAAGGACAAGAAAGACGAACACCACAAGAAAGACGGCGATCACAAAGAGAAAGACAAAGACGACAAGAAGAAGAAGAAGAAGAAGGACAAGAAGAAGGATGGCCATGACAGCAGCAGCAGCGACAGCGACTAA	MAGIVHKIGDALHIGGGGNEHKKDEEHKKEGEHHKDKKDEHHKDKKDEHHKKDGDHKEKDKDDKKKKKKKDKKKDGHDSSSSDSD	6773.27							dehydrin HIRD11
LOC18769175	PRUPE_7G221700	ATGTTAGGACATCCTTGCAAAAGGAAAAGGGAAAAAACAAAAACATTCATTGTTAGCTTTCTTTCTTGTGTTGTGGTCTTGGAGACTTGGGAGTTCTTGCAAAACAGAATGGCGAATGAGAAACAATTGAAATGGGAAGGCAAGGCTAGTGCGGAGCTCAATGGCCCAGAAGCAGAACAAGTGTGGCCTCTTTTGGAGGACTTCTTTGGCCTGCACAAGTGGTTCCCAACTCTCACAACTTGCCTTGGTGTTGAAGGCATATCAGGGCAACCCGGTTGTGTGCGCTACTGCGCTGGGTTCAAGACTCCTGTTGACCATAAGAGAGAGCAAGACCAAGACCAAGAGAAGGTGAATTGGACCAAGCAGAAGCTGCTTTCTATAGACCCAGCACAACTGATA…	MLGHPCKRKREKTKTFIVSFLSCVVVLETWEFLQNRMANEKQLKWEGKASAELNGPEAEQVWPLLEDFFGLHKWFPTLTTCLGVEGISGQPGCVRYCAGFKTPVDHKREQDQDQEKVNWTKQKLLSIDPAQLIFSYSIIDGNVGFNSYISTVQVVPKEGGCSIVWKYEVEPVEGWKMEDLDMFIGTGLQVMASRMEASLQLQVGPLEP	469.802	AT4G32870.1	2e-41		Polyketide cyclase/dehydrase and lipid transport superfamily protein			lachrymatory-factor synthase
LOC18769176	PRUPE_7G267900	ATGGATAGAGGCCACGTCTTGGCAATTCCTTATCCTGCTCAAGGCCACATAAACCCCTTGCTCCAGTTCTCCAAGCGCTTAGCCTCTAAGGGCCTCAAAGTCACTGTAGCCAACACCATATTCATCAGCAAGTCATTGCCGCTCAAATCAAGCGGCTCCGTCCAATTCGACACCATATCCGATGGCTACGATGAGGAAGGCTTTGCCCGAGCTGAAAGCATCGCTGCTTATCTAGACCGGATGGAAGCCGAGGGCTCCAGAACCCTAATCGAGCTCATTACAAAGTACAACAACTCACCCCACCCTATTAATTGCATAATATATGATCCATTTTTGCCCTGGGCTCTGGATGTAGCCAAACAGTTTGATCTAGCGTCCGCTGCCTTTTTTACTCAAACC…	MDRGHVLAIPYPAQGHINPLLQFSKRLASKGLKVTVANTIFISKSLPLKSSGSVQFDTISDGYDEEGFARAESIAAYLDRMEAEGSRTLIELITKYNNSPHPINCIIYDPFLPWALDVAKQFDLASAAFFTQTCTVNYIYYMQYHGGDVTSIPGLHMLEPQDLPSFFSVPGSYPAYREMVLNQYSNLHKADFIFANSFYKLEQQVVDSMSKVCRMLTIGPTIPYTYLDNRIEDDKEYGVQLYKIDSVCSDWLNSKPPGSVIYVAFGSMANLSHKQMEELALGLKGSGFYFLWVVRGSEEAKLPPNFIEELELERSTSTSEDGGKGKGLIVTWSPQLEVLSNEAVGCFFTHGGWNSTIEALSLGVPMIVMPQWTDQPTNSKLVQDVWKVGVRVKVDHHHD…	209.142	AT2G43820.1	2e-179	GT, UGT74F2, ATSAGT1, SGT1, SAGT1	UDP-glucosyltransferase 74F2			UDP-glycosyltransferase 74F2
LOC18769177	PRUPE_7G214600	ATGGCTACCGTTCCAGGACAATTGATCTGGGAGGTCGTGAAGAAGAACAACTCCTTCTTGGTGAAGCAGTTCGGCCGAGGCAACGCTGGCGTCCGATTCAGCAAGGAGCCCAACAACCTCTACAACCTCCACTCCTACAAGCATTCTGGCTTGGCGAACAAGAAGACGGTGACTATTCAGCCCGGAGGCAAAGACCATTCTGTGGTGCTCGCCACCACTAAGACGAAGAAGCAGAACAAGCCTGCCAGTTTGCTTCACAAGTCTGTGATCAGGAAGGAGTTTCCTCGTGTGGCCAAGGCTGTTATCAATCAGGTGGCGGATAATTTCTATAGACCCGATTTGAAGAAAGCAGCCCTTGCCAGGCTTAGTGTTGTTCACAGGAGTCTCAAGGTCTCCAAG…	MATVPGQLIWEVVKKNNSFLVKQFGRGNAGVRFSKEPNNLYNLHSYKHSGLANKKTVTIQPGGKDHSVVLATTKTKKQNKPASLLHKSVIRKEFPRVAKAVINQVADNFYRPDLKKAALARLSVVHRSLKVSKSGVKKRNRQAVKTPGRK	912.002	AT2G19730.3	1e-75		Ribosomal L28e protein family			60S ribosomal protein L28-1
LOC18769200	PRUPE_7G115700	ATGATGCAGACAGAGCAGGCTCAGCCACAGCAGCAGCAGCAGCAGCTGGTGGTGCAGAACTCAGCTGGAAGCCTCAGTTTCAACAGCAATCTCTCCAAGGAGGATGAAGAGATGTCAAGGTCGGCTCTTTCCACTTTCAGAGCCAAAGAGGAGGAGATCGAGAGGAAGAAGATGGAGGTCAGAGAAAAGGTTCAAGCCCAGTTGGGTCGTGTTGAAGAGGAGACCAAGCGTTTGGCCACTATTCGTGAGGAGCTTGAAGGCCTTGCAGATCCAATGAGGAAGGAAGTTTCACAGGTCCGTAAGAAGATCGATTCAATTAACAAAGAGTTAAAGCCACTAGGACACACCTGCCAGAAGAAGGAAAAAGAATACAGAGACGCGCTTGAGGCTTTCAATGAA…	MMQTEQAQPQQQQQQLVVQNSAGSLSFNSNLSKEDEEMSRSALSTFRAKEEEIERKKMEVREKVQAQLGRVEEETKRLATIREELEGLADPMRKEVSQVRKKIDSINKELKPLGHTCQKKEKEYRDALEAFNEKNREKVQLITKLMELVSESEKLRMKKLEELSKNVDSLQ	369.107	AT3G09980.1	7e-80		Family of unknown function (DUF662)			uncharacterized
LOC18769215	PRUPE_7G099300	ATGGGCCGCGTCCGTACAAAGACTGTGAAGAAATCCTCGCGCCAAGTGATTGAGCGATACTACTCGCGCATGACCCTGGACTTCCACATCAACAAGAAGATCCTGGAGGAGGTGGCCATCATCCCCTCCAAGAGGCTCCGCAACAAGATTGCCGGGTTCTCGACCCATTTGATGAAGCGGATCCAGAAGGGCCCTGTTCGCGGCATCTCCTTGAAGCTCCAGGAGGAGGAGCGCGAGCGCCGCATGGACTACGTCCCCGAGAAGTCCGCCATCAAGACTGACGAGATCGAGGTCGACAAGGAGACGATCGACATGCTCTCTGCTCTCGGCATGGGCGATATGCCCGGCCTCAAGCGGGTCGACCCGGCTTCTCTTCAGCCCCAGCAGCTCGGGTTCGGG…	MGRVRTKTVKKSSRQVIERYYSRMTLDFHINKKILEEVAIIPSKRLRNKIAGFSTHLMKRIQKGPVRGISLKLQEEERERRMDYVPEKSAIKTDEIEVDKETIDMLSALGMGDMPGLKRVDPASLQPQQLGFGRGGPRRY	483.053	AT5G04800.4	9e-77		Ribosomal S17 family protein			40S ribosomal protein S17-2
LOC18769239	PRUPE_7G172700	ATGTCGTCGTCGTCGAAGAAGATCACCCTGAAGAGCTCTGATGGCGAATCGTTCGAGGTTGAAGAAGCGGTGGCTCTTGAGTCGCAGACCATCAAGCATATGATCGAGGACGATTGCGCCGACAACGGCATTCCTCTGCCCAACGTGACGAGCAAGATCTTGGCCAAGGTCATCGAGTACTGCAAGAAGCACGTCGACGCTGCCAAGCCTGATGAGAAGATCTCCGAGGATGATCTCAAGGCTTGGGATCAGGACTTTGTCAAAGTTGACCAGGCAACCCTATTTGATCTCATTCTGGCTGCAAACTACTTGAACATCAAGCTCCTGCTGGACCTGACATGCCAGACTGTTGCGGACATGATCAAGGGGAAGACCCCGGAGGAGATCCGAAAGACCTTC…	MSSSSKKITLKSSDGESFEVEEAVALESQTIKHMIEDDCADNGIPLPNVTSKILAKVIEYCKKHVDAAKPDEKISEDDLKAWDQDFVKVDQATLFDLILAANYLNIKLLLDLTCQTVADMIKGKTPEEIRKTFNIKNDFTPEEEEEVRRENQWAFE	624.553	AT1G75950.1	3e-85	SKP1, ASK1, ATSKP1, SKP1A, UIP1	S phase kinase-associated protein 1			SKP1-like protein 1A
LOC18769244	PRUPE_7G194800	ATGTCGAGTTCATCGGAGACTCTGGAGGTTTCAGGGCAAAGAGGGTTGAGGATGGCGGAGAAGCCATCGAGCTTCACTCAGACTTGTAGCATGCTCTGCCAGTACCTCAAAGAGAAGGGCAGCTTTGGAGATCTGAGCCTTGACATGGCATGCAACATGCAACAATCCAACGGGACAGGGACACCTGAGATGTTTCATCAGAAAGCCCCACCCGTGAATTTCTTTCCATTTATGGAAAACTCAAGGAACCTGCCAGCAACTCCTGGAGACTTTAAATCCATGGATTTGTTCCCTCAACAAGCTGGTTTTGGTTCCTCAGTTCCCAGAGGAGATGTTCCCAAGATGGCTGATTCTAGTGTGAAGAAATCTGTCCCAGGAGAGCCTCAAAAGGCACAAATG…	MSSSSETLEVSGQRGLRMAEKPSSFTQTCSMLCQYLKEKGSFGDLSLDMACNMQQSNGTGTPEMFHQKAPPVNFFPFMENSRNLPATPGDFKSMDLFPQQAGFGSSVPRGDVPKMADSSVKKSVPGEPQKAQMTIFYGGQVIVFDDFPADKAKEVMLLASKESSHSQAAQASIPAKSNNVFASHLGKNPMNSSSSVPPSANMFPKFGNQVIQEAPKPSPQPIVCDLPIARKASLHRFLEKRKDRINNKAPYQTSSPAAGPAKPAEGKSWLGLAAQPTQ	299.552	AT1G19180.1	3e-56	JAZ1, TIFY10A	jasmonate-zim-domain protein 1			protein TIFY 10A
LOC18769295	PRUPE_7G118700	ATGGCTACGATCCAGACCGTCAAGGCAAGGCAGATCTTCGACAGCCGTGGCAATCCCACCGTCGAGGTGGACATTGTTCTGTCAGACGGGACTTTGGCTAGAGCTGCTGTTCCAAGTGGTGCATCCACTGGAGTTTACGAGGCCCTTGAGTTGCGTGATGGAGGATCAGACTACCTTGGAAAGGGTGTCTCAAAGGCTGTCAACAATGTGAACTCAATCATTGGACCTGCTTTGATTGGCAAGGACCCAAGTGAACAGACTGCTATTGACAACTTCATGGTTCAACAACTCGATGGAACTGTTAATGAGTGGGGTTGGTGCAAACAAAAGCTTGGTGCAAATGCCATCTTGGCAGTGTCTCTTGCAGTTGCCAAAGCTGGGGCTAGCGTCAAGAAAATT…	MATIQTVKARQIFDSRGNPTVEVDIVLSDGTLARAAVPSGASTGVYEALELRDGGSDYLGKGVSKAVNNVNSIIGPALIGKDPSEQTAIDNFMVQQLDGTVNEWGWCKQKLGANAILAVSLAVAKAGASVKKIPLYKHIANLAGNKNLVLPVPAFNVINGGSHAGNKLAMQEFMILPVGASSFKEAMKMGVEVYHHLKAVIKKKYGQDATNVGDEGGFAPNIQENKEGLELLKTAIEKAGYTGKVVIGMDVAASEFYGSDQTYDLNFKEEKNDGSQKISGNALKDLYKSFVSEYPIVSIEDPFDQDDWEHYAKMTAECGEQVQIVGDDLLVTNPKRVEKAIKEKSCNALLLKVNQIGSVTESIEAVRMSKKAGWGVMASHRSGETEDTFIADLSVGLAT…	737.974	AT2G36530.1	0	LOS2, ENO2	Enolase			enolase
LOC18769323	PRUPE_7G221100	ATGATCTCCTTCAAAAGAACCCACTCACCCAAATCAATCATATCATTCATCTCCACCACCTCCACATGCATATTAAACAAGAAAGTTTCACACTTCTCCTCCGTAGTTGCAGCACAAAAACAGATCACTGCATCTTCTGCTTCTTCTCTCACTACTGGCTTTGATCTCCAGCGATCACTCTGTTTTCTGTGTTGTAATTGTAACAGAAAGAGTGTTGCTGATCCTCAGCTGTTAATTGGTTCACTTAGAAGAATGGAGAGCACCTTCAATGAGTTGGGGGATAAGGCTTCTGTGCTCGACTTTGACCCCAAATCTGCCGATGTTGGTGGCGGCGTTGAGGACATCTACGGTGAGGACACTGCCACGGAGGACCAGCTTGTCACCCCTTGGACTTACTCC…	MISFKRTHSPKSIISFISTTSTCILNKKVSHFSSVVAAQKQITASSASSLTTGFDLQRSLCFLCCNCNRKSVADPQLLIGSLRRMESTFNELGDKASVLDFDPKSADVGGGVEDIYGEDTATEDQLVTPWTYSVASGYSLLRDPQYNKGLAFTEKERDTHYLRGLLPPATCSQQLQEKKLMNNIRQYQVPLQKYMALTELQERNERLFYKLLIDNVEELLPIVYTPTVGEACQKFGSIFRRPQGLYISLKEKGKVLEVLKNWPERTVQVIVVTDGERILGLGDLGCQGMGIPVGKLALYTALGGVRPSACLPITIDVGTNNKQLLEDEFYIGLRQKRTTGKEYADLLDEFMSAVKQNYGEKVLIQFEDFANHNAFQLLEKYRRTHLVFNDDIQGTAAVV…	620.965	AT2G19900.1	0	ATNADP-ME1, NADP-ME1	NADP-malic enzyme 1			NADP-dependent malic enzyme
LOC18769397	PRUPE_7G214000	ATGGCATCGAAGTTGCGCCAGTTGCAATCTAAGGCTTGTCAAGCAACACAGTTTGTGTCCAAGCATGGAAGTACCTACTACAAGAATTTGTTAGAGCAGAACAAGCAATACATTCAGCATCCACCAACAGTTGAGAAGTGCAATGAGCTGTCAAAGCAATTGTTTTATACTCGACTTGCTAGTATTCCTGGCCGTACCGAATCATTCTGGAAGGAAGTTGATTACATCAAGCATTTGTGGAAGAACAGGCAGGACCTGAAGGTTGAAGATGCTGGCATTGCTGCTTTGTTTGGGCTGGAGTGCTTTGCATGGTTTTGTGCTGGTGAGATTGTGGGAAGGGGATTTACCTTCACTGGTTACTATCCTTGA	MASKLRQLQSKACQATQFVSKHGSTYYKNLLEQNKQYIQHPPTVEKCNELSKQLFYTRLASIPGRTESFWKEVDYIKHLWKNRQDLKVEDAGIAALFGLECFAWFCAGEIVGRGFTFTGYYP	1318.8	AT4G26210.2	7e-75		Mitochondrial ATP synthase subunit G protein			uncharacterized
LOC18769419	PRUPE_7G010500	ATGAGACTCTTGACCAAATTTGACCCGTTGGCCGTACTTGATTCGAGTTTGAACATTCTTTTAGGGTTGAGGGTTGTTTCAAAGTTTCCATTTGGAAAATTCCTTATTGCCTTATACTGGGTTTTACAGTACGGAGTACACTCGATTTCTGCCTTTCCTCAGCCACGCTCCAAAATGAGTCGGCACCCGGAGGTTCTGTGGGCCCAGCGCTCCGATAAGGTGTACCTAACGGTGGCGTTACCTGACGCCAAAGACATCAACATCAAGTGTGAGCCTCAGGGCTCCTTCAGCTTCTCCGCCATTGGAGTCCAAGGCGAGCCCTTTCACTTCACTTTGGACCTTTACGGACCAATAACGCCTGATGGTTGTAAAACTAAAGCTGGGTTGAGGAACATCCTC…	MRLLTKFDPLAVLDSSLNILLGLRVVSKFPFGKFLIALYWVLQYGVHSISAFPQPRSKMSRHPEVLWAQRSDKVYLTVALPDAKDINIKCEPQGSFSFSAIGVQGEPFHFTLDLYGPITPDGCKTKAGLRNILCSIQKDQNGWWKRLLKTEEKPAPYIKVDWNKWCDEDEEDTTSDLASDDDNAAYVGQDGGSSDDDGMLYLPDLEKARK	417.565	AT3G03773.1	2e-74		HSP20-like chaperones superfamily protein			uncharacterized protein At3g03773
LOC18769450	PRUPE_7G118600	ATGGCGGAGCACTTAGCATCCATCTTCGGCACAGAGAAGGACCGTGTCAACTGTCCCTTCTACTTCAAGATCGGTGCTTGCAGGCATGGCGACCGATGCTCTCGCCTCCACACCAAGCCCAGCATCAGCCCCACCCTTCTGCTTTCCAACATGTACCAGCGGCCCGATATGCTCACCAACCCCGGCGTCGACCCCCAGGGCCAAGCCTTAGACCCTCGAAAGATCCAAGACAACTTCGAGGATTTTTATGAGGATCTGTTTGAGGAGCTGAGCAAGTATGGACAGATCGAGAGCTTGAATATCTGTGATAATTTGGCTGACCACATGGTTGGTAATGTGTACGTTCAGTTCAGGGAGGAAGAACATGCTCAAGCTGCGCTTCAGAATCTCACTGGGAGG…	MAEHLASIFGTEKDRVNCPFYFKIGACRHGDRCSRLHTKPSISPTLLLSNMYQRPDMLTNPGVDPQGQALDPRKIQDNFEDFYEDLFEELSKYGQIESLNICDNLADHMVGNVYVQFREEEHAQAALQNLTGRFYAGRPIIVDFSPVTDFREATCRQYEENVCNRGGYCNFMHLKKISRELRRRLFGRNRRRHSRSRSRSRSPQRHHRGGYQERPHGGRGFGRRGGGGGDDDRDHRFHDKARRPRSRSPGRRGRSRSPVGTGGKRNRSPPARESSAERRAKIEQWNREREQVDSGSKYDNNNNNNSNDDEWNGYAENSDQYYEDPQQQQQ	253.437	AT5G42820.1	3e-121	ATU2AF35B, U2AF35B	Zinc finger C-x8-C-x5-C-x3-H type family protein			splicing factor U2af small subunit B
LOC18769468	PRUPE_7G175000	ATGAAGATGAAGCAAATAGAGGAGGCACCGGCGTCACCGCCTCCACCACCACCACCACTTCCAAGGTTCTGGGCTAAGAAGGCTGCGCCGGAGAGTGTGACAAAGCGAGAAATTGCCAGGTTCTGGTTTCAGAAGCGCATTGAGGAAGAGGAGCACCTCCTCGCTGCTATCAAGGCTGCAGCACGTATTAGAGCCCTCAAGCTCTCGGAGGAAGATTACAGACGTTTTGAGGAGTCCTTGGACAACGACGACGACAAAGCCAATGGTAAGGATAGCTCTGCTGCAGCCACTAATGACAGCAACAAGGATGGAAAGAACGACGAAGTTCGTGTTGGGATTAAGGACTGGTGGACAAAGAGCAAGTATGCATACTTGAACCAGCCAGCCATAGAGTCCATG…	MKMKQIEEAPASPPPPPPPLPRFWAKKAAPESVTKREIARFWFQKRIEEEEHLLAAIKAAARIRALKLSEEDYRRFEESLDNDDDKANGKDSSAAATNDSNKDGKNDEVRVGIKDWWTKSKYAYLNQPAIESMEPPKRRTSAYVPNCFAYKPTPLYPTSLGVF	367.528	AT2G17710.1	3e-41		unknown protein; Has 39 Blast hits to 39 proteins in 14 species: Archae - 0; Bacteria - 0; Metazoa - 0; Fungi - 0; Plants - 39; Viruses - 0; Other Eukaryotes - 0 (source: NCBI BLink).			uncharacterized
LOC18769475	PRUPE_7G217200	ATGGAGAAGTGGTGGCTTCTAGCTCTTCTCCTACTGAGTGTAATTCCTATAGAAGCTGGATTTGGAGTGGGTGGTGGTGTTGGTGTTAATGTTGGCCCTGTTGCTGGGGGTGGGGGAGCTGGAGTTTGGATTGGTGGAGGTATCAACGGAAATGGCCCAAATGCCCCACCTGGATCTTCAGCTTCAGGGCTTGACAGAGCTTACACTGCTCTGCAGGCATGGAAATCAGCCATCTCTGAAGACCCATCAAAAATTTTAGACACTTGGGTTGGCTCTGATGTGTGTTCTTACAAAGGGGTCTTTTGTGCAGATTCTCAATATGAAGTTTCTGCAGCCTCTGGCCCTGTTGTTGCTGGTATAGATCTCAACCATGCCAATCTCCAAGGCACTCTTGTCAAA…	MEKWWLLALLLLSVIPIEAGFGVGGGVGVNVGPVAGGGGAGVWIGGGINGNGPNAPPGSSASGLDRAYTALQAWKSAISEDPSKILDTWVGSDVCSYKGVFCADSQYEVSAASGPVVAGIDLNHANLQGTLVKELSFLTEMSLLHLNSNRFSGTIPDTFKDLTSLQELDLSNNHFSGSFPTVTLYIPNLIYLDLRFNSFSGPIPEDLFNRRLDAIFLNNNQFAGGLPESLGNSQASVINLANNKFSGNFPASFGFMSNKLKEILFLNNQLTGCIPEGVGLFTDIQVFDVSFNSLMGHLPDTISCLQDIEVLNLGHNKLSGVLPEMVCSLKSLLNLTVAYNFFSGFSQECAKLFYRNVGFDFSLNCIPGRNMQRPQPECSLIPGGGLNCLRIPGSKPLVC…	258.796	AT4G29240.1	9e-164		Leucine-rich repeat (LRR) family protein			leucine-rich repeat extensin-like protein 4
LOC18769480	PRUPE_7G098800	ATGACGCTAGGTTCAGGAGGATCGGGTGTCGTGGTCCCACGAAACTTCAGATTGCTGGAGGAACTTGAACGTGGAGAGAAAGGTATTGGGGATGGCACTGTCAGCTATGGAATGGATGACGGAGATGACATCTACATGCGTTCTTGGACTGGTACCATCATTGGTCCCCACAATACCGTACATGAAGGTCGAATCTATCAGTTGAAGCTGTTCTGTGATAAAGATTACCCTGAGAAGCCACCAAGTGTTCGTTTTCATTCACGGATTAACATGACTTGTGTTAACCATGAAACTGGAGTGGTGGAACCGAAGAAATTTGGACCTCTTGCGAACTGGCAGCGAGAGTACACCATGGAGGATATACTTACACAGCTGAAAAAGGAGATGGCATCCCCACAT…	MTLGSGGSGVVVPRNFRLLEELERGEKGIGDGTVSYGMDDGDDIYMRSWTGTIIGPHNTVHEGRIYQLKLFCDKDYPEKPPSVRFHSRINMTCVNHETGVVEPKKFGPLANWQREYTMEDILTQLKKEMASPHNRKLVQPPEGTYF	1195.53	AT3G52560.1	6e-100	UEV1D-4, MMZ4, UEV1D	ubiquitin E2 variant 1D-4			ubiquitin-conjugating enzyme E2 variant 1D
LOC18769481	PRUPE_7G269800	ATGGCGGAGCCAATAATGATACCCAGCCTCCCGGGGAATCCAAACCCTAATTACCAGGGCCTACCAACTGCAAGTGTTGATCTTCCTCCTCCTCCTCCTCCTCCGTCTCCACCAGCCACAGGAGGTTCGAGGAGCCCCGTCATATTCAGCTTCCCGAAAAGGCCTTCTATTCGACTCACTTCCGAGTTCGACAGCGACTCGTCCGTTTTCTTCCATAAGGTCTCGTGCAAGCTGTTTGACAGCCTGGCCAAACTGAAGCTCTCCTTCCACAACAACCACAAGGGCGAGCTCTCTCCGCCCCACTTGGCACTTGTCTCCAAGCACCTCTCCATTAACTACGACTTTGAAGATCAATCTACTCTCCTCAGCGGCTCCGTCGATGTTGGTCCTCGATTGCAA…	MAEPIMIPSLPGNPNPNYQGLPTASVDLPPPPPPPSPPATGGSRSPVIFSFPKRPSIRLTSEFDSDSSVFFHKVSCKLFDSLAKLKLSFHNNHKGELSPPHLALVSKHLSINYDFEDQSTLLSGSVDVGPRLQLRATHDLKAQQGEASVVAKLAEPGYAFELSSPVPSVGFPKATLKFPLGEVSLEEKEEEETKRMLSINGIVKGQILNGLCTAHYADEDLKLRYSYKDEEMSFIPTFSLPSNALSFAFKRRFGPSDKLSYWYNFDSDYWSAVYKHTYGKDLKLKAGYDSEVRLGWASLWVGDEGGKARTAPMKMKVQFMLQVPQDDIRSSTLMFRVKKRWDI	214.595	AT2G43950.1	1e-152	OEP37, ATOEP37	chloroplast outer envelope protein 37			outer envelope pore protein 37, chloroplastic
LOC18769510	PRUPE_7G187000	ATGGCCGTTCGTCGGCGACCGCCAAACCCCTCCTCCCCCGGCGAACCCGCTAAATCCCAGAAGCAAAACCTCAAGGCCTCCGACGCGCTTCCTCTGCCGCTCTACCTCACCAACGGCCTCTTCTTCACGCTCTTCTTCACCGTCGCCTACTTCCTCCTCCACAGGTGGCGCGAGAAGATCCGCACGTCCACGCCGCTCCATGTGCTGACGCTCTCGGAGATCGCCGCCCTCTTCTCCCTCTTCGCCTCTGTCATCTACCTCCTCGGCTTCTTCGGCATTGACTTCGTCCAGTCTTTCGTCTCCCCTAACAACGCCCGCGCCCCCCACGACCCCTGGAATGACGTCGTCGCCGTCGAACAACAACCAAAAAATGACGTCGTACGAGTCGCACCCCTCTCC…	MAVRRRPPNPSSPGEPAKSQKQNLKASDALPLPLYLTNGLFFTLFFTVAYFLLHRWREKIRTSTPLHVLTLSEIAALFSLFASVIYLLGFFGIDFVQSFVSPNNARAPHDPWNDVVAVEQQPKNDVVRVAPLSAAGGGESSEEDEDIIKSVMSGTTPSYSLEASLGDCRRAAAIRREALQRTTCRSLEGLPLEGFDYESILGQCCEMPVGYVQIPVGVAGPLLLDGEEFTVPMATTEGCLVASTNRGCKAIHVSGGAQSVVLKDGMTRAPVVRFSSAARAAELKFFVEDPLNFDSLAVVFNRSSRFARLQRIQCAIAGKNLYMRFTCSTGDAMGMNMVSKGVQNVLDFLQSDFPDMDIVGISGNFCSDKKPAAVNWIEGRGKSVVCEAVIREEVVRKVL…	827.954	AT1G76490.1	0	HMG1, HMGR1, AtHMGR1	hydroxy methylglutaryl CoA reductase 1			3-hydroxy-3-methylglutaryl-coenzyme A reductase 3
LOC18769564	PRUPE_7G102700	ATGTCGAGAAGGAAGACCAGGGAGCCCAAGGAGGAAAATGTCACTCTCGGACCTGCTCTCCGAGATGGAGAGCATGCTTTTGGTGTTGCTCATATTTTTGCCTCATTTAATGATACATTCATTCATGTAACTGACCTGTCTGGAAGGGAGACACTTGTTCGCATCACTGGTGGTATGAAGGTGAAAGCTGATAGAGATGAATCATCGCCATATGCAGCCATGCTTGCGGCTCAGGATGTTTCTCAACGGTGCAAGGAGCTTGGCATTACTGCTTTACATATAAAGCTCCGGGCTACTGGAGGGAACAAGACTAAGACTCCTGGTCCTGGTGCCCAATCAGCACTCAGAGCCCTGGCTCGTTCTGGCATGAGAATTGGTCGTATTGAGGATGTGACTCCA…	MSRRKTREPKEENVTLGPALRDGEHAFGVAHIFASFNDTFIHVTDLSGRETLVRITGGMKVKADRDESSPYAAMLAAQDVSQRCKELGITALHIKLRATGGNKTKTPGPGAQSALRALARSGMRIGRIEDVTPIPTDSTRRKGGRRGRRL	315.481	AT3G52580.1	7e-92		Ribosomal protein S11 family protein			40S ribosomal protein S14-3
LOC18769583	PRUPE_7G097100	ATGTCGTACAAGGACTGCGGCCAACACGGATACAACAAGCGGCGAAGGAGGTTTAAACGCTGCTGCGCCGGGCTCCTAATCTTCAACTTCATCCTGCTCGTCACCATCCTCATCGTGTGGGCCATCCTCCAGCCCTCCAAACCCCGCTTCATCCTCCAAGACGTCACCGTCTTCAACTTCAACAACTCCGTACCCAACGTCTTCTCCTCCAGCTTCCAGGTCACCGTCTCCTCCCGCAACCCCAACGACAAGATCGGCATCTACTACGACAGGCTCAACATCTACGCGACATACCGTAATCAGCAGATCACCTTCTCCACGCTCATCCCGCCGGTGTACCAGGGTCACAAGGACGTCAACGTCTGGTCGCCGTTCATCTACGGCACCGAAGTCCCCATC…	MSYKDCGQHGYNKRRRRFKRCCAGLLIFNFILLVTILIVWAILQPSKPRFILQDVTVFNFNNSVPNVFSSSFQVTVSSRNPNDKIGIYYDRLNIYATYRNQQITFSTLIPPVYQGHKDVNVWSPFIYGTEVPIAPYNSLALDQDKNAGSVFLLLKMDGRVRWKVGTFISGRYHFYVRCPAFIPLGPKNNGVVVGNNAIKYQLLQHCKVSV	679.469	AT3G11660.1	9e-96	NHL1	NDR1/HIN1-like 1			NDR1/HIN1-like protein 1
LOC18769630	PRUPE_7G225600	ATGTCTATGTCACTGGAGCATGATTACATAGGCTTATCAGAGTCTGCTTCTTCAATGGAAAGCTCTGACAAGTCTGCTGAGAGGGACAGAGGGACTGCTCTGAACCTCAAAGCCACTGAGCTGAGGCTGGGCTTGCCAGGCTCTGAGTCCCCAGACAGAGATTGTGGTGGTGGGTTAGTGGAGGATAAGACTGGGTACTCAGTATGTGTGGTTAAAGGCTTGGTCTCTGGGGCCAAGAGGGGCTTCTCTGACGCCATTGATGGAGCTTCCGGGAAGTGGATTTTCTCTGGGAGTGGTGGATCTGAGGTTGATATGGGTAAAGGTGGTAACTTGCTCTCTCCCAGAGGTGTTAATGGTGGGAAAGCTCTTGCTGGGTCTGAGTCTAACAACCAACCAACA…	MSMSLEHDYIGLSESASSMESSDKSAERDRGTALNLKATELRLGLPGSESPDRDCGGGLVEDKTGYSVCVVKGLVSGAKRGFSDAIDGASGKWIFSGSGGSEVDMGKGGNLLSPRGVNGGKALAGSESNNQPTSLAVSAVKDGGQQSPKPLHEKKPQVSASASAAKAQVVGWPPIRSFRKNSMASVPPRNDDDAEGKMGPGCLYVKVSMDGAPYLRKVDLKTYGSYVELSLALEKMFSCFTIGQCGSHGVSRDGLSESRLMDLLNGAEYVLTYEDKDGDWMLVGDVPWEMFTDTCKRMRIMKSSEAIGLAPRAMQKCKKSN	733.333	AT4G29080.1	6e-111	PAP2, IAA27	phytochrome-associated protein 2			auxin-responsive protein IAA27
LOC18769639	PRUPE_7G182700	ATGGGGAAATCCAGAGCTGCTGCTCCTAAAAGAACCGAGACCAAGTTAAAGACCAAAAGTGCTGGAGCGAGTAAGAGGACATCGAAGAAGGCCGGAAAGGATCCAAACAAGCCAAAGAGACCTGCGAGCGCCTTCTTCGTTTTCATGGAGGATTTCAGGGAGAAGTACAAGAAGGAACATCCTAACAACAAATCTGTCGCTGCTGTCGGTAAGGCTGGTGGTGACAAATGGAAATCATTGTCAGATGCTGAGAAAGCTCCCTACGTAGCCAAGGCAGAGAAGAGGAAGACTGAATATAACAAGACCATGCAGGCCTACAACAAGAGTATTGCTGAGGGAGGCAATGGAGCAGAGGAGGAAGAATCTGATAAGTCCAAGTCTGAGGTGAATAACGAAGAA…	MGKSRAAAPKRTETKLKTKSAGASKRTSKKAGKDPNKPKRPASAFFVFMEDFREKYKKEHPNNKSVAAVGKAGGDKWKSLSDAEKAPYVAKAEKRKTEYNKTMQAYNKSIAEGGNGAEEEESDKSKSEVNNEEEEDDESAEDEDDDE	948.023	AT1G20693.2	5e-51	HMGB2, HMG BETA 1, NFD2, NFD02	high mobility group B2			HMG1/2-like protein
LOC18769641	PRUPE_7G145900	ATGGCAGCCTCACTCCAAGCAGCTGCTACTCTTATGCAGCCCACCAAGGTGGGCGCGCCGGCAAGGACCAGCCTTCAGCTCAGGCCCTCCCAGAATGTCTCCAAGGCCTTTGGCTTGGAACCATCTGCCTCTGCTAGGCTCACTTGCTCTCTGCAGTCTGATCTCAAGGACTTTGCTCACAAGTGTGTTGATGCCTCTAAGATTGCTGGCTTTGCTCTTGCTACTTCTGCCCTCGTCGTCTCGGGAGCAGGTGCAGAGGGAGTTCCAAAGAGGCTGACCTTTGATGAAATCCAGAGCAAGACATACTTGGAAGTGAAGGGGACAGGAACTGCAAACCAATGCCCAACCATTGATGGAGGGTTAGAAGCATTCGCCTTCAAGCCGGGCAAGTACACCGCC…	MAASLQAAATLMQPTKVGAPARTSLQLRPSQNVSKAFGLEPSASARLTCSLQSDLKDFAHKCVDASKIAGFALATSALVVSGAGAEGVPKRLTFDEIQSKTYLEVKGTGTANQCPTIDGGLEAFAFKPGKYTAKKFCLEPTSFTVKAESVNKNAPPEFQNTKLMTRLTYTLDEIEGPFEVSPDGTLKFEEKDGIDYAAVTVQLPGGERVPFLFTIKQLVASGKPENFGGEFLVPSYRGSSFLDPKGRGGSTGYDNAIALPAGGRGDEEELAKENIKNTASSKGKITLSVTKSKPESGELIGVFESIQPSDTDLGAKTPKDVKIQGVWYAQLD	569.302	AT3G50820.1	0	PSBO2, PSBO-2, OEC33	photosystem II subunit O-2			oxygen-evolving enhancer protein 1, chloroplastic
LOC18769659	PRUPE_7G164900	ATGGCAACGACGTCGTTCTTGACGCCGACGCAGAGGTACGCCGCCGGAGCTCTGTTTGCGTTCGCTCTTCACCAGGCTCAGATCCACCAGACCCATCCCCTGCGATTGTCCTCTGGAGAAGAAGAATCAACCGAGGAGCGGACCAGTAGTGTCAGCAGCGCCGACTCCGTCTCCGACGGCCCGGAGCTTTGGGTCCATGAAAACTCGGGTCTCCTCCCACCCGTTTTCAGGTTTCTGGAGATTGATTCTGCAGCCTGGTCCGGACTTCAGGAAAGCGCTGCTACTTCTCCTGCTAGCCATCATGTTGGAGCATTCTTGAGGTTGCTTGCTGAAGAAGGTGATGATGGTGATAAGGATGGTTCACAAAGTGCAGATCAAGAACTTGCTTTGTCCAGAACT…	MATTSFLTPTQRYAAGALFAFALHQAQIHQTHPLRLSSGEEESTEERTSSVSSADSVSDGPELWVHENSGLLPPVFRFLEIDSAAWSGLQESAATSPASHHVGAFLRLLAEEGDDGDKDGSQSADQELALSRTVDAMALSMEKTSESSQSKKEKHREYENECREKFSTAEVKKNIEAADEHLESPQEKRSTAEVKQKIEEEDVQLENLMQKCSTADVTQNSEGVGALLENQQDTGGNLVSAKDALAASSEIREKTFGELTMLSYQRKVTVLYELLSACLADKREDNKKCTRRRKGYDARHRLALRLLATWLDVKWMKMEAIETMVACSAMASVKKEEEKEETQSPKNKWAKWKRGGIIGAAAITGGTLLTITGGLAAPAIAAGLGALAPTLGTLIPIIG…	303.809	AT4G36210.3	0		Protein of unknown function (DUF726)			transmembrane and coiled-coil domain-containing protein 4
LOC18769708	PRUPE_7G259600	ATGGCGAAGAAAACCATGGATGTGGTGAAGGGTCTGGATTTGCAGAGGTACATGGGGCGCTGGTACGAGATAGCCTCATTTCCGTCAAGGTTTCAGCCCAAGAACGGAGAGAACACGAGGGCTACCTACACTCTGAGAGATGATGGGACTGTGAACGTGCTCAATGAGACTTGGTCTGATGGAAAAAGAAGCTCCATAGAGGGCACTGCATACAAGGCCGACCCCTCCAGCGAAGAGGCCAAACTCAAAGTGAAATTCTACGTTCCTCCATTTTTGCCCATCATCCCTGTTGTTGGTGATTACTGGGTTTTGTTTATTGATGAGGATTATCAGTATGCTTTGATTGGCCAGCCTAGCAGGAATTACCTTTGGATATTAAGCAGGCAGCCTCGTCTTGAT…	MAKKTMDVVKGLDLQRYMGRWYEIASFPSRFQPKNGENTRATYTLRDDGTVNVLNETWSDGKRSSIEGTAYKADPSSEEAKLKVKFYVPPFLPIIPVVGDYWVLFIDEDYQYALIGQPSRNYLWILSRQPRLDDEIYNQLVQRAKDEEYDVSKLHKTPQSETPPEGEEGPKDTKGIWWFKSLLGK	1798.84	AT5G58070.1	2e-103	ATTIL, TIL	temperature-induced lipocalin			temperature-induced lipocalin-1
LOC18769717	PRUPE_7G092600	ATGGCGGTTGTTGGCCCATGGACGACGAGGAGCTTGATCATCGCGATAATGATGATGACCACGACGGTGCGTTTAATTGACGGCAGCAACAACAACCACGTGTACTCTCCGTGCGCGGACACGAAGGTGGAGAGGTCCGACGGGTTCACCTTCGGGATTGCCTTCGCATCCAGGGACTCCTTCTTCCGAAACGGCAGCGTTCAGCTGTCTCCCTGCGACTCCAGACTCTCTCTCTCCAACGGCAATTCCCAGATCTCCGTTTTCCGCCCCAAGGTTGACGAGATCTCTCTCCTCTCTGTCAACTCCTCCTCCTTCACTGCGGATTCTTATGGCTATATGGTTGCATTTGCTGGGAGAAAATATGCTGCAAGGTCCATTCCTGCTTTTGTTGCCAATGCT…	MAVVGPWTTRSLIIAIMMMTTTVRLIDGSNNNHVYSPCADTKVERSDGFTFGIAFASRDSFFRNGSVQLSPCDSRLSLSNGNSQISVFRPKVDEISLLSVNSSSFTADSYGYMVAFAGRKYAARSIPAFVANATYTVTSFTLVLEFNKGRLQNLYWKRDGCSKCSGSTGLVCLNNQDCAFKTSSCKTHGGSVDCSLGIQLAFSGTDKHLSVLNSWYEVENLRQYSLYGLYSNLKGSLTSQFDKIF	218.565	AT3G44150.1	9e-122		unknown protein; FUNCTIONS IN: molecular_function unknown; INVOLVED IN: biological_process unknown; LOCATED IN: plasma membrane; EXPRESSED IN: cultured cell; BEST Arabidopsis thaliana protein match is: unknown protein (TAIR:AT3G11800.1); Has 76 Blast hits to 75 proteins in 19 species: Archae - 0; Bacteria - 0; Metazoa - 0; Fungi - 0; Plants - 74; Viruses - 0; Other Eukaryotes - 2 (source: NCBI BL…			uncharacterized
LOC18769718	PRUPE_7G076500	ATGGGTGCCGGTGGAAGAATGTCCGCACCCCCTACCCGTAAGAACGCTGAAACCGACAACCCCAAGCGAGTGCCATACTCAAAACCTCCATTCAGTCTCGGCCAGATCAAGAAAGCCATCCCACCTCATTGCTTTCAGCGCTCTGTTATCCGCTCCTTCTCCTATGTCTTTTATGACCTTACCATTGCCTTTCTCCTGTACTACATTGCTTGCAATTACATCCAGCCTCTCTCTCAACCTTTCTCTTTCTTGGCGTGGCCAGTTTACTGGTATGTTCAGGGCTGTGTCCTGACTGGTGTTTGGGTGATAGCGCATGAGTGTGGTCACCATGCTTTTAGTGATTATCAATGGCTGGATGACACAGTCGGTCTAATCCTCCACTCTGCCCTCCTTGTGCCT…	MGAGGRMSAPPTRKNAETDNPKRVPYSKPPFSLGQIKKAIPPHCFQRSVIRSFSYVFYDLTIAFLLYYIACNYIQPLSQPFSFLAWPVYWYVQGCVLTGVWVIAHECGHHAFSDYQWLDDTVGLILHSALLVPYFSWKYSHRRHHSNTGSIERDEVFVPKQKSAIGWYSKYLNNPPGRFLTLTIQLTLGWPLYLAFNVSGRHYEGFACHYHPYGPIFSDRERLQIFLSDAGVLAVVYGLYRLAVAKGLAWVVCYYGGPLMVVNGFLVLITYLQHTHPSLPHYDSSEWDWLRGALATVDRDYGILNKVFHNITDTHVAHHLFSTMPHYHAMEATKAIKPILGDYYQLDRTPVFKAMFREAKECIYVERDEGDKKGVFWYNNKL	457.078	AT3G12120.2	0	FAD2	fatty acid desaturase 2			delta(12)-fatty-acid desaturase FAD2
LOC18769724	PRUPE_7G012500	ATGTATACGGGAGGGAAGGCAGTTGATTCGAAAGAGGGTGGTGGAGGAGGAAGCGGAAAACAGGGTTCATGGGGTGGTCTGAATAGTTTGATAAGGAGGAAACAGGTGGACTCGGTTCACGTGAAGTCTGGGGGTCAACAGTTGGCCAAGGAGTTGACTATTCCCCATCTTGTTGCAATTGGAGTTGGCTCGACGATCGGAGCAGGAGTCTATATTCTTGTTGGAACAGTGGCTAGGGAGCACTCTGGACCAGCCCTGGCAATTTCCTTTCTAATAGCTGGAATAGCTGCAGCTCTTTCAGCCTTTTGTTATGCTGAGCTTGCAAGTCGCTGCCCTTCTGCTGGGAGCGCCTATCACTATACGTACATATGCATTGGAGAAGGTGTTGCTTGGTTGGTC…	MYTGGKAVDSKEGGGGGSGKQGSWGGLNSLIRRKQVDSVHVKSGGQQLAKELTIPHLVAIGVGSTIGAGVYILVGTVAREHSGPALAISFLIAGIAAALSAFCYAELASRCPSAGSAYHYTYICIGEGVAWLVGWALILEYTIGGSAVARGISPNLALLFGGEDSLPAFIARQYIPALDMVVDPCAAILVFIVTGLLCVGIKESTVAQGIVTIANVCAMIFVIVAGTYLGFKTGWAGYELPTGYFPFGVNGMLAGSATVFFAYIGFDTVASAAEEVKNPQRDLPLGIGAALSICCALYMLVSIVIVGLVPYHAMDPDTPISTAFASHGMQWAAYVITAGAVTALCSTLMGSILPQPRILMAMARDGLLPSFFSDINKRTQVPVKSTIATGIGAAVLAFF…	278.025	AT1G58030.1	0	CAT2	cationic amino acid transporter 2			cationic amino acid transporter 2, vacuolar
LOC18769742	PRUPE_7G022800	ATGAGCAGCATTGGAACAGGTTACGATCTCTCCGTCACCACATTTTCTCCTGATGGCCGCGTCTTCCAGATCGAGTACGCCGCCAAAGCCGTTGACAACTCCGGGACTGTTATTGGGATCAAATGTAAGGACGGCGTTGTTATGGGTGTTGAAAAGCTTATAGCGTCGAAGATGATGTTGCCAGGTTCCAATAGAAGGATTCATTCTGTTCATCGCCACTCCGGCATGGCAGTTGCTGGATTAGCAGCAGATGGAAGGCAAATTGTTGCCAGGACCAAGTCTGAAGCTAACAACTATGAAAGTGTGTATGGTGAACAGATTCCTGTTAAGGAACTTGCCGAACGTGTTGCTAGCTATGTGCATTTGTGTACGCTATATTGGTGGCTCAGACCTTTTGGA…	MSSIGTGYDLSVTTFSPDGRVFQIEYAAKAVDNSGTVIGIKCKDGVVMGVEKLIASKMMLPGSNRRIHSVHRHSGMAVAGLAADGRQIVARTKSEANNYESVYGEQIPVKELAERVASYVHLCTLYWWLRPFGCGIILGGYDRDGPQLYMVEPSGISYRYFGAAIGKGRQAAKTEIEKLKLSELTCRQGVIEVAKIIYGIHDEAKDKDFELEMSWVCDESNRQHQKVPDELLEEAKAAARAALEEMDAD	334.329	AT2G27020.1	1e-170	PAG1	20S proteasome alpha subunit G1			proteasome subunit alpha type-3
LOC18769753	PRUPE_7G207300	ATGAGCAACGACAAGGATAGCATGAACATGTCTGATCTCGCCGCTGCTCTGAACGAAGAGGATCGAGCAGGCCTCGTTAACGCTCTCAAGAATAAGATACAGAGTTTGGCCGGGCAGCACTCTGATATCCTCGAGAGTCTCTCTCCTGTAGTCAGAAAGCGTGTTGATGTTCTTAGAGAAATCCAGACCCAACATGATGAATTAGAAGCAAAGTTTTTTGAGGAGAGAGCAGCCCTAGAAGCCAAGTATCAGAAATTGTACCAGCCTTTGTATAGCAAGAGATACGAGATCGTAAATGGTGTTGTTGAAGCTGAAGGAGCTACTACTGAAGCAGCAAATCAAGAGGATAACGCTGCTGAGGAGAAAGGAGTGCCTGATTTCTGGCTCAATGCAATGAAA…	MSNDKDSMNMSDLAAALNEEDRAGLVNALKNKIQSLAGQHSDILESLSPVVRKRVDVLREIQTQHDELEAKFFEERAALEAKYQKLYQPLYSKRYEIVNGVVEAEGATTEAANQEDNAAEEKGVPDFWLNAMKNNEVLAEEITERDEGALKYLRDIKWFRIDNPKGFKLEFYFDTNPFFKNSVLTKIYHMIDEDEPILEKAIGTEIEWYPAKCLTQKLLKKKPKKGSKNAKPITRTENCESFFNFFSPPQVPEDDEDIEEDAAEELQNQMEQDYDIGSTIRDKIIPHAVSWFTGEAIQGDDFGDLEDDEDDDIEDQDDDDEDEDEDEDDDEDDEDEDEGKTKKKKSGRAQLADGQQGERPPECKQQ	374.703	AT2G19480.3	2e-176	NAP1;2	nucleosome assembly protein 1;2			nucleosome assembly protein 1;2
LOC18769754	PRUPE_7G114800	ATGGCCGCGAAGAACTTCAAGTACGTGATCCTCGGCGGTGGAGTCTCAGCTGGATATGCAGCTCGGGAGTTTGCCAAACAAGGGCTTAAGCCAGGCGAACTAGCAGTCATTTCCAAAGAGGCGGTAGCTCCATACGAACGTCCTGCACTCAGCAAGGCTTATCTCTTCCCCGAGTCTCCTGCTAGACTTCCTGGGTTTCATGTTTGTGTTGGAAGTGGAGGAGAGAGATTGCTTCCCGAGTGGTACAAAGAGAATGGGATAGAATTGATTCTTAGCACTGAAATAGTTAAAGTCGATCTTGCTGGGAAGACTCTTGTCAGTGGAAATGGGGAATCCTTCAAGTATCAGACTCTGGTCGTTTCCACTGGATCAACTGTTATAAGATTGACAGATTTTGGT…	MAAKNFKYVILGGGVSAGYAAREFAKQGLKPGELAVISKEAVAPYERPALSKAYLFPESPARLPGFHVCVGSGGERLLPEWYKENGIELILSTEIVKVDLAGKTLVSGNGESFKYQTLVVSTGSTVIRLTDFGVKGAEAKNIFYLREIDDADKLNEAIKSKKNGKAVIVGGGYIGLELGAALRINNLDVKMVYPEPWCMPRLFTSGIAAFYEGYYANKGIKIIKGTVAVGFTANSDGEVKEVHLKDGTVLEADIVVVGVGGRPLTTLFKGQVEEEKGGIKTDAFFKTSVPDVYAVGDVATFPLKLYNEIRRVEHVDHARKSAEQAVKAIKASEEGKTIEEYDYLPFFYSRSFDLSWQFYGDNVGETVLFGDNNPTSPKPKFGTYWIKDGKVVGAFLEGG…	480.805	AT3G52880.1	0	ATMDAR1, MDAR1	monodehydroascorbate reductase 1			monodehydroascorbate reductase
LOC18769756	PRUPE_7G244100	ATGGTGACGACTCTCAACGCCTCCGTGACAACTTGGATCCGTCACTTACTCGCTTGCATGGGTGGTTGTTTTGGATGCTGCACTAAACCCACACCAATTATTGCCGTCGATGAGCCGTCCAAGGGATTGAGAATTCAAGGTCGAACTGTTAAGAAACCTGGTATCTCAGATGATTTTTGGAGCAGCAGTACATACGACTTGGACAATAGTGCTCTTCAATCCCAGAGAAGCATCTCATCCATCAGCACCTCCAACCAGACCCTCACCCATGGCAGTGTGGCTGGTAGCACAAGCAGCCAGTCTGACTTTGTAAATAATGGTCTTGTTCTCTGGAACCAGACCAGGCTTGAGTGGATTGGAAGTGGCAAGCCTAGAAATCATACTCCAACAAGTCGGGAA…	MVTTLNASVTTWIRHLLACMGGCFGCCTKPTPIIAVDEPSKGLRIQGRTVKKPGISDDFWSSSTYDLDNSALQSQRSISSISTSNQTLTHGSVAGSTSSQSDFVNNGLVLWNQTRLEWIGSGKPRNHTPTSRESRLSWNSTYERLVGTKQRQSFTQRIPLSDMIDFLVEVWEQEGLYD	315.673	AT5G25360.2	5e-57		unknown protein; FUNCTIONS IN: molecular_function unknown; INVOLVED IN: biological_process unknown; LOCATED IN: cellular_component unknown; EXPRESSED IN: 23 plant structures; EXPRESSED DURING: 15 growth stages; BEST Arabidopsis thaliana protein match is: unknown protein (TAIR:AT4G32342.1).			uncharacterized
LOC18769762	PRUPE_7G102800	ATGCAGATTTTCGTGAAAACCCTAACCGGGAAGACCATCACTCTCGAGGTCGAGAGCAGCGACACCATCGACAATGTCAAGGCCAAGATCCAAGACAAGGAGGGAATTCCACCAGACCAGCAGCGTTTGATTTTTGCTGGCAAGCAGCTTGAAGATGGCCGCACCTTGGCTGACTATAACATCCAGAAAGAATCAACTCTTCATCTTGTTCTGAGGCTCCGTGGAGGTATTATTGAGCCTTCTTTGATGGCTTTGGCTCGCAAATACAACCAGGACAAAATGATTTGCAGAAAATGTTATGCTCGGCTGCATCCAAGGGCAGTGAACTGTAGGAAGAAGAAGTGTGGCCACAGCAACCAGTTGAGGCCAAAGAAGAAGGTCAAATAG	MQIFVKTLTGKTITLEVESSDTIDNVKAKIQDKEGIPPDQQRLIFAGKQLEDGRTLADYNIQKESTLHLVLRLRGGIIEPSLMALARKYNQDKMICRKCYARLHPRAVNCRKKKCGHSNQLRPKKKVK	809.729	AT3G52590.1	3e-90	UBQ1, EMB2167, ERD16, HAP4	ubiquitin extension protein 1			ubiquitin-60S ribosomal protein L40
LOC18769767	PRUPE_7G260700	ATGGCTGGTACTGGATTGTTTTCAGAGATATTGGATGGAGAGGCTTACAAGTACTACGCTGATGGAGAGTGGAAGAAATCATCTTCTGGGAAACTCGTTCCCATCATCAACCCAACTACAAGAAAGGTTCACTACAAGGTTCAAGCTTGTACACAAGAAGAGGTCAACAAGGTTATGGAAACTGCGAAAATTGCACAGAAGTCGTGGGCAAAGACTCCACTCTGGAAGCGAGCTGAGCTTCTTCATAAAGCTGCTTCTATCCTGAAAGAGTACAAAACTCCAATTGCAGAATCCCTTGTTAAAGAAATTGCTAAACCTGCTAAAGATGCAGTTACAGAGGTTGTGAGGTCTGGGGATTTGGTGTCTTACTGTGCTGAAGAAGGGGTTAGGATTCTGGGA…	MAGTGLFSEILDGEAYKYYADGEWKKSSSGKLVPIINPTTRKVHYKVQACTQEEVNKVMETAKIAQKSWAKTPLWKRAELLHKAASILKEYKTPIAESLVKEIAKPAKDAVTEVVRSGDLVSYCAEEGVRILGEGKFLVSDSFPGNDRTKYCLTSKIPLGVVLAIPPFNYPVNLAVSKIAPALIAGNSLVLKPPTQGAVSCLHMVHCFHLAGFPKGLISCVTGKGSEIGDFLTMHPGVSCISFTGGDTGIAISKKAGMIPLQMELGGKDACIVLEDADLDLVAANIIKGGFSYSGQRCTAVKVVLVMESVADALVEKVNKRVAKLTVGPPEENSDITPVVSESSANFIEGLVVDAKQKGATFCQEYKRDGNLIWPLLLDNVRPDMRIAWEEPFGPVLPV…	264.871	AT2G24270.3	0	ALDH11A3	aldehyde dehydrogenase 11A3			NADP-dependent glyceraldehyde-3-phosphate dehydrogenase
LOC18769861	PRUPE_7G024500	ATGGAAAGCCAACAGCACAAGGAGAAGAAGATGAAGATACTTTGCCTCCATGGATTTAGAACCAGTGGGAGCTTTCTGCAAAAGCAAATTAGCAAATGGGATGCTTCTATCTTCTCTCAGTTTGACTTGGATTTTCCAGATGGTATATTTCCTGCTGGAGGAAAATCCGATATAGAAGGCATCTTCCCACCACCTTACTACGAGTGGTTTCAATTTGACAAGGACTTCACAGAGTACACAAACTTGGAAGAATGCATCACTTATTTATGTGACTACATAACAAGCAAAGGTCCTTTTGATGGTTTGCTTGGTTTTTCCCAGGGTGCAACACTATCAGGACTCTTGTTGGGCTACCAAGCTCAGGGAAAGCTGTTGAAGGAGCATCCACCTTTCAAGTTT…	MESQQHKEKKMKILCLHGFRTSGSFLQKQISKWDASIFSQFDLDFPDGIFPAGGKSDIEGIFPPPYYEWFQFDKDFTEYTNLEECITYLCDYITSKGPFDGLLGFSQGATLSGLLLGYQAQGKLLKEHPPFKFFISISGAKFRDPKICDIAYKDTIKAKSVHFIGAKDWLKLPSEDLASEFDNPLIIRHPQGHMVPRLDEAATEQLRGWTAAIIQCNGTISDGKHELENGDANEKHNGTDLIQCDNAKLDSKHELDNGEAKQKHNGADLIQCDNAKLDSKHELENGEAKENFGADPVVSAMKNQSQETRTAGEIKTNEREV	259.609	AT4G24380.1	1e-70		INVOLVED IN: 10-formyltetrahydrofolate biosynthetic process, folic acid and derivative biosynthetic process; EXPRESSED IN: 24 plant structures; EXPRESSED DURING: 15 growth stages; CONTAINS InterPro DOMAIN/s: Serine hydrolase (InterPro:IPR005645); BEST Arabidopsis thaliana protein match is: alpha/beta-Hydrolases superfamily protein (TAIR:AT5G65400.1); Has 30201 Blast hits to 17322 proteins in 780 …			dihydrofolate reductase
LOC18769912	PRUPE_7G161700	ATGGCCAAGCACTCCGTCGGGTGGGTCGCGTCGCAGAAGCGCTGGCTCTTGGCCTTTCTCGTCATGCTCTCCGTCTCCACCTTGATCGCCTTCTTCATCAGAGCCGCCTTCGATTCCTGCGACCGTCGCATGGATGTAGTCGACAAGAGGGTTCCTTTGGGCTCTCCCATTGGGACCAGTCCTAGCCCCCTCAGCTTCATGAAGTCCAAGCTCGTGCTGTTAGTCTCGCACGAGCTCTCTCTTTCTGGTGGACCTTTGTTGTTGATGGAGCTAGCATTTTTATTAAGAGGTGTTGGCACTGAAGTTTGTTGGGTTACAACCATGAAACCATCAGATGCAGATGTAGTGATATACAGTTTGGAACATAAAATGTTGGACCGAGGGGTGCAGGTCCTCTCT…	MAKHSVGWVASQKRWLLAFLVMLSVSTLIAFFIRAAFDSCDRRMDVVDKRVPLGSPIGTSPSPLSFMKSKLVLLVSHELSLSGGPLLLMELAFLLRGVGTEVCWVTTMKPSDADVVIYSLEHKMLDRGVQVLSENGQEAVYTALKADLVVLNTAVSGKWLDVVLKENVPRVLPKVLWWIHEMRGHYFKLDYVKHLPLVAGSMIDSHVTAEYWENRTRERLGIKMPETFVVHLGNSKELMEVAEDSVAKRVLREHVRESLGVRREDLLFAIINSVSRGKGQDLFLRSFYESLRLIQEKKLQLPRMHAVIVGSDMTAHTKFEHELRNFVSMKKIQDHVHFVDKTLTVAPYLAAIDVLVQNSQARGECFGRITIEAMAFQLPVLGTAAGGTTEIVVNGTTGL…	291.707	AT1G75420.1	0		UDP-Glycosyltransferase superfamily protein			uncharacterized
LOC18769922	PRUPE_7G121200	ATGGTTCTCAAGACCGAACTCTGTCGTTTTAGCGGGGCCAAGATTTACCCAGGAAAGGGCATCAGATTTATTCGTTCTGATTCTCAGGTCTTCCTGTTTGCCAACTCAAAATGCAAAAGGTACTTCCACAACAGGTTGAAGCCATCAAAGCTTACCTGGACAGCCATGTACAGGAAGCAGCACAAAAAGGATATTGCTCAAGAAGCTGTGAAGAAGAGGAGACGTACCACCAAGAAGCCTTACTCAAGGTCTATTGTGGGTGCTACACTTGAGGTTATCCAGAAGAGGAGAACTGAGAAGCCCGAGGTTCGTGATGCTGCAAGGGAAGCTGCTCTCCGTGAAATCAAGGAGAGGATCAAGAAAACCAAGGATGAAAAGAAGGCCAAGAAGGCAGAAGTT…	MVLKTELCRFSGAKIYPGKGIRFIRSDSQVFLFANSKCKRYFHNRLKPSKLTWTAMYRKQHKKDIAQEAVKKRRRTTKKPYSRSIVGATLEVIQKRRTEKPEVRDAAREAALREIKERIKKTKDEKKAKKAEVTKSQKSQGKGSVTRGGAQPKGPKLGGGGGKR	1113.87	AT2G36620.1	3e-81	RPL24A	ribosomal protein L24			60S ribosomal protein L24
LOC18770026	PRUPE_7G190300	ATGGCTTCTCATAATCCATTGCCTGCTGGGAAGCAACTGCTTTTGTTAGTCTTATTGTGTGCTTTTTTCAGCAGCAGCTTCATCCCATTTGCTAGCTGCAGCATCACAGATGATTTACAGACACAGTGTTTGAAGGTGTCTGCTACAGAATTTGCAGGCTCTTTGAAGGACACCATTGATGCTGTGCAACAGGTGGCCTCCATTCTCTCTCAGTTTGCAAATGCTTTCGGAGATTTTCGGCTTGCCAACGCCATTTCCGACTGCCTTGATTTGCTTGACTTCTCTGCTGATGAGTTGAACTGGTCTCTCTCTGCTTCCCAGAATCAGAAGGGCAAAAATAACAGCACTGGGAAGCTAAGTTCTGATCTGAGGACATGGTTGAGCGCTGCCCTTGTTAAC…	MASHNPLPAGKQLLLLVLLCAFFSSSFIPFASCSITDDLQTQCLKVSATEFAGSLKDTIDAVQQVASILSQFANAFGDFRLANAISDCLDLLDFSADELNWSLSASQNQKGKNNSTGKLSSDLRTWLSAALVNQDTCSNGFEGTNSIVQGLISAGLGQVTSLVQELLTQVHPNSNQQGPNGQIPSWVKTKDRKLLQADGVSVDAIVAQDGTGNFTNVTDAVLAAPDYSMRRYVIYIKRGTYRENVEIKKKKWNLMMIGDGMDATIISGNRSFVDGWTTFRSATFAVSGRGFIARDITFENTAGPEKHQAVALRSDSDLSVFYRCNIRGYQDTLYTHTMRQFYRDCKISGTVDFIFGDATVVFQNCQILAKKGLPNQKNSITAQGRKDPNEPTGISIQFC…	243.583	AT3G43270.1	0		Plant invertase/pectin methylesterase inhibitor superfamily			pectinesterase/pectinesterase inhibitor PPE8B
LOC18770050	PRUPE_7G022500	ATGGCAGCAGAGATGGCTCTTGTAAAGCCCAAGTTTGCTCCAAAAATGGCAGCAGAGATGGCTCTTGTAAAACCCATCACCAATTTCAACAATGTGAGCCCAAAATTCGGAAGCAGCAGAGCTTGCTCATATAACAAGTTGAGCAGCACAATAAGAATGTCTGCAACTGCACAGCCCACAGCCAAAAAGTCCCCAAAGAAAGCCATCAAGGAGACCCTTTTGGCACCAAGGTTCTACACCACTGACTTTGATGAGATGGAGACCCTTTTCAACACTGAGATCAACAAGAACCTCAACCAGGCTGAGTTTGAGGCTCTGCTTCAGGAGTTCAAGACTGACTACAACCAGACCCACTTTGTGAGGAACAAGGAGTTCAAGGAGGCTGCTGATAAGCTCCAA…	MAAEMALVKPKFAPKMAAEMALVKPITNFNNVSPKFGSSRACSYNKLSSTIRMSATAQPTAKKSPKKAIKETLLAPRFYTTDFDEMETLFNTEINKNLNQAEFEALLQEFKTDYNQTHFVRNKEFKEAADKLQGPLRQIFVEFLERSCTAEFSGFLLYKELGRRLKKTNPVVAEIFSLMSRDEARHAGFLNKGLSDFNLALDLGFLTKARKYTFFKPKFIFYATYLSEKIGYWRYITIYRHLKENPEYQCYPIFKYFENWCQDENRHGDFFSALMKAQPQFLNDWKAKLWSRFFCLSVYVTMYLNDCQRTAFYEGIGLNTKEFDMHVIIETNRTTARIFPAVLDVENPEFKRKLDRMVEINQKLIAVGESDDIPLVKNLKRIPMVAALASELLAAYLMP…	292.616	AT3G56940.1	0	CRD1, CHL27, ACSF	dicarboxylate diiron protein, putative (Crd1)			magnesium-protoporphyrin IX monomethyl ester [oxidative] cyclase, chloroplastic
LOC18770057	PRUPE_7G157300	ATGGAGGGACCAGGAAGTGAAGGAGCAGCAGCGGCACCGCTGGCTCAATGGAGGAGCGATTTTTCGAGAGCATTCCAGTACTATTTGGATCGGTCAACGCCTCACACTGTTAATCGGTGGCTAGGAACCCTTGCTGTGGCAATGATTTACATTCTGCGTGTGTACTATGTTCAAGGGTTCTATGTTATCTCCTATGGCCTGGGGATCTATGTCTTGAATCTCTTGATAGGCTTTTTCTCACCGAAGGTGGACCCGGAGCTTGAAGCCTTGGATGGGGCTTCATTGCCAACAAAAGGTGCTGATGAGTTTAGGCCTTTTGTTCGCCGCCTTCCCGAGTTTAAGTTCTGGTATTCCATCACAAAGGCATTTATTGTTGCATTTATGTTGACCTTCATTTCT…	MEGPGSEGAAAAPLAQWRSDFSRAFQYYLDRSTPHTVNRWLGTLAVAMIYILRVYYVQGFYVISYGLGIYVLNLLIGFFSPKVDPELEALDGASLPTKGADEFRPFVRRLPEFKFWYSITKAFIVAFMLTFISVLDVPVFWPILLCYWIVLFVLTMKRQILHMIKYKYVPFDIGKQRYTGKK	296.495	AT2G21600.1	1e-94	ATRER1B, RER1B	endoplasmatic reticulum retrieval protein 1B			protein RER1B
LOC18770067	PRUPE_7G009200	ATGGCGTCTCACATTGTTGGATACCCTCGTATGGGCCCCAAGAGAGAGCTCAAGTTTGCTTTGGAATCTTTCTGGGATGGGAAGACCAGTGCCGAAGATTTACAGAAGGTGGCAGCTGATCTGAGATCTTCCATCTGGAAGCAGATGGCTGATGCTGGGATCAAGCACATCCCCAGCAACACTTTCTCATACTACGATCACGTGCTTGACACCACTGCATTGCTCGGGGCTGTTCCACCAAGATATGGATGGAATGGTGGTGAGATTGGATTTGACACATACTTCTCCATGGCCAGAGGAAATGCCTCAGTTCCTGCTATGGAGATGACCAAGTGGTTCGATACCAACTACCATTTCATTGTCCCTGAGTTGGGACCTGATGTCAACTTCTCCTATGCT…	MASHIVGYPRMGPKRELKFALESFWDGKTSAEDLQKVAADLRSSIWKQMADAGIKHIPSNTFSYYDHVLDTTALLGAVPPRYGWNGGEIGFDTYFSMARGNASVPAMEMTKWFDTNYHFIVPELGPDVNFSYASHKAVEEYKEAKALGVDTIPVLVGPVSYLLLSKPAKGVEKSFSLLSLLGKIIPIYKEVISELKAAGASWIQFDEPTLVMDLDSHKLQAFTDAYSHLESTLSGLNVLIETYFADVPAEAFKTLTSLKGVTAYGFDLVRGTKTLDLIKGEFPKGKYLFAGLVDGRNIWANDLSASLSTLQTLEGIVGKDKLVVSTSCSLLHTAVDLVNETKLDQEIKSWLAFAAQKIVEVNALAKALAGHKDEAFFSANAAAQASRKSSPRVTNEAVQ…	871.485	AT5G17920.2	0	ATCIMS	Cobalamin-independent synthase family protein			5-methyltetrahydropteroyltriglutamate--homocysteine methyltransferase
LOC18770172	PRUPE_7G086300	ATGCAGATTTTCGTGAAAACCCTAACTGGGAAGACCATCACTCTTGAGGTTGAGAGCAGCGACACCATCGACAATGTCAAAGCCAAGATCCAGGATAAGGAAGGCATCCCTCCTGATCAGCAGAGATTGATTTTTGCTGGTAAGCAATTGGAGGATGGCCGAACTCTTGCAGATTATAACATCCAGAAGGAGTCAACGCTTCACCTGGTTTTGAGGCTGAGGGGAGGAACTATGATTAAGGTGAAGACTCTTACTGGGAAAGAAATTGAGATTGATATTGAACCAAATGATACCATTGACCGGATCAAGGAAAGGGTTGAGGAGAAAGAGGGAATTCCTCCAGTGCAACAAAGGCTTATCTACGCTGGCAAGCAGCTTGGAGATGACAAAACAGCTAAA…	MQIFVKTLTGKTITLEVESSDTIDNVKAKIQDKEGIPPDQQRLIFAGKQLEDGRTLADYNIQKESTLHLVLRLRGGTMIKVKTLTGKEIEIDIEPNDTIDRIKERVEEKEGIPPVQQRLIYAGKQLGDDKTAKDYNIEGGSVLHLVLALRGGSL	648.95	AT1G31340.1	1e-103	RUB1, NEDD8, ATRUB1	related to ubiquitin 1			ubiquitin-NEDD8-like protein RUB2
LOC18770183	PRUPE_7G168700	ATGCTCTCTGCTTCGACCTCGACATTCTTCGCCGCTCCAATTCTCTCCGCCACCCCTCCCCCTCCCAAAACCTCGACACGTGTACATTTCAGGCCAATAAGCGCCTTCGCCGCCGGTTCCACCTGCACCTCGGACGAGACAGCTACGGCGTCGTACCTCGGCCCTCAGAAGATGACCTCGCTGTACGAGATCCTCGGCATCCCGGCGGTCGCCACGTGTAAGGAGATCAAATCGGCGTACCGGCGATTGGCTAGGGTTTGCCACCCCGACGTGGCGGCGATCGAGCGCAAGGACACGTCGGCTGACGAGTTCATGAAGATTCATGCTGCCTACTCCACGCTGTCGGACCCCGAAAAGCGCGCCGATTACGACCGGAAGTTTATGCGCCGAAGCCGACCG…	MLSASTSTFFAAPILSATPPPPKTSTRVHFRPISAFAAGSTCTSDETATASYLGPQKMTSLYEILGIPAVATCKEIKSAYRRLARVCHPDVAAIERKDTSADEFMKIHAAYSTLSDPEKRADYDRKFMRRSRPLSTASGYSGYYTCRNWETDQCW	326.245	AT4G36040.1	6e-42		Chaperone DnaJ-domain superfamily protein			chaperone protein dnaJ 11, chloroplastic
LOC18770204	PRUPE_7G164300	ATGGGTGTTCTTAGCAATTTATCTCCATCTTCTTCGCCCCTTGCTGTTTTGCTAATCACACTCACAACCCTGCAACTACTTGGAGCAGAATCAAAGACCTTCTGGGGAGATATAGAAGCTCTCAAGGAGCTCAAGAACGCTCTGGACCCCACCTCAGTGAGCCCAGGCTCATGCATAAGCTCATGGGACTTCAAGCTCGACCCCTGCGACAATCTTTTCAGCGACCGATTCACCTGCGGCTTCAGGTGTGACTTGGTCGACTCAGCAACGAGTCGACTCACCGAGCTCAGCCTCGACCAGGCCGGTTACTCCGGTTCACTCTCCTCCATCTCCTGGAACCTCCCTTACCTGCAAACCCTCGACCTCTCCAACAACTTCTTCTCCGGCTCAATCCCCGAC…	MGVLSNLSPSSSPLAVLLITLTTLQLLGAESKTFWGDIEALKELKNALDPTSVSPGSCISSWDFKLDPCDNLFSDRFTCGFRCDLVDSATSRLTELSLDQAGYSGSLSSISWNLPYLQTLDLSNNFFSGSIPDSLSNLTRLTRLGLSGNSFSGSIPASIGSLSNLEELYLDSNSLHGAIPPSLNRLASLKRLELQGNQLSGELPELGSLQNLFYLDASNNVISGQIPLTLPSSLLQISMRNNSLQGTVPENIKHLGFLQVLDLSHNQLGGSVPSYLFEHPSLQQLTLSFNQFSSVQPPISLGTQSEMIALDLSNNQLKGLLPSFLPMMPKLSALTLENNKFMGMIPTQYAFKVAVPGSGVSAFERLLLGGNYLFGPIPGPLLGLKPGSANVGLADNCLY…	328.732	AT5G66330.1	0		Leucine-rich repeat (LRR) family protein			LRR receptor-like serine/threonine-protein kinase ERECTA
LOC18770242		ATGGCTGGGATGCTTCCTGGTGTGGAATGCGCTCGAAGGAGACGAGTCCATCAAAGCGGCGAGTCACCAGGCGTGGGCACACATGGCTGGACCAGGCGCTCCTCTTTTTGTTTGTATGCTAGCAACCATGAAACTCACCATACCTCCACCTTTTCCCTGCAAAGAAGCATATTGAACCAATCATACATGGATGAGAAACTGGGAGTGGAAGCCCGAGAAGCTAAAGGGAGATTAGATGAAAGACTCAGAACACAGAGAAAATCAGAACCCAATAAAAGGCATAGTGTTCATAGAGAAGAAGAGAGATGTGTGGATGGTGGAAGATCTATGTTTCTTCTCGGAGAATTGCAGAAAGAAGTCTTTGGAACAAAGAAGAGCGGGTCAAAGAGGTTCAGCTGG…	MAGMLPGVECARRRRVHQSGESPGVGTHGWTRRSSFCLYASNHETHHTSTFSLQRSILNQSYMDEKLGVEAREAKGRLDERLRTQRKSEPNKRHSVHREEERCVDGGRSMFLLGELQKEVFGTKKSGSKRFSWAKLSWKASDQDECAVCLEIFRPRETLVHLPCAHRFHSGCMVPWLQNNAHCPCCRMGIVSQ	684.492	AT2G15580.1	4e-49		RING/U-box superfamily protein			probable E3 ubiquitin-protein ligase RHY1A
LOC18770251	PRUPE_7G229000	ATGCCGAGCAGAAACCCAGGAGTGATAACCCAGGACTGGGAGCCGGTGGTCATCCACAAGTCCAGGCCCAAGGGTCAAGACCTCCGCGACCCGAAGGCTGTGAACCAGGCGCTCCGGTCCGGCGCGCCGATCCAGACCATAAAGAAATTCGACGCGGGCTCCAACAAGAAGGCAGCGCCGGTCGTCAGCGTGAAGAAGCTCGAGGAAGGGACCGAGCCGGCGGCGCTGGACCGGGTCTCGACCGATGTGAGGCAGGCCATACAGAAGGCGCGTCTGGCGAAGAAGTTGAGCCAGGCCGACCTGGCCAAGCGGATCAACGAGCGGCCTCAGGTGGTTCAGGAGTACGAGAATGGCAAGGCGGTACCGAATCAGGCCGTGCTCTCCAAGATGGAGAGGATT…	MPSRNPGVITQDWEPVVIHKSRPKGQDLRDPKAVNQALRSGAPIQTIKKFDAGSNKKAAPVVSVKKLEEGTEPAALDRVSTDVRQAIQKARLAKKLSQADLAKRINERPQVVQEYENGKAVPNQAVLSKMERILEVKLRGKVGK	217.465	AT3G24500.1	9e-76	MBF1C, ATMBF1C	multiprotein bridging factor 1C			multiprotein-bridging factor 1c
LOC18770253	PRUPE_7G194300	ATGGCCACATCTCAGCTGACAGCGTCGTCAATCTCGGCGAGGAACTTGGCGTCATTTGAAGGCCTCAGACCTTCAAACCTCAAGTTTGGGTCTCCAGTAGGAGTCTCACTTGTAAGCCACAGGTCCTTCCGTGGTCTCGTCGTCAAGGCTGCCACAACGGTCGCTCCCAAGTACACTTCGATTAAGCCTTTAGGTGACAGAGTGCTTGTGAAGATCAAAACCGTGGAAGAGAAAACTGGTGGTGGAATCTTACTCCCAACCAGTGCTCAGACAAAGCCTCAAGGAGGTGAGGTGGTTGCTGTTGGAGAGGGTAAAACAATTGGGAAGACCAAAGTGGGCATCAGTGTTCAGACTGGTGCCGAAGTTGTCTACTCCAAGTATGCTGGGACAGAGGTAGAG…	MATSQLTASSISARNLASFEGLRPSNLKFGSPVGVSLVSHRSFRGLVVKAATTVAPKYTSIKPLGDRVLVKIKTVEEKTGGGILLPTSAQTKPQGGEVVAVGEGKTIGKTKVGISVQTGAEVVYSKYAGTEVEFNGSKHLILKDDDIVGILETEDVKDLKPLNDRVLIKVAEVEEMTPGGLLLTEASKEKPSIGTVIAVGPGTLDEEGNKKPLSISEGSTVLYSKYAGNDFKGKDGSEYIALRASDVIAILS	225.262	AT5G20720.3	8e-131	CPN20	chaperonin 20			20 kDa chaperonin, chloroplastic
LOC18770261	PRUPE_7G115100	ATGCCTAAGGTGAAGACCAACCGAGTCAAATACCCAGAAGGTTGGGAACTGATTGAGCCAACTATTCGCGAGCTACAAGCGAAGATGAGAGAAGCTGAGAATGATACTCATGATGGTAAGAGGAAATGTGAGACCTTGTGGCCGATCTTCAAAATAGCACATCAAAAGAGCCGCTACATTTTTGACCTGTACCATCGGAGAAATGAGATATCCAAGGAGTTGTACGAGTTCTGTCTGGACCAAGGCTATGCTGACCGCAATCTAATTGCAAAATGGAAAAAGCCTGGTTATGAACGCCTCTGCTGTTTAAGATGCATGCAGCCTCGCGATCATAACTTTGCCACAACATGCGTGTGTCGTGTGCCCAAGCATCTGAGGGAGGAGAAGGTTATAGAGTGT…	MPKVKTNRVKYPEGWELIEPTIRELQAKMREAENDTHDGKRKCETLWPIFKIAHQKSRYIFDLYHRRNEISKELYEFCLDQGYADRNLIAKWKKPGYERLCCLRCMQPRDHNFATTCVCRVPKHLREEKVIECVHCGCKGCASGD	252.433	AT4G21110.1	1e-96		G10 family protein			protein BUD31 homolog 1
LOC18770340	PRUPE_7G024100	ATGGCGGATCAGCTGACCGACGATCAGATCTCTGAGTTCAAGGAAGCCTTCAGCCTATTCGACAAGGATGGCGATGGCTGTATCACTACCAAGGAACTCGGGACTGTGATGAGATCATTGGGGCAGAACCCAACTGAGGCAGAGCTCCAGGACATGATTAATGAAGTGGATGCTGATGGTAATGGAACCATCGACTTTCCTGAGTTCTTAAACCTGATGGCCAGGAAGATGAAAGACACCGACTCTGAGGAGGAGCTGAAAGAGGCTTTCAGAGTTTTTGATAAGGATCAGAATGGCTTCATTTCTGCTGCTGAGCTGCGCCATGTGATGACAAATCTGGGGGAGAAGCTCACTGACGAGGAAGTTGATGAGATGATTCGTGAGGCTGATGTTGATGGT…	MADQLTDDQISEFKEAFSLFDKDGDGCITTKELGTVMRSLGQNPTEAELQDMINEVDADGNGTIDFPEFLNLMARKMKDTDSEEELKEAFRVFDKDQNGFISAAELRHVMTNLGEKLTDEEVDEMIREADVDGDGQINYEEFVKVMMAK	3667.52	AT3G43810.1	8e-105	CAM7	calmodulin 7			calmodulin-7
LOC18770408	PRUPE_7G019800	ATGGGAAAGTCTGAAGAAGACCAGGCTTTGCCTTCCAATGTTGCCTCTGAGGCCTCAGCTCAAAATGCAGAGGCTCACTGTGCTGGTTGCTGTGGTGGGTTTCGGAGATTCATTGGCCTCAGATGCATCTTGGTTCTCTTACTCTCTGTTGCTTTGTTCCTCTCTGCTATGTTCTGGTTACCTCCATTTCTTCAGTTTGCGGATCAGAGCGATCTGGATCTTGATTCAAAGTTCAAAGATCATTATATAGTAGCAAGTTTCAATCTTTGGAAGCCAGTTTCTTTGCTGGAGGATAATATTTTGCAGCTTGAAAATGACATTTTTGATGAGATTGTTGCTCCATCAATTAAGGTCGTAATCTTATCTGTGGAATCCTTAACTGGATCAAACACAACAACA…	MGKSEEDQALPSNVASEASAQNAEAHCAGCCGGFRRFIGLRCILVLLLSVALFLSAMFWLPPFLQFADQSDLDLDSKFKDHYIVASFNLWKPVSLLEDNILQLENDIFDEIVAPSIKVVILSVESLTGSNTTTVVFGVDPEPKSSKLLPTSQSLIKSSFEYLVTHQSLSLNTSLFGRTFLFEVLKFPGGITIVPPQNAFLLQKVQILFNFTLNFSIYQIQLNFNELKSQLKAGLHLAPYENLYISLSNSRGSTVAAPTTVRASVFLTVGNTPSMQRLKQLSQTIRGSHSRNLGLNNTVFGRVKQVRLSSIYSLNGGDGTVPSPSPAPLPHPHHHHHHHHHHHHHHHHHHHNPHLAPAVSPAPAPDSGPPASQKGGPAPKDGSPDAQKGSPPKKSCEAKP…	329.498	AT3G56590.1	1e-120		hydroxyproline-rich glycoprotein family protein			uncharacterized
LOC18770420	PRUPE_7G020000	ATGACCGCCCAAACTCAAGAAGAGCAGCTCGCTGCCCAACTCGAACAGCAAAAAATTCATGATGATGAGCCTGTAGTCGAGGACGAAGATGATGAAGATGACGATGATGATGAAGATGATGAAAAGGATGATGATGATGTGGAAGGACAAGGAGATGCAAGTGGTAGGTCTAAGCAGAGCAGAAGTGAAAAGAAGAGTCGCAAGGCAATGTTGAAACTTGGAATGAAGCCAATACCAGGTGTCAGCCGTGTGACTGTCAAGAAGAGCAAGAATATTCTGTTTGTTATCTCAAAGCCAGATGTTTTTAAGAGCCCTGCATCTGATACGTATGTCATTTTTGGGGAAGCAAAGATTGAAGATTTAAGCTCACAACTTCAAACTCAGGCTGCGGAGCAGTTC…	MTAQTQEEQLAAQLEQQKIHDDEPVVEDEDDEDDDDDEDDEKDDDDVEGQGDASGRSKQSRSEKKSRKAMLKLGMKPIPGVSRVTVKKSKNILFVISKPDVFKSPASDTYVIFGEAKIEDLSSQLQTQAAEQFKAPNLNNVTANPEPSTLAQDDEDIDETGVEPKDIELVMTQAGVSRPRAVKALKAAEGDIVSAIMELTN	537.299	AT3G12390.1	2e-80		Nascent polypeptide-associated complex (NAC), alpha subunit family protein			nascent polypeptide-associated complex subunit alpha-like protein 1
LOC18770435	PRUPE_7G182800	ATGGGTAAAGCCAGAGCAGCTGCTCCCAAACGAACCGATACGAAGTTGAAGAGTAAGAGTGCTGGAGCAAGCAAGAAGCCAGCGAAGAAAGCTGGAAAGGATCCAAACAAGCCTAAGAGGCCTGCTAGTGCTTTCTTTGTTTTCATGGAGGACTTCAGAGAGAAGTACAAGAAAGAGCATCCAAACAACAAATCGGTTGCCGCTGTTGGAAAAGCTGGAGGTGATAAATGGAAGTCGTTGTCAGAAGCTGAAAAGGCTCCCTATGTAGCCAAGGCAGAGAAGAGGAAGGTTGAATACAACAAGAACATTCAAGCCTACAACAAGAGATTAGCTGAGGGCCCAAATGGAGCTGATGAGGAAGAGTCTGACAAGTCCAAGTCTGAAGTTAATGATGATGAT…	MGKARAAAPKRTDTKLKSKSAGASKKPAKKAGKDPNKPKRPASAFFVFMEDFREKYKKEHPNNKSVAAVGKAGGDKWKSLSEAEKAPYVAKAEKRKVEYNKNIQAYNKRLAEGPNGADEEESDKSKSEVNDDDEDEDESGEEEDDDE	1199.45	AT1G20693.2	2e-57	HMGB2, HMG BETA 1, NFD2, NFD02	high mobility group B2			high mobility group B protein 2
LOC18770448	PRUPE_7G028400	ATGTCAGGGAGAGGAAAGGGAGGAAAGGGGTTGGGAAAGGGTGGGGCAAAGAGGCACAGGAAGGTGCTGAGGGATAACATCCAAGGCATCACCAAGCCCGCCATTCGAAGACTTGCTCGTAGAGGCGGAGTGAAGCGCATCAGTGGCCTCATCTACGAAGAAACCAGAGGGGTTCTCAAGATCTTCTTGGAGAATGTGATTCGCGATGCTGTGACTTACACTGAGCACGCCAGGAGGAAGACGGTGACTGCCATGGATGTGGTCTATGCTCTCAAGAGGCAGGGACGAACCCTCTATGGTTTCGGAGGTTAA	MSGRGKGGKGLGKGGAKRHRKVLRDNIQGITKPAIRRLARRGGVKRISGLIYEETRGVLKIFLENVIRDAVTYTEHARRKTVTAMDVVYALKRQGRTLYGFGG	297.064	AT5G59970.1	7e-67		Histone superfamily protein			histone H4
LOC18770462	PRUPE_7G209400	ATGGCTCCGAAGCCAATTGCCAGTCCCGTGGCGGTCACGTGGTATCCGACCCTCGCCGTCGTGATGCTTGCCATCGGCCTCATCTTCACCGCTTCCTTCTTCATCTATGAAGCGACCATATCTAGGAAAAGCCGCAGTCTTGCTAAGGAGCTTATAACAGGAACAGTGGCCTCTGTCTTCTTGGGTTTCGGATCCTTGTTCTTACTGCTCGCATCGGGTGTTTATGTCTAA	MAPKPIASPVAVTWYPTLAVVMLAIGLIFTASFFIYEATISRKSRSLAKELITGTVASVFLGFGSLFLLLASGVYV	725.297	AT4G29735.1	2e-22		unknown protein; FUNCTIONS IN: molecular_function unknown; INVOLVED IN: biological_process unknown; LOCATED IN: endomembrane system; EXPRESSED IN: 23 plant structures; EXPRESSED DURING: 15 growth stages; CONTAINS InterPro DOMAIN/s: Uncharacterised protein family UPF0197 (InterPro:IPR007915); Has 30201 Blast hits to 17322 proteins in 780 species: Archae - 12; Bacteria - 1396; Metazoa - 17338; Fung…			transmembrane protein 258
LOC18770476	PRUPE_7G261300	ATGGCGGATGAAAAAGGCAGAGATGGCTCCTCGTTGCTCCACGGCAAGTACGAGCTGGGCCGTCTTCTGGGTCACGGTACTTTCGCCAAGGTCTACCATGCCAGGAATTTGAAGAGCGGGAAAAGTGTGGCCATGAAAGTGGTGGGCAAAGAGAAGGTAATCAAAGTTGGGATGATGGAGCAGATCAAGAGAGAGATCTCCGTGATGAGGATGGTCAAGCACCCCAACATCGTCGAGCTCCATGAGGTCATGGCCAGCAAGTCCAAGATCTATTTCGCCATGGATCTGGTCCGCGGCGGCGAGCTCTTTGCCAAAATCGCCAAAGGCCGGCTTAAAGAAGACGTGGCCAGAGTCTATTTCCAGCAGCTGATCTCAGCCATCGATTTCTGCCACAGCCGC…	MADEKGRDGSSLLHGKYELGRLLGHGTFAKVYHARNLKSGKSVAMKVVGKEKVIKVGMMEQIKREISVMRMVKHPNIVELHEVMASKSKIYFAMDLVRGGELFAKIAKGRLKEDVARVYFQQLISAIDFCHSRGVYHRDLKPENLLLDEDGNLKVTDFGLSAFSEHLKQDGLLHTTCGTPAYVAPEVIGKKGYDGAKADLWSCGVVLYVLLAGFLPFQDDNLVAMYRKIYRGDFKCPPWFSSEARRLVTKLLDPNPSTRITISKVMDSSWFKKSVPKIVRTKQEQEFDETSEKITWKQTETLNAFHIISLSEGFDLSPLFEEKKREEKEELRFATTLPASSVISTLEEVAKAGKFRIKKSDSMVRLQGEESGRKGKLAIAAEIFAMTPSFVVVEVKKDN…	779.735	AT4G30960.1	0	CIPK6, SIP3, SNRK3.14, ATCIPK6	SOS3-interacting protein 3	Kinase		CBL-interacting serine/threonine-protein kinase 6
LOC18770484	PRUPE_7G122900	ATGGCGACCCGCCTCGCGCGAAGAACAATAGCGTCTTCGTCGTTGTCGTCTCTGGTTCTGAGATCAACGGTGTACGATTCATCTCCAGCGGTTATCAGCGTCGTCCATGGTGGGTCCCAACCGAGACGGCAATCATCATCATCGTCATCGTCGTCTAGTAAATCTGACAAGGCGGAGAAGAAGAAGCCAGTGCTAGACCGTCTATCGTCGGTTATAGACGCCGTCAACGACAGTAAACTCCCTCCTGAGCTTCGTGGTCAGCGCAACAACATCAGGTCAGAAACAGATATAATCAATGTGGTTGAGCAAAGAATATGGCATTCAATGGAAGAGGGGCAGTTTGAGAATTTACCAGGAAAAGGGAAGCCCCTCAACTTAACTAGAAACCCTCATGCAGAC…	MATRLARRTIASSSLSSLVLRSTVYDSSPAVISVVHGGSQPRRQSSSSSSSSSKSDKAEKKKPVLDRLSSVIDAVNDSKLPPELRGQRNNIRSETDIINVVEQRIWHSMEEGQFENLPGKGKPLNLTRNPHADPAEDTLYRILSKNGCAPRWVELNKEIRSQVSEWRLALKKAWANKNDHSKWVETSEALKLQVKHINNKVFQYNLMVPFGRQMLGLKWEKELDRLELEE	222.679	AT5G03560.1	1e-88		Tetratricopeptide repeat (TPR)-like superfamily protein			dnaJ homolog subfamily C member 28
LOC18770564	PRUPE_7G104100	ATGAGCAGGTCAGGTCAGCCTCCGGATCTCAAAAAGTACATGGACAAGAAGCTTCAAATCAAGCTGAACGCAAATCGGATGGTTATTGGAACACTTCGTGGTTTTGACCAGTTCATGAATCTAGTGGTTGACAACACCGTAGAAGTGAATGGCAATGAAAAGAATGATATAGGCATGGTGGTGATTCGGGGAAATAGTGTGGTTACCGTTGAGGCACTTGAGCCAGTGGCCAAAAATATGCAGTGA	MSRSGQPPDLKKYMDKKLQIKLNANRMVIGTLRGFDQFMNLVVDNTVEVNGNEKNDIGMVVIRGNSVVTVEALEPVAKNMQ	313.951	AT2G23930.1	9e-48	SNRNP-G	probable small nuclear ribonucleoprotein G			probable small nuclear ribonucleoprotein G
LOC18770565	PRUPE_7G073800	ATGGACTCCTTGGACCCCGCGGAGCGCAGGTATTTGGAGGATGAGGATAGTCCTACCATGAAGACAATTAAGGGTGCAACAAATGGATTTGTTACTGGAACTATTTTTGGGACCATAGTTGCTACTTGGTATGATGTGCCTCGTGTTGAGAGAAGTGTCGCTCTTCCAGGGCTGATAAGGACCCTTAAGATGATGGGAAACTACGGGATCACATTTGCTGCAATTGGGGGAGTGTACATTGGTGTTGAGCAGATCGTGCAGAATTACAGGATGAAGAGAGACTTCATCAATGGAGCTGTTGGTGGTTTTGTTGCTGGGTCGACTATTCTTGGTTACAAAGGAAAGAGCATTTCAACTGCGATTTCTGCGGGGGCAGCCTTAGCGGTCACTTCTTCACTC…	MDSLDPAERRYLEDEDSPTMKTIKGATNGFVTGTIFGTIVATWYDVPRVERSVALPGLIRTLKMMGNYGITFAAIGGVYIGVEQIVQNYRMKRDFINGAVGGFVAGSTILGYKGKSISTAISAGAALAVTSSLIDAGGQTTRIDNGKEYYPYTTKKRSTADS	358.391	AT2G42210.2	7e-88	ATOEP16-3, OEP16-3	Mitochondrial import inner membrane translocase subunit Tim17/Tim22/Tim23 family protein			outer envelope pore protein 16-3, chloroplastic/mitochondrial
LOC18770577	PRUPE_7G200300	ATGATTTTCCCTATCTTCTTCACATTTTTTCTCCTCCTCTCCTCTTCCCATGCCTCTGTGCAAGACTTCTGTGTTGCAGACTACAAAGCTCCTGATGGCCCTGCAGGCTACTCTTGCAAGAAGCCTGCAAAAGTTACCATCAATGATTTTGTGTACTCAGGCCTAGGCATTGCTGGTAACACCACAAATATCATCAAAGCAGCAGTCACCCCTGCATTTGCTGCCCAATTTCCTGGTGTGAATGGCCTTGGCATTTCACTGGCTCGTTTAGACCTGGGTCCGGGTGGAGTTATCCCCTTTCACACTCACCCCGGAGCTTCAGAAGTCTTACTTGTTGTCCAAGGGACAATAATTGCCGGGTTTGTTGCCTCAGATAACACACCTTATCTGAAAACTCTT…	MIFPIFFTFFLLLSSSHASVQDFCVADYKAPDGPAGYSCKKPAKVTINDFVYSGLGIAGNTTNIIKAAVTPAFAAQFPGVNGLGISLARLDLGPGGVIPFHTHPGASEVLLVVQGTIIAGFVASDNTPYLKTLKKGDIMVFPQGLLHFQVNGGGTPALAFPSFSSPSPGLQILDFALFKNDLPTELIAQTTFLDAAQIKKLKGVLGGTN	220.718	AT5G20630.1	1e-100	GLP3, GLP3A, GLP3B, ATGER3, GER3	germin 3			auxin-binding protein ABP19a
LOC18770614	PRUPE_7G127400	ATGGTTTGCGTGGCGTGTCTCTTACCACTTTTCCTCGTCCCAATAGTCAATTTTTTGCCCCTTCTCTTCTACTACATCGTGGGAAAAATTTATAGGCTTCTCGGGTGGGAGTACAGAAAGCCAGAAATAGCTCCTCCGGCATGTCCTTACAAGCCTGTAGCTAAACAGGACAGCAAAGTAAATGAAAAAGCTGAACTTGCGCAACCAGACTCTGTTCCCGAATTTGTTGGAGCTGTAGGTTTGAAGCAAGAATGA	MVCVACLLPLFLVPIVNFLPLLFYYIVGKIYRLLGWEYRKPEIAPPACPYKPVAKQDSKVNEKAELAQPDSVPEFVGAVGLKQE	230.428	AT5G03460.1	3e-23		unknown protein; FUNCTIONS IN: molecular_function unknown; INVOLVED IN: biological_process unknown; LOCATED IN: endomembrane system; EXPRESSED IN: 24 plant structures; EXPRESSED DURING: 15 growth stages; Has 30201 Blast hits to 17322 proteins in 780 species: Archae - 12; Bacteria - 1396; Metazoa - 17338; Fungi - 3422; Plants - 5037; Viruses - 0; Other Eukaryotes - 2996 (source: NCBI BLink).			uncharacterized
LOC18770634	PRUPE_7G005700	ATGGCACCGAAGAAGGATAAGGCACCGCCGCCGTCTTCGAAGCCGGCGAAGTCAGGAGGAGGCAAGCAGAAGAAGAAGAAGTGGAGCAAAGGAAAGCAAAAGGAGAAGGTCAACAACATGGTGCTCTTCGACCAGGGCACGTACGACAAGCTCATCGCTGAGGCCCCCAAGTATAAGCTCATCACACCCTCCATTCTCTCCGACCGTCTCAGGATCAATGGATCGCTGGCGAGGAAGGCCATAAGGGACTTGATGGCCAGAGGGGCGATTAGGATGGTTTCTGCTCATGCCAGCCAGCAGATTTACACCAGGGCCACCAACACTTAG	MAPKKDKAPPPSSKPAKSGGGKQKKKKWSKGKQKEKVNNMVLFDQGTYDKLIAEAPKYKLITPSILSDRLRINGSLARKAIRDLMARGAIRMVSAHASQQIYTRATNT	1939.1	AT2G21580.1	1e-53		Ribosomal protein S25 family protein			40S ribosomal protein S25
LOC18770692	PRUPE_7G092100	ATGGCTCAGTTCAAGCTGATCGCTTCCCTACTTGTATCTCTATGTCTCGTTCTACCTCTCATCCAAGCCAAAGATGTTAACTACTGCGATAAGAAGGCTGACTATGATGTCAAGGTCAAGGCAGTCGAGATAATTCCTTACCCTGTGGCGAGAGGCAAGCCTGCCAGCTTCAGCATTTCTGCAACTACAGGTGAATCAATCTCTGGAGGAAAATTGGTGATTGAGGTTTCATACTTTGGTTGGCACATCCACAGTGAGACTCATGACCTTTGCTCAGAAACATCTTGCCCTGTTTCAACTGGTGATTTCGTGATTGCTCACTCGCAAGATTTGCCTGGATATACTCCACCTGGTTCATACTCTCTTAAAATGAGGTTGTACGACGGAAACAAACATGAA…	MAQFKLIASLLVSLCLVLPLIQAKDVNYCDKKADYDVKVKAVEIIPYPVARGKPASFSISATTGESISGGKLVIEVSYFGWHIHSETHDLCSETSCPVSTGDFVIAHSQDLPGYTPPGSYSLKMRLYDGNKHELTCIAFDFDIGFASSDSSVADS	799.013	AT3G11780.1	3e-70		MD-2-related lipid recognition domain-containing protein / ML domain-containing protein			putative phosphatidylglycerol/phosphatidylinositol transfer protein DDB_G0282179
LOC18770749	PRUPE_7G243300	ATGGCTTCTTTAACCCCAATTTCGCAATCCCAGTCCCTTTTTAACAAGACCCGTTGCCCACCCAAGTCTCTCACAAGCCCCAATTTAGGCTCTGATTTCTTGCTTAAAAAATCCTCTGTTTCGATCCCAAGGATGAGTACCAGAGTGCCCATGAAGGCTGCTGGGGTTGTTTCTGCCACCACAGCGGAGAAGGCCAAGAAGAGATACCCGGGTGAGTCAAAGGGGTTTGTGGAGGAGATGAGGTTTGTGGCCATGAAATTACACACCAAGGACCAAGCTAAGGAGGGTGAGAAGGAGGTCAAAGAGCCTCAGGAGAGACCAGTGGCTAAGTGGGAACCAACCGTTGATGGGTATTTGAAGTTCCTTGTGGATAGCAAGTTGGTGTATGATACCCTTGAA…	MASLTPISQSQSLFNKTRCPPKSLTSPNLGSDFLLKKSSVSIPRMSTRVPMKAAGVVSATTAEKAKKRYPGESKGFVEEMRFVAMKLHTKDQAKEGEKEVKEPQERPVAKWEPTVDGYLKFLVDSKLVYDTLEGIVEKAPFPSYSEFRNTGLERSAKLAKDLEWFKEQGHVIPEPSAPGVTYAEYLKELSEKDPQAFLCHFYNIYFAHSAGGRMIGKKVAEMILDKKELEFYKWDGELSQLLQNVREKLNKVAQSWTREEKNHCLEETEKSFKHSGEILRLILS	932.811	AT2G26670.1	3e-147	HY1, ATHO1, HO1, TED4, GUN2, HY6	Plant haem oxygenase (decyclizing) family protein			heme oxygenase 1, chloroplastic
LOC18770752	PRUPE_7G198500	ATGGCTCGCGTGACGCTGGTCCTGTCCGCCGCCTTGGTCCTGGTGGCGATCAGCTGCGGCGCAGCAGCATCGAGCTTCGACGAGTCCAACCCCATCAGATTGGTATCGGATGGCCTCCGTGAGCTGGAGCAGCAAGTCGTCCAAGTCCTCGGCTACTCTCCCCGCGCCCTCCACTTCGCCCGCTTCGCTCACCGGTACGGGAAGAAATATGAGAGCGTGGAGGAGATGAAGCTGCGGTATGAGATTTTCTCGGAGAATAAGAAGCTGATTCGATCCACAAACAAGAAGGGCTTGCCTTACACTCTTGCTGTCAATCGGTTTGCTGATTGGAGTTGGGAAGAGTTCAGAAGGCAGAGGTTGGGAGCTGCCCAGAACTGCTCTGCCACCACAAAGGGCAGC…	MARVTLVLSAALVLVAISCGAAASSFDESNPIRLVSDGLRELEQQVVQVLGYSPRALHFARFAHRYGKKYESVEEMKLRYEIFSENKKLIRSTNKKGLPYTLAVNRFADWSWEEFRRQRLGAAQNCSATTKGSHKLTDAVLPESKNWREEGIVTPVKDQGHCGSCWTFSTTGALEAAYVQAFGKQISLSEQQLVDCAGAFNNFGCNGGLPSQAFEYIKYNGGLDTEAAYPYVGTDGACKFSAENVGAQVLDSVNITLGDEQELKHAVAFVRPVSVAFQVVKSFRFYKSGVYTSDTCGSSPMDVNHAVLAVGYGEEGGVPFWLIKNSWGESWGDNGYFKMEFGKNMCGVATCASYPIVA	969.885	AT3G45310.1	0		Cysteine proteinases superfamily protein			thiol protease aleurain
LOC18770850	PRUPE_7G015800	ATGGGTTCTACTGCTGCTGCTGCTGCTGTGAATATGGCGTCGTTGATTACTGCCATCCCTGTTTCTTCGACAAAATTGAATTTCAATGACAAATTTACATCTGCGTTTCATTTCGAACGAGCTAGGGCCATCACCAAAATCACTGCCATCTCTCCCAACGGCTCTGCTTCTCGTTCTTCTTCACATGGGGCTGAGTGCTCGGCTGGGGATGTGGATAAACGAAGAAATAGTCTTGAATCTCTGTTTTGTTATGATATGGCCGTACCAGAAGAGAGAATTGAGAAGCCTATTGGGATATCTTTGGCCGAGAAAGTCATTGGAAATAAGCCCCGATGCATTGATTGTGAAGCCAAAGGTGCCATCCTTTGCACCACTTGTTCTGGTTCAGGCCTGTATGTT…	MGSTAAAAAVNMASLITAIPVSSTKLNFNDKFTSAFHFERARAITKITAISPNGSASRSSSHGAECSAGDVDKRRNSLESLFCYDMAVPEERIEKPIGISLAEKVIGNKPRCIDCEAKGAILCTTCSGSGLYVDSILESQGIIVKVRCLGCGGTGNIMCSECGGRGHLG	236.12	AT5G17840.1	1e-42		DnaJ/Hsp40 cysteine-rich domain superfamily protein			uncharacterized
LOC18770852	PRUPE_7G095700	ATGCCGGCTGGACACGGTCTCAGGTCTCGTACTCGCGATCTCTTCTCGCGGGCCTTCAGGAAGAAGGGCTACATTCCTCTCTCAACCTATCTGAAGACCTACAGGATCGGCGACTATGTCGACGTCAAGGTTAACGGCGCCGTGCACAAGGGTATGCCCCACAAGTTCTACCACGGACGTACTGGTCGCGTCTGGAACGTCACCAAGCGCGCCATCGGTGTGGAGATCAACAAGCAGGTTGGCAACAGGATTATCAGGAAGAGGATCCATGTGCGTGTGGAGCATGTGCAGCCTTCAAGGTGCACTGAGGAATTCTGTTTGAGGAAGATAAAGAATGATCAGTTGAAGGCTGAGGCCAAGGCAAAGGGTGAGGTTATTAGCACCAAGAGGCAGCCAAAG…	MPAGHGLRSRTRDLFSRAFRKKGYIPLSTYLKTYRIGDYVDVKVNGAVHKGMPHKFYHGRTGRVWNVTKRAIGVEINKQVGNRIIRKRIHVRVEHVQPSRCTEEFCLRKIKNDQLKAEAKAKGEVISTKRQPKGPKPGFRVEGAVMETVTPIPYDVVNDLKGGY	459.182	AT1G09690.1	6e-104		Translation protein SH3-like family protein			60S ribosomal protein L21-1
LOC18770960	PRUPE_7G085300	ATGCAAATGACCGAGTTAATACCTGGTCTACCAGAGGAACTCGGGCACGAGTGCCTGACTCGTTTGCACTACTCGACTCACCGAGTCGCCTCACGCGTTTGCCGCCGCTGGCAGGACATGCTTCAAAGTCTGGATTTTTACAACCACAGAAAGCAATCCGGGCGCACCCACAAGCCCGCTTGCCTCGTCCAGGCGCTTCCGGTTCAGACCAGGGTTGACGAGACCAAACCGGGTGGACCGCCCGTTTACGGCGTCTCGGTTTTTGACCCTGTGAGTGGGAGCTGGGACCGGGTGGACCCGGTTCCGAAGTACCCACATGGGCTTCCGCCGTTCTGCCAAGTGACGGCGTGCGAGGGCAAGCTCGTGTTGATGGGCGGGTGGGACCCGGCGAGTTACCAG…	MQMTELIPGLPEELGHECLTRLHYSTHRVASRVCRRWQDMLQSLDFYNHRKQSGRTHKPACLVQALPVQTRVDETKPGGPPVYGVSVFDPVSGSWDRVDPVPKYPHGLPPFCQVTACEGKLVLMGGWDPASYQPVRDVFVYEFTTQRWTRGKDMPETRSFFAAGEFNGRVYVAGGHDQNKNALKSARVYDVRENEWSELPGMSQERDECEGFVSGSEFWVVSGYGTDSQGGFVGCAEVYEIGSGQWRRVEDAWRAGQCPRSCVGVGKDGKLFCWGDCDSRVRVGTSAVELGPWALVSGSAYQGGAQGSFLVEGQNGKLKNVEAPDEFSGFVQSGCCVEI	234.255	AT2G44130.1	3e-65		Galactose oxidase/kelch repeat superfamily protein			F-box/kelch-repeat protein At2g44130
LOC18770977	PRUPE_7G114700	ATGAAGGTTGTTGCAGCATACTTGTTGGCTGTGTTGGGGGGCAATACCACCCCTTCTGCCGAAGATCTCAAGGACATCCTTGGCTCTGTTGGAGCTGAGACTGATGATGATAGGATTCAGCTTCTTCTTTCGGAAGTGAAGGGTAAGGACATTACAGAGCTTATTGCTTCTGGAAGGGAGAAGTTGGCCTCTGTACCATCTGGTGGTGGTGCTGTTGCAGTGGCTGCACCTGGTGCTGGTGCTGGTGCCGCTGCTCCTGCTGCAGCTGAGCCAAAGAAAGAAGAGAAGGTTGAGGAGAAAGAGGATACCGATGATGATATGGGTATTGCAGTACCATCTGTTAATGAGTGCTGA	MKVVAAYLLAVLGGNTTPSAEDLKDILGSVGAETDDDRIQLLLSEVKGKDITELIASGREKLASVPSGGGAVAVAAPGAGAGAAAPAAAEPKKEEKVEEKEDTDDDMGIAVPSVNEC	677.269	AT2G27710.4	3e-30		60S acidic ribosomal protein family			60S acidic ribosomal protein P2B
LOC18770979	PRUPE_7G196700	ATGGGTTTTGCCAAGAAAGAGTATGAGTTTCTAAGCGAGATCGGTCTGGGTCCCGAGAATCCTGGTGGCTTCATCAATGGCAAGTGGAAGGCAAGTGGCCCAGTTATCTCTACTGTTAACCCTTCTAACAATCAGCAAATTGCTAAAGTCACGGAAGTGTCTATAGAAGATTATGAGGAGGGCTTGCGTGCCTGCAATGAAGCAGCCAAGACATGGAAGAGTCTCCCAGCACCAAAAAGAGGTGAGATTGTTAGGCAAATAGGAGACGCATTAAGAGAGAAATTGCAGCATCTGGGTAGGCTTGTGTCCCTCGAGATGGGAAAAATACTTGCTGAAGGAATTGGGGAAGTTCAGGAAGTTATTGATATGTGTGATTATGCTGTTGGACTGAGCCGACAA…	MGFAKKEYEFLSEIGLGPENPGGFINGKWKASGPVISTVNPSNNQQIAKVTEVSIEDYEEGLRACNEAAKTWKSLPAPKRGEIVRQIGDALREKLQHLGRLVSLEMGKILAEGIGEVQEVIDMCDYAVGLSRQLNGSIVPSERPNHMMFEVWNPLGVVGVITAFNFPCAVLGWNACIALVCGNCVVWKGAPTTPLVTIAVTKLVAEVLEKNNLPGAIFTSFCGGAEIGEAIAKDTRIPLVSFTGSSKVGSKVQKIVNERFGKCLLELSGNNALIVMDDANIGLAVRSILFAAVGTAGQRCTTCRRLYLHESIYQSVLDQLVGLYKQVKIGDPLEKGTLVGPVHTQASRENFEKGISTIKSQGGKILTGGSVIESDGNFVQPTIVEISSDASVVKEELFG…	322.227	AT1G54100.2	0	ALDH7B4	aldehyde dehydrogenase 7B4			aldehyde dehydrogenase family 7 member A1
LOC18771018	PRUPE_7G103700	ATGGCGGAGCCAAAAGGCCGACCGGTTGGTGGCACAGAGACCAGCTGGTGTCGCGCCGTGCCTGGCGGCACCGGCATCACGGTGCTAGCCCTTCATGCCTCGAAACCCCCGGATGTGCTCAATCTCCAAACTGCCCTCCTGAAAGTCCAAAACTCCCACCCCATCCTCAACTCAAGGCTCCATACAAACCCCAAAACAAACACACTCTCCTTTGTCCCATCCCCCACTCCCTATGTCCAAATCAAATCGTTCAGCCTCTCATCAACTTTGGAAATCCTTGAAACCCTCTACAGCCCAATTAGCAACTCCTCAGTCTCTCCTTTTCACCTGATCCTTGAGCATGAGCTGAACCAAAACCCTTGGCAGCTGAAGAACACTACATGCACAACTGACCAAGAC…	MAEPKGRPVGGTETSWCRAVPGGTGITVLALHASKPPDVLNLQTALLKVQNSHPILNSRLHTNPKTNTLSFVPSPTPYVQIKSFSLSSTLEILETLYSPISNSSVSPFHLILEHELNQNPWQLKNTTCTTDQDMFFASIYALPSAMWVVALRLHVSACDRTSAVSLLREVVGLMGGGDEGGEVNMEIRNEGEVNLGIEDLIPSGKGKKAMWVRGMDMLSYSVNSLRLTNLKFTDNKSARVSQVVRLQMNEDDTQRVLNGCKTRGIKLCAALVAAGLMAVDKYRLENQKKYGVVTLTDCRSNLHPALSHKHFGFYHSAILNTHTTKGGETLWELANKTYKAFVSSKRNNKHFSDMADLNFLMCKAIDNPTLTSSSSLRASFMSVFEDPVIDDSNDKQREL…	379.104	AT3G52610.1	2e-141		unknown protein; Has 68 Blast hits to 67 proteins in 21 species: Archae - 0; Bacteria - 11; Metazoa - 0; Fungi - 0; Plants - 55; Viruses - 0; Other Eukaryotes - 2 (source: NCBI BLink).			uncharacterized
LOC18771021	PRUPE_7G125200	ATGTCTGGCCCTGCGGCCATTGACGATAGCGCGGGAGAAGCACGCTCTTATGCAGAGAGAACAAAATCACTTGATGCCATTTCCAAAGAAGACAGAGAATCCATATTAAATAATGGCGAAGTTGCTCATACTTCTGAAATTGCTGCCTTTAGAGTCAGGGAGCTATTACTTCCAAATAAGGAATCCTATTCGGGGCCGGTGCTTGGAAACATCCCCGAGGGTAGGGGAAGGTATGCCTGGTCAGATGGCTGCATATACGAGGGTGAGTGGAGACGGGGGATGAGACATGGGAGCGGAAAAATTATTTGGCCTTCAGGTGCCATTTATGAGGGAGAATTTTCAGGTGGATATATGCATGGTACAGGGACTTACATTGGATCAGATAAGATGACATATAAG…	MSGPAAIDDSAGEARSYAERTKSLDAISKEDRESILNNGEVAHTSEIAAFRVRELLLPNKESYSGPVLGNIPEGRGRYAWSDGCIYEGEWRRGMRHGSGKIIWPSGAIYEGEFSGGYMHGTGTYIGSDKMTYKGRWRLNLKHGLGYQVYPNGDAFEGSWIQGMPEGPGKYTWVNGNVYLGNMKGGKMSGKGTLTWTNGDSFEGSWLNGMMHGFGVYTWSDGGFYVGTWTRGLKDGKGSFYPKGSRLPAAEELYLNALRKRGLLPDLRKQNNAHIHHATSVDMGNSKIGESQGSHRVSADKISNRNLLNLEPSHRNVSLERRWSLEVSFEKVIGHDSLEGGEKDAGTGIPILEREYMQGVLISELVLNNSFTSSSRRAKRRQKKLAKVVKRPGEAIIKGH…	290.511	AT3G09920.3	0	PIP5K9	phosphatidyl inositol monophosphate 5 kinase			phosphatidylinositol 4-phosphate 5-kinase 9
LOC18771025	PRUPE_2G128000	ATGACTTCTCCACCAGTATCAATCATTTTCATCTTCTTCTTCATCATCACTCTTATCCCACTAATCCACTCTGTTCCTTTCATTGTTTTTCATGGCATTGGAGATAAATGCAGCAACCGAGGAGTCACACAATTTACTGAGCTCTTAAGCAACTGGTCGGGTTCTCAAGGATACTGCATAGAAATTGGGGATGGATCGTGGGATTCCTGGACTGTGCCCTTATTGGAACAGACGACCATTGCTTGCGAGAAGGTGAAAAATATAAGTGAATTAAGTGAGGGTTACAACATGGTTGGACTTTCTCAGGGTAACATGGTTGGTCGAGGAGTAATTGAATTTTGTGATGGGGGACCTCCTGTTAAGAATTTTATATCACTAGCAGGTCCCCATGCTGGTACT…	MTSPPVSIIFIFFFIITLIPLIHSVPFIVFHGIGDKCSNRGVTQFTELLSNWSGSQGYCIEIGDGSWDSWTVPLLEQTTIACEKVKNISELSEGYNMVGLSQGNMVGRGVIEFCDGGPPVKNFISLAGPHAGTASIPFCGSEWICALLDNLIKSEIYSSYVQEHLSPSGYLKIPTDIAAYLKGCRFLPRLNNERKTMSNSTYKERFSSLEKLVLIMFEQDTILIPKETSWFGYFPDGAFDPILPAQETKLYTEDWIGLKTLDEAGKVKFIKVSGGHLHISRSDMKKYVVPYLENEASMQPKIAEPSSHKSFSSIWNNFLDLFGLTEHRQLVLTVV	229.137	AT3G60340.2	1e-166		alpha/beta-Hydrolases superfamily protein			palmitoyl-protein thioesterase 1
LOC18771060	PRUPE_7G194600	ATGTTGAAGTTTGGCAAGAGGCCATTTCCAATGATCGGGAAGCTGTCGGAATTGCTAGTTTCCGGCAACCGTGCCGGGTTTTTCTTCGACATGGGCACGACAAGCCCAAGAAGTCCATTAGACCTCAAGATGCAATCTTCTAGCCCCAGAGGGTTGAAGAATTATGATCTTGGTGGTGTTGGGTTGGGCATAGTTGCTGCCTTGGAAAAGTCGAGCCATAATGGACGTGAGATTTTGGCCAAGTATGCGGTTTGTGGTCAAAACCTGAACCAATCAGAGCCAATTCCTGTAAGCTCTGCTCAAAACTGTGATGGGTTTTCAACCAGGGGTCTCCCGGAGTTTGAGGAAGATAGCTTGGAGAATTATACTTATGTGACTCAGCGTGGACGCAACAAGTCT…	MLKFGKRPFPMIGKLSELLVSGNRAGFFFDMGTTSPRSPLDLKMQSSSPRGLKNYDLGGVGLGIVAALEKSSHNGREILAKYAVCGQNLNQSEPIPVSSAQNCDGFSTRGLPEFEEDSLENYTYVTQRGRNKSFTRVYYDGGDCKTSSMHHRVEDDLQTCNDNNLASVFPTSDFLSSCHLCKKNLHGKDIYMYRGESAFCSTECRATQMMMDESKERCRSEALRSVEVSGSSCSRDQIFSTGILVI	439.043	AT5G20700.1	2e-43		Protein of unknown function (DUF581)			uncharacterized
LOC18771153	PRUPE_7G116500	ATGTCTGCTTTCAGGGGCAAATACGCTGATGAGCTCATTGCCAATGCTGCCTACATTGGCACCCCTGGAAAGGGTATTCTTGCTGCTGATGAGTCAACTGGAACAATCGGCAAACGTTTTGCCAGCATCAATGTTGAGAATGTTGAATCAAACAGGCGTGCTCTTCGTGAGCTCCTCTTCACCGCCCCTGATGTGCTCCAATACCTTAGTGGAGTGATTCTCTTTGAAGAAACTCTCTACCAGAAGACAGCCTCAGGCAAGCCATTCGTTGATGTCTTGAAGGAAGGAGGTGTTCTACCTGGAATCAAGGTTGACAAGGGCACCGTTGAGCTTGCCGGAACCAATGGTGAGACCACAACCCAGGGTCTAGATGGGCTCGCCCAGCGTTGCCAAAAGTAC…	MSAFRGKYADELIANAAYIGTPGKGILAADESTGTIGKRFASINVENVESNRRALRELLFTAPDVLQYLSGVILFEETLYQKTASGKPFVDVLKEGGVLPGIKVDKGTVELAGTNGETTTQGLDGLAQRCQKYYEAGARFAKWRAVLKIGPNEPSQLSINENANGLARYAIICQENGLVPIVEPEILVDGPHDIEKCADVTERVLAACYKALNDHHVLLEGTLLKPNMVTPGSDAKKASPEVIAEYTVRALLRTTPAAVPAVVFLSGGQSEEEATLNLNAMNKLKGKKPWSLSFSFGRALQQSTLKAWAGKEENIGKAQAALLTRAKANSEATLGTYKGDAKLGEGAAESLHVKDYKY	1134.39	AT2G36460.1	0		Aldolase superfamily protein			fructose-bisphosphate aldolase 1, cytoplasmic
LOC18771170	PRUPE_7G083200	ATGCCGGCTGGACACGGTCTCAGGTCTCGTACTCGCGATCTCTTCTCGCGGGCCTTCAGGAAGAAGGGTTACATCCCTCTTTCAACCTATCTGAAGACCTACAGGATCGGCGACTATGTCGACGTCAAGGTTAACGGCGCCGTGCACAAGGGTATGCCCCACAAGTTCTACCATGGACGTACTGGTCGCGTCTGGAACGTCACCAAGCGCGCCATCGGTGTGGAAATCAACAAGCAGGTTGGCAACAGGATTATCAGGAAGAGGATCCATGTGCGTGTGGAGCATGTGCAGCCTTCAAGGTGCACTGAGGAATTCCGTTTGAGGAAGATAAAGAATGATCAGTTGAAGGCTGAGGCCAAGGCAAAGGGTGAGGTCATTAGCACCAAGAGGCAGCCTAAG…	MPAGHGLRSRTRDLFSRAFRKKGYIPLSTYLKTYRIGDYVDVKVNGAVHKGMPHKFYHGRTGRVWNVTKRAIGVEINKQVGNRIIRKRIHVRVEHVQPSRCTEEFRLRKIKNDQLKAEAKAKGEVISTKRQPKGPKPGFRVEGAVMETVTPIPYDVVNDLKGGY	2236.26	AT1G09690.1	1e-104		Translation protein SH3-like family protein			60S ribosomal protein L21-1
LOC18771245	PRUPE_7G047300	ATGAAGCTCATCAAAATCAGCTCCAAAAGTCTCAGCCCGAAACGCCTCTTCCGGTCCAAGAAGGACCGATCCGCGGTGTCCCGCCGCTCCTCCGACCCACTATCGTTTGAGTCCGGAACGGCGTCGTCGTCGTCGTCGTCATCCTCGTCCTCGGACTCACTCCACAAGCCCGGAACCGGAGCCGAAGCTGGTGGTATCGGGACGCCGACGAGCGTTTTGCTCGAAAGATCGGGCGACTGGTCCGATTTCTCGACCGATCTGCAGCTCGACATGGCTCAGGCGTTTAAGCTTATAGACCGAGACAACGACGGAGTGGTCTCGAGAAAAGAGCTAGAGGCTCTGCTGAGCCGGCTTGGAGCCGACCCGCCGAGCCAAGAAGAGGTGATGTTGATGCTGAGC…	MKLIKISSKSLSPKRLFRSKKDRSAVSRRSSDPLSFESGTASSSSSSSSSSDSLHKPGTGAEAGGIGTPTSVLLERSGDWSDFSTDLQLDMAQAFKLIDRDNDGVVSRKELEALLSRLGADPPSQEEVMLMLSEVDREGNGSISLEALLSRVGPVCGPAADSELRDAFEVFDSDHDGKISAEELLNVFTAIGDDRCTLEDCRRMIAGVDKNGDGFVCFEDFARMMELQR	212.92	AT3G10190.1	5e-62		Calcium-binding EF-hand family protein			probable calcium-binding protein CML36
LOC18771271	PRUPE_7G227700	ATGGCCAATTCTCTCTTCTTCTGCTTCTCTCTCCTCCTCCTCCTACCTTTCTCTACCCAGAACGCCTACCCTAAAACCCCGGACCCGAACCCAATTCCGAGCCCGTCTCCGGCCCACACCGAGCTCACCAACTACGGCTTCCCAATCGGGCTTCTACCCTCCGCGGTCAAAAACTACACCCTGGACCGGACCTCCGGTGACTTTATCGTCGACCTCGGCGGCGCGTGCAAGGTGACGCTCCCTCCCGATAACTACTTGGCCACGTACTCGAAGAAGATCACGGGCAAGATCGTGCAGGGCAAAATCGCCGAGATCAATGGGATTAGCGTCCGAGCCTTCTTCCAGTGGTGGTCTATTACTGGAATTAGGTCGAGCGGCGACAACTTGGTGTTCGAGGTC…	MANSLFFCFSLLLLLPFSTQNAYPKTPDPNPIPSPSPAHTELTNYGFPIGLLPSAVKNYTLDRTSGDFIVDLGGACKVTLPPDNYLATYSKKITGKIVQGKIAEINGISVRAFFQWWSITGIRSSGDNLVFEVGVVTAKYPSKNFDESPACEGRHSSS	334.233	AT5G19590.1	2e-64		Protein of unknown function, DUF538			uncharacterized
LOC18771287	PRUPE_7G250200	ATGGGCTTCGTTTTCGGATTAGTGCTCGGAATTCTAGTGGGACTCGCAATTATCGTGGTGTTTGTCCGCTTGGAGAACCACCGATCCAAGCTCCGTTCCGAGCTCGCCACAACTGTAGCTGCTTTTGCTCGAATGACTGTCGAGGATTCTAGAAAGCTCTTACCTTCTGAGTATTACCCTTCTTGGGTCGTCTTCTCCCACAGACAGAAGTTAAAATGGCTCAATCTTCATCTTCAAAAGATCTGGCCCTATGTTAATGAGGCAGCGTCTGAGCTGATAAAGACTTCAGTGGAGCCAATTCTGGAGCAGTATAGACCAATGATATTGTCCTCACTCAAATTTTCCAAGTTCACTCTTGGTACCGTGGCACCGCAGTTTACAGGGGTTTCTATAATTGAA…	MGFVFGLVLGILVGLAIIVVFVRLENHRSKLRSELATTVAAFARMTVEDSRKLLPSEYYPSWVVFSHRQKLKWLNLHLQKIWPYVNEAASELIKTSVEPILEQYRPMILSSLKFSKFTLGTVAPQFTGVSIIEDEGDGVTMELEMQWDGNPSIILAIKTLLGVSLPVQVKDIGFTGVFRLIFKPLVDEFPCFGAVCYSLREKKNLEFRLKVVGGDISTIPGIYDAIEGMIRDAIEDSIAWPVRKVVPILPGDYSDLELKPVGMLEVKLVQAKDLTNKDLIGKSDPYAVVYIRPLQDRMKKSKTINNDLNPIWNEHFEFIVEDASTQHLVVKVYDDEGVQSSELIGCAHVLLSELQPGKVKDVWLKLVKSLEVQRDNKNRGQVHLELLYCPFGMENGFVN…	271.424	AT1G05500.1	0	SYTE, ATSYTE, NTMC2TYPE2.1, NTMC2T2.1, SYT5	Calcium-dependent lipid-binding (CaLB domain) family protein			synaptotagmin-5
LOC18771290	PRUPE_7G094600	ATGGGTCTGCTCTCCAACAGAGTGGATAAGGGGAGCCTGAAGCCTGGGGATCACATCTACTCTTGGAGGACTGCCTATATCTATGCTCATCATGGCATCTATGTAGGGGATGACACAGTCGTTCATTTCACCAGGCGTGGGCAAGAAGTAGGAACAGGGACAATGCTGGATGCACTCTTGGTTAGCTCAGGGCCAGCCCGACCTCAACAGCCCTGCCAAGTTTGCACTCCACGGGAAGAGGGAAGTGGGGTTCTCTCCTCGTGCCTGAACTGCTTTCTTGCAGGGGGTGTCTTGTATCGTTTTGAATATGCTGTCAACCCTGCTCTCTTTATTGCAAAAGCACGTGGGGGAACCTGCACTCTTGCAGTCTCGGATCCAGATGATGTCGTCGTCCATCGA…	MGLLSNRVDKGSLKPGDHIYSWRTAYIYAHHGIYVGDDTVVHFTRRGQEVGTGTMLDALLVSSGPARPQQPCQVCTPREEGSGVLSSCLNCFLAGGVLYRFEYAVNPALFIAKARGGTCTLAVSDPDDVVVHRAKYLLDNGFGCYNVFKKNCEDFAIYCKTGLLVLDQGTIGQSGQAVSIIGGPLAAVLSTPLRLVTTNVYGMAATAITMYCASRYAADIGMRRDVVKVSVEDMTSKLATGLLRVAEAQIVLAPIIGSSNLVTQ	225.406	AT5G06370.1	6e-144		NC domain-containing protein-related			uncharacterized
LOC18771294	PRUPE_7G072900	ATGGCGGCAAAAGCAAGAAACCCCAGGAAGACCCGAAACCCAGATCTGGTTCGTGGGGTGGGTAAGTTCTCGAGGTCCAAGATGTACCACAAGCGTGGTCTTTGGGCCATCAAGGCCAAAAACGGCGGCGTTTTCCCACGCCATGACGCGAAGCCAGCGGCTGTGACCCAACCCCAGAAGCCGCCCAAGTTCTATCCTGCCGATGACGTCAAGAAGCCGCTTGTCAACAAGCGCAAGGCTAAGCCCACCAAGCTCAGGGCTAGTATTACACCAGGGACTGTGTTGATTATATTGGCTGGAAGGTTTAAGGGCAAGAGAGTTGTTTTTCTTAAGCAGCTCCCATCTGGGTTGCTTCTTGTTACTGGGCCCTTCAAAATTAATGGTGTTCCTTTGAGACGT…	MAAKARNPRKTRNPDLVRGVGKFSRSKMYHKRGLWAIKAKNGGVFPRHDAKPAAVTQPQKPPKFYPADDVKKPLVNKRKAKPTKLRASITPGTVLIILAGRFKGKRVVFLKQLPSGLLLVTGPFKINGVPLRRVNQAYVIGTSTKVDISGVNVEKFDDKYFAKEVEKKKKKGEGEFFEAEKEEKNVIPQGKKDDQKSVDASLIKSIEAVPDLKTYLAARFSLKSGMKPHELVF	236.312	AT1G74050.1	5e-123		Ribosomal protein L6 family protein			60S ribosomal protein L6-3
LOC18771344	PRUPE_7G053100	ATGTCTGGATACCCACACCCGCCCCCCGGCTACGGCTACGGCAGCACGCCTCCACCAGGCAAACCCTACGCCGCGCCGCAGCCAGGCCAGCCAGGCCAACCCGGCCAGCCCCACCAACACCAAGCGCAACCGTACGGAGCGCCGGCTGCACCTTATGGCGCGCCGTCTGCACCCTACGGCGCACCATCGGCACCGTACGCCGCGCCGTACGCGCCAGAGAAGCCTCACCAGAGCCACGGAAGCAGCGGGGGTGGATACCCGCCGTCGGCTCCGGGCTACGGAAGCCCGTTCGCGGCTCTGGTGCCATCGTCGTTCCCACCCGGTACGGACCCGAATGTGGTGGCGTGCTTTCAGATGGCGGATCAGGACGGCAGTGGCTTCATCGACGACAAGGAGTTG…	MSGYPHPPPGYGYGSTPPPGKPYAAPQPGQPGQPGQPHQHQAQPYGAPAAPYGAPSAPYGAPSAPYAAPYAPEKPHQSHGSSGGGYPPSAPGYGSPFAALVPSSFPPGTDPNVVACFQMADQDGSGFIDDKELQRALSSYNQSFSLRTVHLLMYLFTQTNTRKIGPKEFTAVFYSLQSWRGIFERFDRDRSGHIDATELRDALLSLGFSVSPTVLDLLVSKFDKTGGKHRAIEYDNFIECCLTVKGLTEKFKEKDKAYTGTGTFSYEDFMLTVLPFLIA	302.183	AT3G10300.3	4e-120		Calcium-binding EF-hand family protein			probable calcium-binding protein CML49
LOC18771354	PRUPE_7G161100	ATGGCGCATTTTGGTTCAACACCCGAGCCTACTAAGACTGATGAGTATGGGAACCCGGTTCATCACACCACCACCGGAACCGGTCGGACAGACGAGTTCGGGAACCCGGTTCAGCACGGCGTGGCGGATACCGGGTACGGAACTGGTGCAGGGTACGGCACTCATACAAAACCTGGTGTTGTTGAGCACCACGGCGTCCCTGCTGTGCTTCATTCCAAGGATGACCAGTACTCTCGTGATACCCAGACAACCACTGGAGGTTACGGTGGGGACGGGTACACAGGAGGAGAGCACCAGGAGAAGAAGGGTTTACTAGGCCAACTCCAGGACAAGCTGCCAGGTGGGAACAAGGATGGCCAGTACTCTCATGACACCCAGACAACCACTGGAGCTTACGGT…	MAHFGSTPEPTKTDEYGNPVHHTTTGTGRTDEFGNPVQHGVADTGYGTGAGYGTHTKPGVVEHHGVPAVLHSKDDQYSRDTQTTTGGYGGDGYTGGEHQEKKGLLGQLQDKLPGGNKDGQYSHDTQTTTGAYGGAGYTGGEHHEKKGIIGQVKDKLPGGQKDDQYCRDTHPTTGAYGGAGYTGGEDHEKKGIIGQVKDKLPGGQKDDQYCRDTHPTTGAYGGAGYTGGEHQEKKGIIGQVKDKLPGGQKDDQYSHDTHKTTGAYGGAGYTGDDTREKKGIIGQVKDKLPGGQKDDHYSHDTHPTTGAYGGAGYTGDDTREKKGIIDQVKDKLPGGQKDDHYSHETHPTTGAYGGAGYTGDDTREKKGVVEKVKEKLPGGQNVHPTTGPYGGGGAAGIGE…	215.216	AT3G50980.1	2e-14	XERO1	dehydrin xero 1			cold shock protein CS66
LOC18771356	PRUPE_7G226700	ATGGTGGGAGGCGGGAACCGAAAGGACGAGTCTGTGGTTCTGAATAGCACCAACGTGTTTGCGGCGCTCGGGAGCTTGAAGAAGAAGAAGAAGTCCGAGAAGGGTTCCTCCAAGAGCTCGAAAAGCGGCACAGCTCAGAATCCTGAGGAGGCCGAAAAAGAGGTGTTTTGGGCCCCTGCGCCCCTCAACGTGAAATCGTGGGCCGATGTCGATGACGAGGACGAGGACGACTACTATGCAACTACAGCTCCGCCCGAATTGGGCTGGGCTGGTGAGGATTCAAAGGTGGCCAAGGAGACTGAGCATGAAGCTGAGCATGTGGAAGTCGGTGAACTGGTAAGTGAAAGCGAGGAGGAAGGACTTGATGAAGTTGATGATGTCGACGAGGAACATGAAAAT…	MVGGGNRKDESVVLNSTNVFAALGSLKKKKKSEKGSSKSSKSGTAQNPEEAEKEVFWAPAPLNVKSWADVDDEDEDDYYATTAPPELGWAGEDSKVAKETEHEAEHVEVGELVSESEEEGLDEVDDVDEEHENELEAPVETEPLKKPLEASPAPKDTERQLSKKELKKKGLEELEAVLAELGYGAKSETGGQDDSSGIAQEKKVENLNGEVDKKENATGESKSAKKKKKKDKSLKEPKESPDQPDGIDVAAADEDAGTDKGENTSAGDVKERLKKVASMKKKKSSKEMDAAARAAASEAAARNARLAAAKKKEKNHYNQQPVR	201.344	AT2G25670.2	6e-35		BEST Arabidopsis thaliana protein match is: copper ion binding (TAIR:AT4G32610.1); Has 43784 Blast hits to 26928 proteins in 1799 species: Archae - 86; Bacteria - 6347; Metazoa - 15971; Fungi - 5398; Plants - 1931; Viruses - 259; Other Eukaryotes - 13792 (source: NCBI BLink).			uncharacterized
LOC18771370	PRUPE_7G264100	ATGTTAGAACAGTTACTCATATTTACTAGAGGAGGTTTAATCCTTTGGACATGCAAGGAGCTTGGAAATGCTCTTAAAGGATCTCCAATTGACACCTTGATCCGATCCTGTCTTCTAGAGGAACGGTCTGGTGCAGCTTCTTTCGATTACAACGCCCCTGGGGCCGCTTACACCCTCAAATGGACCTTCCATAACGAGCTTGGCCTTGTATTCGTCGCTGTTTATCAAAAGATCCTCCATCTATTGTATGTGGACGAATTGCTTGCAATGGTAAAGCATGAATTCTCAGGGATTTATGATCCGAAAAGAACAGTCTACTCTGATTTCGGCGAAACTTTTCGACAACTTAAGAAGGAGGCTGAGGCTCGTGCTGAGGAATTAAAGAAGTCAAAGCAGGTG…	MLEQLLIFTRGGLILWTCKELGNALKGSPIDTLIRSCLLEERSGAASFDYNAPGAAYTLKWTFHNELGLVFVAVYQKILHLLYVDELLAMVKHEFSGIYDPKRTVYSDFGETFRQLKKEAEARAEELKKSKQVGKPVNNSKKQGQVQKAGLGGDKKKNEGGLASDGGDGDTMKGRRLENGNSNGNHVDIKESNVFGTANGKENTSSNLGAFDVNKLQKLRSKGGKKAEKTVTVDSNGSKAEPKKKITKKNRVWDDSPPESKLDFTDPVDENGDNNTEVVAADHGESMMDKEEDFSSESEAEEEEEGEVGKESKPDKQKKGWFSSMFQSIAGKANLERSDLEPALKALKDRLMTKNVAEEIAEKLCESVATSLEGKKLASFTRISSTVQAAMEEALVRIL…	202.923	AT4G30600.1	0		signal recognition particle receptor alpha subunit family protein			signal recognition particle receptor subunit alpha homolog
LOC18771413	PRUPE_7G260600	ATGTCAGGAGAAGAAGAAGTTGTTGTTGCTGCTGAGCCTGCTGCTGCTGCTGCTGTTCCAGCTCTAGGTGAGCCCATGGACCTTTTGACAGCATTGCAACTTGTGCTGAGAAAGTCGTTGGCTCATGGTGGGCTCACACGTGGACTCCACGAAGGTGCAAAGGTCATCGAGAAGCACGCTGCACAGCTCTGTGTGTTAGCTGAGGACTGTGATCAGGCCGATTATGTCAAGCTGGTCAAGGCGCTATGTGCTGACCATAATGTTAAATTGATATCAATTCCTAGTGCTAAAACTCTTGGAGAATGGTCTGGTCTTTGTAAGATTGATTCAGAGGGAAAGGCTAGAAAGGTTGTTGGTTGCTCTTGCGTTGTTGTGAAGGATTATGGGGAAGATACAGAA…	MSGEEEVVVAAEPAAAAAVPALGEPMDLLTALQLVLRKSLAHGGLTRGLHEGAKVIEKHAAQLCVLAEDCDQADYVKLVKALCADHNVKLISIPSAKTLGEWSGLCKIDSEGKARKVVGCSCVVVKDYGEDTEGLHVVQEYVKSH	658.182	AT2G32060.2	2e-60		Ribosomal protein L7Ae/L30e/S12e/Gadd45 family protein			40S ribosomal protein S12
LOC18771450	PRUPE_7G097900	ATGGCTGCCTCCACCGCTCTCATTTCCTCAACCCCATCTAGGGCTTTCTCCTCCAAATCCACGCCTCTCGTCGCGTCTTCCTCCATTTCCAAGCCCATCTCCCAAACCCTAACCTTCCCCAAATCCTTCAATGGCCTCCGCCTACCACGCGTCGCCCATTCGGTTTCTCTCTCCCGGGGCGCTCATTCCAGAAGGTCCTTCCTCGTCAAAGCTTCTGTGGATGAGCTTCCTCTGGTTGGAAACGTAGCTCCTGATTTTGAGGCTGAGGCTGTTTTCGACCAGGAATTCATCAAGGTCAAGCTCTCTGAATACATTGGGAAGAAATATGTGATTCTGTTTTTCTACCCACTGGACTTCACATTTGTTTGCCCCACAGAAATCACTGCTTTCAGCGATCGT…	MAASTALISSTPSRAFSSKSTPLVASSSISKPISQTLTFPKSFNGLRLPRVAHSVSLSRGAHSRRSFLVKASVDELPLVGNVAPDFEAEAVFDQEFIKVKLSEYIGKKYVILFFYPLDFTFVCPTEITAFSDRHAEFEELNTEILGVSVDSVFSHLAWVQTDRKSGGLGDLNYPLISDVTKSISKSYDVLIPDQGIALRGLFIIDKEGVIQHSTINNLAIGRSVDETKRTLQALQYVQDNPDEVCPAGWKPGEKSMKPDPKLSKEYFSAI	372.837	AT5G06290.1	7e-142	2-Cys Prx B, 2CPB	2-cysteine peroxiredoxin B			2-Cys peroxiredoxin BAS1, chloroplastic
LOC18771511	PRUPE_7G110300	ATGAGTAAGCTCTCAAGTGACGGGCTGAGAGAGGCCATCGCTCAGATTAAGACAAACTCAGAAACGAAAAAGAGAAATTTCACCGAGACAGTTGAACTTCAAATTGGGTTGAAGAACTATGACCCACAAAAGGATAAGCGTTTCAGTGGCTCTGTCAGGCTTCCACATATTCCTCGTCCTAAGATGAGGGTTTGCATGCTTGGGGATGCTCAGCATGTTGAAGAGGCAGAGAAGATGGGTTTGGACTACATGGATGTGGAAAGCTTGAAAAAGCTTAACAAAAACAAGAAACTGGTCAAGAAGCTTGCCAAGAAATACCATGCCTTTTTAGCTTCTGAAGCTGTCATTAAGCAAATTCCTCGTCTTCTAGGCCCTGGTCTTAATAAGGCAGGTAAGTTT…	MSKLSSDGLREAIAQIKTNSETKKRNFTETVELQIGLKNYDPQKDKRFSGSVRLPHIPRPKMRVCMLGDAQHVEEAEKMGLDYMDVESLKKLNKNKKLVKKLAKKYHAFLASEAVIKQIPRLLGPGLNKAGKFPTLVSHQESLEAKVNETKAMVKFQLKKVLCMGVAVGNLAMEEKQIFQNVQLSVNFLVSLLKKNWQNVRSLNLKSTMGKAIRIY	529.981	AT1G08360.1	1e-123		Ribosomal protein L1p/L10e family			60S ribosomal protein L10a-1
LOC18771517	PRUPE_7G264300	ATGGCGTCGACGATTTCTCTGATTGGCCAGATATCGAGCCCACATGGACTTGGACTTGACGTCTCCCAAAGACCCAGCACCCCCTTCTCACTCTCCCGCTATAACTTAAGTTCAAAGACAAATTTACAGAGCTTATCTCATTCTGGTTACCGACACTTTGGGCATATTCAGAGATCTGTCCTTGTTAATGGTCTTTTTGGCGGAAAGAAAGAAAATAATGAGAACAGTGATGATGCGCCTTCAAAGGCAGGAGTTCTTGGAAACATGCAAAATCTATATGAGACTGTGAAGAAGGCACAAATGGTTGTCCAAGTTGAAGCAGTGCGGGTGCAAAAAGAACTTGCTGTAGAAGAGTTTGATGGTTACTGCGAAGGGGAGTTAATAAAGGTTACTCTGTCT…	MASTISLIGQISSPHGLGLDVSQRPSTPFSLSRYNLSSKTNLQSLSHSGYRHFGHIQRSVLVNGLFGGKKENNENSDDAPSKAGVLGNMQNLYETVKKAQMVVQVEAVRVQKELAVEEFDGYCEGELIKVTLSGNQQPVRTEITEAAMELGPEKLSLLITEAYKDAHQKSVQAMKERMSNLAQSLGMPQGLTPQ	264.632	AT4G30620.1	9e-77		Uncharacterised BCR, YbaB family COG0718			nucleoid-associated protein At4g30620, chloroplastic
LOC18771543	PRUPE_7G086600	ATGGCTGCTCCTGCCGTAGATGCTCCTGTCGCAGCTGCTCCTGTCGTAGTTGCTTCTGTTGTGGAACCAACGGAGCCTCACTTTGACGTGAAGCTGTTCAACCGCTGGAGCTTTGATGATGTTCAGGTCAGTGACATTTCATTGGCAGACTATGTTGGAGTGGTACCTGCCAAGCATGCAACCTATGTGCCTCACACTGCTGGGAGATACTCAGTCAAACGATTCAGGAAGGCTCAGTGCCCTATTGTGGAGAGGCTTACTAACTCACTCATGATGCACGGCAGAAACAATGGAAAGAAACTCATGGCTGTCAGGATTATTAGGCATGCTATGGAAATTATCCATTTGCTGACTGATCAGAACCCCATTCAAGTTATTGTTGATGCTGTTGTTAATAGT…	MAAPAVDAPVAAAPVVVASVVEPTEPHFDVKLFNRWSFDDVQVSDISLADYVGVVPAKHATYVPHTAGRYSVKRFRKAQCPIVERLTNSLMMHGRNNGKKLMAVRIIRHAMEIIHLLTDQNPIQVIVDAVVNSGPREDATRIGSAGVVRRQAVDISPLRRVNQAIYLLTTGARESAFRNIKTIAECLADELINAAKGSSNSYAIKKKDEIERVAKANR	242.434	AT2G37270.2	5e-131	ATRPS5B, RPS5B	ribosomal protein 5B			40S ribosomal protein S5
LOC18771647	PRUPE_7G268100	ATGGCGGATACCAAAGCGGTCACGATCCGTACGAGGAAGTTCATGACCAACCGTCTTCTCTCGAGAAAGCAATTCGTTATCGATGTCCTACATCCAGGAAGACCGAATGTTTCCAAGGCGGAGTTGAAGGAGAAACTAGCAAGGTTGTATGAAGTGAAGGATCCAAATTCCATCTTTGTTTTCAAGTTCCGCACCCATTTTGGAGGGGGCAAATCCACTGGTTTTGGTTTGATCTATGATTCTGTCGAGAATGCAAAGAAGTATGAGCCAAAGTACAGGCTGATCAGGAATGGACTGGATACAAAGGTGGAAAAGTCAAGGAAGCAACTTAAGGAAAGGAAGAACAGATCCAAGAAGATCCGCGGAGTAAAGAAGACCAAGGCCGGTGATGCTGCCAAG…	MADTKAVTIRTRKFMTNRLLSRKQFVIDVLHPGRPNVSKAELKEKLARLYEVKDPNSIFVFKFRTHFGGGKSTGFGLIYDSVENAKKYEPKYRLIRNGLDTKVEKSRKQLKERKNRSKKIRGVKKTKAGDAAKAGKKK	294.434	AT5G28060.1	4e-81		Ribosomal protein S24e family protein			40S ribosomal protein S24-1
LOC18771652	PRUPE_7G250900	ATGGGCAAGAGGAAGCTGCCCTCTGATCACAGCCAGACCCACCCTCCCCCTTTCTCTCCTCATCCTTCGGATCTTGCAGACATCATGCCATGTTCTTCGGGAATGGAATTACTGTCACAAGAGAAACCTTTGCATTCTGTTGATTCTGGCGAACAACTAAAGTCCCTGTCATCTGTACTGGACTCTACGGATAGTTCTTTGAAGCTACTAAACGCCCACCCTTCTGTTGCACAGCAGCATCATCCAAGCCTTGGCCGATCAACCTTCTTTAAACGCTCACGTCATCACTATGCCCATCAATACTCTCGCCGTAACTCAGGCAATCTTGCTAACACATCAACTTCTCGTGGAAAAGGAGTACCTTTACGTGATGATAAGCTCTCTTATAAGTTGGCTACT…	MGKRKLPSDHSQTHPPPFSPHPSDLADIMPCSSGMELLSQEKPLHSVDSGEQLKSLSSVLDSTDSSLKLLNAHPSVAQQHHPSLGRSTFFKRSRHHYAHQYSRRNSGNLANTSTSRGKGVPLRDDKLSYKLATQSNSESRRHSEIRENPFLRQPRIRSSYLTTDAASPDPGKMVCEICEKLLRRKPFLLGSTLSSTEVSVVAVLGCGHAYHADCLEQKTSFEDRRDPHCPLCLGLLPKVEDSREQV	202.444	AT1G75400.1	7e-11		RING/U-box superfamily protein			uncharacterized
LOC18771668	PRUPE_7G063200	ATGTCTGCAAAATACATCGTTTCTGCTGTATTTGGATCAATTGCTGTGGCATGGACATGCGACTATCTTATGGCTGACAAGAAAATATTTGGAGGAACTACTCCAACAACTGTTGCAAGCAAAGAATGGTGGGAAGAAACTGACAAGAAGTTCCAGGCATGGCCTCGTACTGCCGGTCCACCAGTGGTCATGAACCCCATCAGTCGTCAGAATTTCATTGTCAAGTCTCGTGTTGATTGA	MSAKYIVSAVFGSIAVAWTCDYLMADKKIFGGTTPTTVASKEWWEETDKKFQAWPRTAGPPVVMNPISRQNFIVKSRVD	924.249	AT1G01170.2	3e-35		Protein of unknown function (DUF1138)			uncharacterized
LOC18771674	PRUPE_7G215000	ATGGTTGAGAAGACAAAGGGAAGGAAGGAGGAGGTGGTGACCAGAGAGTACACCATCAATCTCCACAAGCGCCTCCATGGCTGCACATTCAAGAAGAAGGCTCCTAATGCCATAAAGGAGATCAGGAAGTTCGCTCAGAAGGCAATGGGGACAAATGATGTTAGGGTGGATGTGAAGCTGAACAAGCAGATCTGGAGCAGAGGAATCAGGAGCGTCCCAAGAAGGATTAGGGTTCGCATTGCTCGCAAGAGGAATGATGATGAAGATGCCAAGGAAGAGCTTTACTCACTTGTTACCGTTGCAGAGATCCCAGCTGAAGGACTGAGTGGGTTGGGCACCAAGGTCATTGAAGAGGATGATTGA	MVEKTKGRKEEVVTREYTINLHKRLHGCTFKKKAPNAIKEIRKFAQKAMGTNDVRVDVKLNKQIWSRGIRSVPRRIRVRIARKRNDDEDAKEELYSLVTVAEIPAEGLSGLGTKVIEEDD	1778.56	AT2G19740.1	2e-72		Ribosomal protein L31e family protein			60S ribosomal protein L31
LOC18771680	PRUPE_7G166200	ATGGCGTCATCCACGTTCAGCGGCGACGAAACGGCGCCGTTCTTCGGCTTCCTCGGCGCCGCGGCCGCCCTAGTTTTCTCCTGTATGGGAGCGGCGTACGGGACGGCGAAGAGCGGCGTGGGCGTGGCGTCGATGGGGGTAATGAGGCCAGAGCTGGTCATGAAATCGATTGTTCCGGTGGTTATGGCGGGAGTGTTGGGTATCTATGGTTTGATCATTGCTGTGATTATCAGCACTGGGATTAACCCGAAGGCCAAATCTTATTACCTTTTCGATGGCTATGCCCACCTCTCCTCCGGCCTCGCTTGCGGCCTCGCCGGACTTTCCGCCGGAATGGCCATCGGAATCGTCGGCGATGCCGGTGTTAGGGCGAATGCGCAACAGCCAAAGCTTTTTGTT…	MASSTFSGDETAPFFGFLGAAAALVFSCMGAAYGTAKSGVGVASMGVMRPELVMKSIVPVVMAGVLGIYGLIIAVIISTGINPKAKSYYLFDGYAHLSSGLACGLAGLSAGMAIGIVGDAGVRANAQQPKLFVGMILILIFAEALALYGLIVGIILSSRSGQSRAD	1053.12	AT1G75630.1	9e-110	AVA-P4	vacuolar H+-pumping ATPase 16 kDa proteolipid subunit 4			V-type proton ATPase 16 kDa proteolipid subunit
LOC18771689	PRUPE_7G129700	ATGGGAGGCAAGTGCCCACACAGAAGCGTCAAGAAAAGGAGATACTCTCACAAGACTCACCGCCGCGCCAAATTCCTCGTCAATGGTGATGATATGGTGTATGATAGTCTGAATAAGGCAGATGAGCAGACGAAGCCATTGCCTCCTGATCAAGATCTCCCTGGGATGGGTCAATTCTACTGTCTTCACTGCGACCGGTACTTCAATAATGCGGCGGTGAGGGATGACCATTTCAAGACAAAGCGTCACAGGAGGCGTGTAAAGCTGCTGATGGAAGCACCACACACCCAGCTGGATGCTGATTTAGCTGCTGGGATGGGTATGCCTGATAATGGTCCCAAGCTTATGTCTTTCTGA	MGGKCPHRSVKKRRYSHKTHRRAKFLVNGDDMVYDSLNKADEQTKPLPPDQDLPGMGQFYCLHCDRYFNNAAVRDDHFKTKRHRRRVKLLMEAPHTQLDADLAAGMGMPDNGPKLMSF	268.411	AT2G36930.1	2e-56		zinc finger (C2H2 type) family protein			zinc finger protein 593
LOC18771700	PRUPE_7G132200	ATGGCTTCTGCAACCCAACCCAACCTCCTCCTCTGTTTCTTCCTGCTTTTTCTCTACTTGGGTCCATTTGTCAGCGCTCAGATTGAAGAGACCAGCTTGAAGTTGGTGGCAGAGGCTCTGGAGTGGCCTAGCTCCACAATGTTACCACTCTACGACGAGCTCGATGAGGAGGCGGAGGAAGACGGCGGCGAGGACATGGAGCTGGACATAGAACATGGGTACGCACGCAGATCTCTGTTCTGGCGGAGGATGAAGTACTACATTTCGTACGGGGCTCTCTCGGCCAACCGCATCCCCTGCCCGCCGAGGTCAGGGAGGTCTTATTACACCCACAACTGCTTCAAAGCCAGAGGCCCTGTTCGTCCGTACACCCGAGGCTGCTCTAGGATCGCCAGATGC…	MASATQPNLLLCFFLLFLYLGPFVSAQIEETSLKLVAEALEWPSSTMLPLYDELDEEAEEDGGEDMELDIEHGYARRSLFWRRMKYYISYGALSANRIPCPPRSGRSYYTHNCFKARGPVRPYTRGCSRIARCRR	1118.8	AT5G67070.1	3e-38	RALFL34	ralf-like 34			protein RALF-like 34
LOC18771718	PRUPE_7G082200	ATGGCCACCACCTCGTTCCTCTCGAGCTTGAAGTACTCAGACGGCCTAACAGTGGTGGGCATCTCGTTCTGCACCGCCATAGTCTGCGAGGCGATCTCATGGGTCCTCATCTACCGCACCAACTCCTACAAGTCCCTGCGCTCCTCCATTGACAAAGCCGCGAAGAAGCTCGAGACCATGAAGACCGATCCCGCCATCAAAATCGCCAAGAAGTCCAAGACCAAGAAGATCGACCGAGTAGAGACGAGCTTGAAAGAATCGAGTCGCGACCTCTCGCTCTTCAAGTTCAAATCCGGCGCCGTCGTCGCGCTCGTGCTGTTCGTCGTCTTTGGGCTGCTCAACTCGCTGTTTGAGGGGAAGGTGGTGGCGAAATTACCGTTTAAGCCCTTTGGGTTGGTG…	MATTSFLSSLKYSDGLTVVGISFCTAIVCEAISWVLIYRTNSYKSLRSSIDKAAKKLETMKTDPAIKIAKKSKTKKIDRVETSLKESSRDLSLFKFKSGAVVALVLFVVFGLLNSLFEGKVVAKLPFKPFGLVMKMSHRGLQGEDSTDCSMAFLYFLCSISIRTNLQKFLGFSPPRGASSGLFPMPDPKTN	317.874	AT5G06660.1	5e-101		Protein of unknown function DUF106, transmembrane			calcium load-activated calcium channel
LOC18771735	PRUPE_7G086800	ATGGACTCCACTGTGAAGCATGCTGTTGTGGTGAAAGTTATGGGCCGGACTGGATCTCGTGGGCAGGTGACTCAAGTTAGAGTCAAGTTTCTGGATGACCAGAACCGGTTCATCATGAGGAACGTCAAGGGACCAGTGAGGGAGGGGGATATCCTTACCTTGCTCGAGTCTGAGAGGGAAGCTAGAAGGTTGCGTTGA	MDSTVKHAVVVKVMGRTGSRGQVTQVRVKFLDDQNRFIMRNVKGPVREGDILTLLESEREARRLR	703.723	AT5G03850.1	4e-34		Nucleic acid-binding, OB-fold-like protein			40S ribosomal protein S28
LOC18771758	PRUPE_7G217700	ATGTCGTGGCAAACGTACGTAGACGACCATCTGATGTGCGAAATTGAAGGCAACCACCTCTCTGCCGCCGCCATCATCGGCCACGACGGCAGCGTTTGGGCCCAGAGCGCCACTTTCCCTCAGTTGAAGCCTGAAGAAGTGACTGGCATTCTGAATGACTTCAATGAACCTGGTTCACTTGCCCCAACTGGGTTGTATCTTGGAGGCACAAAGTACATGGTCATCCAAGGAGAGCCAGGAGCTGTCATTAGAGGAAAGAAGGGACCAGGTGGTGTTACTGTCAAGAAGAGCACTCTTGCTTTGCTGATTGGCATTTATGATGAGCCAATGACTCCTGGCCAATGCAACATGATTGTTGAAAGGCTTGGTGATTATCTGGTTGAGCAGGGTCTCTAG	MSWQTYVDDHLMCEIEGNHLSAAAIIGHDGSVWAQSATFPQLKPEEVTGILNDFNEPGSLAPTGLYLGGTKYMVIQGEPGAVIRGKKGPGGVTVKKSTLALLIGIYDEPMTPGQCNMIVERLGDYLVEQGL	670.955	AT5G56600.1	8e-75	PFN3, PRF3	profilin 3			profilin
LOC18771840	PRUPE_7G195700	ATGGCAACTGCATCACAGATTGTCGAGAAACTGAAACTGAATCCCCACCCAGAAGGTGGGTTTTATTTTGAAACTTTCAGAGACATCTCCATTGCCCTGCCCTTGTGCCAGCTTCCCCCAGATTACAAGGTTGAGCGCCCTGTGAGTTCTTCGATCTACTTCTTGCTGCCTTCCGGGGATGTGTCGCGCCTTCATCGTATACCAATGGCTGAAACCTGGCATTTTTATCTGGGAGAACCTATTACGATAGTGGAGTTGGATGACAAAGATGGGCAAGTCAAATTCACCTGCCTTGGACCCAATTTGATTGGAGAGGATCAGCAACCCCAGTACACGGTGCCTCCAAATGTATGGTTTGGTTCATTTCCAACAAAGGACTATAGCGTTTCACCAGATGGG…	MATASQIVEKLKLNPHPEGGFYFETFRDISIALPLCQLPPDYKVERPVSSSIYFLLPSGDVSRLHRIPMAETWHFYLGEPITIVELDDKDGQVKFTCLGPNLIGEDQQPQYTVPPNVWFGSFPTKDYSVSPDGALLKAAPRDAETHYSLVGCTCAPAFQFQDFELAKRSDLVSRFPKFEPLISFLTFPEKA	270.516	AT1G19130.1	9e-99		CONTAINS InterPro DOMAIN/s: Protein of unknown function DUF985 (InterPro:IPR009327), RmlC-like jelly roll fold (InterPro:IPR014710); Has 1465 Blast hits to 1465 proteins in 584 species: Archae - 10; Bacteria - 1038; Metazoa - 19; Fungi - 43; Plants - 51; Viruses - 0; Other Eukaryotes - 304 (source: NCBI BLink).			uncharacterized
LOC18771860	PRUPE_7G226400	ATGGCTCCGATTGCAGTCGGCGATGTGATACCGGACGGTACTCTGTCTCACTTCGACGAGGAGGACAAGGTCCAAGCGGTCAACATCCACTCTCTCGCCGCCGGTAAAAAAGTCATCCTCTTTGGCGTCCCCGGTGCCTTCACTCCAACTTGCAGTTTGAAGCATGTGCCTGGATTCATTGAGAAGGCAGACGAGCTTAAATCAAAGGGTGTTGACAAAATTCTGTGTCTTAGCGTGAATGACCCCTTTGTGATGAAGGCTTGGGCTAAATCATTCCCTGAGAACAAGCATGTCCTTTTCCTTGCTGATGGCTCAGCAAAATACACCCATGATCTTGGCCTTGAGCTTGACCTTTCGGAGAAAGGACTTGGAACTCGTTCTAGGAGGTTTGCTCTCCTA…	MAPIAVGDVIPDGTLSHFDEEDKVQAVNIHSLAAGKKVILFGVPGAFTPTCSLKHVPGFIEKADELKSKGVDKILCLSVNDPFVMKAWAKSFPENKHVLFLADGSAKYTHDLGLELDLSEKGLGTRSRRFALLVDDLKVKAANIESGGEFTVSSADDILKAL	1045.23	AT1G65980.1	2e-96	TPX1	thioredoxin-dependent peroxidase 1			peroxiredoxin-2B
LOC18771869	PRUPE_7G023000	ATGACTGTAGTGGCCAAACATAAGAGGCAGAGCAGACAGAAAAATCAAGGGCATGAGATGGAAAAGCAAGTCAAAACTAATGATAAAAGCAGCAGGCTTGCAGTAATAAGCTCTCACTTGGTTACTCCTCAAATCCCCATGGCTGCTGCTTCTGAGAAGGAGGCTGCTCTTGCGGCCGTTCCCTCTGATTCACCCACCATATTTGACAAGATCATCAACAAGGAAATACCATCCAAGGTGGTTTTTGAGGACGATAAGGTCCTTGCTTTTAGGGACATTAATCCCCAAGCGCCGACACACATTTTGATCATTCCCAAAGTTAAAGATGGCTTAACTGGACTCTCTAAGGCAGAGGAGAGACACACTGAAATTCTTGGTCAGCTTCTCTACACTGCCAAG…	MTVVAKHKRQSRQKNQGHEMEKQVKTNDKSSRLAVISSHLVTPQIPMAAASEKEAALAAVPSDSPTIFDKIINKEIPSKVVFEDDKVLAFRDINPQAPTHILIIPKVKDGLTGLSKAEERHTEILGQLLYTAKLIAKQEGLDDGFRIVINDGPNGCQSVYHLHVHLLGGRQLNWPPG	306.919	AT3G56490.1	8e-83	HIT3, HINT1	HIS triad family protein 3			14 kDa zinc-binding protein
LOC18771889	PRUPE_7G171600	ATGGCTTCCACGGCCAGCCCATTCTCTATCTCCGTCTCTTCCAAGCCGACCCTGAAAGCTTCTGTCTTCACGCCCAACAACTCGGCCGAGCTATCTCTTCGGGTTCAGAGCTCTAAAGCCGCTTCTCTGCGGTCTTCGTTCGTTTCGCAGGGCTCCGTTGAGTTGACTCGGCGCGGGAACTCGGCGTTGAGAGCGAGTCGAGTGAGATCGACGTCGAGGATTATGGCGAGTTCGGCGCAGGTGGTTGATCAACCGCCAAGTAAAACGGGTCCTGTGGCTCCCACCATTGTGGACGTCGATTTGGGTAATCGGAGCTACCCAATTTACATCGGATCCGGACTTCTTGATCAACCCGAACTTCTTCAGAGGCATGTTCATGGAAAGAAGGTTCTTGTGGTC…	MASTASPFSISVSSKPTLKASVFTPNNSAELSLRVQSSKAASLRSSFVSQGSVELTRRGNSALRASRVRSTSRIMASSAQVVDQPPSKTGPVAPTIVDVDLGNRSYPIYIGSGLLDQPELLQRHVHGKKVLVVTNNTVGPLYLDKVVDALTRDNPNVSVESVILPDGEKYKNMDTLMKVFDKAIESRLDRRCTFVALGGGVIGDMCGFAAAAFLRGVNFIQIPTTVMAQVDSSVGGKTGINHPLGKNLIGAFYQPQCVLIDTDTLNTLPERELASGFAEVIKYGLIRDAEFFEWQERNIQALMSRDPGALAYAIKRSCENKAEVVSLDEKESGLRATLNLGHTFGHAIETGVGYGQWLHGEAVAAGTVMAVDMSYRLGWIDESLVKRANNIIKQFKLPV…	526.201	AT5G66120.2	0		3-dehydroquinate synthase, putative			3-dehydroquinate synthase, chloroplastic
LOC18771939	PRUPE_6G064900	ATGCGTGAGATTCTTCATATCCAGGGAGGCCAATGCGGTAACCAGATCGGAGCCAAGTTCTGGGAGGTGGTCTGCGCCGAGCACGGCATAGACTCCACCGGGCGCTACCATGGCGACTCTGAGCTTCAGCTTGAGCGAGTCAACGTATACTACAACGAAGCCAGTGGTGGTCGATATGTTCCTCGAGCTGTGCTCATGGATCTGGAGCCTGGCACCATGGACAGCATCAGATCTGGGCCATATGGCCAGATCTTCCGACCTGATAACTTCGTTTTCGGTCAATCTGGTGCTGGAAACAACTGGGCCAAAGGCCATTACACTGAGGGTGCAGAGTTGATCGATTCGGTTCTAGATGTGGTTCGCAAAGAGGCGGAGAATTGTGACTGTTTGCAAGGGTTT…	MREILHIQGGQCGNQIGAKFWEVVCAEHGIDSTGRYHGDSELQLERVNVYYNEASGGRYVPRAVLMDLEPGTMDSIRSGPYGQIFRPDNFVFGQSGAGNNWAKGHYTEGAELIDSVLDVVRKEAENCDCLQGFQVCHSLGGGTGSGMGTLLISKIREEYPDRMMMTFSVFPSPKVSDTVVEPYNATLSVHQLVENADECMVLDNEALYDICFRTLKLTTPSFGDLNHLISATMSGVTCCLRFPGQLNSDLRKLAVNLIPFPRLHFFMVGFAPLTSRGSQQYRALTVPELTQQMWDSKNMMCAADPRHGRYLTASAMFRGKMSTKEVDDQMMNVQNKNSSYFVEWIPNNVKSTVCDIPPTGLKMASTFIGNSTSIQEMFRRVSEQFTAMFRRKAFLHWYT…	1013.94	AT5G23860.2	0	TUB8	tubulin beta 8			tubulin beta chain
LOC18771942	PRUPE_6G297600	ATGTCGGCCACTGCCCAGCTTCGTTACTCTACTGTTGCTCGACACCACTCTAATCCCTCCGATAATCGCCGTTTCTCCAACAACCCTAATTCCTCCATCTCCTTTCCCTACTCTAAAACCCTAAATCGGGCAATCTCGTTTGTCCCCAAGCCCATTTGGGATGGAAAGCCAGAGCTTTCGTTTTCCGGCGGAAATGGCGACGGCCACTCCGGCGCCGGAGCTGGTGGAAACAGCGGAGGCTGGAGCCGCGGCGGCGGAGATGGGAATTCCGATGATTCGTCGCCTTCATCTTCGTCGGCGTTTCAGGGTTTTGGAGTTCTGGGTATGTTTCTCAACGGTTGGAGATCTCGAGTTGCAGCCGATCCCCAATTCCCTTTCAAGGTTCTGATGGAGGAAGTG…	MSATAQLRYSTVARHHSNPSDNRRFSNNPNSSISFPYSKTLNRAISFVPKPIWDGKPELSFSGGNGDGHSGAGAGGNSGGWSRGGGDGNSDDSSPSSSSAFQGFGVLGMFLNGWRSRVAADPQFPFKVLMEEVVGVSSCVLGDMASRPNFGLNELDFVFSTLVVGSILNFTLMYLLAPTLSASAATLPSIFASCPASHMFEPGSYGLVNRLGTFVYKGAVFAAVGFAAGLAGTALSNGLIKLRKKMDPNFETPNKPPPTLLNALTWAAHMGISSNLRYQTLNGAEFLLEKGLPPLAFKTSVVVLRCLNNVLGGVSFVVLARLTGSQSVGEAKSVDGGGEVGSAAEKEKLVEESEDLQSNQSTYK	252.864	AT3G08640.1	4e-128		Protein of unknown function (DUF3411)			protein RETICULATA-RELATED 3, chloroplastic
LOC18771964	PRUPE_6G239600	ATGGCTGACGAGTTCGAGTTCGCGGACAAGGTTCCTCCTTCGTTCGATGGCGTGGCTGCTGCAAAAGGGTTTAACCCTGGATTGATAGTGTTGCTTGTTGTTGTTGGACTACTGGTGATTTTCCTGGTTGGAAACTACGCACTTTACGTGTATGCTCAGAGAACTGTTCCCCCTAAAAAGAAGAAGCCGGTGTCAAAGAAGAAGCTGAAAAGGGAGAGACTGAAGCAAGGCGTTTCTGCTCCAGGAGAGTAA	MADEFEFADKVPPSFDGVAAAKGFNPGLIVLLVVVGLLVIFLVGNYALYVYAQRTVPPKKKKPVSKKKLKRERLKQGVSAPGE	416.943	AT2G37120.1	1e-12		S1FA-like DNA-binding protein	TF		DNA-binding protein S1FA
LOC18771978	PRUPE_6G092900	ATGAGGTTCAGCAACCACTTGATTGGGCTACTAAATTTCGCTACTTTCCTCCTCTCAATCCCAATCCTTGGAGGGGGCATATGGCTGAGCAGCAGAGCCAACAACACAGACTGCCTCAAGTTCCTCCAATGGCCGCTCATCATCATCGGGGTCTCGATCATGGTGGTTTCCCTAGCTGGGTTTGCAGGAGCCTGCTACAGGAACACTTTCCTCATGTGGGTTTACCTGTTCGTCATGTTCTTCATCATAGCAGCTCTGATTGGCTTCATCATCTTCGCATATGCTGTCACAGACAAAGGATCAGGCAGGCCTGTGACGAACAGGGCATATGTGGAATATTATCTGGGGGACTATTCCGGCTGGCTGGAGGAGCATGTAGCTAAGGACAGCAACTGGAGA…	MRFSNHLIGLLNFATFLLSIPILGGGIWLSSRANNTDCLKFLQWPLIIIGVSIMVVSLAGFAGACYRNTFLMWVYLFVMFFIIAALIGFIIFAYAVTDKGSGRPVTNRAYVEYYLGDYSGWLEEHVAKDSNWRKIASCVRDSKVCQKMGRTVSGVPQTADMFYNRKLSSVQSGCCKPPTECGYTYVNETTWETGGGMMGTNPDCALWNNDQRQLCYSCNSCKAGVLASLKKSWRKVSVINIVVLIILVIFYVIGCAAFRNNRRIDNDEPYGEARMTKSQPSAFQL	207.61	AT3G45600.1	5e-165	TET3	tetraspanin3			tetraspanin-3
LOC18771982	PRUPE_6G098200	ATGGCTCGAGGCACATCTCAGTCCCAAACGACGGCGTCCTCCTCCACCTCACGCCCCGGCGTAATGGCTCCCCGCGGCTCTGCCGCCGCTACGGCCGGAATGCGCCGCCGTCGCATAGGAGGCTCTACCAGCTCCGGCAGCGTCGGCGGAGGCGGAGGCGGGTCTGGTGCTGGCAACAACATGCTCAGGTTCTACACAGATGACGCTCCTGGATTGAAGATCACGCCGACTGTTGTTCTCGTCATGAGCCTTTGCTTCATCGGCTTCGTTACGGCTCTTCATGTGTTCGGCAAGCTCTATCTCCACCGATCCGGTGGTGGAGCTTGA	MARGTSQSQTTASSSTSRPGVMAPRGSAAATAGMRRRRIGGSTSSGSVGGGGGGSGAGNNMLRFYTDDAPGLKITPTVVLVMSLCFIGFVTALHVFGKLYLHRSGGGA	501.087	AT5G60460.1	5e-38		Preprotein translocase Sec, Sec61-beta subunit protein			protein transport protein Sec61 subunit beta
LOC18772047	PRUPE_6G055700	ATGGATCGCACACAGATTCTTCTGCTAGGGTTACCGCTCTTCCTCTTCTGCACCGACCTCCTAAACCTCTTCGCTCCACCTCCACCTCCGCCCCATAAGCCTCCCCACCATCACCATCACCATCACCACCTTCAACACCAACCATCACCAGTTGCCAAAGACTTCCCCTCACAGAAACCAAGCGCTGTTGGACTCGGAGCCGGCAGCACAGTCAAGATTAGTTTCTGCACCTCTTGCTCTTACAAGGGGAATGCACTAACAATAACAAAGATGTTGGAGTCTTCTTTTCCTGGAATTCATGTTGTTCTTTCGAATCACCCCCCACCCCTTCCAAAGCGTGTGCTCAGCAAGTTGGTTCCCGTTGCTCAAGTTGGAGTTTTTGGGATAGTAATGGCGGGC…	MDRTQILLLGLPLFLFCTDLLNLFAPPPPPPHKPPHHHHHHHHLQHQPSPVAKDFPSQKPSAVGLGAGSTVKISFCTSCSYKGNALTITKMLESSFPGIHVVLSNHPPPLPKRVLSKLVPVAQVGVFGIVMAGEHIFPMLGIMTPPPWYYSLRANRFGTIASTWLLGNALQSFLQGTGAFEVFLNDELVFSKLKEGRFPGEIELRDDIAAKLGSSRITDGLGAAAP	553.085	AT3G47300.1	8e-93	SELT	SELT-like protein precursor			selT-like protein
LOC18772051	PRUPE_6G192700	ATGGCCCGTACCAAGCAAACTGCTCGTAAGTCAACTGGAGGAAAGGCTCCAAGGAAGCAGCTCGCTACCAAGGCTGCCCGTAAGTCTGCACCGACCACTGGAGGAGTCAAGAAGCCCCACAGATACCGCCCTGGTACTGTTGCTCTTCGTGAAATTCGTAAGTACCAGAAGAGTACTGAGCTCCTGATCAGGAAGTTGCCATTCCAGAGGCTTGTTCGTGAAATTGCCCAGGACTTCAAGACTGATCTGCGTTTCCAGAGCCATGCGGTGCTCGCACTGCAGGAGGCAGCTGAGGCTTACCTTGTGGGTCTGTTTGAGGACACCAACCTTTGTGCCATCCATGCCAAGCGTGTTACCATCATGCCGAAGGATATCCAGCTGGCTAGGAGGATCAGGGGT…	MARTKQTARKSTGGKAPRKQLATKAARKSAPTTGGVKKPHRYRPGTVALREIRKYQKSTELLIRKLPFQRLVREIAQDFKTDLRFQSHAVLALQEAAEAYLVGLFEDTNLCAIHAKRVTIMPKDIQLARRIRGERA	3017.67	AT5G10980.1	5e-95		Histone superfamily protein			histone H3.3
LOC18772061	PRUPE_6G089800	ATGGAAGACGAACCAGACACAACGCCACCCTCTCTCATCCCACCATTCCCAAGAGACTCACGCGGCTCCCTCGAAGTCTTCAACCCCTCCTCCTCCTCCACCTTCTCCACTTCCACCTCACCTTTCCGCTCCCAACACACGTGGCAAAGCTGGATAGACCCACTTGGTGGCACCACCCTCGAACCCGAGACGGTACCCAAACTCACCTCCAAGTCCACCCGAGCCGACGACATCACCACCTCATGGTTGGCCCTCAAGGACGACGACGCCCCCCCAACAGCCCCATCTCCACCGTCCATTCACCACACAATCTCCGCCGTCGACGGGAACGACAAGTCGTCCGCTCCCTCCGACGACGCTGCGCAGAGAGCCGCGGAGTGGGGGCTGGTGCTGAAGACG…	MEDEPDTTPPSLIPPFPRDSRGSLEVFNPSSSSTFSTSTSPFRSQHTWQSWIDPLGGTTLEPETVPKLTSKSTRADDITTSWLALKDDDAPPTAPSPPSIHHTISAVDGNDKSSAPSDDAAQRAAEWGLVLKTDTETGRLQGVSARTSGGPEDPNPKPGQSAAASSRRTSNNSVQSSGEFSSDDVFGGKERGIPRASNDLKDALSTFQQTFVVSDATKPDYPIMYASAGFFKMTGYTSKEVIGRNCRFLQGAGTDPEDVAQIREALERNTSYCGRLLNYKKDGTPFWNLLTIAPIKDETGKVLKFIGMQVEVSKHTEGSKDKMLRPNGLPESLIRYDARQKEMASNSVSELVQAVKRPRSLSESMNHPLFRKSGGGRTEERTEVLARRNSESVAPPRRN…	326.676	AT3G45780.2	0	PHOT1, NPH1, JK224, RPT1	phototropin 1	Kinase		phototropin-1
LOC18772066	PRUPE_6G077900	ATGTCTTGCAGCTGTGGCTCAAACTGCTCCTGCGGCAGTGACTGCAAATGTGGAAAAAAATACCCTGACCTTGAATACTCAGAGACCACTTCTACTCAGACCATCATTGCTGGGGTTGCACCTGTGAAGATGTACTATGAGGGTTCTGAGATGAGCTATGGAGCAGAGAATGACTGCAAGTGTGGCTCAAGCTGCAGCTGCAGCTCATGCAGCTGCAACAAATGA	MSCSCGSNCSCGSDCKCGKKYPDLEYSETTSTQTIIAGVAPVKMYYEGSEMSYGAENDCKCGSSCSCSSCSCNK	1160.61	AT5G02380.1	1e-06	MT2B	metallothionein 2B			metallothionein-like protein type 2
LOC18772088	PRUPE_6G113800	ATGGGTCAGATCCAATACTCCGAGAAGTACTTCGATGATATTTACGAGTACAGGCATGTGGTTCTTCCTCAGGAAGTGGCTAAACTGCTCCCAAAAAATCGGCTTCTCTCTGAAAATGAATGGCGCGCCATTGGAGTTCAGCAGAGCCGTGGCTGGGTTCACTATGCAATTCATCGCCCAGAGCCCCACATCATGCTCTTCAGGAGGCCACTGAACTATCAGCAACAGCAGGAGAATCAAGCCCAGCAGGTGCTTGCAAAGTGA	MGQIQYSEKYFDDIYEYRHVVLPQEVAKLLPKNRLLSENEWRAIGVQQSRGWVHYAIHRPEPHIMLFRRPLNYQQQQENQAQQVLAK	384.558	AT2G27970.1	1e-48	CKS2	CDK-subunit 2			cyclin-dependent kinases regulatory subunit 1
LOC18772104	PRUPE_6G362500	ATGGCTCTGCAGACTGCTGCTGCTCTCTCTCCTCGTTCCATTAGCTCCTCAACGATGTTACCCTGCGCCGCGAAGCATCCGATCATTTATTCTTCTACTTCAAGTTCAAGCTGCTTCCTCTCGCAGGCGCAGAGGAAGAATGTGGCAGTGGGCTTCAGTGGTGTAACAACCAGTAAGAGGAAGCGGGCCTGTGCCTCTACGGTGAAGTCGAGCTTGGACACTGTAGGCCCCACTGTCAATGTGGGTCAGGTCACGGAGGTTGACAAGGACACCTTCTGGCCCATCGTCAAGGCCGCCGGCGATAAGACCGTCGTCCTCGATATGTACACGCAATGGTGTGGTCCTTGCAAGGTGATTGCTCCAAAATATCAAGAATTGTCAAAGAAATATCTTGATGTT…	MALQTAAALSPRSISSSTMLPCAAKHPIIYSSTSSSSCFLSQAQRKNVAVGFSGVTTSKRKRACASTVKSSLDTVGPTVNVGQVTEVDKDTFWPIVKAAGDKTVVLDMYTQWCGPCKVIAPKYQELSKKYLDVVFLKLDCNQENKPLAKELGIRVVPTFKILKDNQVVKEVKGAKFDDLVAAIDVVRSS	280.178	AT3G02730.1	3e-71	TRXF1, ATF1	thioredoxin F-type 1			thioredoxin F-type, chloroplastic
LOC18772113	PRUPE_6G233700	ATGACTGACAAGGCTGAATCTTCAGACTCTAAGGGAACGAAAAGGGACTTCAGCACGGCGATCCTTGAGCGCAAGAAGGCTGCGAATCGGCTTGTTGTGGATGATGCTATCAACGATGACAACTCGGTCGTCGCGCTCCATCCAGATACCATGGAGAAGCTCCAGCTCTTTCGTGGTGACACAATCTTGATCAAGGGAAAGAAAAGGAAAGATACAATCTGCATTGCCCTGGCTGATGATACATGTGAGGAACCAAAGATAAGGATGAACAAGGTTGTCAGGAGCAACCTAAGGGTTAGGCTGGGGGATGTTGTTTCTGTTCACCAATGTGCTGATGTCAAGTATGGAAAGCGTGTCCACATTCTTCCTGTGGATGACACTATTGAAGGGGTCACTGGA…	MTDKAESSDSKGTKRDFSTAILERKKAANRLVVDDAINDDNSVVALHPDTMEKLQLFRGDTILIKGKKRKDTICIALADDTCEEPKIRMNKVVRSNLRVRLGDVVSVHQCADVKYGKRVHILPVDDTIEGVTGNLFDAYLKPYFLEAYRPVRKGDLFLVRGGMRSVEFKVIETDPPEYCVVAPDTEIFCEGEPVKREDEERLNEVGYDDVGGVRKQMAQIRELVELPLRHPQLFKSIGVKPPKGILLYGPPGSGKTLIARAVANETGAFFFCINGPEIMSKLAGESESNLRKAFEEAEKNAPSIIFIDEIDSIAPKREKTHGEVERRIVSQLLTLMDGLKSRAHVIVMGATNRPNSIDPALRRFGRFDREIDIGVPDEVGRLEVVRIHTKNMKLAEDVD…	202.636	AT3G53230.1	0		ATPase, AAA-type, CDC48 protein			cell division control protein 48 homolog D
LOC18772122	PRUPE_6G021700	ATGGCTCGTACCAAGCAGACTGCTCGTAAGTCCACCGGAGGGAAGGCCCCTCGCAAGCAGCTGGCAACAAAGGCTGCTCGGAAGTCGGCTCCCGCTACCGGAGGAGTGAAGAAGCCTCATCGTTTCAGGCCAGGGACTGTGGCGCTGAGAGAGATCAGGAAGTACCAGAAGAGCACTGAGCTCTTGATCCGCAAGCTTCCGTTCCAGAGGCTTGTGAGAGAGATTGCTCAGGACTTCAAGACCGATCTCCGGTTCCAGAGCAGCGCCGTGGCGGCGCTGCAAGAGGCGGCGGAGGCCTATTTGGTAGGTCTCTTTGAGGACACCAATCTCTGCGCCATTCATGCCAAGAGGGTCACCATTATGCCCAAGGACATCCAGCTTGCTCGTAGAATTAGGGGG…	MARTKQTARKSTGGKAPRKQLATKAARKSAPATGGVKKPHRFRPGTVALREIRKYQKSTELLIRKLPFQRLVREIAQDFKTDLRFQSSAVAALQEAAEAYLVGLFEDTNLCAIHAKRVTIMPKDIQLARRIRGERA	217.704	AT5G65360.1	2e-94		Histone superfamily protein			histone H3.2
LOC18772222	PRUPE_6G363300	ATGGCGGCTGCTGCGAGGAGCGCGATACTTAAGTACCTCAGAGTTCCAGTTCCGGCCGTGCCATCAAACCCTAGCTCCACCACCCCTCTATTTCTATCCCCCTTTAACGCCATACGACGCCGTCTCTTCTCCGAGGAGGTGAGGGGCACCTTCCTCGACAAATCCGAGGTCACCGATCGTGTTATCTCTGTCGTCAAGAACTTCCAGAAAGTCGATCCCTCCAAGGTTACACCAAATGCTCATTTCCAGAATGATCTTGGATTAGATAGTTTAGATGCTGTGGAGATTGTGATGGCTCTTGAAGAGGAGTTTGGGTTTGAGATCCCTGATAATGAAGCTGACAAGATCAACTCAATCGGTCTTGCTGTGGACTTTATTTCTTCTCACCCTCAGGCGAAG…	MAAAARSAILKYLRVPVPAVPSNPSSTTPLFLSPFNAIRRRLFSEEVRGTFLDKSEVTDRVISVVKNFQKVDPSKVTPNAHFQNDLGLDSLDAVEIVMALEEEFGFEIPDNEADKINSIGLAVDFISSHPQAK	423.257	AT1G65290.1	9e-62	mtACP2	mitochondrial acyl carrier protein 2			acyl carrier protein 2, mitochondrial
LOC18772226	PRUPE_6G329100	ATGAGTAAGCTGGAGGTTATGGATCTTGAGAGATCGGTTTACAAAGTAAATATTTGCTGCTTGGGCTGTAAGGGGAAAGTTAGGAAAGCGTTGAAAATTGAAGGTGTGTACAACAGCATTATAGATGCAGATCAGGGGATGGTGACTGTGATTGGGAATATTGAGCCAATCATATTTATTAAGAAACTTAAAAAAGAAGGGAAAAATGCCCAGCTTCTGGGAGTTCAAAGGATTTCAAACAACAACCAAGCTCAGCTCAACAATCAGATGGCTGCTGGGAAAGGTGGAAAAGACAACAAATCTCAGAAGCCAAAGGGTGGCCAACAACAACAACAAGCACAGCAGCAGCATCAATTCAAAGGGGGTAAAGCCATGAAAATGCCTCCTCCTAAGGACCAG…	MSKLEVMDLERSVYKVNICCLGCKGKVRKALKIEGVYNSIIDADQGMVTVIGNIEPIIFIKKLKKEGKNAQLLGVQRISNNNQAQLNNQMAAGKGGKDNKSQKPKGGQQQQQAQQQHQFKGGKAMKMPPPKDQKSVKFNLPEDEFGGSDGEFDDEYDSEFDDEEFDEFGDEDYDDDDDEQEFGHGHGHHQQQQPNKMMPGMMGPQGPYGKMMPIMGNGHGPHGPAGMINMHAMNEKKSGGGGGGGSAKKGGVIEFPVQLKGKSENNEKKNGKDGKKGGGNGKGGEKKKGEKEKEECKSGGGLVGWLKRSTSIGRGGSKGSGVDGGDGKNNGKGNGGKKGGGKHDGARELKKGKNDYHEIDVVLNHGKGGKGGKEIKEGKEGKGSNGGKGGGKGGGNGGD…	365.041	AT3G06130.2	3e-19		Heavy metal transport/detoxification superfamily protein			heavy metal-associated isoprenylated plant protein 34
LOC18772238	PRUPE_6G269100	ATGGTGAAGGGCCGCCAAGGAGAGCGCATCAGACTCTATGTGCGAGGAACTGTTCTTGGATACAAGAGGTCCAAGTCGAATCAGTACCCCAGCGCGTCGCTGATTCAGATCGAGAATGTGAACACTAAGGAAGAGGTGGCCTGGTACGCTGGTAAGCGCTTGGCGTACATATACAAGGCCAAGGTGAAGAAGAACGGCAGCCATTACCGTTGCATTTGGGGCAAGGTCTCTAGGCCTCATGGTAACAGTGGCGTCGTTCGCGCCAAGTTCAAGTCCAATCTTCCCCCCAAGTCCATGGGAGCTAGAGTCAGGGTTTTCATGTATCCCAGCAACATTTGA	MVKGRQGERIRLYVRGTVLGYKRSKSNQYPSASLIQIENVNTKEEVAWYAGKRLAYIYKAKVKKNGSHYRCIWGKVSRPHGNSGVVRAKFKSNLPPKSMGARVRVFMYPSNI	1787.22	AT1G07070.1	2e-70		Ribosomal protein L35Ae family protein			60S ribosomal protein L35a-1
LOC18772249	PRUPE_6G081500	ATGTCAACCCCTCGAAGCTCTGCCTATCTCGATGCCGTCACTCTAGAAATCGAGAAGAAGCTCCAGCGGGCGCTAGCTTCTCCGACACAGCGGCGCAACTTGTTGCAGGAGTTGTTTGCTGACATAGCTTTAGAGATCGATGAGCGAGCCAAAGATATGATTCTCAGCAGGGAAGAAGATGCAATTTCTCCTGCAGAGGATAGCATGGATGGTCAGCTATGCTTTTATGATGTGCTTACTGACCATTATGTTCAGGTGCCCGCGAGTGGAAAATGCATCCTTGATTTGATTGTCCAACTATGGAGCCAGTCATTTGCATCTCATATTTTTGCCTTGTTATTCCACAAATGGCTGTTTGAAGTTCAACTTGACAACTCTGAAGTTCTTCTTCGTTACTCA…	MSTPRSSAYLDAVTLEIEKKLQRALASPTQRRNLLQELFADIALEIDERAKDMILSREEDAISPAEDSMDGQLCFYDVLTDHYVQVPASGKCILDLIVQLWSQSFASHIFALLFHKWLFEVQLDNSEVLLRYSSALIEGATNVFWIDTQSNTRRFQSLFRYLLEDVALEPKRLNKIPVQVQRDLFLLLSRFIFFYNSVDKLGSFLRQFPLFPNAFLVGGAEDFFVIELADQLQKLKVEPVLLHYLSHIKLLQGMDLRMATSTRLKACLYSFTSPGGPMYPTRAVRHAAWDALDLLFPVGRYPRHLISLFFRLLYPWYWPSSCWNFIMDCIKAVLYSLLGLIYSSLEKLRKPKF	279.174	AT5G59960.1	0		unknown protein; FUNCTIONS IN: molecular_function unknown; INVOLVED IN: biological_process unknown; LOCATED IN: nucleus; EXPRESSED IN: 24 plant structures; EXPRESSED DURING: 15 growth stages; Has 30201 Blast hits to 17322 proteins in 780 species: Archae - 12; Bacteria - 1396; Metazoa - 17338; Fungi - 3422; Plants - 5037; Viruses - 0; Other Eukaryotes - 2996 (source: NCBI BLink).			uncharacterized
LOC18772279	PRUPE_6G224000	ATGGGAGGAGGCAACGGTCAAAAGGCCAAGATGGCACGTGAGAAGAACTTGGAGAAGCAGAAAGCCGCCGGCAAGGGAAGCCAGCTTAAAACAAACGAGAAAGCCATGTCCATCCAGTGCAAGGTGTGTATGCAAGCATTTATGTGCACCACATCAGAGGTGAAGTGCAGGGAACATGCTGAAGCAAAGCATCCCAAGTCTGATGTGTACGCTTGTTTCCCTCATCTCAAGAAATGA	MGGGNGQKAKMAREKNLEKQKAAGKGSQLKTNEKAMSIQCKVCMQAFMCTTSEVKCREHAEAKHPKSDVYACFPHLKK	1207.35	AT2G23090.1	2e-43		Uncharacterised protein family SERF			uncharacterized protein At2g23090
LOC18772340	PRUPE_6G363900	ATGCCGAAGCAAATCCACGAGATTAAGGATTTCCTTCTAACTGCAAGGAGGAAGGATGCACGCTCTGTCAAAATCAAGAGGAGCAAAGATGCTGTCAAGTTTAAGGTTCGATGCTCCAAGTACCTTTACACTCTTTGCGTGTTTGATTCGGAGAAGGCCGACAAGTTGAAGCAATCCCTTCCTCCAGGTTTGAGCGTGCAGGACCTGTGA	MPKQIHEIKDFLLTARRKDARSVKIKRSKDAVKFKVRCSKYLYTLCVFDSEKADKLKQSLPPGLSVQDL	235.26	AT3G59540.1	6e-42		Ribosomal L38e protein family			60S ribosomal protein L38
LOC18772360	PRUPE_6G067100	ATGACAAGAGATAGAAACATAGGGGTGGCCGTCGATTTCTCAAAGGGAAGCAAGATTGCTCTGAAATGGGCTATCAATAATCTGGCTCATGAAAAGGGTGACACCTTGTATGCTATCCATGTCAAGCCCTCTCAGGGCGATGAGAGCCGCAACCTTCTTTGGTCCACCACCGGATCACCTCTGATTCCATTGGAGGAGTTCCGTCAAAAAGCGGTGATGGAGAACTATGAAGTCGAGGTCGATCCGGAGGTCTTGGACTTGCTTGACACTGCACACAGGCAGAAACATGTGACGGTGGTGGCAAAGCTTTACTGGGGTGATGCGAGAGAGAAACTTTGTGGGGCAGTCGAAGATCTAAAGCTTGACTGCTTGGTCCTTGGAAGCAGGGGACTTGGTACC…	MTRDRNIGVAVDFSKGSKIALKWAINNLAHEKGDTLYAIHVKPSQGDESRNLLWSTTGSPLIPLEEFRQKAVMENYEVEVDPEVLDLLDTAHRQKHVTVVAKLYWGDAREKLCGAVEDLKLDCLVLGSRGLGTIQRVLLGSVSSYVMANATCAVTIVKDHSA	788.68	AT3G53990.1	1e-70		Adenine nucleotide alpha hydrolases-like superfamily protein			universal stress protein PHOS34
LOC18772363	PRUPE_6G335000	ATGGTGAAGGGCGTTGCTGTTCTTGGCTCCAGTGAGGGTGTTAAAGGAACCATCAACTTCACCCAAGAGGGAGATGGCCCAACTACTGTGACTGGAAGTATTTCTGGCCTCAAGCCTGGGCTTCATGGTTTCCATGTCCATGAATTTGGAGACACAACCAACGGTTGCTTGTCAACTGGACCGCATTTCAATCCTGATGGCAAGCACCATGGTGCCCCTGAAGACGAGATTCGCCATGCCGGTGATCTTGGAAATATCACTGTTGGGGACGATGGAACTGCAAACTTCACAATTATTGACAAGCAGATTCCTCTCGCTGGACCACAATCAATCATTGGTAGGGCGGTTGTTGTCCATGCAGACCCTGATGACCTGGGCAAGGGTGGACATGAGCTTAGC…	MVKGVAVLGSSEGVKGTINFTQEGDGPTTVTGSISGLKPGLHGFHVHEFGDTTNGCLSTGPHFNPDGKHHGAPEDEIRHAGDLGNITVGDDGTANFTIIDKQIPLAGPQSIIGRAVVVHADPDDLGKGGHELSKSTGNAGGRTACGIIGLQN	3216.28	AT1G08830.2	1e-86	CSD1	copper/zinc superoxide dismutase 1			superoxide dismutase [Cu-Zn]
LOC18772371	PRUPE_6G188000	ATGTTGGGCGCAATCTCCATAGCTCCATCTTCAACGGTTACATTCCCGGCAAGGCTGCTCTCGCCAATCCCCAAGTCCTCGTTCAATGGCCTGCGATTCCAACGCGCTTGCCCGAACACTGTCGTTCGTCTCCCAACGGCGTCGTTTCGGAGGCCTTGCTCGTCGTCTTCGGTGGTGATGATGGCCAAGAGAGAAGAAGAGATGAAGGAAATCAGAACCAAAACCACCGAAGAAATCAACGAGGAGGTGGTTGAGCTCAAAGGTGAGCTCTTCATGCTTCGCCTCCAGAAATCGGCTCGCAACGAGTTCACATCCAGCGAGTTCCGTCGAATGCGCAAAAGGATTGCTCGCTTGCTCACTGTTAAACGAGAAAGAGAGATTGAGGAGGGAATCGGTAAG…	MLGAISIAPSSTVTFPARLLSPIPKSSFNGLRFQRACPNTVVRLPTASFRRPCSSSSVVMMAKREEEMKEIRTKTTEEINEEVVELKGELFMLRLQKSARNEFTSSEFRRMRKRIARLLTVKREREIEEGIGKRLSRKFDRQWKRSIVVRPPPSLIKLQEEEAAAEAAEKAA	356.239	AT5G65220.1	2e-52		Ribosomal L29 family protein			50S ribosomal protein L29, chloroplastic
LOC18772383	PRUPE_6G253400	ATGGCTCCTGCTGCGCCCAAGAGCGGGATCTTCGTTGGTCTGAACAAAGGCCATATCGTCACCAAGCGTGAATTGGCTCCTCGCCCATCTGACCGCAAAGGGAAAACAAGCAAGAGGGTGCATTTCGTGAGGAACCTGATCAGGGAAGTTGCTGGTTTTGCTCCATATGAGAAGAGGATCACTGAGCTTTTGAAGGTTGGTAAGGACAAGCGTGCTCTTAAGGTGGCCAAGAGGAAGTTGGGTACCCACAAGAGAGCTAAGAAGAAGAGAGAGGAGATGTCCAACGTCCTCCGCAAGATGAGGTCTGGTGGTGTTACTGAGAAGAAGAAGTGA	MAPAAPKSGIFVGLNKGHIVTKRELAPRPSDRKGKTSKRVHFVRNLIREVAGFAPYEKRITELLKVGKDKRALKVAKRKLGTHKRAKKKREEMSNVLRKMRSGGVTEKKK	582.17	AT3G53740.4	3e-56		Ribosomal protein L36e family protein			60S ribosomal protein L36-2
LOC18772421	PRUPE_6G345200	ATGGCGGATGTGGAGGCTGATGTGGCGGTGGCCGGAGTGCCTAAGAAGAGGACGTTTAAGAAGTTCAGCTTCAGAGGCGTCGATTTGGATGCTCTTCTTGATATGTCCACTGATGAGCTCGTTAAGCTCTTCCCTGCCAGGGCTCGCAGAAGGTTTCAGAGAGGTTTGAAAAGAAAGCCAATGGCATTGATCAAGAAGCTGCGCAAAGCTAAAAGGGAGGCACCACCAGGTGAGAAACCGGAGCCAGTTAGGACTCACCTACGAAACATGATCATTGTACCCGAAATGATCGGGAGCATCATTGGAGTTTACAATGGCAAGACCTTCAATCAGGTTGAGATCAAGCCAGAAATGATCAGCCATTATCTTGCTGAGTTCTCTATAAGTTACAAGCCTGTG…	MADVEADVAVAGVPKKRTFKKFSFRGVDLDALLDMSTDELVKLFPARARRRFQRGLKRKPMALIKKLRKAKREAPPGEKPEPVRTHLRNMIIVPEMIGSIIGVYNGKTFNQVEIKPEMISHYLAEFSISYKPVKHGRPGIGATHSSRFIPLK	292.377	AT5G09500.1	4e-91		Ribosomal protein S19 family protein			40S ribosomal protein S15-4
LOC18772449	PRUPE_6G081200	ATGAGGAAGTTCGATCCATGGCCGATTTTCTTCAAGCGAGAATGGAACAGGAACTGGCCGTTCCTGGTTGGGTTTGCCATCACCGGAACCCTCATCACCAAGTTCTCTCTTGGCCTCACTGAGGAAGACGCTAAGAACTCAGCTTTCGTTCAGAGGCACAAGAGGTGA	MRKFDPWPIFFKREWNRNWPFLVGFAITGTLITKFSLGLTEEDAKNSAFVQRHKR	714.82	AT5G59613.2	4e-27		unknown protein; FUNCTIONS IN: molecular_function unknown; INVOLVED IN: biological_process unknown; LOCATED IN: mitochondrial respiratory chain complex III; BEST Arabidopsis thaliana protein match is: unknown protein (TAIR:AT3G46430.1).			uncharacterized
LOC18772470	PRUPE_6G323700	ATGTTTGGTTCTGGTCCGGGTACTGCACATGAAAGCAGAGGACTTTCTGGACCGGTTCTATTTCCAACGCGGTTTGTTTGGCCTTATGGCGGAAGGAGGGTGTTTCTCAGTGGTTCTTTCACAAGGTGGTTAGAACTTATACCTATGTCTCCAGTGGAGGGCTGCCCAACTGTTTTTCAAGTTGTTTGGAACTTAACGCCAGGATATCACCAGTACAAATTTTGTGTTGACGGTGAATGGCGGCATAATGAGCAGCAGCCTTTTGTTACTGGGAATTGTGGAACTGTAAATACCATCTTTCTAGCTGGGGAACCAGATATGGTTCCTACTAGTTTCAGTCCTGAGACTTCTGGCAGATCCAACATGGATGTAGATACTGATGTATTTACACATGTGGAA…	MFGSGPGTAHESRGLSGPVLFPTRFVWPYGGRRVFLSGSFTRWLELIPMSPVEGCPTVFQVVWNLTPGYHQYKFCVDGEWRHNEQQPFVTGNCGTVNTIFLAGEPDMVPTSFSPETSGRSNMDVDTDVFTHVEAVPRFSQADLDISRHRISMFLSRHTAYELLPESGKVIALDVNLPVKQAFHILHEQGVPVAPLWDFGKGQFVGVLSALDFILILKELGNHGSNLTEEQLETHTIAAWKEAKLRLNRQLDGNGRCYPRRLVSAGPYDSLKEVALGILQNKVATIPIVDSSSQDGSLPQLLHLASLSGILKCICRHFRHSSSSLPILQHPISEFPIGTWVPNIAEPNGRPLAMLRPNSSLADALSLLVQAEVSSIPIVDENDSLLDIYSRSDITALARD…	1382.9	AT1G09020.1	0	SNF4, ATSNF4	homolog of yeast sucrose nonfermenting 4			sucrose nonfermenting 4-like protein
LOC18772493	PRUPE_6G035200	ATGGCAGCCTCTTCCTCCACCTTGTTCTCTGCCCCAGCCATCTCTTCCACCATCTCAAGGAGCCATACTCACCAACTCTCACCAACCCAAATCTCCTTCCAAGGCCTTAGACCCCTCACCAAGGCTGCCCCAAGCACCAAGCTGAGCTTCAGTGCACCAAACACCAAGAGATCAACTGGTGTTGTGAGAGCAGAGCTGAACCCATCTTTGGTCATAAGCCTGAGCACAGGGCTGTCACTTTTCTTGGGGAGGTTTGTGTTCTTCAACTTCCAGAGAGAGAATGTGGCCAAGCAAGGCTTGCCTGAGCAGAATGGAGTAACCCATTTTGAGGCAGGAGACACCAGAGCCAAGGAGTATGTGAGCCTCCTCAAATCTAATGACCCTGTTGGCTTCAACATT…	MAASSSTLFSAPAISSTISRSHTHQLSPTQISFQGLRPLTKAAPSTKLSFSAPNTKRSTGVVRAELNPSLVISLSTGLSLFLGRFVFFNFQRENVAKQGLPEQNGVTHFEAGDTRAKEYVSLLKSNDPVGFNIVDVLAWGSIGHIVAYYILATSSNGYDPKFFE	1164.39	AT1G55670.1	1e-77	PSAG	photosystem I subunit G			photosystem I reaction center subunit V, chloroplastic
LOC18772495	PRUPE_6G095700	ATGGGTAAAGAGAAGTTCCACATCAACATTGTGGTCATTGGCCATGTCGACTCTGGTAAGTCGACTACCACTGGTCACTTGATCTACAAGCTTGGTGGTATCGACAAGCGTGTTATCGAGAGGTTTGAGAAGGAAGCTGCTGAGATGAACAAGAGGTCATTCAAGTATGCCTGGGTGCTGGACAAGCTCAAGGCTGAGCGTGAACGTGGTATTACAATTGATATTGCCTTGTGGAAGTTTGAGACCACCAAGTACTACTGCACTGTTATTGATGCTCCTGGACATCGTGACTTTATCAAGAACATGATTACTGGCACCTCCCAGGCTGACTGTGCCATCCTCATTATTGACTCCACCACTGGTGGTTTTGAAGCCGGCATTTCCAAGGATGGTCAGACC…	MGKEKFHINIVVIGHVDSGKSTTTGHLIYKLGGIDKRVIERFEKEAAEMNKRSFKYAWVLDKLKAERERGITIDIALWKFETTKYYCTVIDAPGHRDFIKNMITGTSQADCAILIIDSTTGGFEAGISKDGQTREHALLAFTLGVRQMICCCNKMDATTPKYSKARYDEIVKEVSSYLKKVGYNPEKIPFVPISGFEGDNMIERSTNLDWYKGPTLLEALDLISEPKRPSDKPLRLPLQDVYKIGGIGTVPVGRVETGTLKPGMLVTFAPTGLTTEVKSVEMHHESLQEALPGDNVGFNVKNVAVKDLKRGYVASNSKDDPAKEAANFTAQVIIMNHPGQIGQGYAPVLDCHTSHIAVKFAEMLTKIDRRSGKELEKEPKFLKNGDAGFVKMIPTKPMV…	1291.63	AT5G60390.3	0		GTP binding Elongation factor Tu family protein			elongation factor 1-alpha
LOC18772503	PRUPE_6G196400	ATGGCTTCCGCAGTGCCCGAAACCCTAAGCCGAGAACAGTATGTGTACCTGGCCAAGCTCGCCGAGCAAGCCGAGCGCTACGAGGAGATGGTGAGCTTCATGGAGAAGCTGGTGGTGGGGTCCACCGCCGCCGGGACTGAACTGACGGTCGAGGAGCGCAACCTGCTCAGTGTCGCCTACAAGAACGTCATCGGCTCGCTCCGGGCGGCTTGGCGCATAGTGTCATCGATCGAGCAGAAGGAGGAGGGACGCCGGAACGAGGAACACGTGGCGCTCGTCAAGCAGTACAGATCCAAGGTCGAGACTGAGCTCTCGGCCATCTGCGCCGGAATTCTCGAGCTCCTGGAGAAGCACCTTGTTCCATCGGCTTCTACTGGAGAGTCCAAGGTCTTCTACTTG…	MASAVPETLSREQYVYLAKLAEQAERYEEMVSFMEKLVVGSTAAGTELTVEERNLLSVAYKNVIGSLRAAWRIVSSIEQKEEGRRNEEHVALVKQYRSKVETELSAICAGILELLEKHLVPSASTGESKVFYLKMKGDYHRYLAEFKNGDERKTAAEDTMVAYKAAQDIALADLAPTHPIRLGLALNFSVFYYEILNSSEKACSMAKQAFEEAIAELDTLGEESYKDSTLIMQLLRDNLTLWTSDLQEQMDEA	635.269	AT5G65430.1	5e-164	GRF8, 14-3-3KAPPA, GF14 KAPPA	general regulatory factor 8			14-3-3-like protein GF14 kappa
LOC18772512	PRUPE_6G283900	ATGGATCAGATTTTGAACAAGGCGGGTTCCTACTGGTTCAGCCAGAAGGCCAACAAGGAGCTCACCTCCGTCGGGGATGATATAAACTCATTGCAAACTAGCATCGAAGGAGGAACCAAATGGTTGGTTAATAAACTCAAAGGAAAAATGCAAAAGCCATTGCCTGAGCTTCTAAAGGATTTTGACATGGCAGTAGGAATATTTCCTCGTGATGCTACCAACTATGAATTTAATGAGGAGACGGGAAAACTTACAGTCTACATACCGGCAGCCTGTGAAGTGGGCTACAGAGATTCATCTGTTTTACGTTTCTTCACCATTGTAACTGGATATTTGAAGAAAGGAAGGCTAGAAGACATCCAGGGGATGAAGACAAAGGTGATTATATGGGTAAATGTG…	MDQILNKAGSYWFSQKANKELTSVGDDINSLQTSIEGGTKWLVNKLKGKMQKPLPELLKDFDMAVGIFPRDATNYEFNEETGKLTVYIPAACEVGYRDSSVLRFFTIVTGYLKKGRLEDIQGMKTKVIIWVNVSCITSEGSKLHFTAGLKRTRNREAYEVLRDGITVEKF	286.731	AT5G37070.1	1e-95		Protein of unknown function, DUF538			uncharacterized protein At5g01610
LOC18772532	PRUPE_6G192100	ATGAAGTTTAACATTGCGAATCCCACCACTGGGTGCCAGAAGAAGCTCGAGATCGACGATGACGCTAAGCTTCGTGCATTCTGGGACAAGAGGATCTCTCAAGAAGTCAATGGTGATGCCCTAGGCGAGGAGTTCAAGGGCTATGTATTTAAAATTATGGGAGGCTGTGACAAGCAAGGCTTTCCTATGAAGCAAGGAGTGTTAACCCCAGGCCGTGTTCGCCTTTTGCTCCATAGAGGTACCCCGTGCTTCCGTGGATATGGAAGGAGGAATGGAGAACGAAGAAGGAAGTCTGTTCGTGGATGTATTGTCAGTCCAGACCTCTCTGTATTGAACTTGGTTATTGTTAAGAAAGGTGACAATGACCTTCCTGGACTGACAGATGTTGAAAAGCCAAGA…	MKFNIANPTTGCQKKLEIDDDAKLRAFWDKRISQEVNGDALGEEFKGYVFKIMGGCDKQGFPMKQGVLTPGRVRLLLHRGTPCFRGYGRRNGERRRKSVRGCIVSPDLSVLNLVIVKKGDNDLPGLTDVEKPRMRGPKRASKIRKLFNLTKDDDVRKYVNTYRRTFTSKTGKKCSKAPKIQRLVTPLTLQRKRARIAEKKKRVAKAKSEAAEYQKLLASRLKEQRDRRSESLAKRRSRLSGASKPSAA	229.089	AT5G10360.1	2e-161	EMB3010, RPS6B	Ribosomal protein S6e			40S ribosomal protein S6
LOC18772546	PRUPE_6G313800	ATGGGTTTGCTAAGTGAAGGCCTAACTCAGCTTCTGATCCCTTTGGCTGCTCTTGTTGGACTTGCTTTTGCTTTGCTTCAGTGGTTTTTGGTCTCAAGGGTGAAGGTCTCTGGTAGCTATGGTGAGGGGAATGGCTATAAGGACAAGTTGATTGGAGAAGCAGAAGAGGGTGTTGACAGCCTTGAGGTTACCATCAAGGTTGCTGAAATTCAAAATGCCATTTCTATTGGGGCGACCTCTTTTCTGTTTACCCAATACAGATACCTTAGCATCTTCGTGGGTGTATTTAGTGCCATAATCTTCCTCTTCCTTGGTTCAGTGAAGGGTTTTAGTACCAAAAGTGAACCTTGCACATATAACACGGGCAATACATGTAAACCAGCATTAGCCAATGCCTTG…	MGLLSEGLTQLLIPLAALVGLAFALLQWFLVSRVKVSGSYGEGNGYKDKLIGEAEEGVDSLEVTIKVAEIQNAISIGATSFLFTQYRYLSIFVGVFSAIIFLFLGSVKGFSTKSEPCTYNTGNTCKPALANALFTTIAFLLGALTSVLSGFFGMKIATYANARTTLEARRGVGKAFITAFRSGAVMGFLLAANGLLVLYITINLFKLYYGDDWEGLYESITGYGLGGSSMALFGRVGGGIYTKAADVGADLVGKVERNIPEDDPRNPAVIADNVGDNVGDIAGMGSDLFGSYAESSCAALFVASISSFGISHDYTAMSYPLIISSMGIVVCLITTLFATDLFEIKKVNEIEPSLKRQLLISTVLMTAGIAAVTFVALPSEFTLFSFGTNKAVKNWYLFF…	499.366	AT1G15690.1	0	AVP1, ATAVP3, AVP-3, AtVHP1;1	Inorganic H pyrophosphatase family protein			pyrophosphate-energized vacuolar membrane proton pump 1
LOC18772588	PRUPE_6G147100	ATGACCATGATTGTTCACTTGAAGCTCAACTTCATTGTGCTTTGCTTCTCCACCTTGTTCCTGCTTCTACCATTCACTCAGTCTACGGATGTCAAATATTGTAGTCAGACAGATGAATATGCTGTGAAGGTCCAGGGAGTCGAGATATTGCCTGACCCAGTGGTGAGAGGCAAGCCAGCTACCTTTAACATCTCGGCCTCAACAGGTCAAGCCATCTCCAGTGGGAAAGTGGTGATTGAGGTTTACTATTTTGGGGTGCGCGTACATACAGAAACTCATGATCTTTGTGAAAAGCTTTCCTGCCCGGTTTCAGCAGGAAACTTTGTGCTCTCTCACACCCAAACTTTACCTGGGATCACTCCCCCTGGCTCTTACAATCTCAAGATGACAATCAAGGAT…	MTMIVHLKLNFIVLCFSTLFLLLPFTQSTDVKYCSQTDEYAVKVQGVEILPDPVVRGKPATFNISASTGQAISSGKVVIEVYYFGVRVHTETHDLCEKLSCPVSAGNFVLSHTQTLPGITPPGSYNLKMTIKDDHNQKLSCISFNFKIVFGSLVSAS	257.217	AT3G11780.1	5e-55		MD-2-related lipid recognition domain-containing protein / ML domain-containing protein			putative phosphatidylglycerol/phosphatidylinositol transfer protein DDB_G0282179
LOC18772621	PRUPE_6G268300	ATGCGTGAAATCCTTCACATCCAGGGAGGCCAGTGCGGCAACCAGATCGGTGCCAAGTTCTGGGAGGTGGTCTGCGCCGAGCACGGCATCGACGGCACCGGAAGGTATGAGGGAGACTCAGAGCTTCAGCTCGAGAGGATAAATGTCTATTATAATGAGGCCAGTTGTGGGAGGTATGTGCCCAGGGCTGTTCTCATGGACCTTGAGCCAGGGACCATGGACAGCGTCAGATCTGGACCTTACGGTCAGATCTTCAGGCCTGACAATTTCGTTTTTGGCCAGTCTGGTGCCGGGAACAACTGGGCTAAGGGCCACTACACCGAGGGGGCTGAATTGATAGATTCTGTGCTCGATGTGGTTCGCAAGGAAGCCGAGAATTGTGATTGCCTACAAGGGTTT…	MREILHIQGGQCGNQIGAKFWEVVCAEHGIDGTGRYEGDSELQLERINVYYNEASCGRYVPRAVLMDLEPGTMDSVRSGPYGQIFRPDNFVFGQSGAGNNWAKGHYTEGAELIDSVLDVVRKEAENCDCLQGFQVCHSLGGGTGSGMGTLLISKIREEYPDRMMLTFSVFPSPKVSDTVVEPYNATLSVHQLVENADECMVLDNEALYDICFRTLKLSTPSFGDLNHLISATMSGVTCCLRFPGQLNSDLRKLAVNLIPFPRLHFFMVGFAPLTSRGSQQYRALTVPELTQQMWDAKNMMCAADPRHGRYLTASAMFRGKMSTKEVDEQMINVQNKNSSYFVEWIPHNVKSTVCDIPPTGLKMASTFIGNSTSIQEMFRRVSEQFTAMFRRKAFLHWYT…	267.74	AT5G23860.2	0	TUB8	tubulin beta 8			tubulin beta chain
LOC18772625	PRUPE_6G319600	ATGGGCTTACTTGACCAGCTCTGGGACGACACCGTCGCCGGGCCCCGGCCCGATATCGGTCTTGGCAAGCTCCGCAAGCACAAAACCTTCAGTTTCCGATCCAGCTCCGCCAAGGGATCGTCGGATGGAGGGAGCGTGGGATCGTACGGTGAGGATTCGACAGAGGAGGCGACGAGAGTTACACGGAGTATTATGATAGTGAAACCCCCAGGATATGGGAGCGGTAACAGCGGATCGCCTCCGATTTCGCCAGCTGGGTCTACGCCTCCAGTGTCTCCGTTTTCTGGCAGCAGCATGGGAAGATTCAGGAGGAGGTCGGCATCGGATGCATACGAGAAGGCAAGCCAGGTTGGTGGTGGAGGAGCAAGGAGCAGCCCCCGGTCTCCTTTCGACGTGTGA	MGLLDQLWDDTVAGPRPDIGLGKLRKHKTFSFRSSSAKGSSDGGSVGSYGEDSTEEATRVTRSIMIVKPPGYGSGNSGSPPISPAGSTPPVSPFSGSSMGRFRRRSASDAYEKASQVGGGGARSSPRSPFDV	1288.76	AT1G56220.1	4e-40		Dormancy/auxin associated family protein			dormancy-associated protein homolog 3
LOC18772642	PRUPE_6G101700	ATGCCGCCGAAGTTCGATCCCTCACAGGTCGTCGACGTCTACGTCCGAGTCACCGGCGGTGAAGTCGGCGCGGCGAGTTCGCTTGCTCCAAAGATCGGTCCTCTCGGTCTCTCCCCAAAGAAGATCGGAGAAGACATAGCCAAGGAGACCGCCAAGGACTGGAAGGGCTTACGTGTCACCGTCAAGCTCACCGTCCAGAACAGGCAGGCCAAGGTCTCTGTGGTGCCGTCGGCCGCGGCGCTGGTCATCAAGGCTTTGAAGGAGCCCGAGCGCGACCGCAAGAAGACTAAGAACATCAAGCACAGTGGAAACATCTCTCTAGACGACGTCATCGAGATCGCCAAGATCATGAAGCACAGATCCATGGCCAAGGAGCTTGCCGGCACGGTGAAGGAGATT…	MPPKFDPSQVVDVYVRVTGGEVGAASSLAPKIGPLGLSPKKIGEDIAKETAKDWKGLRVTVKLTVQNRQAKVSVVPSAAALVIKALKEPERDRKKTKNIKHSGNISLDDVIEIAKIMKHRSMAKELAGTVKEILGTCVSVGCTVDGKDPKDLQQEIADGDVEIPLD	598.769	AT2G37190.1	1e-103		Ribosomal protein L11 family protein			60S ribosomal protein L12
LOC18772644	PRUPE_6G297800	ATGTCGCTGGTTTGGATGGAAGCTATTCTCCCTCTTGGGATCATAGCAGGAATGCTTTGCGTCATGGGAAATGCTCAGTATTATATCCACAAAGCCGCTCATGGCCGGCCGAAGCACATCGGAAATGACATGTGGGACGTAGCCATGGAGAGAAGGGACAAGAAGCTGATAGAGCAGGCGACTGCTCCTTCTTCTAATTAG	MSLVWMEAILPLGIIAGMLCVMGNAQYYIHKAAHGRPKHIGNDMWDVAMERRDKKLIEQATAPSSN	883.97	AT3G08610.1	3e-36		unknown protein; Has 40 Blast hits to 40 proteins in 15 species: Archae - 0; Bacteria - 0; Metazoa - 0; Fungi - 0; Plants - 40; Viruses - 0; Other Eukaryotes - 0 (source: NCBI BLink).			NADH dehydrogenase [ubiquinone] 1 alpha subcomplex subunit 1
LOC18772650	PRUPE_6G342800	ATGGGGAGTACCGGTGGACATGACTACGGTGCATACACCTATGAGAACCTCGAGAGGGAACCTTATTGGCCTTCAGAAAAGCTTCGAATTTCCATTACTGGGGCAGGTGGCTTTATTGCCTCACACATTGCTCGGAGATTGAAGAATGAGGGCCATTACATTATTGCTTCTGATTGGAAGAAGAACGAGCACATGACTGAAGACATGTTCTGTCATGAATTCCATCTCGTTGACCTTAGGGTTATGGATAATTGCTTGAAGGTTACCAAGAATGTTGACCATGTGTTCAACCTCGCTGCCGATATGGGTGGGATGGGCTTCATCCAGTCCAACCATTCTGTCATTTTTTACAATAATACTATGATTAGCTTCAACATGGTGGAAGCTGCTAGAATCAAT…	MGSTGGHDYGAYTYENLEREPYWPSEKLRISITGAGGFIASHIARRLKNEGHYIIASDWKKNEHMTEDMFCHEFHLVDLRVMDNCLKVTKNVDHVFNLAADMGGMGFIQSNHSVIFYNNTMISFNMVEAARINGVKRFFYASSACIYPEFKQLETNVSLKESDAWPAEPQDAYGLEKLATEELCKHYTKDFGIECRIGRFHNIYGPFGTWKGGREKAPAAFCRKTLTSTDKFEMWGDGLQTRSFTFIDECVEGVLRLTKSDFREPVNIGSDEMVSMNEMAEIVLSFEDKKLPIQHIPGPEGVRGRNSDNTLIKEKLGWAPTMRLKDGLRITYFWIKEQIEKEKAQGTDLSNYGSSKVVGTQAPVQLGSLRAADGKE	727.593	AT5G28840.2	0	GME	GDP-D-mannose 3',5'-epimerase			GDP-mannose 3,5-epimerase 2
LOC18772654	PRUPE_6G092700	ATGGGGAAGACACGTGGTATGGGAGCAGCTCGCAAGCTGAAGGACCACCGCAGAAGGCAAAGGTGGGCTGACAAGTCTTACAAGAAATCTCATCTTGGAAATGAGTGGAAGAAACCATTTGCTGGATCTTCCCACGCAAAAGGCATTGTTCTTGAGAAAATTGGTATTGAAGCCAAGCAGCCTAACTCTGCCATTAGAAAGTGTGCTCGAGTTCAGCTTATTAAAAATGGAAAGAAGATTGCTGCCTTTGTGCCAAATGATGGTTGCTTGAACTACATTGAAGAGAATGATGAGGTTCTGATTGCTGGATTTGGTCGTAAGGGACATGCTGTTGGTGATATTCCCGGAGTTAGGTTCAAGGTTGTGAAGGTCTCAGGCGTGTCACTTTTGGCCCTCTTC…	MGKTRGMGAARKLKDHRRRQRWADKSYKKSHLGNEWKKPFAGSSHAKGIVLEKIGIEAKQPNSAIRKCARVQLIKNGKKIAAFVPNDGCLNYIEENDEVLIAGFGRKGHAVGDIPGVRFKVVKVSGVSLLALFKEKKEKPRS	1470.21	AT5G02960.1	7e-94		Ribosomal protein S12/S23 family protein			40S ribosomal protein S23
LOC18772660	PRUPE_6G032200	ATGTTTGCAACCCTCTCCCTCTCTGCCTCAAACCCTCTCTCTTTCACCTCTCTTCCCAAAATGCCCCTGCCTCGCCAGCGCCACCAGCTCAGGGTCTCCGCGGCTGGGGCTTTCACCGAGACCAGGCCGCGGTCCAAAGCCTCAACGAGTCTCTACGAGGTCCTCCGAGTCAACGACAACGCTTCTCAGACGGAGATCAAGTCGGCGTACCGGAGCTTGGCCAAGCTCTACCATCCCGACGCCTCGCCATCGGAATCGGACGGCCGAGATTTCATCGAGATTCACAACGCCTACGCCACGCTGTCCGATCCGGCGGCCAGGGCCATGTACGACCTGTCGTTGAGTGCTCATCTTCAGCATCGTGTTCGTCGGAGAAGCTCGGTCGGGTTTCGACCAGAT…	MFATLSLSASNPLSFTSLPKMPLPRQRHQLRVSAAGAFTETRPRSKASTSLYEVLRVNDNASQTEIKSAYRSLAKLYHPDASPSESDGRDFIEIHNAYATLSDPAARAMYDLSLSAHLQHRVRRRSSVGFRPDGFYPTRRWETDQCW	271.233	AT3G13310.1	2e-34		Chaperone DnaJ-domain superfamily protein			chaperone protein dnaJ 11, chloroplastic
LOC18772661	PRUPE_6G077300	ATGCCTGCCACAGCAGGAAGGGTTCGCATGCCCGCGAACAATCGGGTGCATAGTAGTGCTGCCCTTCAAACCCATGGTATATGGCAGAGTGCAATTGGGTATGACCCCTATGCACCCAACAAAGAGGACAACAAGACTTCTGCGCAACCCAATTTGTCGAACTCTGAACCAGACGCTGAGAATGCGTATGCGAGCTTCCAGGGCCTCCTTGCACTTGCCCGTATAACTGGGTCCAATGCTGATGAGGCTCGTGGGGCTTGCAAGAGGTGTGGCCGTGTTGGGCACCTCAACTTTCAATGCAGGAACTTTCTGAGTGTTAAGGAAGACAAGGATAAAGACCCAGACGCGATTCAGGCTGATGTTGCGTCTGAATTGGGTAAGTTGAAGAGGAAGCTGGGA…	MPATAGRVRMPANNRVHSSAALQTHGIWQSAIGYDPYAPNKEDNKTSAQPNLSNSEPDAENAYASFQGLLALARITGSNADEARGACKRCGRVGHLNFQCRNFLSVKEDKDKDPDAIQADVASELGKLKRKLGRTNGKNVAESEESEDEDEDSESSDSDYDSEIEKIIAQRNGKRAVRKDSKKKNKDSDGDVSDTDSGERKKRGRSKKRSSKRKYNDDSDDSDECRKKRRKEKRRKRDESSEEDGERRRRHRKSRKEKRRRRSHRYSDDSESDSSEDSHSRKHRSRRSRKAVTPSDSDDDSRVGRGRKRSEKKSRKRHHEDDE	575.186	AT2G28910.1	2e-68	CXIP4	CAX interacting protein 4			CAX-interacting protein 4
LOC18772669	PRUPE_6G037200	ATGCAAGGAGCATTTAAAGCTTTTTCATCACATGGAAACATTGTGAAGAATGGAGTTTTGCGACACATCCGTCTTGTGAATCCCCTAATTCAGCCTGTTGCATTTTCACGCTTTGAGTCTGCTACGCCTGCTCGCATAGAAGAGCATGGTTTTGAAAGCACCAGAATTGCAGACATCTTGAAGGGGAAAGGTAAAGGTGCTGACGGTTCCTGGCTCTGGTGCACGACAGATGACTCTGTTTATGATGCTGTTAAGTCGATGACCCAGCACAACGTTGGGGCCTTGGTGGTTGTGAAACCTGGAGAGCAAAAATCTATCGCAGGAATCATAACAGAGAGAGATTATCTCAGGAAGATCATAGTGCAGGGAAGATCATCCAAGTCAACAAAGGTCGGGGAT…	MQGAFKAFSSHGNIVKNGVLRHIRLVNPLIQPVAFSRFESATPARIEEHGFESTRIADILKGKGKGADGSWLWCTTDDSVYDAVKSMTQHNVGALVVVKPGEQKSIAGIITERDYLRKIIVQGRSSKSTKVGDIMTEENKLITVTPDTKVLRAMQLMTDNRIRHIPVIDDRGMIGMVSIGDVVRAVVSEHREELDRLNAYIQGGY	715.156	AT5G10860.1	3e-124		Cystathionine beta-synthase (CBS) family protein			CBS domain-containing protein CBSX3, mitochondrial
LOC18772674	PRUPE_6G093700	ATGCAGAACGAAGAGGGAGTTATCACTGAGCTTTACATTCCCAGGAAATGCTCGGCCACCAACAGGTTGATAACTTCAAAGGACCACGCGTCCGTTCAGATCAACGTCGGGCATCTGGATGAGAATGGCATCTACACAGGCCAGTTCTCCACTTTTGCTCTCTGTGGTTACGTCCGCGCTCAGGGAGATGCCGACAGTGGTCTGGACCGACTCTGGCAGAAGAAGAAAGATGAAGTTAAACAACACTAG	MQNEEGVITELYIPRKCSATNRLITSKDHASVQINVGHLDENGIYTGQFSTFALCGYVRAQGDADSGLDRLWQKKKDEVKQH	240.234	AT5G27700.1	3e-50		Ribosomal protein S21e			40S ribosomal protein S21-2
LOC18772694	PRUPE_6G277300	ATGGGCGATTTCAACCTCGCGCTCGTCATCGTCGCCATTATCCTCTGCGTCATCGTCTTCGTCTTCAATGTCTACCTGCTCGTCAATTACCAGCACCCCGACGACAAGAACCAGGCCTACTTCCCCAAATTCGTCGTCGTTTTGGGGCTCTCCGTCGCCGCGATTTCCATACTGATGTTGCCGGCCGACGTGGCGAACCGTCAGGCCTGTCGCCACGCGATATACAATGGAGCGTGTAATCTCACTCTGCCAATGAAGGATATGTGGCTCGCGATCTATATCCTTGACGCCGTGCTTGTGTTCTTCATCATCCCCTTCGCTATGTTCTACTACGAAGGAGACCAGGACAAGAGTGTTGGAAAACGGATTAGAAGCGCGTTGTTGTGGGTGGTGGTGACG…	MGDFNLALVIVAIILCVIVFVFNVYLLVNYQHPDDKNQAYFPKFVVVLGLSVAAISILMLPADVANRQACRHAIYNGACNLTLPMKDMWLAIYILDAVLVFFIIPFAMFYYEGDQDKSVGKRIRSALLWVVVTAIVCALVLGILYGLVGKVDFTVRHLSSSTTSFPSSWSFSSSQECISGSHQCSAYSASDSSEKTWTMRTTFPEYVVALATIVGSVLFTIFGGVGIACLPLGLIFSFVRRPKAVITRSQYIKEATELGKKAKELKKAADALHQEERSGSKGRKWRKNVKAVEKELLQLEEDVKLLEEVYPQGEKAETTWAMTVLGYLAKLVLGILGLIVSVAWIAHIVIYLLISPPLSPFLNEVFIKLDDIWGLLGTVAFAFFCFYLLLAVIAGAMML…	238.178	AT5G01460.1	0		LMBR1-like membrane protein			LIMR family protein At5g01460
LOC18772715	PRUPE_6G257300	ATGGACACAAGTTTCTTGATCGAAATGGAATTCGACGACCGATACAGGCAAGCTCAGAGGACCAAATACGATTGCCTTCTGTTTGATCTAGATGACACACTATATCCCTACAGTACTGGGATTGCTACAGCATGCAGAAACAATATAGAAGATTATATGGTTGAAAAGCTTGGCATTGAGAGGAGCATAATCCCTGAATTGGGTAACCTGCTGTACAAGAATTATGGAACTACAATGGCTGGTCTCAGGGCTATTGGCTATGACTTTGACTATGATGAATATCACAGTTTTGTCCATGGAAGATTACCTTATGAGAACATAAAACCTGACCCGGTTTTGAGGAACCTTCTGCTGAACCTGCCTTATCGGAAAATCATATTCACAAATGCAGACAAGGTC…	MDTSFLIEMEFDDRYRQAQRTKYDCLLFDLDDTLYPYSTGIATACRNNIEDYMVEKLGIERSIIPELGNLLYKNYGTTMAGLRAIGYDFDYDEYHSFVHGRLPYENIKPDPVLRNLLLNLPYRKIIFTNADKVHAAKALSRLGLEDCFEGIICFETLNPTHKSIVSDDEDDIEFVGPAAEVPATTTSSSQIFDIIGHFAQQNPTSKLPKTPIVCKPSEAAIERALKIANIDPQRTLFFEDSVRNIQAGKRVGLQTVLIGTSQRVKGADYALESIHNLREALPELWEVEMISEVRYSGKVAVETSVTA	437.034	AT5G02230.2	3e-143		Haloacid dehalogenase-like hydrolase (HAD) superfamily protein			uncharacterized
LOC18772723	PRUPE_6G321200	ATGGCTAGGCTATGCTGTGTCTCATTCCTCCTCCTGATCTGCGCCTCAATCTTGTTGATGGGTTCATCATCTTCTGTTATAGCAAGTGGGGACCACCACCCGAACCTTTCATGGATGCCCACCAACAACTCAGCCTGCAAGGGCTCCATAGCAGAGTGCTTGGCTGCAGGGGATGAGGAGTTTGACTTGGACTCTGAGATCAACCGGCGCATCTTAGCCACCAGCAAGTACATCAGCTACGGTGCGATGCAGAGGAACACTGTGCCTTGCTCAAGGCGTGGCGCCTCCTACTACAATTGCCAGCCGGGAGCTCAGTCCAACCCCTACAGCCGCGGCTGCAGCGCCATCACAAGGTGCAGGAGTTAA	MARLCCVSFLLLICASILLMGSSSSVIASGDHHPNLSWMPTNNSACKGSIAECLAAGDEEFDLDSEINRRILATSKYISYGAMQRNTVPCSRRGASYYNCQPGAQSNPYSRGCSAITRCRS	264.345	AT4G15800.1	5e-41	RALFL33	ralf-like 33			rapid alkalinization factor
LOC18772748	PRUPE_6G351200	ATGTCGAAACGAGGTCGTGGAGGGTCTGCCGGAAACAAGTTCCGGATGTCGCTGGGTCTGCCGGTGGCTGCCACAGTGAACTGCGCAGACAACACCGGTGCTAAGAACCTTTACATAATTTCTGTAAAGGGAATCAAGGGTCGCCTTAACCGCCTCCCTTCTGCTTGTGTTGGTGACATGGTGATGGCAACTGTCAAGAAAGGCAAGCCTGATCTCCGTAAGAAGGTCTTGCCCGCTGTTATTGTGCGCCAGCGCAAGCCATGGCGCCGAAAGGACGGTGTTTTCATGTACTTCGAAGATAATGCTGGTGTCATCGTAAATCCAAAGGGCGAAATGAAAGGGTCTGCGATCACTGGACCTATTGGAAAGGAATGTGCTGATCTGTGGCCAAGGATTGCA…	MSKRGRGGSAGNKFRMSLGLPVAATVNCADNTGAKNLYIISVKGIKGRLNRLPSACVGDMVMATVKKGKPDLRKKVLPAVIVRQRKPWRRKDGVFMYFEDNAGVIVNPKGEMKGSAITGPIGKECADLWPRIASAANAIV	405.844	AT3G04400.1	6e-97	emb2171	Ribosomal protein L14p/L23e family protein			60S ribosomal protein L23
LOC18772756	PRUPE_6G252500	ATGGCCGGCAAAGGAGAGGGACCAGCCATCGGTATCGATCTCGGCACCACCTACTCCTGCGTTGGTGTATGGCAACACGACCGTGTTGAGATCATCGCCAATGACCAGGGTAACAGAACGACGCCGTCTTATGTCGCATTCACAGACACCGAGCGTTTAATCGGTGATGCTGCTAAGAACCAGGTCGCCATGAACCCCATTAACACCGTATTCGATGCTAAGAGGTTGATTGGTCGTAGATTTTCTGATGCGTCTGTCCAGAGTGACATGAAATTGTGGCCATTCAAGGTCACCCCCGGACCTGGTGACAAGCCCATGATCGGTGTCTCTTACAAGGGAGAAGACAAGGTCTTCGCCGCTGAGGAGATCTCCTCCATGGTCCTTATCAAGATGCGTGAG…	MAGKGEGPAIGIDLGTTYSCVGVWQHDRVEIIANDQGNRTTPSYVAFTDTERLIGDAAKNQVAMNPINTVFDAKRLIGRRFSDASVQSDMKLWPFKVTPGPGDKPMIGVSYKGEDKVFAAEEISSMVLIKMREIAEAYLGSTIKNAVVTVPAYFNDSQRQATKDAGVIAGINVLRIINEPTAAAIAYGLDKKATSVGEKNVLIFDLGGGTFDVSLLTIEEGIFEVKATAGDTHLGGEDFDNRMVNHFVQEFKRKNKKDISGNPRALRRLRTSCERAKRTLSSTAQTTIEIDSLYEGIDFYSTITRARFEELNMDLFRKCMEPVEKCLRDAKMDKSTVHDVVLVGGSTRIPKVQQLLQDFFNGKELCKSINPDEAVAYGAAVQAAILSGEGNEKVQDLLL…	661.961	AT5G02500.1	0	HSC70-1, HSP70-1, AT-HSC70-1, HSC70	heat shock cognate protein 70-1			probable mediator of RNA polymerase II transcription subunit 37e
LOC18772792	PRUPE_6G329800	ATGTCAGAAGAGCTGGAGTATCGATGCTTTATTGGTGGCCTCGCATGGTCAACATCTGATAGAAGTCTAAAAGATGCATTTGACAAGTTTGGAAAGCTTGTTGAAGCCAAGGTAGTTGTTGATAAGTTTTCTGGACGCTCCCGTGGATTTGGGTTTGTCACTTTTGATGATAAAAAAGCAATGGAAGAGGCAATTGAAGAAATGAATGGAATGGATTTGGATGGACGAACTATTACTGTTGATAAAGCTCAGCCTCACCAAGGTTCAGGTAGAGATTATGACGGTGACCGCGGTCGTGACCGTGGTCGTGACCGTGACCGTGGTCGTGATTATGGAGGTGGACGTGGATCAGGTGGAGGAGGAGATTGCTTTAAGTGTGGAAAGCCAGGACATTTTGCT…	MSEELEYRCFIGGLAWSTSDRSLKDAFDKFGKLVEAKVVVDKFSGRSRGFGFVTFDDKKAMEEAIEEMNGMDLDGRTITVDKAQPHQGSGRDYDGDRGRDRGRDRDRGRDYGGGRGSGGGGDCFKCGKPGHFARECPSEGSRGGGRYGSRDDKYGGGGGGGGGGSGRYGGGGGGPDRNGDRYSGRSRDSGGRSSSGSDRFSRDRSGPYERRATGGGFRSG	223.158	AT3G26420.1	2e-79	ATRZ-1A	RNA-binding (RRM/RBD/RNP motifs) family protein with retrovirus zinc finger-like domain			glycine-rich RNA-binding protein RZ1A
LOC18772809	PRUPE_6G361200	ATGACAGGCAAAGCCAAGCCAAAGAAGCACACAGCCAAGGAGATCGCGGCCAAGATCGACGCAGCGACCACCAACCGCGGCGGCGGCAAAGCCGGAATCGCTGACCGGACCGGAAAAGAGAAGGGAGGGCACGCCAAGATGGAGTGCCCGCACTGCAAGATTACGGCACCGGACGTGAAGTCGATGCAGATTCACCATGAAGCTCGACATCCAAAGATCCCTTTTGAGGAGGAGAAGATTGTGAATCGCCATGCCAGCACCAGCACCAGCACCAGCACCCAAGTCGCAGAACCCTCCAAGGACGCTAACAAGCCACGACCTGGCGTTCGCGGCAGTCTCAAGAAGTGA	MTGKAKPKKHTAKEIAAKIDAATTNRGGGKAGIADRTGKEKGGHAKMECPHCKITAPDVKSMQIHHEARHPKIPFEEEKIVNRHASTSTSTSTQVAEPSKDANKPRPGVRGSLKK	278.743	AT3G02790.1	7e-52		zinc finger (C2H2 type) family protein			uncharacterized
LOC18772818	PRUPE_6G040400	ATGGACCTACTCCTCCTGGAAAAGACCCTCCTGGGTCTCTTCATCGCCGTCATCGTCGCAATCACTATTTCGAAGCTCCGTGGCAAGCGGTTCAAGCTCCCGCCCGGTCCGATACCCGTACCAGTTTTCGGAAACTGGCTCCAGGTCGGCGACGACCTCAACCACCGGAACCTCACCGACCTCGCGAAAAAGTTCGGCGACATCTTCCTCCTACGCATGGGGCAGCGCAATTTGGTGGTGGTCTCGTCCCCTGACCTCGCCAAGGAGGTCCTCCACACCCAGGGCGTCGAATTCGGGTCGAGGACACGAAACGTCGTGTTCGATATTTTCACCGGGGAGGGCCAGGATATGGTGTTCACGGTCTACGGTGAGCACTGGAGGAAGATGAGGCGGATCATG…	MDLLLLEKTLLGLFIAVIVAITISKLRGKRFKLPPGPIPVPVFGNWLQVGDDLNHRNLTDLAKKFGDIFLLRMGQRNLVVVSSPDLAKEVLHTQGVEFGSRTRNVVFDIFTGEGQDMVFTVYGEHWRKMRRIMTVPFFTNKVVQQYRHGWESEAAAVVEDVKKYPGSATNGMVLRRRLQLMMYNNMYRIMFDRRFESEEDPLFMKLKGLNGERSRLAQSFDYNYGDFIPILRPFLRGYLKICKEVKEKRIRLFKDYFVDERKKLSSTKTTTNEGLKCAIDHILDAQQKGEINEDNVLYIVENINVAAIETTLWSIEWGIAELVNHPEIQKKLRDELDSVLGPGVQITEPDTQKLPYLQAVIKETLRLRMAIPLLVPHMNLNDAKLGSYDIPAESKILVN…	216.268	AT2G30490.1	0	ATC4H, C4H, CYP73A5, REF3	cinnamate-4-hydroxylase			trans-cinnamate 4-monooxygenase
LOC18772824	PRUPE_6G249900	ATGGCTCCACCAATTGAGACTGTTCAGAAAGTTGAGCCTCCTCAAAAAGTTATCGACTCCCATCATCATCATCATCATCATCATTCCTCACATCCACCTCTTAATGAGAGGATACTTTCTTCCATGACCAGGAGGTCTATAGCTGCACACCCTTGGCATGATCTTGAAATAGGACCTGGAGCTCCAAAGATTTTCAACTGTGTTATTGAAATTCCAAAAGGAAGCAAAGTGAAATATGAGCTTGACAAAAAAACTGGACTCATCAAGGTTGACCGCATACTGTACTCATCGGTTGTCTACCCCCACAACTATGGCTTCATCCCCCGAACTCTTTGTGAGGACAATGACCCCTTGGATGTCTTGATTATTATGCAGGAGCCAGTTGTTCCTGGATGCTTT…	MAPPIETVQKVEPPQKVIDSHHHHHHHHSSHPPLNERILSSMTRRSIAAHPWHDLEIGPGAPKIFNCVIEIPKGSKVKYELDKKTGLIKVDRILYSSVVYPHNYGFIPRTLCEDNDPLDVLIIMQEPVVPGCFLRAKAIGLMPMIDQGEKDDKIIAVCADDPEYRHYQDIKDLPPHRLAEIRRFFEDYKKNENKEVAVDDFLPASAAYDAIQHSMDLYADYIVESLRR	536.63	AT3G53620.1	3e-134	AtPPa4, PPa4	pyrophosphorylase 4			soluble inorganic pyrophosphatase 4
LOC18772841	PRUPE_6G024600	ATGTCGGAAAAGGGTAGGCCACTCCCTAAATTTGGTGAATGGGATGTCAATGATCCTGCTTCAGCTGAGGGGTTTACTGTGATCTTCAACAAGGCTAGGGATGAGAAGAAGACAGGTGGAAAACCTGAGTCACCAGGAAAGGCCGATCCTAATATAAGGCATGGAGTTGAGCCCGGCAGGCCTCCATCTAAAAAATGGTTTTGCTGCATTCATCAACCACCAGCCGAATCTTGA	MSEKGRPLPKFGEWDVNDPASAEGFTVIFNKARDEKKTGGKPESPGKADPNIRHGVEPGRPPSKKWFCCIHQPPAES	650.529	AT2G04410.1	3e-30		RPM1-interacting protein 4 (RIN4) family protein			RPM1-interacting protein 4
LOC18772859	PRUPE_6G315000	ATGGTGAGCTCAAAGACTTTCTTCGCTTTCGGAGCCCTAGCTCTGCTCTTTGCCGCGTCGGTCTTCGCAGACGATGTCGTTGTACTCACGGAGGAAAACTTTGAGAGCCACGTCGGTCAAGATCGGGCTGCTCTCGTCGAGTTCTACGCTCCCTGGTGTGGCCATTGTAAAAAGCTTGCTCCAGAGTATGAGAAGCTTGGCTCAAGTTTTAAGAAAGCAAAATCCATTTTAATTGGAAAGGTAGACTGTGATGAGCACAAGGGCGTTTGTAGCAAATATGGAGTTTCTGGGTATCCCACAATTCAATGGTTTCCAAAAGGATCCCTAGAACCCAAAAAGTATGAAGGTGGCCGCACTGCAGAAGCTCTTGCTGAGTTTGTGAATAAGGAAGGAGGGACC…	MVSSKTFFAFGALALLFAASVFADDVVVLTEENFESHVGQDRAALVEFYAPWCGHCKKLAPEYEKLGSSFKKAKSILIGKVDCDEHKGVCSKYGVSGYPTIQWFPKGSLEPKKYEGGRTAEALAEFVNKEGGTNVKISAAPSNVAVLTQDNFNEVVLDETKDVLVEFYAPWCGHCKSLAPTYEKVATAFKLEEGVVIANLDADKYKDLAEKYGVSGFPTLKFFPKNNKEGEEYGGGRDLEDFVDFINEKSGTSRDGKGQLTSKAGVLANLDDLVKEFVKAGNDEKKTIFSKIEEEVRKLEGSAARYGKIYLKAAENSLKKGADYAKNEIQRLERILEKSVNPTKADEFTLKKNILYTFASSS	383.075	AT2G47470.1	0	ATPDIL2-1, UNE5, MEE30, PDI11, ATPDI11	thioredoxin family protein			probable protein disulfide-isomerase A6
LOC18772872	PRUPE_6G193400	ATGAAGAGGCTTGGAAGCTCAGATTCATTGGGTGCTATGATTTCCATCTGCCCATCAACAGAGGAACAGAGTCCAAGAAACAACCATGTTTACCGGAGAGATTTCCAGTCCATGTTGGATGGCTTAGATGAAGAAGGGTGCGTGGAAGAGGGTGGCCATGTTTCCGAGAAGAAGAGAAGATTAAGCGTTGAACAAGTGAAGGCCTTGGAGAAAAATTTCGAGGTGGAGAACAAGCTTGAACCAGAAAGGAAAGTGAAGCTTGCCCAAGAACTTGGCCTCCAGCCAAGACAAGTTGCTGTGTGGTTTCAAAACCGCCGTGCTCGTTGGAAGACCAAGCAATTGGAACGTGACTTTGGCGTTCTCAAGGCCAATTATGACTCTCTCAAGCTCAATTATGAT…	MKRLGSSDSLGAMISICPSTEEQSPRNNHVYRRDFQSMLDGLDEEGCVEEGGHVSEKKRRLSVEQVKALEKNFEVENKLEPERKVKLAQELGLQPRQVAVWFQNRRARWKTKQLERDFGVLKANYDSLKLNYDNLQHENEALVKEIKQLKSKLQEENTESNNLSVKEEQMVAKDQSNYKVVDHELSKSPPPPPLGSSVPATESKELNFESFNNTNNGAVGLEAVSLFPDFKDGSSDSDSSAILNEDNSPNLTISSSGMLQNHQLMKSPASTSLKFNCCSSSSPSSSSMNCFQFQKTYHPQFVKIEEHNFFSSEEACSFFSDEQAPTLQWCCPDQWN	1655.91	AT2G22430.1	8e-76	ATHB6, HB6	homeobox protein 6	TF		homeobox-leucine zipper protein ATHB-6
LOC18772877	PRUPE_6G343800	ATGAGTACCGTGACTCATGAAGGGCAGCATCAGAAATATAGCTTGATAAATTTTGAAGAGACTGAACTGCGCCTGGGGTTGCCTGGTGGAATAGCTAATCCTGGAAAGGATGGAGAAGCTGCCAAGAACAATGGGAAGAGAGGTTTCTCAGAAACTGTTGATTTAAAGCTCAATATCTCATCTCAAGATGAGACAGCTGATGAGGATGATCAAGATCAACAACTACTGGAGTTGAAGAAGGAAAAGAATGCTGCTGCACCTGCTCCCGGGGCAAATGACCCATCTAAACCCCCTGCTTCCAAGGCTCAAGTTGTGGGTTGGCCACCCGTCCGATCTTTCCGAAAGAACATCGCGACCGTCCAAAAGAAGAGCTCGGACGAGGGTGAAAAGAGCAACAGC…	MSTVTHEGQHQKYSLINFEETELRLGLPGGIANPGKDGEAAKNNGKRGFSETVDLKLNISSQDETADEDDQDQQLLELKKEKNAAAPAPGANDPSKPPASKAQVVGWPPVRSFRKNIATVQKKSSDEGEKSNSNISAAFVKVSMDGAPYLRKVDLKLYKSYQELSTALGKMFSSFTIGNCGSDGMKDFMNESKLIDLLNGSDYVPTYEDKDGDWMLVGDVPWGMFVDSCKRLRIMKGSEAIGLAPRAVEKCKNRC	824.271	AT3G04730.1	6e-107	IAA16	indoleacetic acid-induced protein 16			auxin-responsive protein IAA16
LOC18772925	PRUPE_6G310300	ATGTCTCTTGTGACAGCAGAGATCAAGAGCAAGGCTGATGAGTTGTACCATGGAGATGGAATCTGCCAAGAAAAGTCAAAGAAATTGCTCACAGAAATCAGCCTGCCCAATGGCCTCTTGCCCTTGAAAGACATGGAGGAATGTGGTTATGTGAAGGAGACTGGGTTTGTGTGGCTTAAGCAGAAGAAGAGCACAACCCACAAGTTTGAAAAGATTGGGAAGCTGGTCAGTTATGCCCCTGAAGTCACAGCCTATGTTGAGAATGGCAAGATCAAGAAGCTCACCGGGGTCAAGACCAAGGAGCTCTTGGTTTGGGTGTCACTCAGTGACATTTACGTTGATGACCCTCCAACTGGGAAAATCACTTTCAAGACTCCTTCTGGGCTTTTTAGGACTTTC…	MSLVTAEIKSKADELYHGDGICQEKSKKLLTEISLPNGLLPLKDMEECGYVKETGFVWLKQKKSTTHKFEKIGKLVSYAPEVTAYVENGKIKKLTGVKTKELLVWVSLSDIYVDDPPTGKITFKTPSGLFRTFPVSAFENEEAANKDVKDKKEVKEAKGAVEV	1540.43	AT1G09310.1	8e-63		Protein of unknown function, DUF538			uncharacterized
LOC18772958	PRUPE_6G314700	ATGTTCTTGTTCGATTGGTTCTATGGGGTTCTTGCATCGCTCGGCTTGTGGCAGAAGGAGGCCAAGATCTTGTTTTTGGGTCTCGACAATGCTGGCAAAACCACGTTACTTCATATGCTTAAAGATGAGAGATTAGTTCAACACCAGCCGACGCAGTATCCGACATCAGAAGAGTTAAGCATTGGGAAAATCAAGTTCAAGGCTTTTGATTTGGGTGGACATCAGATTGCTCGCAGAGTTTGGAAAGATTACTATGCCAAGGTGGATGCAGTGGTTTACCTAGTGGATGCTTACGACAAGGAAAGATTTGCCGAGTCGAAAAAAGAGCTAGATGCTCTTCTCTCTGATGAGGGGTTGGCCAATGTTCCATTCCTTATTCTGGGAAACAAGATTGACATA…	MFLFDWFYGVLASLGLWQKEAKILFLGLDNAGKTTLLHMLKDERLVQHQPTQYPTSEELSIGKIKFKAFDLGGHQIARRVWKDYYAKVDAVVYLVDAYDKERFAESKKELDALLSDEGLANVPFLILGNKIDIPYAASEEELRFHLGLNNFTTGKGKVNLTDSNVRPLEVFMCSIVRKMGYGDGFKWLSQYIK	202.062	AT4G02080.1	8e-136	ASAR1, ATSARA1C, ATSAR2, SAR2	secretion-associated RAS super family 2			GTP-binding protein SAR1A
LOC18772964	PRUPE_6G051000	ATGGCTAGAGGATTGAAGAAGCATCTGAAGAGGCTCAATGCCCCAAAGCATTGGATGCTCGACAAACTTGGGGGTGCTTTTGCTCCCAAGCCATCATCTGGGCCTCACAAATCTAGGGAGTGCCTTCCACTGATCCTCATCCTGAGGAACAGGTTGAAGTATGCTCTCACATACCGTGAGGTCGTTTCCATTCTCATGCAGCGTCATATTTTGGTTGATGGCAAGGTTAGGACCGATAAGACCTACCCTTCTGGATTCATGGATGTTGTTTCCATCCCAAAAACAAATGAGAATTTCCGTCTGCTTTATGACACCAAGGGTCGGTTCCGGCTCCACTCAATTAGAGATGAGGAGTCTAAGTTCAAGCTATGCAAGGTCCGGTCAGTGCAGTTTGGGCAG…	MARGLKKHLKRLNAPKHWMLDKLGGAFAPKPSSGPHKSRECLPLILILRNRLKYALTYREVVSILMQRHILVDGKVRTDKTYPSGFMDVVSIPKTNENFRLLYDTKGRFRLHSIRDEESKFKLCKVRSVQFGQKGIPYINTYDGRTIRYPDPLIKANDTIKLDLETNKITDFIKFDVGNVVMVTGGRNRGRVGVIKNREKHKGSFETIHVQDATGHEFATRLGNVFTIGKGTKPWVSLPKGKGIKLTILEEAKKRQAAAQAAATA	605.036	AT5G58420.1	0		Ribosomal protein S4 (RPS4A) family protein			40S ribosomal protein S4
LOC18773012	PRUPE_6G095200	ATGGGTAAAGAGAAGTTTCACATCAACATTGTGGTCATTGGCCATGTCGACTCCGGGAAATCAACCACCACCGGTCACTTGATCTACAAGCTTGGTGGTATTGACAAGCGTGTTATTGAGAGGTTTGAGAAGGAGGCTGCTGAGATGAACAAGAGGTCATTCAAGTATGCCTGGGTGTTGGACAAGCTCAAGGCTGAGCGGGAACGTGGTATTACTATTGATATTGCCTTGTGGAAGTTTGAGACCACCAAGTACTACTGCACAGTTATTGATGCACCTGGACATCGTGACTTCATCAAGAACATGATTACTGGAACCTCCCAGGCTGATTGTGCTGTCCTCATTATTGATTCCACCACTGGTGGTTTTGAAGCTGGTATTTCCAAGGATGGTCAGACC…	MGKEKFHINIVVIGHVDSGKSTTTGHLIYKLGGIDKRVIERFEKEAAEMNKRSFKYAWVLDKLKAERERGITIDIALWKFETTKYYCTVIDAPGHRDFIKNMITGTSQADCAVLIIDSTTGGFEAGISKDGQTREHALLAFTLGVKQMICCCNKMDATTPKYSKARYDEIVKEVSSYLKKVGYNPDKIAFVPISGFEGDNMIERSTNLDWYKGPTLLEALDLINEPKRPSDKPLRLPLQDVYKIGGIGTVPVGRVETGVVKPGMVVTFGPTGLTTEVKSVEMHHEALQEALPGDNVGFNVKNVAVKDLKRGFVASNSKDDPAKEAANFTSQVIIMNHPGQIGNGYAPVLDCHTSHIAVKFSEILTKIDRRSGKEIEKEPKFLKNGDAGMVKMIPTKPMV…	1567.17	AT5G60390.3	0		GTP binding Elongation factor Tu family protein			elongation factor 1-alpha
LOC18773013	PRUPE_6G257200	ATGGCAACGGTGGCAGTGGCACCACGTGTCCCCTTGGTGATCTCAAATATTAATTGTAGATTTAGCAACAGTCGCAGCGTCCGTCAATGTCATAAATGTAGTTGGGTGGCACATCCAGAAAGTTCGAGCCTTTATTTTCATTATTCGACTTCATTTTCTGCTTCATCCGTGTTTGTCCAGAGAAGGGTGAGAAAGGGTTTTAGGAGTGTACGAGTGATCACAAAGGCGATGGCGGATTCGGGTCCAAGCACAGTCCTTGTCACTGGAGCTGGTGGTAGAACTGGTAAAATAGTTTATAAGAAGTTAAGGGAGGCAGACCAGTATGTTGCTAGGGGTCTGGTTAGGACAGAAGAGAGCAAAGAGAGCATTGGTGGAGCAGATGATATTTTTATTGGAGAT…	MATVAVAPRVPLVISNINCRFSNSRSVRQCHKCSWVAHPESSSLYFHYSTSFSASSVFVQRRVRKGFRSVRVITKAMADSGPSTVLVTGAGGRTGKIVYKKLREADQYVARGLVRTEESKESIGGADDIFIGDIRDANSILPAIQGIDALVILTSAVPKMKPGFDPTKGGRPEFYFDDGSYPEQVDWIGQKNQIDAAKAAGVKQIVLVGSMGGTDINNPLNSLGNGNILVWKRKAEQYLADSGVPYTIIRAGGLQDKEGGIRELLIGKDDELLKTETRTIARADVAEVCIQALQFEEAKFKAFDLASKPEGTGTPTKDFKALFSQITTRF	276.734	AT2G37660.1	2e-165		NAD(P)-binding Rossmann-fold superfamily protein			uncharacterized protein At5g02240
LOC18773038	ALMOND_2B007519	ATGGCAACCATCAATGGCTTCCACCCTCCCATGTCCACCCTCCATAGCCAAAAAACAAAGCTCCAAGTCCCCCATGCCACTTTGCATAGCCTGCCTTTGACTTCTGATCAGCAGCATCCCATGTTGGCTTATCAAAGATCATCATTCACCAAATTCCCATATGATCATCAATTGATCAGAGCTCATCACAGACTGCTAATTACCAAGGTGACTCAGGCATCAGAAAAATCTCCACCAGAAACTCAAAATCCTGCAGATAAATCTCCATTATCTACTTGGAAAAACTGGATTGTGGGATTAATGCTGTCAATAATAATACCTTCTTTGAGACACAAATGGGGACCCTTGCTGGCCCTTAAAAGCAAGGTGGACATGGCAGTAGACACAGTGGAATCTGTG…	MATINGFHPPMSTLHSQKTKLQVPHATLHSLPLTSDQQHPMLAYQRSSFTKFPYDHQLIRAHHRLLITKVTQASEKSPPETQNPADKSPLSTWKNWIVGLMLSIIIPSLRHKWGPLLALKSKVDMAVDTVESVTEVVEELAEEVEKVAEQVEDKLPEDAKLREAVESVEHLAEDAVKKAELAKDVIHKVEEVEEEVEKALTNGSDVDSVKGEGEKKS	375.325	AT2G14095.1	5e-14		unknown protein; FUNCTIONS IN: molecular_function unknown; INVOLVED IN: biological_process unknown; LOCATED IN: mitochondrion; EXPRESSED IN: 7 plant structures; EXPRESSED DURING: 4 anthesis, C globular stage, petal differentiation and expansion stage; Has 106 Blast hits to 103 proteins in 21 species: Archae - 0; Bacteria - 5; Metazoa - 0; Fungi - 4; Plants - 87; Viruses - 0; Other Eukaryotes - 10…			uncharacterized
LOC18773046	PRUPE_6G296100	ATGGCCTCCAAACGCATCTTGAAAGAGCTTAAGGATTTGCAGAAAGATCCTCCAACTTCTTGCAGCGCCGGTCCTGTGGCTGAGGACATGTTTCACTGGCAAGCTACGATTATGGGACCCCCTGATAGCCCATATGCAGGAGGTGTATTCCTAGTCACCATTCATTTTCCTCCTGATTATCCTTTCAAGCCCCCTAAGGTTGCATTTAGGACTAAGGTCTTCCACCCAAATATCAACAGCAATGGAAGCATTTGTCTTGATATCCTTAAAGAACAATGGAGCCCAGCACTAACTATCTCTAAGGTATTGCTCTCAATTTGCTCACTGTTGACTGACCCTAATCCTGATGACCCTCTTGTGCCGGAGATTGCCCACATGTATAAAACCGATCGAGCCAAG…	MASKRILKELKDLQKDPPTSCSAGPVAEDMFHWQATIMGPPDSPYAGGVFLVTIHFPPDYPFKPPKVAFRTKVFHPNINSNGSICLDILKEQWSPALTISKVLLSICSLLTDPNPDDPLVPEIAHMYKTDRAKYESTARSWTQKYAMG	1332.1	AT1G64230.2	1e-106	UBC28	ubiquitin-conjugating enzyme 28			ubiquitin-conjugating enzyme E2 28
LOC18773065	PRUPE_6G122400	ATGTCAGAAGAAACACCCTTCCGACCACGTGAGAAGCTCCTCGAGAAGCAAAAATTTTTCCAAAGCATCCACAAATACACATATCTGAAGGGACCCTATGATAAGATCACCTCTGTTGCCATTCCAGCTGCTTTAGCTGCATCTTCTTTGTTCCTTATTGCACGAGGAGTCTACAACATGTCACATGGGATTGGAAAGAAGGAATGA	MSEETPFRPREKLLEKQKFFQSIHKYTYLKGPYDKITSVAIPAALAASSLFLIARGVYNMSHGIGKKE	311.846	AT4G21105.1	3e-34		cytochrome-c oxidases;electron carriers			uncharacterized
LOC18773079	PRUPE_6G292600	ATGGCTTACTCTGCCATGACTAAGCTTGCTTTGGTGGTGGCCTTGTGCATGGTTGTGAGCGTGCCCATTGCTCAAGCCATAACATGTGGCCAAGTGTCCAGCAGCCTTGCACCATGCATACCCTACGTGAGAGGCGGTGGAGCTGTGCCTCCAGCTTGCTGCAACGGCATTAGGAACGTCAACAACTTGGCAAGGACCACCCCTGACCGCCAGGCCGCTTGCAACTGCCTGAAACAGCTTTCCGCCAGCGTCCCCGGAGTCAACCCTAACAATGCCGCAGCGCTTCCCGGCAAGTGTGGAGTTAGTATTCCTTACAAGATTAGCGCCTCCACCAACTGCGCCACCGTGAAGTGA	MAYSAMTKLALVVALCMVVSVPIAQAITCGQVSSSLAPCIPYVRGGGAVPPACCNGIRNVNNLARTTPDRQAACNCLKQLSASVPGVNPNNAAALPGKCGVSIPYKISASTNCATVK	4043.43	AT5G59320.1	8e-37	LTP3	lipid transfer protein 3			non-specific lipid-transfer protein 1
LOC18773101	PRUPE_6G303700	ATGCCGAGTGAAGGAACAGCAAACTTCATAGACATCCTCATAGCCATCCTCTTGCCTCCTCTTGGCGTCTTCCTCAAGTTTGGCTGCCATGTTGAATTCTGGATCTGTCTCTTGCTGACTATTTTTGGTTACATCCCTGGGATTATCTATGCTGTCTATGCCATAACTAAATGA	MPSEGTANFIDILIAILLPPLGVFLKFGCHVEFWICLLLTIFGYIPGIIYAVYAITK	400.679	AT3G05880.1	2e-24	RCI2A	Low temperature and salt responsive protein family			hydrophobic protein RCI2A
LOC18773114	PRUPE_6G307500	ATGGGGTCTGAAGGACCTTCAACAGTAACAATTCATGTGACTGGTTTTAAGAAATTCCATGGAGTTTCAGAGAATCCAACTGAGACTATTGTCAGTAATCTCAAAGAGTATGTGAAGAAGAAGGGTTCACCAAAGGGTCTGGTTCTTGGAAGTTGCAGCATTCTTGAGACTGCAGGACAAGGAGCAGTTGTTCCCCTATACCAGACATTGCGATCTGCTATCAGCGAGCAGGATTCTTCAAATTCCAGTAGAATTATTTGGGTACACTTTGGTGTTAATAGTGGTGCAACAAGGTTTGCTATTGAGCATCAAGCTGTCAATGAAGCTACTTTTCGTTGCCCTGATGAGATGGGATGGAAGCCTCAGAAAGTCCCCATTATTCCTTCAGATGGTGGAATT…	MGSEGPSTVTIHVTGFKKFHGVSENPTETIVSNLKEYVKKKGSPKGLVLGSCSILETAGQGAVVPLYQTLRSAISEQDSSNSSRIIWVHFGVNSGATRFAIEHQAVNEATFRCPDEMGWKPQKVPIIPSDGGISHIRETSLPVEDITKALAKKGFEVMTSDDAGRFVCNYVYYHSLRFAEQNGIKSLFVHVPLFLTIDEDTQMQFAASLLEVLTSLN	305.388	AT1G56700.2	2e-117		Peptidase C15, pyroglutamyl peptidase I-like			pyrrolidone-carboxylate peptidase
LOC18773147	PRUPE_6G284700	ATGTCGAACCCAACCCCACCTCCGATCCTTCCGGTCTCAACCACGTCCACAACCACCGCCGGCTCCGTCCAATCCCAGGCCCCGATCGCCACCCCAGCCTTCCGCGCCTTCATCACCCACATCTCGGAAAATCTCCGCAACGGCCTCTCCCAGCGCCGCCCCTGGACCGAGCTCTTCGACCGCTCCGCCTTCGCCAAGCCCGAGTCGCTCTCCGAAGCCACCGGTCGCGTCCGCAAGAACTACTCCTACTTCCGCGTCAACTACCTCGCCACCATCGCTCTCATCGTCGCCGTCTCCCTCTTCACCCACCCATTCTCTCTCCTCGTCCTCCTCGGTCTCCTCGCCGGCTGGCTCTTCCTCTACCTCTTCCGGCCCTCCGATCAGCCCCTCGTCATCTTC…	MSNPTPPPILPVSTTSTTTAGSVQSQAPIATPAFRAFITHISENLRNGLSQRRPWTELFDRSAFAKPESLSEATGRVRKNYSYFRVNYLATIALIVAVSLFTHPFSLLVLLGLLAGWLFLYLFRPSDQPLVIFGRTFSDTQTLWGLIAFSIFVVFLTSVGSLLISALLVGAAVVFAHGAFRVPEDLFLDEQEPTASTGFLSFLNGAASNVAAATAPAVIAARG	233.299	AT2G38360.1	6e-94	PRA1.B4	prenylated RAB acceptor 1.B4			PRA1 family protein B1
LOC18773161	PRUPE_6G242600	ATGGCCGCCGCAGCTGCAGCAGCTCGTCCCCTCGTCACCGTCCAAACCCTAGATGGCGACATGGCCACTGACCAGTCCCAAACCGTCGCCTTACCCGACGTCATGAAAGCGTCCATCCGCCCAGACATCGTCACCTTCGTCCACGCAAACATCTCAAAGAACAGCAGGCAACCCTACGCCGTTTCGAAGAAGGCCGGTCATCAGACCTCCGCCGAGTCTTGGGGTACCGGACGCGCCGTCTCACGTATCCCACGTGTCCCCGGCGGCGGGACCCACCGCGCTGGGCAGGGAGCATTCGGAAACATGTGCCGTGGTGGTCGCATGTTCGCTCCCACCAAGATCTGGCGCCGCTGGCACCGCAAGATCAACGTGAACCAGAAGCGATATGCCGTCGTTTCG…	MAAAAAAARPLVTVQTLDGDMATDQSQTVALPDVMKASIRPDIVTFVHANISKNSRQPYAVSKKAGHQTSAESWGTGRAVSRIPRVPGGGTHRAGQGAFGNMCRGGRMFAPTKIWRRWHRKINVNQKRYAVVSAIAASAVPSLVLARGHKIETVPELPLVVSDSAEGVEKTSAALKLLKQIGAYADAEKAKDSHAIRPGKGKMRNRRYINRKGPLIVYGTEGAKLVKAFRNIPGVDIINVERLNLLKLAPGGHLGRFVIWTKSAFEKLDSIYGSFDKVSEKKKGYVLPRSKMVNADLARIINSDEVQSVVRPIKKEFKRAPLKKNPLKNLNTLLKLNPYAKTARRMALLAEEQRVKAKKEKLDKKRKPISKEEASTIKAAGKAWYKTMISDSDYTEFEN…	560.644	AT3G09630.1	0		Ribosomal protein L4/L1 family			60S ribosomal protein L4
LOC18773174	PRUPE_6G322500	ATGGAGTGCAGGCCTTTGGAGATAACAATCGTCTCAGCCAGCGACCTCAAGGATGTCAATATGTTCTCCAAGATGGACGTCTACGCCGCCGTTTCGGTCTCCGGCGACCCCCGCAACAAGAAGCAGACGACCAAGACCCCCGTCGCCAAAGACGGCGGCACAAACCCTAAGTGGAACAACTACTCCATCAAGTTCACTCTCGACGACGCCGCTTTGCTCCACAACCGCCTCACTCTCAACATCAAGCTCGTCTCCGAGCGCAGCTTGGGCGACACCAAGATCGGCAAAGTCCAAATCCCCCTCAAGGAGCTCTTCGACAGCTTGGGCGGCGGTGATGATCAGAAGAAGCAGATCAAGCACGTCGGTTACAGCGTTCGAACTTCCAGTGGGAAGCCCAAA…	MECRPLEITIVSASDLKDVNMFSKMDVYAAVSVSGDPRNKKQTTKTPVAKDGGTNPKWNNYSIKFTLDDAALLHNRLTLNIKLVSERSLGDTKIGKVQIPLKELFDSLGGGDDQKKQIKHVGYSVRTSSGKPKGSINFGYKFGDKFTVPVPEAHKKTHEPVMAYPSGHPGSSSGYPPAAHAGPYPPAQAYPYPPPGGYPPPPHQQPGYGYAPPPQAGYGYPPQSGYGYPPQKPKRGGGNMALGMGAGLLGGLLIGDMIGDVGEMAAYDAGYDAGFGGDDFGGGFDF	219.666	AT1G09070.1	5e-56	SRC2, (AT)SRC2	soybean gene regulated by cold-2			protein SRC2
LOC18773190	PRUPE_6G348500	ATGAAGAACCCGAAAGTTTTCTTTGACATATTGATTGGAAAGATGAAGGCGGGCCGAGTTGTAGTGGAATTATTTTCTGATGTGACACCGAAAACTGCTGAAAATTTTCGGGCTCTTTGCACTGGAGATAAGGGGATTGGAGCAGCAGGGAAGCCACTGCACTTTAAGGGCTCTACATTTCATCGCATCATCCCGAATTTCATGTGTCAGGGTGGAGATTTCACAAGAGGTAATGGGACTGGAGGAGAGTCGATTTATGGCACGAAATTTGCAGATGAAAACTTCAAGTTGAAGCATACAGGGCCTGGAATTTTGTCCATGGCCAATGCTGGACCAAACACTAATGGTTCCCAGTTCTTCATTTGCACTGACAAGACCCCTTGGCTCGATGGAAAGCAT…	MKNPKVFFDILIGKMKAGRVVVELFSDVTPKTAENFRALCTGDKGIGAAGKPLHFKGSTFHRIIPNFMCQGGDFTRGNGTGGESIYGTKFADENFKLKHTGPGILSMANAGPNTNGSQFFICTDKTPWLDGKHVVFGKVVEGYTVVKEMEKVGSDSGTTSQPVVIEDCGQIKDEN	233.633	AT3G56070.2	2e-105	ROC2	rotamase cyclophilin 2			peptidyl-prolyl cis-trans isomerase CYP19-3
LOC18773231	PRUPE_6G361000	ATGGCCTCTGCTTCACCAATGGCCAGCCAGCTCAAATCCAACTTCACCTCCCCAATCACTAGACCTGCTTTGGTTTCACCCAAAGGCCTCTCTGCCTCTCCCCTAAGCCTCTTGCCTTCTAAAAGACTCTCTTCCTTCACCATCAAGGCCGTCCAATCTGACAAGCCAACTTTCCAAGTGATTCAGCCCATCAATGGTGATCCCTTCATTGGAAGCCTGGAGACTCCAGTGACATCTAGCCCATTGATTGCCTGGTACTTGTCCAACCTCCCAGCCTACAGGACTGCTGTGAGCCCACTTCTCAGGGGTATTGAGGTGGGCCTGGCTCATGGGTTCTTGCTGGTGGGCCCATTCGTCAAGGCTGGTCCATTGAGGAACACACCCTATGCTGGGGGAGCT…	MASASPMASQLKSNFTSPITRPALVSPKGLSASPLSLLPSKRLSSFTIKAVQSDKPTFQVIQPINGDPFIGSLETPVTSSPLIAWYLSNLPAYRTAVSPLLRGIEVGLAHGFLLVGPFVKAGPLRNTPYAGGAGSLAAAGLVVILSLCLTIYGISSFKEGDPSTAPALTLTGRKKEPDQLQTAEGWAKFTGGFFFGGISGVTWAYFLLYVVNLPYYVK	1526.32	AT4G12800.1	1e-106	PSAL	photosystem I subunit l			photosystem I reaction center subunit XI, chloroplastic
LOC18773387	PRUPE_6G081700	ATGCAGGACCCTCTAAACATGTCCCTCGACGACCTCATCAAGACCAGCAAGAAATCCGGATCGGGCAACGCTCGAGGCCGTGGCCGGGCCTCAGGACCCGGACCCGCCCGCCGGTTGCCCAATCGTGCCGCCAATCGTACGACGCCGTATGCGGCGGCCAAGGCGCCGGAGACCGCGTGGCAACACGACCTGTATACGGATCAGGGGGCGGCGGCGTTCCCGGCTCAAGCTGGAAGAGCCTCGGCCATTGAAACTGGAACCAAGCTCTACATCTCCAATCTCGATTATGGCGTTTCCAACGAGGACATTAAGGAACTGTTTTCAGAGGTTGGTGACCTGAAGCGATATGGAGTACATTATGACCGAAGTGGGAGATCGAAGGGAACGGCAGAAGTAGTC…	MQDPLNMSLDDLIKTSKKSGSGNARGRGRASGPGPARRLPNRAANRTTPYAAAKAPETAWQHDLYTDQGAAAFPAQAGRASAIETGTKLYISNLDYGVSNEDIKELFSEVGDLKRYGVHYDRSGRSKGTAEVVFSRRPDAVAAVKRYNNVQLDGKPMKIEIVGTNISTPGGPPTLPPAANGNFGNSNGVPRGGQSRGGAFGRIRGGGGRGPRRGGRGRGSGNGGGRGRGGEKVSAEDLDAELEKYHAEAMQE	354.755	AT5G59950.1	4e-74		RNA-binding (RRM/RBD/RNP motifs) family protein			THO complex subunit 4A
LOC18773508	PRUPE_6G193100	ATGTGGGTCTTCTACCTGATCTCGTTGCCCCTGACCTTGGGCATGGTCCTTTTTACGCTCAAGTACTTCGCAGGCCCGGAGGTCCCTCGCTATGTTTTGCTCACCGTTGGGTACACCTGGTTCTGTTCTCTCTCCATCATCGTCATTGTGCCCGCTGACATCTGGACGACGGTAAATCATATTGAGAGTGGAGGAATCTCATTCTTTTGGAGCTGGTCATATTGGAGTACATTTTTACTAACTTGGACTGTGGTGCCCCTTATTCAGGGTTTTGAAGATGCTGGAGACTTCACTGTGACAGAGAGATTGAAGACTAGTGTACATGTTAACTTACTTTTCTATCTAATTCTGGGAGCTATTGGCCTTTTTGGACTGGTTCTTCTCATCATGATGCACAAG…	MWVFYLISLPLTLGMVLFTLKYFAGPEVPRYVLLTVGYTWFCSLSIIVIVPADIWTTVNHIESGGISFFWSWSYWSTFLLTWTVVPLIQGFEDAGDFTVTERLKTSVHVNLLFYLILGAIGLFGLVLLIMMHKNWGGGVLGFAMGCSNTFGLVTGAFLLGFGLSEIPKGLWKNSDWTIRQKVLSHKIAKMAVKLDDAHQDLSNAIVVAQATSTQMSKRDPLRPYMDIIDNLLAQMFKEDPSFKPQGGRLGENDMDYDTDEKSMATLRRHLRGAREEYYRYKSEYMTYVMEALELEDTIKNYERRNSTGWKYVSTFRPSRTGRLGSILDTIEFFWRCILRKEVEKLLAIILGIISAAILLAEATLLPRVDLSLFSILINSVSKQEVLVQVFAFVPLMYMC…	443.827	AT5G65290.1	0		LMBR1-like membrane protein			LMBR1 domain-containing protein 2 homolog A
LOC18773513	PRUPE_6G042400	ATGACTTTCAAGAGAAGAAACGGCGGGAGAAACAAGCATGGCCGTGGCCATGTGAAGTTCATCCGTTGCTCTAACTGTGGCAAATGCTGCCCTAAGGACAAAGCTATCAAGAGGTTTCTGGTGAGGAACATTGTTGAGCAAGCTGCAGTTAGGGATGTCCAGGAGGCTTGTGTTTATGATGCTTACACTCTTCCTAAGCTGTATGCAAAGATGCAATACTGTGTTTCTTGCGCCATCCACTCTCACGTTGTGAGGGTTCGATCGCGGGAAAACAGGAGGAACCGTGAACCCCCACAGCGTTTCAGGCGTCGGGAGGATACACCTAGGCCTGCTGCTCCTGGTGCACCTGGTCAGGCTCCACGCCCAGCTGGAGCACCAGCTGCTCGGCCATGA	MTFKRRNGGRNKHGRGHVKFIRCSNCGKCCPKDKAIKRFLVRNIVEQAAVRDVQEACVYDAYTLPKLYAKMQYCVSCAIHSHVVRVRSRENRRNREPPQRFRRREDTPRPAAPGAPGQAPRPAGAPAARP	378.817	AT3G56340.1	5e-66		Ribosomal protein S26e family protein			40S ribosomal protein S26-3
LOC18773525	PRUPE_6G293000	ATGGCTAGCTCTGGACAGCTCCTCAAGCTCGTTTGCCTTGTGGCGGTGATGTGCTGCATGGCGGTTGGTGGTCCCAAGGCCATGGCAGCTGTGTCATGCGGCCAGGTGGTGAACAATCTGACCCCATGCATAAACTACGTGGCAAACGGTGGGGCGTTGAACCCTAGTTGCTGCACTGGGGTCAGGTCTCTCTACAGCTTGGCTCAGACCACAGCTGACCGCCAGAGCATCTGCAACTGCTTGAAGCAAGCCGTCAATGGCATCCCTTACACCAATGCAAATGCTGGGCTTGCCGCTGGCCTTCCTGGCAAGTGTGGGGTCAATATTCCTTACAAGATCTCTCCTTCTACTGACTGCAAAAGCATCAAGTGA	MASSGQLLKLVCLVAVMCCMAVGGPKAMAAVSCGQVVNNLTPCINYVANGGALNPSCCTGVRSLYSLAQTTADRQSICNCLKQAVNGIPYTNANAGLAAGLPGKCGVNIPYKISPSTDCKSIK	1248.72	AT2G38540.1	4e-32	LP1, LTP1, ATLTP1	lipid transfer protein 1			non-specific lipid-transfer protein 3
LOC18773532	PRUPE_6G028600	ATGGCGGAGACTGAGACGTTTGCCTTCCAGGCCGAGATCAACCAGCTTCTGAGTTTGATCATCAACACCTTCTACAGCAACAAGGAGATCTTTCTCCGTGAGCTCATAAGTAACGCCTCCGATGCTCTTGACAAGATTAGATTTGAGAGTTTGACTGACAAGAGCAAGCTCGATGGTCAGCCAGACCTCTTTATCCACATCATCCCTGACAAAACCAACAATACCTTGACTATTATTGACAGTGGTATTGGGATGACCAAAGCTGATTTGGTGAACAACCTCGGTACCATTGCAAGGTCTGGCACCAAGGAATTTATGGAAGCTTTGGCCGCTGGTGCTGATGTTAGCATGATCGGTCAGTTTGGTGTTGGGTTCTATTCTGCTTATCTTGTTGCAGAC…	MAETETFAFQAEINQLLSLIINTFYSNKEIFLRELISNASDALDKIRFESLTDKSKLDGQPDLFIHIIPDKTNNTLTIIDSGIGMTKADLVNNLGTIARSGTKEFMEALAAGADVSMIGQFGVGFYSAYLVADKVIVTTKHNDDEQYVWESQAGGSFTVTRDNSGEVLGRGTKITLHLKEDQLEYLEERRLKDLVKKHSEFISYPISLWIEKTTEKEISDDEDEEEKKEEEGKVEDVDEEKEKEEKKKKKIQEVSHEWSLVNKQKPIWMRKPEEITKEEYSAFYKSLTNDWEEHLSVKHFSVEGQLEFKAILFVPKRAPFDLFDTRKKPNNIKLYVRRVFIMDNCEELIPEYLGFVKGIVDSEDLPLNISREMLQQNKILKVIRKNLVKKCIEMFQEIA…	5235.7	AT5G56000.1	0	Hsp81.4, AtHsp90.4	HEAT SHOCK PROTEIN 81.4			heat shock protein 90-2
LOC18773569	PRUPE_6G004100	ATGAGGGAGATTATAAGCATACATATTGGGCAGGCTGGAATTCAGGTGGGGAATTCATGTTGGGAACTCTATTGTCTTGAGCATGGAATTCAACCCGATGGGCAGATGCCCAGTGATGCCTCAGTGGGTGTTGGCCGCGACGCTTTCAATACCTTCTTCAGTGAGACTGGATCAGGCAAGCACGTCCCTAGGGCCATATTTGTCGATTTGGAACCAACTGTTATTGATGAAGTAAGGACTGGGACTTACCGCCAACTCTTCCACCCCGAGCAGCTCATTTCTGGGAAAGAAGATGCTGCTAATAATTTTGCAAGAGGACACTATACAGTCGGAAAGGAAATTGTAGATCTCTGCCTTGATCGAGTAAGGAAATTGGCCGATAATTGCACTGGTTTACAA…	MREIISIHIGQAGIQVGNSCWELYCLEHGIQPDGQMPSDASVGVGRDAFNTFFSETGSGKHVPRAIFVDLEPTVIDEVRTGTYRQLFHPEQLISGKEDAANNFARGHYTVGKEIVDLCLDRVRKLADNCTGLQGFLVFNAVGGGTGSGLGSLLLERLSVDYGKKSKLGFTIYPSPQVSTAVVEPYNSVLSTHSLLEHTDVSVLLDNEAIYDICRRSLDIERPTYTNLNRLISQVISSLTTSLRFDGAINVDVTEFQTNLVPYPRIHFMLSSYAPVISAEKAYHEQISIPEITNAVFEPSSMMAKCDPRHGKYMACCLMYRGDVVPKDVNAAVATIKTKRTVQFVDWCPTGFKCGINYQPPTVVPGGDLAKVQRAVCMISNNTAVAEVFSRIDHKFDLMY…	214.547	AT5G19780.1	0	TUA5	tubulin alpha-5			tubulin alpha-3 chain
LOC18773609	PRUPE_6G240600	ATGGCGATCAACAACAGGGAGAGCAACGTCCAAGAGGAATCGAACCCTCTTCTGAGCCAGCAATTCGAGGAGCCTCAGAAGGATGCTGAAAAGCCCGCCAAGGCCTCGCCGGAGACTCAGTCGCCGGAGAAATCTCAGGCAGAGATGGGCCATGTGAATGGCGGTGGTAATGGCTGCGGGTGGACCGCCGATGGGCTGCCGTTGGGGCACGGGAGCGTGATGGGTGAGCCCATGGGCCGGGCCCAGTGGGACTCCGGCCTTCTTGCATGTCTCGGCCGTAATGATGATTTCTGTAGCAGCGATCTTGAAGTTTGCCTTCTTGGAAGTGTGGCTCCTTGTGTGTTGTATGGAAGCAATGTTGAGAGACTTGGATCTACTCCTGGGACGTTTGCAAATCAC…	MAINNRESNVQEESNPLLSQQFEEPQKDAEKPAKASPETQSPEKSQAEMGHVNGGGNGCGWTADGLPLGHGSVMGEPMGRAQWDSGLLACLGRNDDFCSSDLEVCLLGSVAPCVLYGSNVERLGSTPGTFANHCLSYYGLYLIGNTFFGWNCLAPWFSYPSRTAIRRKFNLEGSCEALHRSCGCCGSFVEDEVQQEQCETACDFATHVFCHACALCQEGREIRRRMLHPGFNAQPVLVMIPPGEQAMGRGA	226.411	AT2G37110.1	5e-111		PLAC8 family protein			cell number regulator 8
LOC18773611	PRUPE_6G283700	ATGTCTTTGAGGCTGATTTCAACATTTTCCATCCCAAACAAGCAAGGGGATGGTGCTATGAGCAGCCTCTTGCTGTGCTCAAAGGCTGGATCTTCCTCCTCTGATCTGAGCCGTGCTTTTTCTCTAAGTTTCCGTGAGCAGAGGAAGCTCAACAAGTTTGCGGTTTCCGCGTCAACCGAGACGAAGACAGCGACGCTGACTGGGGTGGTGTTTGAGCCGTTTGAAGAGGTCAAGAGCGATGCTTTTGTTGTTCCTGTGTCCCCTCTGCTATCTCTTGCTCGTCAGCGTTACGCAGATGACTCTGAAGCTGCAATCAACGAGCAGATCAATGTGGAATACAATGTGTCTTATGTGTACCATGCCCTGTTTGCATACTTTGACAGAGACAATATTGCTCTC…	MSLRLISTFSIPNKQGDGAMSSLLLCSKAGSSSSDLSRAFSLSFREQRKLNKFAVSASTETKTATLTGVVFEPFEEVKSDAFVVPVSPLLSLARQRYADDSEAAINEQINVEYNVSYVYHALFAYFDRDNIALKGLAKFFKESSEEEREHAEKFMTYQNKRGGRVKLHSIIEPPSEFDHAEKGDALYAMELALSLEKLTNEKLLNLHKVAEHNNDAQLTDFVETEFLAEQVEAIKKIADYVTQLRRVGKGHGVWHFDQTLLHEGA	955.965	AT5G01600.1	6e-117	ATFER1, FER1	ferretin 1			ferritin-4, chloroplastic
LOC18773616	PRUPE_6G182600	ATGGCAAAAATGACATCCCCCAGCAACACTCTCTTCTTCTCCCTCCTTCTCTCCCTCTTCCTCACCCTCGCTTTCTCCGACGACCCGGATTGCGTGTACACGGTCTACGTTAGGACCGGGTCGATCTTAAAGGGCGGGACGGACTCCAACGCCAACGTCCGGCTCTACGACGCGTATGGCTACGGGATCGAGATCCGGAACCTCGAGACCTGGGGCGGGTTGATGGGCCCCGGTCACAACTACTTCGAGAGGGGCAATTTGGACATTTTTAGCGGCCGCGGACCCTGCCTCCAAGCCCCCATCTGCGCCCTGAACCTCACCTCCGACGGATCCGGGCCCCACCACGGCTGGTACATCAACTACGTCGAGGTCACCTCCACTGGGGCCCACATTCCTTGC…	MAKMTSPSNTLFFSLLLSLFLTLAFSDDPDCVYTVYVRTGSILKGGTDSNANVRLYDAYGYGIEIRNLETWGGLMGPGHNYFERGNLDIFSGRGPCLQAPICALNLTSDGSGPHHGWYINYVEVTSTGAHIPCSQQLFTIEQWLATDTSPYELTAVRNYCNSDDDGVQKRRHTHRMIRSGSSDLVSAV	1473.12	AT2G22170.1	9e-72		Lipase/lipooxygenase, PLAT/LH2 family protein			PLAT domain-containing protein 3
LOC18773695	PRUPE_6G152700	ATGGAATTTGAATGCCAGGTGAGTACTGAGGTTTCTAAGAATTTGGTAGATTGTGTAGACAATTCGTTTGGACAACAAGGGGAACCAAATCAATTCAATTCCAAGCTGGAAGCTGAAAACCTTGGCATTTCAGAACAAACATCAGATTCATATACTGAAAAGGAAAAAATTGCACTCTCGAAACCTACATTGATCAAGAAACCAAACTCGGACTCTTGTGGTTCAAAACAGTTTTTGTCTAGTGATGTTGTTCTTAATTCTCGTAGGTCAATCACTGACCTTCCACCAGCCTTGTTATCCGAAATTCTGAATTTCCTTGACCCAAAAGAGCTAGGTATGGTTTCATGTGTATCAACGTATCTCTGTAGGCTTGCGTCTGAACACCATGTTTGGAAGGAT…	MEFECQVSTEVSKNLVDCVDNSFGQQGEPNQFNSKLEAENLGISEQTSDSYTEKEKIALSKPTLIKKPNSDSCGSKQFLSSDVVLNSRRSITDLPPALLSEILNFLDPKELGMVSCVSTYLCRLASEHHVWKDFYCERWGNSTVPTSLGSGVSDEMSWKEFFVEREFRSKTFMGRYSIDVMYGHNEAVLTVFLLASAKLIFTAGYDQTVKMWNMEEGLLIASSRSLGCTIRAVAGDTKLLVAGGTDGFIQCWRAVEGFPHLFDIKGPQNQNTEFRLWEHEGPITSLALDLTRIYSGSWDMTVRVWDRLSLKCVKVLRHSDWVWALVPHDLTVASTSGSDVCIWDTSSGRLMTIIHSAHVGNTYSLARNHTGDFLFTGGEDGAIHMYEITSQGLETNALF…	216.843	AT5G21040.2	0	FBX2	F-box protein 2			F-box/WD-40 repeat-containing protein At5g21040
LOC18773699	PRUPE_6G039600	ATGGCGTCAAAACGCATCTTGAAGGAGCTTAAGGATTTGCAGAAAGACCCTCCTACCTCATGCAGTGCTGGTCCCGTGGCCGAGGACATGTTCCATTGGCAAGCAACAATTATGGGGCCTGCTGACAGCCCATATGCAGGTGGTGTTTTTCTAGTTTCAATTCATTTCCCTCCAGATTATCCATTCAAGCCTCCAAAGGTTGCATTTAGGACCAAGGTATTCCACCCAAACATTAATAGTAACGGAAGTATATGTCTTGATATTCTTAAAGAACAATGGAGTCCGGCACTTACCATTTCCAAGGTGCTGTTATCCATATGCTCTCTGTTGACGGACCCCAACCCCGATGATCCACTTGTCCCTGAAATTGCACACATGTACAAGACTGATAGGGCAAAG…	MASKRILKELKDLQKDPPTSCSAGPVAEDMFHWQATIMGPADSPYAGGVFLVSIHFPPDYPFKPPKVAFRTKVFHPNINSNGSICLDILKEQWSPALTISKVLLSICSLLTDPNPDDPLVPEIAHMYKTDRAKYEATARSWTQKYAMG	276.113	AT5G41700.5	2e-106	UBC8	ubiquitin conjugating enzyme 8			ubiquitin-conjugating enzyme E2-17 kDa
LOC18773722	PRUPE_6G103900	ATGGGGTTGATTTCCCAAGCTGTTTATGATGGTGGTAGACATGTCATTGGAGTTATCCCCAAGACACTCATGCCTAGAGAGATAACTGGAGAAACAGTGGGGGAAGTGAAGGCAGTAGCAGACATGCACCAAAGGAAGGCAGAGATGGCTAAGCACTCAGATGCCTTTATTGCCTTACCTGGTGGCTATGGGACTCTTGAAGAACTTCTTGAAGTGATCACATGGGCCCAGCTGGGAATCCATGATAAACCTGTGGGATTGTTGAATGTGGACGGGTTTTATAACTCATTGTTGTCGTTTATTGACAAGGCTGTTGAAGAAGGTTTCATTAGTCCAACTGCACGACACATAATCGTTTCTGCCCCTACTGCTAAGGAGCTAGTGAAGAAAATGGAGGAA…	MGLISQAVYDGGRHVIGVIPKTLMPREITGETVGEVKAVADMHQRKAEMAKHSDAFIALPGGYGTLEELLEVITWAQLGIHDKPVGLLNVDGFYNSLLSFIDKAVEEGFISPTARHIIVSAPTAKELVKKMEEYFPRHERVASKLSWEIEQLSYPTICDISR	424.262	AT2G28305.1	1e-104	LOG1, ATLOG1	Putative lysine decarboxylase family protein			cytokinin riboside 5'-monophosphate phosphoribohydrolase LOG1
LOC18773732	PRUPE_6G118700	ATGGAATTTTGGGGTGTTGAAGTGAAGGCTGGAGAGCCAGTAAAATATGTGCCTGTTGATGGCAAAGTTGTGCACCTGTCACAGGCTTGTTTGGGCGAGACAAAGAAGGGAGCTGATCAAGGTGTCATCTCTGTGAAGATCGATGACAAGAAGTTTGTTTTGGGAACTCTTTCATCTGATAAATTCCCTCAATTGTTCCTTGACTTGGTTTTTGAGAAAGAGTTTGAGCTCTCGCACAACTTGAAAAGTGGAAGTGTCCACTTTTGTGGTTATCAGACTTTGATTGGAGAGGACGAGGAGGGTGATTCGGAATTTGATTCCTCAGATGAGGATGTCCCGATGGAAATCACACAGAATGGAATGCCAGCTCCTTCCAAGACTAACACTGTGAAACCTGAA…	MEFWGVEVKAGEPVKYVPVDGKVVHLSQACLGETKKGADQGVISVKIDDKKFVLGTLSSDKFPQLFLDLVFEKEFELSHNLKSGSVHFCGYQTLIGEDEEGDSEFDSSDEDVPMEITQNGMPAPSKTNTVKPEASEKQKVKIEEPSNDDDDDSDDSSSEDGLGGFEDSSDEDDDSDEDDDATDEDDEETPTPKKASKKRPNESASKTPVPAKKAKQVTPQKTDGKKAAHTATPHPAKKGGKTPATGDKAKPQTPKSVGEHSCKPCSKSFNSDGALQSHNKAKHSAK	868.375	AT5G03740.1	2e-44	HD2C, HDT3	histone deacetylase 2C			histone deacetylase HDT1
LOC18773737	PRUPE_6G077800	ATGTCTTGCGGCAACGGTAATTGCAGCTGTGGCTCAAACTGCTCCTGCGGCAGTAGCTGCAATTGTGCCTACCCTGACTTGAGTTACTCAGAGACCACTTCTACTGAGACCATCATTGCTGGGGTTGCACCTGTGAAGATGTACTATGAGGGTTCTGAGATGAGCTATGGAGCAGAGAATGACTGCAAGTGTGGAGCAAACTGCAGCTGCAGCTCATGTGGCTGCCACAAATGA	MSCGNGNCSCGSNCSCGSSCNCAYPDLSYSETTSTETIIAGVAPVKMYYEGSEMSYGAENDCKCGANCSCSSCGCHK	620.2	AT5G02380.1	5e-09	MT2B	metallothionein 2B			metallothionein-like protein type 2
LOC18773751	PRUPE_6G129700	ATGAGTAAACTTCAGAGTGATACTCTCAGAGAGGGTATTTCCACCATCATGGCTGCGTCCAAGGAAAAAAACCGCAAGTTCACTGAGACCATCGAACTTCAGATTGGGCTGAAAAATTATGATCCCCAAAAAGACAAACGTTTCAGTGGTTCTGTTAGGTTGCCACACATCCCTCGTCCAAAGATGAAGGTTTGCATGCTTGGAGATGCTCAGCATGTTGAAGAGGCTGAGAAGATAGGGTTGGATTATATGGATGTTGAAGGGCTGAAGAAGCTAAACAAGAACAAGAAATTGGTTAAGAAACTGGCCAAGAAATACCATGCCTTTTTGGCATCAGAAGCTGTTATTAAGCAGATTCCCCGTCTTTTGGGTCCTGGTCTCAACAAGGCAGGAAAATTT…	MSKLQSDTLREGISTIMAASKEKNRKFTETIELQIGLKNYDPQKDKRFSGSVRLPHIPRPKMKVCMLGDAQHVEEAEKIGLDYMDVEGLKKLNKNKKLVKKLAKKYHAFLASEAVIKQIPRLLGPGLNKAGKFPTLVTHQESLESKVAETKATIKFQLKKVLCMGVAVGNASMEEKQIFQNVQLSVNFLVSLLKKNWQNVKCLNLKTTMGKPYRIY	522.039	AT1G08360.1	1e-122		Ribosomal protein L1p/L10e family			60S ribosomal protein L10a
LOC18773762	PRUPE_6G023300	ATGGAGCATGAGGAGACTGGCTGTCAACCTCACCCCGAGGGTCCTATATTGTGTGTAAACAATTGTGGGTTTTTTGGAAGTGTGGCTACTAGGAATATGTGTTCCAAGTGCCATAAGGACATGATGTTGAAAGAGGAGCAGGCAAAGCTCGCTGCATCATCCTTTGGAAACATTGTCAATGGAACATCAAACAGCAATGGAAATGAACCTGTTGTTGCTGCTGGTGTGGATGTTCAAGCCCATCTGGTGGAGCCAAAAACTCTCTCTTTACAACCATCCTTTTCCTTTGGTTCAGGTTCGGGGGGGAGTGGTGAGGCAAAGCCAGAAGGCCCAAAACGTTGCGGAACTTGCAACAAGAGGGTTGGATTAACAGGGTTCAATTGTCGGTGTGGTCACCTT…	MEHEETGCQPHPEGPILCVNNCGFFGSVATRNMCSKCHKDMMLKEEQAKLAASSFGNIVNGTSNSNGNEPVVAAGVDVQAHLVEPKTLSLQPSFSFGSGSGGSGEAKPEGPKRCGTCNKRVGLTGFNCRCGHLFCAVHRYSDKHDCPYDYHTAARDVIAKANPVVKADKLEKI	659.139	AT1G51200.4	1e-58		A20/AN1-like zinc finger family protein			zinc finger A20 and AN1 domain-containing stress-associated protein 8
LOC18773772	PRUPE_6G171700	ATGGCGGCAAAAGCTAGACTTCCCAGAAAGACTCGAAACCCAGATCTGATTCGTGGGGTGGGCAAGTTCTCCAGGTCCAAGATGTACCACAAGCGCGGCCTTTGGGCCATCAAGGCCAAAAACGGCGGCGTTTTTCCCCGCCATGACCCGAAGCCAACGGCTGAGACCGGGCCGGAAAAGGTCCCCAAGTTCTACCCTGCCGATGACGTCAAGAAGCCGCTCGTCAACAAGCGCAAGCTCAAGCCTACCAAGCTCAGGGCTAGTGTTACACCAGGTACGGTGTTGATTATATTGGCGGGAAGGTTTAAGGGCAAGAGAGTTGTTTTTCTTAAGCAGCTTCCATCTGGGTTGCTTCTCGTTACTGGGCCATTCAAAATTAATGGTGTTCCTTTGAGACGC…	MAAKARLPRKTRNPDLIRGVGKFSRSKMYHKRGLWAIKAKNGGVFPRHDPKPTAETGPEKVPKFYPADDVKKPLVNKRKLKPTKLRASVTPGTVLIILAGRFKGKRVVFLKQLPSGLLLVTGPFKINGVPLRRVNQSYVIATSTKVDISGVNVEKFDDKYFAKQVEKKKNKGGREFFEAEKEEKNVFPQEKKDDQKSVDASLIKSIDAVPDLKTYLAARFSLKSGMKPHELVF	231.863	AT1G74050.1	4e-118		Ribosomal protein L6 family protein			60S ribosomal protein L6
LOC18773852	PRUPE_6G152000	ATGGGCAGAGCCATCATGTTGTTGATGATGATGACTACGACGACAATGCTACATGCCGTTTTGGGGCAGGAGGCCCCGGCTCCGGCTCCGGGGCCGGCGTCGCCGGATTGCCAAACGGCCGTTCTGGGGCTGGCGGATTGCCTGTCGTATGTGATGCCAGGCAGCAATTTGACAAAGCCGGACAAGCCGTGCTGCCCTGAGCTGGCGGAGCTAGTGAAAGACAACCCAATCTGCTTGTGCAGTTTGCTGGCCAACAGCAACAGCAGCAACAGCGTCGGCCTTGAAATTGATGTCAACAGGGCTCTTAAGCTTCCCACTGTTTGCAAGGTTTCGACGCCCCCTCCTAGCACCTGCGAACTTCTTGGAATTCCAGTGGGAGCTCCCACAGCTTCTGAAGCG…	MGRAIMLLMMMTTTTMLHAVLGQEAPAPAPGPASPDCQTAVLGLADCLSYVMPGSNLTKPDKPCCPELAELVKDNPICLCSLLANSNSSNSVGLEIDVNRALKLPTVCKVSTPPPSTCELLGIPVGAPTASEAPANSPGLTPQGPSAATSPKSGASKTANSVMAFLAGLVIAVLPIW	237.364	AT3G43720.1	1e-27		Bifunctional inhibitor/lipid-transfer protein/seed storage 2S albumin superfamily protein			non-specific lipid transfer protein GPI-anchored 2
LOC18773882	PRUPE_6G123800	ATGAAGGTGGTCGCTGCATATTTGCTCGCTGTTTTGGGAGGCAAGACCAGCCCCTCAGCTGCTGATTTGAAGGACATTCTCGGATCAGTTGGAGCTGAGGCCGATGGTGACAGGATTGAGTTGCTGTTGTCTGAAGTCAAGGGCAAAGATATTACAGAAGTAATTGCTTCCGGAAGGGAGAAGTTGGCATCTGTTCCATCTGGTGGTGGTGCAGTTGCTTATTCAGCACCTGCAGCTGATGCTGGTGCTGCAGCTCCTGCCGCTGCTGAGCAGAAGAAGGAAGAGAAGGTCGAAGAGAAGGAAGACACAGATGATGATATGGGATTCAGCCTTTTCGACTAA	MKVVAAYLLAVLGGKTSPSAADLKDILGSVGAEADGDRIELLLSEVKGKDITEVIASGREKLASVPSGGGAVAYSAPAADAGAAAPAAAEQKKEEKVEEKEDTDDDMGFSLFD	318.735	AT3G44590.1	3e-31		60S acidic ribosomal protein family			60S acidic ribosomal protein P2B
LOC18773913	PRUPE_6G255100	ATGTCGTCGTGCTGTGGAGGCAAATGTGGTTGCGGGGCTGGCTGCAAGTGCGGCAGCGGCTGTGGAGGGTGCGGGATGTACCCTGATATTTCCATGGAACAGAGCACCACAACTGAGACCCTTATAATGGGGGTTGCACCTCAAACCTCTCATTTTGAGGCTTCTGAGATGGGTGTTGTTGCTGAGAATGGATGCAAGTGTGGAGACAACTGCACCTGCAACCCCTGCAAGTGTGGAAAGTGA	MSSCCGGKCGCGAGCKCGSGCGGCGMYPDISMEQSTTTETLIMGVAPQTSHFEASEMGVVAENGCKCGDNCTCNPCKCGK	20356	AT3G09390.1	2e-08	MT2A, ATMT-K, ATMT-1	metallothionein 2A			metallothionein-like protein type 2
LOC18773996	PRUPE_6G008800	ATGTCAATCGTCCCAATCAACGAGCAACGAGGCAGTGACTTCGACCCTTCCTTGGCTCTTGACCTGTGGGACCCATTCACAGATTTCCCTTTCCCATTCCCTTCCTCACTCTCCAACGTTTTCCGGGAATTCAATCTGGGTTCTTCGGTAAACTCAAGACTAGATTGGAGAGAGACCCGACATGCCCACATCCTAAAGGCGGCTCTTCCTGCGTTCATGAACGAGGACGTGCTTGTGGAGCTTCAAGACGAGCGTGTGCTTCAGATCAGTACAGACAGCGGTAGCTTCATGACAAAGTTTAAGCTTCCGGACAACGCCAAGATTGAGCAGCTTAAGGCCTTCATGAGCAATGGGGTTCTCACTGTCACTGTTCCTAAGGAGGAGCCCAGCAGACCCAAT…	MSIVPINEQRGSDFDPSLALDLWDPFTDFPFPFPSSLSNVFREFNLGSSVNSRLDWRETRHAHILKAALPAFMNEDVLVELQDERVLQISTDSGSFMTKFKLPDNAKIEQLKAFMSNGVLTVTVPKEEPSRPNIRAIEISGED	242.34	AT1G07400.1	6e-33		HSP20-like chaperones superfamily protein			18.5 kDa class I heat shock protein
LOC18774031	PRUPE_6G274500	ATGGCGTCACTGATACTCGGAGCTCTTCCAATCCCCACTCAAACGCTCACTTTCAGCTCTCGCATTTCGTTTTCTCAGTCTGAAACCGTATCCATTTCTCTCCCCTCCTCCACAGCTTCGCTCTCAGTCTCCACAGCTACCACTCCATTAGTCCCTTCAGTGTATTGCGGTAGGGGCGATAAGAAAACCGAAAGAGGAAAGCGTTTCAATCACTCTTATGGCAATGCTAGGCCTCGGAACAAGAACAAGGGAAGAGGTCCACCTAGGGTTCCGGTGCCTGTGGCTCCCCCTAAGAAAGATAAGTTTGAAGACGATACAGTTGTCAAGGTTGAAATTGATGAGTCTCTGTCTTAG	MASLILGALPIPTQTLTFSSRISFSQSETVSISLPSSTASLSVSTATTPLVPSVYCGRGDKKTERGKRFNHSYGNARPRNKNKGRGPPRVPVPVAPPKKDKFEDDTVVKVEIDESLS	386.902	AT2G38140.1	2e-30	PSRP4	plastid-specific ribosomal protein 4			30S ribosomal protein S31, chloroplastic
LOC18774102	PRUPE_6G265200	ATGGGAAAGGATAGGAAGATTGGCGTTGCCATGGACTTCTCAAAGAGCAGCAAGAACGCGCTGGAATGGGCTGTGGACAATTTGCTTGACAAGGGTGACACCCTTTACATCATCCACATCAACCCCAACTCGCTCGACGAGTCTCGTACCCAACTCTGGGCCCAATCTGGTTCTCCTCTGATTCCATTGACAGAGTTCAGAGAGCCCGAGATCATGAAGAAGTATGATGTGCGAACTGATATTGAAGTTCTTGATACACTTGACACTGCTTCCAGGCAGAAAGAGGTGAACATTGTGACAAAACTGTACTGGGGAGATGCAAGGGAGAAGCTTCTTCAAGCGATTGAAGATCTGAAGCTGGACTCTTTGGTCATGGGAAGCAGAGGCCTTGGTACCATC…	MGKDRKIGVAMDFSKSSKNALEWAVDNLLDKGDTLYIIHINPNSLDESRTQLWAQSGSPLIPLTEFREPEIMKKYDVRTDIEVLDTLDTASRQKEVNIVTKLYWGDAREKLLQAIEDLKLDSLVMGSRGLGTIKRILLGSVSNYVLTNAPIPVTIVKDPSLQHH	1624.53	AT3G53990.1	1e-81		Adenine nucleotide alpha hydrolases-like superfamily protein			universal stress protein PHOS32
LOC18774107	PRUPE_6G079000	ATGGCTCAACAGGAGGAAGGCTGGCCTCTGGGTTTGCAGCCAATGCATGTGAGAGTTGGGTTGGCTCAAAACAATGAGTTTTCCGGTTCAGTGTCATTCAACACTTTACTCACTGGTTCTCCAACTTCCTCTACAGATTCCTCTTCAGATCTAGACACAGAGTCCACAGGGTCTTTTTTCCATGACAGGAGCATTACACTGGGGAGCCTTATTGGAATCAATAACATTCTAGAGCTATCAAGAAGATCACTGAGGGGAAGAAAAACTGATCAGGTCTGTAAAGACAGGAAGAGCAACAACTCCACCAAGTTCAGATTGTGTTTTTTCTCTCTATGTTCCAGGGACAGTACAGATGGTGAGAATGTGAACAAAAACAACCATCCTCCATCTCTTGGTCAC…	MAQQEEGWPLGLQPMHVRVGLAQNNEFSGSVSFNTLLTGSPTSSTDSSSDLDTESTGSFFHDRSITLGSLIGINNILELSRRSLRGRKTDQVCKDRKSNNSTKFRLCFFSLCSRDSTDGENVNKNNHPPSLGHFLAVERRAANENYRENPPIYGPDDEVALADHQPATQPNSLFVDGQVAPPQSSPWLGSDHVDQRKPVLFSCMCGGQLSQ	411.49	AT5G02440.1	2e-24		unknown protein; Has 71 Blast hits to 71 proteins in 12 species: Archae - 0; Bacteria - 0; Metazoa - 0; Fungi - 0; Plants - 71; Viruses - 0; Other Eukaryotes - 0 (source: NCBI BLink).			uncharacterized protein At3g17950
LOC18774121	PRUPE_6G303600	ATGGGCACAGCAACTTTCGTTGACATCATCATAGCCATCCTCTTGCCTCCTCTTGGTGTCTTCCTCAAGTTTGGCTGCGAAGCGGAATTTTGGATCTGTTTGATTTTGACTCTTTTTGGTTATCTCCCTGGTATTATCTATGCCATCTACATCCTCACCAAGTGA	MGTATFVDIIIAILLPPLGVFLKFGCEAEFWICLILTLFGYLPGIIYAIYILTK	487.311	AT3G05880.1	8e-27	RCI2A	Low temperature and salt responsive protein family			hydrophobic protein RCI2B
LOC18774128	PRUPE_6G365100	ATGGCTCTGAGTCTCAATTCCATGATGACCTTCCCATCTCACAACCTCCCTTCTAAGTCCCACAATCTCAGATCTCCAAAAATCTTCATGGCCTCCACTCTTCACTCCTCCCCTAAAGAGACCGAGAATCTGAAGAAGTCTTATTGCCCTCCACGTGAGACACATGTTCAAGTGACTCATTCAATGCCTCCTGAACAGATTGAGATCTTCACATCATTAGAAGGTTGGGCTGAGAATAACATCTTGGTGCACCTAAAGCCTGTTGAGAAGTGCTGGCAACCACAAGATTTTCTTCCACTCCCTGAGTCAGATGGATTCTATGAGCAAGTTAAGGAGCTGAGGGAAAGAGCAAAGGAAATTCCTGATGATTATTTTGTTGTGTTGGTTGGAGATATGATC…	MALSLNSMMTFPSHNLPSKSHNLRSPKIFMASTLHSSPKETENLKKSYCPPRETHVQVTHSMPPEQIEIFTSLEGWAENNILVHLKPVEKCWQPQDFLPLPESDGFYEQVKELRERAKEIPDDYFVVLVGDMITEEALPTYQTMLNTLDGVRDETGASLTSWAVWTRAWTAEENRHGDLLHKYLYLSGRVDMRQIEKTIQYLIGSGMDPKTENNPYLGFIYTSFQERATFVSHGNTARQAKEHGDLKLAQICGTIASDEKRHETAYTKIVEKLFEIDPDGTVLALADMMKKKISMPAHLMYDGQDDNLFEHFSAVAQRLEVYTARDYADILEFLVGRWNIEKLTGLSGEGRRAQDFVCGLPPRIRRLEERAQGRAKQATTVPFSWIFGREIKV	213.111	AT3G02630.1	0		Plant stearoyl-acyl-carrier-protein desaturase family protein			stearoyl-[acyl-carrier-protein] 9-desaturase, chloroplastic
LOC18774130	PRUPE_6G250700	ATGGCCAACGCAGCATCTGGTATGGCTGTGCATGATGATTGCAAATTGAAGTTTTTGGAGCTTAAGGCCAAGAGGACCTACCGCTCAATTGTTTTCAAGATTGAGGAGAAGCAAAAGCAAGTTGTGGTGGAATCTGTTGGTGAACCAACAGAGACCTATGAGCAGTTCGCAGGAAAACTTCCCGCTGATGAATGCCGTTATGCTGTTTTTGATTTTGATTTCCTTACACCAGAAGGTGTACAGAAGAGCCGCATATTCTTCATTGCATGGTCTCCTGATACATCGAGGGTGAGAAGCAAGATGATCTATGCAAGCTCGAAAGACAGATTTAAGAGAGAGCTTGATGGAATCCAGATTGAGTTGCAAGCGACTGATCCGACTGAGATTGGTCTTGATGTC…	MANAASGMAVHDDCKLKFLELKAKRTYRSIVFKIEEKQKQVVVESVGEPTETYEQFAGKLPADECRYAVFDFDFLTPEGVQKSRIFFIAWSPDTSRVRSKMIYASSKDRFKRELDGIQIELQATDPTEIGLDVIKSRAS	3877.15	AT3G46010.1	9e-82	ADF1, atadf, ATADF1	actin depolymerizing factor 1			actin-depolymerizing factor 2
LOC18774140	PRUPE_6G051600	ATGGATTCAGCTTCAGGGGGAACCGGACCACCCGACCCGAATACCAGCGGAGGAGAGGGCCCATCATCGGCAGCAACCGGGTCGATAGCCGCGGCTGCTGGTGGTGCCGTTGTTCCAGCAGCAGCAGCCGAGGCCTCATCGTCTCCAGCCCCGCCGAGCCGCTACGAGTCGCAGAAGCGGCGGGACTGGAACACCTTCCTGCAGTACCTCAAGAACCACAAGCCGCCGCTGACGCTGGCACGGTGCAGTGGGGCCCACGTGATCGAGTTCCTCAAGTACCTCGACCAGTTCGGGAAGACCAAGGTCCACGCCGCCGGCTGCCCCTACTTCGGGCACCCCAACCCCCCTGCCCCGTGCGCCTGCCCGCTCAAGCAGGCCTGGGGCAGCCTCGACGCGCTC…	MDSASGGTGPPDPNTSGGEGPSSAATGSIAAAAGGAVVPAAAAEASSSPAPPSRYESQKRRDWNTFLQYLKNHKPPLTLARCSGAHVIEFLKYLDQFGKTKVHAAGCPYFGHPNPPAPCACPLKQAWGSLDALIGRLRAAYEENGGRPESNPFGARAVRIYLREVREGQAKARGIPYEKKKRKRPTVTATAVVGNVSAGPSQGGGDGDVGGGDGGGGSSTTAADAATTSTAV	228.994	AT1G07090.1	5e-96	LSH6	Protein of unknown function (DUF640)			protein LIGHT-DEPENDENT SHORT HYPOCOTYLS 5
LOC18774215	PRUPE_6G057500	ATGGTTCGAGACCGAAACCAACCCAATTCCACTCACCGAGTGCTAGTCTCCGGCAACTATTGCCACGACGTTCTCATCAAGGACGGCGTCGTTTTGGCCGAGACTCTCGGCGGGGCAGCCTCTTTCATCTCCAACGTCTTCGATGGCCTCTCCGTTCCCTACAATCTGGTCTCCAAAGTCGGCTCCGACTTCGCTTACTCGGTTCCTCGTGACCCCATTGTTGTACCCAATTGCAAAACCACTCTGTTCCACGCGCATTTCGATTCGGGCGTCGACGGCGACGGCCGCCAGGACCGGGTTCTGAAACGGGTCAGCTCCTGCGACCCGATTAAGCCCTCGGATCTCCCCGAATCCAGGTTTGATTTCGGAATGGCGGTCGGGGTCGGAGGGGAGGTCACG…	MVRDRNQPNSTHRVLVSGNYCHDVLIKDGVVLAETLGGAASFISNVFDGLSVPYNLVSKVGSDFAYSVPRDPIVVPNCKTTLFHAHFDSGVDGDGRQDRVLKRVSSCDPIKPSDLPESRFDFGMAVGVGGEVTVETMEKLLEICNTVFVDIQALIRAFDGVNGTVKHVALKESGFFHLLPRMGFLKASAEEALFMEVEEVRKLCCVVVTNGRRGCRVYWRDGEVEVGPFPTNQVDPTGAGDSFLGGFVAGLVNGLTVPDAALLGNLFGSLTVGQIGLPKFDFRLLQRAREEVQRRKMQCVNCYERKDDKFRFVNAAGHEQFHASLGVAKQTTKCLAHEPQWDLPSSPPKSTEQVVLCQYTTQSKSLTGSVYEEAIKTVDVESKP	232.103	AT5G58730.1	2e-144		pfkB-like carbohydrate kinase family protein			inositol 3-kinase
LOC18774218	PRUPE_6G009900	ATGAGCAACTCAAAGAAGCTGAGTGTGGCGCTCTCAAGCATCTTGGTGCTGATGTTGCTAGTTGATTTTGGCAGCTCAAACATAGACCAAGATAGGGCGGAATGTGCAGAACAACTAGTAGGGCTTGCCCCATGCCTTCCTTATGTAGGTGGTGATGCCAAAGCTCCCACACTAGACTGTTGCACTGGGATTAAAGAAGTGGAGCAGAAGAGCAAGAAATGCCTCTGTGTCCTAATTAAGGACCGCAACGATCCGAATCTTGGCCTCAAGATCAATGCCACTCTTGCATTACAACTTCCTACTTCTTGTCATGTCCCTGTTAACATATCTAGATGTGTTGATCTCTTGAATTTGCCATCAAACTCTCCGGACGCTAAGATGTTCAGGGAATATGCAAAC…	MSNSKKLSVALSSILVLMLLVDFGSSNIDQDRAECAEQLVGLAPCLPYVGGDAKAPTLDCCTGIKEVEQKSKKCLCVLIKDRNDPNLGLKINATLALQLPTSCHVPVNISRCVDLLNLPSNSPDAKMFREYANKTAASSTVPIASGNSTSNGTVAQAKSDGVSLEKRVLGVEMLLGSLALMWFYT	303.236	AT1G55260.1	6e-48		Bifunctional inhibitor/lipid-transfer protein/seed storage 2S albumin superfamily protein			protein YLS3
LOC18774239	PRUPE_6G153600	ATGAACAATTTCAGCGCTGAAGATCTGTCAACCATCGGAGGAATCGCAACGGTGTCGCTTCTGCATTCCTTCATACCCACGCATTGGCTCCCCTTCTCCATCGTAGGCCGAGCCCAGAAATGGACTCTCTCCCGCACACTCTTCGTCACTGCATTTGGAGCAGTCTTGCATGTAATATCCACTTCAATACTCGGTATAACAGCAGTCACCATGGCAAATACCATAGCCGGCGAGGAAACAGTACATAAACTTGCTTCACTTCTGCTCGTAGTTCTTGGTGGCGGTTACATTTTGTTGTTCTTAACTGGAAAAGGCGGTCACAGTCATTCACACAACCAACCCATGGAAAAGATGGCTGTTGCAGGACTTGTACTCGTTCCTGCATTGTCTCCTTGTGCA…	MNNFSAEDLSTIGGIATVSLLHSFIPTHWLPFSIVGRAQKWTLSRTLFVTAFGAVLHVISTSILGITAVTMANTIAGEETVHKLASLLLVVLGGGYILLFLTGKGGHSHSHNQPMEKMAVAGLVLVPALSPCATTLPVFLAVGNSSSMMVLAIIVLLFSTITVMTSLVALSFYGASQLKFHWVERYDKLLVGSVLCLVGMLTLVFHDHDGEGGTTGEHLHRKIIAL	216.268	AT5G21070.1	5e-142		unknown protein; Has 115 Blast hits to 115 proteins in 34 species: Archae - 1; Bacteria - 36; Metazoa - 0; Fungi - 0; Plants - 60; Viruses - 0; Other Eukaryotes - 18 (source: NCBI BLink).			uncharacterized
LOC18774244	PRUPE_6G237200	ATGGCATCCAACAGGGGTCAAGGTGGAATTCAGCAACTGTTGGCTGCAGAACAAGAAGCTCAACACATTGTCAATGCTGCCAGAAGTGCAAAAATGGCTAGATTGAAACAAGCTAAAGATGAGGCTGCAAAGGAGATTGCTGAATACCGTGCCCAAATGGAGCTTGAGTTCCAGAAGAAAGTTGCAGCGAGCAGTGGAGATTCAGGGGCTAATGTGAAGCGTCTGGAACTTGAAACCGAGCAGAAGATCAAGCACCTCTCGGCAGAGGCCGCAAGGATTTCTAGTGATGTTGTGCAAATGCTTCTGAAGCAGGTGACGACGGTGAAGAATTAA	MASNRGQGGIQQLLAAEQEAQHIVNAARSAKMARLKQAKDEAAKEIAEYRAQMELEFQKKVAASSGDSGANVKRLELETEQKIKHLSAEAARISSDVVQMLLKQVTTVKN	275.634	AT3G01390.2	2e-45	VMA10, AVMA10	vacuolar membrane ATPase 10			V-type proton ATPase subunit G
LOC18774247	PRUPE_6G080700	ATGGCGGCGTCCCAGGCGAGCCTTCTGCTTCAGAAACAGCTCAAGGATCTTTGCAAGAACCCAGTAGACGGGTTCTCGGCCGGTCTGGTCGATGAAAACAATATCTTTGAGTGGAGCGTCACGATTATCGGACCGCCGGATACACTATATGAAGGGGGATTCTTCAATGCCATCATGAGCTTTCCTAATAATTATCCGAACAGCCCTCCGACGGTTAAGTTTACTTCAGATATATGGCATCCCAACGTCTATCCTGATGGCCGTGTTTGCATATCAATTCTTCATCCTCCTGGTGAGGATCCAAATGGTTATGAGCTTGCAAGTGAGCGCTGGACGCCTGTCCATACGGTTGAAAGCATAGTTTTGAGTATAATATCAATGCTATCCAGTCCGAATGAC…	MAASQASLLLQKQLKDLCKNPVDGFSAGLVDENNIFEWSVTIIGPPDTLYEGGFFNAIMSFPNNYPNSPPTVKFTSDIWHPNVYPDGRVCISILHPPGEDPNGYELASERWTPVHTVESIVLSIISMLSSPNDESPANVEAAKEWRDRRDDFKKKVSRCVRKSQEML	1154.53	AT5G59300.1	1e-103	UBC7, ATUBC7	ubiquitin carrier protein 7			ubiquitin-conjugating enzyme E2 7
LOC18774284	PRUPE_6G221600	ATGAAGTACAATCCCCGCGTCACCAGCTCTAGGCGGAAGAACCGCAAGGCTCACTTCACCGCGCCGTCGAGCGTGAGGCGGGTGTTGATGAGCGCGCCCCTCTCCTCAGACCTCCGCGCCAAGCACAACGCCCGATCCATGCCGGTGCGCAAGGACGACGAGGTCCAGGTGGTGCGCGGGACCTACAAGGGTCGCGAAGGCAAGGTTGTCCAGGTGTATCGCCGAAAGTGGGTCATCCATATCGAGCGTATCACCAGAGAGAAGGTCAACGGTTCCACGGTCAACGTCGGCATCAACCCATCGAAGGTGGTCATCACCAAGCTCAGGATCGACAAGGACCGCAAGTCTCTGCTCGACCGCAAGGCCAAGGGTCGCGCCGCTGCGGACAAGGACAAGGGC…	MKYNPRVTSSRRKNRKAHFTAPSSVRRVLMSAPLSSDLRAKHNARSMPVRKDDEVQVVRGTYKGREGKVVQVYRRKWVIHIERITREKVNGSTVNVGINPSKVVITKLRIDKDRKSLLDRKAKGRAAADKDKGTKFTAEDIMQNVD	793.368	AT3G49910.1	4e-93		Translation protein SH3-like family protein			60S ribosomal protein L26-1
LOC18774290	PRUPE_6G255200	ATGGAGAGTGGTCTAGTTCTAGATAGTTCTGCAACTCCAGCAAAAGCCATGAACCCCAATTCAAGTTCTAAGGTCAGGGTCATTGTGAGGGTTCGTCCTTTTCTTCCCCACGAGATCGCTGCCAATAACGGAGATCAGACGCCGTGTGTTTCAGTAATTGAACAAGAATGTGAGTCTTCTACTGAGGAAGTGGTTGTTTATCTCAAAGATAAAGAATCAAGCCGAAACGAGTGTTACCGGTTGGACTCTTTCTTTGCCCAAGAGGACAACAATGTTGGTCGGATCTTCTACAGAGAAGTGAGCCCTTTGATTCCAGGACTCTTTCATGGCTGCAATGCTACGGTGTTTGCCTATGGAGCTACCGGCAGTGGAAAGACTTACACTATGCAGGGCACAGAT…	MESGLVLDSSATPAKAMNPNSSSKVRVIVRVRPFLPHEIAANNGDQTPCVSVIEQECESSTEEVVVYLKDKESSRNECYRLDSFFAQEDNNVGRIFYREVSPLIPGLFHGCNATVFAYGATGSGKTYTMQGTDEMPGLMPLAMSTIMSMCQCTGSTVEISYYEVYMDRCYDLLEIKAKEIAVLDDKDGQIHLRGLSRVPVKSMDEFYEAFSCGIQRRRIAHTGLNDVSSRSHGVLVIAVSTPWDDGSAAVTGKLNLIDLAGNEDNRRTCNEGIRLQESAKINQSLFALSNVIYALNNNLSRVPYRESKLTRILQDSLGGMSQALMVACLNPGEYPESVHTVSLAARSRHITNFVRSAKKQETPKVKVDMEAKLRAWLESRGKTKSAQRIQAFNSPLLGK…	421.668	AT5G02370.1	0		ATP binding microtubule motor family protein			kinesin-like protein KIN-10B
LOC18774292	PRUPE_6G264600	ATGGAGGGGAGAAAGCAAGTTGGGTCGTCTTCTTCGTTTACTTCTGAGCTTTTCGGGTCCAAGGAGTCGTCATCCTCATCTGGGATTTTCGGGGCTATATTTGCGCCTTCCTCCAAGGAACTGGTGTTAGGGAGGGAATCTCTGCGTTCTGAAGTCACTGGGAAAAAGCTTACGGATGAACCATTGCACGTCAAACCTGGAGAGCCAGTTGGTGACTCTAATGGCAGCGAAGGTGAGAGTCAGAACATGCCAAATAAGGACATGAGTTCCTTCTATCAGGATCAGAGAGTACAGCAACCATGTCACCTCAGCTCTTCAATCTATTATGGTGGCCAAGATATTTATTCTTACCCCCAGAGTACCCAGAGCCCTGGATTTAACTCTGTGTACAAGAAAGAT…	MEGRKQVGSSSSFTSELFGSKESSSSSGIFGAIFAPSSKELVLGRESLRSEVTGKKLTDEPLHVKPGEPVGDSNGSEGESQNMPNKDMSSFYQDQRVQQPCHLSSSIYYGGQDIYSYPQSTQSPGFNSVYKKDGTEDDSGSACRGNWWQGSLYY	949.363	AT5G02020.1	1e-35	SIS	Encodes a protein involved in salt tolerance, names SIS (Salt Induced Serine rich).			uncharacterized
LOC18774303	PRUPE_6G081300	ATGTCAGGACGAGGAAAGGGCGGTAAGGGTTTGGGCAAAGGGGGAGCCAAACGACATCGTAAGGTCCTCAGAGATAACATCCAGGGCATCACCAAGCCTGCGATTCGTCGTCTGGCTCGCAGAGGTGGTGTGAAGCGTATCAGTGGTCTGATCTACGAGGAGACCAGAGGCGTCCTCAAGATCTTTCTCGAGAATGTGATTCGTGATGCAGTGACTTACACTGAGCACGCCAGGAGGAAGACTGTGACCGCCATGGATGTGGTGTATGCTTTGAAGAGGCAGGGAAGGACCCTCTATGGTTTTGGGGGTTAG	MSGRGKGGKGLGKGGAKRHRKVLRDNIQGITKPAIRRLARRGGVKRISGLIYEETRGVLKIFLENVIRDAVTYTEHARRKTVTAMDVVYALKRQGRTLYGFGG	1137.07	AT5G59970.1	7e-67		Histone superfamily protein			histone H4
LOC18774312	PRUPE_6G001500	ATGGAGGAAGCAAGGTATTGGTGTCACGTGTGTTCTCAAATGGTGGATCCCATCATGGAAGTAGAAATGAAATGCCCATTTTGCCAAAGCGGATTTATTGAGGAAATGAATAGCAACACGAGGGACAGTCATGAAGCTGACTCTGATTTTGGATCAGATCGAGCCCTCTCCCTCTGGGCACCAATCTTGCTGGGAATGATGAACAATCCCCATCGACGCCGAAGATTAAGACGACTAGACTTTGATGAGGATGAGGATGATGATAATGATGATGGCGAGGCCCGCCATGGCGGAGACACTGAATTGGACAGGGAACTTGAATCAATCATCCGAAGGAGGAGGAGAAACTCGGCTACTATTCTACAGCTGCTTCAAGGCATTCGAGCTGGCTCGGCATCT…	MEEARYWCHVCSQMVDPIMEVEMKCPFCQSGFIEEMNSNTRDSHEADSDFGSDRALSLWAPILLGMMNNPHRRRRLRRLDFDEDEDDDNDDGEARHGGDTELDRELESIIRRRRRNSATILQLLQGIRAGSASESENSESDRDRDRDRDRERERERERERVILINPFSQTIIVQGSYDSNQGQNNNHTPMGSLGDYFIGPGLDLLLQHLAENDPNRYGTPPAQKEAVEALPTVTIKENLQCSVCLDDFEAGVEAKEMPCKHKFHSGCILPWLELHSSCPVCRFQLPADESKRDSDNSRNSSDQRESENIGGDGGGVEGDGDGRNGSGRRFSIPWPFNGLFSNSGSQSSGSGGNSSSAANATGSGSASRTDEN	445.119	AT5G56340.1	5e-133	ATCRT1	RING/U-box superfamily protein			E3 ubiquitin-protein ligase RDUF2
LOC18774331	PRUPE_6G057200	ATGGCTCGGACGACGTCGTTTTTGCTCTGCACCCTGGTCCTCTTTGGAACCCTAGCTCTCATCCAGGCAAAGAAGTCAAAGGAGGATCTGAAGGAAGTGACCCACAAAGTTTTCTTTGATGTTGAGATTGCTGGCAAGCCTGCTGGTCGGGTTGTAATCGGTCTCTTTGGGAAGACGGTTCCCAAGACTGCAGAAAATTTTCGAGCCCTTTGCACAGGGGAGAAGGGCATTGGAAAGAGTGGAAAACCTCTCCATTTCAAGGGTAGCAAATTTCATAGGATTATACCCAGTTTCATGATTCAGGGAGGTGATTTCACACTTGGTGATGGAAGAGGTGGAGAATCAATTTACGGAGAGAAGTTTGCTGATGAGAATTTCAAGCTGAAGCATACTGGCCCA…	MARTTSFLLCTLVLFGTLALIQAKKSKEDLKEVTHKVFFDVEIAGKPAGRVVIGLFGKTVPKTAENFRALCTGEKGIGKSGKPLHFKGSKFHRIIPSFMIQGGDFTLGDGRGGESIYGEKFADENFKLKHTGPGLLSMANAGSDTNGSQFFITTVTTNWLDGRHVVFGKVLSGMDVVYKIEAEGNQNGTPKSKVVIADSGELPL	2657.55	AT2G29960.1	3e-123	CYP5, ATCYP5, CYP19-4	cyclophilin 5			peptidyl-prolyl cis-trans isomerase CYP19-4
LOC18774333	PRUPE_6G336300	ATGCTTGTGTTGTTCGAAACTCCGGCAGGCTTTGCCTTATTTAAAGTGTTGAATGAAGGGAAGCTCTCCCAAGTTGAGGATCTATGGAAGGAATTTTCAAGTGCAGAGTCAGCTAGACAGGTTGTCAAACTGAAAGCTTTTTCCAAGTTTGAGAATACATCAGAAGCTTTGGAAGCAGCAACCCTGCTGATTGACAGTAAACCCAGCAAAGGTCTGCGCAAGTTCTTGCGTGCGCACTGCAGTGGCGAAACTCTGGCTGTTGCAGATTCTAAGCTTGGAAATGTCATCAAGGAAAAACTGAAAATAGACTGTGTTCACAACAATTCTGTTATGGAGTTGATGAGAGGTGTAAGAAATCAGTTGACTGAACTCATAGCTGGTCTACAAGTTCAAGATTTG…	MLVLFETPAGFALFKVLNEGKLSQVEDLWKEFSSAESARQVVKLKAFSKFENTSEALEAATLLIDSKPSKGLRKFLRAHCSGETLAVADSKLGNVIKEKLKIDCVHNNSVMELMRGVRNQLTELIAGLQVQDLAPMSLGLSHSLSRYKLKFSAEKVDTMVIQAIGLLDDLDKELNTYAMRVREWYGWHFPELAKIVQDNILYAKAVKLMGYRANAAKLDFSEILPEEVETELKEAAMISMGTEVSELDLINIKELCDQVLSLSEYRAQLYDYLKNRMNTIAPNLTALVGELVGARLIAHGGSLLNLAKQPGSTVQILGAEKALFRALKTKHATPKYGLIYHASLIGQAAPKLKGKISRSLAAKTALAIRYDALGDNQDNTMGLENRAKLEARLRNLEGR…	802.935	AT3G05060.1	0		NOP56-like pre RNA processing ribonucleoprotein			probable nucleolar protein 5-2
LOC18774371	PRUPE_6G134300	ATGGCGCTTTCCTGGGTGCTCCCAACAACACTTCTCTTTGCTCTGGCTTTTGCAAACATTCAGCTCTCCACATGCCAAGTTGTGAAGGCCAAGGTCACTTGCCTTGACTGCCATCAAAATACTGATTTCTCGGGAATTAAGGTTCTGGTGAAGTGTGGTCAAGTGAAAAAGTTGGCAATGGCAACAACTGAAAAAGATGGTTCATTTGAGACTAAGCTCCCAGTAGGCAACTCAAAATCTCCTATGAACTGCCTTGCCAGGATTCTAGGAGGTCCAGACCAGCTCTATGCTTCAAGAAAAGTCGTGGCTTCTGAGATTGTCAAGACCCAAGAGCCTAACTCCTACACCATTTCAACTCCTCTTGGTTTCACCACATCATGCCCTTTGAACATAAAAGAG…	MALSWVLPTTLLFALAFANIQLSTCQVVKAKVTCLDCHQNTDFSGIKVLVKCGQVKKLAMATTEKDGSFETKLPVGNSKSPMNCLARILGGPDQLYASRKVVASEIVKTQEPNSYTISTPLGFTTSCPLNIKEAACKAMNKFGSSKTVNLPLPPDWGLAPSSYYVPFIPIIGIP	806.38	AT5G22430.1	1e-43		Pollen Ole e 1 allergen and extensin family protein			uncharacterized
LOC18774375	PRUPE_6G213600	ATGGCCCTATATCCCTCTTTGAGAAGCCTCATTGCTTCTCTCTGCTTTTGTTTTCTTGCTTTTTCTCTCTCAGCTTTTGGACGACCAGCCACTTTTCTGCAAGACTTCCAAGTCACATGGTCTGATTCTCACATCAGGCAGATCGATGGAGGGAGGGCCATCCAACTCATTCTTGACCAAAATTCTGGATGTGGGTTTGCCTCCAAACGCAAGTACTTGTTTGGGCGTGTGAGCATGAAGATCAAGCTCATCCCTGGAGATTCTGCTGGAACTGTCACTGCTTTCTATATGAACTCAAACACAGACGCAGTGCGTGATGAGGTAGACTTTGAGTTCTTGGGGAACCGGACTGGGCAGCCTTATACAGTCCAAACCAATATATATGCTCATGGGAAGGGT…	MALYPSLRSLIASLCFCFLAFSLSAFGRPATFLQDFQVTWSDSHIRQIDGGRAIQLILDQNSGCGFASKRKYLFGRVSMKIKLIPGDSAGTVTAFYMNSNTDAVRDEVDFEFLGNRTGQPYTVQTNIYAHGKGNREQRVNLWFDPAADFHTYTILWNHHHIVFYVDDVPIRVYKNNEARGVPYPKLQPMGVFSTLWEADDWATRGGLEKINWSKAPFFSYYKDFDIEGCSVPGPANCASSATNWWEGTAYQALNALEYRRYRWVRINHMIYDYCTDKSRYPVAPPECLAGF	508.454	AT5G65730.1	8e-168	XTH6	xyloglucan endotransglucosylase/hydrolase 6			probable xyloglucan endotransglucosylase/hydrolase protein 6
LOC18774408	PRUPE_6G077600	ATGCCAAGAAGCAGTTTCTCAGGGATGATATCAGGGCCAAGGGTTGACGTGATAATCGACTTGGGGAACCCCTTGCTCAACCATACCGTCGATGGCTTCTTGAAGATCGGAACCGTCGCTGCTACAAGAGCTGCTGCAGAGGATGCTTACTCGATGGTCAAGAAAGGGAGCATTTCCACTCACGATGCTGAGCACACTTTGAAGAAGATGTGTAAAGAAGGTGCATATTGGGGAACTGTAGCCGGAGTGTATGTGGGAGCAGAGTATGGTTTAGAAAGGGTCCGTGGCACCAGAGACTGGAAGAATGCCATGATGGGGGGTGCTTTGACAGGGGCTCTAGTATCTGCAGCCACCAATAAGGGCAAGGATAAAGTTATTGTGGATGCAATTACAGGAGGT…	MPRSSFSGMISGPRVDVIIDLGNPLLNHTVDGFLKIGTVAATRAAAEDAYSMVKKGSISTHDAEHTLKKMCKEGAYWGTVAGVYVGAEYGLERVRGTRDWKNAMMGGALTGALVSAATNKGKDKVIVDAITGGAIATAVEFINYLT	810.732	AT2G28900.1	3e-63	OEP16, ATOEP16-L, ATOEP16-1, OEP16-1	outer plastid envelope protein 16-1			outer envelope pore protein 16, chloroplastic
LOC18774421	PRUPE_6G225300	ATGGAGCGAAACAACGTGTTCACAATCGCACTCATCTGCATTCTCGTCGCCGGAGTCGGAGGCCAAGCTCCGGCAGCCGCGCCGACAAAGTCTCCGGCGACCCCAGCTGCAACCACACCCACTACTTCACCATCAGCTGCAACCACACCCACCACTTCACCACCAGCTGCAGCTCCCACAAAGCCCAAGTCACCATCTCCAGTCGCTTCCCCAAAATCGGCTCCACCCGCTTCAACTCCGGTGTCGGCAACACCCAAGCCTGCGGCCGCGGCTCCAACTCCGGTGGCTACTCCTCCTACTGTTGCCGTTTCACCTCCATTGCCAGCTCCAGTGAGCTCACCACCTTCTAAGGCTCCGGCCAGCTCTCCACCGGCTAAATCTCCTCCGGCAGCCGCTCCG…	MERNNVFTIALICILVAGVGGQAPAAAPTKSPATPAATTPTTSPSAATTPTTSPPAAAPTKPKSPSPVASPKSAPPASTPVSATPKPAAAAPTPVATPPTVAVSPPLPAPVSSPPSKAPASSPPAKSPPAAAPAPVAEPPTTPEAPTPAPSKKKSKHKSPAAAPTPASDSPPAPPAEAPGAASPGAETPAPSVADDQSGAVRCLHKVVGYIALGWAVLALF	556.721	AT4G37450.1	1e-14	AGP18, ATAGP18	arabinogalactan protein 18			lysine-rich arabinogalactan protein 18
LOC18774456	PRUPE_6G236800	ATGCCTCCAAAGTTCGACCCATCTCAGGTGGTCGATGTCTACGTCCGCGTCACCGGAGGCGAGGTCGGCGCCGCCAGTTCCCTCGCTCCCAAGATCGGTCCTCTGGGTCTCTCCCCAAAGAAGATCGGAGAAGACATTGCTAAAGAGACAGCCAAGGACTGGAAGGGTCTGAGAGTCACCGTCAAGCTCACCGTTCAGAATCGTCAGGCGAAGGTCTCTGTGGTGCCTTCAGCTGCGGCTCTGGTCATCAAAGCCCTGAAGGAGCCAGAGAGAGATCGCAAGAAGACGAAGAACATCAAGCACAGCGGTAACATTTCATTGGATGATGTAATTGAGATTGCTAAGATCATGAAGCACAGGTCCATGGCCAAGGAGTTGGCTGGGACGGTGAAGGAGATT…	MPPKFDPSQVVDVYVRVTGGEVGAASSLAPKIGPLGLSPKKIGEDIAKETAKDWKGLRVTVKLTVQNRQAKVSVVPSAAALVIKALKEPERDRKKTKNIKHSGNISLDDVIEIAKIMKHRSMAKELAGTVKEILGTCVSVGCTVDGKDPKDLQQEIADGDVEIPLD	748.45	AT2G37190.1	1e-103		Ribosomal protein L11 family protein			60S ribosomal protein L12
LOC18774469	PRUPE_6G248800	ATGGAGACACAGAGGATAATGGAGTTTCCTCACAAGAATATGGATAAGCGGCCCAGAAAGAGGCCTCGATTAGCATGGGACATGCCCCCTCCTCTTCCTCCTCCTGAGCTGTTCCCAGCAATTTACTGCGGGCAGGATTTTGGGAATGGGCCAATCCCCAATTACACCTATACGTCTATGTTTTATGGGGGGTTGCCACGCAATGCTTCCCCTCCGTGGAGACCTGATGATAAAGATGGTCATTACGTGTTCGGCATCGGAGAAAATTTAACCCCTCGATACAGAATTCTCAGCAAAATGGGAGAGGGAACTTTTGGGCAAGTGTTGGAATGTATTGACAATGAAAAGAAAGAAGTTGTGGCAATCAAAATTGTCCGCTCCATACATAAGTATCGTGAA…	METQRIMEFPHKNMDKRPRKRPRLAWDMPPPLPPPELFPAIYCGQDFGNGPIPNYTYTSMFYGGLPRNASPPWRPDDKDGHYVFGIGENLTPRYRILSKMGEGTFGQVLECIDNEKKEVVAIKIVRSIHKYREAAMIEIDVLQRLGRHDIGGTRCVQIRNWFDYRNHICIVFEKLGPSLYDFLRKNSYRSFPIDLVRELGRQLLESVAFMHDLRLIHTDLKPENILLVSSDYIKVPDYKFLSRSTKEGSYFKNLPKSSAIKLIDFGSTTFEHQDHSYVVSTRHYRAPEVILGLGWNYPCDIWSVGCILVELCSGEALFQTHENLEHLAMMERVLGPLPQHMVLRADRRADKYFRRGARLDWPDGATSRESMRAVCKLPRLPNLIMQHVDHSAGDLIELL…	230.285	AT3G53570.4	0	AFC1, AME2, FC1	FUS3-complementing gene 1	Kinase		serine/threonine-protein kinase AFC1
LOC18774506	PRUPE_6G037800	ATGTCAGGCGTGGCAACTCTTGGTCAGGCATGCTGGGCTGCTGCCGGCGTAAAGGTGAAGAAGGCAAAGACCGCCATTTCCCAAGCCCAAATTCAAAACCCAAAACCCAAATCTTTAGCTCTTCCCTTGTCAGCTAATTGCAGCCGCAACCTCTTCTCCTTCAGCCCCAAAGCCATCACCAAACCCTCCTCCTCCTCATCCGTCCGTACATCTGTCGCCGCCGTAGACTCCGACCAGCTCAGCTCCTCCGATTCCGCCGAAAAGCAAAAGGCGAGCAGGTACTATTTCGTTGTTGCGAATGCCAAGTTCATGCTGGACGAGGAGGAGCATTTCCAGGAGCAATTGTGTGAGCGGCTTCGCTACTATGGAGAGCGTAACAGAGAGCAGGACTTTTGGCTT…	MSGVATLGQACWAAAGVKVKKAKTAISQAQIQNPKPKSLALPLSANCSRNLFSFSPKAITKPSSSSSVRTSVAAVDSDQLSSSDSAEKQKASRYYFVVANAKFMLDEEEHFQEQLCERLRYYGERNREQDFWLVIEPKFLDKFPNITKRLGRPAVALVSTNGPWITFMKLRLDRVLAESFEAESLEEALASTPTNIEFEKPEKWVAPYSKYESGWWGPFLPPGSNEEAKV	266.832	AT5G58250.1	2e-74		unknown protein; FUNCTIONS IN: molecular_function unknown; INVOLVED IN: biological_process unknown; LOCATED IN: thylakoid, chloroplast; EXPRESSED IN: 22 plant structures; EXPRESSED DURING: 14 growth stages; CONTAINS InterPro DOMAIN/s: Protein of unknown function DUF2488 (InterPro:IPR019616); Has 1807 Blast hits to 1807 proteins in 277 species: Archae - 0; Bacteria - 0; Metazoa - 736; Fungi - 347;…			uncharacterized
LOC18774536	PRUPE_6G108800	ATGGCCAAGAAGAAGAACAAAAGTGGCGGTGAGAACAACAACAACGATGTGGCTGAGAAGAAGAACGGCGATGGAGGTGAGAAGAACAGCGGCGCTGGGGGTGAGAAGAAGAAGGAGGACGGCCCCATCCCCGTTGTGTTGAAGGTTGACATGCACTGTGAGGGCTGTGCTACTAAGATTGTCAAATGCGTCAAAGATTTTCAAGGCGTGGAGTCGGTGAAATCTGAGTTCCAGGCGAATAAGCTGACGGTGGTCGGAAACGTGGACCCCACACAGCTCAAAGACAAGCTGGCCGCCAAGACCAAGAAGAAAGTCGACCTCATCTCTCCCCAGCCCAAAAAGGACAACAAAGACGACGCCAAGAAAAACCAGCCTGAGAAAGCAAACGACGACAACAAA…	MAKKKNKSGGENNNNDVAEKKNGDGGEKNSGAGGEKKKEDGPIPVVLKVDMHCEGCATKIVKCVKDFQGVESVKSEFQANKLTVVGNVDPTQLKDKLAAKTKKKVDLISPQPKKDNKDDAKKNQPEKANDDNKKPKEAPVTTAVLKLSLHCQGCIGKIQKTVSKTKGFHDMTIDRQKDLVTVKGSMDMKELAETLKEKLKRPVDIVPPKKEKEKEKGENNGGGGGGGDKKKKEEEGGNGGGKMEGHKMEYPAGLPGFGQVPYGMVYGPGFGAGYGYPPHALPPQTLPPQAPYIGNPLHAPQMFSDENPNACSIM	1107.03	AT5G60800.1	4e-63		Heavy metal transport/detoxification superfamily protein			heavy metal-associated isoprenylated plant protein 3
LOC18774569	PRUPE_6G137600	ATGGCTCTGGTCCCATCTCCAGCTCTGGTCGCCGAGGTTGAGATGGGTGCTGACCCCTCCGCACCCACTGTTCGAGCCACCGTGGTCCAAGCCTCCACTGTCTTCTACGACACTCCTTCCACTTTAGATAAGGCTGAGAGGTTATTGGCTGAAGCAGCTGGGTATGGTGCCCAGTTGGTTGTGTTTCCGGAAGCTTTTGTGGGTGGTTATCCACGTGGGTCAAATTTTGGCATTGTCATTGGGAACAGAACAGCTAAGGGTAAAGAAGAGTTCCGAAAGTATCATGCTTCAGCCATTGATGTTCCTGGTCCTGAAGTTGATCGATTGGCAGCAATGGCTGGAAAGTACAAGGTATTCTTGGTAATGGGTGTGATAGAGAGAGATGGATATACACTCTAT…	MALVPSPALVAEVEMGADPSAPTVRATVVQASTVFYDTPSTLDKAERLLAEAAGYGAQLVVFPEAFVGGYPRGSNFGIVIGNRTAKGKEEFRKYHASAIDVPGPEVDRLAAMAGKYKVFLVMGVIERDGYTLYCTVLFFDSQGSYLGKHRKIMPTALERIIWGFGDGSTIPVFETPIGKIGAAICWENRMPLLRTAMYAKGIEIYCAPTADSRDVWQASMTHIALEGGCFVLSANQFCRRKDYPPPPEYVFAGTEEELTPDSVVCAGGSVIISPSGAILAGPNYDGEALISADLDLGEIAREKFAFDVVGHYSRPEVLSLTVKDHPTNPVTFVAASTKTEVSHTP	267.693	AT5G22300.1	0	NIT4, AtNIT4	nitrilase 4			bifunctional nitrilase/nitrile hydratase NIT4A
LOC18774672	PRUPE_6G085500	ATGGCTCCAACTAAAGCTGATGTTTCAAAAAAAGCTGATCCAAAGTCACAAGCCGTGAAAGCTGCAAAGGCTTTGAAATCGGGCCCCATCCTTAAGAAGAAGGCCAAGAAGATCCGAACTTCAGTTACATTTCATCGGCCCAGGACATTGAAAAAGGAGAGGAACCCTAAGTATCCTCGTATCAGTGCTCCACCAAGGAACAAGCTCGATCATTATCAAATTTTGAAGTATCCTCTTACTACTGAATCTGCAATGAAGAAGATTGAAGACAACAACACTTTGGTGTTTATTGTTGACATACGTGCTGACAAGAAGAAAATTAAGGATGCAGTCAAGAAGATGTATGACATTCAGTCCAAGAAAGTGAATACCTTGATCAGGCCTGATGGTACCAAAAAG…	MAPTKADVSKKADPKSQAVKAAKALKSGPILKKKAKKIRTSVTFHRPRTLKKERNPKYPRISAPPRNKLDHYQILKYPLTTESAMKKIEDNNTLVFIVDIRADKKKIKDAVKKMYDIQSKKVNTLIRPDGTKKAYVRLTPDYDALDVANKIGII	205.601	AT3G55280.2	1e-71	RPL23AB	ribosomal protein L23AB			60S ribosomal protein L23a
LOC18774728	PRUPE_6G318700	ATGGGTATCGATCTTGTTGCAGGAGGTAAGAGCAAGAAGACCAAGCGCACTGCGCCCAAGTCCGATGATATTTATCTCAAGCTTCTCGTCAAGCTCTACCGCTTTCTTGTCCGGAGAACTGGAAGCAAGTTCAATGCGGTCATTCTCAAACGTCTCTTCATGAGCAAAGTCAACAAGGCACCACTTTCTCTCTCAAGGTTGATTCGTTATATGCAAGGAAAGGACAACAAGATTGCTGTGGTTGTGGGGACTGTGACAGATGATATTCGCGTTTATGAAGTTCCTCAATTGAAGGTTACAGCACTCAGATTTACTGAGACTGCAAGGGCCAGGATTGAGAAGGCAGGAGGAGAGTGCCTAACATTTGATCAGCTTGCATTGAGGGCACCATTGGGTCAG…	MGIDLVAGGKSKKTKRTAPKSDDIYLKLLVKLYRFLVRRTGSKFNAVILKRLFMSKVNKAPLSLSRLIRYMQGKDNKIAVVVGTVTDDIRVYEVPQLKVTALRFTETARARIEKAGGECLTFDQLALRAPLGQNVVLLRGPKNAREAVKHFGPAPGVPHSHTKPYVRSKGRKFEKARGKRNSKGFRV	279.7	AT5G27850.1	7e-119		Ribosomal protein L18e/L15 superfamily protein			60S ribosomal protein L18-2
LOC18774739	PRUPE_6G086600	ATGGCGAGGATCAAGGTCCACGAGCTCAGAAACAAGACAAAGGCAGAGCTTTTGGGTCAACTGAAGGATCTGAAGGCAGAGCTTGCCCTCCTCCGAGTCGCCAAGGTCACCGGTGGAGCCCCCAACAAGCTCTCCAAAATCAAGGTGGTGAGGCTTTCAATAGCACAGGTGTTGACAGTGATTTCCCAGAAGCAAAAAGCGGCTCTAAGGGAAGTCTACAAGAACAAGAAGTTTCTTCCTCTGGATTTGCGCCCAAAGAAGACCAGGGCCATCAGAAGGCGTCTGACCAAGCATCAGGCATCTTTGAAGACAGAACGGGAGAAGAAGAAGGAGATGTACTTCCCATTGAGGAAGTTTGCAATCAAAGCATAA	MARIKVHELRNKTKAELLGQLKDLKAELALLRVAKVTGGAPNKLSKIKVVRLSIAQVLTVISQKQKAALREVYKNKKFLPLDLRPKKTRAIRRRLTKHQASLKTEREKKKEMYFPLRKFAIKA	639.621	AT2G39390.1	2e-72		Ribosomal L29 family protein			60S ribosomal protein L35
LOC18774769	PRUPE_6G046700	ATGCTTTCAGGGGACATACCGCCTAACCAAACAATATACATTAAGAACCTCAACGAGAAAATCAAAAAAGAAGAATTGAAGAGGTCCCTGTATTGCTTATTCTCGCAATATGGAAAGATTTTGGATGTTGTAGCTTTGAAGACACCCAAGCTTCGTGGGCAAGCATGGGTTGCATTTCTAGAAGTGACTTCTGCCAGTAATGCTGTGCGTCAGATGCAAAACTTCCCATTTTATGATAAACCCATGCGGATTCAATATGCAAAAACAAAGTCAGATTGCATAGCTGATGCAGATGGAAGCTTAGGTCCAAAAGAAAAGAAAAAGAAGCAGGATGATAAAGCTGAAAGAAAGAAGCGAGGTGATGAAGGGCAGCAATCTGCTACGGAAAATGGTGCAACT…	MLSGDIPPNQTIYIKNLNEKIKKEELKRSLYCLFSQYGKILDVVALKTPKLRGQAWVAFLEVTSASNAVRQMQNFPFYDKPMRIQYAKTKSDCIADADGSLGPKEKKKKQDDKAERKKRGDEGQQSATENGATAENGGRTASSRQGNPNAHEAAAPNSILFIENLPHETTSAMLELLFKQYPGFREVRLIEAKPGIAFVEFEDDIHSSMAMTALQGFRITPQNSMAISFAKK	227.032	AT2G30260.1	1e-118	U2B''	U2 small nuclear ribonucleoprotein B			U2 small nuclear ribonucleoprotein B'' 2
LOC18774813	PRUPE_6G155500	ATGGCCGACCGAGTCCACCCGCGCGACTCGCCCTTTCACACCGAAACGACGCCGTTGTCCTTATCAAGGCCCTCACCGCCAGACTCCGAGAAGCCCGTCCCTCCGCCGGGCACCTACGTCATCCAGATCCCCAAAGATCAGGTCTACCGGGTCCCGCCGCCGGAGAATGCCAGCCGCTACCAGAGCTACACTCATCGGAAGACTCGCCGGAGCTCCTGCCACTGCTGCTGCTGCTGGTTCCTTGGCCTCCTCGCCGCCATCGTTTTCCTCTCCGCGGCCGCCGCCGGCATCTTCTACCTCGTCGTCCGCCCCGAGGCCCCCAACTACTCCGTTGAGAGCATCGCATTTAAAGGCTTCAACCTCACAACGACGTCGTCCCCGCCGTCCGCCATCTCGCCT…	MADRVHPRDSPFHTETTPLSLSRPSPPDSEKPVPPPGTYVIQIPKDQVYRVPPPENASRYQSYTHRKTRRSSCHCCCCWFLGLLAAIVFLSAAAAGIFYLVVRPEAPNYSVESIAFKGFNLTTTSSPPSAISPEIHVTVRAQNPNKKIGIYYERESSVKLFYSDIKLCDGVLPAFYQPSKNVTEFRTALTGSGIELTSAVQKGLVDAQKQGKVPLELDLRAPVRIKVGPIKTWTITVKVACHLTVNKLTADANIVSRDCDYSVDPW	292.329	AT2G27080.2	2e-91		Late embryogenesis abundant (LEA) hydroxyproline-rich glycoprotein family			NDR1/HIN1-like protein 13
LOC18774817	PRUPE_6G332900	ATGAGTTCTAAAGAAGCTGGTTCGACGAAGGGAGGCAGGGGCAAACCGAAGGCCTCCAAGTCTGTATCGAGGTCTCATAAAGCGGGGCTCCAGTTTCCGGTGGGTAGGATCGCCCGATTTCTTAAGGCTGGCAAGTACGCCGAGCGGGTTGGTGCTGGCGCACCTGTATATCTCTCCGCCGTGCTCGAATACCTTGCTGCAGAGGTATTGGAGCTTGCTGGAAATGCTGCAAGGGATAACAAGAAGAACCGTATTGTGCCAAGGCACATCCAACTGGCCGTGAGGAACGACGAAGAGCTAAGCAAGCTATTGGGGTCTGTGACCATTGCTAATGGAGGAGTGTTGCCAAACATCCACCAAACTCTTTTGCCGAAGAAGGTGGGCAAAGGCAAGGGCGAT…	MSSKEAGSTKGGRGKPKASKSVSRSHKAGLQFPVGRIARFLKAGKYAERVGAGAPVYLSAVLEYLAAEVLELAGNAARDNKKNRIVPRHIQLAVRNDEELSKLLGSVTIANGGVLPNIHQTLLPKKVGKGKGDIGSASQEF	331.507	AT1G54690.1	9e-89	HTA3, H2AXB, G-H2AX, GAMMA-H2AX	gamma histone variant H2AX			histone H2AX
LOC18774822	PRUPE_6G299900	ATGGAGAAATACGAGAAGCTGGAGAAGGTAGGAGAAGGCACGTACGGCAAGGTCTATAAGGCCAAGGACAAGGCCACAGGCCAACTGGTCGCGCTGAAGAAGACGCGTCTGGAGATGGACGAAGAAGGCGTCCCTCCCACCGCGCTCCGCGAGGTCTCTCTTTTGCAAATGCTCTCTCAGTCGCTCTACATCGTACGGCTTCTCTGCGTTGAGCACGTCGACAGCAAGGAAGGCAAGCCCGTCCTCTACCTCGTCTTCGAGTACCTCGACACCGATCTCAAGAAGTTCATCGATTCTCACCGGAAAGGTCCTAGTCCGAGGCCCTTGGCGCCGTCGATGGTCCAGAGCTTCCTCTACCAACTGTGCAAGGGGGTGGCCCACTGTCACTCCCATGGCGTC…	MEKYEKLEKVGEGTYGKVYKAKDKATGQLVALKKTRLEMDEEGVPPTALREVSLLQMLSQSLYIVRLLCVEHVDSKEGKPVLYLVFEYLDTDLKKFIDSHRKGPSPRPLAPSMVQSFLYQLCKGVAHCHSHGVLHRDLKPQNLLLDKERGILKIADLGLGRAFTVPLKSYTHEIVTLWYRAPEVLLGSTHYSTGVDMWSVGCIFAEMVRRQALFPGDSEFQQLLHIFRLLGTPTDKQWPGVNALRDWHVYPQWQPQNLARAVPALGPDGVDLLEKMLKYDPAERISAKAALDHPYFDSLDKSQF	232.676	AT2G38620.2	0	CDKB1;2	cyclin-dependent kinase B1;2	Kinase		cell division control protein 2 homolog C
LOC18774836	PRUPE_6G339900	ATGGCCGAGGAAGCGAGCACTAAGCGCCCACTGAAAATCGTAGCAGGCGCCGACTCCTTTGGCTGCTCTCTCAAAGATGCCTTAGTCTCCCACCTCCGCTCTCTCAACATCGACGTCGAAGACCTCGGTACCTCCTCCTACTACTCCATCGCCGCCGATGTCGGCCGCCGCGTCTCCTCCTCCTCTGACGGCGCCGTCGAAACCCGCGGCCTCGTCGCCTGCGGCACCGGCGTCGGAGTCGCCATCTTCGCCAACAAGTTCCCGGGCGTGTTCGCCGCCACGTGTCTCAACCCCTCCGAAGCCCAAAACGCTCGCTCCATCAACAACTCCAACGTCCTCGCCGTCTCCGGCATGTCCACGGCACCGGACTCCGCCATCGAGATCCTCGACACCTGGCTC…	MAEEASTKRPLKIVAGADSFGCSLKDALVSHLRSLNIDVEDLGTSSYYSIAADVGRRVSSSSDGAVETRGLVACGTGVGVAIFANKFPGVFAATCLNPSEAQNARSINNSNVLAVSGMSTAPDSAIEILDTWLNTPFKSPCPASDSKPWPPEIETFLDNSIKEMPKIGAEEEKQAALGSEEASCTLCCLVKNRKLNPIDIIPGGSMKILRETPTSAIVRFKAGSVEPAHHHTFGHDLVVLEGKKSVWNLTKKARYDLGVGDYLFTPAGDSHRVKYYEDTEFFIKWEGQWDMFFDEELEAAHKAVAQELENGSN	307.875	AT3G04880.1	7e-155	DRT102	DNA-damage-repair/toleration protein (DRT102)			DNA damage-repair/toleration protein DRT102
LOC18774844	PRUPE_6G179300	ATGGGAGTTGGAGGAACTTTGGAGTATTTGTCTGATTTAGTGAACAACAGCGGCCATAAACACAAAAAGAAGAAGCAATTACAGACTGTGGAGCTCAAAGTCAGAATGGACTGTGATGGCTGTGAGCTTAAGGTCAAGAAGGCCCTCTCTTCTTTAAGTGGAGTTAAATCTGTGGAGATTAACAGGAAGCAGCAGAAGGTGAGTGTGACAGGTTATGTTGAAGCAAACAAAGTGCTGAAGAAGGCAAAGTCAACAGGGAAGAGGGCAGAGATATGGCCTTATGTACCCTACAACTTAGTGGCACAGCCCTACATTGCCCAAGCTTATGACAAGAGGGCACCTCCTGGTCATGTCAGAAATGTGGAGAACATGAACATGACCTCCTCCACTGGCACTGTC…	MGVGGTLEYLSDLVNNSGHKHKKKKQLQTVELKVRMDCDGCELKVKKALSSLSGVKSVEINRKQQKVSVTGYVEANKVLKKAKSTGKRAEIWPYVPYNLVAQPYIAQAYDKRAPPGHVRNVENMNMTSSTGTVTRYEDPYTTMFSDDNPNACSIM	219.044	AT4G39700.1	5e-72		Heavy metal transport/detoxification superfamily protein			heavy metal-associated isoprenylated plant protein 23
LOC18774876	PRUPE_6G131900	ATGGCATCAAGGATGGCTGCAAGGTTTGTTACTCGGAGGCTGTCAAGCAGTGGAAAAGTGCTTAGTGAGGAGGAAAGAGCTGCAGAGAACGTTTACATTAAGAAAACCGAGCAAGAGAAGCTGCAGAAACTTGCACGTAAAGGCCCTAAACCAGAAGAGAACCCAACTGCAAGCTCAGAGGGCTCGATATCTGATGCCAAACCAAGTGGCTCTACCTCTGGAGAATCAACTGCCAAAGTATCCACTGACAAGTACCGGAATTATGCTGTTGTAGCAGGTGTTGTAACTGTTGGCGCTGCTGCAGGTTGGTATCTCAAATCTAGTGGAAAGAAACAAGAAGTGCAGGACTGA	MASRMAARFVTRRLSSSGKVLSEEERAAENVYIKKTEQEKLQKLARKGPKPEENPTASSEGSISDAKPSGSTSGESTAKVSTDKYRNYAVVAGVVTVGAAAGWYLKSSGKKQEVQD	276.638	AT2G27730.1	6e-32		copper ion binding			uncharacterized protein At2g27730, mitochondrial
LOC18774889	PRUPE_6G082000	ATGGCGCCCAAAGCCGAGAAGAAGCCCGCCGAGAAAAAGCCAGCTGAGGAGAAGAAGTCTACGGTGGCTGAGAAAGCCCCAGCTGAGAAGAAGCCCAAGGCCGGCAAGAAGCTCCCGAAGGAAGCCGGAGCTGCCGCCGGAGATAAGAAGAAGAAGAGATCGAAGAAGAGCGTAGAGACCTACAAGATCTACATCTTTAAGGTGCTGAAGCAGGTCCACCCTGATATCGGGATCTCCAGCAAGGCCATGGGCATCATGAACAGCTTCATCAATGATATCTTCGAGAAGCTCGCTCAGGAGTCTTCCAGGCTTGCAAGGTACAACAAGAAGCCCACGATTACTTCTCGGGAGATCCAGACAGCTGTGAGACTTGTGCTTCCTGGTGAGCTCGCCAAGCAC…	MAPKAEKKPAEKKPAEEKKSTVAEKAPAEKKPKAGKKLPKEAGAAAGDKKKKRSKKSVETYKIYIFKVLKQVHPDIGISSKAMGIMNSFINDIFEKLAQESSRLARYNKKPTITSREIQTAVRLVLPGELAKHAVSEGTKAVTKFTSS	305.245	AT3G45980.1	1e-83	H2B, HTB9	Histone superfamily protein			probable histone H2B.1
LOC18774894	PRUPE_6G235900	ATGACTGCCTCCACGGCTTCGCTAGCTCTTCCTTCTCTTTACCCCAAAACACTAGCCCTTTACACTCCCAAACCCACTTCAGTCCCGTTCTACTCTGTCTCTTCGTCATCTCTAACGCTCGGCTGTAAGCCCATTTCAATTTCGGCTTCATTTCTCAACTCGGGAAGGTTTCAGAGCGCGTCGTCTCGGTTCGTGCGAAACGTCGCCGTTTCGTCCGAGTTCGAGCAGGATGAGGAGGTTCTCAGCGACGATGGAGAGGCCAGTTTCGCGCCTGACCTCAAGCTCTTCGTCGGAAACCTTCCCTTCAGCGTTGACAGTGCTCAGCTCGCTGGGCTCTTCGAAAGTGCTGGAAATGTCGAGATGGTTGAGGTGATATATGACAAGACAACTGGAAGAAGC…	MTASTASLALPSLYPKTLALYTPKPTSVPFYSVSSSSLTLGCKPISISASFLNSGRFQSASSRFVRNVAVSSEFEQDEEVLSDDGEASFAPDLKLFVGNLPFSVDSAQLAGLFESAGNVEMVEVIYDKTTGRSRGFGFVTMSSVQEAEGAARQLNGYELDGRALRVNYGPPPPRSEDSFRGARGGGGSDSSNRLYVGNLAWGVDNLALENLFSEQGKVLEAKVVYDRDSGRSRGFGFVTYGTADEMNSAMESLDGVDLNGRSIRVTAAEPRPRRQF	422.611	AT2G37220.1	1e-101		RNA-binding (RRM/RBD/RNP motifs) family protein			29 kDa ribonucleoprotein A, chloroplastic
LOC18774925	PRUPE_6G033700	ATGGCCTCAAAGCGAATCAACAAGGAGTTGAAGGACCTTCAGAAAGACCCACCCGCATCCTGCAGTGCTGGTCCTGTTGCTGATGATATGTTCCACTGGCAAGCGACTATTATGGGTCCAGCAGACAGCCCATTTGCTGGAGGTGTTTTTCTTGTATCCATTCACTTCCCACCTGATTACCCTTTCAAGCCACCCAAGGTTGCCTTCCGGACAAAAGTCTACCATCCGAACATTAATAGCAATGGCAGTATCTGCCTTGACATCCTCAAAGAGCAGTGGAGCCCTGCCCTGACCATTTCCAAGGTACTTCTCTCCATATGCTCGCTGCTGACAGATCCAAACCCCGATGATCCTCTGGTGCCTGAGATTGCTCACATGTACAAGACTGATAGAGTGAAG…	MASKRINKELKDLQKDPPASCSAGPVADDMFHWQATIMGPADSPFAGGVFLVSIHFPPDYPFKPPKVAFRTKVYHPNINSNGSICLDILKEQWSPALTISKVLLSICSLLTDPNPDDPLVPEIAHMYKTDRVKYETTARSWTQKYAMG	854.934	AT5G56150.2	1e-102	UBC30	ubiquitin-conjugating enzyme 30			ubiquitin-conjugating enzyme E2-17 kDa
LOC18774940	PRUPE_6G236300	ATGATTGAGGTGGTGCTGAACGATCGTCTCGGGAAGAAGGTGAAAGTGAAGTGCAACGAGGATGACACCATAGGCGACCTCAAGAAGCTCGTGGCTGCTCAGACGGGTACCCGATCCGACAAGATTCGGATCCAGAAGTGGTACAACGTCTACAAGGACCACATCACCCTCAAGGACTATGAAATCCATGACGGCATGGGCCTCGAGCTCTATTACAACTAA	MIEVVLNDRLGKKVKVKCNEDDTIGDLKKLVAAQTGTRSDKIRIQKWYNVYKDHITLKDYEIHDGMGLELYYN	960.317	AT5G42300.1	3e-45	UBL5	ubiquitin-like protein 5			ubiquitin-like protein 5
LOC18774944	PRUPE_6G246300	ATGGGGAAGGGAGGGCAAGATTTCGGTAAACAGAAAGAGGACAAAAACCCTAGGCCGTCCGACGGCGATGTCTTCCCTGCGTGGGCAAAAGAGATTCAGGAGTGCGAGAAGCACTTCGGCGTTGACAGGAAATTAGGGTTGAGTTCCGCAGACGTCGAGAAGCGGCGCGAGAAGTATGGATGGAATGAGTTGGAGAAGCACGAGGGCCAGTCGATTTGGAGTCTGGTTCTGGAGCAGTTCAACGACACTCTGGTTCGAATTCTGCTCGCTGCGGCCGTCATTTCCTTTGTTCTGGCTTGGCTGGACGGGGAAGAAGGCGGCGAGAAGGAGATCACGGCGTTTGTGGAGCCGTTGGTGATCTTCTTGATCCTGATTGTGAACGCCATAGTTGGGGTTTGG…	MGKGGQDFGKQKEDKNPRPSDGDVFPAWAKEIQECEKHFGVDRKLGLSSADVEKRREKYGWNELEKHEGQSIWSLVLEQFNDTLVRILLAAAVISFVLAWLDGEEGGEKEITAFVEPLVIFLILIVNAIVGVWQESNAEKALEALKEIQSEHASVIRNGSKVPSLAAKELVPGDIVELKVGDKVPADMRVVELISSTLRVEQGSLTGESEAVNKTNKPVSEDVDIQGKKSMVFAGTTIVNGHCICLVAQTGMLTEIGKVHSQIHAASQSEEDTPLKKKLNEFGEMLTMIIGVICALVWLINVKYFLTWEYVNGWPANFKFSFEKCTYYFEIAVALAVAAIPEGLPAVITTCLALGTRKMAQKNALVRKLPSVETLGCTTVICSDKTGTLTTNQMAVAKL…	484.967	AT1G07810.1	0	ECA1, ATECA1, ACA3	ER-type Ca2+-ATPase 1			calcium-transporting ATPase 1, endoplasmic reticulum-type
LOC18774948	PRUPE_6G302700	ATGGCGGCTCTCTCGGCACTACTTGTTCTGGCTTTTGCCATGGTCTTTGGCAACTCTGCTGCTGATCCTGACTTGCTTCAAGACATTTGTGTCGCCGACCTCGCTGCCGGGGTGAAAGTCAATGGGTTCGTCTGTAAGGACGCAGCAAATGCAACAGCAGAGGACTTCTTCACCGCTGGGCTAGCCAAACCAGGCCTCACCAACAACACCTTTGGCTCACTGGTGACTGCAGCCAATGTGCTCAAAGTCCCAGGCCTCAACACTCTCGGAGTCTCACTGGCTCGAATCGACTATGGCCCCGGTGGCATTAACCCACCTCACACTCACCCCAGAGCTACAGAAATTGTGTTTGTGCTTGAAGGTGAGTTGGACGTTGGGTTTATAACCACAGCAAACAAG…	MAALSALLVLAFAMVFGNSAADPDLLQDICVADLAAGVKVNGFVCKDAANATAEDFFTAGLAKPGLTNNTFGSLVTAANVLKVPGLNTLGVSLARIDYGPGGINPPHTHPRATEIVFVLEGELDVGFITTANKLISKTIKKGEVFVFPKGLVHFQKNKGKVPAAVIAGFNSQLQGTVNIALTLFAATPDVPDHVLTQTFQVGTKEVEKIKSRLAPKA	1213.47	AT1G09560.1	4e-105	GLP5	germin-like protein 5			rhicadhesin receptor
LOC18774952	PRUPE_6G313900	ATGGCGTTTAGGGTTCCAAACTCTAGCTTGCTGTCCCTGATCCTCCTCTCTCTCCTAGCTATCGCCTCCGCCAAGGTCTTCTTCGAAGAACGCTTCGAGGACGGATGGGATAAACGTTGGGTTACTTCCGAGTGGAAGAAAGAGGAGAACCTGGCTGGTGAATGGAACTACACCTCTGGAAAATGGAATGGAGACCCTAATGACAAAGGTATCCAAACAAGTGAGGACTACAGGTTCTATGCCATATCAGCTGAGTTCCCTGAATTCAGCAACAAGGATAAGACACTCGTGTTTCAATTTTCTGTGAAGCATGAGCAGAAACTTGACTGTGGTGGTGGCTACATCAAGCTACTCAGTGGTGATGTTGATCAGAAGAAATTTGGCGGTGATACCCCATAC…	MAFRVPNSSLLSLILLSLLAIASAKVFFEERFEDGWDKRWVTSEWKKEENLAGEWNYTSGKWNGDPNDKGIQTSEDYRFYAISAEFPEFSNKDKTLVFQFSVKHEQKLDCGGGYIKLLSGDVDQKKFGGDTPYSIMFGPDICGYSTKKVHAILNYNNTNNLIKKDVPCETDQLTHVYTFIIRPDATYTILIDNAEKQTGSLYSDWDLLPAKKIKDPEAKKPEDWEDQEYIPDPEDKKPEGYDDIPKEIADSDAKKPEDWDDEEDGEWTAPTIPNPEYKGEWKPKKIKNPNFKGKWKAPLIDNPEFKDDPELYVYPNLKYVGIELWQVKSGTLFDNILITDEPEYAKQLAEETWGKQKDAEKAAFEELEKKLQEEESKEDPVDSDAEDDDADAEDGEESD…	958.547	AT1G56340.2	0	CRT1, CRT1a, AtCRT1a	calreticulin 1a			calreticulin
LOC18774959	PRUPE_6G002500	ATGGCATCCACTTTTGCAGCCATGACTTCAGTTGGCTCCTTGGCTGCTCCTAGTAGCCGTGTGATTGATAGGAAATTCGACAACTTGTCATCTCGTGCTTCCATTTCTCCATTCTCATTCTCTAGGAGGCACAATGTAGTTCTAAGGAGGACACGATCTCCTAGGATCTGTGCCATGGCCAAGGAGTTGCATTTCAACAAGGACGGTTCAGCCATTAAGAAACTACAAACTGGTGTCAACAAGCTTGCCGACCTTGTTGGGGTTACACTTGGTCCAAAGGGTAGGAATGTCGTTCTAGAGAGCAAGTATGGCTCCCCCAAAATTGTTAATGATGGTGTGACTGTCGCAAAAGAGGTTGAGTTGGAGGACCCTGTTGAGAACATTGGAGCTAAGCTAGTG…	MASTFAAMTSVGSLAAPSSRVIDRKFDNLSSRASISPFSFSRRHNVVLRRTRSPRICAMAKELHFNKDGSAIKKLQTGVNKLADLVGVTLGPKGRNVVLESKYGSPKIVNDGVTVAKEVELEDPVENIGAKLVRQAAAKTNDLAGDGTTTSVVLAQGLIAEGVKVVAAGANPVLITRGIEKTTKALVHELKSMSKEVEDSELADVAAVSAGNNYEVGNMIAEALSKVGRKGVVTLEEGKSAENSLYVVEGMQFDRGYISPYFVTDSEKMAVEYENCKLLLVDKKITNARDLINILEEAIRGGYPVIIIAEDIEQEALATLVVNKLRGALKIAALKAPGFGERKSQYLDDIAILTGGTVIREEVGLTLDNVGKEVLGHASKVVLTKDTSTIVGDGSTQEA…	1113.49	AT3G13470.1	0		TCP-1/cpn60 chaperonin family protein			ruBisCO large subunit-binding protein subunit beta, chloroplastic
LOC18774990	PRUPE_6G065900	ATGTCGATCATTCCCAGCTTCCGACGAGGCAGCATTTTCGACCCTTCCTCTCTCGATATCTGGGACCCATTCAAGGATTTCCCATTCCCTTCCTCTTCATCACTCTCCACATTCCCTAAATTTTCCCGGGAAAATTCAGCTTTCCTGAACACGAGGATCGACTGGAAGGAGACCCCGGAAGCCCACTTGTTCAAGGCAGACCTTCCGGGGCTGAAGAAAGAAGAGGTGAAGGTGGAGGTTGAAGACAACAGGGTGCTTCAGATCAGCGGAGAGAGGAACGTAGAGAAGGAGGACAAGAACGACAAGTGGCACAGAGTGGAGCGCAGCAGCGGCAAGTTCTTGAGGAGGTTTCAGCTTCCTGAAAATGCAAAGTTGAACGAGATTAAGGCTGCAATGGAG…	MSIIPSFRRGSIFDPSSLDIWDPFKDFPFPSSSSLSTFPKFSRENSAFLNTRIDWKETPEAHLFKADLPGLKKEEVKVEVEDNRVLQISGERNVEKEDKNDKWHRVERSSGKFLRRFQLPENAKLNEIKAAMENGVLSVTVPKAEVKKPDVKAIEISG	245.975	AT1G53540.1	3e-69		HSP20-like chaperones superfamily protein			18.5 kDa class I heat shock protein
LOC18774996	PRUPE_6G113500	ATGGCGCCCAAGGCAGAGAAGAAGCCAGCCGAGAAGAAGCCAGCGGAGGAGAAGAAGGCCGAGAAGGCTCCTGCAGAGAAGAAGCCGAGAGCCGAGAAGAAGCTTCCCAAAGAAGCCTCTGGTGCCACTGACAAGAAGAAGAAGAGATCCAAGAAGAGCGTGGAGACCTACAAGATCTACATCTTCAAGGTCCTGAAGCAGGTCCACCCTGACATTGGGATCTCAAGCAAGGCCATGGGGATCATGAACAGCTTCATCAACGATATCTTCGAGAAGCTCGCCCAGGAGTCTTCGAGGCTCGCTAGATACAACAAGAAGCCGACGATCACTTCCAGGGAGATTCAGACCGCTGTGAGATTGGTTTTGCCTGGTGAGCTTGCTAAGCACGCCGTCTCGGAG…	MAPKAEKKPAEKKPAEEKKAEKAPAEKKPRAEKKLPKEASGATDKKKKRSKKSVETYKIYIFKVLKQVHPDIGISSKAMGIMNSFINDIFEKLAQESSRLARYNKKPTITSREIQTAVRLVLPGELAKHAVSEGTKAVTKFTSS	661.196	AT3G45980.1	7e-82	H2B, HTB9	Histone superfamily protein			probable histone H2B.1
LOC18775025	PRUPE_6G343700	ATGGCAATGTTTGAGCAGGATCTCAACTTTGAAGCCACAGAGCTTAGATTAGGCCTCCCAGGCACCAAGGAGCCTGAGCACAATACATGTTCTAGTGCTTTAATCAACAGGAGCAACAAAAGACCATTGCCAGCTGACATGAACGAAGACAAGTATTCTTCAGCTGCCAAAAGATGTGACCAACAAATTTCTCAGCCTCCTCCCTCCATGGCACAAGTAGTGGGGTGGCCACCAGTGCGATCGTACCGGAAAAATTGCTTGCAAGCAAAGAAAACAGAGGCGGAGGGTTGTGGGATTTATGTGAAAATAAGCATGGATGGAGCTCCATATCTTAGAAAGATGGATCTGAAGGTGTACAGAGGATATCCAGAGCTGCTTAAAGCCCTGGAAGACATGTTC…	MAMFEQDLNFEATELRLGLPGTKEPEHNTCSSALINRSNKRPLPADMNEDKYSSAAKRCDQQISQPPPSMAQVVGWPPVRSYRKNCLQAKKTEAEGCGIYVKISMDGAPYLRKMDLKVYRGYPELLKALEDMFKFKVGDYCEKDLGYNNRSEFVPTYEDKDGDWMLLGDVPWEMFITSCKRLRIMKGSEAKGLGCAL	523.714	AT1G04240.1	5e-77	SHY2, IAA3	AUX/IAA transcriptional regulator family protein			auxin-induced protein 22B
LOC18775029	PRUPE_6G229700	ATGGCTCTGCAAGAAGAACCCCAAGAGCTACAGAACCCTCCAATGGCTTTTGACGCTTTGTTTTGTGAAGAAGGTCTTGAGGAAGATTTGGGAGACAATGGTATTGAGGAAGAGAGTGAGGGTTGTGTTGGGAATATGGAAAAGCAGTCAACTTTCCCTCTGGTTTTGCTAGAAAATGACTTTTTTTGGGAAGATGATGAACTTGCCTCTCTAATCTCCAAAGAGGAACAGACCCATGTGTGTTTCAGTGGTTCAATCTCAGATGGGCCTTTAATGGCGGCTAGGAAAGAGGCAGTGGAGTGGATTTTGAGTGTTAAGGCACACTATGGGTTCTCTTCTTTGACTACTGTTTTAGCTGTGAACTACTTTGATAGGTTCATTGCCAGCCTACGGTTTCGG…	MALQEEPQELQNPPMAFDALFCEEGLEEDLGDNGIEEESEGCVGNMEKQSTFPLVLLENDFFWEDDELASLISKEEQTHVCFSGSISDGPLMAARKEAVEWILSVKAHYGFSSLTTVLAVNYFDRFIASLRFRRDKPWMSQLAAVACVSLAAKVEEIHVPLLLDLQVESSKYVFEAKTIQRMELLVLSTLGWRMNPVTPNSFFDHIIRRFGLKIHLHWEFLWRCERLLLSVIADSRFMCFMPSILATATMLHVIDEIEAFNPVEYQSQLMNVLKVSKDRVNECYKLILELSGSYGNIHNQSHKRKHLSVPGSPNGVIDASFSCDTSNDSWAAASPVSSSPDPRFKRSKLQDQQMRLPSLNRVSVDVLSSPH	289.841	AT5G67260.1	1e-127	CYCD3;2	CYCLIN D3;2			cyclin-D3-2
LOC18775031	PRUPE_6G280800	ATGGACACCAAAATCGGAGCACTTGACGTTTGCAAGCCCGCAAGCAACGAAGTGGGCAGCCTGCCAAACGGCACCGCTATGGCTATTCAGAATTCGGTCCCCTCCACCGTGATCAACTCGTCCGAGGCCACTCTAGGTCGCCACCTTGCTCGCCGACTCGTCCAAATCGGCGTCACCGACGTCTTCACTGTGCCCGGTGACTTTAACTTGACCCTCCTCGACCACCTCATCGCAGAGCCTGGGCTCACCAACATTGGCTGCTGCAACGAGCTCAACGCCGGCTACGCCGCTGATGGCTACGCTCGCTCTCGTGGCGTCGGCGCGTGTGTTGTTACTTTCACTGTGGGGGGGCTCAGTGTTCTCAATGCGATCGCTGGAGCCTACAGTGAGAACTTGCCT…	MDTKIGALDVCKPASNEVGSLPNGTAMAIQNSVPSTVINSSEATLGRHLARRLVQIGVTDVFTVPGDFNLTLLDHLIAEPGLTNIGCCNELNAGYAADGYARSRGVGACVVTFTVGGLSVLNAIAGAYSENLPLICIVGGPNSNDYGTSRILHHTIGLPDFTQELRCFQTVTCYQAVVNNLEDAHESIDTAISTALKESKPVYISISCNLAGIPHPTFIREPVPFSLSPRLSNQWGLEAAVEAAAEFLNKAVKPVMVGGPKLRVAHAGDAFVELADASGYALAVMPSAKGLVPEHHPHFIGTYWGAVSTAFCAEIVESADAYLFAGPIFNDYSSVGYSLLLKKEKAIIVQPDRVTIANGPSFGCVLMKDFLRALAKKLNHNNTAHENYRRIFVPDGHPL…	318.602	AT4G33070.1	0		Thiamine pyrophosphate dependent pyruvate decarboxylase family protein			pyruvate decarboxylase 2
LOC18775054	PRUPE_6G229000	ATGGCAGTGAGCAGAAAAGATATGGATCGGATAAAGGGTCCATGGAGTCCCGAAGAGGACGACGCTCTGCAGAGGCTGGTACAGAAGCACGGCCCCCGTAACTGGTCTCTGATCAGCAAGTCGATACCCGGTCGGTCCGGCAAGTCCTGCCGGCTCCGGTGGTGCAACCAGCTCTCCCCTCAGGTGGAGCACCGTGCCTTCACGCCAGAGGAAGACGACACCATAATCCGGGCCCACGCCCGCTTCGGCAACAAGTGGGCCACCATCGCCCGCCTCCTCAACGGCCGAACCGACAACGCCATCAAGAACCACTGGAACTCCACGCTCAAGCGTAAGTGCTCCGATATCGGCGTCGTTTTTCCCGGAGGAGGTGTAGGTGGAAGCGGAGGCTACGATGGT…	MAVSRKDMDRIKGPWSPEEDDALQRLVQKHGPRNWSLISKSIPGRSGKSCRLRWCNQLSPQVEHRAFTPEEDDTIIRAHARFGNKWATIARLLNGRTDNAIKNHWNSTLKRKCSDIGVVFPGGGVGGSGGYDGHFLHDHEQPPLKRSVSAGSGMPVSTGLYMSPGSPSGSDMSDSSIVPVMSLSECHVYRPVARSGGVLPLSETTSSSNDNNSNNEKQQEPTTSLSLSLPGVDSGEVSNRVAATESTQAPVPIPIPIPIPIQNPVPDPAPARAPFQNIPVELLAVMQGMIRKEVRSYMAGLEQSGICMQQAASNDGFRNVAVKRIGVSRIE	361.44	AT4G37260.1	3e-104	MYB73, ATMYB73	myb domain protein 73	TF		transcription factor MYB44
LOC18775072	PRUPE_6G150600	ATGGATCCAGATTCAGTGAAATCCACTCTCCAAAATCTAGCTTTTGGAAATGTAATGGCCGCCGCGGCTCGCAATTACCAGAAGGAATTGCTTGCCAATGAAAAGGCACCGGCCACGAGCTCTGTCAACCAGGAAGTCGACCTTGACGAGTTGATGGATGATCCTGAGCTTGAAAAGTTGCATGCGGATCGGATTGCTGCTCTAAAGAAAGAAGCTGAGAAGAGAGAAGCTTTAAAGAGGAAAGGGCATGGAGAATATAGGGAGATAACTGAAGGGGATTTTTTAGGTGAAGTTACTGGGACTGAGAAAGCCATCTGCCACTTCTATCACCAGGAGTTCTATAGATGCAAGATAATGGATAAGCATTTGAAGACCCTTGCTTCAAAGCATGTTGATACC…	MDPDSVKSTLQNLAFGNVMAAAARNYQKELLANEKAPATSSVNQEVDLDELMDDPELEKLHADRIAALKKEAEKREALKRKGHGEYREITEGDFLGEVTGTEKAICHFYHQEFYRCKIMDKHLKTLASKHVDTKFIKLDAENAPFFITKLGVKTLPCVIIFRKGVAVDRLVGFQDMGGKDDFSTRALEVVLIKKGIISEKKDEDDEDDGYNDGSRRTVRSSVNLDDSDSD	213.877	AT5G66410.1	7e-123	PLP3b	phosducin-like protein 3 homolog			thioredoxin domain-containing protein PLP3A
LOC18775079	PRUPE_6G039800	ATGGCAGATGACAATCAGAATGAGGTGAAGGACGAGGTGGTACCAGATATTGCCCCTTTTGATCCTACTAAAAAGAAGAAAAAGAAGAAGGTTGTAATTCAGGATATTAATGATGATTCTGTGGACAAGCTGGCTGAGAAAACGGAAAACCTGGCAGTTTCTGATGGGCAGGAGAGTACATTTTCTGGTTTGAAAAAGAAGAAGAAGAAGCCAGTTGAAACCAGTATCTTGAATGAAGACAGTGGCGATGCAGTGGAAGATTTAAATGAGCGCGCTGGCGAGGATGAGGAAGGTGAAGGAATTGTTCTTGAGGCTCCATCCTATCCTTGGGAGGGGAGTGATCGTGATTACACATATGAGGAGCTTCTTGATAGGGTGTTTAACATTCTGCGTGAGAAT…	MADDNQNEVKDEVVPDIAPFDPTKKKKKKKVVIQDINDDSVDKLAEKTENLAVSDGQESTFSGLKKKKKKPVETSILNEDSGDAVEDLNERAGEDEEGEGIVLEAPSYPWEGSDRDYTYEELLDRVFNILRENNPELAGDRRRTVMRPPQVLREGTKKTVFVNFMDLCKTMHRQPDHVMAFLLAELGTSGSLDGQQRLVVKGRFAPKNFEGILRRYVNEYVICLGCKSPDTILSKENRLFFLRCEKCGSGRTVAPIKAGFVARVGRRNAGT	269.08	AT5G20920.2	1e-135	EIF2 BETA	eukaryotic translation initiation factor 2 beta subunit			eukaryotic translation initiation factor 2 subunit beta
LOC18775083	PRUPE_6G340700	ATGGCCGTCGGTAAGAACAAGAGGATTTCGAAGGGTAAGAAGGGTGGGAAGAAGAAGGCAGCTGACCCATTTGCCAAGAAGGACTGGTATGATATCAAGGCTCCTTCTCTCTTCACAGAAAGGCAGATTGGCAAAACCCTCGTCTCCAGAACTCAGGGCACTAAGATTGCTTCTGAAGGACTCAAGCATCGAGTGTTTGAGGTTTCTCTGGCTGATCTCCAGAAGGATGAGGAGCATGCTTACAGGAAGATCCGGCTAAGAGCGGAGGATGTGCAAGGGAGGAACGTACTCACTAACTTCTGGGGAATGGATTTCACCACCGACAAGCTGAGGTCGTTAGTGAGGAAGTGGCAGACACTGATTGAGGCTCATGTGGATGTAAAGACTACTGATAACTAC…	MAVGKNKRISKGKKGGKKKAADPFAKKDWYDIKAPSLFTERQIGKTLVSRTQGTKIASEGLKHRVFEVSLADLQKDEEHAYRKIRLRAEDVQGRNVLTNFWGMDFTTDKLRSLVRKWQTLIEAHVDVKTTDNYTLRMFCIAFTKRRTNQVKRTCYAQSSQIRQIRLKMREIMINQAASCDLKDLVAKFIPESIGREIEKATSSIYPLQNVFIRKVKILKAPKFDLPKLMEVHGGKEDVGVKVDRSAEETAPEGETEVVGV	261.713	AT3G04840.1	9e-157		Ribosomal protein S3Ae			40S ribosomal protein S3a-2
LOC18775119	PRUPE_6G069700	ATGGGTAGCAGAGACAGAGAGAGAAGATGGTCTCTTGAGGGATTGACTGCTCTTGTTACTGGAGGAACCAAAGGGATTGGGCACGCTATAGTGGAAGAATTGGCAGGGCTAGGTGCAACTATTCATACTTGTGCTCGGAATGAAGTTGATCTCAATGACTGCTTGAGCCAATGGGAGAAGAAGGGTTTTCAAGTCACTGGTTCAGTGTGTGATGTGGTGTCAAGAGCCCAAAGAGAGGAGCTTATAAACAAAGTCTCATCTTTGTTTGATGGAAAACTTAACATCCTTATAAACAATGTGGGAACAAGCATACTAAAACCAACGATGGAGTTCACAGCTGAAGATTATACCTTTCTTATGAGTACCAATCTTGAATCTGCTTATCACTTCTGCCAACTT…	MGSRDRERRWSLEGLTALVTGGTKGIGHAIVEELAGLGATIHTCARNEVDLNDCLSQWEKKGFQVTGSVCDVVSRAQREELINKVSSLFDGKLNILINNVGTSILKPTMEFTAEDYTFLMSTNLESAYHFCQLAHPLLKASGAGNIVFLSSVAGVVSVEVGSAYSATKGAINQLAKNLACEWAKDNIRINSVAPWFIKTPLAEHFLSDEFFLKIINSRTPLGRPGEPEEVSALVAFLCLPAASYITGQTICVDGGMTVNGLLFQGA	752.947	AT1G07440.1	6e-137		NAD(P)-binding Rossmann-fold superfamily protein			tropinone reductase homolog At1g07440
LOC18775159	PRUPE_6G186600	ATGGCGACTCTCAGAGTACCAGATGTGGTTCCTTCTCCAGTGGAAGATGCTGAACAACTCCGCAAAGCTTTTGAAGGATGGGGGACAAATGAGGCGTTGATCATTTCGATATTGACTCACAGGAATGCAGCTCAGAGAAAATTAATTCAGCAGGCATATGCAGAAACTTATGGGGAAGAGCTTCTTAAGTCACTGGACAAAGAGCTCTCAAGTGAATTTGAGAGGGCTGTGCTGCTGTGGACACTGGTCCCTGCTGAGCGTGATGCATTTTTGGCTAATGAAGCTACAAAGAGGTTCACTTCAAGCAACAAAGTGCTCTTGGAAATAGCTACTACTAGGTCTTCCCATGACCTGTTGCTGGTAAAGCAGGCGTATCATGCGCGTTTCAAGAAATCCCTT…	MATLRVPDVVPSPVEDAEQLRKAFEGWGTNEALIISILTHRNAAQRKLIQQAYAETYGEELLKSLDKELSSEFERAVLLWTLVPAERDAFLANEATKRFTSSNKVLLEIATTRSSHDLLLVKQAYHARFKKSLEEDVAYHTSGDLRKLLVPLLSTYRYEGDEISVPLAKKEAKILHEKISDKAYNDEELIRILSTRSKAQLNATLNHYNNEFGNAINKDLKADKDDEFLLLLRQTIKSLTVPEKYFEKVLRLAINKLGTDEGALTRVVTTRAEVDLHRIKQEYHRRNSVPLDQAIVKDTSGDYEKFLVELVGHGDA	643.783	AT5G65020.1	7e-165	ANNAT2	annexin 2			annexin D2
LOC18775188	PRUPE_6G018000	ATGTCAAACTGTACGGTCGAGACCTGCACAGTTGAGACCAGTGATGGAGTCAAACTCAGCACAAGGCTCTTCAAACCAAGAGAAGAGATCAACAAGGGAAATCCTGTAGTGGTTCTGGTGCACCCATACTCAGTCTTGGGTGGTTGCCAAGGCCTATTGAGAGGTATAGCAGCTGGGTTGGCAGATAGAGGCTACAAAGCTGTGACCTTTGACATGAGAGGGGTTGGGAGGTCAACAGGGAGGGCTTCTCTTACTGGGTTTGCAGAAATCAAGGATGTGATTGCTGTGTGCAAATGGGTCTGTGAGAATCTCTCTGCTGACAGAATTTTGTTGGTGGGTTCTTCTGCAGGTGCCCCAATTGCAGGCTCTGCAGTAGATCAGATTGAACAAGTTGTGGGT…	MSNCTVETCTVETSDGVKLSTRLFKPREEINKGNPVVVLVHPYSVLGGCQGLLRGIAAGLADRGYKAVTFDMRGVGRSTGRASLTGFAEIKDVIAVCKWVCENLSADRILLVGSSAGAPIAGSAVDQIEQVVGYVSLGYPFGMIASILFGRHHKAVLQSPKPKIFIMGTKDGFTSVQQLKNKLRSAAGRVETHLIEGVSHFQMEGPAYDAQMVNLILEFIASL	204.453	AT5G19630.1	8e-122		alpha/beta-Hydrolases superfamily protein			uncharacterized protein RP471
LOC18775191	PRUPE_6G280900	ATGCACATTTCCCACACATTTCTCAAAAACCATCCACCGGTAAGAGAAGCTTCCGGTAGAAGAAGTGACCGTTGGTTTCAAGCCGTTGATTCGAAGAGTGACAGAGTCTCACTGAAAATGGATATTGACGAAACAGCCAAAGAAATTCCTGTGCTAAAAGGCGAAGAAAAGCATGGAAAGCCAATCGTGGTAATATTGATGGGCGCACCTGGAAGCGGCAAGTCCACCTTCTGTGAACATGTCATGCGCTCCTCTACCCGTCCCTGGGTTCGCGTCTGTCAGGACACTATCAAAAGTGGTAAAGCTGGAACCAAAGCTCAGTGTATAGATAGTGCAATCAATGCATTGAAGGATGGGAAGAGTGTGTTTATAGATAGATGCAATCTAGAGATAGAACAA…	MHISHTFLKNHPPVREASGRRSDRWFQAVDSKSDRVSLKMDIDETAKEIPVLKGEEKHGKPIVVILMGAPGSGKSTFCEHVMRSSTRPWVRVCQDTIKSGKAGTKAQCIDSAINALKDGKSVFIDRCNLEIEQRNEFVKLGGPQVDVHAVVLDLPAKLCITRSVKRTGHEGNLQGGRAAAVVNRLLQKKELPKLSEGFARITSCQNESDVQSAIDAYSGLGPLDTLPNGYFGQKNPGAKIQLGIMKFLKKTDAPASSESISKSIPDSNASQITEEKDACLKGTGSLSENAGRELKEGEEPVVGSAGGDVSLKDAPTLAFPSISTADFQFDLEKASDIIVDKVAKFVNKLGNARLVLVDLSHKSKILSLVRTKASEKNIDSNKFFTFVGDITRLHSEGGL…	234.818	AT5G01310.1	0	APTX	APRATAXIN-like			transcription factor bHLH140
LOC18775217	PRUPE_6G119600	ATGAGGTTGGAAAAATGCTGGTTTTGCTCCTCTACAGTATATCCTGGACATGGGATTCAGTTTGTTCGTAATGATGCAAAGATTTTTCGATTCTGTAGGTCCAAATGCCACAAGAACTTTAAAATGAAGAGGAATCCTCGCAAAGTAAAATGGACTAAGGCCTATAGGCGTTTGCGTGGAAAGGATATGACACAGGACTCAACTTTTGAGTTTGAGAGAAAGAGAAATAGGCCCGAGAGATATGACAGAAATCTCACAGAAAACACCCTCAAGGCCATTAAGAAGATCGACAAAGTCAGAATCATCAGAGAGGAAAGACACCATGAGAAGAGGATGAAGGGCAAGAAAGCCAAGGAGAACAGAGAGGCAGTAAAAGAGTTGGAACAGAGCATCAGCTTG…	MRLEKCWFCSSTVYPGHGIQFVRNDAKIFRFCRSKCHKNFKMKRNPRKVKWTKAYRRLRGKDMTQDSTFEFERKRNRPERYDRNLTENTLKAIKKIDKVRIIREERHHEKRMKGKKAKENREAVKELEQSISLVKAPTALQQDPSLTLPIKVKVSQQQPEKTVAMME	213.877	AT2G44860.2	5e-77		Ribosomal protein L24e family protein			probable ribosome biogenesis protein RLP24
LOC18775219	PRUPE_6G028500	ATGTTGCAGTGCATAGAGGGGTTAAAGCATTTATGTGCTTCCCTACTGAGGTGCTGTGATCTTGAGTTGTACAAGCAATCAAGAGGCTTAGAAGACCCTGAAATTCTAGCAAGGGAGACAGTGTTCAGCGTGAGTGAAATAGAGGCACTATATGAGCTATTTAAGAAGATTAGCAGTGCAGTGATTGATGATGGATTGATTAACAAGGAGGAGTTTCAACTGGCATTATTCAAGACAAACAAGAAAGAGAGCTTGTTTGCTGATCGTGTATTTGACTTGTTTGACACAAAGCACAATGGAATACTAGGTTTTGAAGAGTTTGCACGAGCCCTCTCTGTCTTTCATCCTAACGCCCCAATTGACGATAAGATTGAGTTTTCTTTTCAATTATATGACCTC…	MLQCIEGLKHLCASLLRCCDLELYKQSRGLEDPEILARETVFSVSEIEALYELFKKISSAVIDDGLINKEEFQLALFKTNKKESLFADRVFDLFDTKHNGILGFEEFARALSVFHPNAPIDDKIEFSFQLYDLKQQGFIERQEVKQMVVATLAESGMNLSDDVIESIIDKTFEEADTKHDGRIDKEEWRSLVLRHPSLLKNMTLQYLKDITTTFPSFVFHSQVDDT	231.098	AT4G26570.1	5e-153	ATCBL3, CBL3	calcineurin B-like 3			calcineurin B-like protein 3
LOC18775245	PRUPE_6G082200	ATGGCTAATGCAGCGTCGGGATTTGCTGTGGATGATGACTGCAAGCTGAAGTTTCTGGAATTGAAGGCTAAAAGAACGTACCGCTTCATAGTATTCAAGATTGAGGAGGAGCAAAAGCAGGTGATTGTGGAGAAACTTGGCGAGCCAGCTGAAAGCTATGAAAACTTTACTGCAAGCCTTCCCGCTGATGAATGCAGATATGCTGTCTATGATTTTGACTTTGTGACTGAGGAGAATTGTCAGAAAAGCAGGATTTTCTTCATTGCATGGTCTCCTGATACATCAAGGGTGAGAAGCAAGATGATTTATGCAAGCTCCAAGGACAGGTTCAAGAGAGAACTGGATGGTATACAAGTAGAGCTGCAGGCTACTGATCCGACTGAGATTGGTCTTGATGTT…	MANAASGFAVDDDCKLKFLELKAKRTYRFIVFKIEEEQKQVIVEKLGEPAESYENFTASLPADECRYAVYDFDFVTEENCQKSRIFFIAWSPDTSRVRSKMIYASSKDRFKRELDGIQVELQATDPTEIGLDVIKSRAS	392.785	AT5G59890.1	7e-84	ADF4, ATADF4	actin depolymerizing factor 4			actin-depolymerizing factor 2
LOC18775261	PRUPE_6G231300	ATGTCTGGAGGCATAGCTCGTGGTCGTCTTGCCGAGGAGCGGAAGGCCTGGCGGAAGAACCACCCTCATGGTTTTGTTGCGAAGCCGGAGACTTTATCTGATGGGACGGTGAATTTGATGGTGTGGCATTGCACGATTCCTGGCAAGACCGGTACTGACTGGGAGGGGGGGTTTTTCCCACTTACCCTTCACTTCAGTGAAGACTACCCTAGCAAGCCTCCAAAGTGTAAATTCCCACCAGGTTTCTTCCACCCAAATGTATATCCATCTGGAACTGTTTGTCTATCAATTCTTAATGAGGACAGTGGTTGGAGACCAGCAATAACCGTGAAGCAAATTCTTGTGGGCATTCAGGATTTACTGGATCAGCCAAATCCTGCTGATCCTGCACAGACAGAA…	MSGGIARGRLAEERKAWRKNHPHGFVAKPETLSDGTVNLMVWHCTIPGKTGTDWEGGFFPLTLHFSEDYPSKPPKCKFPPGFFHPNVYPSGTVCLSILNEDSGWRPAITVKQILVGIQDLLDQPNPADPAQTEGYHLFIQDATEYKKRVRQQAKQYPPLV	234.447	AT3G57870.1	2e-105	AHUS5, EMB1637, SCE1, SCE1A, ATSCE1	sumo conjugation enzyme 1			SUMO-conjugating enzyme SCE1
LOC18775262	PRUPE_6G083500	ATGGCGCCGAAAGCTGAGAAGAAGCCCGCCGAGAAGAAGCCAGCGGAGGAGAAGAAGTCGACTGTGGCTGAGAAAGCCCCGGCCGAGAAGAAGCCCAAGGCCGGCAAGAAGCTCCCCAAGGAGGCCGGAGCCGCCGCCGGAGATAAGAAGAAGAAGAGATCGAAGAAGAGCGTAGAGACCTACAAGATCTATATCTTCAAGGTGCTGAAGCAGGTTCACCCTGATATTGGGATCTCCAGCAAGGCCATGGGCATCATGAACAGCTTCATCAACGACATCTTTGAGAAGCTCGCCCAGGAGTCTTCCAGGCTTGCAAGGTACAACAAGAAGCCGACCATTACTTCTCGGGAGATCCAGACTGCTGTGAGGCTTGTGCTTCCTGGTGAGCTCGCTAAGCAC…	MAPKAEKKPAEKKPAEEKKSTVAEKAPAEKKPKAGKKLPKEAGAAAGDKKKKRSKKSVETYKIYIFKVLKQVHPDIGISSKAMGIMNSFINDIFEKLAQESSRLARYNKKPTITSREIQTAVRLVLPGELAKHAVSEGTKAVTKFTSS	597.382	AT3G45980.1	1e-83	H2B, HTB9	Histone superfamily protein			probable histone H2B.1
LOC18775277	PRUPE_6G054200	ATGTCGAGCGCCGATGCCGAGCACAGAGAAGACGAGGAGGCCCCACTAGCCGGCGACGACGAGGACACCGGAGCTCAGGTCGCTCCGATCGTCAGGCTCGAGGAGGTCGCCGTCACCACCGGTGAGGAAGACGAAGACGCCATCCTCGATCTGAAAGCGAAGCTATACCGATTTGATAAAGACGGTAACCAATGGAAAGAGCGAGGTGCTGGTACTGTCAAGCTTCTTAAGCACAATAAGACTGGCAAGGTCCGCCTTGTTATGCGACAGTCCAAAACCCTAAAGATCTGCGCCAATCACCTCGTTCTACCGAAGATGACAGTTCAGGAGCATGCCGGTAATGAGAAGTCATCTGTTTGGCACGCAACTGATTTTGCTGATGGGGAATTGAAGGAGGAG…	MSSADAEHREDEEAPLAGDDEDTGAQVAPIVRLEEVAVTTGEEDEDAILDLKAKLYRFDKDGNQWKERGAGTVKLLKHNKTGKVRLVMRQSKTLKICANHLVLPKMTVQEHAGNEKSSVWHATDFADGELKEELFCIRFASIENNRLFMEKFQEIAESLSTEEENEDATEAAGLLKNLSVEERKTKEKAEEEAPAATKSGTVKEDAPAEEKVEEKAEGKVPAAAEEEKKDT	2061.22	AT5G58590.1	3e-95	RANBP1	RAN binding protein 1			ran-binding protein 1 homolog c
LOC18775279	PRUPE_6G314600	ATGGCTGACGTGGCAGAAAGCGAGCGGAGGATCCTCGTGGCCGTCGATGAAGGAGAGGAGAGCATGCATGCTCTCTCTTGGTGCCTCAAGAACGTTGTTTCTCAGAATTCCAAAGATACCCTTATCCTACTCTACGCCAAGCCCCCGAGAGCTGTGTACACGGCTCTAGATGGCACAGGGTATTTGTTTTCCTCGGATATTTTGGCGGCGATGGAGAAGTACGGCGCTGAGGTGGCGGCCTGCGTGATCGAGAAGGCCAAGAAGATGTGCAAAGACCTTCAGCAGGATGTTAAGGTGGAGACGCGAGTAGAGAACGGTGATCCGAGGGATGTGATTTGCCAGATGGCAGAGCAGCTTGGTGCTGACGTGTTGGTCATGGGAAGCCATGGCTATGGTCTC…	MADVAESERRILVAVDEGEESMHALSWCLKNVVSQNSKDTLILLYAKPPRAVYTALDGTGYLFSSDILAAMEKYGAEVAACVIEKAKKMCKDLQQDVKVETRVENGDPRDVICQMAEQLGADVLVMGSHGYGLIKRAFLGSVSNHCAQNVKCPVLIVKKPKTNAFSK	302.709	AT3G62550.1	3e-54		Adenine nucleotide alpha hydrolases-like superfamily protein			universal stress protein A-like protein
[truncated: 679 more rows]
