# Supplementary material for: Screening of MYB1R1 interaction with LDOX promoter to regulate anthocyanin biosynthesis in peaches
Source: PeerJ. 2025 Sep 4;13:e19975. doi: 10.7717/peerj.19975 (PMC12422263; doi:10.7717/peerj.19975)
Supplement: Supplemental Information 4 [file peerj-13-19975-s004.xlsx]

## Sheet: Sheet1
pattern name	#pattern name	Family
Prupe.1G084900.1.p	Prupe_1G084900	AP2
Prupe.1G101600.1.p	Prupe_1G101600	AP2
Prupe.1G268800.1.p	Prupe_1G268800	AP2
Prupe.1G418600.1.p	Prupe_1G418600	AP2
Prupe.2G060200.1.p	Prupe_2G060200	AP2
Prupe.3G042000.1.p	Prupe_3G042000	AP2
Prupe.3G104100.1.p	Prupe_3G104100	AP2
Prupe.3G271200.1.p	Prupe_3G271200	AP2
Prupe.3G271400.1.p	Prupe_3G271400	AP2
Prupe.6G023000.1.p	Prupe_6G023000	AP2
Prupe.6G091100.1.p	Prupe_6G091100	AP2
Prupe.6G091100.2.p	Prupe_6G091100	AP2
Prupe.6G203000.1.p	Prupe_6G203000	AP2
Prupe.6G216400.1.p	Prupe_6G216400	AP2
Prupe.6G216400.2.p	Prupe_6G216400	AP2
Prupe.6G216400.3.p	Prupe_6G216400	AP2
Prupe.6G231700.1.p	Prupe_6G231700	AP2
Prupe.6G231700.2.p	Prupe_6G231700	AP2
Prupe.6G242400.1.p	Prupe_6G242400	AP2
Prupe.6G364100.1.p	Prupe_6G364100	AP2
Prupe.7G069100.1.p	Prupe_7G069100	AP2
Prupe.7G058300.1.p	Prupe_7G058300	AP2
Prupe.6G242400.2.p	Prupe_6G242400	AP2
Prupe.6G091100.3.p	Prupe_6G091100	AP2
Prupe.2G220100.1.p	Prupe_2G220100	AP2
Prupe.1G065300.1.p	Prupe_1G065300	ARF
Prupe.1G065300.2.p	Prupe_1G065300	ARF
Prupe.1G368300.1.p	Prupe_1G368300	ARF
Prupe.1G507000.1.p	Prupe_1G507000	ARF
Prupe.1G585200.1.p	Prupe_1G585200	ARF
Prupe.1G585200.2.p	Prupe_1G585200	ARF
Prupe.2G190400.1.p	Prupe_2G190400	ARF
Prupe.2G190400.2.p	Prupe_2G190400	ARF
Prupe.2G190400.3.p	Prupe_2G190400	ARF
Prupe.2G213000.1.p	Prupe_2G213000	ARF
Prupe.2G213000.2.p	Prupe_2G213000	ARF
Prupe.3G011800.1.p	Prupe_3G011800	ARF
Prupe.3G182900.1.p	Prupe_3G182900	ARF
Prupe.3G182900.2.p	Prupe_3G182900	ARF
Prupe.3G182900.3.p	Prupe_3G182900	ARF
Prupe.3G182900.4.p	Prupe_3G182900	ARF
Prupe.3G182900.5.p	Prupe_3G182900	ARF
Prupe.4G053800.1.p	Prupe_4G053800	ARF
Prupe.4G053800.2.p	Prupe_4G053800	ARF
Prupe.4G053800.3.p	Prupe_4G053800	ARF
Prupe.4G085900.1.p	Prupe_4G085900	ARF
Prupe.4G085900.2.p	Prupe_4G085900	ARF
Prupe.5G123400.1.p	Prupe_5G123400	ARF
Prupe.5G143100.1.p	Prupe_5G143100	ARF
Prupe.5G143100.2.p	Prupe_5G143100	ARF
Prupe.5G143100.3.p	Prupe_5G143100	ARF
Prupe.6G097700.1.p	Prupe_6G097700	ARF
Prupe.6G097700.2.p	Prupe_6G097700	ARF
Prupe.6G097700.3.p	Prupe_6G097700	ARF
Prupe.6G097700.4.p	Prupe_6G097700	ARF
Prupe.6G097700.5.p	Prupe_6G097700	ARF
Prupe.6G102800.1.p	Prupe_6G102800	ARF
Prupe.6G102800.2.p	Prupe_6G102800	ARF
Prupe.6G102800.3.p	Prupe_6G102800	ARF
Prupe.6G236200.1.p	Prupe_6G236200	ARF
Prupe.6G236200.2.p	Prupe_6G236200	ARF
Prupe.6G236200.3.p	Prupe_6G236200	ARF
Prupe.7G194200.1.p	Prupe_7G194200	ARF
Prupe.7G194200.2.p	Prupe_7G194200	ARF
Prupe.8G252300.1.p	Prupe_8G252300	ARF
Prupe.1G126400.1.p	Prupe_1G126400	ARR-B
Prupe.1G126400.2.p	Prupe_1G126400	ARR-B
Prupe.1G238200.1.p	Prupe_1G238200	ARR-B
Prupe.1G238200.2.p	Prupe_1G238200	ARR-B
Prupe.1G238200.3.p	Prupe_1G238200	ARR-B
Prupe.1G317900.1.p	Prupe_1G317900	ARR-B
Prupe.1G334200.1.p	Prupe_1G334200	ARR-B
Prupe.1G391400.1.p	Prupe_1G391400	ARR-B
Prupe.2G154100.1.p	Prupe_2G154100	ARR-B
Prupe.2G289800.1.p	Prupe_2G289800	ARR-B
Prupe.5G045000.1.p	Prupe_5G045000	ARR-B
Prupe.5G045000.2.p	Prupe_5G045000	ARR-B
Prupe.5G045000.3.p	Prupe_5G045000	ARR-B
Prupe.7G259300.1.p	Prupe_7G259300	ARR-B
Prupe.1G388000.1.p	Prupe_1G388000	B3
Prupe.1G388000.2.p	Prupe_1G388000	B3
Prupe.1G388100.1.p	Prupe_1G388100	B3
Prupe.1G388200.1.p	Prupe_1G388200	B3
Prupe.1G388200.2.p	Prupe_1G388200	B3
Prupe.1G388300.1.p	Prupe_1G388300	B3
Prupe.1G437800.1.p	Prupe_1G437800	B3
Prupe.1G437900.1.p	Prupe_1G437900	B3
Prupe.1G438000.1.p	Prupe_1G438000	B3
Prupe.1G489700.1.p	Prupe_1G489700	B3
Prupe.1G517200.1.p	Prupe_1G517200	B3
Prupe.1G519100.1.p	Prupe_1G519100	B3
Prupe.1G539700.1.p	Prupe_1G539700	B3
Prupe.1G574300.1.p	Prupe_1G574300	B3
Prupe.1G574400.1.p	Prupe_1G574400	B3
Prupe.1G579400.1.p	Prupe_1G579400	B3
Prupe.1G579400.2.p	Prupe_1G579400	B3
Prupe.1G579400.3.p	Prupe_1G579400	B3
Prupe.1G579400.4.p	Prupe_1G579400	B3
Prupe.2G100300.1.p	Prupe_2G100300	B3
Prupe.2G100300.2.p	Prupe_2G100300	B3
Prupe.2G100300.3.p	Prupe_2G100300	B3
Prupe.2G100300.4.p	Prupe_2G100300	B3
Prupe.2G104700.1.p	Prupe_2G104700	B3
Prupe.2G104700.2.p	Prupe_2G104700	B3
Prupe.2G104700.3.p	Prupe_2G104700	B3
Prupe.2G201000.1.p	Prupe_2G201000	B3
Prupe.2G201000.2.p	Prupe_2G201000	B3
Prupe.2G201000.3.p	Prupe_2G201000	B3
Prupe.2G278500.1.p	Prupe_2G278500	B3
Prupe.3G083400.1.p	Prupe_3G083400	B3
Prupe.3G312100.1.p	Prupe_3G312100	B3
Prupe.4G036100.1.p	Prupe_4G036100	B3
Prupe.4G049500.1.p	Prupe_4G049500	B3
Prupe.4G049500.2.p	Prupe_4G049500	B3
Prupe.4G049500.3.p	Prupe_4G049500	B3
Prupe.4G178000.1.p	Prupe_4G178000	B3
Prupe.4G178100.1.p	Prupe_4G178100	B3
Prupe.4G178100.2.p	Prupe_4G178100	B3
Prupe.4G178200.1.p	Prupe_4G178200	B3
Prupe.4G178300.1.p	Prupe_4G178300	B3
Prupe.4G178400.1.p	Prupe_4G178400	B3
Prupe.4G178500.1.p	Prupe_4G178500	B3
Prupe.4G190000.1.p	Prupe_4G190000	B3
Prupe.4G190000.2.p	Prupe_4G190000	B3
Prupe.4G190000.3.p	Prupe_4G190000	B3
Prupe.4G190000.4.p	Prupe_4G190000	B3
Prupe.4G206300.1.p	Prupe_4G206300	B3
Prupe.4G206300.2.p	Prupe_4G206300	B3
Prupe.4G206800.1.p	Prupe_4G206800	B3
Prupe.4G206900.1.p	Prupe_4G206900	B3
Prupe.4G207000.1.p	Prupe_4G207000	B3
Prupe.5G134900.1.p	Prupe_5G134900	B3
Prupe.5G157600.10.p	Prupe_5G157600	B3
Prupe.5G157600.11.p	Prupe_5G157600	B3
Prupe.5G157600.12.p	Prupe_5G157600	B3
Prupe.5G157600.13.p	Prupe_5G157600	B3
Prupe.5G157600.14.p	Prupe_5G157600	B3
Prupe.5G157600.1.p	Prupe_5G157600	B3
Prupe.5G157600.3.p	Prupe_5G157600	B3
Prupe.5G157600.5.p	Prupe_5G157600	B3
Prupe.5G157600.7.p	Prupe_5G157600	B3
Prupe.5G157600.9.p	Prupe_5G157600	B3
Prupe.6G038900.1.p	Prupe_6G038900	B3
Prupe.6G038900.2.p	Prupe_6G038900	B3
Prupe.6G041000.1.p	Prupe_6G041000	B3
Prupe.6G041000.2.p	Prupe_6G041000	B3
Prupe.6G041000.3.p	Prupe_6G041000	B3
Prupe.6G229600.1.p	Prupe_6G229600	B3
Prupe.6G293400.10.p	Prupe_6G293400	B3
Prupe.6G293400.11.p	Prupe_6G293400	B3
Prupe.6G293400.12.p	Prupe_6G293400	B3
Prupe.6G293400.13.p	Prupe_6G293400	B3
Prupe.6G293400.14.p	Prupe_6G293400	B3
Prupe.6G293400.15.p	Prupe_6G293400	B3
Prupe.6G293400.16.p	Prupe_6G293400	B3
Prupe.6G293400.17.p	Prupe_6G293400	B3
Prupe.6G293400.18.p	Prupe_6G293400	B3
Prupe.6G293400.1.p	Prupe_6G293400	B3
Prupe.6G293400.2.p	Prupe_6G293400	B3
Prupe.6G293400.3.p	Prupe_6G293400	B3
Prupe.6G293400.4.p	Prupe_6G293400	B3
Prupe.6G293400.5.p	Prupe_6G293400	B3
Prupe.6G293400.6.p	Prupe_6G293400	B3
Prupe.6G293400.7.p	Prupe_6G293400	B3
Prupe.6G293400.8.p	Prupe_6G293400	B3
Prupe.6G293400.9.p	Prupe_6G293400	B3
Prupe.7G039600.1.p	Prupe_7G039600	B3
Prupe.7G044500.1.p	Prupe_7G044500	B3
Prupe.7G044800.1.p	Prupe_7G044800	B3
Prupe.7G064600.1.p	Prupe_7G064600	B3
Prupe.7G064600.2.p	Prupe_7G064600	B3
Prupe.7G100600.1.p	Prupe_7G100600	B3
Prupe.7G134800.1.p	Prupe_7G134800	B3
Prupe.7G143100.1.p	Prupe_7G143100	B3
Prupe.7G143300.1.p	Prupe_7G143300	B3
Prupe.7G143400.1.p	Prupe_7G143400	B3
Prupe.7G143500.1.p	Prupe_7G143500	B3
Prupe.7G143600.1.p	Prupe_7G143600	B3
Prupe.7G143700.1.p	Prupe_7G143700	B3
Prupe.7G143800.1.p	Prupe_7G143800	B3
Prupe.7G143900.1.p	Prupe_7G143900	B3
Prupe.7G143900.2.p	Prupe_7G143900	B3
Prupe.7G143900.3.p	Prupe_7G143900	B3
Prupe.7G143900.4.p	Prupe_7G143900	B3
Prupe.7G144000.1.p	Prupe_7G144000	B3
Prupe.7G144100.1.p	Prupe_7G144100	B3
Prupe.7G144100.2.p	Prupe_7G144100	B3
Prupe.7G144200.1.p	Prupe_7G144200	B3
Prupe.7G223800.1.p	Prupe_7G223800	B3
Prupe.7G223900.1.p	Prupe_7G223900	B3
Prupe.7G224000.1.p	Prupe_7G224000	B3
Prupe.8G072800.1.p	Prupe_8G072800	B3
Prupe.8G072800.2.p	Prupe_8G072800	B3
Prupe.8G113000.1.p	Prupe_8G113000	B3
Prupe.8G113000.2.p	Prupe_8G113000	B3
Prupe.8G113000.3.p	Prupe_8G113000	B3
Prupe.8G113000.4.p	Prupe_8G113000	B3
Prupe.8G113000.5.p	Prupe_8G113000	B3
Prupe.8G113100.1.p	Prupe_8G113100	B3
Prupe.8G122500.1.p	Prupe_8G122500	B3
Prupe.8G122500.2.p	Prupe_8G122500	B3
Prupe.8G122500.3.p	Prupe_8G122500	B3
Prupe.8G122600.1.p	Prupe_8G122600	B3
Prupe.8G122700.1.p	Prupe_8G122700	B3
Prupe.8G122700.2.p	Prupe_8G122700	B3
Prupe.8G122700.3.p	Prupe_8G122700	B3
Prupe.8G122800.1.p	Prupe_8G122800	B3
Prupe.8G122800.2.p	Prupe_8G122800	B3
Prupe.8G122800.3.p	Prupe_8G122800	B3
Prupe.8G122800.4.p	Prupe_8G122800	B3
Prupe.8G132600.1.p	Prupe_8G132600	B3
Prupe.8G207700.1.p	Prupe_8G207700	B3
Prupe.8G207700.2.p	Prupe_8G207700	B3
Prupe.8G207700.3.p	Prupe_8G207700	B3
Prupe.8G207700.4.p	Prupe_8G207700	B3
Prupe.8G207700.5.p	Prupe_8G207700	B3
Prupe.8G207700.6.p	Prupe_8G207700	B3
Prupe.8G260200.10.p	Prupe_8G260200	B3
Prupe.8G260200.1.p	Prupe_8G260200	B3
Prupe.8G260200.2.p	Prupe_8G260200	B3
Prupe.8G260200.3.p	Prupe_8G260200	B3
Prupe.8G260200.4.p	Prupe_8G260200	B3
Prupe.8G260200.5.p	Prupe_8G260200	B3
Prupe.8G260200.6.p	Prupe_8G260200	B3
Prupe.8G260200.7.p	Prupe_8G260200	B3
Prupe.8G260200.8.p	Prupe_8G260200	B3
Prupe.8G260200.9.p	Prupe_8G260200	B3
Prupe.1G338500.1.p	Prupe_1G338500	BBR-BPC
Prupe.1G338500.2.p	Prupe_1G338500	BBR-BPC
Prupe.1G369400.1.p	Prupe_1G369400	BBR-BPC
Prupe.1G369400.2.p	Prupe_1G369400	BBR-BPC
Prupe.1G369400.3.p	Prupe_1G369400	BBR-BPC
Prupe.8G082900.1.p	Prupe_8G082900	BBR-BPC
Prupe.8G082900.2.p	Prupe_8G082900	BBR-BPC
Prupe.8G082900.3.p	Prupe_8G082900	BBR-BPC
Prupe.8G082900.4.p	Prupe_8G082900	BBR-BPC
Prupe.8G082900.5.p	Prupe_8G082900	BBR-BPC
Prupe.8G082900.6.p	Prupe_8G082900	BBR-BPC
Prupe.8G082900.7.p	Prupe_8G082900	BBR-BPC
Prupe.8G082900.8.p	Prupe_8G082900	BBR-BPC
Prupe.1G382900.1.p	Prupe_1G382900	BES1
Prupe.2G169900.1.p	Prupe_2G169900	BES1
Prupe.2G169900.2.p	Prupe_2G169900	BES1
Prupe.4G068200.1.p	Prupe_4G068200	BES1
Prupe.4G068200.2.p	Prupe_4G068200	BES1
Prupe.4G068200.3.p	Prupe_4G068200	BES1
Prupe.4G068200.4.p	Prupe_4G068200	BES1
Prupe.4G068200.5.p	Prupe_4G068200	BES1
Prupe.4G068200.6.p	Prupe_4G068200	BES1
Prupe.4G089900.1.p	Prupe_4G089900	BES1
Prupe.4G158400.1.p	Prupe_4G158400	BES1
Prupe.5G013400.1.p	Prupe_5G013400	BES1
Prupe.5G013400.2.p	Prupe_5G013400	BES1
Prupe.5G013400.3.p	Prupe_5G013400	BES1
Prupe.5G013400.4.p	Prupe_5G013400	BES1
Prupe.5G013400.5.p	Prupe_5G013400	BES1
Prupe.7G149000.1.p	Prupe_7G149000	BES1
Prupe.1G006600.1.p	Prupe_1G006600	bHLH
Prupe.1G006600.2.p	Prupe_1G006600	bHLH
Prupe.1G006600.3.p	Prupe_1G006600	bHLH
Prupe.1G030500.1.p	Prupe_1G030500	bHLH
Prupe.1G037400.1.p	Prupe_1G037400	bHLH
Prupe.1G074400.1.p	Prupe_1G074400	bHLH
Prupe.1G074400.2.p	Prupe_1G074400	bHLH
Prupe.1G151800.1.p	Prupe_1G151800	bHLH
Prupe.1G173300.1.p	Prupe_1G173300	bHLH
Prupe.1G173300.2.p	Prupe_1G173300	bHLH
Prupe.1G181300.1.p	Prupe_1G181300	bHLH
Prupe.1G181300.2.p	Prupe_1G181300	bHLH
Prupe.1G207100.1.p	Prupe_1G207100	bHLH
Prupe.1G207100.2.p	Prupe_1G207100	bHLH
Prupe.1G213700.1.p	Prupe_1G213700	bHLH
Prupe.1G217700.1.p	Prupe_1G217700	bHLH
Prupe.1G217700.2.p	Prupe_1G217700	bHLH
Prupe.1G252600.1.p	Prupe_1G252600	bHLH
Prupe.1G263800.1.p	Prupe_1G263800	bHLH
Prupe.1G271700.1.p	Prupe_1G271700	bHLH
Prupe.1G294200.1.p	Prupe_1G294200	bHLH
Prupe.1G294200.2.p	Prupe_1G294200	bHLH
Prupe.1G297200.10.p	Prupe_1G297200	bHLH
Prupe.1G297200.11.p	Prupe_1G297200	bHLH
Prupe.1G297200.12.p	Prupe_1G297200	bHLH
Prupe.1G297200.13.p	Prupe_1G297200	bHLH
Prupe.1G297200.14.p	Prupe_1G297200	bHLH
Prupe.1G297200.15.p	Prupe_1G297200	bHLH
Prupe.1G297200.16.p	Prupe_1G297200	bHLH
Prupe.1G297200.1.p	Prupe_1G297200	bHLH
Prupe.1G297200.2.p	Prupe_1G297200	bHLH
Prupe.1G297200.3.p	Prupe_1G297200	bHLH
Prupe.1G297200.4.p	Prupe_1G297200	bHLH
Prupe.1G297200.5.p	Prupe_1G297200	bHLH
Prupe.1G297200.6.p	Prupe_1G297200	bHLH
Prupe.1G297200.7.p	Prupe_1G297200	bHLH
Prupe.1G297200.8.p	Prupe_1G297200	bHLH
Prupe.1G297200.9.p	Prupe_1G297200	bHLH
Prupe.1G304900.1.p	Prupe_1G304900	bHLH
Prupe.1G313200.1.p	Prupe_1G313200	bHLH
Prupe.1G313200.2.p	Prupe_1G313200	bHLH
Prupe.1G341300.1.p	Prupe_1G341300	bHLH
Prupe.1G341300.2.p	Prupe_1G341300	bHLH
Prupe.1G341300.3.p	Prupe_1G341300	bHLH
Prupe.1G375000.1.p	Prupe_1G375000	bHLH
Prupe.1G375000.2.p	Prupe_1G375000	bHLH
Prupe.1G418500.1.p	Prupe_1G418500	bHLH
Prupe.1G418500.2.p	Prupe_1G418500	bHLH
Prupe.1G418500.3.p	Prupe_1G418500	bHLH
Prupe.1G418500.4.p	Prupe_1G418500	bHLH
Prupe.1G424000.1.p	Prupe_1G424000	bHLH
Prupe.1G424100.1.p	Prupe_1G424100	bHLH
Prupe.1G432800.1.p	Prupe_1G432800	bHLH
Prupe.1G432900.1.p	Prupe_1G432900	bHLH
Prupe.1G434000.1.p	Prupe_1G434000	bHLH
Prupe.1G524500.1.p	Prupe_1G524500	bHLH
Prupe.1G524500.2.p	Prupe_1G524500	bHLH
Prupe.1G530800.1.p	Prupe_1G530800	bHLH
Prupe.1G540400.1.p	Prupe_1G540400	bHLH
Prupe.1G554600.10.p	Prupe_1G554600	bHLH
Prupe.1G554600.1.p	Prupe_1G554600	bHLH
Prupe.1G554600.2.p	Prupe_1G554600	bHLH
Prupe.1G554600.3.p	Prupe_1G554600	bHLH
Prupe.1G554600.4.p	Prupe_1G554600	bHLH
Prupe.1G554600.5.p	Prupe_1G554600	bHLH
Prupe.1G554600.6.p	Prupe_1G554600	bHLH
Prupe.1G554600.7.p	Prupe_1G554600	bHLH
Prupe.1G554600.8.p	Prupe_1G554600	bHLH
Prupe.1G554600.9.p	Prupe_1G554600	bHLH
Prupe.2G009100.1.p	Prupe_2G009100	bHLH
Prupe.2G009100.2.p	Prupe_2G009100	bHLH
Prupe.2G009100.3.p	Prupe_2G009100	bHLH
Prupe.2G097200.1.p	Prupe_2G097200	bHLH
Prupe.2G097200.2.p	Prupe_2G097200	bHLH
Prupe.2G097400.1.p	Prupe_2G097400	bHLH
Prupe.2G136300.1.p	Prupe_2G136300	bHLH
Prupe.2G136300.2.p	Prupe_2G136300	bHLH
Prupe.2G136300.3.p	Prupe_2G136300	bHLH
Prupe.2G170100.1.p	Prupe_2G170100	bHLH
Prupe.2G170100.2.p	Prupe_2G170100	bHLH
Prupe.2G190100.1.p	Prupe_2G190100	bHLH
Prupe.2G190100.2.p	Prupe_2G190100	bHLH
Prupe.2G195300.1.p	Prupe_2G195300	bHLH
Prupe.2G195300.2.p	Prupe_2G195300	bHLH
Prupe.2G198800.1.p	Prupe_2G198800	bHLH
Prupe.2G198800.2.p	Prupe_2G198800	bHLH
Prupe.2G230000.10.p	Prupe_2G230000	bHLH
Prupe.2G230000.11.p	Prupe_2G230000	bHLH
Prupe.2G230000.12.p	Prupe_2G230000	bHLH
Prupe.2G230000.19.p	Prupe_2G230000	bHLH
Prupe.2G230000.1.p	Prupe_2G230000	bHLH
Prupe.2G230000.20.p	Prupe_2G230000	bHLH
Prupe.2G230000.21.p	Prupe_2G230000	bHLH
Prupe.2G230000.22.p	Prupe_2G230000	bHLH
Prupe.2G230000.2.p	Prupe_2G230000	bHLH
Prupe.2G230000.3.p	Prupe_2G230000	bHLH
Prupe.2G230000.4.p	Prupe_2G230000	bHLH
Prupe.2G230000.5.p	Prupe_2G230000	bHLH
Prupe.2G230000.6.p	Prupe_2G230000	bHLH
Prupe.2G230000.7.p	Prupe_2G230000	bHLH
Prupe.2G230000.8.p	Prupe_2G230000	bHLH
Prupe.2G230000.9.p	Prupe_2G230000	bHLH
Prupe.2G252600.1.p	Prupe_2G252600	bHLH
Prupe.2G285900.1.p	Prupe_2G285900	bHLH
Prupe.2G285900.2.p	Prupe_2G285900	bHLH
Prupe.2G285900.3.p	Prupe_2G285900	bHLH
Prupe.2G285900.4.p	Prupe_2G285900	bHLH
Prupe.2G286000.1.p	Prupe_2G286000	bHLH
Prupe.2G286000.2.p	Prupe_2G286000	bHLH
Prupe.2G286100.1.p	Prupe_2G286100	bHLH
Prupe.2G307300.1.p	Prupe_2G307300	bHLH
Prupe.3G054400.1.p	Prupe_3G054400	bHLH
Prupe.3G064500.1.p	Prupe_3G064500	bHLH
Prupe.3G064500.2.p	Prupe_3G064500	bHLH
Prupe.3G064500.3.p	Prupe_3G064500	bHLH
Prupe.3G131500.1.p	Prupe_3G131500	bHLH
Prupe.3G159800.1.p	Prupe_3G159800	bHLH
Prupe.3G179800.1.p	Prupe_3G179800	bHLH
Prupe.3G179800.2.p	Prupe_3G179800	bHLH
Prupe.3G179800.3.p	Prupe_3G179800	bHLH
Prupe.3G179800.4.p	Prupe_3G179800	bHLH
Prupe.3G179800.5.p	Prupe_3G179800	bHLH
Prupe.3G179800.6.p	Prupe_3G179800	bHLH
Prupe.3G179800.7.p	Prupe_3G179800	bHLH
Prupe.3G222500.1.p	Prupe_3G222500	bHLH
Prupe.3G248100.1.p	Prupe_3G248100	bHLH
Prupe.3G248100.2.p	Prupe_3G248100	bHLH
Prupe.3G248100.3.p	Prupe_3G248100	bHLH
Prupe.3G269500.1.p	Prupe_3G269500	bHLH
Prupe.3G269500.2.p	Prupe_3G269500	bHLH
Prupe.3G269500.3.p	Prupe_3G269500	bHLH
Prupe.3G312800.1.p	Prupe_3G312800	bHLH
Prupe.3G312800.2.p	Prupe_3G312800	bHLH
Prupe.4G029000.1.p	Prupe_4G029000	bHLH
Prupe.4G030600.1.p	Prupe_4G030600	bHLH
Prupe.4G030900.1.p	Prupe_4G030900	bHLH
Prupe.4G030900.2.p	Prupe_4G030900	bHLH
Prupe.4G048500.1.p	Prupe_4G048500	bHLH
Prupe.4G048500.2.p	Prupe_4G048500	bHLH
Prupe.4G060000.1.p	Prupe_4G060000	bHLH
Prupe.4G077100.1.p	Prupe_4G077100	bHLH
Prupe.4G100400.1.p	Prupe_4G100400	bHLH
Prupe.4G134200.1.p	Prupe_4G134200	bHLH
Prupe.4G196600.1.p	Prupe_4G196600	bHLH
Prupe.4G196600.2.p	Prupe_4G196600	bHLH
Prupe.4G201500.1.p	Prupe_4G201500	bHLH
Prupe.5G033300.1.p	Prupe_5G033300	bHLH
Prupe.5G035400.1.p	Prupe_5G035400	bHLH
Prupe.5G043700.1.p	Prupe_5G043700	bHLH
Prupe.5G086600.1.p	Prupe_5G086600	bHLH
Prupe.5G087600.1.p	Prupe_5G087600	bHLH
Prupe.5G087600.2.p	Prupe_5G087600	bHLH
Prupe.5G087600.3.p	Prupe_5G087600	bHLH
Prupe.5G087600.4.p	Prupe_5G087600	bHLH
Prupe.5G087600.5.p	Prupe_5G087600	bHLH
Prupe.5G087600.6.p	Prupe_5G087600	bHLH
Prupe.5G087600.7.p	Prupe_5G087600	bHLH
Prupe.5G087600.8.p	Prupe_5G087600	bHLH
Prupe.5G087900.1.p	Prupe_5G087900	bHLH
Prupe.5G100700.1.p	Prupe_5G100700	bHLH
Prupe.5G100700.2.p	Prupe_5G100700	bHLH
Prupe.5G100700.3.p	Prupe_5G100700	bHLH
Prupe.5G130300.1.p	Prupe_5G130300	bHLH
Prupe.5G130400.1.p	Prupe_5G130400	bHLH
Prupe.5G130500.1.p	Prupe_5G130500	bHLH
Prupe.5G130500.2.p	Prupe_5G130500	bHLH
Prupe.5G130600.1.p	Prupe_5G130600	bHLH
Prupe.5G130700.1.p	Prupe_5G130700	bHLH
Prupe.5G143200.1.p	Prupe_5G143200	bHLH
Prupe.5G144400.1.p	Prupe_5G144400	bHLH
Prupe.5G175200.1.p	Prupe_5G175200	bHLH
Prupe.5G175300.1.p	Prupe_5G175300	bHLH
Prupe.5G183200.1.p	Prupe_5G183200	bHLH
Prupe.5G183200.2.p	Prupe_5G183200	bHLH
Prupe.5G183200.3.p	Prupe_5G183200	bHLH
Prupe.5G183200.4.p	Prupe_5G183200	bHLH
Prupe.5G183200.5.p	Prupe_5G183200	bHLH
Prupe.5G189300.1.p	Prupe_5G189300	bHLH
Prupe.5G189600.1.p	Prupe_5G189600	bHLH
Prupe.5G190100.1.p	Prupe_5G190100	bHLH
Prupe.5G200100.1.p	Prupe_5G200100	bHLH
Prupe.5G210500.1.p	Prupe_5G210500	bHLH
Prupe.5G210500.2.p	Prupe_5G210500	bHLH
Prupe.5G210500.3.p	Prupe_5G210500	bHLH
Prupe.5G210500.4.p	Prupe_5G210500	bHLH
Prupe.5G210500.5.p	Prupe_5G210500	bHLH
Prupe.5G210500.6.p	Prupe_5G210500	bHLH
Prupe.5G222200.1.p	Prupe_5G222200	bHLH
Prupe.6G022200.1.p	Prupe_6G022200	bHLH
Prupe.6G022200.2.p	Prupe_6G022200	bHLH
Prupe.6G022200.3.p	Prupe_6G022200	bHLH
Prupe.6G022200.4.p	Prupe_6G022200	bHLH
Prupe.6G112600.1.p	Prupe_6G112600	bHLH
Prupe.6G159200.1.p	Prupe_6G159200	bHLH
Prupe.6G194400.1.p	Prupe_6G194400	bHLH
Prupe.6G198500.1.p	Prupe_6G198500	bHLH
Prupe.6G210200.1.p	Prupe_6G210200	bHLH
Prupe.6G211900.1.p	Prupe_6G211900	bHLH
Prupe.6G212000.1.p	Prupe_6G212000	bHLH
Prupe.6G281600.1.p	Prupe_6G281600	bHLH
Prupe.6G289300.1.p	Prupe_6G289300	bHLH
Prupe.6G289300.2.p	Prupe_6G289300	bHLH
Prupe.6G303500.1.p	Prupe_6G303500	bHLH
Prupe.6G329600.1.p	Prupe_6G329600	bHLH
Prupe.6G329600.2.p	Prupe_6G329600	bHLH
Prupe.6G343400.1.p	Prupe_6G343400	bHLH
Prupe.6G343400.2.p	Prupe_6G343400	bHLH
Prupe.7G031500.1.p	Prupe_7G031500	bHLH
Prupe.7G039800.1.p	Prupe_7G039800	bHLH
Prupe.7G039900.1.p	Prupe_7G039900	bHLH
Prupe.7G040100.1.p	Prupe_7G040100	bHLH
Prupe.7G040100.2.p	Prupe_7G040100	bHLH
Prupe.7G040300.1.p	Prupe_7G040300	bHLH
Prupe.7G040500.1.p	Prupe_7G040500	bHLH
Prupe.7G070200.1.p	Prupe_7G070200	bHLH
Prupe.7G071500.1.p	Prupe_7G071500	bHLH
Prupe.7G131400.1.p	Prupe_7G131400	bHLH
Prupe.7G131400.2.p	Prupe_7G131400	bHLH
Prupe.7G131400.3.p	Prupe_7G131400	bHLH
Prupe.7G131400.4.p	Prupe_7G131400	bHLH
Prupe.7G131400.5.p	Prupe_7G131400	bHLH
Prupe.7G131400.6.p	Prupe_7G131400	bHLH
Prupe.7G131400.7.p	Prupe_7G131400	bHLH
Prupe.7G131400.8.p	Prupe_7G131400	bHLH
Prupe.7G132300.1.p	Prupe_7G132300	bHLH
Prupe.7G168500.1.p	Prupe_7G168500	bHLH
Prupe.7G168500.3.p	Prupe_7G168500	bHLH
Prupe.7G168500.4.p	Prupe_7G168500	bHLH
Prupe.7G191100.1.p	Prupe_7G191100	bHLH
Prupe.7G191100.2.p	Prupe_7G191100	bHLH
Prupe.7G191100.3.p	Prupe_7G191100	bHLH
Prupe.7G191100.4.p	Prupe_7G191100	bHLH
Prupe.7G207500.1.p	Prupe_7G207500	bHLH
Prupe.7G225800.1.p	Prupe_7G225800	bHLH
Prupe.7G260800.1.p	Prupe_7G260800	bHLH
Prupe.7G260800.2.p	Prupe_7G260800	bHLH
Prupe.8G095700.1.p	Prupe_8G095700	bHLH
Prupe.8G095700.2.p	Prupe_8G095700	bHLH
Prupe.8G095700.3.p	Prupe_8G095700	bHLH
Prupe.8G095700.4.p	Prupe_8G095700	bHLH
Prupe.8G095700.5.p	Prupe_8G095700	bHLH
Prupe.8G095700.6.p	Prupe_8G095700	bHLH
Prupe.8G127700.1.p	Prupe_8G127700	bHLH
Prupe.8G136800.1.p	Prupe_8G136800	bHLH
Prupe.8G143500.1.p	Prupe_8G143500	bHLH
Prupe.8G143600.1.p	Prupe_8G143600	bHLH
Prupe.8G157500.1.p	Prupe_8G157500	bHLH
Prupe.8G157500.2.p	Prupe_8G157500	bHLH
Prupe.8G160700.1.p	Prupe_8G160700	bHLH
Prupe.8G166800.1.p	Prupe_8G166800	bHLH
Prupe.8G166800.2.p	Prupe_8G166800	bHLH
Prupe.8G166800.3.p	Prupe_8G166800	bHLH
Prupe.8G166800.4.p	Prupe_8G166800	bHLH
Prupe.8G166800.5.p	Prupe_8G166800	bHLH
Prupe.8G166900.1.p	Prupe_8G166900	bHLH
Prupe.8G193900.1.p	Prupe_8G193900	bHLH
Prupe.8G193900.2.p	Prupe_8G193900	bHLH
Prupe.8G209100.1.p	Prupe_8G209100	bHLH
Prupe.8G209100.2.p	Prupe_8G209100	bHLH
Prupe.8G209100.3.p	Prupe_8G209100	bHLH
Prupe.8G209100.4.p	Prupe_8G209100	bHLH
Prupe.8G209100.5.p	Prupe_8G209100	bHLH
Prupe.8G209100.6.p	Prupe_8G209100	bHLH
Prupe.8G225900.1.p	Prupe_8G225900	bHLH
Prupe.8G225900.2.p	Prupe_8G225900	bHLH
Prupe.8G225900.3.p	Prupe_8G225900	bHLH
Prupe.8G225900.4.p	Prupe_8G225900	bHLH
Prupe.8G228700.1.p	Prupe_8G228700	bHLH
Prupe.8G228700.2.p	Prupe_8G228700	bHLH
Prupe.8G228700.3.p	Prupe_8G228700	bHLH
Prupe.8G228700.4.p	Prupe_8G228700	bHLH
Prupe.8G232600.1.p	Prupe_8G232600	bHLH
Prupe.8G242100.1.p	Prupe_8G242100	bHLH
Prupe.8G242100.2.p	Prupe_8G242100	bHLH
Prupe.8G243500.1.p	Prupe_8G243500	bHLH
Prupe.8G243500.2.p	Prupe_8G243500	bHLH
Prupe.8G243500.3.p	Prupe_8G243500	bHLH
Prupe.8G243500.4.p	Prupe_8G243500	bHLH
Prupe.8G243500.5.p	Prupe_8G243500	bHLH
Prupe.8G243500.6.p	Prupe_8G243500	bHLH
Prupe.8G243500.7.p	Prupe_8G243500	bHLH
Prupe.8G243500.8.p	Prupe_8G243500	bHLH
Prupe.1G197700.1.p	Prupe_1G197700	bZIP
Prupe.1G197700.2.p	Prupe_1G197700	bZIP
Prupe.1G208500.1.p	Prupe_1G208500	bZIP
Prupe.1G208500.2.p	Prupe_1G208500	bZIP
Prupe.1G298200.1.p	Prupe_1G298200	bZIP
Prupe.1G307300.1.p	Prupe_1G307300	bZIP
Prupe.1G307300.2.p	Prupe_1G307300	bZIP
Prupe.1G307300.3.p	Prupe_1G307300	bZIP
Prupe.1G307300.4.p	Prupe_1G307300	bZIP
Prupe.1G307300.5.p	Prupe_1G307300	bZIP
Prupe.1G361100.1.p	Prupe_1G361100	bZIP
Prupe.1G369300.1.p	Prupe_1G369300	bZIP
Prupe.1G369300.2.p	Prupe_1G369300	bZIP
Prupe.1G374400.1.p	Prupe_1G374400	bZIP
Prupe.1G419700.1.p	Prupe_1G419700	bZIP
Prupe.1G434500.1.p	Prupe_1G434500	bZIP
Prupe.1G455300.1.p	Prupe_1G455300	bZIP
Prupe.1G478400.1.p	Prupe_1G478400	bZIP
Prupe.1G508100.10.p	Prupe_1G508100	bZIP
Prupe.1G508100.11.p	Prupe_1G508100	bZIP
Prupe.1G508100.12.p	Prupe_1G508100	bZIP
Prupe.1G508100.13.p	Prupe_1G508100	bZIP
Prupe.1G508100.14.p	Prupe_1G508100	bZIP
Prupe.1G508100.15.p	Prupe_1G508100	bZIP
Prupe.1G508100.16.p	Prupe_1G508100	bZIP
Prupe.1G508100.17.p	Prupe_1G508100	bZIP
Prupe.1G508100.1.p	Prupe_1G508100	bZIP
Prupe.1G508100.2.p	Prupe_1G508100	bZIP
Prupe.1G508100.3.p	Prupe_1G508100	bZIP
Prupe.1G508100.4.p	Prupe_1G508100	bZIP
Prupe.1G508100.5.p	Prupe_1G508100	bZIP
Prupe.1G508100.6.p	Prupe_1G508100	bZIP
Prupe.1G508100.7.p	Prupe_1G508100	bZIP
Prupe.1G508100.8.p	Prupe_1G508100	bZIP
Prupe.1G508100.9.p	Prupe_1G508100	bZIP
Prupe.1G508200.1.p	Prupe_1G508200	bZIP
Prupe.1G562000.1.p	Prupe_1G562000	bZIP
Prupe.1G575800.1.p	Prupe_1G575800	bZIP
Prupe.1G575800.2.p	Prupe_1G575800	bZIP
Prupe.2G020400.1.p	Prupe_2G020400	bZIP
Prupe.2G025800.1.p	Prupe_2G025800	bZIP
Prupe.2G025800.2.p	Prupe_2G025800	bZIP
Prupe.2G025800.3.p	Prupe_2G025800	bZIP
Prupe.2G041300.1.p	Prupe_2G041300	bZIP
Prupe.2G056800.1.p	Prupe_2G056800	bZIP
Prupe.2G056800.2.p	Prupe_2G056800	bZIP
Prupe.2G056800.3.p	Prupe_2G056800	bZIP
Prupe.2G182800.1.p	Prupe_2G182800	bZIP
Prupe.2G182800.2.p	Prupe_2G182800	bZIP
Prupe.2G182800.3.p	Prupe_2G182800	bZIP
Prupe.2G182800.4.p	Prupe_2G182800	bZIP
Prupe.2G182800.5.p	Prupe_2G182800	bZIP
Prupe.2G182800.6.p	Prupe_2G182800	bZIP
Prupe.2G182800.7.p	Prupe_2G182800	bZIP
Prupe.2G182800.8.p	Prupe_2G182800	bZIP
Prupe.2G263700.1.p	Prupe_2G263700	bZIP
Prupe.3G125500.1.p	Prupe_3G125500	bZIP
Prupe.3G246000.1.p	Prupe_3G246000	bZIP
Prupe.4G172000.1.p	Prupe_4G172000	bZIP
Prupe.4G172000.2.p	Prupe_4G172000	bZIP
Prupe.5G003000.1.p	Prupe_5G003000	bZIP
Prupe.5G027000.1.p	Prupe_5G027000	bZIP
Prupe.5G113500.1.p	Prupe_5G113500	bZIP
Prupe.5G211200.1.p	Prupe_5G211200	bZIP
Prupe.6G041400.1.p	Prupe_6G041400	bZIP
Prupe.6G128900.1.p	Prupe_6G128900	bZIP
Prupe.6G128900.2.p	Prupe_6G128900	bZIP
Prupe.6G128900.3.p	Prupe_6G128900	bZIP
Prupe.6G128900.4.p	Prupe_6G128900	bZIP
Prupe.6G129100.1.p	Prupe_6G129100	bZIP
Prupe.6G129100.2.p	Prupe_6G129100	bZIP
Prupe.6G129100.3.p	Prupe_6G129100	bZIP
Prupe.6G129100.4.p	Prupe_6G129100	bZIP
Prupe.6G129100.5.p	Prupe_6G129100	bZIP
Prupe.6G129100.6.p	Prupe_6G129100	bZIP
Prupe.6G129100.7.p	Prupe_6G129100	bZIP
Prupe.6G129100.8.p	Prupe_6G129100	bZIP
Prupe.6G156000.10.p	Prupe_6G156000	bZIP
Prupe.6G156000.11.p	Prupe_6G156000	bZIP
Prupe.6G156000.12.p	Prupe_6G156000	bZIP
Prupe.6G156000.13.p	Prupe_6G156000	bZIP
Prupe.6G156000.14.p	Prupe_6G156000	bZIP
Prupe.6G156000.1.p	Prupe_6G156000	bZIP
Prupe.6G156000.2.p	Prupe_6G156000	bZIP
Prupe.6G156000.3.p	Prupe_6G156000	bZIP
Prupe.6G156000.4.p	Prupe_6G156000	bZIP
Prupe.6G156000.5.p	Prupe_6G156000	bZIP
Prupe.6G156000.6.p	Prupe_6G156000	bZIP
Prupe.6G156000.7.p	Prupe_6G156000	bZIP
Prupe.6G156000.8.p	Prupe_6G156000	bZIP
Prupe.6G156000.9.p	Prupe_6G156000	bZIP
Prupe.6G177200.1.p	Prupe_6G177200	bZIP
Prupe.6G177200.2.p	Prupe_6G177200	bZIP
Prupe.6G177200.3.p	Prupe_6G177200	bZIP
Prupe.6G177200.4.p	Prupe_6G177200	bZIP
Prupe.6G177200.5.p	Prupe_6G177200	bZIP
Prupe.6G177200.6.p	Prupe_6G177200	bZIP
Prupe.6G217300.1.p	Prupe_6G217300	bZIP
Prupe.6G282200.1.p	Prupe_6G282200	bZIP
Prupe.6G343100.1.p	Prupe_6G343100	bZIP
Prupe.7G037900.1.p	Prupe_7G037900	bZIP
Prupe.7G037900.2.p	Prupe_7G037900	bZIP
Prupe.7G037900.3.p	Prupe_7G037900	bZIP
Prupe.7G037900.4.p	Prupe_7G037900	bZIP
Prupe.7G073000.1.p	Prupe_7G073000	bZIP
Prupe.7G073000.2.p	Prupe_7G073000	bZIP
Prupe.7G112200.1.p	Prupe_7G112200	bZIP
Prupe.7G112200.2.p	Prupe_7G112200	bZIP
Prupe.7G112200.3.p	Prupe_7G112200	bZIP
Prupe.7G114400.1.p	Prupe_7G114400	bZIP
Prupe.7G114400.2.p	Prupe_7G114400	bZIP
Prupe.7G150700.1.p	Prupe_7G150700	bZIP
Prupe.7G150700.2.p	Prupe_7G150700	bZIP
Prupe.7G150700.3.p	Prupe_7G150700	bZIP
Prupe.7G150700.4.p	Prupe_7G150700	bZIP
Prupe.7G150700.5.p	Prupe_7G150700	bZIP
Prupe.7G150700.6.p	Prupe_7G150700	bZIP
Prupe.7G160600.1.p	Prupe_7G160600	bZIP
Prupe.7G173300.1.p	Prupe_7G173300	bZIP
Prupe.8G026300.1.p	Prupe_8G026300	bZIP
Prupe.8G031500.1.p	Prupe_8G031500	bZIP
Prupe.8G031500.2.p	Prupe_8G031500	bZIP
Prupe.8G031500.3.p	Prupe_8G031500	bZIP
Prupe.8G031500.4.p	Prupe_8G031500	bZIP
Prupe.8G031500.5.p	Prupe_8G031500	bZIP
Prupe.8G091600.1.p	Prupe_8G091600	bZIP
Prupe.8G102100.10.p	Prupe_8G102100	bZIP
Prupe.8G102100.11.p	Prupe_8G102100	bZIP
Prupe.8G102100.12.p	Prupe_8G102100	bZIP
Prupe.8G102100.13.p	Prupe_8G102100	bZIP
Prupe.8G102100.14.p	Prupe_8G102100	bZIP
Prupe.8G102100.15.p	Prupe_8G102100	bZIP
Prupe.8G102100.16.p	Prupe_8G102100	bZIP
Prupe.8G102100.1.p	Prupe_8G102100	bZIP
Prupe.8G102100.2.p	Prupe_8G102100	bZIP
Prupe.8G102100.3.p	Prupe_8G102100	bZIP
Prupe.8G102100.4.p	Prupe_8G102100	bZIP
Prupe.8G102100.5.p	Prupe_8G102100	bZIP
Prupe.8G102100.6.p	Prupe_8G102100	bZIP
Prupe.8G102100.7.p	Prupe_8G102100	bZIP
Prupe.8G102100.8.p	Prupe_8G102100	bZIP
Prupe.8G102100.9.p	Prupe_8G102100	bZIP
Prupe.8G126600.1.p	Prupe_8G126600	bZIP
Prupe.8G126600.2.p	Prupe_8G126600	bZIP
Prupe.8G126600.3.p	Prupe_8G126600	bZIP
Prupe.8G126600.4.p	Prupe_8G126600	bZIP
Prupe.8G165400.1.p	Prupe_8G165400	bZIP
Prupe.8G165400.2.p	Prupe_8G165400	bZIP
Prupe.8G165400.3.p	Prupe_8G165400	bZIP
Prupe.8G165400.4.p	Prupe_8G165400	bZIP
Prupe.8G165400.5.p	Prupe_8G165400	bZIP
Prupe.8G165400.6.p	Prupe_8G165400	bZIP
Prupe.8G165400.7.p	Prupe_8G165400	bZIP
Prupe.8G165400.8.p	Prupe_8G165400	bZIP
Prupe.8G184500.1.p	Prupe_8G184500	bZIP
Prupe.8G232800.1.p	Prupe_8G232800	bZIP
Prupe.8G267100.1.p	Prupe_8G267100	bZIP
Prupe.1G034100.1.p	Prupe_1G034100	C2H2
Prupe.1G034100.2.p	Prupe_1G034100	C2H2
Prupe.1G034200.1.p	Prupe_1G034200	C2H2
Prupe.1G040800.1.p	Prupe_1G040800	C2H2
Prupe.1G088000.1.p	Prupe_1G088000	C2H2
Prupe.1G170500.1.p	Prupe_1G170500	C2H2
Prupe.1G170500.2.p	Prupe_1G170500	C2H2
Prupe.1G260700.1.p	Prupe_1G260700	C2H2
Prupe.1G306200.1.p	Prupe_1G306200	C2H2
Prupe.1G331600.1.p	Prupe_1G331600	C2H2
Prupe.1G331600.2.p	Prupe_1G331600	C2H2
Prupe.1G336500.1.p	Prupe_1G336500	C2H2
Prupe.1G336500.2.p	Prupe_1G336500	C2H2
Prupe.1G336500.3.p	Prupe_1G336500	C2H2
Prupe.1G336500.4.p	Prupe_1G336500	C2H2
Prupe.1G336500.5.p	Prupe_1G336500	C2H2
Prupe.1G336500.6.p	Prupe_1G336500	C2H2
Prupe.1G338700.1.p	Prupe_1G338700	C2H2
Prupe.1G341000.1.p	Prupe_1G341000	C2H2
Prupe.1G341000.2.p	Prupe_1G341000	C2H2
Prupe.1G341100.1.p	Prupe_1G341100	C2H2
Prupe.1G366300.1.p	Prupe_1G366300	C2H2
Prupe.1G381800.1.p	Prupe_1G381800	C2H2
Prupe.1G410700.1.p	Prupe_1G410700	C2H2
Prupe.1G410700.2.p	Prupe_1G410700	C2H2
Prupe.1G424300.1.p	Prupe_1G424300	C2H2
Prupe.1G431900.1.p	Prupe_1G431900	C2H2
Prupe.1G503600.1.p	Prupe_1G503600	C2H2
Prupe.1G519400.1.p	Prupe_1G519400	C2H2
Prupe.1G551600.1.p	Prupe_1G551600	C2H2
Prupe.1G551600.2.p	Prupe_1G551600	C2H2
Prupe.1G551600.3.p	Prupe_1G551600	C2H2
Prupe.1G551600.4.p	Prupe_1G551600	C2H2
Prupe.1G576100.1.p	Prupe_1G576100	C2H2
Prupe.1G576100.2.p	Prupe_1G576100	C2H2
Prupe.2G042200.1.p	Prupe_2G042200	C2H2
Prupe.2G048100.1.p	Prupe_2G048100	C2H2
Prupe.2G048400.1.p	Prupe_2G048400	C2H2
Prupe.2G054400.1.p	Prupe_2G054400	C2H2
Prupe.2G054600.1.p	Prupe_2G054600	C2H2
Prupe.2G136700.1.p	Prupe_2G136700	C2H2
Prupe.2G205700.1.p	Prupe_2G205700	C2H2
Prupe.2G211400.1.p	Prupe_2G211400	C2H2
Prupe.2G211400.2.p	Prupe_2G211400	C2H2
Prupe.2G230800.1.p	Prupe_2G230800	C2H2
Prupe.2G275700.1.p	Prupe_2G275700	C2H2
Prupe.2G297500.1.p	Prupe_2G297500	C2H2
Prupe.3G048600.1.p	Prupe_3G048600	C2H2
Prupe.3G048600.2.p	Prupe_3G048600	C2H2
Prupe.3G048600.3.p	Prupe_3G048600	C2H2
Prupe.3G048600.4.p	Prupe_3G048600	C2H2
Prupe.3G048600.5.p	Prupe_3G048600	C2H2
Prupe.3G096400.1.p	Prupe_3G096400	C2H2
Prupe.3G128100.1.p	Prupe_3G128100	C2H2
Prupe.3G128100.2.p	Prupe_3G128100	C2H2
Prupe.3G257500.1.p	Prupe_3G257500	C2H2
Prupe.3G307100.1.p	Prupe_3G307100	C2H2
Prupe.4G066100.1.p	Prupe_4G066100	C2H2
Prupe.4G081800.1.p	Prupe_4G081800	C2H2
Prupe.4G250800.1.p	Prupe_4G250800	C2H2
Prupe.5G038200.1.p	Prupe_5G038200	C2H2
Prupe.5G079100.1.p	Prupe_5G079100	C2H2
Prupe.5G079100.3.p	Prupe_5G079100	C2H2
Prupe.5G157300.3.p	Prupe_5G157300	C2H2
Prupe.5G159200.1.p	Prupe_5G159200	C2H2
Prupe.5G201200.1.p	Prupe_5G201200	C2H2
Prupe.5G201200.2.p	Prupe_5G201200	C2H2
Prupe.5G201200.3.p	Prupe_5G201200	C2H2
Prupe.5G201200.4.p	Prupe_5G201200	C2H2
Prupe.5G201400.1.p	Prupe_5G201400	C2H2
Prupe.5G204600.1.p	Prupe_5G204600	C2H2
Prupe.5G204600.2.p	Prupe_5G204600	C2H2
Prupe.5G204600.3.p	Prupe_5G204600	C2H2
Prupe.5G216800.1.p	Prupe_5G216800	C2H2
Prupe.5G216800.2.p	Prupe_5G216800	C2H2
Prupe.5G239100.1.p	Prupe_5G239100	C2H2
Prupe.6G023800.1.p	Prupe_6G023800	C2H2
Prupe.6G035400.1.p	Prupe_6G035400	C2H2
Prupe.6G060000.1.p	Prupe_6G060000	C2H2
Prupe.6G070100.1.p	Prupe_6G070100	C2H2
Prupe.6G084100.1.p	Prupe_6G084100	C2H2
Prupe.6G093400.1.p	Prupe_6G093400	C2H2
Prupe.6G093500.1.p	Prupe_6G093500	C2H2
Prupe.6G098800.1.p	Prupe_6G098800	C2H2
Prupe.6G113100.1.p	Prupe_6G113100	C2H2
Prupe.6G113300.1.p	Prupe_6G113300	C2H2
Prupe.6G127700.1.p	Prupe_6G127700	C2H2
Prupe.6G188400.1.p	Prupe_6G188400	C2H2
Prupe.6G238500.1.p	Prupe_6G238500	C2H2
Prupe.6G240900.1.p	Prupe_6G240900	C2H2
Prupe.6G249300.1.p	Prupe_6G249300	C2H2
Prupe.6G260600.1.p	Prupe_6G260600	C2H2
Prupe.6G260700.1.p	Prupe_6G260700	C2H2
Prupe.6G323100.1.p	Prupe_6G323100	C2H2
Prupe.7G063400.1.p	Prupe_7G063400	C2H2
Prupe.7G063600.1.p	Prupe_7G063600	C2H2
Prupe.7G067900.1.p	Prupe_7G067900	C2H2
Prupe.7G082300.1.p	Prupe_7G082300	C2H2
Prupe.7G118500.1.p	Prupe_7G118500	C2H2
Prupe.7G118500.2.p	Prupe_7G118500	C2H2
Prupe.7G125800.1.p	Prupe_7G125800	C2H2
Prupe.7G151500.1.p	Prupe_7G151500	C2H2
Prupe.7G229900.1.p	Prupe_7G229900	C2H2
Prupe.7G229900.2.p	Prupe_7G229900	C2H2
Prupe.8G055100.1.p	Prupe_8G055100	C2H2
Prupe.8G055100.2.p	Prupe_8G055100	C2H2
Prupe.8G062800.1.p	Prupe_8G062800	C2H2
Prupe.8G062800.2.p	Prupe_8G062800	C2H2
Prupe.8G142400.1.p	Prupe_8G142400	C2H2
Prupe.8G227900.1.p	Prupe_8G227900	C2H2
Prupe.8G228000.1.p	Prupe_8G228000	C2H2
Prupe.8G228000.2.p	Prupe_8G228000	C2H2
Prupe.8G234800.1.p	Prupe_8G234800	C2H2
Prupe.8G255800.1.p	Prupe_8G255800	C2H2
Prupe.1G000600.1.p	Prupe_1G000600	C3H
Prupe.1G000600.2.p	Prupe_1G000600	C3H
Prupe.1G000600.3.p	Prupe_1G000600	C3H
Prupe.1G000600.4.p	Prupe_1G000600	C3H
Prupe.1G000600.5.p	Prupe_1G000600	C3H
Prupe.1G139500.1.p	Prupe_1G139500	C3H
Prupe.1G318500.1.p	Prupe_1G318500	C3H
Prupe.1G342700.1.p	Prupe_1G342700	C3H
Prupe.1G416500.1.p	Prupe_1G416500	C3H
Prupe.1G585000.1.p	Prupe_1G585000	C3H
Prupe.2G011700.1.p	Prupe_2G011700	C3H
Prupe.2G011700.2.p	Prupe_2G011700	C3H
Prupe.2G251000.1.p	Prupe_2G251000	C3H
Prupe.2G251000.2.p	Prupe_2G251000	C3H
Prupe.2G288900.1.p	Prupe_2G288900	C3H
Prupe.3G080200.1.p	Prupe_3G080200	C3H
Prupe.3G080200.2.p	Prupe_3G080200	C3H
Prupe.3G080200.3.p	Prupe_3G080200	C3H
Prupe.3G080700.1.p	Prupe_3G080700	C3H
Prupe.3G080700.2.p	Prupe_3G080700	C3H
Prupe.3G083300.1.p	Prupe_3G083300	C3H
Prupe.3G133500.1.p	Prupe_3G133500	C3H
Prupe.3G149200.1.p	Prupe_3G149200	C3H
Prupe.3G149200.2.p	Prupe_3G149200	C3H
Prupe.3G209200.1.p	Prupe_3G209200	C3H
Prupe.3G209200.2.p	Prupe_3G209200	C3H
Prupe.3G220100.1.p	Prupe_3G220100	C3H
Prupe.3G220100.2.p	Prupe_3G220100	C3H
Prupe.4G051000.10.p	Prupe_4G051000	C3H
Prupe.4G051000.11.p	Prupe_4G051000	C3H
Prupe.4G051000.12.p	Prupe_4G051000	C3H
Prupe.4G051000.1.p	Prupe_4G051000	C3H
Prupe.4G051000.2.p	Prupe_4G051000	C3H
Prupe.4G051000.3.p	Prupe_4G051000	C3H
Prupe.4G051000.4.p	Prupe_4G051000	C3H
Prupe.4G051000.5.p	Prupe_4G051000	C3H
Prupe.4G051000.6.p	Prupe_4G051000	C3H
Prupe.4G051000.7.p	Prupe_4G051000	C3H
Prupe.4G051000.8.p	Prupe_4G051000	C3H
Prupe.4G051000.9.p	Prupe_4G051000	C3H
Prupe.4G124000.1.p	Prupe_4G124000	C3H
Prupe.4G124000.2.p	Prupe_4G124000	C3H
Prupe.4G124000.3.p	Prupe_4G124000	C3H
Prupe.4G124000.4.p	Prupe_4G124000	C3H
Prupe.4G124000.5.p	Prupe_4G124000	C3H
Prupe.4G124000.6.p	Prupe_4G124000	C3H
Prupe.4G248900.1.p	Prupe_4G248900	C3H
Prupe.4G263300.1.p	Prupe_4G263300	C3H
Prupe.5G033000.1.p	Prupe_5G033000	C3H
Prupe.5G033000.2.p	Prupe_5G033000	C3H
Prupe.5G158300.1.p	Prupe_5G158300	C3H
Prupe.5G158300.2.p	Prupe_5G158300	C3H
Prupe.5G158400.1.p	Prupe_5G158400	C3H
Prupe.5G158400.2.p	Prupe_5G158400	C3H
Prupe.5G158500.13.p	Prupe_5G158500	C3H
Prupe.5G158500.14.p	Prupe_5G158500	C3H
Prupe.5G158500.15.p	Prupe_5G158500	C3H
Prupe.5G158500.16.p	Prupe_5G158500	C3H
Prupe.5G158500.17.p	Prupe_5G158500	C3H
Prupe.5G158500.18.p	Prupe_5G158500	C3H
Prupe.5G158500.19.p	Prupe_5G158500	C3H
Prupe.5G158500.1.p	Prupe_5G158500	C3H
Prupe.5G158500.20.p	Prupe_5G158500	C3H
Prupe.5G158500.24.p	Prupe_5G158500	C3H
Prupe.5G158500.25.p	Prupe_5G158500	C3H
Prupe.5G158500.2.p	Prupe_5G158500	C3H
Prupe.5G158500.3.p	Prupe_5G158500	C3H
Prupe.5G158500.4.p	Prupe_5G158500	C3H
Prupe.5G158500.5.p	Prupe_5G158500	C3H
Prupe.5G158500.6.p	Prupe_5G158500	C3H
Prupe.5G158500.7.p	Prupe_5G158500	C3H
Prupe.5G158500.8.p	Prupe_5G158500	C3H
Prupe.5G158600.1.p	Prupe_5G158600	C3H
Prupe.5G158700.1.p	Prupe_5G158700	C3H
Prupe.5G158800.1.p	Prupe_5G158800	C3H
Prupe.5G158900.1.p	Prupe_5G158900	C3H
Prupe.5G159000.1.p	Prupe_5G159000	C3H
Prupe.5G159100.1.p	Prupe_5G159100	C3H
Prupe.5G159100.2.p	Prupe_5G159100	C3H
Prupe.6G014800.1.p	Prupe_6G014800	C3H
Prupe.6G014800.2.p	Prupe_6G014800	C3H
Prupe.6G056300.1.p	Prupe_6G056300	C3H
Prupe.6G159100.1.p	Prupe_6G159100	C3H
Prupe.6G159100.2.p	Prupe_6G159100	C3H
Prupe.6G159100.3.p	Prupe_6G159100	C3H
Prupe.6G243000.1.p	Prupe_6G243000	C3H
Prupe.6G243000.2.p	Prupe_6G243000	C3H
Prupe.6G288300.1.p	Prupe_6G288300	C3H
Prupe.6G288300.2.p	Prupe_6G288300	C3H
Prupe.6G288300.3.p	Prupe_6G288300	C3H
Prupe.6G288300.4.p	Prupe_6G288300	C3H
Prupe.6G307100.1.p	Prupe_6G307100	C3H
Prupe.6G360600.1.p	Prupe_6G360600	C3H
Prupe.7G013500.1.p	Prupe_7G013500	C3H
Prupe.7G065800.1.p	Prupe_7G065800	C3H
Prupe.7G065800.2.p	Prupe_7G065800	C3H
Prupe.7G065800.3.p	Prupe_7G065800	C3H
Prupe.7G076300.1.p	Prupe_7G076300	C3H
Prupe.7G076300.2.p	Prupe_7G076300	C3H
Prupe.7G095500.1.p	Prupe_7G095500	C3H
Prupe.7G207100.10.p	Prupe_7G207100	C3H
Prupe.7G207100.11.p	Prupe_7G207100	C3H
Prupe.7G207100.12.p	Prupe_7G207100	C3H
Prupe.7G207100.13.p	Prupe_7G207100	C3H
Prupe.7G207100.14.p	Prupe_7G207100	C3H
Prupe.7G207100.15.p	Prupe_7G207100	C3H
Prupe.7G207100.16.p	Prupe_7G207100	C3H
Prupe.7G207100.17.p	Prupe_7G207100	C3H
Prupe.7G207100.1.p	Prupe_7G207100	C3H
Prupe.7G207100.2.p	Prupe_7G207100	C3H
Prupe.7G207100.3.p	Prupe_7G207100	C3H
Prupe.7G207100.4.p	Prupe_7G207100	C3H
Prupe.7G207100.5.p	Prupe_7G207100	C3H
Prupe.7G207100.6.p	Prupe_7G207100	C3H
Prupe.7G207100.7.p	Prupe_7G207100	C3H
Prupe.7G207100.8.p	Prupe_7G207100	C3H
Prupe.7G207100.9.p	Prupe_7G207100	C3H
Prupe.7G209200.1.p	Prupe_7G209200	C3H
Prupe.7G216200.1.p	Prupe_7G216200	C3H
Prupe.7G239500.1.p	Prupe_7G239500	C3H
Prupe.7G239900.1.p	Prupe_7G239900	C3H
Prupe.8G067100.1.p	Prupe_8G067100	C3H
Prupe.8G082800.1.p	Prupe_8G082800	C3H
Prupe.8G085700.1.p	Prupe_8G085700	C3H
Prupe.8G254900.1.p	Prupe_8G254900	C3H
Prupe.1G108700.1.p	Prupe_1G108700	CAMTA
Prupe.1G108700.2.p	Prupe_1G108700	CAMTA
Prupe.1G108700.3.p	Prupe_1G108700	CAMTA
Prupe.1G108700.4.p	Prupe_1G108700	CAMTA
Prupe.1G108700.5.p	Prupe_1G108700	CAMTA
Prupe.1G122800.1.p	Prupe_1G122800	CAMTA
Prupe.1G122800.2.p	Prupe_1G122800	CAMTA
Prupe.1G122800.3.p	Prupe_1G122800	CAMTA
Prupe.1G122800.4.p	Prupe_1G122800	CAMTA
Prupe.1G122800.5.p	Prupe_1G122800	CAMTA
Prupe.1G122800.6.p	Prupe_1G122800	CAMTA
Prupe.1G122800.7.p	Prupe_1G122800	CAMTA
Prupe.1G122800.8.p	Prupe_1G122800	CAMTA
Prupe.1G224000.1.p	Prupe_1G224000	CAMTA
Prupe.1G224000.2.p	Prupe_1G224000	CAMTA
Prupe.1G224000.3.p	Prupe_1G224000	CAMTA
Prupe.6G187700.1.p	Prupe_6G187700	CAMTA
Prupe.6G187700.2.p	Prupe_6G187700	CAMTA
Prupe.8G060300.1.p	Prupe_8G060300	CAMTA
Prupe.1G093900.1.p	Prupe_1G093900	CO-like
Prupe.1G219800.1.p	Prupe_1G219800	CO-like
Prupe.1G310900.1.p	Prupe_1G310900	CO-like
Prupe.1G398700.1.p	Prupe_1G398700	CO-like
Prupe.3G194500.1.p	Prupe_3G194500	CO-like
Prupe.3G194500.2.p	Prupe_3G194500	CO-like
Prupe.3G220900.1.p	Prupe_3G220900	CO-like
Prupe.3G245100.1.p	Prupe_3G245100	CO-like
Prupe.5G221000.1.p	Prupe_5G221000	CO-like
Prupe.8G253900.1.p	Prupe_8G253900	CO-like
Prupe.8G253900.2.p	Prupe_8G253900	CO-like
Prupe.1G019100.1.p	Prupe_1G019100	CPP
Prupe.1G019100.2.p	Prupe_1G019100	CPP
Prupe.1G451000.1.p	Prupe_1G451000	CPP
Prupe.1G451000.2.p	Prupe_1G451000	CPP
Prupe.1G473800.1.p	Prupe_1G473800	CPP
Prupe.1G473800.2.p	Prupe_1G473800	CPP
Prupe.1G473800.3.p	Prupe_1G473800	CPP
Prupe.3G078800.10.p	Prupe_3G078800	CPP
Prupe.3G078800.11.p	Prupe_3G078800	CPP
Prupe.3G078800.12.p	Prupe_3G078800	CPP
Prupe.3G078800.13.p	Prupe_3G078800	CPP
Prupe.3G078800.14.p	Prupe_3G078800	CPP
Prupe.3G078800.1.p	Prupe_3G078800	CPP
Prupe.3G078800.2.p	Prupe_3G078800	CPP
Prupe.3G078800.3.p	Prupe_3G078800	CPP
Prupe.3G078800.4.p	Prupe_3G078800	CPP
Prupe.3G078800.5.p	Prupe_3G078800	CPP
Prupe.3G078800.6.p	Prupe_3G078800	CPP
Prupe.3G078800.7.p	Prupe_3G078800	CPP
Prupe.3G078800.8.p	Prupe_3G078800	CPP
Prupe.3G078800.9.p	Prupe_3G078800	CPP
Prupe.6G340600.1.p	Prupe_6G340600	CPP
Prupe.7G233800.1.p	Prupe_7G233800	CPP
Prupe.7G233800.2.p	Prupe_7G233800	CPP
Prupe.7G233800.3.p	Prupe_7G233800	CPP
Prupe.7G233800.4.p	Prupe_7G233800	CPP
Prupe.7G233800.5.p	Prupe_7G233800	CPP
Prupe.1G197100.1.p	Prupe_1G197100	DBB
Prupe.1G371100.1.p	Prupe_1G371100	DBB
Prupe.1G371100.2.p	Prupe_1G371100	DBB
Prupe.1G398700.2.p	Prupe_1G398700	DBB
Prupe.3G155900.1.p	Prupe_3G155900	DBB
Prupe.4G156600.1.p	Prupe_4G156600	DBB
Prupe.7G165700.1.p	Prupe_7G165700	DBB
Prupe.8G085000.1.p	Prupe_8G085000	DBB
Prupe.8G087900.1.p	Prupe_8G087900	DBB
Prupe.1G276000.1.p	Prupe_1G276000	Dof
Prupe.1G388600.1.p	Prupe_1G388600	Dof
Prupe.1G388600.2.p	Prupe_1G388600	Dof
Prupe.2G063800.1.p	Prupe_2G063800	Dof
Prupe.2G192300.1.p	Prupe_2G192300	Dof
Prupe.2G192300.2.p	Prupe_2G192300	Dof
Prupe.2G233600.1.p	Prupe_2G233600	Dof
Prupe.2G233600.2.p	Prupe_2G233600	Dof
Prupe.2G314800.1.p	Prupe_2G314800	Dof
Prupe.2G314800.2.p	Prupe_2G314800	Dof
Prupe.2G314800.3.p	Prupe_2G314800	Dof
Prupe.3G052300.1.p	Prupe_3G052300	Dof
Prupe.3G266200.1.p	Prupe_3G266200	Dof
Prupe.4G042500.1.p	Prupe_4G042500	Dof
Prupe.4G050200.1.p	Prupe_4G050200	Dof
Prupe.4G050200.2.p	Prupe_4G050200	Dof
Prupe.4G050300.1.p	Prupe_4G050300	Dof
Prupe.4G061400.1.p	Prupe_4G061400	Dof
Prupe.5G126800.1.p	Prupe_5G126800	Dof
Prupe.5G173100.1.p	Prupe_5G173100	Dof
Prupe.5G194600.1.p	Prupe_5G194600	Dof
Prupe.5G210200.1.p	Prupe_5G210200	Dof
Prupe.6G079500.1.p	Prupe_6G079500	Dof
Prupe.6G092600.1.p	Prupe_6G092600	Dof
Prupe.6G205200.1.p	Prupe_6G205200	Dof
Prupe.6G253300.1.p	Prupe_6G253300	Dof
Prupe.7G016400.1.p	Prupe_7G016400	Dof
Prupe.7G016400.2.p	Prupe_7G016400	Dof
Prupe.7G093900.1.p	Prupe_7G093900	Dof
Prupe.7G140700.1.p	Prupe_7G140700	Dof
Prupe.7G142500.1.p	Prupe_7G142500	Dof
Prupe.8G022200.1.p	Prupe_8G022200	Dof
Prupe.1G366800.1.p	Prupe_1G366800	E2F/DP
Prupe.1G366800.2.p	Prupe_1G366800	E2F/DP
Prupe.1G366800.3.p	Prupe_1G366800	E2F/DP
Prupe.1G366800.4.p	Prupe_1G366800	E2F/DP
Prupe.1G366800.5.p	Prupe_1G366800	E2F/DP
Prupe.2G325800.1.p	Prupe_2G325800	E2F/DP
Prupe.2G325800.2.p	Prupe_2G325800	E2F/DP
Prupe.2G325800.3.p	Prupe_2G325800	E2F/DP
Prupe.5G180000.1.p	Prupe_5G180000	E2F/DP
Prupe.5G180000.2.p	Prupe_5G180000	E2F/DP
Prupe.5G180000.3.p	Prupe_5G180000	E2F/DP
Prupe.5G180000.4.p	Prupe_5G180000	E2F/DP
Prupe.6G139700.1.p	Prupe_6G139700	E2F/DP
Prupe.6G139900.1.p	Prupe_6G139900	E2F/DP
Prupe.6G139900.2.p	Prupe_6G139900	E2F/DP
Prupe.6G253200.1.p	Prupe_6G253200	E2F/DP
Prupe.6G253200.2.p	Prupe_6G253200	E2F/DP
Prupe.7G098100.1.p	Prupe_7G098100	E2F/DP
Prupe.2G058400.1.p	Prupe_2G058400	EIL
Prupe.2G058500.1.p	Prupe_2G058500	EIL
Prupe.2G070300.1.p	Prupe_2G070300	EIL
Prupe.6G018200.1.p	Prupe_6G018200	EIL
Prupe.6G018200.2.p	Prupe_6G018200	EIL
Prupe.6G181600.1.p	Prupe_6G181600	EIL
Prupe.1G001700.1.p	Prupe_1G001700	ERF
Prupe.1G008400.1.p	Prupe_1G008400	ERF
Prupe.1G037700.1.p	Prupe_1G037700	ERF
Prupe.1G037800.1.p	Prupe_1G037800	ERF
Prupe.1G037900.1.p	Prupe_1G037900	ERF
Prupe.1G084800.1.p	Prupe_1G084800	ERF
Prupe.1G130300.1.p	Prupe_1G130300	ERF
Prupe.1G130300.2.p	Prupe_1G130300	ERF
Prupe.1G139600.1.p	Prupe_1G139600	ERF
Prupe.1G212700.1.p	Prupe_1G212700	ERF
Prupe.1G214900.1.p	Prupe_1G214900	ERF
Prupe.1G245500.1.p	Prupe_1G245500	ERF
Prupe.1G310100.1.p	Prupe_1G310100	ERF
Prupe.1G372100.1.p	Prupe_1G372100	ERF
Prupe.1G390800.1.p	Prupe_1G390800	ERF
Prupe.1G432000.1.p	Prupe_1G432000	ERF
Prupe.1G448600.1.p	Prupe_1G448600	ERF
Prupe.1G464400.1.p	Prupe_1G464400	ERF
Prupe.1G480400.1.p	Prupe_1G480400	ERF
Prupe.1G500900.1.p	Prupe_1G500900	ERF
Prupe.1G513600.1.p	Prupe_1G513600	ERF
Prupe.1G545400.1.p	Prupe_1G545400	ERF
Prupe.1G545700.1.p	Prupe_1G545700	ERF
Prupe.1G546100.1.p	Prupe_1G546100	ERF
Prupe.2G123200.1.p	Prupe_2G123200	ERF
Prupe.2G129300.1.p	Prupe_2G129300	ERF
Prupe.2G129400.1.p	Prupe_2G129400	ERF
Prupe.2G129500.1.p	Prupe_2G129500	ERF
Prupe.2G129600.1.p	Prupe_2G129600	ERF
Prupe.2G129700.1.p	Prupe_2G129700	ERF
Prupe.2G183200.1.p	Prupe_2G183200	ERF
Prupe.2G190200.1.p	Prupe_2G190200	ERF
Prupe.2G253000.1.p	Prupe_2G253000	ERF
Prupe.2G256900.1.p	Prupe_2G256900	ERF
Prupe.2G272300.1.p	Prupe_2G272300	ERF
Prupe.2G272400.1.p	Prupe_2G272400	ERF
Prupe.2G272500.1.p	Prupe_2G272500	ERF
Prupe.2G289500.1.p	Prupe_2G289500	ERF
Prupe.2G289600.1.p	Prupe_2G289600	ERF
Prupe.2G306400.1.p	Prupe_2G306400	ERF
Prupe.3G009400.1.p	Prupe_3G009400	ERF
Prupe.3G019900.1.p	Prupe_3G019900	ERF
Prupe.3G032300.1.p	Prupe_3G032300	ERF
Prupe.3G032300.2.p	Prupe_3G032300	ERF
Prupe.3G032300.3.p	Prupe_3G032300	ERF
Prupe.3G062800.1.p	Prupe_3G062800	ERF
Prupe.3G084600.1.p	Prupe_3G084600	ERF
Prupe.3G094700.1.p	Prupe_3G094700	ERF
Prupe.3G096000.1.p	Prupe_3G096000	ERF
Prupe.3G157100.1.p	Prupe_3G157100	ERF
Prupe.3G209100.1.p	Prupe_3G209100	ERF
Prupe.3G223300.1.p	Prupe_3G223300	ERF
Prupe.3G263000.1.p	Prupe_3G263000	ERF
Prupe.4G051200.1.p	Prupe_4G051200	ERF
Prupe.4G051400.1.p	Prupe_4G051400	ERF
Prupe.4G055500.1.p	Prupe_4G055500	ERF
Prupe.4G055600.1.p	Prupe_4G055600	ERF
Prupe.4G176200.1.p	Prupe_4G176200	ERF
Prupe.4G222300.1.p	Prupe_4G222300	ERF
Prupe.5G061800.1.p	Prupe_5G061800	ERF
Prupe.5G062000.1.p	Prupe_5G062000	ERF
Prupe.5G065300.1.p	Prupe_5G065300	ERF
Prupe.5G089900.1.p	Prupe_5G089900	ERF
Prupe.5G090000.1.p	Prupe_5G090000	ERF
Prupe.5G090100.1.p	Prupe_5G090100	ERF
Prupe.5G090200.1.p	Prupe_5G090200	ERF
Prupe.5G090300.1.p	Prupe_5G090300	ERF
Prupe.5G090400.1.p	Prupe_5G090400	ERF
Prupe.5G090500.1.p	Prupe_5G090500	ERF
Prupe.5G090600.1.p	Prupe_5G090600	ERF
Prupe.5G090700.1.p	Prupe_5G090700	ERF
Prupe.5G090800.1.p	Prupe_5G090800	ERF
Prupe.5G114100.1.p	Prupe_5G114100	ERF
Prupe.5G117800.1.p	Prupe_5G117800	ERF
Prupe.5G136200.1.p	Prupe_5G136200	ERF
Prupe.5G141200.1.p	Prupe_5G141200	ERF
Prupe.5G141300.1.p	Prupe_5G141300	ERF
Prupe.5G213800.1.p	Prupe_5G213800	ERF
Prupe.5G220700.1.p	Prupe_5G220700	ERF
Prupe.5G220700.2.p	Prupe_5G220700	ERF
Prupe.5G220700.3.p	Prupe_5G220700	ERF
Prupe.6G004400.1.p	Prupe_6G004400	ERF
Prupe.6G039700.1.p	Prupe_6G039700	ERF
Prupe.6G064700.1.p	Prupe_6G064700	ERF
Prupe.6G064700.2.p	Prupe_6G064700	ERF
Prupe.6G064700.3.p	Prupe_6G064700	ERF
Prupe.6G064700.4.p	Prupe_6G064700	ERF
Prupe.6G064700.5.p	Prupe_6G064700	ERF
Prupe.6G165700.1.p	Prupe_6G165700	ERF
Prupe.6G176400.1.p	Prupe_6G176400	ERF
Prupe.6G182200.1.p	Prupe_6G182200	ERF
Prupe.6G231500.1.p	Prupe_6G231500	ERF
Prupe.6G284400.1.p	Prupe_6G284400	ERF
Prupe.6G284400.2.p	Prupe_6G284400	ERF
Prupe.6G348700.1.p	Prupe_6G348700	ERF
Prupe.6G354000.1.p	Prupe_6G354000	ERF
Prupe.7G004900.1.p	Prupe_7G004900	ERF
Prupe.7G060700.1.p	Prupe_7G060700	ERF
Prupe.7G066700.1.p	Prupe_7G066700	ERF
Prupe.7G115900.1.p	Prupe_7G115900	ERF
Prupe.7G116300.1.p	Prupe_7G116300	ERF
Prupe.7G134100.1.p	Prupe_7G134100	ERF
Prupe.7G194400.1.p	Prupe_7G194400	ERF
Prupe.7G222700.1.p	Prupe_7G222700	ERF
Prupe.7G243600.1.p	Prupe_7G243600	ERF
Prupe.8G125100.1.p	Prupe_8G125100	ERF
Prupe.8G198700.1.p	Prupe_8G198700	ERF
Prupe.8G198700.2.p	Prupe_8G198700	ERF
Prupe.8G198700.3.p	Prupe_8G198700	ERF
Prupe.8G198700.4.p	Prupe_8G198700	ERF
Prupe.8G198700.5.p	Prupe_8G198700	ERF
Prupe.8G224600.1.p	Prupe_8G224600	ERF
Prupe.8G224700.1.p	Prupe_8G224700	ERF
Prupe.8G224800.1.p	Prupe_8G224800	ERF
Prupe.8G230600.1.p	Prupe_8G230600	ERF
Prupe.8G264900.1.p	Prupe_8G264900	ERF
TF_ID	Gene_ID	Family
Prupe.1G074100.1.p	Prupe_1G074100	FAR1
Prupe.1G125700.1.p	Prupe_1G125700	FAR1
Prupe.1G125700.2.p	Prupe_1G125700	FAR1
Prupe.1G125700.3.p	Prupe_1G125700	FAR1
Prupe.1G125700.4.p	Prupe_1G125700	FAR1
Prupe.1G148400.1.p	Prupe_1G148400	FAR1
Prupe.1G148400.2.p	Prupe_1G148400	FAR1
Prupe.1G194600.1.p	Prupe_1G194600	FAR1
Prupe.1G195600.10.p	Prupe_1G195600	FAR1
Prupe.1G195600.1.p	Prupe_1G195600	FAR1
Prupe.1G195600.2.p	Prupe_1G195600	FAR1
Prupe.1G195600.3.p	Prupe_1G195600	FAR1
Prupe.1G195600.4.p	Prupe_1G195600	FAR1
Prupe.1G195600.5.p	Prupe_1G195600	FAR1
Prupe.1G195600.6.p	Prupe_1G195600	FAR1
Prupe.1G195600.7.p	Prupe_1G195600	FAR1
Prupe.1G195600.8.p	Prupe_1G195600	FAR1
Prupe.1G195600.9.p	Prupe_1G195600	FAR1
Prupe.1G195700.1.p	Prupe_1G195700	FAR1
Prupe.1G195700.2.p	Prupe_1G195700	FAR1
Prupe.1G195800.1.p	Prupe_1G195800	FAR1
Prupe.1G195800.2.p	Prupe_1G195800	FAR1
Prupe.1G195900.1.p	Prupe_1G195900	FAR1
Prupe.1G195900.2.p	Prupe_1G195900	FAR1
Prupe.1G195900.3.p	Prupe_1G195900	FAR1
Prupe.1G195900.4.p	Prupe_1G195900	FAR1
Prupe.1G195900.5.p	Prupe_1G195900	FAR1
Prupe.1G195900.6.p	Prupe_1G195900	FAR1
Prupe.1G196000.1.p	Prupe_1G196000	FAR1
Prupe.1G196000.2.p	Prupe_1G196000	FAR1
Prupe.1G196000.3.p	Prupe_1G196000	FAR1
Prupe.1G196000.4.p	Prupe_1G196000	FAR1
Prupe.1G196000.5.p	Prupe_1G196000	FAR1
Prupe.1G196000.6.p	Prupe_1G196000	FAR1
Prupe.1G196000.7.p	Prupe_1G196000	FAR1
Prupe.1G196400.1.p	Prupe_1G196400	FAR1
Prupe.1G223100.1.p	Prupe_1G223100	FAR1
Prupe.1G482700.1.p	Prupe_1G482700	FAR1
Prupe.1G583000.1.p	Prupe_1G583000	FAR1
Prupe.2G013600.1.p	Prupe_2G013600	FAR1
Prupe.2G058900.10.p	Prupe_2G058900	FAR1
Prupe.2G058900.11.p	Prupe_2G058900	FAR1
Prupe.2G058900.12.p	Prupe_2G058900	FAR1
Prupe.2G058900.13.p	Prupe_2G058900	FAR1
Prupe.2G058900.14.p	Prupe_2G058900	FAR1
Prupe.2G058900.15.p	Prupe_2G058900	FAR1
Prupe.2G058900.16.p	Prupe_2G058900	FAR1
Prupe.2G058900.1.p	Prupe_2G058900	FAR1
Prupe.2G058900.2.p	Prupe_2G058900	FAR1
Prupe.2G058900.3.p	Prupe_2G058900	FAR1
Prupe.2G058900.4.p	Prupe_2G058900	FAR1
Prupe.2G058900.5.p	Prupe_2G058900	FAR1
Prupe.2G058900.6.p	Prupe_2G058900	FAR1
Prupe.2G058900.7.p	Prupe_2G058900	FAR1
Prupe.2G058900.8.p	Prupe_2G058900	FAR1
Prupe.2G058900.9.p	Prupe_2G058900	FAR1
Prupe.2G091000.1.p	Prupe_2G091000	FAR1
Prupe.2G147900.1.p	Prupe_2G147900	FAR1
Prupe.2G291000.1.p	Prupe_2G291000	FAR1
Prupe.2G327900.1.p	Prupe_2G327900	FAR1
Prupe.3G021400.1.p	Prupe_3G021400	FAR1
Prupe.3G090300.1.p	Prupe_3G090300	FAR1
Prupe.3G090300.2.p	Prupe_3G090300	FAR1
Prupe.3G090400.1.p	Prupe_3G090400	FAR1
Prupe.3G090400.2.p	Prupe_3G090400	FAR1
Prupe.3G090500.1.p	Prupe_3G090500	FAR1
Prupe.3G154400.1.p	Prupe_3G154400	FAR1
Prupe.3G186000.10.p	Prupe_3G186000	FAR1
Prupe.3G186000.11.p	Prupe_3G186000	FAR1
Prupe.3G186000.1.p	Prupe_3G186000	FAR1
Prupe.3G186000.2.p	Prupe_3G186000	FAR1
Prupe.3G186000.3.p	Prupe_3G186000	FAR1
Prupe.3G186000.4.p	Prupe_3G186000	FAR1
Prupe.3G186000.5.p	Prupe_3G186000	FAR1
Prupe.3G186000.6.p	Prupe_3G186000	FAR1
Prupe.3G186000.7.p	Prupe_3G186000	FAR1
Prupe.3G186000.8.p	Prupe_3G186000	FAR1
Prupe.3G186000.9.p	Prupe_3G186000	FAR1
Prupe.3G186100.1.p	Prupe_3G186100	FAR1
Prupe.3G186100.2.p	Prupe_3G186100	FAR1
Prupe.3G186100.3.p	Prupe_3G186100	FAR1
Prupe.3G186100.4.p	Prupe_3G186100	FAR1
Prupe.3G186200.1.p	Prupe_3G186200	FAR1
Prupe.3G186200.2.p	Prupe_3G186200	FAR1
Prupe.3G186200.3.p	Prupe_3G186200	FAR1
Prupe.3G186200.4.p	Prupe_3G186200	FAR1
Prupe.3G198400.1.p	Prupe_3G198400	FAR1
Prupe.3G198400.2.p	Prupe_3G198400	FAR1
Prupe.3G198400.3.p	Prupe_3G198400	FAR1
Prupe.3G198400.4.p	Prupe_3G198400	FAR1
Prupe.3G257900.1.p	Prupe_3G257900	FAR1
Prupe.4G006000.1.p	Prupe_4G006000	FAR1
Prupe.4G006000.2.p	Prupe_4G006000	FAR1
Prupe.4G006000.3.p	Prupe_4G006000	FAR1
Prupe.4G006000.4.p	Prupe_4G006000	FAR1
Prupe.4G006000.5.p	Prupe_4G006000	FAR1
Prupe.4G006000.6.p	Prupe_4G006000	FAR1
Prupe.4G115100.1.p	Prupe_4G115100	FAR1
Prupe.4G115100.2.p	Prupe_4G115100	FAR1
Prupe.4G115100.3.p	Prupe_4G115100	FAR1
Prupe.4G115100.4.p	Prupe_4G115100	FAR1
Prupe.4G115100.5.p	Prupe_4G115100	FAR1
Prupe.4G115100.6.p	Prupe_4G115100	FAR1
Prupe.4G246500.1.p	Prupe_4G246500	FAR1
Prupe.4G256500.1.p	Prupe_4G256500	FAR1
Prupe.4G265400.1.p	Prupe_4G265400	FAR1
Prupe.4G268600.1.p	Prupe_4G268600	FAR1
Prupe.5G003600.1.p	Prupe_5G003600	FAR1
Prupe.5G010000.1.p	Prupe_5G010000	FAR1
Prupe.5G010000.2.p	Prupe_5G010000	FAR1
Prupe.5G036100.1.p	Prupe_5G036100	FAR1
Prupe.5G053800.1.p	Prupe_5G053800	FAR1
Prupe.5G094100.1.p	Prupe_5G094100	FAR1
Prupe.6G011300.1.p	Prupe_6G011300	FAR1
Prupe.6G116200.1.p	Prupe_6G116200	FAR1
Prupe.6G364200.1.p	Prupe_6G364200	FAR1
Prupe.6G364300.1.p	Prupe_6G364300	FAR1
Prupe.7G015200.1.p	Prupe_7G015200	FAR1
Prupe.7G064500.1.p	Prupe_7G064500	FAR1
Prupe.7G161400.1.p	Prupe_7G161400	FAR1
Prupe.7G161500.1.p	Prupe_7G161500	FAR1
Prupe.7G188000.1.p	Prupe_7G188000	FAR1
Prupe.8G014900.1.p	Prupe_8G014900	FAR1
Prupe.8G037300.1.p	Prupe_8G037300	FAR1
Prupe.8G182700.1.p	Prupe_8G182700	FAR1
Prupe.8G182700.2.p	Prupe_8G182700	FAR1
Prupe.8G182700.3.p	Prupe_8G182700	FAR1
Prupe.8G188300.1.p	Prupe_8G188300	FAR1
Prupe.8G188400.1.p	Prupe_8G188400	FAR1
Prupe.8G188500.1.p	Prupe_8G188500	FAR1
Prupe.8G188600.1.p	Prupe_8G188600	FAR1
Prupe.I001300.1.p	Prupe_I001300	FAR1
Prupe.1G007000.1.p	Prupe_1G007000	G2-like
Prupe.1G238200.4.p	Prupe_1G238200	G2-like
Prupe.1G238200.5.p	Prupe_1G238200	G2-like
Prupe.1G275900.1.p	Prupe_1G275900	G2-like
Prupe.1G306300.1.p	Prupe_1G306300	G2-like
Prupe.1G340500.1.p	Prupe_1G340500	G2-like
Prupe.1G340500.2.p	Prupe_1G340500	G2-like
Prupe.1G387800.1.p	Prupe_1G387800	G2-like
Prupe.1G391400.2.p	Prupe_1G391400	G2-like
Prupe.2G229300.1.p	Prupe_2G229300	G2-like
Prupe.2G229300.2.p	Prupe_2G229300	G2-like
Prupe.2G253700.1.p	Prupe_2G253700	G2-like
Prupe.3G027400.10.p	Prupe_3G027400	G2-like
Prupe.3G027400.11.p	Prupe_3G027400	G2-like
Prupe.3G027400.1.p	Prupe_3G027400	G2-like
Prupe.3G027400.2.p	Prupe_3G027400	G2-like
Prupe.3G027400.3.p	Prupe_3G027400	G2-like
Prupe.3G027400.4.p	Prupe_3G027400	G2-like
Prupe.3G027400.5.p	Prupe_3G027400	G2-like
Prupe.3G027400.6.p	Prupe_3G027400	G2-like
Prupe.3G027400.7.p	Prupe_3G027400	G2-like
Prupe.3G027400.8.p	Prupe_3G027400	G2-like
Prupe.3G027400.9.p	Prupe_3G027400	G2-like
Prupe.3G116700.1.p	Prupe_3G116700	G2-like
Prupe.3G116700.2.p	Prupe_3G116700	G2-like
Prupe.3G127700.1.p	Prupe_3G127700	G2-like
Prupe.3G163500.1.p	Prupe_3G163500	G2-like
Prupe.3G163500.2.p	Prupe_3G163500	G2-like
Prupe.3G163500.3.p	Prupe_3G163500	G2-like
Prupe.3G178600.1.p	Prupe_3G178600	G2-like
Prupe.3G178600.2.p	Prupe_3G178600	G2-like
Prupe.3G192100.1.p	Prupe_3G192100	G2-like
Prupe.3G248500.1.p	Prupe_3G248500	G2-like
Prupe.4G000700.1.p	Prupe_4G000700	G2-like
Prupe.4G000700.2.p	Prupe_4G000700	G2-like
Prupe.4G000700.3.p	Prupe_4G000700	G2-like
Prupe.4G000700.4.p	Prupe_4G000700	G2-like
Prupe.4G000700.5.p	Prupe_4G000700	G2-like
Prupe.4G000700.6.p	Prupe_4G000700	G2-like
Prupe.4G000700.7.p	Prupe_4G000700	G2-like
Prupe.4G000700.8.p	Prupe_4G000700	G2-like
Prupe.4G000700.9.p	Prupe_4G000700	G2-like
Prupe.4G000800.1.p	Prupe_4G000800	G2-like
Prupe.4G000800.2.p	Prupe_4G000800	G2-like
Prupe.4G000800.3.p	Prupe_4G000800	G2-like
Prupe.4G000800.4.p	Prupe_4G000800	G2-like
Prupe.4G018700.1.p	Prupe_4G018700	G2-like
Prupe.4G062400.1.p	Prupe_4G062400	G2-like
Prupe.4G062400.2.p	Prupe_4G062400	G2-like
Prupe.4G062400.3.p	Prupe_4G062400	G2-like
Prupe.4G062400.4.p	Prupe_4G062400	G2-like
Prupe.4G062400.5.p	Prupe_4G062400	G2-like
Prupe.4G062400.6.p	Prupe_4G062400	G2-like
Prupe.4G062400.7.p	Prupe_4G062400	G2-like
Prupe.4G128000.1.p	Prupe_4G128000	G2-like
Prupe.5G023700.1.p	Prupe_5G023700	G2-like
Prupe.5G023700.2.p	Prupe_5G023700	G2-like
Prupe.5G023700.3.p	Prupe_5G023700	G2-like
Prupe.5G028400.1.p	Prupe_5G028400	G2-like
Prupe.5G028400.2.p	Prupe_5G028400	G2-like
Prupe.5G028400.3.p	Prupe_5G028400	G2-like
Prupe.5G028400.4.p	Prupe_5G028400	G2-like
Prupe.5G028400.5.p	Prupe_5G028400	G2-like
Prupe.5G028400.6.p	Prupe_5G028400	G2-like
Prupe.5G238100.1.p	Prupe_5G238100	G2-like
Prupe.6G071400.1.p	Prupe_6G071400	G2-like
Prupe.6G071400.2.p	Prupe_6G071400	G2-like
Prupe.6G071400.3.p	Prupe_6G071400	G2-like
Prupe.6G254900.1.p	Prupe_6G254900	G2-like
Prupe.6G254900.2.p	Prupe_6G254900	G2-like
Prupe.6G278300.1.p	Prupe_6G278300	G2-like
Prupe.6G282300.1.p	Prupe_6G282300	G2-like
Prupe.6G282300.2.p	Prupe_6G282300	G2-like
Prupe.6G351000.1.p	Prupe_6G351000	G2-like
Prupe.6G351000.2.p	Prupe_6G351000	G2-like
Prupe.6G351000.3.p	Prupe_6G351000	G2-like
Prupe.6G351000.4.p	Prupe_6G351000	G2-like
Prupe.6G351000.5.p	Prupe_6G351000	G2-like
Prupe.7G001700.1.p	Prupe_7G001700	G2-like
Prupe.7G023300.1.p	Prupe_7G023300	G2-like
Prupe.7G023300.2.p	Prupe_7G023300	G2-like
Prupe.7G023300.3.p	Prupe_7G023300	G2-like
Prupe.7G023300.5.p	Prupe_7G023300	G2-like
Prupe.7G023300.7.p	Prupe_7G023300	G2-like
Prupe.7G023300.8.p	Prupe_7G023300	G2-like
Prupe.7G027500.1.p	Prupe_7G027500	G2-like
Prupe.7G075300.1.p	Prupe_7G075300	G2-like
Prupe.7G075300.2.p	Prupe_7G075300	G2-like
Prupe.7G138100.1.p	Prupe_7G138100	G2-like
Prupe.7G138100.2.p	Prupe_7G138100	G2-like
Prupe.7G235900.1.p	Prupe_7G235900	G2-like
Prupe.8G116200.1.p	Prupe_8G116200	G2-like
Prupe.8G116200.2.p	Prupe_8G116200	G2-like
Prupe.8G216800.1.p	Prupe_8G216800	G2-like
Prupe.8G216800.2.p	Prupe_8G216800	G2-like
Prupe.8G216800.3.p	Prupe_8G216800	G2-like
Prupe.8G216800.4.p	Prupe_8G216800	G2-like
Prupe.8G216800.5.p	Prupe_8G216800	G2-like
Prupe.1G126000.1.p	Prupe_1G126000	GATA
Prupe.1G412000.1.p	Prupe_1G412000	GATA
Prupe.1G447300.1.p	Prupe_1G447300	GATA
Prupe.1G447400.1.p	Prupe_1G447400	GATA
Prupe.1G534300.1.p	Prupe_1G534300	GATA
Prupe.1G534400.1.p	Prupe_1G534400	GATA
Prupe.2G135400.1.p	Prupe_2G135400	GATA
Prupe.2G212900.1.p	Prupe_2G212900	GATA
Prupe.2G212900.2.p	Prupe_2G212900	GATA
Prupe.3G019800.1.p	Prupe_3G019800	GATA
Prupe.3G019800.2.p	Prupe_3G019800	GATA
Prupe.3G019800.3.p	Prupe_3G019800	GATA
Prupe.3G060900.1.p	Prupe_3G060900	GATA
Prupe.5G058300.1.p	Prupe_5G058300	GATA
Prupe.5G058300.2.p	Prupe_5G058300	GATA
Prupe.5G058300.3.p	Prupe_5G058300	GATA
Prupe.6G102900.1.p	Prupe_6G102900	GATA
Prupe.6G102900.2.p	Prupe_6G102900	GATA
Prupe.6G316000.1.p	Prupe_6G316000	GATA
Prupe.7G155400.1.p	Prupe_7G155400	GATA
Prupe.7G164500.1.p	Prupe_7G164500	GATA
Prupe.7G210100.1.p	Prupe_7G210100	GATA
Prupe.8G071200.1.p	Prupe_8G071200	GATA
Prupe.8G071200.2.p	Prupe_8G071200	GATA
Prupe.8G071200.3.p	Prupe_8G071200	GATA
Prupe.8G071300.1.p	Prupe_8G071300	GATA
Prupe.8G071300.2.p	Prupe_8G071300	GATA
Prupe.8G071300.3.p	Prupe_8G071300	GATA
Prupe.8G071300.4.p	Prupe_8G071300	GATA
Prupe.8G086100.1.p	Prupe_8G086100	GATA
Prupe.8G268900.1.p	Prupe_8G268900	GATA
Prupe.3G046700.1.p	Prupe_3G046700	GeBP
Prupe.3G161700.1.p	Prupe_3G161700	GeBP
Prupe.3G222100.1.p	Prupe_3G222100	GeBP
Prupe.4G029400.1.p	Prupe_4G029400	GeBP
Prupe.4G287400.1.p	Prupe_4G287400	GeBP
Prupe.6G338700.1.p	Prupe_6G338700	GeBP
Prupe.6G338800.1.p	Prupe_6G338800	GeBP
Prupe.6G338800.2.p	Prupe_6G338800	GeBP
Prupe.7G003400.1.p	Prupe_7G003400	GeBP
Prupe.1G119100.1.p	Prupe_1G119100	GRAS
Prupe.1G119200.1.p	Prupe_1G119200	GRAS
Prupe.1G199300.1.p	Prupe_1G199300	GRAS
Prupe.1G237500.1.p	Prupe_1G237500	GRAS
Prupe.1G329600.1.p	Prupe_1G329600	GRAS
Prupe.1G501500.1.p	Prupe_1G501500	GRAS
Prupe.2G028700.10.p	Prupe_2G028700	GRAS
Prupe.2G028700.1.p	Prupe_2G028700	GRAS
Prupe.2G028700.2.p	Prupe_2G028700	GRAS
Prupe.2G028700.3.p	Prupe_2G028700	GRAS
Prupe.2G028700.4.p	Prupe_2G028700	GRAS
Prupe.2G028700.5.p	Prupe_2G028700	GRAS
Prupe.2G028700.6.p	Prupe_2G028700	GRAS
Prupe.2G028700.7.p	Prupe_2G028700	GRAS
Prupe.2G028700.8.p	Prupe_2G028700	GRAS
Prupe.2G028700.9.p	Prupe_2G028700	GRAS
Prupe.2G138400.1.p	Prupe_2G138400	GRAS
Prupe.2G138400.2.p	Prupe_2G138400	GRAS
Prupe.2G138400.3.p	Prupe_2G138400	GRAS
Prupe.2G138400.4.p	Prupe_2G138400	GRAS
Prupe.2G138400.5.p	Prupe_2G138400	GRAS
Prupe.2G138400.6.p	Prupe_2G138400	GRAS
Prupe.2G237300.1.p	Prupe_2G237300	GRAS
Prupe.2G299400.1.p	Prupe_2G299400	GRAS
Prupe.3G040400.1.p	Prupe_3G040400	GRAS
Prupe.3G162500.1.p	Prupe_3G162500	GRAS
Prupe.3G187000.1.p	Prupe_3G187000	GRAS
Prupe.3G201900.1.p	Prupe_3G201900	GRAS
Prupe.3G201900.2.p	Prupe_3G201900	GRAS
Prupe.3G201900.3.p	Prupe_3G201900	GRAS
Prupe.3G201900.4.p	Prupe_3G201900	GRAS
Prupe.3G201900.5.p	Prupe_3G201900	GRAS
Prupe.3G222800.1.p	Prupe_3G222800	GRAS
Prupe.3G249700.1.p	Prupe_3G249700	GRAS
Prupe.3G309800.1.p	Prupe_3G309800	GRAS
Prupe.4G007500.1.p	Prupe_4G007500	GRAS
Prupe.4G132100.1.p	Prupe_4G132100	GRAS
Prupe.4G200200.1.p	Prupe_4G200200	GRAS
Prupe.4G200200.2.p	Prupe_4G200200	GRAS
Prupe.4G233000.1.p	Prupe_4G233000	GRAS
Prupe.4G233000.2.p	Prupe_4G233000	GRAS
Prupe.4G233000.3.p	Prupe_4G233000	GRAS
Prupe.4G233000.4.p	Prupe_4G233000	GRAS
Prupe.4G233000.5.p	Prupe_4G233000	GRAS
Prupe.4G233000.6.p	Prupe_4G233000	GRAS
Prupe.4G233000.7.p	Prupe_4G233000	GRAS
Prupe.4G258200.1.p	Prupe_4G258200	GRAS
Prupe.5G072300.1.p	Prupe_5G072300	GRAS
Prupe.5G072300.2.p	Prupe_5G072300	GRAS
Prupe.5G091700.1.p	Prupe_5G091700	GRAS
Prupe.5G156100.1.p	Prupe_5G156100	GRAS
Prupe.6G037000.1.p	Prupe_6G037000	GRAS
Prupe.6G073300.1.p	Prupe_6G073300	GRAS
Prupe.6G073400.1.p	Prupe_6G073400	GRAS
Prupe.6G073400.2.p	Prupe_6G073400	GRAS
Prupe.6G073500.1.p	Prupe_6G073500	GRAS
Prupe.6G073600.1.p	Prupe_6G073600	GRAS
Prupe.6G073700.1.p	Prupe_6G073700	GRAS
Prupe.6G073800.1.p	Prupe_6G073800	GRAS
Prupe.6G073900.1.p	Prupe_6G073900	GRAS
Prupe.6G074000.1.p	Prupe_6G074000	GRAS
Prupe.6G220800.1.p	Prupe_6G220800	GRAS
Prupe.6G223200.1.p	Prupe_6G223200	GRAS
Prupe.6G257000.1.p	Prupe_6G257000	GRAS
Prupe.6G257000.2.p	Prupe_6G257000	GRAS
Prupe.6G257000.3.p	Prupe_6G257000	GRAS
Prupe.6G257000.4.p	Prupe_6G257000	GRAS
Prupe.6G282800.1.p	Prupe_6G282800	GRAS
Prupe.6G300900.1.p	Prupe_6G300900	GRAS
Prupe.7G150900.1.p	Prupe_7G150900	GRAS
Prupe.7G153700.1.p	Prupe_7G153700	GRAS
Prupe.7G153700.2.p	Prupe_7G153700	GRAS
Prupe.7G153700.3.p	Prupe_7G153700	GRAS
Prupe.7G236100.1.p	Prupe_7G236100	GRAS
Prupe.8G016200.1.p	Prupe_8G016200	GRAS
Prupe.8G016200.2.p	Prupe_8G016200	GRAS
Prupe.8G016200.3.p	Prupe_8G016200	GRAS
Prupe.8G016200.4.p	Prupe_8G016200	GRAS
Prupe.8G054000.1.p	Prupe_8G054000	GRAS
Prupe.8G220900.1.p	Prupe_8G220900	GRAS
Prupe.8G266100.1.p	Prupe_8G266100	GRAS
Prupe.I004400.1.p	Prupe_I004400	GRAS
Prupe.I004500.1.p	Prupe_I004500	GRAS
Prupe.1G419000.1.p	Prupe_1G419000	GRF
Prupe.1G419000.2.p	Prupe_1G419000	GRF
Prupe.2G148100.1.p	Prupe_2G148100	GRF
Prupe.2G317500.1.p	Prupe_2G317500	GRF
Prupe.2G317500.3.p	Prupe_2G317500	GRF
Prupe.2G317500.4.p	Prupe_2G317500	GRF
Prupe.2G329200.1.p	Prupe_2G329200	GRF
Prupe.2G329200.2.p	Prupe_2G329200	GRF
Prupe.2G329200.3.p	Prupe_2G329200	GRF
Prupe.3G041800.1.p	Prupe_3G041800	GRF
Prupe.5G021400.1.p	Prupe_5G021400	GRF
Prupe.5G131600.1.p	Prupe_5G131600	GRF
Prupe.5G131600.2.p	Prupe_5G131600	GRF
Prupe.6G217000.1.p	Prupe_6G217000	GRF
Prupe.7G115500.1.p	Prupe_7G115500	GRF
Prupe.7G115500.2.p	Prupe_7G115500	GRF
Prupe.7G201000.1.p	Prupe_7G201000	GRF
Prupe.1G075500.5.p	Prupe_1G075500	HB-other
Prupe.1G478200.1.p	Prupe_1G478200	HB-other
Prupe.3G029400.1.p	Prupe_3G029400	HB-other
Prupe.3G029400.2.p	Prupe_3G029400	HB-other
Prupe.3G029400.4.p	Prupe_3G029400	HB-other
Prupe.3G029400.5.p	Prupe_3G029400	HB-other
Prupe.3G029400.6.p	Prupe_3G029400	HB-other
Prupe.3G060300.1.p	Prupe_3G060300	HB-other
Prupe.3G060300.2.p	Prupe_3G060300	HB-other
Prupe.3G060300.3.p	Prupe_3G060300	HB-other
Prupe.4G052600.1.p	Prupe_4G052600	HB-other
Prupe.4G172900.1.p	Prupe_4G172900	HB-other
Prupe.4G172900.2.p	Prupe_4G172900	HB-other
Prupe.4G267700.1.p	Prupe_4G267700	HB-other
Prupe.4G267700.2.p	Prupe_4G267700	HB-other
Prupe.8G255600.1.p	Prupe_8G255600	HB-other
Prupe.8G255600.2.p	Prupe_8G255600	HB-other
Prupe.8G267900.2.p	Prupe_8G267900	HB-other
Prupe.8G267900.3.p	Prupe_8G267900	HB-other
Prupe.8G267900.4.p	Prupe_8G267900	HB-other
Prupe.8G267900.5.p	Prupe_8G267900	HB-other
Prupe.8G267900.6.p	Prupe_8G267900	HB-other
Prupe.8G267900.8.p	Prupe_8G267900	HB-other
Prupe.1G075500.4.p	Prupe_1G075500	HB-PHD
Prupe.1G075500.1.p	Prupe_1G075500	HB-PHD
Prupe.8G137800.3.p	Prupe_8G137800	HB-PHD
Prupe.8G137800.4.p	Prupe_8G137800	HB-PHD
Prupe.8G137800.5.p	Prupe_8G137800	HB-PHD
Prupe.8G137800.6.p	Prupe_8G137800	HB-PHD
Prupe.8G137800.1.p	Prupe_8G137800	HB-PHD
Prupe.8G137800.2.p	Prupe_8G137800	HB-PHD
Prupe.8G137800.7.p	Prupe_8G137800	HB-PHD
Prupe.8G137800.8.p	Prupe_8G137800	HB-PHD
Prupe.8G137800.9.p	Prupe_8G137800	HB-PHD
Prupe.3G283200.1.p	Prupe_3G283200	HD-ZIP
Prupe.1G271400.1.p	Prupe_1G271400	HD-ZIP
Prupe.1G271400.2.p	Prupe_1G271400	HD-ZIP
Prupe.6G193400.2.p	Prupe_6G193400	HD-ZIP
Prupe.6G193400.1.p	Prupe_6G193400	HD-ZIP
Prupe.1G523000.1.p	Prupe_1G523000	HD-ZIP
Prupe.3G269900.1.p	Prupe_3G269900	HD-ZIP
Prupe.3G269900.2.p	Prupe_3G269900	HD-ZIP
Prupe.5G064300.1.p	Prupe_5G064300	HD-ZIP
Prupe.5G185900.1.p	Prupe_5G185900	HD-ZIP
Prupe.1G267300.3.p	Prupe_1G267300	HD-ZIP
Prupe.1G267300.2.p	Prupe_1G267300	HD-ZIP
Prupe.1G267300.1.p	Prupe_1G267300	HD-ZIP
Prupe.7G079300.1.p	Prupe_7G079300	HD-ZIP
Prupe.2G004000.6.p	Prupe_2G004000	HD-ZIP
Prupe.2G004000.5.p	Prupe_2G004000	HD-ZIP
Prupe.2G004000.4.p	Prupe_2G004000	HD-ZIP
Prupe.2G004000.2.p	Prupe_2G004000	HD-ZIP
Prupe.2G004000.3.p	Prupe_2G004000	HD-ZIP
Prupe.2G004000.1.p	Prupe_2G004000	HD-ZIP
Prupe.6G213800.1.p	Prupe_6G213800	HD-ZIP
Prupe.2G127300.1.p	Prupe_2G127300	HD-ZIP
Prupe.2G316600.1.p	Prupe_2G316600	HD-ZIP
Prupe.7G079300.2.p	Prupe_7G079300	HD-ZIP
Prupe.1G416800.1.p	Prupe_1G416800	HD-ZIP
Prupe.2G194400.1.p	Prupe_2G194400	HD-ZIP
Prupe.7G121100.1.p	Prupe_7G121100	HD-ZIP
Prupe.1G325000.2.p	Prupe_1G325000	HD-ZIP
Prupe.1G325000.1.p	Prupe_1G325000	HD-ZIP
Prupe.7G149700.1.p	Prupe_7G149700	HD-ZIP
Prupe.1G068400.1.p	Prupe_1G068400	HD-ZIP
Prupe.4G174000.1.p	Prupe_4G174000	HD-ZIP
Prupe.3G067200.1.p	Prupe_3G067200	HD-ZIP
Prupe.4G024800.1.p	Prupe_4G024800	HD-ZIP
Prupe.4G024800.2.p	Prupe_4G024800	HD-ZIP
Prupe.4G024800.3.p	Prupe_4G024800	HD-ZIP
Prupe.3G218500.3.p	Prupe_3G218500	HD-ZIP
Prupe.3G218500.2.p	Prupe_3G218500	HD-ZIP
Prupe.3G218500.4.p	Prupe_3G218500	HD-ZIP
Prupe.3G218500.1.p	Prupe_3G218500	HD-ZIP
Prupe.2G156900.1.p	Prupe_2G156900	HD-ZIP
Prupe.1G447100.1.p	Prupe_1G447100	HD-ZIP
Prupe.1G447100.2.p	Prupe_1G447100	HD-ZIP
Prupe.5G240900.1.p	Prupe_5G240900	HD-ZIP
Prupe.2G291400.1.p	Prupe_2G291400	HD-ZIP
Prupe.4G090100.1.p	Prupe_4G090100	HD-ZIP
Prupe.3G060700.1.p	Prupe_3G060700	HD-ZIP
Prupe.2G156900.2.p	Prupe_2G156900	HD-ZIP
Prupe.6G102300.1.p	Prupe_6G102300	HD-ZIP
Prupe.5G029000.1.p	Prupe_5G029000	HD-ZIP
Prupe.3G015300.1.p	Prupe_3G015300	HD-ZIP
Prupe.7G212600.1.p	Prupe_7G212600	HRT-like
Prupe.1G021200.1.p	Prupe_1G021200	HSF
Prupe.1G165500.1.p	Prupe_1G165500	HSF
Prupe.1G335100.1.p	Prupe_1G335100	HSF
Prupe.1G410400.1.p	Prupe_1G410400	HSF
Prupe.1G410400.2.p	Prupe_1G410400	HSF
Prupe.1G410400.3.p	Prupe_1G410400	HSF
Prupe.1G410400.4.p	Prupe_1G410400	HSF
Prupe.1G410400.5.p	Prupe_1G410400	HSF
Prupe.1G410400.6.p	Prupe_1G410400	HSF
Prupe.1G410400.7.p	Prupe_1G410400	HSF
Prupe.1G410400.8.p	Prupe_1G410400	HSF
Prupe.1G433500.1.p	Prupe_1G433500	HSF
Prupe.2G292100.1.p	Prupe_2G292100	HSF
Prupe.3G108700.1.p	Prupe_3G108700	HSF
Prupe.4G046000.1.p	Prupe_4G046000	HSF
Prupe.4G046000.2.p	Prupe_4G046000	HSF
Prupe.4G068100.1.p	Prupe_4G068100	HSF
Prupe.4G068100.3.p	Prupe_4G068100	HSF
Prupe.4G068100.5.p	Prupe_4G068100	HSF
Prupe.4G144200.1.p	Prupe_4G144200	HSF
Prupe.4G144200.2.p	Prupe_4G144200	HSF
Prupe.5G031100.1.p	Prupe_5G031100	HSF
Prupe.5G093200.1.p	Prupe_5G093200	HSF
Prupe.5G093200.2.p	Prupe_5G093200	HSF
Prupe.5G093200.3.p	Prupe_5G093200	HSF
Prupe.5G093200.4.p	Prupe_5G093200	HSF
Prupe.5G093200.5.p	Prupe_5G093200	HSF
Prupe.7G056700.1.p	Prupe_7G056700	HSF
Prupe.7G117200.1.p	Prupe_7G117200	HSF
Prupe.7G117200.2.p	Prupe_7G117200	HSF
Prupe.7G117200.3.p	Prupe_7G117200	HSF
Prupe.7G117200.4.p	Prupe_7G117200	HSF
Prupe.7G117200.5.p	Prupe_7G117200	HSF
Prupe.7G117200.6.p	Prupe_7G117200	HSF
Prupe.7G133600.1.p	Prupe_7G133600	HSF
Prupe.7G206900.1.p	Prupe_7G206900	HSF
Prupe.7G231100.1.p	Prupe_7G231100	HSF
Prupe.8G234900.1.p	Prupe_8G234900	HSF
Prupe.8G234900.2.p	Prupe_8G234900	HSF
Prupe.8G234900.3.p	Prupe_8G234900	HSF
Prupe.8G234900.4.p	Prupe_8G234900	HSF
Prupe.8G234900.5.p	Prupe_8G234900	HSF
Prupe.8G234900.6.p	Prupe_8G234900	HSF
Prupe.8G234900.7.p	Prupe_8G234900	HSF
Prupe.8G234900.8.p	Prupe_8G234900	HSF
Prupe.1G033400.1.p	Prupe_1G033400	LBD
Prupe.1G311000.1.p	Prupe_1G311000	LBD
Prupe.1G411200.1.p	Prupe_1G411200	LBD
Prupe.1G424400.1.p	Prupe_1G424400	LBD
Prupe.2G014200.1.p	Prupe_2G014200	LBD
Prupe.2G146500.1.p	Prupe_2G146500	LBD
Prupe.2G146600.1.p	Prupe_2G146600	LBD
Prupe.2G191100.1.p	Prupe_2G191100	LBD
Prupe.2G218000.1.p	Prupe_2G218000	LBD
Prupe.2G238900.1.p	Prupe_2G238900	LBD
Prupe.2G253300.1.p	Prupe_2G253300	LBD
Prupe.2G256200.1.p	Prupe_2G256200	LBD
Prupe.2G261000.1.p	Prupe_2G261000	LBD
Prupe.2G290000.1.p	Prupe_2G290000	LBD
Prupe.3G018800.1.p	Prupe_3G018800	LBD
Prupe.3G049100.1.p	Prupe_3G049100	LBD
Prupe.3G071200.1.p	Prupe_3G071200	LBD
Prupe.3G126300.1.p	Prupe_3G126300	LBD
Prupe.3G126300.2.p	Prupe_3G126300	LBD
Prupe.3G236200.1.p	Prupe_3G236200	LBD
Prupe.3G273200.1.p	Prupe_3G273200	LBD
Prupe.3G290800.1.p	Prupe_3G290800	LBD
Prupe.4G055400.1.p	Prupe_4G055400	LBD
Prupe.4G086800.1.p	Prupe_4G086800	LBD
Prupe.4G105700.1.p	Prupe_4G105700	LBD
Prupe.4G138200.1.p	Prupe_4G138200	LBD
Prupe.4G271500.1.p	Prupe_4G271500	LBD
Prupe.5G167800.1.p	Prupe_5G167800	LBD
Prupe.5G167800.2.p	Prupe_5G167800	LBD
Prupe.5G184500.1.p	Prupe_5G184500	LBD
Prupe.6G043900.1.p	Prupe_6G043900	LBD
Prupe.6G043900.2.p	Prupe_6G043900	LBD
Prupe.6G050400.1.p	Prupe_6G050400	LBD
Prupe.6G093900.1.p	Prupe_6G093900	LBD
Prupe.6G223100.1.p	Prupe_6G223100	LBD
Prupe.6G365600.1.p	Prupe_6G365600	LBD
Prupe.6G365600.2.p	Prupe_6G365600	LBD
Prupe.6G365600.3.p	Prupe_6G365600	LBD
Prupe.6G365600.4.p	Prupe_6G365600	LBD
Prupe.6G365600.5.p	Prupe_6G365600	LBD
Prupe.7G011300.1.p	Prupe_7G011300	LBD
Prupe.7G137900.1.p	Prupe_7G137900	LBD
Prupe.7G137900.2.p	Prupe_7G137900	LBD
Prupe.7G145700.1.p	Prupe_7G145700	LBD
Prupe.7G208700.1.p	Prupe_7G208700	LBD
Prupe.7G209000.1.p	Prupe_7G209000	LBD
Prupe.8G142100.1.p	Prupe_8G142100	LBD
Prupe.8G227300.1.p	Prupe_8G227300	LBD
Prupe.8G227400.1.p	Prupe_8G227400	LBD
Prupe.8G227500.1.p	Prupe_8G227500	LBD
Prupe.8G227500.2.p	Prupe_8G227500	LBD
Prupe.5G140700.1.p	Prupe_5G140700	LFY
Prupe.4G046600.1.p	Prupe_4G046600	LSD
Prupe.4G102000.1.p	Prupe_4G102000	LSD
Prupe.5G039600.1.p	Prupe_5G039600	LSD
Prupe.5G039600.2.p	Prupe_5G039600	LSD
Prupe.5G039600.3.p	Prupe_5G039600	LSD
Prupe.5G039600.4.p	Prupe_5G039600	LSD
Prupe.5G039600.5.p	Prupe_5G039600	LSD
Prupe.1G223600.1.p	Prupe_1G223600	MIKC_MADS
Prupe.1G290500.1.p	Prupe_1G290500	MIKC_MADS
Prupe.1G290600.1.p	Prupe_1G290600	MIKC_MADS
Prupe.1G371300.1.p	Prupe_1G371300	MIKC_MADS
Prupe.1G371300.2.p	Prupe_1G371300	MIKC_MADS
Prupe.1G371300.3.p	Prupe_1G371300	MIKC_MADS
Prupe.1G371300.4.p	Prupe_1G371300	MIKC_MADS
Prupe.1G371300.5.p	Prupe_1G371300	MIKC_MADS
Prupe.1G371300.6.p	Prupe_1G371300	MIKC_MADS
Prupe.1G371300.7.p	Prupe_1G371300	MIKC_MADS
Prupe.1G489400.1.p	Prupe_1G489400	MIKC_MADS
Prupe.1G511300.1.p	Prupe_1G511300	MIKC_MADS
Prupe.1G531100.1.p	Prupe_1G531100	MIKC_MADS
Prupe.1G531100.2.p	Prupe_1G531100	MIKC_MADS
Prupe.1G531400.1.p	Prupe_1G531400	MIKC_MADS
Prupe.1G531600.1.p	Prupe_1G531600	MIKC_MADS
Prupe.1G531700.1.p	Prupe_1G531700	MIKC_MADS
Prupe.1G548000.1.p	Prupe_1G548000	MIKC_MADS
Prupe.1G548000.2.p	Prupe_1G548000	MIKC_MADS
Prupe.1G549600.1.p	Prupe_1G549600	MIKC_MADS
Prupe.1G549600.2.p	Prupe_1G549600	MIKC_MADS
Prupe.1G549600.3.p	Prupe_1G549600	MIKC_MADS
Prupe.2G023100.1.p	Prupe_2G023100	MIKC_MADS
Prupe.2G023100.2.p	Prupe_2G023100	MIKC_MADS
Prupe.2G151000.1.p	Prupe_2G151000	MIKC_MADS
Prupe.2G151200.1.p	Prupe_2G151200	MIKC_MADS
Prupe.2G151200.2.p	Prupe_2G151200	MIKC_MADS
Prupe.2G287000.1.p	Prupe_2G287000	MIKC_MADS
Prupe.2G287500.1.p	Prupe_2G287500	MIKC_MADS
Prupe.3G170600.1.p	Prupe_3G170600	MIKC_MADS
Prupe.3G249300.1.p	Prupe_3G249300	MIKC_MADS
Prupe.3G249300.2.p	Prupe_3G249300	MIKC_MADS
Prupe.3G249400.1.p	Prupe_3G249400	MIKC_MADS
Prupe.3G249400.2.p	Prupe_3G249400	MIKC_MADS
Prupe.3G249400.3.p	Prupe_3G249400	MIKC_MADS
Prupe.3G249400.4.p	Prupe_3G249400	MIKC_MADS
Prupe.3G307800.1.p	Prupe_3G307800	MIKC_MADS
Prupe.3G307800.2.p	Prupe_3G307800	MIKC_MADS
Prupe.3G307800.3.p	Prupe_3G307800	MIKC_MADS
Prupe.4G070500.1.p	Prupe_4G070500	MIKC_MADS
Prupe.4G070500.2.p	Prupe_4G070500	MIKC_MADS
Prupe.4G070500.3.p	Prupe_4G070500	MIKC_MADS
Prupe.4G070500.4.p	Prupe_4G070500	MIKC_MADS
Prupe.4G113500.1.p	Prupe_4G113500	MIKC_MADS
Prupe.5G087500.1.p	Prupe_5G087500	MIKC_MADS
Prupe.5G087500.2.p	Prupe_5G087500	MIKC_MADS
Prupe.5G149400.1.p	Prupe_5G149400	MIKC_MADS
Prupe.5G208400.1.p	Prupe_5G208400	MIKC_MADS
Prupe.5G208400.2.p	Prupe_5G208400	MIKC_MADS
Prupe.5G208400.3.p	Prupe_5G208400	MIKC_MADS
Prupe.5G208500.1.p	Prupe_5G208500	MIKC_MADS
Prupe.6G199000.1.p	Prupe_6G199000	MIKC_MADS
Prupe.6G199000.2.p	Prupe_6G199000	MIKC_MADS
Prupe.6G199000.3.p	Prupe_6G199000	MIKC_MADS
Prupe.6G199000.4.p	Prupe_6G199000	MIKC_MADS
Prupe.6G199000.5.p	Prupe_6G199000	MIKC_MADS
Prupe.6G208900.1.p	Prupe_6G208900	MIKC_MADS
Prupe.7G055900.1.p	Prupe_7G055900	MIKC_MADS
Prupe.7G164100.1.p	Prupe_7G164100	MIKC_MADS
Prupe.7G164100.2.p	Prupe_7G164100	MIKC_MADS
Prupe.8G069300.1.p	Prupe_8G069300	MIKC_MADS
Prupe.8G069300.2.p	Prupe_8G069300	MIKC_MADS
Prupe.8G069300.3.p	Prupe_8G069300	MIKC_MADS
Prupe.8G069300.4.p	Prupe_8G069300	MIKC_MADS
Prupe.8G069300.5.p	Prupe_8G069300	MIKC_MADS
Prupe.8G069300.6.p	Prupe_8G069300	MIKC_MADS
Prupe.8G069300.7.p	Prupe_8G069300	MIKC_MADS
Prupe.8G073700.1.p	Prupe_8G073700	MIKC_MADS
Prupe.8G073700.2.p	Prupe_8G073700	MIKC_MADS
Prupe.8G073700.3.p	Prupe_8G073700	MIKC_MADS
Prupe.1G032200.1.p	Prupe_1G032200	M-type_MADS
Prupe.1G048600.1.p	Prupe_1G048600	M-type_MADS
Prupe.1G087700.1.p	Prupe_1G087700	M-type_MADS
Prupe.1G168600.1.p	Prupe_1G168600	M-type_MADS
Prupe.1G168700.1.p	Prupe_1G168700	M-type_MADS
Prupe.1G168900.1.p	Prupe_1G168900	M-type_MADS
Prupe.1G276600.1.p	Prupe_1G276600	M-type_MADS
Prupe.1G276600.2.p	Prupe_1G276600	M-type_MADS
Prupe.1G276600.5.p	Prupe_1G276600	M-type_MADS
Prupe.1G276600.6.p	Prupe_1G276600	M-type_MADS
Prupe.1G427500.1.p	Prupe_1G427500	M-type_MADS
Prupe.1G427600.1.p	Prupe_1G427600	M-type_MADS
Prupe.1G531300.1.p	Prupe_1G531300	M-type_MADS
Prupe.1G531500.1.p	Prupe_1G531500	M-type_MADS
Prupe.1G533700.1.p	Prupe_1G533700	M-type_MADS
Prupe.1G538700.1.p	Prupe_1G538700	M-type_MADS
Prupe.1G538700.2.p	Prupe_1G538700	M-type_MADS
Prupe.1G554100.1.p	Prupe_1G554100	M-type_MADS
Prupe.2G047900.1.p	Prupe_2G047900	M-type_MADS
Prupe.2G109500.1.p	Prupe_2G109500	M-type_MADS
Prupe.2G110900.1.p	Prupe_2G110900	M-type_MADS
Prupe.2G120200.1.p	Prupe_2G120200	M-type_MADS
Prupe.3G032000.1.p	Prupe_3G032000	M-type_MADS
Prupe.3G035200.1.p	Prupe_3G035200	M-type_MADS
Prupe.3G111300.1.p	Prupe_3G111300	M-type_MADS
Prupe.3G148900.1.p	Prupe_3G148900	M-type_MADS
Prupe.3G249300.3.p	Prupe_3G249300	M-type_MADS
Prupe.3G306000.1.p	Prupe_3G306000	M-type_MADS
Prupe.4G077700.1.p	Prupe_4G077700	M-type_MADS
Prupe.4G077800.1.p	Prupe_4G077800	M-type_MADS
Prupe.5G195000.1.p	Prupe_5G195000	M-type_MADS
Prupe.5G243900.1.p	Prupe_5G243900	M-type_MADS
Prupe.6G119300.1.p	Prupe_6G119300	M-type_MADS
Prupe.6G119400.1.p	Prupe_6G119400	M-type_MADS
Prupe.6G121300.1.p	Prupe_6G121300	M-type_MADS
Prupe.6G121600.1.p	Prupe_6G121600	M-type_MADS
Prupe.6G121700.1.p	Prupe_6G121700	M-type_MADS
Prupe.6G121700.2.p	Prupe_6G121700	M-type_MADS
Prupe.6G124000.1.p	Prupe_6G124000	M-type_MADS
Prupe.6G213000.1.p	Prupe_6G213000	M-type_MADS
Prupe.6G303900.1.p	Prupe_6G303900	M-type_MADS
Prupe.6G304100.1.p	Prupe_6G304100	M-type_MADS
Prupe.7G030200.1.p	Prupe_7G030200	M-type_MADS
Prupe.7G030800.1.p	Prupe_7G030800	M-type_MADS
Prupe.7G030800.2.p	Prupe_7G030800	M-type_MADS
Prupe.7G030800.3.p	Prupe_7G030800	M-type_MADS
Prupe.7G031800.1.p	Prupe_7G031800	M-type_MADS
Prupe.7G031800.2.p	Prupe_7G031800	M-type_MADS
Prupe.7G032000.1.p	Prupe_7G032000	M-type_MADS
Prupe.7G091400.1.p	Prupe_7G091400	M-type_MADS
Prupe.7G092700.1.p	Prupe_7G092700	M-type_MADS
Prupe.7G092800.1.p	Prupe_7G092800	M-type_MADS
Prupe.7G092900.1.p	Prupe_7G092900	M-type_MADS
Prupe.8G151900.1.p	Prupe_8G151900	M-type_MADS
Prupe.8G152000.1.p	Prupe_8G152000	M-type_MADS
Prupe.8G158400.1.p	Prupe_8G158400	M-type_MADS
Prupe.8G158500.1.p	Prupe_8G158500	M-type_MADS
Prupe.1G039200.1.p	Prupe_1G039200	MYB
Prupe.1G051100.1.p	Prupe_1G051100	MYB
Prupe.1G051300.1.p	Prupe_1G051300	MYB
Prupe.1G089700.1.p	Prupe_1G089700	MYB
Prupe.1G111700.1.p	Prupe_1G111700	MYB
Prupe.1G125300.1.p	Prupe_1G125300	MYB
Prupe.1G253400.1.p	Prupe_1G253400	MYB
Prupe.1G271100.10.p	Prupe_1G271100	MYB
Prupe.1G271100.11.p	Prupe_1G271100	MYB
Prupe.1G271100.12.p	Prupe_1G271100	MYB
Prupe.1G271100.13.p	Prupe_1G271100	MYB
Prupe.1G271100.14.p	Prupe_1G271100	MYB
Prupe.1G271100.15.p	Prupe_1G271100	MYB
Prupe.1G271100.16.p	Prupe_1G271100	MYB
Prupe.1G271100.1.p	Prupe_1G271100	MYB
Prupe.1G271100.2.p	Prupe_1G271100	MYB
Prupe.1G271100.3.p	Prupe_1G271100	MYB
Prupe.1G271100.4.p	Prupe_1G271100	MYB
Prupe.1G271100.5.p	Prupe_1G271100	MYB
Prupe.1G271100.6.p	Prupe_1G271100	MYB
Prupe.1G271100.7.p	Prupe_1G271100	MYB
Prupe.1G271100.8.p	Prupe_1G271100	MYB
Prupe.1G271100.9.p	Prupe_1G271100	MYB
Prupe.1G276300.1.p	Prupe_1G276300	MYB
Prupe.1G278200.1.p	Prupe_1G278200	MYB
Prupe.1G313300.1.p	Prupe_1G313300	MYB
Prupe.1G323400.1.p	Prupe_1G323400	MYB
Prupe.1G349700.1.p	Prupe_1G349700	MYB
Prupe.1G404700.1.p	Prupe_1G404700	MYB
Prupe.1G405100.1.p	Prupe_1G405100	MYB
Prupe.1G405200.1.p	Prupe_1G405200	MYB
Prupe.1G405300.1.p	Prupe_1G405300	MYB
Prupe.1G405400.1.p	Prupe_1G405400	MYB
Prupe.1G416400.1.p	Prupe_1G416400	MYB
Prupe.1G416400.2.p	Prupe_1G416400	MYB
Prupe.1G417400.1.p	Prupe_1G417400	MYB
Prupe.1G430000.1.p	Prupe_1G430000	MYB
Prupe.1G441700.1.p	Prupe_1G441700	MYB
Prupe.1G452000.1.p	Prupe_1G452000	MYB
Prupe.1G452000.2.p	Prupe_1G452000	MYB
Prupe.1G452000.3.p	Prupe_1G452000	MYB
Prupe.1G517400.1.p	Prupe_1G517400	MYB
Prupe.1G551400.1.p	Prupe_1G551400	MYB
Prupe.2G012800.1.p	Prupe_2G012800	MYB
Prupe.2G050100.1.p	Prupe_2G050100	MYB
Prupe.2G050100.2.p	Prupe_2G050100	MYB
Prupe.2G070600.1.p	Prupe_2G070600	MYB
Prupe.2G124100.1.p	Prupe_2G124100	MYB
Prupe.2G158300.1.p	Prupe_2G158300	MYB
Prupe.2G164300.1.p	Prupe_2G164300	MYB
Prupe.2G192100.1.p	Prupe_2G192100	MYB
Prupe.2G215600.1.p	Prupe_2G215600	MYB
Prupe.2G215600.2.p	Prupe_2G215600	MYB
Prupe.2G244100.1.p	Prupe_2G244100	MYB
Prupe.2G245900.1.p	Prupe_2G245900	MYB
Prupe.2G245900.2.p	Prupe_2G245900	MYB
Prupe.2G252700.1.p	Prupe_2G252700	MYB
Prupe.2G273900.1.p	Prupe_2G273900	MYB
Prupe.2G280100.1.p	Prupe_2G280100	MYB
Prupe.2G293700.1.p	Prupe_2G293700	MYB
Prupe.2G327700.1.p	Prupe_2G327700	MYB
Prupe.3G006300.1.p	Prupe_3G006300	MYB
Prupe.3G017100.1.p	Prupe_3G017100	MYB
Prupe.3G042100.1.p	Prupe_3G042100	MYB
Prupe.3G042300.1.p	Prupe_3G042300	MYB
Prupe.3G046900.1.p	Prupe_3G046900	MYB
Prupe.3G085700.1.p	Prupe_3G085700	MYB
Prupe.3G085900.1.p	Prupe_3G085900	MYB
Prupe.3G158700.1.p	Prupe_3G158700	MYB
Prupe.3G163000.1.p	Prupe_3G163000	MYB
Prupe.3G163100.1.p	Prupe_3G163100	MYB
Prupe.3G163300.1.p	Prupe_3G163300	MYB
Prupe.3G216600.1.p	Prupe_3G216600	MYB
Prupe.3G227800.1.p	Prupe_3G227800	MYB
Prupe.3G227900.1.p	Prupe_3G227900	MYB
Prupe.3G228500.1.p	Prupe_3G228500	MYB
Prupe.3G249600.1.p	Prupe_3G249600	MYB
Prupe.3G264500.1.p	Prupe_3G264500	MYB
Prupe.3G268000.1.p	Prupe_3G268000	MYB
Prupe.3G268000.2.p	Prupe_3G268000	MYB
Prupe.3G274800.1.p	Prupe_3G274800	MYB
Prupe.3G286800.1.p	Prupe_3G286800	MYB
Prupe.3G299000.1.p	Prupe_3G299000	MYB
Prupe.3G299000.2.p	Prupe_3G299000	MYB
Prupe.3G299000.3.p	Prupe_3G299000	MYB
Prupe.4G034000.1.p	Prupe_4G034000	MYB
Prupe.4G035100.1.p	Prupe_4G035100	MYB
Prupe.4G119700.1.p	Prupe_4G119700	MYB
Prupe.4G126900.1.p	Prupe_4G126900	MYB
Prupe.4G136300.1.p	Prupe_4G136300	MYB
Prupe.4G192000.1.p	Prupe_4G192000	MYB
Prupe.4G204800.1.p	Prupe_4G204800	MYB
Prupe.4G215500.1.p	Prupe_4G215500	MYB
Prupe.4G215500.2.p	Prupe_4G215500	MYB
Prupe.4G215600.1.p	Prupe_4G215600	MYB
Prupe.4G247800.1.p	Prupe_4G247800	MYB
Prupe.5G031700.1.p	Prupe_5G031700	MYB
Prupe.5G065500.1.p	Prupe_5G065500	MYB
Prupe.5G077500.1.p	Prupe_5G077500	MYB
Prupe.5G093400.1.p	Prupe_5G093400	MYB
Prupe.5G093400.2.p	Prupe_5G093400	MYB
Prupe.5G105700.1.p	Prupe_5G105700	MYB
Prupe.5G105800.1.p	Prupe_5G105800	MYB
Prupe.5G126600.1.p	Prupe_5G126600	MYB
Prupe.5G167100.1.p	Prupe_5G167100	MYB
Prupe.5G167100.2.p	Prupe_5G167100	MYB
Prupe.5G167100.3.p	Prupe_5G167100	MYB
Prupe.5G172400.1.p	Prupe_5G172400	MYB
Prupe.5G174200.1.p	Prupe_5G174200	MYB
Prupe.5G183500.1.p	Prupe_5G183500	MYB
Prupe.5G183500.2.p	Prupe_5G183500	MYB
Prupe.5G183500.3.p	Prupe_5G183500	MYB
Prupe.5G183500.4.p	Prupe_5G183500	MYB
Prupe.5G193200.1.p	Prupe_5G193200	MYB
Prupe.5G196100.1.p	Prupe_5G196100	MYB
Prupe.5G196100.2.p	Prupe_5G196100	MYB
Prupe.5G217700.1.p	Prupe_5G217700	MYB
Prupe.5G222400.1.p	Prupe_5G222400	MYB
Prupe.5G230100.1.p	Prupe_5G230100	MYB
Prupe.5G230100.2.p	Prupe_5G230100	MYB
Prupe.5G230700.1.p	Prupe_5G230700	MYB
Prupe.5G230800.1.p	Prupe_5G230800	MYB
Prupe.5G240000.1.p	Prupe_5G240000	MYB
Prupe.6G004700.1.p	Prupe_6G004700	MYB
Prupe.6G032800.1.p	Prupe_6G032800	MYB
Prupe.6G059700.1.p	Prupe_6G059700	MYB
Prupe.6G085000.1.p	Prupe_6G085000	MYB
Prupe.6G109200.1.p	Prupe_6G109200	MYB
Prupe.6G175900.1.p	Prupe_6G175900	MYB
Prupe.6G176200.1.p	Prupe_6G176200	MYB
Prupe.6G176300.1.p	Prupe_6G176300	MYB
Prupe.6G188300.1.p	Prupe_6G188300	MYB
Prupe.6G214300.1.p	Prupe_6G214300	MYB
Prupe.6G229000.1.p	Prupe_6G229000	MYB
Prupe.6G255400.1.p	Prupe_6G255400	MYB
Prupe.6G255400.2.p	Prupe_6G255400	MYB
Prupe.6G255800.1.p	Prupe_6G255800	MYB
Prupe.6G255800.2.p	Prupe_6G255800	MYB
[truncated: 782 more rows]
