# Supplementary material for: Screening of MYB1R1 interaction with LDOX promoter to regulate anthocyanin biosynthesis in peaches
Source: PeerJ. 2025 Sep 4;13:e19975. doi: 10.7717/peerj.19975 (PMC12422263; doi:10.7717/peerj.19975)
Supplement: Supplemental Information 5 [file peerj-13-19975-s005.xlsx]

## Sheet: Sheet1
pattern name	Family	start	stop	strand	score	p-value	q-value	matched sequence
Prupe_6G091100	AP2	834	843	-	9.54286	0.000119	0.32	ACCTCGTGCG
Prupe_6G091100	AP2	1373	1382	-	9.14286	0.000153	0.32	ATCTCGTATT
Prupe_1G418600	AP2	259	279	-	1.86207	0.000222	0.912	AGTCTCACGTCCTAATATGCT
Prupe_6G091100	AP2	163	172	-	7.30476	0.000373	0.351	TCCTCGTCTG
Prupe_6G091100	AP2	62	71	+	7.2	0.000386	0.351	CCTTCGTACC
Prupe_6G091100	AP2	1103	1112	-	7.01905	0.000419	0.351	ACATCGCACC
Prupe_6G203000	AP2	895	909	-	7.15625	0.000483	1	TCTTGGATTTGGGGT
Prupe_6G236200	ARF	1795	1815	-	14.8875	2.23e-07	0.000919	TTTATGTTTTTGGTCTAAAAA
Prupe_6G236200	ARF	1292	1312	-	-6.7625	0.000192	0.278	GTTGTGGTTTTTGAGAAAAGC
Prupe_6G236200	ARF	1427	1447	+	-6.9875	0.000202	0.278	TACACGCTTATGACAAGAGTT
Prupe_3G011800	ARF	709	717	-	9.01042	0.000273	0.997	ATTGTCGTC
Prupe_1G368300	ARF	1551	1560	-	9.0625	0.000273	0.817	AACGACAAGT
Prupe_4G053800	ARF	707	716	-	6.91429	0.00035	1	TTGTCGTCAA
Prupe_1G585200	ARF	380	387	+	5.42529	0.000369	0.618	ACCCACAG
Prupe_6G236200	ARF	948	968	-	-10.1875	0.000424	0.379	CTTTTGGGTTAGCTGGAAAAG
Prupe_1G585200	ARF	2028	2035	+	5.33333	0.000431	0.618	ACCAACAT
Prupe_5G143100	ARF	1042	1051	-	8.98438	0.000445	0.587	CGGAGACACA
Prupe_1G585200	ARF	1169	1176	+	5.26437	0.000445	0.618	AACGACAC
Prupe_3G011800	ARF	1552	1560	+	8.17708	0.000525	0.997	CTTGTCGTT
Prupe_1G368300	ARF	709	718	+	7.54688	0.000547	0.817	GACGACAATG
Prupe_5G143100	ARF	1731	1740	+	8.60938	0.000554	0.587	ATGCAACAAA
Prupe_6G236200	ARF	1186	1206	+	-11.5	0.000566	0.379	GTGGTGGTTTTGATGGGCATG
Prupe_5G143100	ARF	716	725	+	8.45312	0.000606	0.587	ATGAGACAAT
Prupe_1G368300	ARF	739	748	+	7.21875	0.000634	0.817	AAAGACAAAA
Prupe_6G236200	ARF	1790	1810	+	-12.05	0.000637	0.379	ATTAGTTTTTAGACCAAAAAC
Prupe_1G585200	ARF	239	246	+	4.91954	0.000658	0.653	ACCGAGAA
Prupe_6G236200	ARF	1406	1426	+	-12.6875	0.000729	0.379	ATTGCTCTAGCGGCAAAAATA
Prupe_1G585200	ARF	1553	1560	-	4.66667	0.000783	0.653	AACGACAA
Prupe_1G368300	ARF	1169	1178	+	6.64062	0.000793	0.817	AACGACACAA
Prupe_6G236200	ARF	1552	1572	+	-13.1875	0.00081	0.379	CTTGTCGTTTAAATGGATAAA
Prupe_5G143100	ARF	1413	1422	+	7.875	0.000814	0.587	TAGCGGCAAA
Prupe_6G236200	ARF	1462	1482	+	-13.2875	0.000827	0.379	TTTTTATTGAATGCGAAGAAT
Prupe_4G053800	ARF	183	192	-	5.13333	0.000841	1	TGGACGGAAC
Prupe_5G143100	ARF	422	431	-	7.78125	0.000854	0.587	ATCAAACAAA
Prupe_5G143100	ARF	2027	2036	+	7.76562	0.000863	0.587	AACCAACATC
Prupe_3G011800	ARF	1627	1635	-	7.54167	0.000864	0.997	TCTGTAGGG
Prupe_3G011800	ARF	437	445	-	7.36458	0.000955	0.997	TTTGTAGGG
Prupe_1G238200	ARR-B	769	778	+	11.2762	7.37e-05	0.308	AAAGATTTGG
Prupe_1G238200	ARR-B	878	887	-	7.08571	0.00051	0.877	GAAGACTCGG
Prupe_1G238200	ARR-B	350	359	-	6.12381	0.000804	0.877	TATGATTCGA
Prupe_1G238200	ARR-B	790	799	+	6.00952	0.000838	0.877	AAAGATATAG
Prupe_4G049500	B3	1953	1960	+	15.781	1.09e-05	0.0456	ATGCATGC
Prupe_3G312100	B3	1947	1961	+	13.375	2.08e-05	0.0863	AATCCCATGCATGCC
Prupe_8G207700	B3	1954	1962	-	11.9328	4.29e-05	0.179	GGGCATGCA
Prupe_3G312100	B3	1950	1964	-	12.0469	4.46e-05	0.0925	GTGGGCATGCATGGG
Prupe_8G207700	B3	1953	1961	+	10.597	9.53e-05	0.199	ATGCATGCC
Prupe_4G049500	B3	1951	1958	-	7.89524	0.000102	0.213	ATGCATGG
Prupe_3G312100	B3	1075	1089	-	7.98438	0.000151	0.209	AAATGCATACATGAC
Prupe_8G207700	B3	1949	1957	+	9.0597	0.000215	0.226	TCCCATGCA
Prupe_8G207700	B3	1201	1209	-	9.05224	0.000217	0.226	TTCCATGCC
Prupe_8G207700	B3	1200	1208	+	8.53731	0.0003	0.25	GGGCATGGA
Prupe_4G049500	B3	1078	1085	+	7.00952	0.000388	0.397	ATGTATGC
Prupe_4G049500	B3	1080	1087	-	7.00952	0.000388	0.397	ATGCATAC
Prupe_3G312100	B3	1980	1994	-	2.21875	0.000449	0.466	CTTCTCATACAAGGA
Prupe_4G049500	B3	1955	1962	-	1.94286	0.000474	0.397	GGGCATGC
Prupe_3G312100	B3	1076	1090	+	0.5625	0.000665	0.552	TCATGTATGCATTTA
Prupe_4G049500	B3	449	456	-	0.771429	0.000682	0.476	TTGCAAGC
Prupe_8G207700	B3	1950	1958	-	6.99254	0.00069	0.48	ATGCATGGG
Prupe_3G312100	B3	1951	1965	+	-0.21875	0.000808	0.559	CCATGCATGCCCACC
Prupe_4G049500	B3	1202	1209	-	0.495238	0.000817	0.488	TTCCATGC
Prupe_3G312100	B3	1079	1093	-	-0.90625	0.000968	0.574	TGCTAAATGCATACA
Prupe_1G338500	BBR-BPC	136	159	+	4.9375	1.01e-05	0.0229	AAGAAAAAAAAAAAGAGTAAAATA
Prupe_1G338500	BBR-BPC	134	157	+	4.0625	1.37e-05	0.0229	GAAAGAAAAAAAAAAAGAGTAAAA
Prupe_1G338500	BBR-BPC	132	155	+	3.35938	1.74e-05	0.0229	TGGAAAGAAAAAAAAAAAGAGTAA
Prupe_1G338500	BBR-BPC	130	153	+	2.34375	2.45e-05	0.0241	TATGGAAAGAAAAAAAAAAAGAGT
Prupe_1G369400	BBR-BPC	130	150	-	0.581081	3.29e-05	0.0535	CTTTTTTTTTTTCTTTCCATA
Prupe_1G369400	BBR-BPC	2076	2096	+	0.310811	3.56e-05	0.0535	CACGCACACACACTCTCTCTA
Prupe_1G369400	BBR-BPC	2060	2080	+	-0.135135	4.05e-05	0.0535	TCTCCACTCTCTCTAACACGC
Prupe_1G338500	BBR-BPC	128	151	+	0.4375	4.54e-05	0.0357	ATTATGGAAAGAAAAAAAAAAAGA
Prupe_1G369400	BBR-BPC	134	154	-	-2.36486	7.59e-05	0.0734	TACTCTTTTTTTTTTTCTTTC
Prupe_1G369400	BBR-BPC	2058	2078	+	-3.40541	0.000101	0.0734	ATTCTCCACTCTCTCTAACAC
Prupe_1G369400	BBR-BPC	132	152	-	-3.77027	0.000111	0.0734	CTCTTTTTTTTTTTCTTTCCA
Prupe_1G369400	BBR-BPC	2054	2074	+	-6.18919	0.000208	0.109	ACACATTCTCCACTCTCTCTA
Prupe_1G369400	BBR-BPC	2080	2100	+	-6.41892	0.00022	0.109	CACACACACTCTCTCTAGTTG
Prupe_1G338500	BBR-BPC	797	820	+	-5.375	0.000254	0.135	TAGGCAGGTAGACTGACTGAAAGT
Prupe_1G338500	BBR-BPC	2055	2078	-	-5.59375	0.000269	0.135	GTGTTAGAGAGAGTGGAGAATGTG
Prupe_1G338500	BBR-BPC	789	812	+	-5.70312	0.000277	0.135	CAAAGATATAGGCAGGTAGACTGA
Prupe_1G338500	BBR-BPC	783	806	+	-6.09375	0.000309	0.135	AAGTAACAAAGATATAGGCAGGTA
Prupe_1G338500	BBR-BPC	2071	2094	-	-6.70312	0.000364	0.143	GAGAGAGTGTGTGTGCGTGTTAGA
Prupe_1G369400	BBR-BPC	797	817	-	-9	0.000413	0.171	TTCAGTCAGTCTACCTGCCTA
Prupe_1G369400	BBR-BPC	1999	2019	-	-9.18919	0.000432	0.171	CCATGTGACCTTCTCACCCAC
Prupe_1G338500	BBR-BPC	2063	2086	-	-8.07812	0.000521	0.162	GTGTGTGCGTGTTAGAGAGAGTGG
Prupe_1G338500	BBR-BPC	2065	2088	-	-8.07812	0.000521	0.162	GTGTGTGTGCGTGTTAGAGAGAGT
Prupe_1G338500	BBR-BPC	785	808	+	-8.17188	0.000534	0.162	GTAACAAAGATATAGGCAGGTAGA
Prupe_1G369400	BBR-BPC	2056	2076	+	-10.3919	0.000571	0.19	ACATTCTCCACTCTCTCTAAC
Prupe_1G369400	BBR-BPC	17	37	+	-10.4324	0.000576	0.19	TTATTCTTATCTCCATCCCTG
Prupe_1G338500	BBR-BPC	779	802	+	-8.625	0.0006	0.169	ACGAAAGTAACAAAGATATAGGCA
Prupe_1G369400	BBR-BPC	136	156	-	-11.3108	0.000703	0.207	TTTACTCTTTTTTTTTTTCTT
Prupe_1G338500	BBR-BPC	14	37	-	-9.48438	0.000745	0.195	CAGGGATGGAGATAAGAATAATAT
Prupe_1G369400	BBR-BPC	138	158	-	-11.6081	0.000751	0.207	ATTTTACTCTTTTTTTTTTTC
Prupe_1G338500	BBR-BPC	2075	2098	-	-9.79688	0.000805	0.198	ACTAGAGAGAGTGTGTGTGCGTGT
Prupe_1G369400	BBR-BPC	2074	2094	+	-12.0541	0.000829	0.207	AACACGCACACACACTCTCTC
Prupe_1G369400	BBR-BPC	2062	2082	+	-12.2838	0.000872	0.207	TCCACTCTCTCTAACACGCAC
Prupe_1G338500	BBR-BPC	2053	2076	-	-10.2656	0.000903	0.209	GTTAGAGAGAGTGGAGAATGTGTT
Prupe_1G369400	BBR-BPC	789	809	-	-12.7703	0.00097	0.207	GTCTACCTGCCTATATCTTTG
Prupe_1G369400	BBR-BPC	126	146	-	-12.8378	0.000984	0.207	TTTTTTTTCTTTCCATAATGA
Prupe_1G369400	BBR-BPC	785	805	-	-12.8784	0.000993	0.207	ACCTGCCTATATCTTTGTTAC
Prupe_4G158400	BES1	834	844	+	6.09375	4.61e-05	0.191	CGCACGAGGTA
Prupe_1G382900	BES1	2	21	+	8.375	5.64e-05	0.232	CCGCTCGTGAGTATATTATT
Prupe_5G013400	BES1	829	843	+	5.90625	0.000119	0.492	TGACACGCACGAGGT
Prupe_1G382900	BES1	833	852	+	4.59375	0.000153	0.257	ACGCACGAGGTACCAAATCA
Prupe_1G382900	BES1	821	840	-	2.60938	0.000249	0.257	TCGTGCGTGTCAACTACGCA
Prupe_1G382900	BES1	391	410	+	2.34375	0.000266	0.257	TCGCCCGAGTGACCTATCAA
Prupe_4G158400	BES1	3	13	+	-0.5	0.000271	0.464	CGCTCGTGAGT
Prupe_5G013400	BES1	826	840	-	2.46875	0.0003	0.622	TCGTGCGTGTCAACT
Prupe_1G382900	BES1	825	844	-	1.65625	0.000312	0.257	TACCTCGTGCGTGTCAACTA
Prupe_4G158400	BES1	392	402	+	-2.76562	0.000476	0.464	CGCCCGAGTGA
Prupe_4G158400	BES1	2	12	-	-3.01562	0.000491	0.464	CTCACGAGCGG
Prupe_5G013400	BES1	2073	2087	+	0.1875	0.00053	0.651	TAACACGCACACACA
Prupe_4G158400	BES1	1579	1589	+	-3.71875	0.000558	0.464	TACACCTGAGA
Prupe_5G013400	BES1	2	16	+	-0.515625	0.000628	0.651	CCGCTCGTGAGTATA
Prupe_1G382900	BES1	383	402	-	-1.90625	0.000679	0.436	TCACTCGGGCGAAATCTGTG
Prupe_1G382900	BES1	2065	2084	-	-2.32812	0.000742	0.436	GTGTGCGTGTTAGAGAGAGT
Prupe_6G303500	bHLH	2012	2021	-	13.0156	2.65e-05	0.111	GTCCATGTGA
Prupe_3G179800	bHLH	2012	2020	+	11.8841	6.06e-05	0.253	TCACATGGA
Prupe_1G554600	bHLH	681	691	+	10.6562	6.34e-05	0.215	AACAAGTTGTT
Prupe_7G071500	bHLH	681	691	-	11.0676	7.38e-05	0.305	AACAACTTGTT
Prupe_1G294200	bHLH	2004	2018	-	8.71875	7.39e-05	0.307	CATGTGACCTTCTCA
Prupe_6G022200	bHLH	682	690	-	10.4	8.24e-05	0.34	ACAACTTGT
Prupe_2G190100	bHLH	1159	1166	+	9.82759	8.41e-05	0.352	AAACGTGC
Prupe_1G554600	bHLH	814	824	+	6.28125	0.000104	0.215	TGAAAGTTGCG
Prupe_7G260800	bHLH	834	843	+	10.2396	0.000113	0.155	CGCACGAGGT
Prupe_7G260800	bHLH	834	843	-	10.2396	0.000113	0.155	ACCTCGTGCG
Prupe_2G136300	bHLH	835	842	-	7.27368	0.00012	0.459	CCTCGTGC
Prupe_7G131400	bHLH	268	276	-	10.2421	0.000133	0.469	CTCACGTCC
Prupe_7G260800	bHLH	3	12	+	9.92708	0.000149	0.155	CGCTCGTGAG
Prupe_7G260800	bHLH	3	12	-	9.92708	0.000149	0.155	CTCACGAGCG
Prupe_1G418500	bHLH	260	280	+	6.7027	0.000152	0.348	GCATATTAGGACGTGAGACTA
Prupe_5G210500	bHLH	2005	2018	-	3.375	0.000163	0.632	CATGTGACCTTCTC
Prupe_1G418500	bHLH	827	847	+	6.2973	0.00017	0.348	GTTGACACGCACGAGGTACCA
Prupe_1G263800	bHLH	2005	2025	-	7.82812	0.00017	0.463	CGTTGTCCATGTGACCTTCTC
Prupe_1G173300	bHLH	835	842	-	7.4	0.000182	0.535	CCTCGTGC
Prupe_8G209100	bHLH	2006	2019	+	6.44595	0.0002	0.401	AGAAGGTCACATGG
Prupe_5G035400	bHLH	1159	1166	+	9.58025	0.000201	0.42	AAACGTGC
Prupe_5G035400	bHLH	1159	1166	-	9.58025	0.000201	0.42	GCACGTTT
Prupe_8G228700	bHLH	1159	1166	+	8.89076	0.000205	0.383	AAACGTGC
Prupe_8G228700	bHLH	1159	1166	-	8.89076	0.000205	0.383	GCACGTTT
Prupe_1G263800	bHLH	2006	2026	+	6.79688	0.000224	0.463	AGAAGGTCACATGGACAACGG
Prupe_8G209100	bHLH	1094	1107	+	5.71622	0.00023	0.401	CGAAAGAGAGGTGC
Prupe_2G136300	bHLH	4	11	-	5.22105	0.00026	0.459	TCACGAGC
Prupe_7G071500	bHLH	2092	2102	-	5.16216	0.000289	0.596	ACCAACTAGAG
Prupe_8G209100	bHLH	262	275	+	4.55405	0.000291	0.401	ATATTAGGACGTGA
Prupe_1G037400	bHLH	1158	1167	+	0.216667	0.00031	0.645	AAAACGTGCT
Prupe_1G037400	bHLH	1158	1167	-	0.216667	0.00031	0.645	AGCACGTTTT
Prupe_1G173300	bHLH	2012	2019	+	6.34737	0.000316	0.535	TCACATGG
Prupe_6G022200	bHLH	1685	1693	-	4.98947	0.000328	0.597	ACCACTTCC
Prupe_2G136300	bHLH	268	275	-	4.61053	0.000354	0.459	TCACGTCC
Prupe_2G190100	bHLH	1159	1166	-	6.52874	0.000362	0.565	GCACGTTT
Prupe_8G228700	bHLH	835	842	+	8.05882	0.000367	0.383	GCACGAGG
Prupe_8G228700	bHLH	835	842	-	8.05882	0.000367	0.383	CCTCGTGC
Prupe_4G030600	bHLH	864	877	-	0.971429	0.000373	1	CAGAAGTCTCCTGA
Prupe_1G418500	bHLH	2004	2024	+	3.13514	0.000378	0.466	TGAGAAGGTCACATGGACAAC
Prupe_2G190100	bHLH	835	842	-	6.37931	0.000405	0.565	CCTCGTGC
Prupe_1G173300	bHLH	4	11	-	5.56842	0.000407	0.535	TCACGAGC
Prupe_7G260800	bHLH	1158	1167	+	8.22917	0.000421	0.292	AAAACGTGCT
Prupe_7G260800	bHLH	1158	1167	-	8.22917	0.000421	0.292	AGCACGTTTT
Prupe_7G131400	bHLH	835	843	-	8.28421	0.000425	0.469	ACCTCGTGC
Prupe_1G554600	bHLH	1699	1709	-	0.265625	0.000431	0.481	TGGAAGTTGTA
Prupe_6G022200	bHLH	200	208	+	4.71579	0.000434	0.597	GCCACTTAA
Prupe_2G136300	bHLH	2012	2019	-	4.6	0.000442	0.459	CCATGTGA
Prupe_1G418500	bHLH	1154	1174	-	2.39189	0.000453	0.466	GTCGTTGAGCACGTTTTACCT
Prupe_6G303500	bHLH	833	842	+	0.15625	0.000463	0.957	ACGCACGAGG
Prupe_1G554600	bHLH	1684	1694	+	0.046875	0.000465	0.481	TGGAAGTGGTT
Prupe_1G294200	bHLH	2013	2027	+	0.796875	0.000484	0.554	CACATGGACAACGGA
Prupe_1G294200	bHLH	827	841	-	0.796875	0.000484	0.554	CTCGTGCGTGTCAAC
Prupe_7G131400	bHLH	2012	2020	-	8.03158	0.000488	0.469	TCCATGTGA
Prupe_4G030600	bHLH	1023	1036	+	-0.0761905	0.00051	1	CATCAAATACGTTA
Prupe_1G173300	bHLH	268	275	-	4.97895	0.000513	0.535	TCACGTCC
Prupe_7G131400	bHLH	3	11	+	7.75789	0.000541	0.469	CGCTCGTGA
Prupe_5G210500	bHLH	828	841	-	-1.03125	0.000544	0.632	CTCGTGCGTGTCAA
Prupe_2G190100	bHLH	835	842	+	5.26437	0.000568	0.595	GCACGAGG
Prupe_1G263800	bHLH	828	848	-	1.8125	0.000572	0.789	TTGGTACCTCGTGCGTGTCAA
Prupe_7G131400	bHLH	1159	1167	-	7.55789	0.000588	0.469	AGCACGTTT
Prupe_3G179800	bHLH	3	11	-	0.333333	0.000589	0.678	TCACGAGCG
Prupe_2G136300	bHLH	1159	1166	+	4.37895	0.000643	0.535	AAACGTGC
Prupe_5G210500	bHLH	1581	1594	+	-1.59375	0.000645	0.632	CACCTGAGATTGAT
Prupe_1G554600	bHLH	199	209	-	-1.1875	0.00067	0.555	TTTAAGTGGCA
Prupe_7G131400	bHLH	2011	2019	+	7.30526	0.000673	0.469	GTCACATGG
Prupe_3G179800	bHLH	835	843	+	-0.0434783	0.000685	0.678	GCACGAGGT
Prupe_7G071500	bHLH	1684	1694	-	1.63514	0.000715	0.753	AACCACTTCCA
Prupe_8G209100	bHLH	268	281	-	1.17568	0.000716	0.645	ATAGTCTCACGTCC
Prupe_1G037400	bHLH	2011	2020	+	-3.36667	0.000722	0.683	GTCACATGGA
Prupe_1G037400	bHLH	2011	2020	-	-3.36667	0.000722	0.683	TCCATGTGAC
Prupe_7G071500	bHLH	814	824	-	1.55405	0.000729	0.753	CGCAACTTTCA
Prupe_6G022200	bHLH	760	768	-	3.50526	0.000737	0.76	TCCACTTCA
Prupe_5G035400	bHLH	835	842	+	6.71605	0.000745	0.672	GCACGAGG
Prupe_5G035400	bHLH	835	842	-	6.71605	0.000745	0.672	CCTCGTGC
Prupe_5G210500	bHLH	1160	1173	+	-2.15625	0.000756	0.632	AACGTGCTCAACGA
Prupe_1G173300	bHLH	1159	1166	+	4.14737	0.000756	0.631	AAACGTGC
Prupe_5G210500	bHLH	1152	1165	-	-2.1875	0.000762	0.632	CACGTTTTACCTAC
Prupe_3G179800	bHLH	1831	1839	+	-0.362319	0.000779	0.678	GCACAAGGC
Prupe_8G209100	bHLH	829	842	+	0.905405	0.00078	0.645	TGACACGCACGAGG
Prupe_3G179800	bHLH	834	842	-	-0.57971	0.000813	0.678	CCTCGTGCG
Prupe_4G030600	bHLH	464	477	-	-1.73333	0.00082	1	AAGTCAACACAGGA
Prupe_1G294200	bHLH	1581	1595	+	-1.6875	0.00087	0.554	CACCTGAGATTGATC
Prupe_6G303500	bHLH	1178	1187	+	-1.78125	0.000873	0.957	AGCGATGTGT
Prupe_1G294200	bHLH	1151	1165	-	-1.85938	0.000905	0.554	CACGTTTTACCTACC
Prupe_1G263800	bHLH	1856	1876	+	-0.6875	0.000908	0.813	TTAGGCACATATGAAATTGAA
Prupe_8G228700	bHLH	4	11	+	6.11765	0.000909	0.633	GCTCGTGA
Prupe_8G228700	bHLH	4	11	-	6.11765	0.000909	0.633	TCACGAGC
Prupe_1G294200	bHLH	836	850	+	-1.90625	0.000915	0.554	CACGAGGTACCAAAT
Prupe_6G303500	bHLH	2	11	+	-1.9375	0.000918	0.957	CCGCTCGTGA
Prupe_1G294200	bHLH	1160	1174	+	-1.98438	0.000932	0.554	AACGTGCTCAACGAC
Prupe_6G022200	bHLH	815	823	-	3.16842	0.000937	0.773	GCAACTTTC
Prupe_7G071500	bHLH	1699	1709	+	0.635135	0.000937	0.774	TACAACTTCCA
Prupe_2G190100	bHLH	2012	2019	-	4.06897	0.00095	0.796	CCATGTGA
Prupe_5G035400	bHLH	2054	2061	+	6.23457	0.000964	0.672	ACACATTC
Prupe_5G035400	bHLH	2054	2061	-	6.23457	0.000964	0.672	GAATGTGT
Prupe_5G210500	bHLH	269	282	+	-3.14062	0.000966	0.667	GACGTGAGACTATT
Prupe_1G173300	bHLH	2012	2019	-	3.56842	0.000971	0.675	CCATGTGA
Prupe_1G263800	bHLH	1855	1875	-	-1.04688	0.000983	0.813	TCAATTTCATATGTGCCTAAC
Prupe_1G037400	bHLH	834	843	+	-4.83333	0.000985	0.683	CGCACGAGGT
Prupe_1G037400	bHLH	834	843	-	-4.83333	0.000985	0.683	ACCTCGTGCG
Prupe_8G026300	bZIP	1058	1069	-	11.9062	2.79e-05	0.109	TTGACAACTGTA
Prupe_1G197700	bZIP	1057	1067	-	8.87838	4.41e-05	0.116	GACAACTGTAA
Prupe_1G197700	bZIP	853	863	+	7.94595	5.58e-05	0.116	ACCAACTGTCT
Prupe_8G026300	bZIP	950	961	+	10.125	6.11e-05	0.109	TTTCCAGCTAAC
Prupe_1G478400	bZIP	584	598	-	8.71875	6.79e-05	0.283	GTCGATGATGTAGCA
Prupe_8G026300	bZIP	1056	1067	+	8.65625	0.000101	0.109	ATTACAGTTGTC
Prupe_8G026300	bZIP	853	864	-	8.5625	0.000105	0.109	AAGACAGTTGGT
Prupe_7G073000	bZIP	584	598	-	8.01562	0.000105	0.438	GTCGATGATGTAGCA
Prupe_1G197700	bZIP	1058	1068	+	5.22973	0.000122	0.169	TACAGTTGTCA
Prupe_2G263700	bZIP	853	863	+	9.59375	0.000124	0.254	ACCAACTGTCT
Prupe_5G027000	bZIP	1578	1592	-	3.76562	0.000125	0.406	CAATCTCAGGTGTAA
Prupe_6G129100	bZIP	585	595	-	6.03125	0.000143	0.465	GATGATGTAGC
Prupe_8G026300	bZIP	1896	1907	-	7.57812	0.000151	0.126	GTGCCAGCTACA
Prupe_3G246000	bZIP	469	480	+	-0.8125	0.000156	0.303	TGTTGACTTGGA
Prupe_1G478400	bZIP	319	333	-	5.92188	0.00017	0.353	ACGGTTGATGTGACT
Prupe_2G263700	bZIP	951	961	-	8.78125	0.000172	0.254	GTTAGCTGGAA
Prupe_7G112200	bZIP	2006	2023	+	-0.046875	0.000175	0.553	AGAAGGTCACATGGACAA
Prupe_1G434500	bZIP	161	178	-	1.14062	0.000176	0.597	CTAATTTCCTCGTCTGTC
Prupe_3G246000	bZIP	873	884	+	-1.4625	0.00018	0.303	TTCTGCCGAGTC
Prupe_2G263700	bZIP	1058	1068	+	8.60938	0.000183	0.254	TACAGTTGTCA
Prupe_8G267100	bZIP	2007	2021	+	2.6875	0.000188	0.554	GAAGGTCACATGGAC
Prupe_2G182800	bZIP	1578	1592	+	2.73438	0.0002	0.437	TTACACCTGAGATTG
Prupe_3G246000	bZIP	2009	2020	+	-2.2125	0.000223	0.303	AGGTCACATGGA
Prupe_1G197700	bZIP	1896	1906	+	2.60811	0.000252	0.261	TGTAGCTGGCA
Prupe_2G263700	bZIP	1057	1067	-	7.67188	0.000252	0.263	GACAACTGTAA
Prupe_2G056800	bZIP	2007	2021	+	-1.34375	0.000262	0.597	GAAGGTCACATGGAC
Prupe_8G091600	bZIP	159	173	+	0.53125	0.000262	0.655	ATGACAGACGAGGAA
Prupe_8G026300	bZIP	445	456	-	5.60938	0.000267	0.186	TTGCAAGCTAAT
Prupe_6G129100	bZIP	1617	1627	-	3.75	0.000278	0.465	GATGATATCGG
Prupe_6G343100	bZIP	267	278	-	8.61053	0.000285	0.742	GTCTCACGTCCT
Prupe_3G246000	bZIP	757	768	+	-3.4625	0.00029	0.303	CAGTGAAGTGGA
Prupe_8G091600	bZIP	584	598	-	-0.5625	0.000342	0.655	GTCGATGATGTAGCA
Prupe_6G177200	bZIP	319	333	-	2.78125	0.000367	0.428	ACGGTTGATGTGACT
Prupe_6G343100	bZIP	161	172	+	8.01053	0.000373	0.742	GACAGACGAGGA
Prupe_5G027000	bZIP	2007	2021	+	-1.04688	0.000382	0.406	GAAGGTCACATGGAC
Prupe_5G027000	bZIP	951	965	-	-1.07812	0.000385	0.406	TTGGGTTAGCTGGAA
Prupe_2G182800	bZIP	2007	2021	-	-0.078125	0.00039	0.437	GTCCATGTGACCTTC
Prupe_8G267100	bZIP	1578	1592	-	-0.34375	0.000399	0.554	CAATCTCAGGTGTAA
Prupe_1G434500	bZIP	2009	2026	-	-2.3125	0.000401	0.597	CCGTTGTCCATGTGACCT
Prupe_7G150700	bZIP	2012	2021	+	8.51042	0.000405	1	TCACATGGAC
Prupe_5G027000	bZIP	199	213	-	-1.39062	0.000413	0.406	ATTTTTTAAGTGGCA
Prupe_7G112200	bZIP	754	771	+	-3.54688	0.000415	0.553	AAACAGTGAAGTGGAAAA
Prupe_1G508100	bZIP	1017	1033	+	1.28125	0.000424	0.598	ACATTACATCAAATACG
Prupe_1G298200	bZIP	472	479	+	5.56842	0.000436	0.531	TGACTTGG
Prupe_1G298200	bZIP	760	767	+	5.56842	0.000436	0.531	TGAAGTGG
Prupe_1G298200	bZIP	2012	2019	+	5.56842	0.000436	0.531	TCACATGG
Prupe_2G056800	bZIP	755	769	+	-3.73438	0.000443	0.597	AACAGTGAAGTGGAA
Prupe_8G091600	bZIP	755	769	+	-1.95312	0.000472	0.655	AACAGTGAAGTGGAA
Prupe_3G246000	bZIP	585	596	-	-5.5125	0.000476	0.398	CGATGATGTAGC
Prupe_6G177200	bZIP	584	598	-	1.75	0.000477	0.428	GTCGATGATGTAGCA
Prupe_2G056800	bZIP	159	173	+	-4.10938	0.000478	0.597	ATGACAGACGAGGAA
Prupe_6G129100	bZIP	1018	1028	+	1.42188	0.000496	0.465	CATTACATCAA
Prupe_6G177200	bZIP	1074	1088	-	1.51562	0.000506	0.428	AATGCATACATGACC
Prupe_1G298200	bZIP	164	171	+	5.12632	0.000507	0.531	AGACGAGG
Prupe_5G003000	bZIP	320	329	-	7.55072	0.000517	1	TTGATGTGAC
Prupe_5G027000	bZIP	755	769	+	-2.46875	0.000524	0.406	AACAGTGAAGTGGAA
Prupe_7G112200	bZIP	158	175	+	-4.64062	0.000525	0.553	TATGACAGACGAGGAAAT
Prupe_2G182800	bZIP	199	213	+	-1.39062	0.000525	0.437	TGCCACTTAAAAAAT
Prupe_1G508100	bZIP	1070	1086	-	0.28125	0.000542	0.598	TGCATACATGACCTCCT
Prupe_2G041300	bZIP	1015	1029	-	0.71875	0.000546	0.706	TTTGATGTAATGTAA
Prupe_7G150700	bZIP	1578	1587	-	8	0.000564	1	TCAGGTGTAA
Prupe_2G056800	bZIP	199	213	-	-5.03125	0.000573	0.597	ATTTTTTAAGTGGCA
Prupe_5G027000	bZIP	159	173	+	-2.98438	0.000586	0.406	ATGACAGACGAGGAA
Prupe_1G508100	bZIP	580	596	-	-0.0625	0.000589	0.598	CGATGATGTAGCAATAT
Prupe_8G026300	bZIP	221	232	+	2.6875	0.000592	0.353	AGAACAGCTCAG
Prupe_7G112200	bZIP	197	214	-	-5.3125	0.0006	0.553	TATTTTTTAAGTGGCACC
Prupe_2G041300	bZIP	1613	1627	-	0.328125	0.000604	0.706	GATGATATCGGGGAT
Prupe_6G177200	bZIP	1015	1029	+	0.75	0.000612	0.428	TTACATTACATCAAA
Prupe_6G343100	bZIP	265	276	+	6.73684	0.000617	0.742	TTAGGACGTGAG
Prupe_1G478400	bZIP	263	277	+	1.25	0.000631	0.825	TATTAGGACGTGAGA
Prupe_6G177200	bZIP	1613	1627	+	0.5625	0.000642	0.428	ATCCCCGATATCATC
Prupe_1G434500	bZIP	1573	1590	+	-4.53125	0.000644	0.597	AGTATTTACACCTGAGAT
Prupe_2G041300	bZIP	1010	1024	-	0.03125	0.000652	0.706	TGTAATGTAAGCTTG
Prupe_2G182800	bZIP	951	965	+	-2.4375	0.000662	0.437	TTCCAGCTAACCCAA
Prupe_1G434500	bZIP	194	211	+	-4.67188	0.000662	0.597	AACGGTGCCACTTAAAAA
Prupe_6G177200	bZIP	581	595	+	0.375	0.000673	0.428	TATTGCTACATCATC
Prupe_7G073000	bZIP	1616	1630	-	2.3125	0.000675	1	AGGGATGATATCGGG
Prupe_8G267100	bZIP	319	333	-	-2.73438	0.000695	0.554	ACGGTTGATGTGACT
Prupe_7G112200	bZIP	1576	1593	-	-6.15625	0.000703	0.553	TCAATCTCAGGTGTAAAT
Prupe_6G343100	bZIP	3	14	-	6.33684	0.000715	0.742	TACTCACGAGCG
Prupe_6G177200	bZIP	1616	1630	-	0.109375	0.00072	0.428	AGGGATGATATCGGG
Prupe_2G041300	bZIP	581	595	-	-0.375	0.00072	0.706	GATGATGTAGCAATA
Prupe_2G182800	bZIP	755	769	-	-2.85938	0.000725	0.437	TTCCACTTCACTGTT
Prupe_1G508100	bZIP	583	599	+	-0.96875	0.000727	0.598	TTGCTACATCATCGACC
Prupe_6G129100	bZIP	92	102	-	-0.109375	0.000742	0.465	GATGAAGTCGG
Prupe_8G267100	bZIP	91	105	-	-3.125	0.000758	0.554	TCTGATGAAGTCGGA
Prupe_8G026300	bZIP	2093	2104	-	1.59375	0.000765	0.359	TTACCAACTAGA
Prupe_8G026300	bZIP	851	862	+	1.54688	0.000774	0.359	CAACCAACTGTC
Prupe_2G182800	bZIP	467	481	-	-3.17188	0.000775	0.437	ATCCAAGTCAACACA
Prupe_2G182800	bZIP	159	173	-	-3.3125	0.000798	0.437	TTCCTCGTCTGTCAT
Prupe_1G508100	bZIP	1612	1628	-	-1.39062	0.000799	0.598	GGATGATATCGGGGATG
Prupe_7G112200	bZIP	466	483	+	-6.90625	0.0008	0.553	CTGTGTTGACTTGGATTA
Prupe_8G091600	bZIP	2007	2021	+	-4.35938	0.000804	0.745	GAAGGTCACATGGAC
Prupe_8G267100	bZIP	584	598	-	-3.42188	0.00081	0.554	GTCGATGATGTAGCA
Prupe_2G056800	bZIP	1578	1592	-	-6.92188	0.000812	0.606	CAATCTCAGGTGTAA
Prupe_1G434500	bZIP	757	774	-	-5.78125	0.000822	0.597	ATCTTTTCCACTTCACTG
Prupe_1G478400	bZIP	91	105	-	0.125	0.000832	0.825	TCTGATGAAGTCGGA
Prupe_2G182800	bZIP	584	598	+	-3.54688	0.000839	0.437	TGCTACATCATCGAC
Prupe_2G041300	bZIP	316	330	-	-1.0625	0.000848	0.706	GTTGATGTGACTATA
Prupe_6G129100	bZIP	1170	1180	-	-0.765625	0.000851	0.465	GCTTGTGTCGT
Prupe_1G434500	bZIP	469	486	-	-6.03125	0.000862	0.597	ATATAATCCAAGTCAACA
Prupe_8G267100	bZIP	755	769	+	-3.70312	0.000862	0.554	AACAGTGAAGTGGAA
Prupe_1G508100	bZIP	1615	1631	+	-1.73438	0.000863	0.598	CCCCGATATCATCCCTA
Prupe_6G129100	bZIP	1075	1085	-	-0.84375	0.000867	0.465	GCATACATGAC
Prupe_2G056800	bZIP	1544	1558	+	-7.34375	0.000873	0.606	GTAAAATACTTGTCG
Prupe_6G129100	bZIP	479	489	+	-0.953125	0.000887	0.465	GATTATATGAG
Prupe_6G129100	bZIP	266	276	+	-0.96875	0.00089	0.465	TAGGACGTGAG
Prupe_8G091600	bZIP	467	481	+	-4.85938	0.000895	0.745	TGTGTTGACTTGGAT
Prupe_1G197700	bZIP	852	862	-	-2.66216	0.000905	0.75	GACAGTTGGTT
Prupe_7G150700	bZIP	472	481	+	7.19792	0.000914	1	TGACTTGGAT
Prupe_8G267100	bZIP	467	481	+	-4.0625	0.000932	0.554	TGTGTTGACTTGGAT
Prupe_7G112200	bZIP	874	891	-	-8.17188	0.000975	0.578	GAGGGAAGACTCGGCAGA
Prupe_5G003000	bZIP	320	329	+	6.3913	0.000977	1	GTCACATCAA
Prupe_7G073000	bZIP	1429	1443	+	0.9375	0.000988	1	CACGCTTATGACAAG
Prupe_1G478400	bZIP	467	481	+	-0.609375	0.00099	0.825	TGTGTTGACTTGGAT
Prupe_5G003000	bZIP	267	276	-	6.35507	0.000999	1	CTCACGTCCT
Prupe_2G205700	C2H2	757	767	+	12.6094	2.94e-06	0.0123	CAGTGAAGTGG
Prupe_1G338700	C2H2	735	749	+	15.2188	4.6e-06	0.0188	CAAGAAAGACAAAAG
Prupe_1G341000	C2H2	1164	1179	-	12.4459	1.48e-05	0.0602	CTTGTGTCGTTGAGCA
Prupe_8G142400	C2H2	2080	2090	+	12.3692	1.68e-05	0.07	CACACACACTC
Prupe_1G424300	C2H2	2080	2090	+	12.3692	1.68e-05	0.07	CACACACACTC
Prupe_1G338700	C2H2	1808	1822	+	10.2344	7.11e-05	0.13	AACATAAAACAAATT
Prupe_5G159200	C2H2	1882	1893	+	9	7.55e-05	0.222	AAGAACAGAAGT
Prupe_3G128100	C2H2	1447	1466	-	8.32812	8.04e-05	0.187	AAAAAAAGGGCAAAAGTTAA
Prupe_1G341000	C2H2	1451	1466	+	8.24324	8.56e-05	0.12	CTTTTGCCCTTTTTTT
Prupe_7G151500	C2H2	1549	1565	-	8.4375	8.67e-05	0.326	ATTTAAACGACAAGTAT
Prupe_1G341000	C2H2	1550	1565	+	8.14865	8.86e-05	0.12	TACTTGTCGTTTAAAT
Prupe_1G338700	C2H2	713	727	+	9.54688	9.51e-05	0.13	ACAATGAGACAATTA
Prupe_8G055100	C2H2	1976	1990	+	10.1846	0.000104	0.43	ACCTTCCTTGTATGA
Prupe_5G159200	C2H2	1094	1105	+	7.89189	0.000108	0.222	CGAAAGAGAGGT
Prupe_3G048600	C2H2	1548	1565	-	7.5625	0.000113	0.463	ATTTAAACGACAAGTATT
Prupe_3G128100	C2H2	1546	1565	-	7.03125	0.000122	0.187	ATTTAAACGACAAGTATTTT
Prupe_3G128100	C2H2	734	753	+	6.625	0.000138	0.187	GCAAGAAAGACAAAAGGCAA
Prupe_1G551600	C2H2	2054	2072	+	7.325	0.000142	0.289	ACACATTCTCCACTCTCTC
Prupe_3G128100	C2H2	741	760	+	5.625	0.000184	0.187	AGACAAAAGGCAAAAACAGT
Prupe_1G341000	C2H2	734	749	-	6	0.000186	0.19	CTTTTGTCTTTCTTGC
Prupe_7G063400	C2H2	1872	1878	+	12.2027	0.000196	0.639	TTGAAAA
Prupe_2G205700	C2H2	629	639	+	9.96875	0.000196	0.3	GAGTGTAGTTC
Prupe_2G205700	C2H2	1665	1675	+	9.875	0.000216	0.3	CAGTGAAATAA
Prupe_1G551600	C2H2	1249	1267	-	6.31667	0.000227	0.289	TTCCTTTCTCATCCACAAT
Prupe_1G338700	C2H2	420	434	-	6.84375	0.00027	0.225	TGCATCAAACAAAAC
Prupe_1G338700	C2H2	1349	1363	+	6.79688	0.000275	0.225	TGGAAAAGTCAAAGA
Prupe_5G159200	C2H2	143	154	+	4.67568	0.000281	0.318	AAAAAAAGAGTA
Prupe_7G151500	C2H2	1727	1743	+	4.39062	0.000288	0.326	TGGAATGCAACAAATAA
Prupe_1G551600	C2H2	1609	1627	+	5.775	0.00029	0.289	TCCCATCCCCGATATCATC
Prupe_7G063400	C2H2	1296	1302	-	9.14865	0.000305	0.639	TTGAGAA
Prupe_5G159200	C2H2	752	763	+	4.08108	0.00033	0.318	AAAAACAGTGAA
Prupe_2G136700	C2H2	531	538	-	9.5	0.000349	0.498	ATAAGTAG
Prupe_2G136700	C2H2	1313	1320	-	9.5	0.000349	0.498	ATAAGTAG
Prupe_7G151500	C2H2	153	169	+	3.0625	0.000403	0.326	TAAAATATGACAGACGA
Prupe_1G338700	C2H2	780	794	+	5.64062	0.000407	0.277	CGAAAGTAACAAAGA
Prupe_2G205700	C2H2	2058	2068	-	9.1875	0.000415	0.355	GAGTGGAGAAT
Prupe_1G551600	C2H2	2060	2078	+	4.925	0.000422	0.289	TCTCCACTCTCTCTAACAC
Prupe_2G205700	C2H2	2080	2090	-	9.15625	0.000426	0.355	GAGTGTGTGTG
Prupe_5G159200	C2H2	1114	1125	-	3.08108	0.000441	0.318	CCAAACAGAGAA
Prupe_7G151500	C2H2	1450	1466	-	2.60938	0.000451	0.326	AAAAAAAGGGCAAAAGT
Prupe_3G128100	C2H2	712	731	+	2.07812	0.000456	0.334	GACAATGAGACAATTATGAT
Prupe_8G055100	C2H2	94	108	+	7.56923	0.000483	0.776	GACTTCATCAGAGAA
Prupe_3G128100	C2H2	153	172	+	1.75	0.000492	0.334	TAAAATATGACAGACGAGGA
Prupe_6G113300	C2H2	53	70	+	6.31884	0.0005	0.468	CAATTCCCACCTTCGTAC
Prupe_1G551600	C2H2	1474	1492	-	4.53333	0.000501	0.289	CTAAATCCACATTCTTCGC
Prupe_3G048600	C2H2	1164	1181	+	2.60938	0.000513	0.465	TGCTCAACGACACAAGCG
Prupe_5G159200	C2H2	1641	1652	+	2.44595	0.000514	0.318	AAACACAGAGTT
Prupe_8G142400	C2H2	762	772	-	8.44615	0.000527	0.818	CTTTTCCACTT
Prupe_1G424300	C2H2	762	772	-	8.44615	0.000527	0.818	CTTTTCCACTT
Prupe_1G338700	C2H2	1431	1445	+	4.8125	0.000531	0.304	CGCTTATGACAAGAG
Prupe_2G136700	C2H2	760	767	+	8.9375	0.000536	0.498	TGAAGTGG
Prupe_6G113300	C2H2	1617	1634	+	6.14493	0.000539	0.468	CCGATATCATCCCTACAG
Prupe_5G159200	C2H2	1709	1720	+	2.25676	0.000541	0.318	AGAAACTGAGTT
Prupe_2G205700	C2H2	762	772	+	8.84375	0.000558	0.387	AAGTGGAAAAG
Prupe_8G055100	C2H2	955	969	+	7.29231	0.000561	0.776	AGCTAACCCAAAAGC
Prupe_1G551600	C2H2	50	68	+	4.23333	0.000569	0.289	CCCCAATTCCCACCTTCGT
Prupe_7G151500	C2H2	712	728	+	1.60938	0.000572	0.326	GACAATGAGACAATTAT
Prupe_1G551600	C2H2	1210	1228	+	4.15	0.00059	0.289	CCTCAACCTCCCGCTGATT
Prupe_1G338700	C2H2	1120	1134	-	4.40625	0.000603	0.304	TCAACAAGACCAAAC
Prupe_8G142400	C2H2	196	206	+	8.2	0.000606	0.818	CGGTGCCACTT
Prupe_1G424300	C2H2	196	206	+	8.2	0.000606	0.818	CGGTGCCACTT
Prupe_7G151500	C2H2	770	786	+	1.34375	0.000609	0.326	AAGATTTGGACGAAAGT
Prupe_7G063400	C2H2	1063	1069	-	-0.243243	0.000609	0.852	TTGACAA
Prupe_2G136700	C2H2	1685	1692	+	8.71875	0.000614	0.498	GGAAGTGG
Prupe_3G048600	C2H2	1727	1744	+	1.76562	0.000644	0.465	TGGAATGCAACAAATAAT
Prupe_1G551600	C2H2	115	133	+	3.93333	0.000646	0.289	CCTTGACCTTCTCATTATG
Prupe_3G048600	C2H2	712	729	+	1.71875	0.000652	0.465	GACAATGAGACAATTATG
Prupe_3G128100	C2H2	1116	1135	-	0.484375	0.000657	0.366	CTCAACAAGACCAAACAGAG
Prupe_6G113300	C2H2	1711	1728	-	5.65217	0.000665	0.468	CAATTACTAACTCAGTTT
Prupe_1G338700	C2H2	1111	1125	-	4.0625	0.000669	0.304	CCAAACAGAGAAAAC
Prupe_3G048600	C2H2	1449	1466	-	1.60938	0.000671	0.465	AAAAAAAGGGCAAAAGTT
Prupe_6G113300	C2H2	225	242	-	5.6087	0.000677	0.468	CGGTTGTGCCCTGAGCTG
Prupe_3G048600	C2H2	1348	1365	+	1.5625	0.000679	0.465	ATGGAAAAGTCAAAGAAG
Prupe_6G113300	C2H2	1968	1985	+	5.55072	0.000694	0.468	CCAGTCAAACCTTCCTTG
Prupe_5G159200	C2H2	739	750	+	1.21622	0.000712	0.35	AAAGACAAAAGG
Prupe_1G551600	C2H2	872	890	+	3.65833	0.000726	0.289	CTTCTGCCGAGTCTTCCCT
Prupe_1G551600	C2H2	1252	1270	-	3.61667	0.000738	0.289	AAGTTCCTTTCTCATCCAC
Prupe_7G151500	C2H2	1119	1135	-	0.46875	0.000745	0.326	CTCAACAAGACCAAACA
Prupe_2G136700	C2H2	1540	1547	+	8.57812	0.000762	0.498	ATTAGTAA
Prupe_2G136700	C2H2	542	549	-	8.57812	0.000762	0.498	ATTAGTAA
Prupe_7G151500	C2H2	1807	1823	+	0.359375	0.000764	0.326	AAACATAAAACAAATTA
Prupe_6G113300	C2H2	1067	1084	-	5.26087	0.000782	0.468	CATACATGACCTCCTTTG
Prupe_1G341000	C2H2	1120	1135	+	1.12162	0.000784	0.552	GTTTGGTCTTGTTGAG
Prupe_7G151500	C2H2	1430	1446	+	0.21875	0.000789	0.326	ACGCTTATGACAAGAGT
Prupe_6G113300	C2H2	1695	1712	+	5.21739	0.000796	0.468	CCAATACAACTTCCAGAA
Prupe_7G151500	C2H2	734	750	+	0.171875	0.000797	0.326	GCAAGAAAGACAAAAGG
Prupe_8G142400	C2H2	807	817	-	7.75385	0.000798	0.818	TTCAGTCAGTC
Prupe_1G424300	C2H2	807	817	-	7.75385	0.000798	0.818	TTCAGTCAGTC
Prupe_3G128100	C2H2	704	723	+	-0.390625	0.000798	0.366	ATTTTGACGACAATGAGACA
Prupe_5G159200	C2H2	1755	1766	-	0.689189	0.000803	0.35	CTAAACAAAGAG
Prupe_1G551600	C2H2	2057	2075	+	3.34167	0.000828	0.289	CATTCTCCACTCTCTCTAA
Prupe_2G205700	C2H2	176	186	+	8.26562	0.000832	0.495	TAGTGTTGTTC
Prupe_2G136700	C2H2	1718	1725	+	8.375	0.000832	0.498	GTTAGTAA
Prupe_5G159200	C2H2	911	922	+	0.486486	0.000853	0.35	CGAAAGAAAATA
Prupe_3G128100	C2H2	770	789	+	-0.84375	0.000881	0.366	AAGATTTGGACGAAAGTAAC
Prupe_1G551600	C2H2	1993	2011	-	3.175	0.000886	0.289	CCTTCTCACCCACCGGACT
Prupe_6G113300	C2H2	1103	1120	-	4.91304	0.000902	0.468	CAGAGAAAACATCGCACC
Prupe_3G048600	C2H2	704	721	+	0.359375	0.000925	0.476	ATTTTGACGACAATGAGA
Prupe_3G048600	C2H2	153	170	+	0.34375	0.000929	0.476	TAAAATATGACAGACGAG
Prupe_1G341000	C2H2	712	727	-	0.445946	0.000937	0.552	TAATTGTCTCATTGTC
Prupe_5G159200	C2H2	784	795	+	0.135135	0.000937	0.35	AGTAACAAAGAT
Prupe_7G151500	C2H2	779	795	+	-0.59375	0.000946	0.352	ACGAAAGTAACAAAGAT
Prupe_1G341000	C2H2	130	145	-	0.405405	0.000947	0.552	TTTTTTTCTTTCCATA
Prupe_3G128100	C2H2	1409	1428	+	-1.23438	0.000959	0.366	GCTCTAGCGGCAAAAATATA
Prupe_1G551600	C2H2	1950	1968	+	2.95833	0.000969	0.291	CCCATGCATGCCCACCCTC
Prupe_1G338700	C2H2	1635	1649	+	2.79688	0.000972	0.364	AAAATAAAACACAGA
Prupe_1G338700	C2H2	1728	1742	+	2.76562	0.00098	0.364	GGAATGCAACAAATA
Prupe_8G142400	C2H2	811	821	-	7.38462	0.00098	0.818	AACTTTCAGTC
Prupe_1G424300	C2H2	811	821	-	7.38462	0.00098	0.818	AACTTTCAGTC
Prupe_3G128100	C2H2	1430	1449	+	-1.375	0.000989	0.366	ACGCTTATGACAAGAGTTTA
Prupe_1G318500	C3H	438	452	+	6.5625	0.000179	0.274	CCTACAAATTAGCTT
Prupe_1G318500	C3H	186	200	+	6.5	0.000182	0.274	CCGTCCATAACGGTG
Prupe_1G318500	C3H	184	198	-	6.26562	0.000198	0.274	CCGTTATGGACGGAA
Prupe_6G056300	C3H	407	412	+	11.5135	0.00034	0.357	TCAACA
Prupe_6G056300	C3H	469	474	-	11.5135	0.00034	0.357	TCAACA
Prupe_6G056300	C3H	1129	1134	-	11.5135	0.00034	0.357	TCAACA
Prupe_6G056300	C3H	2045	2050	+	11.5135	0.00034	0.357	TCAACA
Prupe_1G318500	C3H	1104	1118	-	4.17188	0.000387	0.403	GAGAAAACATCGCAC
Prupe_1G318500	C3H	90	104	-	2.5625	0.000621	0.517	CTGATGAAGTCGGAG
Prupe_1G318500	C3H	583	597	-	1.89062	0.00075	0.52	TCGATGATGTAGCAA
Prupe_1G318500	C3H	436	450	-	1.17188	0.000911	0.542	GCTAATTTGTAGGGT
Prupe_1G122800	CAMTA	1427	1444	-	12.3906	2.49e-05	0.103	TCTTGTCATAAGCGTGTA
Prupe_8G060300	CAMTA	1428	1436	-	9.41509	0.000341	0.637	TAAGCGTGT
Prupe_8G060300	CAMTA	831	839	-	9.13208	0.00039	0.637	CGTGCGTGT
Prupe_6G187700	CAMTA	395	403	+	8.89474	0.000396	0.61	CCGAGTGAC
Prupe_6G187700	CAMTA	2072	2080	-	8.84211	0.00041	0.61	GCGTGTTAG
Prupe_6G187700	CAMTA	828	836	-	8.72632	0.000437	0.61	GCGTGTCAA
Prupe_8G060300	CAMTA	2075	2083	-	8.66981	0.000466	0.637	TGTGCGTGT
Prupe_1G122800	CAMTA	1429	1446	-	6.51562	0.000603	0.59	ACTCTTGTCATAAGCGTG
Prupe_1G122800	CAMTA	1150	1167	+	6.48438	0.000612	0.59	TGGTAGGTAAAACGTGCT
Prupe_6G187700	CAMTA	878	886	+	7.94737	0.000617	0.646	CCGAGTCTT
Prupe_1G122800	CAMTA	2053	2070	-	6.35938	0.000647	0.59	GAGAGTGGAGAATGTGTT
Prupe_1G122800	CAMTA	1430	1447	+	6.03125	0.000747	0.59	ACGCTTATGACAAGAGTT
Prupe_8G060300	CAMTA	875	883	+	7.11321	0.000824	0.844	CTGCCGAGT
Prupe_1G122800	CAMTA	1599	1616	-	5.71875	0.000855	0.59	GGATGGGAGAATCGAGTA
Prupe_6G187700	CAMTA	1425	1433	-	7.2	0.000857	0.718	GCGTGTATA
Prupe_1G019100	CPP	289	301	-	10.3301	5.28e-05	0.11	TAAAATTTTAAAA
Prupe_1G019100	CPP	292	304	+	10.3301	5.28e-05	0.11	TAAAATTTTAAAA
Prupe_7G233800	CPP	1557	1566	+	9.66327	0.000291	0.46	CGTTTAAATG
Prupe_7G233800	CPP	1557	1566	-	9.39796	0.000354	0.46	CATTTAAACG
Prupe_1G019100	CPP	1325	1337	-	8.53398	0.000419	0.579	TTCAATTTTAAAC
Prupe_7G233800	CPP	1530	1539	+	9.15306	0.000434	0.46	AGTTTGAAAT
Prupe_7G233800	CPP	1908	1917	+	9	0.000494	0.46	TGTTTGAAAC
Prupe_7G233800	CPP	279	288	+	8.38776	0.000662	0.46	TATTTAAATA
Prupe_7G233800	CPP	279	288	-	8.38776	0.000662	0.46	TATTTAAATA
Prupe_7G233800	CPP	495	504	-	7.83673	0.000784	0.468	TCTTTGAATT
Prupe_2G233600	Dof	1447	1467	+	16.8462	4.93e-07	0.00141	TTAACTTTTGCCCTTTTTTTA
Prupe_2G233600	Dof	136	156	-	16.5231	7.04e-07	0.00141	TTTACTCTTTTTTTTTTTCTT
Prupe_5G173100	Dof	1445	1465	-	15.1406	1.85e-06	0.00747	AAAAAAGGGCAAAAGTTAAAC
Prupe_4G061400	Dof	136	156	+	14.9688	2.44e-06	0.00985	AAGAAAAAAAAAAAGAGTAAA
Prupe_2G233600	Dof	134	154	-	14.4615	5.2e-06	0.00692	TACTCTTTTTTTTTTTCTTTC
Prupe_4G061400	Dof	1445	1465	-	14.1406	5.83e-06	0.0118	AAAAAAGGGCAAAAGTTAAAC
Prupe_3G052300	Dof	739	759	+	13.5469	8.88e-06	0.0338	AAAGACAAAAGGCAAAAACAG
Prupe_5G194600	Dof	1445	1463	-	13.6562	1.03e-05	0.0338	AAAAGGGCAAAAGTTAAAC
Prupe_7G142500	Dof	133	153	-	13.3594	1.05e-05	0.0429	ACTCTTTTTTTTTTTCTTTCC
Prupe_4G061400	Dof	1453	1473	-	13.4062	1.18e-05	0.0159	ATTCAATAAAAAAAGGGCAAA
Prupe_5G173100	Dof	735	755	+	13.3281	1.29e-05	0.023	CAAGAAAGACAAAAGGCAAAA
Prupe_5G173100	Dof	136	156	+	13.0312	1.7e-05	0.023	AAGAAAAAAAAAAAGAGTAAA
Prupe_3G052300	Dof	139	159	+	12.75	1.96e-05	0.0338	AAAAAAAAAAAGAGTAAAATA
Prupe_5G194600	Dof	1453	1471	-	12.7188	2.28e-05	0.0338	TCAATAAAAAAAGGGCAAA
Prupe_7G142500	Dof	744	764	-	12.5469	2.32e-05	0.0474	CTTCACTGTTTTTGCCTTTTG
Prupe_5G194600	Dof	138	156	+	12.6094	2.49e-05	0.0338	GAAAAAAAAAAAGAGTAAA
Prupe_3G052300	Dof	1345	1365	+	12.4844	2.5e-05	0.0338	AACATGGAAAAGTCAAAGAAG
Prupe_3G266200	Dof	1456	1465	-	10.7373	4.07e-05	0.169	AAAAAAGGGC
Prupe_4G061400	Dof	735	755	+	11.75	4.66e-05	0.0471	CAAGAAAGACAAAAGGCAAAA
Prupe_2G233600	Dof	131	151	-	11.3385	5.44e-05	0.0377	TCTTTTTTTTTTTCTTTCCAT
Prupe_2G233600	Dof	734	754	-	11.3385	5.44e-05	0.0377	TTTGCCTTTTGTCTTTCTTGC
Prupe_5G194600	Dof	737	755	+	11.5312	5.55e-05	0.0566	AGAAAGACAAAAGGCAAAA
Prupe_2G233600	Dof	733	753	-	11.2769	5.66e-05	0.0377	TTGCCTTTTGTCTTTCTTGCA
Prupe_5G210200	Dof	1452	1465	-	11.3125	8.38e-05	0.347	AAAAAAGGGCAAAA
Prupe_6G253300	Dof	1451	1465	+	11.1562	8.72e-05	0.309	CTTTTGCCCTTTTTT
Prupe_2G233600	Dof	135	155	-	10.5538	8.89e-05	0.0508	TTACTCTTTTTTTTTTTCTTT
Prupe_5G173100	Dof	736	756	+	10.9375	9.01e-05	0.0912	AAGAAAGACAAAAGGCAAAAA
Prupe_5G194600	Dof	1344	1362	+	10.7812	9.17e-05	0.0748	AAACATGGAAAAGTCAAAG
Prupe_4G061400	Dof	1342	1362	+	10.7031	9.79e-05	0.0791	TTAAACATGGAAAAGTCAAAG
Prupe_3G052300	Dof	738	758	+	10.6875	0.000107	0.108	GAAAGACAAAAGGCAAAAACA
Prupe_2G233600	Dof	141	161	-	10.1692	0.000112	0.051	CATATTTTACTCTTTTTTTTT
Prupe_2G233600	Dof	132	152	-	10.1231	0.000115	0.051	CTCTTTTTTTTTTTCTTTCCA
Prupe_5G194600	Dof	738	756	+	10.4062	0.000116	0.0789	GAAAGACAAAAGGCAAAAA
Prupe_4G061400	Dof	736	756	+	10.2969	0.000127	0.0858	AAGAAAGACAAAAGGCAAAAA
Prupe_5G173100	Dof	1342	1362	+	10.2812	0.000139	0.102	TTAAACATGGAAAAGTCAAAG
Prupe_5G173100	Dof	963	983	+	10.1406	0.000152	0.102	CAAAAGCACCTAAAGGGGAAT
Prupe_2G233600	Dof	133	153	-	9.6	0.000155	0.061	ACTCTTTTTTTTTTTCTTTCC
Prupe_2G233600	Dof	1340	1360	-	9.4	0.000173	0.061	TTGACTTTTCCATGTTTAATG
Prupe_2G233600	Dof	130	150	-	9.29231	0.000183	0.061	CTTTTTTTTTTTCTTTCCATA
Prupe_7G142500	Dof	963	983	-	9.84375	0.000189	0.183	ATTCCCCTTTAGGTGCTTTTG
Prupe_6G253300	Dof	1350	1364	-	9.875	0.000192	0.309	TTCTTTGACTTTTCC
Prupe_3G052300	Dof	1450	1470	-	9.8125	0.000193	0.139	CAATAAAAAAAGGGCAAAAGT
Prupe_7G142500	Dof	745	765	-	9.76562	0.000198	0.183	ACTTCACTGTTTTTGCCTTTT
Prupe_3G052300	Dof	1442	1462	-	9.70312	0.000206	0.139	AAAGGGCAAAAGTTAAACTCT
Prupe_5G210200	Dof	1444	1457	-	9.9375	0.000213	0.442	GCAAAAGTTAAACT
Prupe_4G061400	Dof	138	158	+	9.40625	0.000217	0.126	GAAAAAAAAAAAGAGTAAAAT
Prupe_2G233600	Dof	129	149	-	8.93846	0.000222	0.0675	TTTTTTTTTTTCTTTCCATAA
Prupe_7G142500	Dof	780	800	-	9.57812	0.000223	0.183	CCTATATCTTTGTTACTTTCG
Prupe_2G233600	Dof	1800	1820	-	8.81538	0.000236	0.0675	TTTGTTTTATGTTTTTGGTCT
Prupe_2G233600	Dof	128	148	-	8.67692	0.000254	0.0677	TTTTTTTTTTCTTTCCATAAT
Prupe_3G266200	Dof	1049	1058	-	9.33898	0.000268	0.392	AATAAAGCGG
Prupe_7G093900	Dof	1455	1465	-	9.98438	0.000271	0.719	AAAAAAGGGCA
Prupe_3G266200	Dof	962	971	+	9.29661	0.000283	0.392	CCAAAAGCAC
Prupe_7G142500	Dof	1444	1464	+	9.09375	0.000299	0.202	AGTTTAACTTTTGCCCTTTTT
Prupe_6G253300	Dof	1443	1457	+	8.92188	0.000315	0.309	GAGTTTAACTTTTGC
Prupe_5G173100	Dof	1453	1473	-	8.76562	0.00033	0.191	ATTCAATAAAAAAAGGGCAAA
Prupe_7G093900	Dof	1350	1360	+	9.53125	0.000347	0.719	GGAAAAGTCAA
Prupe_7G142500	Dof	145	165	-	8.82812	0.000348	0.202	CTGTCATATTTTACTCTTTTT
Prupe_6G253300	Dof	1044	1058	+	8.45312	0.000393	0.309	TGTCTCCGCTTTATT
Prupe_7G142500	Dof	911	931	-	8.59375	0.000396	0.202	ATGATTTTCTATTTTCTTTCG
Prupe_5G194600	Dof	1562	1580	+	8.09375	0.000402	0.234	AAATGGATAAAAGTATTTA
Prupe_6G253300	Dof	744	758	-	8.32812	0.000416	0.309	TGTTTTTGCCTTTTG
Prupe_5G210200	Dof	1350	1363	+	8.51562	0.000449	0.56	GGAAAAGTCAAAGA
Prupe_7G142500	Dof	737	757	-	8.35938	0.000449	0.204	GTTTTTGCCTTTTGTCTTTCT
Prupe_4G061400	Dof	963	983	+	8.01562	0.00045	0.227	CAAAAGCACCTAAAGGGGAAT
Prupe_5G194600	Dof	965	983	+	7.75	0.000471	0.24	AAAGCACCTAAAGGGGAAT
Prupe_6G253300	Dof	743	757	-	8	0.00048	0.309	GTTTTTGCCTTTTGT
Prupe_2G233600	Dof	740	760	-	7.27692	0.000503	0.125	ACTGTTTTTGCCTTTTGTCTT
Prupe_3G266200	Dof	1290	1299	-	8.63559	0.000514	0.533	AGAAAAGCAA
Prupe_6G253300	Dof	1285	1299	+	7.78125	0.000527	0.309	TACTATTGCTTTTCT
Prupe_2G233600	Dof	756	776	-	7.15385	0.000533	0.125	AAATCTTTTCCACTTCACTGT
Prupe_7G142500	Dof	1037	1057	+	7.90625	0.000566	0.214	ATGACTGTGTCTCCGCTTTAT
Prupe_7G142500	Dof	1278	1298	+	7.875	0.000575	0.214	ATTGATATACTATTGCTTTTC
Prupe_5G173100	Dof	1046	1066	-	7.5	0.000596	0.301	ACAACTGTAATAAAGCGGAGA
Prupe_6G253300	Dof	971	985	-	7.35938	0.000625	0.321	GAATTCCCCTTTAGG
Prupe_4G061400	Dof	1560	1580	+	7.28125	0.00063	0.283	TTAAATGGATAAAAGTATTTA
Prupe_5G210200	Dof	971	984	+	7.60938	0.000668	0.56	CCTAAAGGGGAATT
Prupe_5G194600	Dof	1452	1470	-	6.90625	0.000674	0.305	CAATAAAAAAAGGGCAAAA
Prupe_2G233600	Dof	142	162	-	6.58462	0.000687	0.149	TCATATTTTACTCTTTTTTTT
Prupe_5G210200	Dof	743	756	+	7.5	0.000698	0.56	ACAAAAGGCAAAAA
Prupe_3G052300	Dof	957	977	+	7.40625	0.000703	0.407	CTAACCCAAAAGCACCTAAAG
Prupe_2G233600	Dof	1446	1466	+	6.50769	0.000711	0.149	TTTAACTTTTGCCCTTTTTTT
Prupe_6G253300	Dof	144	158	-	6.75	0.000786	0.359	ATTTTACTCTTTTTT
Prupe_4G061400	Dof	1046	1066	-	6.70312	0.000803	0.325	ACAACTGTAATAAAGCGGAGA
Prupe_5G210200	Dof	144	157	+	7.04688	0.000833	0.56	AAAAAAGAGTAAAA
Prupe_3G052300	Dof	1043	1063	-	6.89062	0.000879	0.444	ACTGTAATAAAGCGGAGACAC
Prupe_7G142500	Dof	147	167	-	6.84375	0.000924	0.315	GTCTGTCATATTTTACTCTTT
Prupe_7G093900	Dof	944	954	-	6.92188	0.000926	0.809	GGAAAAGTCTC
Prupe_5G194600	Dof	1046	1064	-	6.0625	0.000931	0.379	AACTGTAATAAAGCGGAGA
Prupe_5G210200	Dof	1045	1058	-	6.70312	0.000945	0.56	AATAAAGCGGAGAC
Prupe_3G266200	Dof	744	753	+	7.83051	0.000958	0.797	CAAAAGGCAA
Prupe_7G093900	Dof	971	981	+	6.78125	0.000962	0.809	CCTAAAGGGGA
Prupe_7G093900	Dof	1447	1457	-	6.71875	0.000976	0.809	GCAAAAGTTAA
Prupe_3G052300	Dof	1449	1469	-	6.60938	0.000985	0.444	AATAAAAAAAGGGCAAAAGTT
Prupe_5G180000	E2F/DP	876	896	+	-4.50725	0.000191	0.54	TGCCGAGTCTTCCCTCCAGAC
Prupe_1G366800	E2F/DP	1763	1777	+	3.31579	0.000215	0.637	TTAGGGTAGCCAAAT
Prupe_5G180000	E2F/DP	1086	1106	-	-7.43478	0.000361	0.54	CACCTCTCTTTCGTGCTAAAT
Prupe_1G366800	E2F/DP	1746	1760	-	0.905263	0.000426	0.637	AAAGAGGCCCCTAAG
Prupe_1G366800	E2F/DP	1228	1242	-	0.589474	0.00046	0.637	GAATTGGTGCCACAA
Prupe_5G180000	E2F/DP	1410	1430	-	-9.26087	0.000526	0.54	TGTATATTTTTGCCGCTAGAG
Prupe_5G180000	E2F/DP	795	815	-	-9.5942	0.000563	0.54	CAGTCAGTCTACCTGCCTATA
Prupe_1G366800	E2F/DP	580	594	-	-0.621053	0.000625	0.65	ATGATGTAGCAATAT
Prupe_1G366800	E2F/DP	1128	1142	-	-1.47368	0.000782	0.65	AAGAGGGCTCAACAA
Prupe_5G180000	E2F/DP	175	195	+	-11.3768	0.000803	0.54	TTAGTGTTGTTCCGTCCATAA
Prupe_5G180000	E2F/DP	942	962	+	-11.4783	0.000819	0.54	AAGAGACTTTTCCAGCTAACC
Prupe_5G180000	E2F/DP	1616	1636	+	-12.0435	0.000914	0.54	CCCGATATCATCCCTACAGAA
Prupe_1G366800	E2F/DP	1041	1055	-	-2.36842	0.00097	0.672	AAAGCGGAGACACAG
Prupe_2G058500	EIL	503	517	+	9.66038	0.000161	0.671	GACCAAATACAGTTT
Prupe_2G058400	EIL	503	517	+	9.66038	0.000161	0.671	GACCAAATACAGTTT
Prupe_2G058500	EIL	1474	1488	-	8.0566	0.000418	0.776	ATCCACATTCTTCGC
Prupe_2G058400	EIL	1474	1488	-	8.0566	0.000418	0.776	ATCCACATTCTTCGC
Prupe_2G058500	EIL	106	120	+	7.50943	0.000566	0.776	GAATGGGTTCCTTGA
Prupe_2G058400	EIL	106	120	+	7.50943	0.000566	0.776	GAATGGGTTCCTTGA
Prupe_6G018200	EIL	501	521	+	4.5	0.000589	1	AAGACCAAATACAGTTTTTAA
Prupe_6G018200	EIL	1470	1490	-	4.2625	0.000638	1	AAATCCACATTCTTCGCATTC
Prupe_2G058500	EIL	101	115	-	6.58491	0.000923	0.776	GAACCCATTCTCTGA
Prupe_2G058400	EIL	101	115	-	6.58491	0.000923	0.776	GAACCCATTCTCTGA
Prupe_2G058500	EIL	1510	1524	-	6.56604	0.000932	0.776	GCCTAAGTTCCCCGA
Prupe_2G058400	EIL	1510	1524	-	6.56604	0.000932	0.776	GCCTAAGTTCCCCGA
Prupe_2G253000	ERF	196	205	+	12.3678	3.03e-05	0.122	CGGTGCCACT
Prupe_2G306400	ERF	324	344	+	8.05797	3.77e-05	0.153	CATCAACCGTCTTTACCAGCA
Prupe_2G256900	ERF	326	346	-	8.26087	5.12e-05	0.198	CTTGCTGGTAAAGACGGTTGA
Prupe_6G231500	ERF	321	335	+	9.79688	5.94e-05	0.245	TCACATCAACCGTCT
Prupe_1G372100	ERF	321	335	+	9.125	6.88e-05	0.284	TCACATCAACCGTCT
Prupe_4G055600	ERF	320	336	-	5.48438	7.99e-05	0.331	AAGACGGTTGATGTGAC
Prupe_1G390800	ERF	323	341	-	7.84375	8.49e-05	0.348	TGGTAAAGACGGTTGATGT
Prupe_3G032300	ERF	324	344	-	7.0625	8.57e-05	0.351	TGCTGGTAAAGACGGTTGATG
Prupe_1G546100	ERF	88	102	-	8.20312	0.000101	0.145	GATGAAGTCGGAGAT
Prupe_1G546100	ERF	326	340	-	8.1875	0.000102	0.145	GGTAAAGACGGTTGA
Prupe_1G546100	ERF	58	72	-	8.10938	0.000105	0.145	GGGTACGAAGGTGGG
Prupe_1G545700	ERF	325	344	+	8.50769	0.000105	0.313	ATCAACCGTCTTTACCAGCA
Prupe_6G354000	ERF	58	72	-	7.6875	0.000106	0.181	GGGTACGAAGGTGGG
Prupe_1G001700	ERF	327	346	+	7.39062	0.000109	0.355	CAACCGTCTTTACCAGCAAG
Prupe_2G129300	ERF	325	339	+	5.07812	0.000117	0.48	ATCAACCGTCTTTAC
Prupe_1G500900	ERF	1949	1968	+	5.625	0.00013	0.387	TCCCATGCATGCCCACCCTC
Prupe_7G194400	ERF	324	337	-	8.71875	0.00014	0.323	AAAGACGGTTGATG
Prupe_4G222300	ERF	1187	1207	-	7.26562	0.00015	0.363	CCATGCCCATCAAAACCACCA
Prupe_6G354000	ERF	326	340	-	6.71875	0.00015	0.181	GGTAAAGACGGTTGA
Prupe_2G256900	ERF	2044	2064	-	5.55072	0.000151	0.198	GGAGAATGTGTTTGTGTTGAT
Prupe_6G354000	ERF	1232	1246	-	6.53125	0.00016	0.181	GCCTGAATTGGTGCC
Prupe_5G062000	ERF	321	335	+	6.15625	0.000161	0.378	TCACATCAACCGTCT
Prupe_1G001700	ERF	89	108	+	5.59375	0.000174	0.355	TCTCCGACTTCATCAGAGAA
Prupe_7G194400	ERF	86	99	-	8.10938	0.000174	0.323	GAAGTCGGAGATTG
Prupe_2G272400	ERF	325	339	-	2.75	0.000177	0.736	GTAAAGACGGTTGAT
Prupe_5G062000	ERF	86	100	+	5.84375	0.000182	0.378	CAATCTCCGACTTCA
Prupe_1G310100	ERF	321	335	+	5.54688	0.000182	0.588	TCACATCAACCGTCT
Prupe_6G354000	ERF	188	202	+	6.125	0.000183	0.181	GTCCATAACGGTGCC
Prupe_8G230600	ERF	196	203	+	7.75238	0.000185	0.726	CGGTGCCA
Prupe_4G051200	ERF	196	203	+	7.75238	0.000185	0.727	CGGTGCCA
Prupe_4G222300	ERF	315	335	+	6.75	0.000187	0.363	ATATAGTCACATCAACCGTCT
Prupe_2G256900	ERF	88	108	-	4.97101	0.000188	0.198	TTCTCTGATGAAGTCGGAGAT
Prupe_1G480400	ERF	2050	2070	+	2.28986	0.000192	0.292	ACAAACACATTCTCCACTCTC
Prupe_2G253000	ERF	1900	1909	-	9.24138	0.000194	0.393	CAGTGCCAGC
Prupe_1G545700	ERF	316	335	+	7.24615	0.000195	0.313	TATAGTCACATCAACCGTCT
Prupe_2G256900	ERF	1995	2015	+	4.84058	0.000198	0.198	TCCGGTGGGTGAGAAGGTCAC
Prupe_6G354000	ERF	88	102	-	5.59375	0.000218	0.181	GATGAAGTCGGAGAT
Prupe_1G546100	ERF	1166	1180	-	6.09375	0.000223	0.231	GCTTGTGTCGTTGAG
Prupe_1G480400	ERF	1185	1205	-	1.84058	0.000225	0.292	ATGCCCATCAAAACCACCACA
Prupe_1G545700	ERF	1469	1488	-	6.90769	0.00023	0.313	ATCCACATTCTTCGCATTCA
Prupe_7G066700	ERF	1185	1195	-	3.82812	0.000235	0.438	AAACCACCACA
Prupe_7G194400	ERF	180	193	-	7.1875	0.000235	0.323	ATGGACGGAACAAC
Prupe_6G165700	ERF	325	343	-	5.46875	0.000235	0.635	GCTGGTAAAGACGGTTGAT
Prupe_2G289500	ERF	590	602	-	6.35938	0.000239	0.771	TTGGGTCGATGAT
Prupe_2G256900	ERF	58	78	-	4.30435	0.00024	0.198	TATTATGGGTACGAAGGTGGG
Prupe_5G090700	ERF	705	719	+	6.89062	0.000252	0.916	TTTTGACGACAATGA
Prupe_2G190200	ERF	326	340	-	3.5	0.00026	0.415	GGTAAAGACGGTTGA
Prupe_1G480400	ERF	326	346	+	1.28986	0.000274	0.292	TCAACCGTCTTTACCAGCAAG
Prupe_6G004400	ERF	321	335	+	5.9375	0.000275	0.792	TCACATCAACCGTCT
Prupe_2G306400	ERF	1210	1230	+	2.30435	0.00028	0.452	CCTCAACCTCCCGCTGATTTG
Prupe_1G372100	ERF	193	207	-	5.45312	0.000282	0.383	TAAGTGGCACCGTTA
Prupe_2G190200	ERF	1166	1180	-	2.98438	0.000289	0.415	GCTTGTGTCGTTGAG
Prupe_6G354000	ERF	1045	1059	-	4.6875	0.000289	0.2	TAATAAAGCGGAGAC
Prupe_4G055600	ERF	1186	1202	+	0.671875	0.000292	0.605	GTGGTGGTTTTGATGGG
Prupe_2G190200	ERF	88	102	-	2.78125	0.000302	0.415	GATGAAGTCGGAGAT
Prupe_2G123200	ERF	324	338	-	3.4375	0.000303	0.822	TAAAGACGGTTGATG
Prupe_6G231500	ERF	585	599	+	4.54688	0.000312	0.337	GCTACATCATCGACC
Prupe_1G390800	ERF	187	205	+	4.29688	0.000313	0.41	CGTCCATAACGGTGCCACT
Prupe_7G066700	ERF	194	204	-	2.70312	0.000315	0.438	GTGGCACCGTT
Prupe_7G066700	ERF	324	334	+	2.6875	0.000316	0.438	CATCAACCGTC
Prupe_1G212700	ERF	185	205	-	3.39062	0.000337	0.913	AGTGGCACCGTTATGGACGGA
Prupe_1G139600	ERF	86	100	+	3.39062	0.000337	0.8	CAATCTCCGACTTCA
Prupe_1G001700	ERF	1167	1186	+	2.40625	0.000341	0.463	TCAACGACACAAGCGATGTG
Prupe_6G231500	ERF	1187	1201	-	4.26562	0.000341	0.337	CCATCAAAACCACCA
Prupe_1G500900	ERF	1999	2018	-	1.84375	0.000345	0.387	CATGTGACCTTCTCACCCAC
Prupe_4G222300	ERF	47	67	+	5.20312	0.00035	0.363	GTACCCCAATTCCCACCTTCG
Prupe_4G222300	ERF	1994	2014	-	5.1875	0.000353	0.363	TGACCTTCTCACCCACCGGAC
Prupe_1G500900	ERF	77	96	+	1.59375	0.000367	0.387	TATTTTAATCAATCTCCGAC
Prupe_2G256900	ERF	2050	2070	-	3.07246	0.00037	0.254	GAGAGTGGAGAATGTGTTTGT
Prupe_5G114100	ERF	1414	1421	-	5.62105	0.000381	1	TTGCCGCT
Prupe_1G480400	ERF	320	340	+	0.318841	0.000383	0.292	GTCACATCAACCGTCTTTACC
Prupe_6G231500	ERF	231	245	+	3.6875	0.000405	0.337	AGGGCACAACCGAGA
Prupe_1G390800	ERF	55	73	-	3.3125	0.000434	0.41	TGGGTACGAAGGTGGGAAT
Prupe_2G256900	ERF	1206	1226	-	2.5942	0.000436	0.256	TCAGCGGGAGGTTGAGGTTCC
Prupe_1G480400	ERF	871	891	+	-0.101449	0.000442	0.292	ACTTCTGCCGAGTCTTCCCTC
Prupe_1G212700	ERF	323	343	+	2.53125	0.000444	0.913	ACATCAACCGTCTTTACCAGC
Prupe_1G139600	ERF	193	207	-	2.48438	0.000444	0.8	TAAGTGGCACCGTTA
Prupe_4G176200	ERF	324	338	+	0.75	0.000445	1	CATCAACCGTCTTTA
Prupe_1G480400	ERF	2044	2064	+	-0.130435	0.000446	0.292	ATCAACACAAACACATTCTCC
Prupe_1G372100	ERF	1187	1201	-	4.0625	0.000448	0.383	CCATCAAAACCACCA
Prupe_1G372100	ERF	53	67	+	4.04688	0.00045	0.383	CAATTCCCACCTTCG
Prupe_1G546100	ERF	2025	2039	-	3.92188	0.000461	0.382	TGTGATGTTGGTTCC
Prupe_6G165700	ERF	873	891	-	3.48438	0.000467	0.635	GAGGGAAGACTCGGCAGAA
Prupe_1G500900	ERF	194	213	-	0.515625	0.000477	0.387	ATTTTTTAAGTGGCACCGTT
Prupe_2G123200	ERF	1164	1178	-	0.40625	0.000479	0.822	TTGTGTCGTTGAGCA
Prupe_6G231500	ERF	2020	2034	+	2.98438	0.000496	0.337	ACAACGGAACCAACA
Prupe_6G231500	ERF	845	859	+	2.96875	0.000498	0.337	CCAAATCAACCAACT
Prupe_4G055600	ERF	1996	2012	+	-1.625	0.000505	0.698	CCGGTGGGTGAGAAGGT
Prupe_1G545700	ERF	2015	2034	+	5.18462	0.000506	0.401	CATGGACAACGGAACCAACA
Prupe_2G306400	ERF	1204	1224	+	0.26087	0.000513	0.452	ATGGAACCTCAACCTCCCGCT
Prupe_1G500900	ERF	47	66	+	0.203125	0.000514	0.387	GTACCCCAATTCCCACCTTC
Prupe_2G256900	ERF	2059	2079	-	2.08696	0.000516	0.266	CGTGTTAGAGAGAGTGGAGAA
Prupe_1G390800	ERF	85	103	-	2.76562	0.000516	0.41	TGATGAAGTCGGAGATTGA
Prupe_1G310100	ERF	193	207	-	2.23438	0.000539	0.588	TAAGTGGCACCGTTA
Prupe_3G032300	ERF	872	892	-	1.15625	0.000542	1	GGAGGGAAGACTCGGCAGAAG
Prupe_1G500900	ERF	315	334	+	-0.203125	0.000565	0.387	ATATAGTCACATCAACCGTC
Prupe_6G004400	ERF	1413	1427	-	3.125	0.000566	0.792	ATATTTTTGCCGCTA
Prupe_4G222300	ERF	1184	1204	-	3.9375	0.000568	0.378	TGCCCATCAAAACCACCACAC
Prupe_1G390800	ERF	1988	2006	+	2.45312	0.000569	0.41	TGAGAAGTCCGGTGGGTGA
Prupe_5G062000	ERF	1207	1221	+	2.6875	0.00057	0.632	GAACCTCAACCTCCC
Prupe_1G310100	ERF	1207	1221	+	2.04688	0.00057	0.588	GAACCTCAACCTCCC
Prupe_2G272400	ERF	1183	1197	+	-2.1875	0.000571	0.928	TGTGTGGTGGTTTTG
Prupe_1G001700	ERF	183	202	+	-0.28125	0.000571	0.579	GTTCCGTCCATAACGGTGCC
Prupe_4G222300	ERF	186	206	+	3.92188	0.000572	0.378	CCGTCCATAACGGTGCCACTT
Prupe_6G231500	ERF	1038	1052	-	2.46875	0.000573	0.337	GCGGAGACACAGTCA
Prupe_1G545700	ERF	1298	1317	+	4.89231	0.000576	0.401	CTCAAAAACCACAACCTACT
Prupe_1G513600	ERF	1149	1158	-	8.02105	0.000579	1	TACCTACCAG
Prupe_2G289500	ERF	88	100	-	0.03125	0.000585	0.771	TGAAGTCGGAGAT
Prupe_1G545700	ERF	1061	1080	-	4.84615	0.000588	0.401	CATGACCTCCTTTGACAACT
Prupe_6G165700	ERF	185	203	+	2.76562	0.000591	0.635	TCCGTCCATAACGGTGCCA
Prupe_1G390800	ERF	1209	1227	-	2.28125	0.0006	0.41	ATCAGCGGGAGGTTGAGGT
Prupe_1G480400	ERF	1470	1490	-	-1.07246	0.00061	0.292	AAATCCACATTCTTCGCATTC
Prupe_6G165700	ERF	381	399	+	2.64062	0.000616	0.635	CCCACAGATTTCGCCCGAG
Prupe_1G513600	ERF	1214	1223	+	7.88421	0.00063	1	AACCTCCCGC
Prupe_6G004400	ERF	1040	1054	+	2.625	0.00063	0.792	ACTGTGTCTCCGCTT
Prupe_1G480400	ERF	323	343	+	-1.21739	0.00064	0.292	ACATCAACCGTCTTTACCAGC
Prupe_4G222300	ERF	50	70	+	3.60938	0.000641	0.378	CCCCAATTCCCACCTTCGTAC
Prupe_1G480400	ERF	2047	2067	+	-1.26087	0.000649	0.292	AACACAAACACATTCTCCACT
Prupe_6G354000	ERF	1682	1696	+	1.78125	0.000651	0.32	ATTGGAAGTGGTTCC
Prupe_2G306400	ERF	184	204	-	-0.652174	0.000662	0.452	GTGGCACCGTTATGGACGGAA
Prupe_2G272400	ERF	57	71	-	-2.90625	0.00067	0.928	GGTACGAAGGTGGGA
Prupe_1G372100	ERF	1994	2008	-	2.71875	0.000684	0.383	TCTCACCCACCGGAC
Prupe_6G354000	ERF	1062	1076	+	1.57812	0.000686	0.32	GTTGTCAAAGGAGGT
Prupe_6G354000	ERF	2059	2073	-	1.53125	0.000694	0.32	AGAGAGAGTGGAGAA
Prupe_1G390800	ERF	1229	1247	-	1.78125	0.000699	0.41	GGCCTGAATTGGTGCCACA
Prupe_2G129300	ERF	2024	2038	+	-2.57812	0.000707	0.994	CGGAACCAACATCAC
Prupe_1G001700	ERF	59	78	+	-1.34375	0.00071	0.579	CCACCTTCGTACCCATAATA
Prupe_1G372100	ERF	845	859	+	2.59375	0.000711	0.383	CCAAATCAACCAACT
Prupe_1G480400	ERF	1296	1316	+	-1.55072	0.000713	0.292	TTCTCAAAAACCACAACCTAC
Prupe_2G289500	ERF	1166	1178	-	-0.75	0.000717	0.771	TTGTGTCGTTGAG
Prupe_1G372100	ERF	1207	1221	+	2.54688	0.000721	0.383	GAACCTCAACCTCCC
Prupe_2G129300	ERF	1131	1145	+	-2.6875	0.000724	0.994	TTGAGCCCTCTTTGC
Prupe_5G062000	ERF	324	338	+	1.96875	0.000725	0.632	CATCAACCGTCTTTA
Prupe_1G545700	ERF	1997	2016	-	4.33846	0.000734	0.429	TGTGACCTTCTCACCCACCG
Prupe_1G372100	ERF	1184	1198	-	2.45312	0.000741	0.383	TCAAAACCACCACAC
Prupe_5G090700	ERF	588	602	-	2.20312	0.000749	0.916	TTGGGTCGATGATGT
Prupe_3G032300	ERF	86	106	-	-0.0625	0.000755	1	CTCTGATGAAGTCGGAGATTG
Prupe_1G513600	ERF	1992	2001	-	7.61053	0.000762	1	CACCGGACTT
Prupe_7G066700	ERF	1217	1227	+	-0.890625	0.000764	0.794	CTCCCGCTGAT
Prupe_1G037900	ERF	1040	1067	+	-6.60938	0.000794	1	ACTGTGTCTCCGCTTTATTACAGTTGTC
Prupe_7G194400	ERF	1992	2005	+	0.796875	0.000809	0.706	AAGTCCGGTGGGTG
Prupe_1G480400	ERF	1467	1487	-	-1.97101	0.000816	0.304	TCCACATTCTTCGCATTCAAT
Prupe_1G310100	ERF	1184	1198	-	0.828125	0.000817	0.588	TCAAAACCACCACAC
Prupe_5G090700	ERF	324	338	-	1.75	0.000823	0.916	TAAAGACGGTTGATG
Prupe_5G062000	ERF	193	207	-	1.57812	0.000824	0.632	TAAGTGGCACCGTTA
Prupe_8G125100	ERF	1044	1058	-	0.671875	0.000827	1	AATAAAGCGGAGACA
Prupe_1G310100	ERF	324	338	+	0.78125	0.000828	0.588	CATCAACCGTCTTTA
Prupe_1G310100	ERF	1994	2008	-	0.6875	0.00085	0.588	TCTCACCCACCGGAC
Prupe_7G194400	ERF	1958	1971	-	0.328125	0.000854	0.706	CTGGAGGGTGGGCA
Prupe_2G289500	ERF	706	718	-	-1.375	0.000865	0.771	CATTGTCGTCAAA
Prupe_1G037900	ERF	1892	1919	+	-7.04688	0.000866	1	GTCTTGTAGCTGGCACTGTTTGAAACTC
Prupe_1G390800	ERF	1244	1262	+	1.04688	0.000869	0.446	GGCCCATTGTGGATGAGAA
Prupe_2G306400	ERF	1241	1261	-	-1.71014	0.000879	0.452	TCTCATCCACAATGGGCCTGA
Prupe_5G090700	ERF	704	718	-	1.42188	0.000882	0.916	CATTGTCGTCAAAAT
Prupe_1G139600	ERF	321	335	+	0.078125	0.000886	0.8	TCACATCAACCGTCT
Prupe_1G546100	ERF	590	604	-	1.75	0.000889	0.577	ATTTGGGTCGATGAT
Prupe_2G190200	ERF	58	72	-	-2.54688	0.000891	0.81	GGGTACGAAGGTGGG
Prupe_1G480400	ERF	46	66	+	-2.26087	0.000895	0.305	TGTACCCCAATTCCCACCTTC
Prupe_4G055600	ERF	1249	1265	+	-4.1875	0.000899	0.93	ATTGTGGATGAGAAAGG
Prupe_1G139600	ERF	324	338	+	0	0.000906	0.8	CATCAACCGTCTTTA
Prupe_5G062000	ERF	1187	1201	-	1.26562	0.000912	0.632	CCATCAAAACCACCA
Prupe_4G176200	ERF	190	204	-	-2.01562	0.000915	1	GTGGCACCGTTATGG
Prupe_6G231500	ERF	1994	2008	-	0.65625	0.000916	0.472	TCTCACCCACCGGAC
Prupe_1G500900	ERF	1039	1058	-	-2.3125	0.00092	0.51	AATAAAGCGGAGACACAGTC
Prupe_2G123200	ERF	86	100	-	-2.45312	0.000922	0.822	TGAAGTCGGAGATTG
Prupe_2G289500	ERF	2025	2037	-	-1.57812	0.000923	0.771	TGATGTTGGTTCC
Prupe_2G306400	ERF	56	76	+	-1.89855	0.000923	0.452	TTCCCACCTTCGTACCCATAA
Prupe_1G545700	ERF	84	103	+	3.8	0.000924	0.434	ATCAATCTCCGACTTCATCA
Prupe_2G123200	ERF	234	248	-	-2.48438	0.000931	0.822	GCTTCTCGGTTGTGC
Prupe_6G354000	ERF	1179	1193	+	0.28125	0.000944	0.391	GCGATGTGTGGTGGT
Prupe_4G222300	ERF	80	100	+	2.51562	0.000947	0.488	TTTAATCAATCTCCGACTTCA
Prupe_1G037900	ERF	83	110	+	-7.51562	0.000951	1	AATCAATCTCCGACTTCATCAGAGAATG
Prupe_1G545700	ERF	322	341	+	3.72308	0.000954	0.434	CACATCAACCGTCTTTACCA
Prupe_6G004400	ERF	177	191	+	0.484375	0.000956	0.792	AGTGTTGTTCCGTCC
Prupe_6G004400	ERF	2021	2035	-	0.46875	0.000959	0.792	ATGTTGGTTCCGTTG
Prupe_2G306400	ERF	53	73	+	-2.05797	0.000963	0.452	CAATTCCCACCTTCGTACCCA
Prupe_1G139600	ERF	1040	1054	+	-0.234375	0.000966	0.8	ACTGTGTCTCCGCTT
Prupe_2G306400	ERF	180	200	+	-2.10145	0.000973	0.452	GTTGTTCCGTCCATAACGGTG
Prupe_1G546100	ERF	25	39	-	1.42188	0.000975	0.577	AACAGGGATGGAGAT
Prupe_2G190200	ERF	188	202	+	-3.01562	0.000982	0.81	GTCCATAACGGTGCC
Prupe_2G123200	ERF	375	389	-	-2.70312	0.00099	0.822	ATCTGTGGGTAACTC
Prupe_1G513600	ERF	999	1008	+	7.14737	0.000993	1	GACCAACCTA
Prupe_1G500900	ERF	579	598	+	-2.65625	0.000993	0.51	TATATTGCTACATCATCGAC
Prupe_2G306400	ERF	1959	1979	+	-2.2029	0.000999	0.452	GCCCACCCTCCAGTCAAACCT
Prupe_3G186200	FAR1	830	841	+	7.73913	0.000242	0.295	GACACGCACGAG
Prupe_3G186200	FAR1	1215	1226	+	7.17391	0.000303	0.295	ACCTCCCGCTGA
Prupe_3G186200	FAR1	2074	2085	+	7	0.000324	0.295	AACACGCACACA
Prupe_3G186200	FAR1	1158	1169	+	6.89855	0.000338	0.295	AAAACGTGCTCA
Prupe_3G186200	FAR1	1996	2007	-	6.49275	0.0004	0.295	CTCACCCACCGG
Prupe_3G186200	FAR1	1960	1971	+	6.33333	0.000428	0.295	CCCACCCTCCAG
Prupe_3G186100	FAR1	1156	1170	+	-2.3125	0.000564	0.995	GTAAAACGTGCTCAA
Prupe_3G186200	FAR1	1174	1185	+	5.3913	0.000637	0.376	CACAAGCGATGT
Prupe_3G186100	FAR1	2072	2086	+	-3.42188	0.00071	0.995	CTAACACGCACACAC
Prupe_3G186100	FAR1	828	842	+	-3.46875	0.000718	0.995	TTGACACGCACGAGG
Prupe_3G186200	FAR1	2080	2091	+	4.55072	0.000918	0.474	CACACACACTCT
Prupe_3G027400	G2-like	1110	1118	-	12.5135	3.5e-05	0.145	GAGAAAACA
Prupe_5G028400	G2-like	11	25	+	9.72464	0.000185	0.768	AGTATATTATTCTTA
Prupe_3G127700	G2-like	1601	1610	-	9.38655	0.000218	0.914	GAGAATCGAG
Prupe_2G253700	G2-like	665	679	+	10.0469	0.000219	0.744	CTATAAAATTCTAAT
Prupe_6G282300	G2-like	2055	2065	-	9.79688	0.000257	0.466	TGGAGAATGTG
Prupe_6G282300	G2-like	669	679	-	9.71875	0.000267	0.466	ATTAGAATTTT
Prupe_6G282300	G2-like	1475	1485	+	9.3125	0.000335	0.466	CGAAGAATGTG
Prupe_3G027400	G2-like	859	867	-	8.16216	0.000401	0.546	CTGAAGACA
Prupe_2G253700	G2-like	2051	2065	+	8.90625	0.000419	0.744	CAAACACATTCTCCA
Prupe_3G127700	G2-like	2054	2063	-	8.09244	0.000525	1	GAGAATGTGT
Prupe_3G027400	G2-like	881	889	-	6.83784	0.000527	0.546	GGGAAGACT
Prupe_3G027400	G2-like	1490	1498	+	6.37838	0.000587	0.546	TAGGAAACC
Prupe_6G282300	G2-like	16	26	-	8.04688	0.000632	0.658	ATAAGAATAAT
Prupe_5G023700	G2-like	13	26	-	6.57812	0.000634	1	ATAAGAATAATATA
Prupe_2G253700	G2-like	12	26	+	7.96875	0.000634	0.744	GTATATTATTCTTAT
Prupe_5G028400	G2-like	8	22	+	5.78261	0.000695	1	GTGAGTATATTATTC
Prupe_5G023700	G2-like	256	269	+	6.26562	0.000696	1	TGTAGCATATTAGG
Prupe_3G127700	G2-like	1707	1716	-	7.45378	0.000736	1	CAGTTTCTGG
Prupe_4G000700	G2-like	256	268	+	4.54688	0.000747	1	TGTAGCATATTAG
Prupe_3G027400	G2-like	865	873	+	2.44595	0.00078	0.546	CAGGAGACT
Prupe_3G027400	G2-like	1044	1052	-	2.12162	0.00079	0.546	GCGGAGACA
Prupe_4G000700	G2-like	8	20	+	4.26562	0.000802	1	GTGAGTATATTAT
Prupe_6G282300	G2-like	518	528	-	7.39062	0.000829	0.691	CAAAGAATTAA
Prupe_2G253700	G2-like	514	528	+	7.09375	0.000868	0.744	GTTTTTAATTCTTTG
Prupe_7G235900	G2-like	11	21	+	5.17188	0.00089	1	AGTATATTATT
Prupe_2G253700	G2-like	1475	1489	-	7	0.000894	0.744	AATCCACATTCTTCG
Prupe_7G001700	G2-like	348	361	+	5.21875	0.000897	1	GATCGAATCATAAT
Prupe_7G138100	G2-like	349	359	-	6.94737	0.00092	1	TATGATTCGAT
Prupe_7G001700	G2-like	13	26	-	5.04688	0.000933	1	ATAAGAATAATATA
Prupe_5G028400	G2-like	1674	1688	-	4.56522	0.000964	1	TTCCAATTATACCTT
Prupe_7G001700	G2-like	256	269	+	4.76562	0.000995	1	TGTAGCATATTAGG
Prupe_3G019800	GATA	1609	1627	+	3.28378	7.53e-05	0.219	TCCCATCCCCGATATCATC
Prupe_3G019800	GATA	15	33	+	0.972973	0.000157	0.219	TATTATTCTTATCTCCATC
Prupe_3G019800	GATA	1188	1206	-	0.891892	0.000161	0.219	CATGCCCATCAAAACCACC
Prupe_3G019800	GATA	1612	1630	+	-0.0135135	0.000212	0.219	CATCCCCGATATCATCCCT
Prupe_1G126000	GATA	15	33	+	1.86957	0.000366	1	TATTATTCTTATCTCCATC
Prupe_3G019800	GATA	700	718	-	-2.86486	0.00048	0.314	CATTGTCGTCAAAATATTA
Prupe_3G019800	GATA	87	105	+	-3.56757	0.000582	0.314	AATCTCCGACTTCATCAGA
Prupe_3G019800	GATA	1185	1203	-	-3.75676	0.000612	0.314	GCCCATCAAAACCACCACA
Prupe_3G019800	GATA	703	721	-	-3.87838	0.000632	0.314	TCTCATTGTCGTCAAAATA
Prupe_1G126000	GATA	1062	1080	-	0.231884	0.000633	1	CATGACCTCCTTTGACAAC
Prupe_1G534300	GATA	852	866	-	1.98438	0.000668	1	TGAAGACAGTTGGTT
Prupe_3G019800	GATA	1062	1080	-	-4.17568	0.000685	0.314	CATGACCTCCTTTGACAAC
Prupe_3G019800	GATA	328	346	+	-4.90541	0.000829	0.319	AACCGTCTTTACCAGCAAG
Prupe_3G019800	GATA	18	36	+	-5	0.00085	0.319	TATTCTTATCTCCATCCCT
Prupe_2G135400	GATA	343	357	+	5.375	0.00093	1	CAAGGGATCGAATCA
Prupe_2G135400	GATA	1480	1494	-	5.25	0.000969	1	TCCTAAATCCACATT
Prupe_1G534300	GATA	560	574	-	0.6875	0.000986	1	ATTAGACTGTTCGAT
Prupe_3G019800	GATA	1162	1180	+	-5.60811	0.000993	0.342	CGTGCTCAACGACACAAGC
Prupe_1G271400	HD-ZIP	1784	1794	-	11.5147	7.05e-05	0.278	CTAATAATTAG
Prupe_7G149700	HD-ZIP	1777	1797	-	10.8923	7.43e-05	0.307	AAACTAATAATTAGTCACACA
Prupe_7G121100	HD-ZIP	489	501	-	9.92424	0.000122	0.387	TTGAATTATTTAC
Prupe_1G271400	HD-ZIP	600	610	-	10.9118	0.000133	0.278	TTAATAATTTG
Prupe_3G283200	HD-ZIP	490	500	+	10.7206	0.000144	0.395	TAAATAATTCA
Prupe_3G060700	HD-ZIP	1784	1798	-	9.01515	0.000164	0.65	AAAACTAATAATTAG
Prupe_3G283200	HD-ZIP	1784	1794	-	10.1765	0.000189	0.395	CTAATAATTAG
Prupe_7G149700	HD-ZIP	593	613	-	8.69231	0.000213	0.402	TAATTAATAATTTGGGTCGAT
Prupe_5G240900	HD-ZIP	1838	1848	+	8.60938	0.000254	0.962	GCATTTAAAGG
Prupe_1G271400	HD-ZIP	490	500	+	9.94118	0.00026	0.362	TAAATAATTCA
Prupe_3G283200	HD-ZIP	600	610	-	9.20588	0.000287	0.4	TTAATAATTTG
Prupe_7G149700	HD-ZIP	1781	1801	+	7.92308	0.000292	0.402	TGACTAATTATTAGTTTTTAG
Prupe_7G121100	HD-ZIP	1783	1795	+	7.37879	0.000349	0.387	ACTAATTATTAGT
Prupe_3G060700	HD-ZIP	717	731	+	6.86364	0.000367	0.65	TGAGACAATTATGAT
Prupe_7G121100	HD-ZIP	599	611	+	7.10606	0.000385	0.387	CCAAATTATTAAT
Prupe_7G121100	HD-ZIP	1736	1748	-	7.01515	0.000397	0.387	AAGCATTATTTGT
Prupe_2G156900	HD-ZIP	604	614	+	7.12308	0.000454	1	TTATTAATTAG
Prupe_7G121100	HD-ZIP	695	707	-	6.54545	0.000464	0.387	AAATATTATTGTT
Prupe_3G283200	HD-ZIP	696	706	+	7.29412	0.0005	0.415	ACAATAATATT
Prupe_3G283200	HD-ZIP	1737	1747	+	7.27941	0.0005	0.415	CAAATAATGCT
Prupe_3G060700	HD-ZIP	1780	1794	+	5.57576	0.000547	0.65	GTGACTAATTATTAG
Prupe_2G194400	HD-ZIP	1784	1796	+	5.86154	0.000573	0.816	CTAATTATTAGTT
Prupe_6G193400	HD-ZIP	697	707	+	8.73529	0.000576	0.926	CAATAATATTT
Prupe_5G240900	HD-ZIP	1339	1349	+	6.10938	0.000578	0.962	ACATTAAACAT
Prupe_7G149700	HD-ZIP	693	713	+	5.96923	0.00058	0.556	TAAACAATAATATTTTGACGA
Prupe_6G193400	HD-ZIP	599	609	-	8.69118	0.00059	0.926	TAATAATTTGG
Prupe_1G271400	HD-ZIP	696	706	+	8.13235	0.000604	0.509	ACAATAATATT
Prupe_3G060700	HD-ZIP	208	222	+	5.10606	0.000624	0.65	AAAAATAATAATAAG
Prupe_2G194400	HD-ZIP	488	500	-	5.61538	0.000626	0.816	TGAATTATTTACT
Prupe_3G283200	HD-ZIP	357	367	+	6.47059	0.000637	0.415	ATAATAATATA
Prupe_2G194400	HD-ZIP	600	612	+	5.53846	0.000642	0.816	CAAATTATTAATT
Prupe_6G213800	HD-ZIP	726	735	-	6.62162	0.000643	1	GCAAATCATA
Prupe_7G121100	HD-ZIP	1652	1664	+	5.31818	0.000683	0.45	TTGGATTATTAGC
Prupe_6G193400	HD-ZIP	1783	1793	-	8.44118	0.000692	0.926	TAATAATTAGT
Prupe_1G271400	HD-ZIP	212	222	+	7.61765	0.000717	0.509	ATAATAATAAG
Prupe_1G271400	HD-ZIP	357	367	+	7.58824	0.00073	0.509	ATAATAATATA
Prupe_7G149700	HD-ZIP	209	229	+	5.15385	0.00074	0.556	AAAATAATAATAAGAACAGCT
Prupe_3G283200	HD-ZIP	209	219	+	5.77941	0.000776	0.415	AAAATAATAAT
Prupe_3G283200	HD-ZIP	212	222	+	5.63235	0.000795	0.415	ATAATAATAAG
Prupe_7G149700	HD-ZIP	718	738	+	4.84615	0.000807	0.556	GAGACAATTATGATTTGCAAG
Prupe_2G194400	HD-ZIP	1461	1473	+	4.8	0.000819	0.816	TTTTTTATTGAAT
Prupe_7G121100	HD-ZIP	365	377	-	4.56061	0.000855	0.45	CTCCATTGTTTAT
Prupe_5G240900	HD-ZIP	1838	1848	-	4.75	0.000856	0.962	CCTTTAAATGC
Prupe_7G121100	HD-ZIP	1399	1411	+	4.51515	0.000866	0.45	CGGACTTATTGCT
Prupe_6G193400	HD-ZIP	722	732	+	7.91176	0.000887	0.926	CAATTATGATT
Prupe_1G271400	HD-ZIP	1737	1747	+	6.79412	0.000893	0.533	CAAATAATGCT
Prupe_3G283200	HD-ZIP	600	610	+	5.14706	0.000903	0.419	CAAATTATTAA
Prupe_5G240900	HD-ZIP	1022	1032	+	4.51562	0.000921	0.962	ACATCAAATAC
Prupe_2G156900	HD-ZIP	1022	1032	+	4.83077	0.000938	1	ACATCAAATAC
Prupe_2G156900	HD-ZIP	514	524	-	4.8	0.000945	1	GAATTAAAAAC
Prupe_2G156900	HD-ZIP	1838	1848	+	4.70769	0.000958	1	GCATTTAAAGG
Prupe_7G121100	HD-ZIP	208	220	-	4.10606	0.000972	0.45	TATTATTATTTTT
Prupe_2G194400	HD-ZIP	694	706	-	4.26154	0.000979	0.816	AATATTATTGTTT
Prupe_7G231100	HSF	1265	1275	-	16.0469	3.46e-06	0.0144	CTAGAAAGTTC
Prupe_8G234900	HSF	1264	1278	+	11.2969	3.67e-05	0.0917	GGAACTTTCTAGCTA
Prupe_4G144200	HSF	1265	1276	+	11.5	3.82e-05	0.158	GAACTTTCTAGC
Prupe_8G234900	HSF	862	876	-	10.9062	4.46e-05	0.0917	AGAAGTCTCCTGAAG
Prupe_2G292100	HSF	1265	1276	+	10.7188	5.96e-05	0.249	GAACTTTCTAGC
Prupe_5G093200	HSF	1264	1277	-	8.70312	6.41e-05	0.264	AGCTAGAAAGTTCC
Prupe_4G068100	HSF	1696	1714	+	9.10938	8.98e-05	0.193	CAATACAACTTCCAGAAAC
Prupe_4G068100	HSF	1703	1721	-	9.03125	9.3e-05	0.193	TAACTCAGTTTCTGGAAGT
Prupe_5G093200	HSF	863	876	+	6.48438	0.000143	0.294	TTCAGGAGACTTCT
Prupe_4G144200	HSF	864	875	-	8.48438	0.000152	0.231	GAAGTCTCCTGA
Prupe_1G433500	HSF	862	876	-	4.14865	0.000165	0.337	AGAAGTCTCCTGAAG
Prupe_4G144200	HSF	1476	1487	+	8.25	0.000167	0.231	GAAGAATGTGGA
Prupe_7G231100	HSF	1476	1486	-	5.04688	0.000228	0.477	CCACATTCTTC
Prupe_8G234900	HSF	1475	1489	+	7.17188	0.000231	0.316	CGAAGAATGTGGATT
Prupe_1G433500	HSF	1873	1887	+	2.89189	0.000236	0.337	TGAAAATTGAAGAAC
Prupe_1G433500	HSF	1475	1489	+	2.7027	0.000249	0.337	CGAAGAATGTGGATT
Prupe_4G068100	HSF	861	879	-	6.51562	0.000274	0.378	GGCAGAAGTCTCCTGAAGA
Prupe_7G056700	HSF	1704	1718	+	7.675	0.000312	0.491	CTTCCAGAAACTGAG
Prupe_2G292100	HSF	864	875	-	7.14062	0.000313	0.652	GAAGTCTCCTGA
Prupe_7G056700	HSF	1699	1713	-	7.6	0.000323	0.491	TTTCTGGAAGTTGTA
Prupe_1G433500	HSF	1598	1612	-	1.7027	0.000328	0.337	GGGAGAATCGAGTAC
Prupe_4G068100	HSF	937	955	-	5.53125	0.000404	0.42	TGGAAAAGTCTCTTGAAAC
Prupe_5G093200	HSF	1475	1488	-	3.17188	0.000416	0.572	ATCCACATTCTTCG
Prupe_1G433500	HSF	1264	1278	+	0.675676	0.000432	0.355	GGAACTTTCTAGCTA
Prupe_7G231100	HSF	1306	1316	+	2.40625	0.000442	0.614	CCACAACCTAC
Prupe_7G056700	HSF	233	247	-	6.8875	0.000443	0.491	CTTCTCGGTTGTGCC
Prupe_7G056700	HSF	1598	1612	+	6.75	0.000471	0.491	GTACTCGATTCTCCC
Prupe_8G234900	HSF	1873	1887	+	5.0625	0.000514	0.435	TGAAAATTGAAGAAC
Prupe_8G234900	HSF	1598	1612	-	4.70312	0.000584	0.435	GGGAGAATCGAGTAC
Prupe_8G234900	HSF	874	888	-	4.46875	0.000634	0.435	GGAAGACTCGGCAGA
Prupe_7G231100	HSF	382	392	+	0.453125	0.000687	0.716	CCACAGATTTC
Prupe_7G056700	HSF	1264	1278	-	5.8125	0.000698	0.581	TAGCTAGAAAGTTCC
Prupe_4G144200	HSF	1874	1885	+	4.32812	0.000701	0.725	GAAAATTGAAGA
Prupe_5G093200	HSF	1873	1886	-	1.125	0.000756	0.664	TTCTTCAATTTTCA
Prupe_5G093200	HSF	1599	1612	+	0.75	0.000839	0.664	TACTCGATTCTCCC
Prupe_7G056700	HSF	1790	1804	-	5.3125	0.000853	0.592	GGTCTAAAAACTAAT
Prupe_4G144200	HSF	946	957	+	3.5625	0.000901	0.746	GACTTTTCCAGC
Prupe_7G231100	HSF	665	675	+	-0.65625	0.00091	0.76	CTATAAAATTC
Prupe_5G093200	HSF	939	952	+	0.234375	0.000967	0.664	TTCAAGAGACTTTT
Prupe_3G126300	LBD	186	200	+	11.375	5.18e-05	0.177	CCGTCCATAACGGTG
Prupe_6G365600	LBD	324	344	+	8.20312	7.39e-05	0.303	CATCAACCGTCTTTACCAGCA
Prupe_3G126300	LBD	90	104	-	10.5312	8.52e-05	0.177	CTGATGAAGTCGGAG
Prupe_8G227500	LBD	1474	1488	+	9.54688	0.000128	0.535	GCGAAGAATGTGGAT
Prupe_2G146600	LBD	1474	1492	-	9.14062	0.000158	0.458	CTAAATCCACATTCTTCGC
Prupe_3G126300	LBD	184	198	-	9.1875	0.000177	0.192	CCGTTATGGACGGAA
Prupe_3G126300	LBD	1474	1488	+	8.70312	0.000227	0.192	GCGAAGAATGTGGAT
Prupe_2G146600	LBD	382	400	-	8.45312	0.000227	0.458	ACTCGGGCGAAATCTGTGG
Prupe_3G126300	LBD	1615	1629	-	8.67188	0.000231	0.192	GGGATGATATCGGGG
Prupe_6G365600	LBD	86	106	+	4.92188	0.000289	0.41	CAATCTCCGACTTCATCAGAG
Prupe_3G126300	LBD	1104	1118	-	8.09375	0.000307	0.213	GAGAAAACATCGCAC
Prupe_5G167800	LBD	326	346	+	3.92188	0.000329	0.51	TCAACCGTCTTTACCAGCAAG
Prupe_2G146600	LBD	1227	1245	+	7.5	0.000368	0.458	TTTGTGGCACCAATTCAGG
Prupe_8G227500	LBD	1038	1052	-	7.53125	0.00038	0.688	GCGGAGACACAGTCA
Prupe_5G167800	LBD	182	202	+	3.35938	0.000408	0.51	TGTTCCGTCCATAACGGTGCC
Prupe_6G365600	LBD	1997	2017	-	3.875	0.000432	0.41	ATGTGACCTTCTCACCCACCG
Prupe_2G146600	LBD	1034	1052	+	7.125	0.000442	0.458	TTAATGACTGTGTCTCCGC
Prupe_3G126300	LBD	583	597	-	7.28125	0.00045	0.268	TCGATGATGTAGCAA
Prupe_5G167800	LBD	1470	1490	-	2.89062	0.000487	0.51	AAATCCACATTCTTCGCATTC
Prupe_8G227500	LBD	1231	1245	-	7	0.000496	0.688	CCTGAATTGGTGCCA
Prupe_5G167800	LBD	1995	2015	-	2.84375	0.000496	0.51	GTGACCTTCTCACCCACCGGA
Prupe_6G365600	LBD	184	204	-	3.5	0.000497	0.41	GTGGCACCGTTATGGACGGAA
Prupe_6G365600	LBD	1472	1492	-	3.48438	0.000499	0.41	CTAAATCCACATTCTTCGCAT
Prupe_6G365600	LBD	180	200	+	2.51562	0.000711	0.471	GTTGTTCCGTCCATAACGGTG
Prupe_2G146600	LBD	1216	1234	+	5.96875	0.000759	0.629	CCTCCCGCTGATTTGTGGC
Prupe_6G365600	LBD	872	892	+	2.17188	0.000804	0.471	CTTCTGCCGAGTCTTCCCTCC
Prupe_8G227500	LBD	876	890	-	5.75	0.000902	0.939	AGGGAAGACTCGGCA
Prupe_3G126300	LBD	1170	1184	+	5.51562	0.000972	0.506	ACGACACAAGCGATG
Prupe_5G167800	LBD	182	202	-	0.953125	0.000983	0.808	GGCACCGTTATGGACGGAACA
Prupe_5G140700	LFY	1959	1977	+	0.942029	0.000864	1	GCCCACCCTCCAGTCAAAC
Prupe_5G140700	LFY	1959	1977	-	0.942029	0.000864	1	GTTTGACTGGAGGGTGGGC
Prupe_2G151200	MIKC_MADS	137	157	-	17.6029	2.84e-07	0.00114	TTTTACTCTTTTTTTTTTTCT
Prupe_2G151200	MIKC_MADS	735	755	-	17.0294	5.76e-07	0.00116	TTTTGCCTTTTGTCTTTCTTG
Prupe_2G151200	MIKC_MADS	131	151	-	16.6471	8.87e-07	0.00119	TCTTTTTTTTTTTCTTTCCAT
Prupe_2G151200	MIKC_MADS	135	155	-	15.5882	2.58e-06	0.00259	TTACTCTTTTTTTTTTTCTTT
Prupe_2G151200	MIKC_MADS	905	925	-	15.3235	3.29e-06	0.00264	TTCTATTTTCTTTCGTTCTTG
Prupe_2G023100	MIKC_MADS	121	139	+	13.625	8.99e-06	0.0373	CCTTCTCATTATGGAAAGA
Prupe_1G290600	MIKC_MADS	971	982	+	12.95	1.45e-05	0.0603	CCTAAAGGGGAA
Prupe_3G170600	MIKC_MADS	121	138	-	12.65	2.26e-05	0.0937	CTTTCCATAATGAGAAGG
Prupe_2G023100	MIKC_MADS	120	138	-	11.3438	2.92e-05	0.0606	CTTTCCATAATGAGAAGGT
Prupe_6G199000	MIKC_MADS	125	139	-	10.8125	4.76e-05	0.198	TCTTTCCATAATGAG
Prupe_1G371300	MIKC_MADS	969	983	+	10.9565	6.55e-05	0.273	CACCTAAAGGGGAAT
Prupe_2G151200	MIKC_MADS	129	149	-	10.7647	7.74e-05	0.048	TTTTTTTTTTTCTTTCCATAA
Prupe_2G151200	MIKC_MADS	1111	1131	+	10.6176	8.37e-05	0.048	GTTTTCTCTGTTTGGTCTTGT
Prupe_1G489400	MIKC_MADS	1453	1466	-	10.375	8.8e-05	0.175	AAAAAAAGGGCAAA
Prupe_2G151000	MIKC_MADS	119	137	-	8.5	9.5e-05	0.229	TTTCCATAATGAGAAGGTC
Prupe_1G489400	MIKC_MADS	914	927	+	10.0625	0.000105	0.175	AAGAAAATAGAAAA
Prupe_2G151000	MIKC_MADS	122	140	+	8.125	0.000111	0.229	CTTCTCATTATGGAAAGAA
Prupe_2G151200	MIKC_MADS	916	936	-	10.0735	0.000111	0.0547	TGTTTATGATTTTCTATTTTC
Prupe_6G199000	MIKC_MADS	971	985	-	8.70312	0.000122	0.254	GAATTCCCCTTTAGG
Prupe_2G151200	MIKC_MADS	750	770	-	9.86765	0.000122	0.0547	TTTCCACTTCACTGTTTTTGC
Prupe_1G489400	MIKC_MADS	758	771	+	9.67188	0.00013	0.175	AGTGAAGTGGAAAA
Prupe_1G223600	MIKC_MADS	1113	1125	-	9.97101	0.000153	0.356	CCAAACAGAGAAA
Prupe_2G151200	MIKC_MADS	734	754	-	9.39706	0.000153	0.0576	TTTGCCTTTTGTCTTTCTTGC
Prupe_4G070500	MIKC_MADS	119	137	+	9.62319	0.000154	0.458	GACCTTCTCATTATGGAAA
Prupe_2G151200	MIKC_MADS	130	150	-	9.33824	0.000158	0.0576	CTTTTTTTTTTTCTTTCCATA
Prupe_1G371300	MIKC_MADS	123	137	+	9.21739	0.000169	0.308	TTCTCATTATGGAAA
Prupe_1G223600	MIKC_MADS	970	982	+	9.81159	0.000171	0.356	ACCTAAAGGGGAA
Prupe_1G290600	MIKC_MADS	1772	1783	+	9.45833	0.000186	0.361	CCAAATGTGTGA
Prupe_1G489400	MIKC_MADS	971	984	+	8.67188	0.000218	0.221	CCTAAAGGGGAATT
Prupe_2G151200	MIKC_MADS	898	918	-	8.60294	0.000219	0.0733	TTCTTTCGTTCTTGGATTTGG
Prupe_1G371300	MIKC_MADS	122	136	-	8.66667	0.000222	0.308	TTCCATAATGAGAAG
Prupe_6G199000	MIKC_MADS	120	134	+	7.04688	0.000234	0.325	ACCTTCTCATTATGG
Prupe_3G170600	MIKC_MADS	1232	1249	-	8.975	0.000241	0.501	TGGGCCTGAATTGGTGCC
Prupe_1G290600	MIKC_MADS	123	134	-	8.89167	0.000259	0.361	CCATAATGAGAA
Prupe_1G489400	MIKC_MADS	143	156	+	8.125	0.000285	0.227	AAAAAAAGAGTAAA
Prupe_2G151200	MIKC_MADS	1629	1649	-	7.75	0.000312	0.0964	TCTGTGTTTTATTTTCTGTAG
Prupe_1G223600	MIKC_MADS	971	983	+	8.65217	0.000331	0.39	CCTAAAGGGGAAT
Prupe_1G489400	MIKC_MADS	741	754	+	7.78125	0.000335	0.227	AGACAAAAGGCAAA
Prupe_4G070500	MIKC_MADS	122	140	-	8.17391	0.000338	0.458	TTCTTTCCATAATGAGAAG
Prupe_4G070500	MIKC_MADS	1110	1128	+	8.05797	0.000359	0.458	TGTTTTCTCTGTTTGGTCT
Prupe_1G223600	MIKC_MADS	125	137	+	8.42029	0.000374	0.39	CTCATTATGGAAA
Prupe_3G170600	MIKC_MADS	967	984	+	8.0625	0.000393	0.527	AGCACCTAAAGGGGAATT
Prupe_4G070500	MIKC_MADS	968	986	-	7.63768	0.000444	0.458	AGAATTCCCCTTTAGGTGC
Prupe_1G371300	MIKC_MADS	1113	1127	-	7.05797	0.000466	0.485	GACCAAACAGAGAAA
Prupe_3G170600	MIKC_MADS	1112	1129	-	7.5	0.000523	0.527	AAGACCAAACAGAGAAAA
Prupe_6G199000	MIKC_MADS	970	984	-	4.75	0.000523	0.544	AATTCCCCTTTAGGT
Prupe_2G023100	MIKC_MADS	966	984	-	3.96875	0.000525	0.631	AATTCCCCTTTAGGTGCTT
Prupe_2G151200	MIKC_MADS	915	935	-	6.14706	0.000563	0.151	GTTTATGATTTTCTATTTTCT
Prupe_1G489400	MIKC_MADS	1452	1465	-	6.60938	0.000572	0.287	AAAAAAGGGCAAAA
Prupe_2G151200	MIKC_MADS	1867	1887	-	5.95588	0.000601	0.151	GTTCTTCAATTTTCAATTTCA
Prupe_2G023100	MIKC_MADS	1112	1130	+	3.5	0.000609	0.631	TTTTCTCTGTTTGGTCTTG
Prupe_2G151200	MIKC_MADS	133	153	-	5.85294	0.000622	0.151	ACTCTTTTTTTTTTTCTTTCC
Prupe_1G489400	MIKC_MADS	137	150	+	6.40625	0.000625	0.287	AGAAAAAAAAAAAG
Prupe_2G151200	MIKC_MADS	148	168	-	5.77941	0.000637	0.151	CGTCTGTCATATTTTACTCTT
Prupe_1G489400	MIKC_MADS	1356	1369	+	6.35938	0.000637	0.287	GTCAAAGAAGCAAT
Prupe_1G223600	MIKC_MADS	162	174	+	7.36232	0.000647	0.533	ACAGACGAGGAAA
Prupe_3G170600	MIKC_MADS	2088	2105	-	7.025	0.000658	0.527	CTTACCAACTAGAGAGAG
Prupe_4G070500	MIKC_MADS	159	177	-	6.62319	0.000719	0.553	TAATTTCCTCGTCTGTCAT
Prupe_2G151200	MIKC_MADS	1347	1367	-	5.22059	0.000762	0.17	TGCTTCTTTGACTTTTCCATG
Prupe_3G170600	MIKC_MADS	335	352	+	6.7125	0.000763	0.527	TTTACCAGCAAGGGATCG
Prupe_1G223600	MIKC_MADS	122	134	-	6.98551	0.000768	0.533	CCATAATGAGAAG
Prupe_4G070500	MIKC_MADS	776	794	-	6.37681	0.000804	0.553	TCTTTGTTACTTTCGTCCA
Prupe_2G151200	MIKC_MADS	1032	1052	+	5.01471	0.000812	0.172	CGTTAATGACTGTGTCTCCGC
Prupe_6G199000	MIKC_MADS	1241	1255	+	3.25	0.000833	0.694	TCAGGCCCATTGTGG
Prupe_1G290600	MIKC_MADS	1677	1688	+	6.78333	0.000857	0.893	GTATAATTGGAA
Prupe_1G223600	MIKC_MADS	1558	1570	+	6.65217	0.000894	0.533	GTTTAAATGGATA
Prupe_2G023100	MIKC_MADS	157	175	-	2.0625	0.000941	0.781	ATTTCCTCGTCTGTCATAT
Prupe_1G371300	MIKC_MADS	1243	1257	-	5.30435	0.000953	0.793	ATCCACAATGGGCCT
Prupe_6G303900	M-type_MADS	989	994	+	12.3375	0.00019	0.795	TGGTGA
Prupe_1G313300	MYB	1849	1863	+	14.8594	2.68e-06	0.0111	GCTATAGTTAGGCAC
Prupe_6G303300	MYB	1993	2007	-	14.8594	4.16e-06	0.017	CTCACCCACCGGACT
Prupe_8G270000	MYB	1150	1159	-	15.7053	4.83e-06	0.0201	TTACCTACCA
Prupe_1G111700	MYB	1847	1861	+	14.1094	5.35e-06	0.0221	GGGCTATAGTTAGGC
Prupe_1G551400	MYB	1150	1160	+	14.4632	8.95e-06	0.0373	TGGTAGGTAAA
Prupe_3G299000	MYB	1148	1160	-	13.8841	1.53e-05	0.0631	TTTACCTACCAGT
Prupe_6G349400	MYB	226	236	+	12.825	1.68e-05	0.0682	AGCTCAGGGCA
Prupe_5G193200	MYB	1993	2011	+	12.9062	2.07e-05	0.0842	AGTCCGGTGGGTGAGAAGG
Prupe_2G164300	MYB	1146	1160	+	12.9219	2.13e-05	0.0866	TTACTGGTAGGTAAA
Prupe_5G217700	MYB	16	30	+	12.7812	2.31e-05	0.0963	ATTATTCTTATCTCC
Prupe_7G018400	MYB	1993	2011	-	12.6406	2.47e-05	0.101	CCTTCTCACCCACCGGACT
Prupe_1G039200	MYB	1298	1318	+	12.4375	2.52e-05	0.0649	CTCAAAAACCACAACCTACTT
Prupe_5G240000	MYB	193	203	-	13.1622	2.6e-05	0.109	TGGCACCGTTA
Prupe_3G249600	MYB	1148	1161	+	12.6875	2.82e-05	0.0727	ACTGGTAGGTAAAA
Prupe_1G349700	MYB	533	545	-	12.6875	2.99e-05	0.0835	GTAATGGATAAGT
Prupe_1G039200	MYB	1183	1203	-	12.0781	3.23e-05	0.0649	GCCCATCAAAACCACCACACA
Prupe_3G249600	MYB	1852	1865	+	12.4531	3.5e-05	0.0727	ATAGTTAGGCACAT
Prupe_8G164300	MYB	1146	1160	+	12.2344	3.94e-05	0.163	TTACTGGTAGGTAAA
Prupe_6G303300	MYB	1146	1160	-	12.2031	3.98e-05	0.0813	TTTACCTACCAGTAA
Prupe_1G349700	MYB	21	33	-	12.2344	4e-05	0.0835	GATGGAGATAAGA
Prupe_1G125300	MYB	1150	1159	+	11.9429	4.41e-05	0.144	TGGTAGGTAA
Prupe_6G188300	MYB	1143	1163	+	11.8125	4.51e-05	0.184	TGCTTACTGGTAGGTAAAACG
Prupe_2G164300	MYB	1001	1015	-	11.6406	4.64e-05	0.0944	AGCTTGTTAGGTTGG
Prupe_4G126900	MYB	1140	1160	+	11.5156	5.5e-05	0.127	CTTTGCTTACTGGTAGGTAAA
Prupe_1G313300	MYB	1002	1016	-	11.8125	5.79e-05	0.12	AAGCTTGTTAGGTTG
Prupe_1G417400	MYB	454	466	-	2.5375	6.13e-05	0.178	GGAGGGTTAGTTG
Prupe_3G299000	MYB	2093	2105	-	11.6087	6.62e-05	0.137	CTTACCAACTAGA
Prupe_4G126900	MYB	1987	2007	+	11	7.14e-05	0.127	ATGAGAAGTCCGGTGGGTGAG
Prupe_6G267600	MYB	184	202	-	11.4459	7.31e-05	0.294	GGCACCGTTATGGACGGAA
Prupe_7G126800	MYB	1850	1864	+	8.14062	7.52e-05	0.312	CTATAGTTAGGCACA
Prupe_1G039200	MYB	1150	1170	-	10.5938	8.27e-05	0.111	TTGAGCACGTTTTACCTACCA
Prupe_1G430000	MYB	327	345	-	10	8.35e-05	0.286	TTGCTGGTAAAGACGGTTG
Prupe_6G271600	MYB	1246	1266	+	10.2125	8.54e-05	0.354	CCCATTGTGGATGAGAAAGGA
Prupe_5G217700	MYB	1252	1266	-	10.9844	8.9e-05	0.185	TCCTTTCTCATCCAC
Prupe_4G126900	MYB	452	472	-	10.4219	9.38e-05	0.127	AACACAGGAGGGTTAGTTGCA
Prupe_6G303300	MYB	452	466	+	10.7812	9.53e-05	0.13	TGCAACTAACCCTCC
Prupe_1G125300	MYB	453	462	-	10.6381	9.78e-05	0.144	GGTTAGTTGC
Prupe_2G012800	MYB	1182	1192	+	10.6094	9.96e-05	0.176	ATGTGTGGTGG
Prupe_3G249600	MYB	1000	1013	-	11	0.000101	0.139	CTTGTTAGGTTGGT
Prupe_6G229000	MYB	327	337	+	11.2812	0.000101	0.35	CAACCGTCTTT
Prupe_1G125300	MYB	1002	1011	-	10.5048	0.000104	0.144	TGTTAGGTTG
Prupe_8G164300	MYB	2091	2105	+	11.125	0.000106	0.219	TCTCTAGTTGGTAAG
Prupe_3G268000	MYB	1209	1223	+	9.90625	0.000119	0.183	ACCTCAACCTCCCGC
Prupe_2G164300	MYB	1993	2007	+	9.8125	0.000119	0.161	AGTCCGGTGGGTGAG
Prupe_5G193200	MYB	448	466	-	9.5625	0.000123	0.2	GGAGGGTTAGTTGCAAGCT
Prupe_7G018400	MYB	448	466	+	9.51562	0.000127	0.194	AGCTTGCAACTAACCCTCC
Prupe_1G551400	MYB	1001	1011	-	10.0632	0.000127	0.265	TGTTAGGTTGG
Prupe_8G270000	MYB	1997	2006	-	9.36842	0.000128	0.25	TCACCCACCG
Prupe_1G349700	MYB	1249	1261	+	9.98438	0.000132	0.184	ATTGTGGATGAGA
Prupe_6G032800	MYB	1147	1161	+	10.3594	0.000137	0.306	TACTGGTAGGTAAAA
Prupe_1G039200	MYB	840	860	+	9.70312	0.000138	0.131	AGGTACCAAATCAACCAACTG
Prupe_1G430000	MYB	1186	1204	+	8.85938	0.00014	0.286	GTGGTGGTTTTGATGGGCA
Prupe_1G313300	MYB	1512	1526	+	10.4219	0.00014	0.193	GGGGAACTTAGGCTC
Prupe_4G136300	MYB	945	965	+	8.20312	0.000142	0.204	AGACTTTTCCAGCTAACCCAA
Prupe_7G018400	MYB	845	863	+	9.25	0.000143	0.194	CCAAATCAACCAACTGTCT
Prupe_6G032800	MYB	525	539	-	10.2188	0.000149	0.306	GATAAGTAGTTCAAA
Prupe_1G417400	MYB	323	335	-	-1.15	0.00015	0.178	AGACGGTTGATGT
Prupe_6G188300	MYB	994	1014	-	9.92188	0.000152	0.229	GCTTGTTAGGTTGGTCTAATT
Prupe_3G268000	MYB	851	865	+	9.4375	0.000154	0.183	CAACCAACTGTCTTC
Prupe_1G417400	MYB	1994	2006	+	-1.45	0.000159	0.178	GTCCGGTGGGTGA
Prupe_1G039200	MYB	991	1011	+	9.40625	0.000162	0.131	GTGAATTAGACCAACCTAACA
Prupe_2G012800	MYB	2026	2036	-	9.75	0.000163	0.176	GATGTTGGTTC
Prupe_7G126800	MYB	1001	1015	-	4.45312	0.000164	0.339	AGCTTGTTAGGTTGG
Prupe_1G125300	MYB	798	807	+	9.68571	0.000165	0.163	AGGCAGGTAG
Prupe_2G012800	MYB	851	861	-	9.71875	0.000167	0.176	ACAGTTGGTTG
Prupe_6G229000	MYB	1055	1065	-	10.6719	0.000168	0.35	CAACTGTAATA
Prupe_5G193200	MYB	845	863	-	8.82812	0.00017	0.2	AGACAGTTGGTTGATTTGG
Prupe_2G012800	MYB	1213	1223	-	9.65625	0.000172	0.176	GCGGGAGGTTG
Prupe_4G136300	MYB	1147	1167	-	7.70312	0.000173	0.204	AGCACGTTTTACCTACCAGTA
Prupe_1G417400	MYB	851	863	-	-1.8375	0.000173	0.178	AGACAGTTGGTTG
Prupe_2G164300	MYB	2091	2105	+	8.8125	0.000185	0.185	TCTCTAGTTGGTAAG
Prupe_6G303300	MYB	2091	2105	-	9.3125	0.000196	0.2	CTTACCAACTAGAGA
Prupe_5G193200	MYB	1956	1974	-	8.48438	0.000197	0.2	TGACTGGAGGGTGGGCATG
Prupe_1G125300	MYB	1309	1318	-	9.35238	0.000197	0.163	AAGTAGGTTG
Prupe_4G126900	MYB	1001	1021	-	8.59375	0.000201	0.204	AATGTAAGCTTGTTAGGTTGG
Prupe_3G268000	MYB	1995	2009	-	8.89062	0.000208	0.183	TTCTCACCCACCGGA
Prupe_4G136300	MYB	1994	2014	-	7.17188	0.000211	0.204	TGACCTTCTCACCCACCGGAC
Prupe_3G299000	MYB	850	862	+	8.34783	0.000215	0.24	TCAACCAACTGTC
Prupe_3G249600	MYB	996	1009	-	9.67188	0.000216	0.224	TTAGGTTGGTCTAA
Prupe_2G012800	MYB	984	994	+	9.21875	0.000218	0.178	TCTTTTGGTGA
Prupe_6G255400	MYB	2021	2035	-	7.65625	0.000227	0.613	ATGTTGGTTCCGTTG
Prupe_3G299000	MYB	1001	1013	+	8.13043	0.000232	0.24	CCAACCTAACAAG
Prupe_3G268000	MYB	450	464	+	8.67188	0.000233	0.183	CTTGCAACTAACCCT
Prupe_6G349400	MYB	1744	1754	+	7.8625	0.000233	0.474	TGCTTAGGGGC
Prupe_6G188300	MYB	949	969	-	8.98438	0.000253	0.229	GCTTTTGGGTTAGCTGGAAAA
Prupe_4G136300	MYB	445	465	+	6.64062	0.000255	0.204	ATTAGCTTGCAACTAACCCTC
Prupe_1G111700	MYB	1004	1018	-	9.46875	0.000256	0.418	GTAAGCTTGTTAGGT
Prupe_6G059700	MYB	191	201	-	8.5625	0.000257	1	GCACCGTTATG
Prupe_8G164300	MYB	981	995	+	9.57812	0.00026	0.324	AATTCTTTTGGTGAA
Prupe_3G268000	MYB	1958	1972	+	8.39062	0.000269	0.183	TGCCCACCCTCCAGT
Prupe_3G268000	MYB	1185	1199	-	8.375	0.000271	0.183	ATCAAAACCACCACA
Prupe_5G193200	MYB	1146	1164	+	7.67188	0.000273	0.222	TTACTGGTAGGTAAAACGT
Prupe_4G136300	MYB	2092	2112	-	6.40625	0.000277	0.204	GGAACTTCTTACCAACTAGAG
Prupe_3G216600	MYB	322	336	+	9.20312	0.000278	0.785	CACATCAACCGTCTT
Prupe_1G452000	MYB	2020	2034	-	7.90625	0.000282	1	TGTTGGTTCCGTTGT
Prupe_4G126900	MYB	841	861	-	7.57812	0.000291	0.236	ACAGTTGGTTGATTTGGTACC
Prupe_1G551400	MYB	997	1007	-	8.13684	0.000294	0.303	AGGTTGGTCTA
Prupe_8G270000	MYB	2095	2104	-	7.63158	0.000294	0.25	TTACCAACTA
Prupe_6G032800	MYB	451	465	-	8.92188	0.000294	0.326	GAGGGTTAGTTGCAA
Prupe_6G255400	MYB	1413	1427	-	6.79688	0.000294	0.613	ATATTTTTGCCGCTA
Prupe_1G430000	MYB	2021	2039	-	7.03125	0.000297	0.354	TGTGATGTTGGTTCCGTTG
Prupe_2G164300	MYB	997	1011	-	7.57812	0.000301	0.185	TGTTAGGTTGGTCTA
Prupe_4G136300	MYB	887	907	+	6.15625	0.000302	0.204	CCCTCCAGACCCCAAATCCAA
Prupe_1G039200	MYB	1202	1222	+	8.20312	0.000304	0.194	GCATGGAACCTCAACCTCCCG
Prupe_1G111700	MYB	844	858	-	9.04688	0.000307	0.418	GTTGGTTGATTTGGT
Prupe_7G126800	MYB	1667	1681	+	1.5	0.00031	0.429	GTGAAATAAGGTATA
Prupe_6G188300	MYB	523	543	-	8.57812	0.000311	0.229	AATGGATAAGTAGTTCAAAGA
Prupe_6G267600	MYB	318	336	-	8.45946	0.000319	0.641	AAGACGGTTGATGTGACTA
Prupe_8G164300	MYB	1001	1015	-	9.125	0.000319	0.324	AGCTTGTTAGGTTGG
Prupe_3G249600	MYB	1307	1320	-	8.8125	0.000323	0.268	ATAAGTAGGTTGTG
Prupe_8G270000	MYB	998	1007	+	7.41053	0.000323	0.25	AGACCAACCT
Prupe_6G188300	MYB	838	858	-	8.48438	0.000325	0.229	GTTGGTTGATTTGGTACCTCG
Prupe_5G240000	MYB	2021	2031	-	8.18919	0.000329	0.526	TGGTTCCGTTG
Prupe_1G276300	MYB	1053	1065	+	7.175	0.000337	0.613	TTTATTACAGTTG
Prupe_2G070600	MYB	532	541	-	9.07368	0.000338	1	TGGATAAGTA
Prupe_1G039200	MYB	48	68	+	7.98438	0.000338	0.194	TACCCCAATTCCCACCTTCGT
Prupe_1G125300	MYB	842	851	-	8.25714	0.000342	0.211	GATTTGGTAC
Prupe_6G188300	MYB	1990	2010	+	8.375	0.000343	0.229	AGAAGTCCGGTGGGTGAGAAG
Prupe_1G430000	MYB	328	346	-	6.64062	0.000345	0.354	CTTGCTGGTAAAGACGGTT
Prupe_2G164300	MYB	452	466	-	7.1875	0.000346	0.185	GGAGGGTTAGTTGCA
Prupe_4G136300	MYB	834	854	+	5.71875	0.000351	0.204	CGCACGAGGTACCAAATCAAC
Prupe_1G125300	MYB	953	962	-	8.13333	0.000356	0.211	GGTTAGCTGG
Prupe_1G276300	MYB	327	339	-	6.975	0.000359	0.613	GTAAAGACGGTTG
Prupe_2G164300	MYB	850	864	-	7.07812	0.000359	0.185	AAGACAGTTGGTTGA
Prupe_1G551400	MYB	1308	1318	-	7.63158	0.000361	0.303	AAGTAGGTTGT
Prupe_8G270000	MYB	798	807	-	7.16842	0.000362	0.25	CTACCTGCCT
Prupe_2G164300	MYB	1308	1322	-	7.04688	0.000363	0.185	TCATAAGTAGGTTGT
Prupe_4G126900	MYB	975	995	+	6.875	0.000368	0.249	AAGGGGAATTCTTTTGGTGAA
Prupe_6G271600	MYB	1558	1578	+	6.5375	0.00037	0.601	GTTTAAATGGATAAAAGTATT
Prupe_6G032800	MYB	1000	1014	-	8.39062	0.000374	0.326	GCTTGTTAGGTTGGT
Prupe_6G229000	MYB	855	865	+	9.15625	0.000375	0.519	CAACTGTCTTC
Prupe_3G216600	MYB	2021	2035	+	8.67188	0.000382	0.785	CAACGGAACCAACAT
Prupe_3G299000	MYB	983	995	-	6.62319	0.000383	0.312	TTCACCAAAAGAA
Prupe_1G039200	MYB	2015	2035	+	7.70312	0.000388	0.195	CATGGACAACGGAACCAACAT
Prupe_5G240000	MYB	327	337	-	7.56757	0.000391	0.526	AAAGACGGTTG
Prupe_6G188300	MYB	449	469	-	8.09375	0.000392	0.229	ACAGGAGGGTTAGTTGCAAGC
Prupe_1G349700	MYB	1561	1573	+	7.17188	0.000395	0.413	TAAATGGATAAAA
Prupe_7G018400	MYB	321	339	+	6.60938	0.000399	0.407	TCACATCAACCGTCTTTAC
Prupe_1G111700	MYB	1112	1126	+	8.3125	0.000406	0.418	TTTTCTCTGTTTGGT
Prupe_2G012800	MYB	1996	2006	+	8.04688	0.00041	0.276	CCGGTGGGTGA
Prupe_8G270000	MYB	1309	1318	+	6.84211	0.000411	0.25	CAACCTACTT
Prupe_3G268000	MYB	1299	1313	+	7.51562	0.000414	0.24	TCAAAAACCACAACC
Prupe_1G417400	MYB	1974	1986	-	-6.0875	0.00042	0.236	ACAAGGAAGGTTT
Prupe_8G270000	MYB	1974	1983	+	6.8	0.00042	0.25	AAACCTTCCT
Prupe_6G271600	MYB	16	36	-	6.05	0.000435	0.601	AGGGATGGAGATAAGAATAAT
Prupe_2G164300	MYB	1183	1197	+	6.48438	0.00044	0.199	TGTGTGGTGGTTTTG
Prupe_1G276300	MYB	928	940	+	6.2375	0.00044	0.613	TCATAAACAGTTT
Prupe_6G032800	MYB	996	1010	-	7.98438	0.000443	0.326	GTTAGGTTGGTCTAA
Prupe_1G039200	MYB	985	1005	-	7.40625	0.000447	0.2	GTTGGTCTAATTCACCAAAAG
Prupe_5G193200	MYB	1207	1225	-	6.3125	0.000449	0.304	CAGCGGGAGGTTGAGGTTC
Prupe_3G299000	MYB	841	853	+	6.08696	0.000453	0.312	GGTACCAAATCAA
Prupe_6G303300	MYB	849	863	+	7.03125	0.000457	0.324	ATCAACCAACTGTCT
Prupe_4G136300	MYB	795	815	-	4.79688	0.000472	0.24	CAGTCAGTCTACCTGCCTATA
Prupe_2G012800	MYB	453	463	-	7.78125	0.000473	0.276	GGGTTAGTTGC
Prupe_6G032800	MYB	1307	1321	-	7.79688	0.000478	0.326	CATAAGTAGGTTGTG
Prupe_6G188300	MYB	978	998	+	7.625	0.000486	0.229	GGGAATTCTTTTGGTGAATTA
Prupe_4G126900	MYB	2085	2105	+	5.96875	0.000488	0.283	ACACTCTCTCTAGTTGGTAAG
Prupe_5G240000	MYB	237	247	-	6.08108	0.000503	0.526	CTTCTCGGTTG
Prupe_1G430000	MYB	1159	1177	-	5.60938	0.000506	0.411	TGTGTCGTTGAGCACGTTT
Prupe_6G059700	MYB	659	669	-	6.85938	0.00051	1	TATAGGTTATG
Prupe_5G172400	MYB	655	669	+	6.39062	0.000514	1	ATAGCATAACCTATA
Prupe_6G303300	MYB	794	808	-	6.60938	0.000521	0.324	TCTACCTGCCTATAT
Prupe_1G417400	MYB	1180	1192	+	-7.0125	0.000521	0.236	CGATGTGTGGTGG
Prupe_2G070600	MYB	20	29	-	8.21053	0.000524	1	GAGATAAGAA
Prupe_1G551400	MYB	798	808	+	6.63158	0.000525	0.303	AGGCAGGTAGA
Prupe_8G164300	MYB	1308	1322	-	7.90625	0.000529	0.324	TCATAAGTAGGTTGT
Prupe_1G551400	MYB	399	409	-	6.61053	0.00053	0.303	TGATAGGTCAC
Prupe_6G188300	MYB	1185	1205	+	7.42188	0.000532	0.229	TGTGGTGGTTTTGATGGGCAT
Prupe_1G551400	MYB	2095	2105	+	6.58947	0.000533	0.303	TAGTTGGTAAG
Prupe_3G299000	MYB	1308	1320	+	5.47826	0.000543	0.321	ACAACCTACTTAT
Prupe_7G126800	MYB	1308	1322	-	-0.8125	0.000544	0.564	TCATAAGTAGGTTGT
Prupe_1G417400	MYB	1213	1225	-	-7.225	0.000551	0.236	CAGCGGGAGGTTG
Prupe_6G303300	MYB	1732	1746	+	6.39062	0.000556	0.324	TGCAACAAATAATGC
Prupe_6G229000	MYB	2021	2031	+	8.07812	0.000582	0.578	CAACGGAACCA
Prupe_1G551400	MYB	967	977	-	6.31579	0.000582	0.303	CTTTAGGTGCT
Prupe_5G217700	MYB	528	542	+	7.5	0.000586	0.814	GAACTACTTATCCAT
Prupe_1G417400	MYB	1607	1619	-	-7.5875	0.000596	0.236	CGGGGATGGGAGA
Prupe_3G249600	MYB	840	853	-	7.1875	0.000601	0.376	TTGATTTGGTACCT
Prupe_3G163100	MYB	854	864	-	8.25	0.000601	1	AAGACAGTTGG
Prupe_1G039200	MYB	942	962	+	6.71875	0.000613	0.246	AAGAGACTTTTCCAGCTAACC
Prupe_8G164300	MYB	997	1011	-	7.5	0.000621	0.324	TGTTAGGTTGGTCTA
Prupe_6G271600	MYB	2052	2072	-	4.8875	0.000627	0.65	GAGAGAGTGGAGAATGTGTTT
Prupe_1G417400	MYB	1961	1973	-	-7.875	0.000633	0.236	GACTGGAGGGTGG
Prupe_6G267600	MYB	2012	2030	-	6.09459	0.000634	0.665	GGTTCCGTTGTCCATGTGA
Prupe_8G164300	MYB	841	855	-	7.40625	0.000644	0.324	GGTTGATTTGGTACC
Prupe_3G249600	MYB	2093	2106	+	6.9375	0.000651	0.376	TCTAGTTGGTAAGA
Prupe_8G164300	MYB	850	864	-	7.375	0.000652	0.324	AAGACAGTTGGTTGA
Prupe_2G012800	MYB	2045	2055	-	7.09375	0.000652	0.3	GTTTGTGTTGA
Prupe_1G452000	MYB	192	206	-	4.48438	0.00066	1	AAGTGGCACCGTTAT
Prupe_5G193200	MYB	849	867	-	5.09375	0.000668	0.369	CTGAAGACAGTTGGTTGAT
Prupe_1G417400	MYB	2079	2091	-	-8.1125	0.00067	0.236	AGAGTGTGTGTGC
Prupe_7G018400	MYB	1246	1264	-	4.96875	0.000677	0.531	CTTTCTCATCCACAATGGG
Prupe_4G126900	MYB	322	342	-	4.76562	0.000684	0.31	CTGGTAAAGACGGTTGATGTG
Prupe_1G417400	MYB	1209	1221	-	-8.225	0.000686	0.236	GGGAGGTTGAGGT
Prupe_1G430000	MYB	184	202	-	4.73438	0.00069	0.411	GGCACCGTTATGGACGGAA
Prupe_6G229000	MYB	507	517	-	7.60938	0.000696	0.578	AAACTGTATTT
Prupe_3G268000	MYB	1991	2005	-	6.375	0.000697	0.327	CACCCACCGGACTTC
Prupe_6G188300	MYB	624	644	+	6.78125	0.000697	0.229	AGTTTGAGTGTAGTTCGAAGA
Prupe_1G430000	MYB	745	763	-	4.6875	0.000702	0.411	TTCACTGTTTTTGCCTTTT
Prupe_6G349400	MYB	1164	1174	+	5.4	0.000702	0.951	TGCTCAACGAC
Prupe_4G126900	MYB	1732	1752	-	4.65625	0.000704	0.31	CCCTAAGCATTATTTGTTGCA
Prupe_8G164300	MYB	794	808	+	7.17188	0.000704	0.324	ATATAGGCAGGTAGA
Prupe_3G249600	MYB	1117	1130	+	6.59375	0.000723	0.376	TCTGTTTGGTCTTG
Prupe_6G032800	MYB	2092	2106	+	6.67188	0.000725	0.424	CTCTAGTTGGTAAGA
Prupe_3G268000	MYB	323	337	+	6.28125	0.000726	0.327	ACATCAACCGTCTTT
Prupe_6G188300	MYB	2021	2041	-	6.65625	0.000733	0.229	TGTGTGATGTTGGTTCCGTTG
Prupe_1G039200	MYB	1895	1915	-	6.3125	0.000734	0.246	TTCAAACAGTGCCAGCTACAA
Prupe_8G270000	MYB	1002	1011	+	5.33684	0.000742	0.38	CAACCTAACA
Prupe_4G136300	MYB	982	1002	-	3.28125	0.000743	0.321	GGTCTAATTCACCAAAAGAAT
Prupe_6G188300	MYB	2022	2042	-	6.5625	0.000762	0.229	TTGTGTGATGTTGGTTCCGTT
Prupe_1G125300	MYB	998	1007	-	6.45714	0.000781	0.372	AGGTTGGTCT
Prupe_6G188300	MYB	998	1018	-	6.5	0.000781	0.229	GTAAGCTTGTTAGGTTGGTCT
Prupe_1G417400	MYB	1002	1014	-	-8.8875	0.000793	0.236	GCTTGTTAGGTTG
Prupe_4G136300	MYB	1990	2010	-	3.04688	0.000794	0.321	CTTCTCACCCACCGGACTTCT
Prupe_3G163100	MYB	2020	2030	-	7.59375	0.000798	1	GGTTCCGTTGT
Prupe_2G164300	MYB	526	540	-	4.5	0.000799	0.325	GGATAAGTAGTTCAA
Prupe_2G012800	MYB	1124	1134	+	6.64062	0.000799	0.3	GGTCTTGTTGA
Prupe_3G163100	MYB	453	463	-	7.57812	0.000804	1	GGGTTAGTTGC
Prupe_2G012800	MYB	2094	2104	+	6.625	0.000805	0.3	CTAGTTGGTAA
Prupe_1G039200	MYB	822	842	-	6.09375	0.000808	0.246	CCTCGTGCGTGTCAACTACGC
Prupe_1G125300	MYB	2095	2104	+	6.4	0.000808	0.372	TAGTTGGTAA
Prupe_3G299000	MYB	1181	1193	-	3.98551	0.000809	0.386	ACCACCACACATC
Prupe_8G270000	MYB	378	387	+	5.06316	0.000821	0.38	TTACCCACAG
Prupe_6G271600	MYB	758	778	+	3.975	0.000823	0.682	AGTGAAGTGGAAAAGATTTGG
Prupe_1G551400	MYB	1997	2007	+	5.26316	0.000824	0.377	CGGTGGGTGAG
Prupe_4G126900	MYB	850	870	-	4.01562	0.000829	0.31	CTCCTGAAGACAGTTGGTTGA
Prupe_6G188300	MYB	1680	1700	+	6.34375	0.00083	0.229	TAATTGGAAGTGGTTCCAATA
Prupe_1G430000	MYB	1924	1942	+	4.17188	0.000836	0.429	AGGACGGGTAGGGTTGTAG
Prupe_1G417400	MYB	1221	1233	+	-9.175	0.000839	0.236	CGCTGATTTGTGG
Prupe_6G188300	MYB	2088	2108	+	6.3125	0.00084	0.229	CTCTCTCTAGTTGGTAAGAAG
Prupe_1G417400	MYB	1990	2002	+	-9.1875	0.000843	0.236	AGAAGTCCGGTGG
Prupe_6G303300	MYB	841	855	+	4.8125	0.000843	0.407	GGTACCAAATCAACC
Prupe_2G012800	MYB	1309	1319	-	6.5	0.000844	0.3	TAAGTAGGTTG
Prupe_5G193200	MYB	321	339	-	4.3125	0.000845	0.369	GTAAAGACGGTTGATGTGA
Prupe_7G126800	MYB	1493	1507	-	-2.76562	0.000853	0.6	AATTTATTTGGTTTC
Prupe_1G313300	MYB	1309	1323	-	5.53125	0.000855	0.822	GTCATAAGTAGGTTG
Prupe_1G039200	MYB	1963	1983	+	5.95312	0.000858	0.246	ACCCTCCAGTCAAACCTTCCT
Prupe_1G417400	MYB	1957	1969	-	-9.2875	0.000863	0.236	GGAGGGTGGGCAT
Prupe_1G111700	MYB	1143	1157	+	5.54688	0.000867	0.453	TGCTTACTGGTAGGT
Prupe_1G111700	MYB	1311	1325	-	5.54688	0.000867	0.453	CAGTCATAAGTAGGT
Prupe_7G126800	MYB	605	619	+	-2.84375	0.000867	0.6	TATTAATTAGATGAA
Prupe_1G039200	MYB	2061	2081	+	5.92188	0.000869	0.246	CTCCACTCTCTCTAACACGCA
Prupe_1G452000	MYB	1023	1037	+	2.78125	0.000871	1	CATCAAATACGTTAA
Prupe_2G012800	MYB	953	963	-	6.40625	0.000882	0.3	GGGTTAGCTGG
Prupe_1G111700	MYB	504	518	-	5.45312	0.000886	0.453	AAAACTGTATTTGGT
Prupe_7G018400	MYB	849	867	+	4	0.000896	0.531	ATCAACCAACTGTCTTCAG
Prupe_6G303300	MYB	680	694	-	4.54688	0.000898	0.407	TATAACAACTTGTTA
Prupe_5G193200	MYB	1303	1321	-	4.09375	0.0009	0.369	CATAAGTAGGTTGTGGTTT
Prupe_1G125300	MYB	1854	1863	+	6.13333	0.000902	0.374	AGTTAGGCAC
Prupe_1G551400	MYB	841	851	-	4.98947	0.000906	0.377	GATTTGGTACC
Prupe_4G126900	MYB	414	434	+	3.64062	0.000908	0.31	TACATAGTTTTGTTTGATGCA
Prupe_3G268000	MYB	1305	1319	+	5.75	0.000909	0.369	ACCACAACCTACTTA
Prupe_7G018400	MYB	1146	1164	-	3.9375	0.000912	0.531	ACGTTTTACCTACCAGTAA
Prupe_4G126900	MYB	377	397	-	3.60938	0.000915	0.31	CGGGCGAAATCTGTGGGTAAC
Prupe_1G111700	MYB	1000	1014	-	5.29688	0.000917	0.453	GCTTGTTAGGTTGGT
Prupe_4G136300	MYB	990	1010	+	2.51562	0.000919	0.321	GGTGAATTAGACCAACCTAAC
Prupe_1G276300	MYB	750	762	+	3.25	0.000928	0.968	GCAAAAACAGTGA
Prupe_6G267600	MYB	1056	1074	+	4.21622	0.000928	0.665	ATTACAGTTGTCAAAGGAG
Prupe_3G299000	MYB	452	464	+	3.4058	0.000929	0.386	TGCAACTAACCCT
Prupe_3G299000	MYB	1852	1864	-	3.3913	0.000932	0.386	TGTGCCTAACTAT
Prupe_6G267600	MYB	508	526	+	4.17568	0.000935	0.665	AATACAGTTTTTAATTCTT
Prupe_1G039200	MYB	831	851	+	5.75	0.000935	0.246	ACACGCACGAGGTACCAAATC
Prupe_4G136300	MYB	392	412	+	2.40625	0.000946	0.321	CGCCCGAGTGACCTATCAACA
Prupe_5G193200	MYB	2091	2109	+	3.84375	0.000966	0.369	TCTCTAGTTGGTAAGAAGT
Prupe_1G039200	MYB	884	904	+	5.64062	0.000979	0.246	CTTCCCTCCAGACCCCAAATC
Prupe_1G111700	MYB	1496	1510	-	4.9375	0.00099	0.453	AATAATTTATTTGGT
Prupe_1G313300	MYB	842	856	-	4.92188	0.000991	0.822	TGGTTGATTTGGTAC
Prupe_6G349400	MYB	874	884	-	4.5375	0.000991	1	GACTCGGCAGA
Prupe_6G267600	MYB	931	949	+	3.83784	0.000992	0.665	TAAACAGTTTCAAGAGACT
Prupe_5G217700	MYB	764	778	-	6.20312	0.000993	1	CCAAATCTTTTCCAC
Prupe_5G172400	MYB	187	201	+	3.79688	0.000996	1	CGTCCATAACGGTGC
Prupe_5G193200	MYB	794	812	+	3.71875	0.001	0.369	ATATAGGCAGGTAGACTGA
Prupe_8G146200	MYB_related	1002	1010	-	13.3478	2.72e-05	0.113	GTTAGGTTG
Prupe_5G064900	MYB_related	529	543	+	12.7188	2.77e-05	0.102	AACTACTTATCCATT
Prupe_2G271900	MYB_related	531	545	-	12.4844	3.03e-05	0.126	GTAATGGATAAGTAG
Prupe_7G212300	MYB_related	531	545	+	11.7344	4.62e-05	0.192	CTACTTATCCATTAC
Prupe_5G064900	MYB_related	1563	1577	-	11.9062	4.9e-05	0.102	ATACTTTTATCCATT
Prupe_3G045300	MYB_related	1929	1938	-	11.1263	5.1e-05	0.135	AACCCTACCC
Prupe_5G182000	MYB_related	534	541	-	12.6105	6.09e-05	0.256	TGGATAAG
Prupe_3G045300	MYB_related	1761	1770	-	10.9789	6.51e-05	0.135	TACCCTAAAC
Prupe_2G271900	MYB_related	1561	1575	+	11.4062	6.57e-05	0.137	TAAATGGATAAAAGT
Prupe_1G262700	MYB_related	533	542	-	11.5053	8.15e-05	0.319	ATGGATAAGT
Prupe_7G212300	MYB_related	1561	1575	-	10.2969	0.000106	0.198	ACTTTTATCCATTTA
Prupe_2G271900	MYB_related	1249	1263	+	10.2812	0.000131	0.182	ATTGTGGATGAGAAA
Prupe_7G212300	MYB_related	1249	1263	-	9.71875	0.000143	0.198	TTTCTCATCCACAAT
Prupe_1G262700	MYB_related	1564	1573	+	10.8421	0.000152	0.319	ATGGATAAAA
Prupe_6G219800	MYB_related	1408	1415	-	7.37143	0.000195	0.622	CTAGAGCA
Prupe_7G212300	MYB_related	761	775	-	8.95312	0.000207	0.216	AATCTTTTCCACTTC
Prupe_5G064900	MYB_related	1251	1265	-	9.125	0.000228	0.317	CCTTTCTCATCCACA
Prupe_6G219800	MYB_related	229	236	+	5.84762	0.000299	0.622	TCAGGGCA
Prupe_3G045300	MYB_related	227	236	-	9.42105	0.000314	0.434	TGCCCTGAGC
Prupe_8G146200	MYB_related	435	443	-	8.08696	0.000336	0.424	TGTAGGGTG
Prupe_8G146200	MYB_related	1309	1317	-	7.75362	0.000346	0.424	AGTAGGTTG
Prupe_2G271900	MYB_related	19	33	-	8.0625	0.000399	0.416	GATGGAGATAAGAAT
Prupe_5G182000	MYB_related	1565	1572	+	8.82105	0.000411	0.862	TGGATAAA
Prupe_7G212300	MYB_related	19	33	+	7.1875	0.000452	0.376	ATTCTTATCTCCATC
Prupe_8G146200	MYB_related	1930	1938	+	5.33333	0.000517	0.424	GGTAGGGTT
Prupe_3G045300	MYB_related	1002	1011	+	8.57895	0.000544	0.479	CAACCTAACA
Prupe_8G146200	MYB_related	264	272	+	0.869565	0.000585	0.424	ATTAGGACG
Prupe_3G045300	MYB_related	435	444	+	8.37895	0.000594	0.479	CACCCTACAA
Prupe_6G219800	MYB_related	1763	1770	+	4.55238	0.000608	0.843	TTAGGGTA
Prupe_8G146200	MYB_related	595	603	-	0.637681	0.000613	0.424	TTTGGGTCG
Prupe_3G045300	MYB_related	400	409	+	8.08421	0.000694	0.479	TGACCTATCA
Prupe_5G241000	MYB_related	282	293	-	-0.9375	0.000757	1	TAAAATATTTAA
Prupe_6G219800	MYB_related	392	399	-	1.4	0.000869	0.904	CTCGGGCG
Prupe_5G064900	MYB_related	17	31	+	5.6875	0.00088	0.916	TTATTCTTATCTCCA
Prupe_5G241000	MYB_related	282	293	+	-1.57812	0.000889	1	TTAAATATTTTA
Prupe_8G146200	MYB_related	1762	1770	+	-0.405797	0.000912	0.54	TTTAGGGTA
Prupe_1G262700	MYB_related	2016	2025	+	4.23158	0.00093	0.82	ATGGACAACG
Prupe_1G262700	MYB_related	1252	1261	+	4.12632	0.000949	0.82	GTGGATGAGA
Prupe_1G262700	MYB_related	764	773	+	3.98947	0.000979	0.82	GTGGAAAAGA
Prupe_7G212300	MYB_related	2055	2069	+	5.14062	0.000992	0.689	CACATTCTCCACTCT
Prupe_5G006200	NAC	819	836	-	15.9844	2.39e-06	0.00992	GCGTGTCAACTACGCAAC
Prupe_3G014400	NAC	1979	1994	-	15.1719	5.09e-06	0.0212	CTTCTCATACAAGGAA
Prupe_2G196600	NAC	820	836	+	14.7969	5.48e-06	0.0228	TTGCGTAGTTGACACGC
Prupe_4G187100	NAC	1978	1994	-	12.9688	8.79e-06	0.0366	CTTCTCATACAAGGAAG
Prupe_4G175800	NAC	817	835	-	14	9.21e-06	0.0382	CGTGTCAACTACGCAACTT
Prupe_5G076100	NAC	823	837	+	14.1406	9.78e-06	0.0239	CGTAGTTGACACGCA
Prupe_5G076100	NAC	821	835	-	13.9375	1.15e-05	0.0239	CGTGTCAACTACGCA
Prupe_1G454900	NAC	820	837	+	13.4062	1.31e-05	0.0544	TTGCGTAGTTGACACGCA
Prupe_1G220400	NAC	820	838	-	13.1719	1.38e-05	0.0437	GTGCGTGTCAACTACGCAA
Prupe_4G138500	NAC	820	836	+	12.6875	1.48e-05	0.0601	TTGCGTAGTTGACACGC
Prupe_5G241300	NAC	821	837	+	13.3125	1.56e-05	0.0418	TGCGTAGTTGACACGCA
Prupe_5G221600	NAC	820	835	-	13.1406	1.59e-05	0.0647	CGTGTCAACTACGCAA
Prupe_5G241300	NAC	821	837	-	12.8438	2.01e-05	0.0418	TGCGTGTCAACTACGCA
Prupe_1G220400	NAC	820	838	+	12.375	2.1e-05	0.0437	TTGCGTAGTTGACACGCAC
Prupe_8G045800	NAC	817	835	+	10.0156	2.24e-05	0.0484	AAGTTGCGTAGTTGACACG
Prupe_8G045800	NAC	1976	1994	+	9.875	2.34e-05	0.0484	ACCTTCCTTGTATGAGAAG
Prupe_5G040400	NAC	1980	1994	+	12.875	2.36e-05	0.0985	TCCTTGTATGAGAAG
Prupe_1G587100	NAC	817	835	-	12.625	2.47e-05	0.102	CGTGTCAACTACGCAACTT
Prupe_5G221600	NAC	1979	1994	-	11.8594	3.11e-05	0.0647	CTTCTCATACAAGGAA
Prupe_1G454900	NAC	1979	1996	+	11.8125	3.47e-05	0.0719	TTCCTTGTATGAGAAGTC
Prupe_5G241300	NAC	1980	1996	+	11.4688	4.01e-05	0.0451	TCCTTGTATGAGAAGTC
Prupe_5G241300	NAC	1980	1996	-	11.2969	4.34e-05	0.0451	GACTTCTCATACAAGGA
Prupe_4G040900	NAC	819	826	-	12.6105	4.75e-05	0.199	TACGCAAC
Prupe_4G053300	NAC	1980	1994	-	11.6406	4.96e-05	0.207	CTTCTCATACAAGGA
Prupe_3G014400	NAC	820	835	-	11.2031	5.37e-05	0.112	CGTGTCAACTACGCAA
Prupe_4G138500	NAC	1209	1225	-	8.6375	6.28e-05	0.127	CAGCGGGAGGTTGAGGT
Prupe_4G187100	NAC	819	835	-	6.89062	6.43e-05	0.134	CGTGTCAACTACGCAAC
Prupe_8G058100	NAC	1200	1211	+	10.9259	6.86e-05	0.178	GGGCATGGAACC
Prupe_5G006200	NAC	1978	1995	-	9.54688	7.13e-05	0.148	ACTTCTCATACAAGGAAG
Prupe_8G058100	NAC	111	122	-	10.6	8.53e-05	0.178	GGTCAAGGAACC
Prupe_6G138100	NAC	1978	1996	+	9.96875	8.63e-05	0.354	CTTCCTTGTATGAGAAGTC
Prupe_7G001200	NAC	817	831	+	11.0156	8.91e-05	0.371	AAGTTGCGTAGTTGA
Prupe_7G001400	NAC	820	838	-	7.53125	9.34e-05	0.387	GTGCGTGTCAACTACGCAA
Prupe_1G493100	NAC	816	837	-	10.625	9.75e-05	0.375	TGCGTGTCAACTACGCAACTTT
Prupe_7G217000	NAC	1982	1996	-	9.89062	9.91e-05	0.413	GACTTCTCATACAAG
Prupe_7G166300	NAC	1982	1994	-	10.9531	0.000117	0.25	CTTCTCATACAAG
Prupe_8G035500	NAC	1979	1999	-	5.6875	0.000123	0.508	CCGGACTTCTCATACAAGGAA
Prupe_8G035400	NAC	1979	1999	-	5.6875	0.000123	0.508	CCGGACTTCTCATACAAGGAA
Prupe_2G091300	NAC	1978	1997	+	7.67568	0.000124	0.216	CTTCCTTGTATGAGAAGTCC
Prupe_7G166300	NAC	823	835	-	10.75	0.000133	0.25	CGTGTCAACTACG
Prupe_5G006200	NAC	822	839	+	7.875	0.00014	0.194	GCGTAGTTGACACGCACG
Prupe_8G002500	NAC	820	840	-	7.79688	0.000143	0.591	TCGTGCGTGTCAACTACGCAA
Prupe_2G091300	NAC	819	838	+	7.18919	0.000147	0.216	GTTGCGTAGTTGACACGCAC
Prupe_8G058100	NAC	818	829	-	9.75556	0.000148	0.206	AACTACGCAACT
Prupe_4G126800	NAC	1979	1999	+	4.70312	0.000157	0.389	TTCCTTGTATGAGAAGTCCGG
Prupe_2G091300	NAC	1939	1958	+	7.01351	0.000157	0.216	GTAGCTTAAATCCCATGCAT
Prupe_3G178000	NAC	819	838	-	8.07812	0.000157	0.589	GTGCGTGTCAACTACGCAAC
Prupe_4G123700	NAC	820	840	-	7.6875	0.000161	0.665	TCGTGCGTGTCAACTACGCAA
Prupe_4G053300	NAC	1982	1996	+	9.48438	0.000165	0.241	CTTGTATGAGAAGTC
Prupe_1G277500	NAC	817	827	-	10.1562	0.000175	0.73	CTACGCAACTT
Prupe_1G493100	NAC	1413	1434	-	9.67188	0.000181	0.375	AGCGTGTATATTTTTGCCGCTA
Prupe_5G040400	NAC	1982	1996	-	8.70312	0.000184	0.233	GACTTCTCATACAAG
Prupe_4G053300	NAC	821	835	-	9.21875	0.000189	0.241	CGTGTCAACTACGCA
Prupe_8G045800	NAC	334	352	-	1.85938	0.000201	0.278	CGATCCCTTGCTGGTAAAG
Prupe_4G126800	NAC	820	840	+	3.59375	0.000209	0.389	TTGCGTAGTTGACACGCACGA
Prupe_7G166300	NAC	1982	1994	+	9.8125	0.000223	0.25	CTTGTATGAGAAG
Prupe_5G040400	NAC	821	835	+	8.14062	0.000228	0.233	TGCGTAGTTGACACG
Prupe_4G053300	NAC	823	837	+	8.79688	0.000231	0.241	CGTAGTTGACACGCA
Prupe_2G196600	NAC	1979	1995	+	8.125	0.000235	0.488	TTCCTTGTATGAGAAGT
Prupe_2G091500	NAC	1089	1100	+	9.52632	0.000239	0.439	TAGCACGAAAGA
Prupe_7G166300	NAC	823	835	+	9.67188	0.000239	0.25	CGTAGTTGACACG
Prupe_7G001400	NAC	1979	1997	-	4.25	0.000242	0.502	GGACTTCTCATACAAGGAA
Prupe_5G040400	NAC	823	837	-	7.96875	0.000243	0.233	TGCGTGTCAACTACG
Prupe_5G221600	NAC	1982	1997	+	6.65625	0.000248	0.287	CTTGTATGAGAAGTCC
Prupe_1G587100	NAC	1976	1994	-	8.07812	0.000249	0.517	CTTCTCATACAAGGAAGGT
Prupe_3G014400	NAC	1464	1479	-	6.59375	0.000253	0.352	CTTCGCATTCAATAAA
Prupe_4G175800	NAC	823	841	+	6.03125	0.00026	0.405	CGTAGTTGACACGCACGAG
Prupe_5G221600	NAC	823	838	+	6.3125	0.000276	0.287	CGTAGTTGACACGCAC
Prupe_5G040400	NAC	1465	1479	+	7.5625	0.00028	0.233	TTATTGAATGCGAAG
Prupe_1G220400	NAC	1979	1997	+	5.95312	0.000284	0.332	TTCCTTGTATGAGAAGTCC
Prupe_3G178000	NAC	820	839	+	6.5625	0.000288	0.589	TTGCGTAGTTGACACGCACG
Prupe_4G175800	NAC	1982	2000	+	5.65625	0.000293	0.405	CTTGTATGAGAAGTCCGGT
Prupe_2G091500	NAC	1831	1842	+	9.21053	0.000297	0.439	GCACAAGGCATT
Prupe_8G058100	NAC	2019	2030	+	8.58519	0.000304	0.317	GACAACGGAACC
Prupe_7G217000	NAC	821	835	+	6.95312	0.000311	0.601	TGCGTAGTTGACACG
Prupe_4G126800	NAC	818	838	-	1.85938	0.000319	0.389	GTGCGTGTCAACTACGCAACT
Prupe_1G220400	NAC	1979	1997	-	5.57812	0.00032	0.332	GGACTTCTCATACAAGGAA
Prupe_2G091300	NAC	1464	1483	-	4.64865	0.000333	0.345	CATTCTTCGCATTCAATAAA
Prupe_4G126800	NAC	1940	1960	+	1.17188	0.000375	0.389	TAGCTTAAATCCCATGCATGC
Prupe_1G454900	NAC	821	838	-	6.9375	0.000383	0.53	GTGCGTGTCAACTACGCA
Prupe_1G493100	NAC	269	290	+	8.32812	0.000393	0.509	GACGTGAGACTATTTAAATATT
Prupe_6G138100	NAC	1980	1998	-	5.92188	0.000409	0.555	CGGACTTCTCATACAAGGA
Prupe_7G217000	NAC	823	837	-	5.92188	0.000433	0.601	TGCGTGTCAACTACG
Prupe_8G045800	NAC	1467	1485	-	-1.85938	0.000455	0.472	CACATTCTTCGCATTCAAT
Prupe_4G138500	NAC	822	838	-	1.8375	0.000463	0.626	GTGCGTGTCAACTACGC
Prupe_7G166300	NAC	334	346	+	8.125	0.000464	0.387	CTTTACCAGCAAG
Prupe_7G001400	NAC	820	838	+	1.67188	0.00047	0.615	TTGCGTAGTTGACACGCAC
Prupe_2G091500	NAC	1388	1399	-	8.50526	0.000475	0.439	GTACAAGTAACA
Prupe_8G058100	NAC	182	193	-	7.79259	0.000476	0.397	ATGGACGGAACA
Prupe_1G220400	NAC	531	549	+	4.10938	0.000495	0.411	CTACTTATCCATTACTAAT
Prupe_5G076100	NAC	1982	1996	+	6.42188	0.000508	0.503	CTTGTATGAGAAGTC
Prupe_8G002500	NAC	818	838	+	3.90625	0.000516	0.853	AGTTGCGTAGTTGACACGCAC
Prupe_5G076100	NAC	532	546	-	6.375	0.000516	0.503	AGTAATGGATAAGTA
Prupe_5G006200	NAC	1981	1998	+	4.09375	0.000529	0.549	CCTTGTATGAGAAGTCCG
Prupe_2G091300	NAC	1979	1998	-	3	0.000533	0.442	CGGACTTCTCATACAAGGAA
Prupe_1G587100	NAC	1755	1773	+	6.07812	0.000537	0.743	CTCTTTGTTTAGGGTAGCC
Prupe_3G178000	NAC	1206	1225	-	4.78125	0.000552	0.752	CAGCGGGAGGTTGAGGTTCC
Prupe_4G123700	NAC	818	838	+	4.03125	0.000574	0.828	AGTTGCGTAGTTGACACGCAC
Prupe_5G241300	NAC	1465	1481	+	3.21875	0.00059	0.49	TTATTGAATGCGAAGAA
Prupe_7G001400	NAC	1979	1997	+	0.71875	0.000593	0.615	TTCCTTGTATGAGAAGTCC
Prupe_4G123700	NAC	1979	1999	-	3.89062	0.0006	0.828	CCGGACTTCTCATACAAGGAA
Prupe_8G045800	NAC	823	841	-	-3.125	0.000604	0.501	CTCGTGCGTGTCAACTACG
Prupe_5G076100	NAC	1980	1994	-	5.90625	0.000604	0.503	CTTCTCATACAAGGA
Prupe_1G493100	NAC	821	842	+	7.45312	0.000615	0.509	TGCGTAGTTGACACGCACGAGG
Prupe_1G493100	NAC	1030	1051	+	7.45312	0.000615	0.509	TACGTTAATGACTGTGTCTCCG
Prupe_8G002500	NAC	1979	1999	-	3.28125	0.000618	0.853	CCGGACTTCTCATACAAGGAA
Prupe_7G166300	NAC	334	346	-	7.34375	0.000621	0.432	CTTGCTGGTAAAG
Prupe_4G126800	NAC	1977	1997	-	-1.09375	0.000623	0.511	GGACTTCTCATACAAGGAAGG
Prupe_4G187100	NAC	1463	1479	-	-2.42188	0.000629	0.774	CTTCGCATTCAATAAAA
Prupe_2G091500	NAC	732	743	+	8.04211	0.000634	0.439	TTGCAAGAAAGA
Prupe_5G040400	NAC	332	346	+	4.85938	0.000654	0.454	GTCTTTACCAGCAAG
Prupe_7G217000	NAC	332	346	+	4.39062	0.000665	0.693	GTCTTTACCAGCAAG
Prupe_2G091500	NAC	874	885	-	7.93684	0.000677	0.439	AGACTCGGCAGA
Prupe_1G454900	NAC	424	441	-	5.46875	0.000694	0.72	TAGGGTGTGCATCAAACA
Prupe_5G221600	NAC	334	349	+	2.98438	0.000703	0.541	CTTTACCAGCAAGGGA
Prupe_2G091500	NAC	445	456	-	7.84211	0.000715	0.439	TTGCAAGCTAAT
Prupe_8G058100	NAC	1823	1834	-	7.05926	0.000716	0.497	GTGCTAGGAACT
Prupe_6G138100	NAC	118	136	+	4.07812	0.000718	0.555	TGACCTTCTCATTATGGAA
Prupe_2G091300	NAC	723	742	-	1.81081	0.000733	0.506	CTTTCTTGCAAATCATAATT
Prupe_6G138100	NAC	902	920	-	3.9375	0.000747	0.555	TTTTCTTTCGTTCTTGGAT
Prupe_5G221600	NAC	1464	1479	-	2.5625	0.00078	0.541	CTTCGCATTCAATAAA
Prupe_8G035500	NAC	447	467	-	-0.828125	0.000784	0.788	AGGAGGGTTAGTTGCAAGCTA
Prupe_8G035400	NAC	447	467	-	-0.828125	0.000784	0.788	AGGAGGGTTAGTTGCAAGCTA
Prupe_6G138100	NAC	894	912	-	3.76562	0.000784	0.555	CGTTCTTGGATTTGGGGTC
Prupe_2G091500	NAC	1977	1988	-	7.64211	0.000804	0.439	ATACAAGGAAGG
Prupe_6G138100	NAC	332	350	-	3.64062	0.000811	0.555	ATCCCTTGCTGGTAAAGAC
Prupe_8G035500	NAC	1940	1960	-	-1.01562	0.000821	0.788	GCATGCATGGGATTTAAGCTA
Prupe_8G035400	NAC	1940	1960	-	-1.01562	0.000821	0.788	GCATGCATGGGATTTAAGCTA
Prupe_8G035500	NAC	423	443	-	-1.0625	0.000831	0.788	TGTAGGGTGTGCATCAAACAA
Prupe_8G035400	NAC	423	443	-	-1.0625	0.000831	0.788	TGTAGGGTGTGCATCAAACAA
Prupe_4G126800	NAC	1462	1482	-	-2.46875	0.000834	0.511	ATTCTTCGCATTCAATAAAAA
Prupe_2G091500	NAC	829	840	+	7.54737	0.000848	0.439	TGACACGCACGA
Prupe_4G138500	NAC	877	893	-	-0.4	0.000859	0.871	TGGAGGGAAGACTCGGC
Prupe_4G126800	NAC	423	443	+	-2.64062	0.000865	0.511	TTGTTTGATGCACACCCTACA
Prupe_4G053300	NAC	534	548	+	5.64062	0.000873	0.727	CTTATCCATTACTAA
Prupe_5G241300	NAC	532	548	-	1.375	0.000873	0.605	TTAGTAATGGATAAGTA
Prupe_1G587100	NAC	823	841	+	4.60938	0.000884	0.917	CGTAGTTGACACGCACGAG
Prupe_4G187100	NAC	446	462	-	-4.0625	0.000888	0.774	GGTTAGTTGCAAGCTAA
Prupe_5G076100	NAC	204	218	+	4.67188	0.000888	0.617	CTTAAAAAATAATAA
Prupe_1G454900	NAC	1980	1997	-	4.78125	0.000901	0.748	GGACTTCTCATACAAGGA
Prupe_1G220400	NAC	1464	1482	-	1.8125	0.000908	0.628	ATTCTTCGCATTCAATAAA
Prupe_8G045800	NAC	1725	1743	-	-5.1875	0.000909	0.548	TTATTTGTTGCATTCCAAT
Prupe_8G045800	NAC	469	487	+	-5.28125	0.000925	0.548	TGTTGACTTGGATTATATG
Prupe_4G187100	NAC	471	487	-	-4.29688	0.000931	0.774	CATATAATCCAAGTCAA
Prupe_7G217000	NAC	534	548	-	3	0.000932	0.777	TTAGTAATGGATAAG
Prupe_8G035500	NAC	818	838	+	-1.60938	0.000952	0.788	AGTTGCGTAGTTGACACGCAC
Prupe_8G035400	NAC	818	838	+	-1.60938	0.000952	0.788	AGTTGCGTAGTTGACACGCAC
Prupe_7G001200	NAC	757	771	+	6.48438	0.000968	1	CAGTGAAGTGGAAAA
Prupe_1G277500	NAC	181	191	-	6.73438	0.000988	1	GGACGGAACAA
Prupe_2G091500	NAC	470	481	-	7.26316	0.000989	0.455	ATCCAAGTCAAC
Prupe_5G125000	Nin-like	1348	1362	-	11.0156	9.1e-05	0.207	CTTTGACTTTTCCAT
Prupe_5G125000	Nin-like	1918	1932	-	10.875	9.96e-05	0.207	ACCCGTCCTTTCAGA
Prupe_5G193900	Nin-like	758	776	-	7.76562	0.000132	0.359	AAATCTTTTCCACTTCACT
Prupe_5G193900	Nin-like	110	128	+	6.82812	0.000192	0.359	GGGTTCCTTGACCTTCTCA
Prupe_5G125000	Nin-like	741	755	-	9.15625	0.000269	0.373	TTTTGCCTTTTGTCT
Prupe_5G193900	Nin-like	1912	1930	-	4.65625	0.000432	0.359	CCGTCCTTTCAGAGTTTCA
Prupe_5G193900	Nin-like	735	753	-	4.10938	0.000524	0.359	TTGCCTTTTGTCTTTCTTG
Prupe_5G193900	Nin-like	1447	1465	+	3.76562	0.00059	0.359	TTAACTTTTGCCCTTTTTT
Prupe_5G193900	Nin-like	1835	1853	-	3.54688	0.000635	0.359	ATAGCCCTTTAAATGCCTT
Prupe_5G125000	Nin-like	1452	1466	+	7.34375	0.000641	0.666	TTTTGCCCTTTTTTT
Prupe_5G193900	Nin-like	318	336	-	3.1875	0.000717	0.359	AAGACGGTTGATGTGACTA
Prupe_5G193900	Nin-like	1149	1167	-	2.9375	0.000779	0.359	AGCACGTTTTACCTACCAG
Prupe_5G193900	Nin-like	1272	1290	+	2.71875	0.000837	0.359	CTAGCTATTGATATACTAT
Prupe_5G193900	Nin-like	1988	2006	-	2.60938	0.000867	0.359	TCACCCACCGGACTTCTCA
Prupe_5G125000	Nin-like	942	956	+	6.42188	0.000945	0.786	AAGAGACTTTTCCAG
Prupe_5G193900	Nin-like	1283	1301	+	2.1875	0.000994	0.374	TATACTATTGCTTTTCTCA
Prupe_1G305900	RAV	2029	2036	-	9.37895	0.000323	1	GATGTTGG
Prupe_1G305900	RAV	1806	1813	-	6.90526	0.000701	1	TATGTTTT
Prupe_1G305900	RAV	1117	1124	+	5.78947	0.00095	1	TCTGTTTG
Prupe_1G305900	RAV	1108	1115	+	5.49474	0.000985	1	GATGTTTT
Prupe_7G074200	SBP	1393	1403	+	13.7031	3.14e-07	0.00131	CTTGTACGGAC
Prupe_5G002300	SBP	1392	1402	-	15.2031	2.27e-06	0.00947	TCCGTACAAGT
Prupe_5G149000	SBP	1393	1403	+	14.7656	2.46e-06	0.0103	CTTGTACGGAC
Prupe_3G139800	SBP	1394	1403	+	12.6737	1.61e-05	0.0675	TTGTACGGAC
Prupe_1G106500	SBP	1394	1402	+	11.581	5.34e-05	0.224	TTGTACGGA
Prupe_2G134900	SBP	41	56	+	11.9655	5.51e-05	0.229	AGCATTGTACCCCAAT
Prupe_1G106600	SBP	1393	1402	+	8.74286	0.000109	0.457	CTTGTACGGA
Prupe_3G139800	SBP	63	72	-	9.82105	0.000132	0.276	GGGTACGAAG
Prupe_1G106500	SBP	64	72	-	9.80952	0.000136	0.285	GGGTACGAA
Prupe_5G002300	SBP	64	74	+	8.84375	0.000152	0.317	TTCGTACCCAT
Prupe_7G074200	SBP	409	419	-	10.4375	0.000188	0.393	TATGTACTGTT
Prupe_5G149000	SBP	409	419	-	9.1875	0.000277	0.579	TATGTACTGTT
Prupe_1G144600	SBP	63	72	-	8.45223	0.000364	1	GGGTACGAAG
Prupe_5G149000	SBP	63	73	-	8.14062	0.000431	0.601	TGGGTACGAAG
Prupe_2G134900	SBP	1390	1405	-	8.03448	0.000585	1	AAGTCCGTACAAGTAA
Prupe_1G106600	SBP	1626	1635	+	4.75238	0.000654	0.889	TCCCTACAGA
Prupe_1G106600	SBP	1626	1635	-	4.75238	0.000654	0.889	TCTGTAGGGA
Prupe_1G106600	SBP	1393	1402	-	3.98095	0.00085	0.889	TCCGTACAAG
Prupe_1G144600	SBP	838	847	-	6.9172	0.000903	1	TGGTACCTCG
Prupe_2G134900	SBP	1592	1607	+	5.87356	0.000942	1	GATCGTGTACTCGATT
Prupe_2G134900	SBP	836	851	+	5.50575	0.00099	1	CACGAGGTACCAAATC
Prupe_1G144600	SBP	1394	1403	+	6.74522	0.000994	1	TTGTACGGAC
Prupe_1G371500	SRS	893	915	+	-5.6	5.51e-05	0.228	AGACCCCAAATCCAAGAACGAAA
Prupe_1G371500	SRS	626	648	-	-14.2842	0.000409	0.846	ATACTCTTCGAACTACACTCAAA
Prupe_1G371500	SRS	1428	1450	+	-16.9263	0.000708	0.975	ACACGCTTATGACAAGAGTTTAA
Prupe_1G371500	SRS	1433	1455	-	-18.6211	0.000992	1	AAAAGTTAAACTCTTGTCATAAG
Prupe_1G416700	TALE	1599	1618	+	9.53333	6.89e-05	0.197	TACTCGATTCTCCCATCCCC
Prupe_1G416700	TALE	875	894	+	8.62667	0.000101	0.197	CTGCCGAGTCTTCCCTCCAG
Prupe_1G416700	TALE	735	754	-	6.02667	0.000263	0.308	TTTGCCTTTTGTCTTTCTTG
Prupe_1G416700	TALE	224	243	-	5.38667	0.000326	0.308	TCGGTTGTGCCCTGAGCTGT
Prupe_1G416700	TALE	1128	1147	+	4.66667	0.00041	0.308	TTGTTGAGCCCTCTTTGCTT
Prupe_1G416700	TALE	908	927	-	3.54667	0.000575	0.308	TTTTCTATTTTCTTTCGTTC
Prupe_1G416700	TALE	1092	1111	-	3.48	0.000586	0.308	CATCGCACCTCTCTTTCGTG
Prupe_1G416700	TALE	960	979	-	3.22667	0.00063	0.308	CCCTTTAGGTGCTTTTGGGT
Prupe_1G416700	TALE	1108	1127	+	2.2	0.00084	0.365	GATGTTTTCTCTGTTTGGTC
Prupe_1G416700	TALE	1745	1764	+	1.65333	0.000973	0.38	GCTTAGGGGCCTCTTTGTTT
Prupe_4G171100	TCP	1689	1698	-	12.4526	2.15e-05	0.0893	TTGGAACCAC
Prupe_1G070500	TCP	1230	1240	+	5.28125	0.000108	0.434	GTGGCACCAAT
Prupe_5G206400	TCP	1689	1696	-	8.54286	0.000111	0.464	GGAACCAC
Prupe_3G308700	TCP	196	204	+	9.53684	0.000126	0.343	CGGTGCCAC
Prupe_2G152600	TCP	1230	1239	-	9.34737	0.000131	0.229	TTGGTGCCAC
Prupe_2G152600	TCP	1689	1698	-	9.32632	0.000133	0.229	TTGGAACCAC
Prupe_3G252600	TCP	1687	1699	-	3.18919	0.000134	0.557	ATTGGAACCACTT
Prupe_4G083500	TCP	1689	1696	-	7.91429	0.000159	0.245	GGAACCAC
Prupe_2G152600	TCP	195	204	+	8.90526	0.000165	0.229	ACGGTGCCAC
Prupe_3G240200	TCP	1688	1717	+	0.6375	0.000183	0.447	AGTGGTTCCAATACAACTTCCAGAAACTGA
Prupe_3G308700	TCP	1230	1238	-	8.83158	0.000187	0.343	TGGTGCCAC
Prupe_4G171100	TCP	1230	1239	+	8.02105	0.000193	0.287	GTGGCACCAA
Prupe_4G171100	TCP	195	204	-	7.84211	0.000207	0.287	GTGGCACCGT
Prupe_1G070500	TCP	375	385	-	2.34375	0.000237	0.434	GTGGGTAACTC
Prupe_3G308700	TCP	1689	1697	-	8.22105	0.000249	0.343	TGGAACCAC
Prupe_4G083500	TCP	1232	1239	+	6.75238	0.000257	0.245	GGCACCAA
Prupe_4G083500	TCP	233	240	+	6.34286	0.000305	0.245	GGCACAAC
Prupe_5G206400	TCP	1750	1757	+	1.60952	0.000307	0.521	GGGGCCTC
Prupe_4G083500	TCP	1750	1757	+	2.69524	0.000333	0.245	GGGGCCTC
Prupe_5G191200	TCP	1689	1708	-	-12.1609	0.000339	0.388	GGAAGTTGTATTGGAACCAC
Prupe_1G070500	TCP	108	118	+	0.71875	0.000356	0.434	ATGGGTTCCTT
Prupe_4G083500	TCP	197	204	+	2.4381	0.000357	0.245	GGTGCCAC
Prupe_4G083500	TCP	1230	1237	-	2.4381	0.000357	0.245	GGTGCCAC
Prupe_3G240200	TCP	1229	1258	+	-2.1625	0.00038	0.447	TGTGGCACCAATTCAGGCCCATTGTGGATG
Prupe_3G308700	TCP	108	116	-	7.18947	0.000402	0.416	GGAACCCAT
Prupe_5G191200	TCP	1680	1699	+	-13.2299	0.000427	0.388	TAATTGGAAGTGGTTCCAAT
Prupe_1G070500	TCP	194	204	-	-0.328125	0.000457	0.434	GTGGCACCGTT
Prupe_5G191200	TCP	1738	1757	+	-13.5747	0.00046	0.388	AAATAATGCTTAGGGGCCTC
Prupe_5G191200	TCP	366	385	+	-14.0115	0.000504	0.388	TAAACAATGGAGTTACCCAC
Prupe_3G308700	TCP	1242	1250	+	6.61053	0.00052	0.431	CAGGCCCAT
Prupe_3G240200	TCP	1748	1777	+	-3.55	0.000532	0.447	TAGGGGCCTCTTTGTTTAGGGTAGCCAAAT
Prupe_5G191200	TCP	1121	1140	+	-14.3793	0.000543	0.388	TTTGGTCTTGTTGAGCCCTC
Prupe_5G206400	TCP	1230	1237	-	0.771429	0.000589	0.521	GGTGCCAC
Prupe_5G206400	TCP	197	204	+	0.771429	0.000589	0.521	GGTGCCAC
Prupe_2G152600	TCP	1131	1140	+	6.01053	0.000603	0.487	TTGAGCCCTC
Prupe_2G152600	TCP	1748	1757	+	5.97895	0.000611	0.487	TAGGGGCCTC
Prupe_1G070500	TCP	1689	1699	+	-1.64062	0.000624	0.434	GTGGTTCCAAT
Prupe_4G171100	TCP	1241	1250	+	5.18947	0.000626	0.618	TCAGGCCCAT
Prupe_3G240200	TCP	107	136	+	-4.275	0.000631	0.447	AATGGGTTCCTTGACCTTCTCATTATGGAA
Prupe_3G240200	TCP	1989	2018	-	-4.2875	0.000633	0.447	CATGTGACCTTCTCACCCACCGGACTTCTC
Prupe_5G191200	TCP	1888	1907	+	-15.3218	0.000656	0.388	AGAAGTCTTGTAGCTGGCAC
Prupe_5G206400	TCP	1232	1239	+	0.67619	0.000662	0.521	GGCACCAA
Prupe_5G191200	TCP	375	394	-	-15.4368	0.000671	0.388	GCGAAATCTGTGGGTAACTC
Prupe_3G240200	TCP	1730	1759	-	-4.5625	0.000674	0.447	AAGAGGCCCCTAAGCATTATTTGTTGCATT
Prupe_4G083500	TCP	1133	1140	+	1.50476	0.000676	0.398	GAGCCCTC
Prupe_1G070500	TCP	2023	2033	-	-2.01562	0.000677	0.434	GTTGGTTCCGT
Prupe_3G308700	TCP	1132	1140	+	5.91579	0.000715	0.494	TGAGCCCTC
Prupe_1G070500	TCP	1130	1140	-	-2.42188	0.000743	0.434	GAGGGCTCAAC
Prupe_4G171100	TCP	1230	1239	-	4.73684	0.000743	0.618	TTGGTGCCAC
Prupe_3G252600	TCP	1240	1252	+	-3.67568	0.000765	0.892	TTCAGGCCCATTG
Prupe_2G152600	TCP	1241	1250	+	5.31579	0.000811	0.487	TCAGGCCCAT
Prupe_3G252600	TCP	889	901	-	-3.97297	0.000816	0.892	TTGGGGTCTGGAG
Prupe_1G070500	TCP	1152	1162	+	-2.9375	0.000837	0.434	GTAGGTAAAAC
Prupe_2G152600	TCP	108	117	-	5.22105	0.000845	0.487	AGGAACCCAT
Prupe_3G252600	TCP	2021	2033	-	-4.22973	0.000862	0.892	GTTGGTTCCGTTG
Prupe_5G206400	TCP	839	846	-	0.285714	0.000874	0.521	GGTACCTC
Prupe_5G206400	TCP	1206	1213	+	0.285714	0.000874	0.521	GGAACCTC
Prupe_2G152600	TCP	1204	1213	-	4.98947	0.000939	0.487	GAGGTTCCAT
Prupe_4G171100	TCP	231	240	+	4.12632	0.000944	0.654	AGGGCACAAC
Prupe_3G308700	TCP	1956	1964	+	5.21053	0.000967	0.506	CATGCCCAC
Prupe_3G308700	TCP	377	385	+	5.17895	0.000978	0.506	GTTACCCAC
Prupe_3G240200	TCP	1203	1232	+	-6.3375	0.000999	0.568	CATGGAACCTCAACCTCCCGCTGATTTGTG
Prupe_7G120600	Trihelix	190	203	+	12.0625	3.16e-05	0.132	CCATAACGGTGCCA
Prupe_3G118000	Trihelix	1990	2004	+	8.15625	0.00014	0.483	AGAAGTCCGGTGGGT
Prupe_3G036000	Trihelix	1992	2002	-	7.8125	0.000167	0.592	CCACCGGACTT
Prupe_1G216100	Trihelix	1747	1764	-	9.84058	0.000183	0.339	AAACAAAGAGGCCCCTAA
Prupe_1G216100	Trihelix	1762	1779	-	9.69565	0.0002	0.339	ACATTTGGCTACCCTAAA
Prupe_8G028700	Trihelix	149	164	+	9.46875	0.000233	0.97	AGAGTAAAATATGACA
Prupe_3G118000	Trihelix	86	100	+	6.65625	0.000236	0.483	CAATCTCCGACTTCA
Prupe_1G216100	Trihelix	39	56	+	9.34783	0.000246	0.339	TAAGCATTGTACCCCAAT
Prupe_8G028800	Trihelix	146	159	-	9.4375	0.000255	0.516	TATTTTACTCTTTT
Prupe_6G278600	Trihelix	1151	1167	-	6.94203	0.000277	0.614	AGCACGTTTTACCTACC
Prupe_4G003900	Trihelix	782	796	-	8.78261	0.000287	1	TATCTTTGTTACTTT
Prupe_6G278600	Trihelix	1158	1174	+	6.02899	0.000357	0.614	AAAACGTGCTCAACGAC
Prupe_8G028800	Trihelix	779	792	-	8.875	0.000357	0.516	TTTGTTACTTTCGT
Prupe_8G028800	Trihelix	1053	1066	+	8.79688	0.000373	0.516	TTTATTACAGTTGT
Prupe_3G036000	Trihelix	182	192	-	5.29688	0.000374	0.592	TGGACGGAACA
Prupe_1G235200	Trihelix	1766	1773	+	2.20952	0.000385	0.77	GGGTAGCC
Prupe_1G235200	Trihelix	1766	1773	-	2.20952	0.000385	0.77	GGCTACCC
Prupe_3G118000	Trihelix	180	194	+	4.90625	0.000404	0.552	GTTGTTCCGTCCATA
Prupe_3G036000	Trihelix	88	98	-	4.85938	0.000425	0.592	AAGTCGGAGAT
Prupe_6G278600	Trihelix	1773	1789	+	5.17391	0.000443	0.614	CAAATGTGTGACTAATT
Prupe_1G405000	Trihelix	1154	1163	-	8.54167	0.00048	0.736	CGTTTTACCT
Prupe_4G003900	Trihelix	149	163	-	7.28986	0.000592	1	GTCATATTTTACTCT
Prupe_1G405000	Trihelix	374	383	+	8.28125	0.000599	0.736	GGAGTTACCC
Prupe_1G216100	Trihelix	1446	1463	+	7.68116	0.00062	0.537	TTTAACTTTTGCCCTTTT
Prupe_6G278600	Trihelix	2004	2020	-	3.50725	0.000646	0.621	TCCATGTGACCTTCTCA
Prupe_1G216100	Trihelix	885	902	+	7.5942	0.000649	0.537	TTCCCTCCAGACCCCAAA
Prupe_3G036000	Trihelix	2020	2030	+	3.125	0.000669	0.699	ACAACGGAACC
Prupe_1G405000	Trihelix	487	496	-	8.10417	0.000679	0.736	TTATTTACTC
Prupe_1G405000	Trihelix	1574	1583	+	8.0625	0.000703	0.736	GTATTTACAC
Prupe_3G118000	Trihelix	2018	2032	-	2.67188	0.00073	0.748	TTGGTTCCGTTGTCC
Prupe_6G278600	Trihelix	1478	1494	+	2.7971	0.000747	0.621	AGAATGTGGATTTAGGA
Prupe_7G120600	Trihelix	1026	1039	-	3.76562	0.000815	1	CATTAACGTATTTG
Prupe_8G028700	Trihelix	486	501	+	6.71875	0.000875	1	TGAGTAAATAATTCAA
Prupe_1G216100	Trihelix	1843	1860	-	6.97101	0.000884	0.61	CCTAACTATAGCCCTTTA
Prupe_7G120600	Trihelix	705	718	+	3.45312	0.000894	1	TTTTGACGACAATG
Prupe_8G028700	Trihelix	1664	1679	+	6.59375	0.00092	1	CCAGTGAAATAAGGTA
Prupe_6G341000	Trihelix	1055	1064	-	6.69492	0.000968	1	AACTGTAATA
Prupe_3G118000	Trihelix	389	403	-	1.40625	0.00098	0.804	GTCACTCGGGCGAAA
Prupe_6G341000	Trihelix	325	334	-	6.65254	0.000982	1	GACGGTTGAT
Prupe_8G028700	Trihelix	782	797	+	6.42188	0.000985	1	AAAGTAACAAAGATAT
Prupe_8G028800	Trihelix	1538	1551	-	6.82812	0.000996	1	TATTTTACTAATAT
Prupe_7G016600	WOX	674	684	-	11.137	0.000109	0.456	TGTTAATTAGA
Prupe_7G167700	WOX	806	816	-	8.925	0.000193	0.801	TCAGTCAGTCT
Prupe_7G016600	WOX	605	615	+	9.9726	0.000223	0.464	TATTAATTAGA
Prupe_7G183300	WOX	83	92	+	8.45926	0.000371	0.791	AATCAATCTC
Prupe_7G016600	WOX	606	616	-	8.89041	0.000392	0.545	ATCTAATTAAT
Prupe_7G183300	WOX	1586	1595	-	8.20741	0.000431	0.791	GATCAATCTC
Prupe_7G183300	WOX	848	857	+	7.74074	0.000567	0.791	AATCAACCAA
Prupe_7G167700	WOX	1968	1978	+	5.6375	0.000706	1	CCAGTCAAACC
Prupe_7G016600	WOX	452	462	-	6.35616	0.000942	0.983	GGTTAGTTGCA
Prupe_7G167700	WOX	846	856	+	4.75	0.000974	1	CAAATCAACCA
Prupe_1G407500	WRKY	1350	1362	-	17.0625	7.13e-07	0.00297	CTTTGACTTTTCC
Prupe_3G098100	WRKY	1350	1364	-	15.6875	1.43e-06	0.00596	TTCTTTGACTTTTCC
Prupe_1G393000	WRKY	115	125	-	14.9219	2.14e-06	0.00893	GAAGGTCAAGG
Prupe_1G280700	WRKY	1352	1362	+	15.6406	2.49e-06	0.0104	AAAAGTCAAAG
Prupe_6G046900	WRKY	1352	1362	+	15.4062	3.32e-06	0.0139	AAAAGTCAAAG
Prupe_4G075400	WRKY	1352	1364	-	15.125	3.34e-06	0.0139	TTCTTTGACTTTT
Prupe_2G231300	WRKY	1351	1364	-	15.125	4.62e-06	0.0192	TTCTTTGACTTTTC
Prupe_5G106700	WRKY	1352	1362	+	15.0781	4.69e-06	0.0196	AAAAGTCAAAG
Prupe_8G230700	WRKY	1352	1362	+	15.3906	5.42e-06	0.0226	AAAAGTCAAAG
Prupe_6G230600	WRKY	1351	1364	-	14.1406	6.79e-06	0.0282	TTCTTTGACTTTTC
Prupe_1G223200	WRKY	1352	1364	+	14.4688	8.01e-06	0.0334	AAAAGTCAAAGAA
Prupe_2G302500	WRKY	1352	1364	-	14.1094	8.26e-06	0.0344	TTCTTTGACTTTT
Prupe_2G177400	WRKY	1352	1364	+	14.3594	9.04e-06	0.0377	AAAAGTCAAAGAA
Prupe_1G459100	WRKY	1351	1364	-	14.0781	9.98e-06	0.0415	TTCTTTGACTTTTC
Prupe_3G098100	WRKY	113	127	+	13.75	1.27e-05	0.0265	TTCCTTGACCTTCTC
Prupe_1G393000	WRKY	469	479	-	13.375	1.53e-05	0.0319	CCAAGTCAACA
Prupe_4G066400	WRKY	1352	1362	+	13.2188	1.81e-05	0.0755	AAAAGTCAAAG
Prupe_4G101100	WRKY	1352	1364	+	13.1562	1.83e-05	0.0684	AAAAGTCAAAGAA
Prupe_4G075400	WRKY	467	479	+	13.2188	2.07e-05	0.0432	TGTGTTGACTTGG
Prupe_3G098100	WRKY	467	481	+	13.1562	2.14e-05	0.0297	TGTGTTGACTTGGAT
Prupe_2G264900	WRKY	467	478	+	12.9531	2.33e-05	0.0971	TGTGTTGACTTG
Prupe_6G046900	WRKY	469	479	-	13.1562	2.37e-05	0.0495	CCAAGTCAACA
Prupe_1G280700	WRKY	469	479	-	13	2.69e-05	0.0561	CCAAGTCAACA
Prupe_1G223200	WRKY	467	479	-	12.3906	3e-05	0.0626	CCAAGTCAACACA
Prupe_2G265000	WRKY	467	479	+	11.3281	3.14e-05	0.131	TGTGTTGACTTGG
Prupe_4G101100	WRKY	467	479	-	12	3.28e-05	0.0684	CCAAGTCAACACA
Prupe_1G393000	WRKY	1352	1362	+	12.5938	3.44e-05	0.0479	AAAAGTCAAAG
Prupe_4G232600	WRKY	1352	1364	-	12.5469	3.58e-05	0.0904	TTCTTTGACTTTT
Prupe_4G017600	WRKY	469	487	+	12	3.87e-05	0.134	TGTTGACTTGGATTATATG
Prupe_8G230700	WRKY	469	479	-	11.5156	3.92e-05	0.0817	CCAAGTCAACA
Prupe_1G283500	WRKY	1353	1362	+	11.0938	4.1e-05	0.111	AAAGTCAAAG
Prupe_4G232600	WRKY	467	479	+	12.25	4.34e-05	0.0904	TGTGTTGACTTGG
Prupe_2G177400	WRKY	467	479	-	11.375	4.37e-05	0.0911	CCAAGTCAACACA
Prupe_1G459100	WRKY	467	480	+	11.0781	4.68e-05	0.0973	TGTGTTGACTTGGA
Prupe_4G066400	WRKY	469	479	-	11.5156	4.81e-05	0.1	CCAAGTCAACA
Prupe_5G106700	WRKY	469	479	-	11.7344	5.25e-05	0.11	CCAAGTCAACA
Prupe_3G008600	WRKY	469	476	-	12.0211	5.36e-05	0.152	AGTCAACA
Prupe_1G283500	WRKY	469	478	-	10.7708	5.77e-05	0.111	CAAGTCAACA
Prupe_1G407500	WRKY	115	127	+	10.9844	5.93e-05	0.123	CCTTGACCTTCTC
Prupe_2G231300	WRKY	467	480	+	10.9688	6.18e-05	0.127	TGTGTTGACTTGGA
Prupe_2G264900	WRKY	1353	1364	-	11	6.42e-05	0.134	TTCTTTGACTTT
Prupe_4G017600	WRKY	1344	1362	-	10.8841	6.47e-05	0.134	CTTTGACTTTTCCATGTTT
Prupe_3G008600	WRKY	1355	1362	+	12.0105	7.31e-05	0.152	AGTCAAAG
Prupe_6G230600	WRKY	467	480	+	7.34375	7.76e-05	0.161	TGTGTTGACTTGGA
Prupe_1G283500	WRKY	115	124	-	10.5208	7.98e-05	0.111	AAGGTCAAGG
Prupe_2G265000	WRKY	1352	1364	-	8.17188	8.42e-05	0.176	TTCTTTGACTTTT
Prupe_2G133800	WRKY	114	123	+	10.4831	8.9e-05	0.264	TCCTTGACCT
Prupe_4G232600	WRKY	1967	1979	-	10.7656	9.09e-05	0.126	AGGTTTGACTGGA
Prupe_2G231300	WRKY	113	126	+	10.0938	9.2e-05	0.127	TTCCTTGACCTTCT
Prupe_1G407500	WRKY	469	481	+	9.48438	0.000108	0.15	TGTTGACTTGGAT
Prupe_3G008600	WRKY	1970	1977	+	9.70526	0.000114	0.159	AGTCAAAC
Prupe_3G202000	WRKY	117	127	+	8.1954	0.000116	0.483	TTGACCTTCTC
Prupe_2G302500	WRKY	467	479	+	6.9375	0.000122	0.255	TGTGTTGACTTGG
Prupe_2G133800	WRKY	2017	2026	-	9.9661	0.000128	0.264	CCGTTGTCCA
Prupe_1G223200	WRKY	113	125	-	9.26562	0.000135	0.187	GAAGGTCAAGGAA
Prupe_4G075400	WRKY	113	125	+	9.84375	0.000165	0.23	TTCCTTGACCTTC
Prupe_6G230600	WRKY	2039	2052	-	4.625	0.000166	0.231	TGTGTTGATTTTGT
Prupe_6G036300	WRKY	1969	1976	+	10.1579	0.000201	0.602	CAGTCAAA
Prupe_2G264900	WRKY	113	124	+	7.28125	0.00021	0.26	TTCCTTGACCTT
Prupe_1G283500	WRKY	1968	1977	+	9.46875	0.000215	0.225	CCAGTCAAAC
Prupe_6G046900	WRKY	1967	1977	+	8.10938	0.00023	0.321	TCCAGTCAAAC
Prupe_4G017600	WRKY	1959	1977	-	5.7971	0.000232	0.32	GTTTGACTGGAGGGTGGGC
Prupe_1G280700	WRKY	1967	1977	+	7.84375	0.000243	0.331	TCCAGTCAAAC
Prupe_2G264900	WRKY	1968	1979	-	6.65625	0.000249	0.26	AGGTTTGACTGG
Prupe_2G302500	WRKY	113	125	+	3.875	0.000272	0.378	TTCCTTGACCTTC
Prupe_4G232600	WRKY	113	125	+	7.125	0.000289	0.301	TTCCTTGACCTTC
Prupe_1G280700	WRKY	115	125	-	6.5	0.000317	0.331	GAAGGTCAAGG
Prupe_3G008600	WRKY	2018	2025	+	6.06316	0.000335	0.327	GGACAACG
Prupe_6G036300	WRKY	470	477	-	9.35789	0.000336	0.602	AAGTCAAC
Prupe_1G459100	WRKY	1966	1979	-	4.84375	0.000347	0.411	AGGTTTGACTGGAG
Prupe_8G230700	WRKY	1061	1071	+	4.3125	0.00037	0.393	AGTTGTCAAAG
Prupe_4G101100	WRKY	1967	1979	+	4.09375	0.000374	0.413	TCCAGTCAAACCT
Prupe_2G231300	WRKY	1966	1979	-	5.8125	0.000375	0.388	AGGTTTGACTGGAG
Prupe_4G017600	WRKY	1154	1172	-	2.76812	0.000375	0.388	CGTTGAGCACGTTTTACCT
Prupe_4G075400	WRKY	1967	1979	-	7.625	0.00038	0.396	AGGTTTGACTGGA
Prupe_3G008600	WRKY	115	122	-	5.86316	0.000394	0.327	GGTCAAGG
Prupe_1G459100	WRKY	1060	1073	-	4.28125	0.000396	0.411	TCCTTTGACAACTG
Prupe_3G098100	WRKY	1965	1979	-	6.98438	0.0004	0.416	AGGTTTGACTGGAGG
Prupe_5G106700	WRKY	1061	1071	+	6.21875	0.000403	0.451	AGTTGTCAAAG
Prupe_2G133800	WRKY	1354	1363	-	7.81356	0.000403	0.417	TCTTTGACTT
Prupe_1G223200	WRKY	1967	1979	+	5.76562	0.000404	0.421	TCCAGTCAAACCT
Prupe_2G177400	WRKY	1061	1073	+	3.39062	0.000418	0.405	AGTTGTCAAAGGA
Prupe_2G302500	WRKY	2015	2027	-	2.04688	0.000419	0.42	TCCGTTGTCCATG
Prupe_6G036300	WRKY	116	123	-	8.68421	0.000441	0.602	AGGTCAAG
Prupe_2G133800	WRKY	468	477	+	7.61864	0.000452	0.417	GTGTTGACTT
Prupe_8G230700	WRKY	826	836	-	2.71875	0.000469	0.393	GCGTGTCAACT
Prupe_8G230700	WRKY	1967	1977	+	2.6875	0.000471	0.393	TCCAGTCAAAC
Prupe_1G393000	WRKY	1967	1977	+	7.09375	0.000478	0.499	TCCAGTCAAAC
Prupe_2G177400	WRKY	824	836	-	2.53125	0.000479	0.405	GCGTGTCAACTAC
Prupe_4G066400	WRKY	1061	1071	+	4.4375	0.000483	0.52	AGTTGTCAAAG
Prupe_3G008600	WRKY	1165	1172	+	5.54737	0.000484	0.335	GCTCAACG
Prupe_2G177400	WRKY	1967	1979	+	2.4375	0.000485	0.405	TCCAGTCAAACCT
Prupe_1G280700	WRKY	1445	1455	-	3.26562	0.000492	0.411	AAAAGTTAAAC
Prupe_1G459100	WRKY	824	837	+	3.20312	0.0005	0.416	GTAGTTGACACGCA
Prupe_2G302500	WRKY	1061	1073	-	1.23438	0.000503	0.42	TCCTTTGACAACT
Prupe_2G133800	WRKY	1164	1173	-	7.4322	0.000504	0.417	TCGTTGAGCA
Prupe_4G101100	WRKY	1061	1073	+	2.32812	0.000506	0.413	AGTTGTCAAAGGA
Prupe_6G046900	WRKY	2015	2025	+	0.5625	0.000506	0.416	CATGGACAACG
Prupe_2G265000	WRKY	824	836	+	0.234375	0.000513	0.466	GTAGTTGACACGC
Prupe_5G106700	WRKY	826	836	-	4.89062	0.000539	0.451	GCGTGTCAACT
Prupe_5G106700	WRKY	1967	1977	+	4.875	0.00054	0.451	TCCAGTCAAAC
Prupe_1G223200	WRKY	1061	1073	+	4.5	0.000542	0.452	AGTTGTCAAAGGA
Prupe_4G101100	WRKY	824	836	-	1.89062	0.000542	0.413	GCGTGTCAACTAC
Prupe_6G046900	WRKY	115	125	-	0.046875	0.000561	0.416	GAAGGTCAAGG
Prupe_4G066400	WRKY	826	836	-	3.64062	0.000568	0.52	GCGTGTCAACT
Prupe_4G017600	WRKY	115	133	+	0.811594	0.000576	0.453	CCTTGACCTTCTCATTATG
Prupe_1G283500	WRKY	826	835	-	8.20833	0.000577	0.413	CGTGTCAACT
Prupe_1G283500	WRKY	1062	1071	+	8.16667	0.000592	0.413	GTTGTCAAAG
Prupe_4G075400	WRKY	1061	1073	-	5.96875	0.000593	0.494	TCCTTTGACAACT
Prupe_2G265000	WRKY	113	125	+	-0.453125	0.000595	0.466	TTCCTTGACCTTC
Prupe_2G265000	WRKY	2015	2027	-	-0.5625	0.000608	0.466	TCCGTTGTCCATG
Prupe_6G036300	WRKY	808	815	-	7.63158	0.000611	0.602	CAGTCAGT
Prupe_3G098100	WRKY	1315	1329	+	4.76562	0.000612	0.464	ACTTATGACTGTTTA
Prupe_2G302500	WRKY	738	750	-	0.328125	0.000614	0.427	CCTTTTGTCTTTC
Prupe_4G066400	WRKY	1967	1977	+	3.125	0.000622	0.52	TCCAGTCAAAC
Prupe_6G230600	WRKY	844	857	-	-0.734375	0.000623	0.519	TTGGTTGATTTGGT
Prupe_6G046900	WRKY	2040	2050	+	-0.515625	0.000634	0.416	CAAAATCAACA
Prupe_3G008600	WRKY	803	810	-	4.13684	0.000647	0.373	AGTCTACC
Prupe_4G017600	WRKY	2007	2025	-	0.289855	0.000657	0.453	CGTTGTCCATGTGACCTTC
Prupe_2G133800	WRKY	825	834	+	6.88136	0.00066	0.455	TAGTTGACAC
Prupe_2G231300	WRKY	1766	1779	-	2.54688	0.000661	0.523	ACATTTGGCTACCC
Prupe_3G098100	WRKY	1033	1047	+	4.25	0.000669	0.464	GTTAATGACTGTGTC
Prupe_2G265000	WRKY	2040	2052	-	-1	0.000671	0.466	TGTGTTGATTTTG
Prupe_1G407500	WRKY	1317	1329	+	3.32812	0.000705	0.621	TTATGACTGTTTA
Prupe_3G202000	WRKY	1965	1975	-	2.37931	0.00071	0.683	TTGACTGGAGG
Prupe_4G101100	WRKY	113	125	-	0.234375	0.000711	0.413	GAAGGTCAAGGAA
Prupe_1G393000	WRKY	2040	2050	+	5.15625	0.000716	0.509	CAAAATCAACA
Prupe_3G008600	WRKY	1064	1071	+	3.93684	0.000717	0.373	TGTCAAAG
Prupe_6G036300	WRKY	1354	1361	+	7.55789	0.000719	0.602	AAGTCAAA
Prupe_6G230600	WRKY	113	126	+	-1.39062	0.000721	0.519	TTCCTTGACCTTCT
Prupe_8G230700	WRKY	115	125	-	-0.046875	0.000725	0.457	GAAGGTCAAGG
Prupe_4G101100	WRKY	2015	2027	+	0.03125	0.000737	0.413	CATGGACAACGGA
Prupe_2G264900	WRKY	2016	2027	-	-0.046875	0.000737	0.615	TCCGTTGTCCAT
Prupe_1G407500	WRKY	2005	2017	-	3.09375	0.000745	0.621	ATGTGACCTTCTC
Prupe_2G177400	WRKY	113	125	-	-0.28125	0.000754	0.467	GAAGGTCAAGGAA
Prupe_4G075400	WRKY	824	836	+	4.875	0.000754	0.524	GTAGTTGACACGC
Prupe_8G230700	WRKY	2040	2050	+	-0.421875	0.000767	0.457	CAAAATCAACA
Prupe_4G232600	WRKY	493	505	-	2.67188	0.000779	0.533	GTCTTTGAATTAT
Prupe_3G202000	WRKY	1350	1360	-	2.03448	0.000783	0.683	TTGACTTTTCC
Prupe_2G177400	WRKY	2040	2052	+	-0.5	0.000784	0.467	CAAAATCAACACA
Prupe_6G230600	WRKY	1060	1073	-	-1.78125	0.000787	0.519	TCCTTTGACAACTG
Prupe_4G101100	WRKY	2040	2052	+	-0.375	0.000793	0.413	CAAAATCAACACA
Prupe_1G280700	WRKY	2015	2025	+	0.34375	0.0008	0.557	CATGGACAACG
Prupe_2G302500	WRKY	2040	2052	-	-0.921875	0.000804	0.466	TGTGTTGATTTTG
Prupe_4G066400	WRKY	115	125	-	1.53125	0.000812	0.556	GAAGGTCAAGG
Prupe_4G232600	WRKY	1315	1327	+	2.46875	0.000814	0.533	ACTTATGACTGTT
Prupe_1G393000	WRKY	1071	1081	+	4.5625	0.000822	0.509	GGAGGTCATGT
Prupe_3G202000	WRKY	828	838	+	1.86207	0.000827	0.683	TTGACACGCAC
Prupe_2G231300	WRKY	2014	2027	-	0.625	0.000835	0.523	TCCGTTGTCCATGT
Prupe_6G046900	WRKY	745	755	+	-1.45312	0.000861	0.416	AAAAGGCAAAA
Prupe_1G223200	WRKY	824	836	-	2.03125	0.000862	0.599	GCGTGTCAACTAC
Prupe_2G231300	WRKY	2039	2052	-	0.203125	0.000882	0.523	TGTGTTGATTTTGT
Prupe_6G046900	WRKY	493	503	+	-1.54688	0.00089	0.416	ATAATTCAAAG
Prupe_2G302500	WRKY	1767	1779	-	-1.42188	0.000894	0.466	ACATTTGGCTACC
Prupe_4G232600	WRKY	2015	2027	-	2.04688	0.000896	0.533	TCCGTTGTCCATG
Prupe_6G046900	WRKY	845	855	+	-1.57812	0.000896	0.416	CCAAATCAACC
Prupe_3G202000	WRKY	1590	1600	+	1.55172	0.0009	0.683	TTGATCGTGTA
Prupe_1G393000	WRKY	1035	1045	-	4.20312	0.000904	0.509	CACAGTCATTA
Prupe_4G017600	WRKY	2032	2050	-	-0.855072	0.000904	0.534	TGTTGATTTTGTGTGATGT
Prupe_2G133800	WRKY	1063	1072	-	6.16102	0.00092	0.51	CCTTTGACAA
Prupe_1G283500	WRKY	2016	2025	+	7.45833	0.000927	0.553	ATGGACAACG
Prupe_4G066400	WRKY	2015	2025	+	0.765625	0.000931	0.556	CATGGACAACG
Prupe_6G230600	WRKY	1443	1456	+	-2.57812	0.000937	0.519	GAGTTTAACTTTTG
Prupe_2G264900	WRKY	2041	2052	-	-1.34375	0.00095	0.66	TGTGTTGATTTT
Prupe_1G280700	WRKY	2040	2050	+	-0.4375	0.000956	0.57	CAAAATCAACA
Prupe_1G393000	WRKY	1317	1327	-	3.9375	0.000975	0.509	AACAGTCATAA
Prupe_3G202000	WRKY	471	481	+	1.24138	0.000981	0.683	TTGACTTGGAT
Prupe_2G133800	WRKY	1969	1978	-	6.02542	0.000986	0.51	GGTTTGACTG
Prupe_8G230700	WRKY	2015	2025	+	-1.6875	0.000992	0.518	CATGGACAACG
Prupe_6G230600	WRKY	744	757	-	-2.875	0.000998	0.519	GTTTTTGCCTTTTG
Prupe_2G265000	WRKY	1967	1979	-	-2.8125	0.000998	0.594	AGGTTTGACTGGA
Prupe_2G140400	YABBY	352	361	+	10.6078	4.26e-05	0.178	GAATCATAAT
Prupe_2G140400	YABBY	724	733	-	9.51634	0.000135	0.282	AAATCATAAT
Prupe_2G140400	YABBY	722	731	+	8.60131	0.000306	0.336	CAATTATGAT
Prupe_2G140400	YABBY	213	222	+	8.40523	0.000371	0.336	TAATAATAAG
Prupe_1G290100	YABBY	352	359	-	9.57812	0.000391	1	TATGATTC
Prupe_2G140400	YABBY	697	706	+	8.33987	0.000402	0.336	CAATAATATT
Prupe_2G140400	YABBY	210	219	+	8.13072	0.000491	0.343	AAATAATAAT
Prupe_2G140400	YABBY	925	934	+	7.53595	0.000785	0.469	AAATCATAAA
Prupe_1G290100	YABBY	726	733	+	7.54688	0.000863	1	TATGATTT
Prupe_1G290100	YABBY	925	932	-	7.54688	0.000863	1	TATGATTT
Prupe_1G378200	ZF-HD	1033	1043	-	10.5672	0.000157	0.658	CAGTCATTAAC
Prupe_1G586000	ZF-HD	1781	1794	+	9.71875	0.000161	0.339	TGACTAATTATTAG
Prupe_1G586000	ZF-HD	1784	1797	-	9.5	0.000176	0.339	AAACTAATAATTAG
Prupe_1G586000	ZF-HD	693	706	+	8.20312	0.000296	0.339	TAAACAATAATATT
Prupe_1G586000	ZF-HD	718	731	+	7.92188	0.000325	0.339	GAGACAATTATGAT
Prupe_1G586000	ZF-HD	600	613	-	6.95312	0.000437	0.364	TAATTAATAATTTG
Prupe_1G378200	ZF-HD	1783	1793	-	8.80597	0.000455	0.951	TAATAATTAGT
Prupe_1G586000	ZF-HD	1676	1689	-	5.92188	0.000585	0.406	CTTCCAATTATACC
Prupe_1G586000	ZF-HD	209	222	+	5.125	0.000718	0.427	AAAATAATAATAAG
Prupe_1G378200	ZF-HD	606	616	-	7.32836	0.000876	1	ATCTAATTAAT
Prupe_1G586000	ZF-HD	597	610	+	4.125	0.000894	0.465	ACCCAAATTATTAA
Prupe_1G378200	ZF-HD	673	683	+	7.01493	0.000982	1	TTCTAATTAAC
